# Supplementary material for: RORγt+ APCs require a distinct cis-regulatory element to instruct tolerance to dietary antigens
Source: Research Square preprint supplement (doi:10.21203/rs.3.rs-4865841/v1), 2025-08-01
Supplement: Supplementary file 2 [file 262bde3333ee0db385b7861c.xlsx]

## Sheet: ILC3 369-1
Accession	Description	Score	Coverage	# Proteins	# Unique Peptides	# Peptides	# PSMs	# AAs	MW [kDa]	calc. pI	Gene name
Q9QZQ8-2	Isoform 1 of Core histone macro-H2A.1 OS=Mus musculus OX=10090 GN=Macroh2a1 - [H2AY_MOUSE]	330.421	61.52	3	1	24	143	369	39.2652	9.83252	Macroh2a1
Q9QZQ8	Core histone macro-H2A.1 OS=Mus musculus OX=10090 GN=Macroh2a1 PE=1 SV=3 - [H2AY_MOUSE]	326.077	61.83	3	2	25	144	372	39.7105	9.80322	Macroh2a1
Q60668-3	Isoform 3 of Heterogeneous nuclear ribonucleoprotein D0 OS=Mus musculus OX=10090 GN=Hnrnpd - [HNRPD_MOUSE]	150.925	47.71	11	3	23	72	306	32.7341	8.1626	Hnrnpd
G5E8G0	Heterogeneous nuclear ribonucleoprotein D0 OS=Mus musculus OX=10090 GN=Hnrnpd PE=1 SV=1 - [G5E8G0_MOUSE]	145.993	45.64	10	1	21	69	287	30.5891	8.41162	Hnrnpd
A2AL12	Heterogeneous nuclear ribonucleoprotein A3 OS=Mus musculus OX=10090 GN=Hnrnpa3 PE=1 SV=1 - [A2AL12_MOUSE]	123.327	44.34	11	16	20	58	318	34.4545	9.1001	Hnrnpa3
Q9Z204	Heterogeneous nuclear ribonucleoproteins C1/C2 OS=Mus musculus OX=10090 GN=Hnrnpc PE=1 SV=1 - [HNRPC_MOUSE]	120.013	51.76	9	1	20	48	313	34.3639	5.04639	Hnrnpc
Q9D6G1	Uncharacterized protein OS=Mus musculus OX=10090 GN=Hnrnpab PE=2 SV=1 - [Q9D6G1_MOUSE]	118.708	40.58	6	16	17	53	276	29.9038	6.41748	Hnrnpab
Q9Z204-2	Isoform C1 of Heterogeneous nuclear ribonucleoproteins C1/C2 OS=Mus musculus OX=10090 GN=Hnrnpc - [HNRPC_MOUSE]	116.513	49.67	10	1	20	47	300	33.0362	5.03369	Hnrnpc
Q811L7	Heterogeneous nuclear ribonucleoprotein H1 OS=Mus musculus OX=10090 GN=Hnrnph1 PE=1 SV=2 - [Q811L7_MOUSE]	105.711	49.67	3	6	15	44	449	49.1684	6.30322	Hnrnph1
Q8CCK0	Core histone macro-H2A.2 OS=Mus musculus OX=10090 GN=Macroh2a2 PE=1 SV=3 - [H2AW_MOUSE]	101.867	40.86	6	11	13	41	372	40.0674	9.68604	Macroh2a2
P61979	Heterogeneous nuclear ribonucleoprotein K OS=Mus musculus OX=10090 GN=Hnrnpk PE=1 SV=1 - [HNRPK_MOUSE]	93.8168	50.54	16	1	19	41	463	50.9444	5.5415	Hnrnpk
Q9Z2X1	Heterogeneous nuclear ribonucleoprotein F OS=Mus musculus OX=10090 GN=Hnrnpf PE=1 SV=3 - [HNRPF_MOUSE]	87.803	62.41	6	13	15	42	415	45.7009	5.49072	Hnrnpf
P61979-3	Isoform 3 of Heterogeneous nuclear ribonucleoprotein K OS=Mus musculus OX=10090 GN=Hnrnpk - [HNRPK_MOUSE]	87.7378	47.84	12	1	19	40	439	48.4802	5.92236	Hnrnpk
A0A2I3BRL8	Predicted gene 7324 OS=Mus musculus OX=10090 GN=Gm7324 PE=4 SV=1 - [A0A2I3BRL8_MOUSE]	82.6004	41.75	3	4	18	47	388	42.1532	9.99365	Gm7324
P70333	Heterogeneous nuclear ribonucleoprotein H2 OS=Mus musculus OX=10090 GN=Hnrnph2 PE=1 SV=1 - [HNRH2_MOUSE]	77.355	53.01	2	8	16	33	449	49.2483	6.30322	Hnrnph2
P99024	Tubulin beta-5 chain OS=Mus musculus OX=10090 GN=Tubb5 PE=1 SV=1 - [TBB5_MOUSE]	75.8736	46.85	14	4	16	38	444	49.639	4.89404	Tubb5
P14733	Lamin-B1 OS=Mus musculus OX=10090 GN=Lmnb1 PE=1 SV=3 - [LMNB1_MOUSE]	70.3023	53.4	2	29	35	40	588	66.7448	5.16064	Lmnb1
Q564E8	60S ribosomal protein L4 OS=Mus musculus OX=10090 GN=Rpl4 PE=1 SV=1 - [Q564E8_MOUSE]	68.8936	45.58	3	20	20	27	419	47.124	11.0044	Rpl4
Q9WV02	RNA-binding motif protein, X chromosome OS=Mus musculus OX=10090 GN=Rbmx PE=1 SV=1 - [RBMX_MOUSE]	67.263	39.39	6	3	17	37	391	42.2754	10.0522	Rbmx
P27659	60S ribosomal protein L3 OS=Mus musculus OX=10090 GN=Rpl3 PE=1 SV=3 - [RL3_MOUSE]	66.6345	52.11	13	19	19	29	403	46.0808	10.2134	Rpl3
Q8C290	Uncharacterized protein OS=Mus musculus OX=10090 GN=Hnrnpu PE=2 SV=1 - [Q8C290_MOUSE]	66.2767	38.38	1	1	28	35	800	87.9228	6.23975	Hnrnpu
Q8VEK3-2	Isoform 2 of Heterogeneous nuclear ribonucleoprotein U OS=Mus musculus OX=10090 GN=Hnrnpu - [HNRPU_MOUSE]	65.8347	38.71	9	1	28	35	793	86.7513	5.92236	Hnrnpu
A0A2R8VHP3	Predicted pseudogene 5478 OS=Mus musculus OX=10090 GN=Gm5478 PE=1 SV=1 - [A0A2R8VHP3_MOUSE]	61.2127	12.9	2	3	9	30	535	57.8841	6.20166	Gm5478
Q3TIV3	Poly [ADP-ribose] polymerase OS=Mus musculus OX=10090 GN=Parp1 PE=2 SV=1 - [Q3TIV3_MOUSE]	60.7866	28.5	12	25	25	30	1014	112.64	8.95361	Parp1
P68372	Tubulin beta-4B chain OS=Mus musculus OX=10090 GN=Tubb4b PE=1 SV=1 - [TBB4B_MOUSE]	60.767	30.11	12	1	12	31	445	49.799	4.89404	Tubb4b
Q7TMM9	Tubulin beta-2A chain OS=Mus musculus OX=10090 GN=Tubb2a PE=1 SV=1 - [TBB2A_MOUSE]	59.22	30.79	11	2	12	31	445	49.875	4.89404	Tubb2a
Q8BV49	Pyrin and HIN domain-containing protein 1 OS=Mus musculus OX=10090 GN=Pyhin1 PE=1 SV=1 - [IFIX_MOUSE]	54.3436	46.43	13	15	16	30	420	46.8573	9.45166	Pyhin1
E9QNN1	DEAH box protein 9 OS=Mus musculus OX=10090 GN=Dhx9 PE=1 SV=1 - [E9QNN1_MOUSE]	53.6992	26.73	11	29	29	36	1384	149.596	6.82959	Dhx9
O88569-3	Isoform 3 of Heterogeneous nuclear ribonucleoproteins A2/B1 OS=Mus musculus OX=10090 GN=Hnrnpa2b1 - [ROA2_MOUSE]	51.2002	47.51	6	12	15	28	301	32.4404	8.71924	Hnrnpa2b1
B2RTP7	Krt2 protein OS=Mus musculus OX=10090 GN=Krt2 PE=2 SV=1 - [B2RTP7_MOUSE]	50.7281	12.02	3	8	14	34	707	70.8798	8.06006	Krt2
B2RRX1	Actin, beta OS=Mus musculus OX=10090 GN=Actb PE=2 SV=1 - [B2RRX1_MOUSE]	49.7023	54.4	33	6	14	24	375	41.7097	5.47803	Actb
Q3TII3	Elongation factor 1-alpha OS=Mus musculus OX=10090 GN=Eef1a1 PE=2 SV=1 - [Q3TII3_MOUSE]	48.4107	36.58	7	12	12	19	462	50.0721	9.01221	Eef1a1
Q3U6D2	Uncharacterized protein OS=Mus musculus OX=10090 GN=Rcc1 PE=2 SV=1 - [Q3U6D2_MOUSE]	47.2784	54.63	4	14	14	23	421	44.9157	8.104	Rcc1
Q9Z130	Heterogeneous nuclear ribonucleoprotein D-like OS=Mus musculus OX=10090 GN=Hnrnpdl PE=1 SV=1 - [HNRDL_MOUSE]	47.1854	13.62	4	2	4	25	301	33.5381	7.31299	Hnrnpdl
Q64131	Runt-related transcription factor 3 OS=Mus musculus OX=10090 GN=Runx3 PE=1 SV=3 - [RUNX3_MOUSE]	45.5632	42.3	5	9	11	22	409	43.4902	9.49561	Runx3
P05213	Tubulin alpha-1B chain OS=Mus musculus OX=10090 GN=Tuba1b PE=1 SV=2 - [TBA1B_MOUSE]	44.4615	53.22	4	0	19	23	451	50.1196	5.05908	Tuba1b
P68368	Tubulin alpha-4A chain OS=Mus musculus OX=10090 GN=Tuba4a PE=1 SV=1 - [TBA4A_MOUSE]	43.7467	49.11	6	3	18	21	448	49.8924	5.05908	Tuba4a
A0A0R4J0B4	CMP-N-acetylneuraminic acid synthase OS=Mus musculus OX=10090 GN=Cmas PE=1 SV=1 - [A0A0R4J0B4_MOUSE]	42.9664	48.38	5	17	17	20	432	47.9997	8.104	Cmas
Q3TEA8	Heterochromatin protein 1-binding protein 3 OS=Mus musculus OX=10090 GN=Hp1bp3 PE=1 SV=1 - [HP1B3_MOUSE]	42.9426	47.65	11	22	22	28	554	60.8291	9.70068	Hp1bp3
A0A0A6YWC8	Vimentin OS=Mus musculus OX=10090 GN=Vim PE=1 SV=1 - [A0A0A6YWC8_MOUSE]	42.1602	41.22	27	17	18	25	427	49.1627	5.12256	Vim
Q3TIZ0	Tubulin alpha chain OS=Mus musculus OX=10090 GN=Tuba1c PE=2 SV=1 - [Q3TIZ0_MOUSE]	41.5299	48.11	4	0	18	22	449	49.9075	5.09717	Tuba1c
P68369	Tubulin alpha-1A chain OS=Mus musculus OX=10090 GN=Tuba1a PE=1 SV=1 - [TBA1A_MOUSE]	40.4228	50.11	2	0	18	22	451	50.1036	5.05908	Tuba1a
B7ZWF1	RNA helicase OS=Mus musculus OX=10090 GN=Ddx3x PE=2 SV=1 - [B7ZWF1_MOUSE]	39.3698	31.47	9	18	19	22	661	73.027	7.18115	Ddx3x
E9Q557	Desmoplakin OS=Mus musculus OX=10090 GN=Dsp PE=1 SV=1 - [DESP_MOUSE]	38.8624	10.06	4	28	28	31	2883	332.706	6.80029	Dsp
Q5FW91	Tubulin alpha chain OS=Mus musculus OX=10090 GN=Tuba3a PE=1 SV=1 - [Q5FW91_MOUSE]	37.1817	44.67	2	1	16	19	450	49.9276	5.09717	Tuba3a
Q91VC3	Eukaryotic initiation factor 4A-III OS=Mus musculus OX=10090 GN=Eif4a3 PE=1 SV=3 - [IF4A3_MOUSE]	37.1703	50.61	5	14	16	20	411	46.8102	6.72705	Eif4a3
Q8C863-2	Isoform 2 of E3 ubiquitin-protein ligase Itchy OS=Mus musculus OX=10090 GN=Itch - [ITCH_MOUSE]	37.1238	18.58	13	8	8	17	759	86.648	6.34131	Itch
F8WJG3	Transformer-2 protein homolog beta OS=Mus musculus OX=10090 GN=Tra2b PE=1 SV=1 - [F8WJG3_MOUSE]	35.9994	47.34	3	7	8	16	188	21.9217	10.1548	Tra2b
Q61656	Probable ATP-dependent RNA helicase DDX5 OS=Mus musculus OX=10090 GN=Ddx5 PE=1 SV=2 - [DDX5_MOUSE]	35.664	31.92	12	13	18	22	614	69.2468	8.92432	Ddx5
Q3UMT7	Uncharacterized protein OS=Mus musculus OX=10090 GN=Hnrnpl PE=2 SV=1 - [Q3UMT7_MOUSE]	35.219	26.35	7	11	11	16	592	64.0351	7.53271	Hnrnpl
Q8BUM1	TAR DNA-binding protein 43 OS=Mus musculus OX=10090 GN=Tardbp PE=2 SV=1 - [Q8BUM1_MOUSE]	34.9064	39.53	22	11	11	16	301	33.6128	6.99072	Tardbp
Q3TNH0	Uncharacterized protein OS=Mus musculus OX=10090 GN=Tmpo PE=2 SV=1 - [Q3TNH0_MOUSE]	33.7129	47.09	11	16	16	17	412	46.022	9.21729	Tmpo
Q9Z2E1	Methyl-CpG-binding domain protein 2 OS=Mus musculus OX=10090 GN=Mbd2 PE=2 SV=2 - [MBD2_MOUSE]	33.1478	32.37	4	11	11	16	414	43.474	10.0376	Mbd2
Q8BIF9	Zinc finger protein 787 OS=Mus musculus OX=10090 GN=Znf787 PE=2 SV=3 - [ZN787_MOUSE]	31.8424	46.19	1	9	9	11	381	40.4517	8.23584	Znf787
Q3THB3	Uncharacterized protein OS=Mus musculus OX=10090 GN=Hnrnpm PE=1 SV=1 - [Q3THB3_MOUSE]	31.3819	27.68	13	17	17	18	690	73.6924	8.74854	Hnrnpm
Q3USZ5	Nop domain-containing protein (Fragment) OS=Mus musculus OX=10090 GN=Nop56 PE=2 SV=1 - [Q3USZ5_MOUSE]	30.2123	25.05	10	11	11	13	523	58.1388	8.89502	Nop56
P43274	Histone H1.4 OS=Mus musculus OX=10090 GN=H1-4 PE=1 SV=2 - [H14_MOUSE]	30.0656	27.85	3	3	8	13	219	21.964	11.1069	H1-4
Q71V06	Y box transcription factor (Fragment) OS=Mus musculus OX=10090 GN=Ybx1 PE=2 SV=1 - [Q71V06_MOUSE]	30.0527	43.81	19	8	8	10	299	33.5266	10.0376	Ybx1
Q9Z2D6	Methyl-CpG-binding protein 2 OS=Mus musculus OX=10090 GN=Mecp2 PE=1 SV=1 - [MECP2_MOUSE]	28.9454	32.85	4	14	14	15	484	52.2755	9.96436	Mecp2
Q3TI79	PUA domain-containing protein OS=Mus musculus OX=10090 GN=Dkc1 PE=2 SV=1 - [Q3TI79_MOUSE]	28.3734	28.88	7	10	10	13	509	57.4053	9.27588	Dkc1
E9Q7G0	Nuclear mitotic apparatus protein 1 OS=Mus musculus OX=10090 GN=Numa1 PE=1 SV=1 - [NUMA1_MOUSE]	26.9032	8.93	10	13	13	16	2094	235.487	5.87158	Numa1
F7B5B5	Heterogeneous nuclear ribonucleoprotein R OS=Mus musculus OX=10090 GN=Hnrnpr PE=1 SV=1 - [F7B5B5_MOUSE]	26.6914	34.46	12	12	16	21	531	59.5896	9.15869	Hnrnpr
P49312	Heterogeneous nuclear ribonucleoprotein A1 OS=Mus musculus OX=10090 GN=Hnrnpa1 PE=1 SV=2 - [ROA1_MOUSE]	26.6117	29.69	9	6	9	17	320	34.1753	9.23193	Hnrnpa1
A1L0X5	Krt78 protein (Fragment) OS=Mus musculus OX=10090 GN=Krt78 PE=2 SV=1 - [A1L0X5_MOUSE]	25.8414	4.27	6	2	3	11	492	54.7393	6.30322	Krt78
B7ZWB3	Skap1 protein OS=Mus musculus OX=10090 GN=Skap1 PE=2 SV=1 - [B7ZWB3_MOUSE]	25.6347	19.76	7	8	8	14	339	39.0956	4.48779	Skap1
B2CY77	Laminin receptor (Fragment) OS=Mus musculus OX=10090 GN=Rpsa PE=2 SV=1 - [B2CY77_MOUSE]	24.7246	39.66	4	8	8	12	295	32.8295	4.86865	Rpsa
Q501J6	Probable ATP-dependent RNA helicase DDX17 OS=Mus musculus OX=10090 GN=Ddx17 PE=1 SV=1 - [DDX17_MOUSE]	24.0529	17.23	7	5	10	12	650	72.354	8.5874	Ddx17
Q3U9G9	Delta(14)-sterol reductase LBR OS=Mus musculus OX=10090 GN=Lbr PE=1 SV=2 - [LBR_MOUSE]	23.7522	15.34	3	9	9	10	626	71.3945	9.36377	Lbr
Q9D903	Probable rRNA-processing protein EBP2 OS=Mus musculus OX=10090 GN=Ebna1bp2 PE=2 SV=1 - [EBP2_MOUSE]	23.0859	41.18	2	12	12	15	306	34.6812	10.0815	Ebna1bp2
Q9Z1R9	Protease, serine 1 (trypsin 1) OS=Mus musculus OX=10090 GN=Prss1 PE=1 SV=1 - [Q9Z1R9_MOUSE]	23.0401	9.76	1	2	2	43	246	26.1178	4.94482	Prss1
P68134	Actin, alpha skeletal muscle OS=Mus musculus OX=10090 GN=Acta1 PE=1 SV=1 - [ACTS_MOUSE]	22.888	36.07	23	3	11	16	377	42.0239	5.38916	Acta1
Q3TG93	Uncharacterized protein OS=Mus musculus OX=10090 GN=Ssb PE=2 SV=1 - [Q3TG93_MOUSE]	22.6905	33.01	7	14	14	19	415	47.697	9.77393	Ssb
B2RTM0	Histone H4 OS=Mus musculus OX=10090 GN=Hist2h4 PE=1 SV=1 - [B2RTM0_MOUSE]	22.2666	51.46	3	6	6	11	103	11.3604	11.356	Hist2h4
Q8C2Q3	RNA-binding protein 14 OS=Mus musculus OX=10090 GN=Rbm14 PE=1 SV=1 - [RBM14_MOUSE]	22.2584	25.11	8	12	15	16	669	69.406	9.67139	Rbm14
F7BGR7	Predicted gene 21992 OS=Mus musculus OX=10090 GN=Gm21992 PE=4 SV=1 - [F7BGR7_MOUSE]	22.2334	36.69	15	2	14	15	477	52.7579	7.29834	Gm21992
Q5SZA3	Histone cluster 1, H1c OS=Mus musculus OX=10090 GN=H1f2 PE=1 SV=1 - [Q5SZA3_MOUSE]	21.4837	29.72	4	4	8	10	212	21.2537	11.0044	H1f2
A0A0N4SVC2	Transformer-2 protein homolog alpha OS=Mus musculus OX=10090 GN=Tra2a PE=1 SV=1 - [A0A0N4SVC2_MOUSE]	20.3782	24.64	5	5	6	9	280	32.2399	11.2827	Tra2a
Q00PI9	Heterogeneous nuclear ribonucleoprotein U-like protein 2 OS=Mus musculus OX=10090 GN=Hnrnpul2 PE=1 SV=2 - [HNRL2_MOUSE]	20.2056	17.45	1	12	12	14	745	84.8878	4.89404	Hnrnpul2
P09405	Nucleolin OS=Mus musculus OX=10090 GN=Ncl PE=1 SV=2 - [NUCL_MOUSE]	19.6675	17.96	7	12	12	12	707	76.6768	4.75439	Ncl
Q8BVK9	Sp110 nuclear body protein OS=Mus musculus OX=10090 GN=Sp110 PE=1 SV=1 - [SP110_MOUSE]	19.5733	26.29	4	10	10	11	445	50.1092	9.86182	Sp110
A0A0N4SV66	Histone H2A OS=Mus musculus OX=10090 GN=H2aj PE=1 SV=1 - [A0A0N4SV66_MOUSE]	18.8828	20.63	16	1	2	5	126	13.6517	11.019	H2aj
Q8K2L4	RNA helicase (Fragment) OS=Mus musculus OX=10090 GN=Ddx21 PE=1 SV=1 - [Q8K2L4_MOUSE]	18.7515	18.87	5	12	12	13	689	75.8083	9.30518	Ddx21
F6QKD2	RNA helicase (Fragment) OS=Mus musculus OX=10090 GN=Ddx47 PE=1 SV=1 - [F6QKD2_MOUSE]	18.4111	28.33	9	9	9	11	360	39.9983	8.85107	Ddx47
Q3UXI9	DZF domain-containing protein OS=Mus musculus OX=10090 GN=Ilf2 PE=2 SV=1 - [Q3UXI9_MOUSE]	18.1746	40.26	2	11	11	12	390	42.9832	5.13525	Ilf2
Q3TLL6	RNA helicase OS=Mus musculus OX=10090 GN=Eif4a1 PE=2 SV=1 - [Q3TLL6_MOUSE]	17.8266	37.64	16	10	12	16	364	41.4641	5.52881	Eif4a1
Q9DCA5	Ribosome biogenesis protein BRX1 homolog OS=Mus musculus OX=10090 GN=Brix1 PE=1 SV=3 - [BRX1_MOUSE]	17.5215	28.61	2	8	8	8	353	41.2149	10.0229	Brix1
P60335	Poly(rC)-binding protein 1 OS=Mus musculus OX=10090 GN=Pcbp1 PE=1 SV=1 - [PCBP1_MOUSE]	17.4296	28.93	12	6	8	9	356	37.4739	7.09326	Pcbp1
Q3TTX0	Uncharacterized protein OS=Mus musculus OX=10090 GN=Matr3 PE=2 SV=1 - [Q3TTX0_MOUSE]	17.4211	13.83	17	9	9	11	846	94.5578	6.25244	Matr3
Q922P9	Putative oxidoreductase GLYR1 OS=Mus musculus OX=10090 GN=Glyr1 PE=1 SV=1 - [GLYR1_MOUSE]	16.624	18.13	2	7	7	9	546	59.6776	9.21729	Glyr1
Q3TXT7	RuvB-like helicase OS=Mus musculus OX=10090 GN=Ruvbl2 PE=1 SV=1 - [Q3TXT7_MOUSE]	15.6095	24.19	6	9	9	9	463	51.0805	5.64307	Ruvbl2
Q3V1X4	Uncharacterized protein OS=Mus musculus OX=10090 GN=Surf6 PE=2 SV=1 - [Q3V1X4_MOUSE]	15.5651	25.92	2	11	11	13	355	41.2095	10.521	Surf6
Q02257	Junction plakoglobin OS=Mus musculus OX=10090 GN=Jup PE=1 SV=3 - [PLAK_MOUSE]	15.458	17.05	6	11	11	14	745	81.7488	6.13818	Jup
Q8BGA5	KRR1 small subunit processome component homolog OS=Mus musculus OX=10090 GN=Krr1 PE=2 SV=1 - [KRR1_MOUSE]	15.272	28.95	3	9	9	9	380	43.5106	9.78857	Krr1
Q99JY3	GTPase IMAP family member 4 OS=Mus musculus OX=10090 GN=Gimap4 PE=1 SV=2 - [GIMA4_MOUSE]	15.1173	36.28	6	10	10	10	328	38.0204	6.22705	Gimap4
A0A494B9W4	RNA-binding protein 4B (Fragment) OS=Mus musculus OX=10090 GN=Rbm4b PE=1 SV=1 - [A0A494B9W4_MOUSE]	15.0514	38.25	10	1	10	11	285	32.0495	6.59521	Rbm4b
Q3TNN6	Macrophage-capping protein OS=Mus musculus OX=10090 GN=Capg PE=2 SV=1 - [Q3TNN6_MOUSE]	14.8266	22.35	9	6	6	8	349	38.6907	7.1958	Capg
A0JLV3	Histone H2B (Fragment) OS=Mus musculus OX=10090 GN=Hist1h2bj PE=2 SV=1 - [A0JLV3_MOUSE]	14.8123	34.96	19	5	5	7	123	13.5704	10.3892	Hist1h2bj
Q08288	Cell growth-regulating nucleolar protein OS=Mus musculus OX=10090 GN=Lyar PE=1 SV=2 - [LYAR_MOUSE]	14.7434	16.75	21	5	5	7	388	43.7085	9.49561	Lyar
Q8K4Q6	Endonuclease 8-like 1 OS=Mus musculus OX=10090 GN=Neil1 PE=2 SV=3 - [NEIL1_MOUSE]	13.7063	20.31	3	8	8	8	389	43.5587	9.83252	Neil1
Q3TFP0	Serine/arginine-rich-splicing factor 10 OS=Mus musculus OX=10090 GN=Srsf10 PE=1 SV=1 - [Q3TFP0_MOUSE]	13.516	24.73	9	4	4	5	182	22.1219	10.3306	Srsf10
Q60972	Histone-binding protein RBBP4 OS=Mus musculus OX=10090 GN=Rbbp4 PE=1 SV=5 - [RBBP4_MOUSE]	13.5098	18.12	1	3	6	7	425	47.6261	4.89404	Rbbp4
V9GX38	Predicted gene 17190 OS=Mus musculus OX=10090 GN=Gm17190 PE=1 SV=1 - [V9GX38_MOUSE]	13.4311	9.8	2	1	5	12	357	37.7029	8.85107	Gm17190
Q921W2	Nucleolysin TIAR OS=Mus musculus OX=10090 GN=Tial1 PE=1 SV=1 - [Q921W2_MOUSE]	13.0433	28	12	4	6	6	375	41.5041	7.73779	Tial1
Q3UKV4	Uncharacterized protein OS=Mus musculus OX=10090 GN=Dpf2 PE=2 SV=1 - [Q3UKV4_MOUSE]	12.8219	22.76	5	7	7	7	391	44.3003	6.60986	Dpf2
P21619	Lamin-B2 OS=Mus musculus OX=10090 GN=Lmnb2 PE=1 SV=2 - [LMNB2_MOUSE]	12.7618	13.26	3	4	10	10	596	67.2773	5.50342	Lmnb2
P42669	Transcriptional activator protein Pur-alpha OS=Mus musculus OX=10090 GN=Pura PE=1 SV=1 - [PURA_MOUSE]	12.5983	30.53	7	7	8	8	321	34.8624	6.44287	Pura
Q99J79	DNA damage-binding protein 2 OS=Mus musculus OX=10090 GN=Ddb2 PE=1 SV=1 - [DDB2_MOUSE]	12.4549	29.4	3	10	10	10	432	48.3446	9.17334	Ddb2
Q8VIJ6	Splicing factor, proline- and glutamine-rich OS=Mus musculus OX=10090 GN=Sfpq PE=1 SV=1 - [SFPQ_MOUSE]	12.3668	9.73	5	4	5	5	699	75.3943	9.43701	Sfpq
Q6F4J0	Tubulin gamma chain OS=Mus musculus OX=10090 GN=Tubg2 PE=2 SV=1 - [Q6F4J0_MOUSE]	12.329	19.07	2	5	5	7	451	51.0897	6.21436	Tubg2
A2AU61	RNA-binding protein Raly (Fragment) OS=Mus musculus OX=10090 GN=Raly PE=1 SV=1 - [A2AU61_MOUSE]	12.1813	26.54	6	6	6	7	211	23.1057	10.4917	Raly
Q1WWK3	Hist1h1b protein (Fragment) OS=Mus musculus OX=10090 GN=H1f5 PE=2 SV=1 - [Q1WWK3_MOUSE]	12.094	29.73	2	4	6	7	222	22.4314	10.9165	H1f5
Q8BQ09	Runt-related transcription factor OS=Mus musculus OX=10090 GN=Runx1 PE=2 SV=1 - [Q8BQ09_MOUSE]	12.0763	24.93	10	5	6	8	353	37.8237	8.77783	Runx1
Q04750	DNA topoisomerase 1 OS=Mus musculus OX=10090 GN=Top1 PE=1 SV=2 - [TOP1_MOUSE]	12.0148	15.12	3	10	10	10	767	90.8189	9.33447	Top1
Q64511	DNA topoisomerase 2-beta OS=Mus musculus OX=10090 GN=Top2b PE=1 SV=2 - [TOP2B_MOUSE]	11.8342	9.24	7	14	14	15	1612	181.795	8.29443	Top2b
A0A0A0MQ76	Nucleolar protein 58 OS=Mus musculus OX=10090 GN=Nop58 PE=1 SV=1 - [A0A0A0MQ76_MOUSE]	11.644	20.72	6	7	7	10	444	50.0316	9.42236	Nop58
G5E8H3	DNA-binding protein Ikaros OS=Mus musculus OX=10090 GN=Ikzf1 PE=1 SV=1 - [G5E8H3_MOUSE]	11.3456	12.62	21	4	5	6	515	57.165	6.49365	Ikzf1
Q60749	KH domain-containing, RNA-binding, signal transduction-associated protein 1 OS=Mus musculus OX=10090 GN=Khdrbs1 PE=1 SV=2 - [KHDR1_MOUSE]	11.1724	16.25	5	5	6	6	443	48.3404	8.71924	Khdrbs1
Q546G4	Serum albumin OS=Mus musculus OX=10090 GN=Alb PE=1 SV=1 - [Q546G4_MOUSE]	11.0551	7.57	1	4	4	8	608	68.6477	6.07471	Alb
Q3UND0-2	Isoform 2 of Src kinase-associated phosphoprotein 2 OS=Mus musculus OX=10090 GN=Skap2 - [SKAP2_MOUSE]	10.7401	37.89	3	10	10	10	351	39.9252	4.7417	Skap2
A5JUZ1	Ubiqutin subunit 1 (Fragment) OS=Mus musculus OX=10090 GN=Ubc PE=2 SV=1 - [A5JUZ1_MOUSE]	10.5901	61.84	18	4	4	10	76	8.55962	7.25439	Ubc
Q7TNV0	Protein DEK OS=Mus musculus OX=10090 GN=Dek PE=1 SV=1 - [DEK_MOUSE]	10.5114	13.68	6	5	5	5	380	43.132	6.85889	Dek
Q569U6	Transcription factor jun-B OS=Mus musculus OX=10090 GN=Junb PE=1 SV=1 - [Q569U6_MOUSE]	10.2534	31.98	4	8	8	9	344	35.7431	9.21729	Junb
Q3TLF6	Uncharacterized protein OS=Mus musculus OX=10090 GN=Mybbp1a PE=2 SV=1 - [Q3TLF6_MOUSE]	10.1757	11.55	3	6	6	6	736	82.3592	9.84717	Mybbp1a
A0A0U1RQA1	Septin-1 (Fragment) OS=Mus musculus OX=10090 GN=Septin1 PE=1 SV=2 - [A0A0U1RQA1_MOUSE]	10.1703	18.9	5	6	6	6	328	37.3492	7.7085	Septin1
Q8CD20	Protein kinase domain-containing protein OS=Mus musculus OX=10090 GN=Csnk2a1 PE=2 SV=1 - [Q8CD20_MOUSE]	9.81304	19.35	6	3	3	4	248	29.4858	7.94287	Csnk2a1
Q99J72-3	Isoform 3 of DNA dC->dU-editing enzyme APOBEC-3 OS=Mus musculus OX=10090 GN=Apobec3 - [ABEC3_MOUSE]	9.71911	11.99	23	4	4	6	392	46.9397	9.29053	Apobec3
O35326	Serine/arginine-rich splicing factor 5 OS=Mus musculus OX=10090 GN=Srsf5 PE=1 SV=2 - [SRSF5_MOUSE]	9.53994	16.36	3	4	4	4	269	30.8731	11.561	Srsf5
Q3TQW3	Polypyrimidine tract-binding protein 1 OS=Mus musculus OX=10090 GN=Ptbp1 PE=2 SV=1 - [Q3TQW3_MOUSE]	9.41523	18.85	23	4	6	7	520	55.5086	8.89502	Ptbp1
Q7TND5	Ribosome production factor 1 OS=Mus musculus OX=10090 GN=Rpf1 PE=2 SV=2 - [RPF1_MOUSE]	9.33959	18.34	3	4	4	4	349	40.0121	9.99365	Rpf1
Q542G9	Annexin OS=Mus musculus OX=10090 GN=Anxa2 PE=1 SV=1 - [Q542G9_MOUSE]	9.22321	25.07	7	7	7	7	339	38.6518	7.69385	Anxa2
Q8BIG4	F-box only protein 28 OS=Mus musculus OX=10090 GN=Fbxo28 PE=1 SV=1 - [FBX28_MOUSE]	8.97832	11.68	2	5	5	5	368	40.9522	9.53955	Fbxo28
G3UZ48	Heterogeneous nuclear ribonucleoprotein Q OS=Mus musculus OX=10090 GN=Syncrip PE=1 SV=1 - [G3UZ48_MOUSE]	8.96144	21.55	10	6	10	10	464	52.0302	9.15869	Syncrip
Q45VK5	Interleukin enhancer-binding factor 3 OS=Mus musculus OX=10090 GN=Ilf3 PE=1 SV=1 - [Q45VK5_MOUSE]	8.9312	8.25	10	5	5	5	703	76.2999	7.75244	Ilf3
A2NU19	VH coding region (Fragment) OS=Mus musculus OX=10090 PE=4 SV=1 - [A2NU19_MOUSE]	8.90379	9.24	10	1	1	3	119	13.5078	8.29443	4
O88895	Histone deacetylase 3 OS=Mus musculus OX=10090 GN=Hdac3 PE=1 SV=1 - [HDAC3_MOUSE]	8.82068	14.15	10	5	5	5	424	48.3332	5.26221	Hdac3
Q3TWW8	Serine/arginine-rich splicing factor 6 OS=Mus musculus OX=10090 GN=Srsf6 PE=1 SV=1 - [SRSF6_MOUSE]	8.79525	13.57	6	4	4	7	339	39.0021	11.4585	Srsf6
Q60973	Histone-binding protein RBBP7 OS=Mus musculus OX=10090 GN=Rbbp7 PE=1 SV=1 - [RBBP7_MOUSE]	8.78716	18.12	8	3	6	6	425	47.7602	5.04639	Rbbp7
D3Z4U0	Zinc finger Ran-binding domain-containing protein 2 OS=Mus musculus OX=10090 GN=Zranb2 PE=1 SV=2 - [D3Z4U0_MOUSE]	8.53889	15.31	7	5	5	6	320	36.2595	9.67139	Zranb2
B2RUM8	RNA helicase OS=Mus musculus OX=10090 GN=Ddx18 PE=1 SV=1 - [B2RUM8_MOUSE]	8.3453	8.64	1	5	5	5	660	74.1343	9.5249	Ddx18
Q61495	Desmoglein-1-alpha OS=Mus musculus OX=10090 GN=Dsg1a PE=2 SV=2 - [DSG1A_MOUSE]	8.23911	3.78	5	4	4	5	1057	114.525	4.89404	Dsg1a
A2BE93	Protein SET (Fragment) OS=Mus musculus OX=10090 GN=Set PE=1 SV=1 - [A2BE93_MOUSE]	8.12264	26.51	7	5	5	5	215	24.9085	5.5542	Set
Q9DC33	High mobility group protein 20A OS=Mus musculus OX=10090 GN=Hmg20a PE=1 SV=1 - [HM20A_MOUSE]	8.01943	18.21	4	7	7	8	346	39.893	6.40479	Hmg20a
A0A0R4J0R3	Interferon-stimulated 20 kDa exonuclease-like 2 OS=Mus musculus OX=10090 GN=Isg20l2 PE=1 SV=1 - [A0A0R4J0R3_MOUSE]	7.95082	20.11	4	6	6	6	368	40.9659	9.979	Isg20l2
Q80X41-2	Isoform 2 of Serine/threonine-protein kinase VRK1 OS=Mus musculus OX=10090 GN=Vrk1 - [VRK1_MOUSE]	7.82881	13.64	7	5	5	5	396	45.0031	8.98291	Vrk1
P48678-2	Isoform C of Prelamin-A/C OS=Mus musculus OX=10090 GN=Lmna - [LMNA_MOUSE]	7.72532	9.06	4	4	6	6	574	65.4067	6.80029	Lmna
Q8CJF7	Protein ELYS OS=Mus musculus OX=10090 GN=Ahctf1 PE=1 SV=1 - [ELYS_MOUSE]	7.32842	2.63	3	4	4	4	2243	247.493	6.55127	Ahctf1
B2RTE3	Pre-mRNA-splicing factor 38A OS=Mus musculus OX=10090 GN=Prpf38a PE=2 SV=1 - [B2RTE3_MOUSE]	7.05804	19.87	2	6	6	6	312	37.4134	10.0083	Prpf38a
Q8CII5	Nucleolysin TIA-1 OS=Mus musculus OX=10090 GN=Tia1 PE=1 SV=1 - [Q8CII5_MOUSE]	6.83417	16.14	9	1	3	3	285	31.5603	8.29443	Tia1
Q8QZY9	Splicing factor 3B subunit 4 OS=Mus musculus OX=10090 GN=Sf3b4 PE=1 SV=1 - [SF3B4_MOUSE]	6.63375	7.31	1	2	2	2	424	44.3271	8.55811	Sf3b4
A0A4E9FT70	IgG3 (Fragment) OS=Mus musculus OX=10090 GN=IGHG3 PE=4 SV=1 - [A0A4E9FT70_MOUSE]	6.59506	9.57	5	3	3	4	376	41.1893	7.89893	IGHG3
Q922I0	U2 snRNP auxiliary factor large subunit OS=Mus musculus OX=10090 GN=U2af2 PE=2 SV=1 - [Q922I0_MOUSE]	6.45762	11.11	5	3	3	3	306	33.7489	5.03369	U2af2
B9EIV6	PML-RAR alpha-regulated adaptor molecule 1 OS=Mus musculus OX=10090 GN=Pram1 PE=2 SV=1 - [B9EIV6_MOUSE]	6.44641	5.48	2	3	3	5	675	75.4172	9.61279	Pram1
D3Z3F1	FIP1-like 1 protein (Fragment) OS=Mus musculus OX=10090 GN=Fip1l1 PE=1 SV=2 - [D3Z3F1_MOUSE]	6.4007	9.45	5	4	4	4	434	46.4218	4.7417	Fip1l1
Q9R226	KH domain-containing, RNA-binding, signal transduction-associated protein 3 OS=Mus musculus OX=10090 GN=Khdrbs3 PE=1 SV=1 - [KHDR3_MOUSE]	6.30235	14.45	5	4	5	5	346	38.7836	8.104	Khdrbs3
Q3TGW0	Actin-like protein 3 OS=Mus musculus OX=10090 GN=Actr3 PE=2 SV=1 - [Q3TGW0_MOUSE]	6.24642	9.57	8	4	4	5	418	47.346	5.92236	Actr3
P53395	Lipoamide acyltransferase component of branched-chain alpha-keto acid dehydrogenase complex, mitochondrial OS=Mus musculus OX=10090 GN=Dbt PE=1 SV=2 - [ODB2_MOUSE]	6.18722	10.79	3	5	5	5	482	53.2129	8.60205	Dbt
Q91ZW3	SWI/SNF-related matrix-associated actin-dependent regulator of chromatin subfamily A member 5 OS=Mus musculus OX=10090 GN=Smarca5 PE=1 SV=1 - [SMCA5_MOUSE]	6.18208	8.09	8	9	9	9	1051	121.55	8.14795	Smarca5
A0A494BAM2	RNA 3'-terminal phosphate cyclase-like protein OS=Mus musculus OX=10090 GN=Rcl1 PE=1 SV=1 - [A0A494BAM2_MOUSE]	6.17697	15.73	3	4	4	4	337	36.7244	8.99756	Rcl1
F7AA45	RNA-binding protein 39 (Fragment) OS=Mus musculus OX=10090 GN=Rbm39 PE=1 SV=1 - [F7AA45_MOUSE]	6.13282	16.72	8	4	4	4	311	33.917	5.14795	Rbm39
Q9CYH6	Ribosome biogenesis regulatory protein homolog OS=Mus musculus OX=10090 GN=Rrs1 PE=1 SV=1 - [RRS1_MOUSE]	6.08978	9.86	2	5	5	6	365	41.5264	10.77	Rrs1
Q61635	GTP-binding protein OS=Mus musculus OX=10090 GN=Ifi47 PE=1 SV=1 - [Q61635_MOUSE]	5.97767	18.33	17	7	7	8	420	46.7553	6.7417	Ifi47
Q3U876	Uncharacterized protein OS=Mus musculus OX=10090 GN=Sp100 PE=2 SV=1 - [Q3U876_MOUSE]	5.91057	8.41	15	4	4	4	464	52.5513	8.35303	Sp100
Q8BKJ9	NAD-dependent protein deacetylase sirtuin-7 OS=Mus musculus OX=10090 GN=Sirt7 PE=1 SV=2 - [SIR7_MOUSE]	5.85104	12.69	4	4	4	5	402	45.1175	9.5835	Sirt7
Q8VDM6-2	Isoform 2 of Heterogeneous nuclear ribonucleoprotein U-like protein 1 OS=Mus musculus OX=10090 GN=Hnrnpul1 - [HNRL1_MOUSE]	5.73033	7.11	3	5	5	5	759	84.9932	8.646	Hnrnpul1
Q3TZS0	GATA-binding factor 3 OS=Mus musculus OX=10090 GN=Gata3 PE=2 SV=1 - [Q3TZS0_MOUSE]	5.69395	10.54	4	3	3	3	408	44.0115	9.49561	Gata3
D3YUB9	Polyadenylate-binding protein 2 (Fragment) OS=Mus musculus OX=10090 GN=Pabpn1 PE=1 SV=2 - [D3YUB9_MOUSE]	5.56234	15.24	7	2	2	3	164	18.2139	5.07178	Pabpn1
Q8K409	DNA polymerase beta OS=Mus musculus OX=10090 GN=Polb PE=1 SV=3 - [DPOLB_MOUSE]	5.51199	16.72	2	6	6	7	335	38.2638	8.85107	Polb
O35295	Transcriptional activator protein Pur-beta OS=Mus musculus OX=10090 GN=Purb PE=1 SV=3 - [PURB_MOUSE]	5.48803	10.19	8	2	3	3	324	33.8808	5.42725	Purb
P43275	Histone H1.1 OS=Mus musculus OX=10090 GN=H1-1 PE=1 SV=2 - [H11_MOUSE]	5.40888	14.08	1	1	3	3	213	21.7719	10.9312	H1-1
Q8C570	mRNA export factor OS=Mus musculus OX=10090 GN=Rae1 PE=1 SV=1 - [RAE1L_MOUSE]	5.38113	11.41	3	4	4	4	368	40.9389	7.82568	Rae1
O54864	Histone-lysine N-methyltransferase SUV39H1 OS=Mus musculus OX=10090 GN=Suv39h1 PE=1 SV=1 - [SUV91_MOUSE]	5.3588	7.28	4	3	3	3	412	47.7236	8.00146	Suv39h1
A1L3B6	Nol7 protein OS=Mus musculus OX=10090 GN=Nol7 PE=2 SV=1 - [A1L3B6_MOUSE]	5.2893	8.27	2	2	2	2	254	28.9523	9.61279	Nol7
Q8BHS3	Pre-mRNA-splicing factor RBM22 OS=Mus musculus OX=10090 GN=Rbm22 PE=1 SV=1 - [RBM22_MOUSE]	5.22531	10.24	1	4	4	5	420	46.8654	8.54346	Rbm22
Q61649	Alpha-globin mRNA (Fragment) OS=Mus musculus OX=10090 PE=2 SV=1 - [Q61649_MOUSE]	5.11383	41.38	10	2	2	5	58	6.21203	7.51807	2
P27661	Histone H2AX OS=Mus musculus OX=10090 GN=H2ax PE=1 SV=2 - [H2AX_MOUSE]	5.0473	20.98	6	1	2	2	143	15.1334	10.7407	H2ax
A0A5K1VVQ7	Transcription factor 7 OS=Mus musculus OX=10090 GN=Tcf7 PE=1 SV=1 - [A0A5K1VVQ7_MOUSE]	4.8379	7.88	32	2	2	2	419	45.2957	7.7085	Tcf7
F6TRA6	Runt-related transcription factor 2 (Fragment) OS=Mus musculus OX=10090 GN=Runx2 PE=1 SV=1 - [F6TRA6_MOUSE]	4.73293	23.81	16	1	4	5	231	25.2265	7.91357	Runx2
Q9Z1N5	Spliceosome RNA helicase Ddx39b OS=Mus musculus OX=10090 GN=Ddx39b PE=1 SV=1 - [DX39B_MOUSE]	4.66042	13.08	13	5	5	5	428	49.004	5.66846	Ddx39b
P56480	ATP synthase subunit beta, mitochondrial OS=Mus musculus OX=10090 GN=Atp5f1b PE=1 SV=2 - [ATPB_MOUSE]	4.65876	4.91	1	2	2	3	529	56.2655	5.33838	Atp5f1b
E0CZ27	Histone H3 (Fragment) OS=Mus musculus OX=10090 GN=H3f3a PE=3 SV=1 - [E0CZ27_MOUSE]	4.57793	13.45	11	2	2	2	119	13.3144	11.019	H3f3a
Q8BGC0	HIV Tat-specific factor 1 homolog OS=Mus musculus OX=10090 GN=Htatsf1 PE=1 SV=1 - [HTSF1_MOUSE]	4.5486	5.15	1	3	3	3	757	86.1876	4.39893	Htatsf1
Q3UW32	LRRcap domain-containing protein (Fragment) OS=Mus musculus OX=10090 GN=Anp32b PE=2 SV=1 - [Q3UW32_MOUSE]	4.54679	15.73	7	3	3	3	248	28.2679	3.99268	Anp32b
Q4FZK2	Elongation factor 1-gamma OS=Mus musculus OX=10090 GN=Eef1g PE=1 SV=1 - [Q4FZK2_MOUSE]	4.53987	8.7	2	3	3	3	437	50.0292	6.7417	Eef1g
Q9CSF9	Uncharacterized protein (Fragment) OS=Mus musculus OX=10090 GN=Rsl1d1 PE=2 SV=1 - [Q9CSF9_MOUSE]	4.5117	9.78	9	3	3	3	368	41.3594	9.86182	Rsl1d1
A0A0J9YUD8	High mobility group protein B1 OS=Mus musculus OX=10090 GN=Hmgb1 PE=1 SV=1 - [A0A0J9YUD8_MOUSE]	4.48852	16.96	13	2	2	2	171	19.7611	9.71533	Hmgb1
A0A087WQ51	Zinc finger protein Helios OS=Mus musculus OX=10090 GN=Ikzf2 PE=1 SV=1 - [A0A087WQ51_MOUSE]	4.47687	4.2	13	1	2	2	452	51.1331	6.45557	Ikzf2
Q8BYH6	Helicase ATP-binding domain-containing protein OS=Mus musculus OX=10090 GN=Snrnp200 PE=2 SV=1 - [Q8BYH6_MOUSE]	4.4208	5.22	2	3	3	3	690	78.9808	5.10986	Snrnp200
Q3TXY3	Uncharacterized protein OS=Mus musculus OX=10090 GN=Tmem201 PE=2 SV=1 - [Q3TXY3_MOUSE]	4.39006	12.36	6	4	4	4	348	39.2447	8.47021	Tmem201
P35550	rRNA 2'-O-methyltransferase fibrillarin OS=Mus musculus OX=10090 GN=Fbl PE=1 SV=2 - [FBRL_MOUSE]	4.32645	20.18	4	5	5	5	327	34.2857	10.2427	Fbl
A2AWT6	Nucleolar transcription factor 1 OS=Mus musculus OX=10090 GN=Ubtf PE=1 SV=1 - [A2AWT6_MOUSE]	4.26115	10.04	9	6	6	6	727	84.9568	5.5542	Ubtf
Q4KL82	Replication factor C (Activator 1) 2 OS=Mus musculus OX=10090 GN=Rfc2 PE=1 SV=1 - [Q4KL82_MOUSE]	4.25792	9.17	3	3	3	3	349	38.6999	6.44287	Rfc2
S4R257	Glyceraldehyde-3-phosphate dehydrogenase (Fragment) OS=Mus musculus OX=10090 GN=Gapdh PE=1 SV=1 - [S4R257_MOUSE]	4.25694	12.86	8	2	2	3	280	29.9203	8.35303	Gapdh
Q58E59	Splicing factor 3a, subunit 3 OS=Mus musculus OX=10090 GN=Sf3a3 PE=1 SV=1 - [Q58E59_MOUSE]	4.25523	5.59	1	3	3	3	501	58.8052	5.33838	Sf3a3
Q8BK67	Protein RCC2 OS=Mus musculus OX=10090 GN=Rcc2 PE=1 SV=1 - [RCC2_MOUSE]	4.24477	4.81	2	2	2	2	520	55.9481	8.71924	Rcc2
A8DUK4	Beta-globin OS=Mus musculus OX=10090 GN=Hbb-bs PE=1 SV=1 - [A8DUK4_MOUSE]	4.24379	23.81	26	3	3	3	147	15.7382	7.69385	Hbb-bs
Q8C1Y3	H15 domain-containing protein OS=Mus musculus OX=10090 GN=H1f0 PE=2 SV=1 - [Q8C1Y3_MOUSE]	4.21193	12.85	3	2	2	2	179	19.2412	10.228	H1f0
Q9QXV1	Chromobox protein homolog 8 OS=Mus musculus OX=10090 GN=Cbx8 PE=1 SV=1 - [CBX8_MOUSE]	4.20523	11.33	2	3	3	3	362	39.8358	9.93506	Cbx8
O54734	Dolichyl-diphosphooligosaccharide--protein glycosyltransferase 48 kDa subunit OS=Mus musculus OX=10090 GN=Ddost PE=1 SV=2 - [OST48_MOUSE]	4.19477	8.16	3	3	3	3	441	48.997	5.8335	Ddost
O08900	Zinc finger protein Aiolos OS=Mus musculus OX=10090 GN=Ikzf3 PE=1 SV=2 - [IKZF3_MOUSE]	4.17809	4.93	9	1	2	2	507	57.9298	6.32861	Ikzf3
Q91VE6-2	Isoform 2 of MKI67 FHA domain-interacting nucleolar phosphoprotein OS=Mus musculus OX=10090 GN=Nifk - [MK67I_MOUSE]	4.16878	8.55	2	2	2	2	269	30.6264	10.1987	Nifk
Q5M9N9	Prdx2 protein OS=Mus musculus OX=10090 GN=Prdx2 PE=2 SV=1 - [Q5M9N9_MOUSE]	4.15604	5.56	2	1	1	2	198	21.7771	5.41455	Prdx2
Q62347	Cyclic AMP-responsive element-binding protein 1 OS=Mus musculus OX=10090 GN=Creb1 PE=1 SV=1 - [Q62347_MOUSE]	4.09286	10.45	29	3	3	3	287	30.9409	6.3667	Creb1
E9QAG2	PHD finger protein 6 OS=Mus musculus OX=10090 GN=Phf6 PE=1 SV=1 - [E9QAG2_MOUSE]	4.06704	18.58	3	5	5	5	323	36.3427	9.02686	Phf6
Q3UDS0	Uncharacterized protein (Fragment) OS=Mus musculus OX=10090 GN=Hspa8 PE=2 SV=1 - [Q3UDS0_MOUSE]	4.05672	13.02	42	5	5	5	553	60.7644	6.40479	Hspa8
P21550	Beta-enolase OS=Mus musculus OX=10090 GN=Eno3 PE=1 SV=3 - [ENOB_MOUSE]	4.02975	7.6	20	2	2	2	434	46.9953	7.18115	Eno3
Q792Z1	Trypsin 10 OS=Mus musculus OX=10090 GN=Try10 PE=1 SV=1 - [Q792Z1_MOUSE]	3.98428	4.07	2	1	1	2	246	26.2039	5.8335	Try10
D6RGM1	Replication factor C subunit 4 (Fragment) OS=Mus musculus OX=10090 GN=Rfc4 PE=1 SV=2 - [D6RGM1_MOUSE]	3.95012	8.15	3	2	2	2	233	25.8077	9.23193	Rfc4
Q3UL50	WD repeat-containing protein 74 OS=Mus musculus OX=10090 GN=Wdr74 PE=1 SV=1 - [Q3UL50_MOUSE]	3.93248	7.06	3	2	2	3	340	37.7682	7.60596	Wdr74
A0A2R8VI25	Poly(rC)-binding protein 2 OS=Mus musculus OX=10090 GN=Pcbp2 PE=1 SV=1 - [A0A2R8VI25_MOUSE]	3.91026	13.92	40	2	4	5	316	33.2782	8.23584	Pcbp2
G3UXT7	RNA-binding protein FUS (Fragment) OS=Mus musculus OX=10090 GN=Fus PE=1 SV=1 - [G3UXT7_MOUSE]	3.89516	19.23	8	3	3	3	130	13.9986	8.96826	Fus
Q543N4	Uncharacterized protein OS=Mus musculus OX=10090 GN=Bysl PE=2 SV=1 - [Q543N4_MOUSE]	3.84704	5.61	2	2	2	2	303	34.8346	9.15869	Bysl
A0A3Q4EH04	Serine/arginine-rich-splicing factor 7 OS=Mus musculus OX=10090 GN=Srsf7 PE=1 SV=1 - [A0A3Q4EH04_MOUSE]	3.83421	25.55	7	2	3	3	137	15.7528	9.80322	Srsf7
Q3TPJ4	Nucleolar GTP-binding protein 1 (Fragment) OS=Mus musculus OX=10090 GN=Gtpbp4 PE=2 SV=1 - [Q3TPJ4_MOUSE]	3.77752	2.25	3	1	1	2	445	52.0742	8.67529	Gtpbp4
A0A0G2JG10	Pre-mRNA-splicing factor ATP-dependent RNA helicase DHX15 OS=Mus musculus OX=10090 GN=Dhx15 PE=1 SV=1 - [A0A0G2JG10_MOUSE]	3.7719	5.92	6	3	3	3	608	68.5348	6.80029	Dhx15
Q3TL53	40S ribosomal protein S6 OS=Mus musculus OX=10090 PE=2 SV=1 - [Q3TL53_MOUSE]	3.76173	8.03	3	2	2	2	249	28.6639	10.77	2
A2A6U5	Septin-9 (Fragment) OS=Mus musculus OX=10090 GN=Septin9 PE=1 SV=1 - [A2A6U5_MOUSE]	3.71763	8.26	6	2	2	2	242	27.5802	8.60205	Septin9
A2A6J4	Lymphocyte-specific protein 1 OS=Mus musculus OX=10090 GN=Lsp1 PE=1 SV=1 - [A2A6J4_MOUSE]	3.70518	8.07	4	2	2	2	322	35.7417	5.12256	Lsp1
G3XA39	Nuclear respiratory factor 1 OS=Mus musculus OX=10090 GN=Nrf1 PE=1 SV=1 - [G3XA39_MOUSE]	3.69681	4.45	11	2	2	2	449	49.0964	6.25244	Nrf1
O54946	DnaJ homolog subfamily B member 6 OS=Mus musculus OX=10090 GN=Dnajb6 PE=1 SV=4 - [DNJB6_MOUSE]	3.61423	8.22	6	2	2	2	365	39.7829	9.36377	Dnajb6
Q4V9X1	Ribosome biogenesis protein WDR12 OS=Mus musculus OX=10090 GN=Wdr12 PE=1 SV=1 - [Q4V9X1_MOUSE]	3.60303	13.71	2	4	4	4	423	47.3166	5.60498	Wdr12
A0A0J9YVA6	Septin-11 (Fragment) OS=Mus musculus OX=10090 GN=Septin11 PE=1 SV=1 - [A0A0J9YVA6_MOUSE]	3.59335	4.41	23	1	1	2	204	23.14	6.80029	Septin11
Q99M28-2	Isoform 2 of RNA-binding protein with serine-rich domain 1 OS=Mus musculus OX=10090 GN=Rnps1 - [RNPS1_MOUSE]	3.54938	5.32	3	1	1	1	282	31.6903	11.8979	Rnps1
Q71LX8	Heat shock protein 84b OS=Mus musculus OX=10090 GN=Hsp90ab1 PE=1 SV=1 - [Q71LX8_MOUSE]	3.49938	3.31	16	2	2	2	724	83.2291	5.03369	Hsp90ab1
E9Q715	Putative RNA-binding protein Luc7-like 2 OS=Mus musculus OX=10090 GN=Luc7l2 PE=1 SV=1 - [E9Q715_MOUSE]	3.35105	19.49	9	3	5	5	272	32.6269	10.0083	Luc7l2
D3YXN6	14-3-3 protein zeta/delta (Fragment) OS=Mus musculus OX=10090 GN=Ywhaz PE=1 SV=1 - [D3YXN6_MOUSE]	3.34151	17.05	20	2	2	2	88	10.092	6.72705	Ywhaz
Q08189	Protein-glutamine gamma-glutamyltransferase E OS=Mus musculus OX=10090 GN=Tgm3 PE=1 SV=2 - [TGM3_MOUSE]	3.18076	1.88	1	1	1	1	693	77.2609	6.81494	Tgm3
Q9CPN9	RIKEN cDNA 2210010C04 gene OS=Mus musculus OX=10090 GN=2210010C04Rik PE=1 SV=1 - [Q9CPN9_MOUSE]	2.91442	21.05	2	2	2	2	247	26.405	7.92822	2210010C04Rik
B2RPU5	TRAF3 interacting protein 3 OS=Mus musculus OX=10090 GN=Traf3ip3 PE=2 SV=1 - [B2RPU5_MOUSE]	2.88938	2.53	3	1	1	1	513	58.5763	8.39697	Traf3ip3
Q05CD2	Psip1 protein (Fragment) OS=Mus musculus OX=10090 GN=Psip1 PE=2 SV=1 - [Q05CD2_MOUSE]	2.88477	18.85	5	4	4	4	260	29.3544	9.65674	Psip1
A0A087WRA4	Myeloid cell nuclear differentiation antigen-like protein OS=Mus musculus OX=10090 GN=Mndal PE=1 SV=1 - [A0A087WRA4_MOUSE]	2.77006	2.68	2	1	1	1	485	54.7837	9.29053	Mndal
Q54AA6	O-acyltransferase OS=Mus musculus OX=10090 GN=Dgat1 PE=1 SV=1 - [Q54AA6_MOUSE]	2.73732	8.84	1	2	2	2	498	56.7534	9.39307	Dgat1
Q8R1H1	Nrd1 protein (Fragment) OS=Mus musculus OX=10090 GN=Nrd1 PE=2 SV=1 - [Q8R1H1_MOUSE]	2.72841	3.82	5	1	1	1	498	56.8201	5.8208	Nrd1
B7ZC24	Nuclear receptor coactivator 5 OS=Mus musculus OX=10090 GN=Ncoa5 PE=1 SV=1 - [B7ZC24_MOUSE]	2.67702	16.5	5	4	4	6	406	48.0462	9.68604	Ncoa5
Q3TK61	Uncharacterized protein OS=Mus musculus OX=10090 GN=Dnaja1 PE=2 SV=1 - [Q3TK61_MOUSE]	2.59381	9.57	18	3	3	4	397	44.8714	7.07861	Dnaja1
Q9CQJ4	E3 ubiquitin-protein ligase RING2 OS=Mus musculus OX=10090 GN=Rnf2 PE=1 SV=1 - [RING2_MOUSE]	2.51621	9.23	7	2	2	2	336	37.5997	6.84424	Rnf2
P97350	Plakophilin-1 OS=Mus musculus OX=10090 GN=Pkp1 PE=1 SV=1 - [PKP1_MOUSE]	2.51132	4.53	1	3	3	3	728	80.8444	8.90967	Pkp1
Q5SVP4	T-cell-specific guanine nucleotide triphosphate-binding protein 1 (Fragment) OS=Mus musculus OX=10090 GN=Tgtp1 PE=1 SV=1 - [Q5SVP4_MOUSE]	2.49685	14.39	2	1	1	1	132	14.6946	7.50342	Tgtp1
A0A097PUD0	Anti-dectin-1 15E2 light chain OS=Mus musculus OX=10090 PE=2 SV=1 - [A0A097PUD0_MOUSE]	2.41082	8.51	2	1	1	1	235	25.5996	8.30908	2
Q9Z2L2	Truncated hsp25 (Fragment) OS=Mus musculus OX=10090 GN=Hspb1 PE=2 SV=1 - [Q9Z2L2_MOUSE]	2.29467	19.51	1	1	1	1	82	9.40574	5.38916	Hspb1
A0A087WS65	E3 ubiquitin-protein ligase TRIP12 (Fragment) OS=Mus musculus OX=10090 GN=Trip12 PE=1 SV=1 - [A0A087WS65_MOUSE]	2.26739	23.08	7	1	1	1	65	6.88733	9.979	Trip12
E9PWI8	Protein C-ets-1 OS=Mus musculus OX=10090 GN=Ets1 PE=1 SV=1 - [E9PWI8_MOUSE]	2.26419	8.5	10	3	3	3	353	40.4921	5.12256	Ets1
Q3TM37	SNW domain-containing protein 1 (Fragment) OS=Mus musculus OX=10090 GN=Snw1 PE=2 SV=1 - [Q3TM37_MOUSE]	2.26113	3.19	4	1	1	1	313	35.2674	9.64209	Snw1
Q542A5	Uncharacterized protein OS=Mus musculus OX=10090 GN=Bhlhe40 PE=1 SV=1 - [Q542A5_MOUSE]	2.26041	4.87	1	2	2	2	411	45.3324	7.97217	Bhlhe40
A0A4U9FFL2	IgG1 (Fragment) OS=Mus musculus OX=10090 GN=Ighg1 PE=4 SV=1 - [A0A4U9FFL2_MOUSE]	2.25044	3.1	11	1	1	1	323	35.6107	7.40088	Ighg1
Q3UHX9-2	Isoform 2 of Putative methyltransferase C9orf114 homolog OS=Mus musculus OX=10090 GN=Spout1 - [CI114_MOUSE]	2.23102	9.57	3	3	3	3	345	37.9373	5.78271	Spout1
Q3U1T3	Breast cancer metastasis-suppressor 1-like protein OS=Mus musculus OX=10090 GN=Brms1l PE=2 SV=1 - [BRM1L_MOUSE]	2.22067	6.81	2	2	2	2	323	37.6335	5.14795	Brms1l
B8JJ53	Tripartite motif-containing protein 26 (Fragment) OS=Mus musculus OX=10090 GN=Trim26 PE=1 SV=1 - [B8JJ53_MOUSE]	2.21044	9.74	8	1	1	1	195	22.7491	9.74463	Trim26
Q6ZWP4	SWI/SNF-related matrix-associated actin-dependent regulator of chromatin subfamily B member 1 OS=Mus musculus OX=10090 GN=Smarcb1 PE=2 SV=1 - [Q6ZWP4_MOUSE]	2.20146	18.7	6	5	5	6	385	44.1132	6.22705	Smarcb1
D3Z4J1	DAZ-associated protein 1 (Fragment) OS=Mus musculus OX=10090 GN=Dazap1 PE=1 SV=1 - [D3Z4J1_MOUSE]	2.19344	9.36	5	1	1	1	171	19.3515	8.1626	Dazap1
A0A494BBM6	N-terminal kinase-like protein (Fragment) OS=Mus musculus OX=10090 GN=Scyl1 PE=1 SV=1 - [A0A494BBM6_MOUSE]	2.18924	11.06	5	1	1	1	226	25.1	8.80713	Scyl1
Q9Z237	Ribosomal protein L8 (Fragment) OS=Mus musculus OX=10090 PE=4 SV=1 - [Q9Z237_MOUSE]	2.17988	11.19	4	1	1	1	143	15.4453	9.99365	4
D3YXU1	Trifunctional enzyme subunit beta, mitochondrial (Fragment) OS=Mus musculus OX=10090 GN=Hadhb PE=1 SV=1 - [D3YXU1_MOUSE]	2.15797	5.2	2	1	1	1	173	18.9539	9.45166	Hadhb
Q3UYU8	Uncharacterized protein (Fragment) OS=Mus musculus OX=10090 GN=Phf2 PE=2 SV=1 - [Q3UYU8_MOUSE]	2.15587	3.4	4	1	1	1	412	43.418	9.64209	Phf2
P10639	Thioredoxin OS=Mus musculus OX=10090 GN=Txn PE=1 SV=3 - [THIO_MOUSE]	2.15246	8.57	1	1	1	1	105	11.6676	4.91943	Txn
Q7TT04	Nup43 protein (Fragment) OS=Mus musculus OX=10090 GN=Nup43 PE=2 SV=2 - [Q7TT04_MOUSE]	2.12522	9.6	5	3	3	3	375	41.295	5.63037	Nup43
G3UY98	N6-adenosine-methyltransferase subunit METTL3 OS=Mus musculus OX=10090 GN=Mettl3 PE=1 SV=1 - [G3UY98_MOUSE]	2.12059	22.22	9	1	1	1	36	4.28923	10.2427	Mettl3
P61620	Protein transport protein Sec61 subunit alpha isoform 1 OS=Mus musculus OX=10090 GN=Sec61a1 PE=1 SV=2 - [S61A1_MOUSE]	2.11672	8.19	6	3	3	3	476	52.2305	8.06006	Sec61a1
Q8BZ56	Uncharacterized protein OS=Mus musculus OX=10090 GN=Fli1 PE=2 SV=1 - [Q8BZ56_MOUSE]	2.10323	7.98	4	2	2	2	451	50.8825	7.06396	Fli1
Q9Z1M6	Transcription factor (Fragment) OS=Mus musculus OX=10090 GN=hic-1 PE=4 SV=1 - [Q9Z1M6_MOUSE]	2.10236	20.57	3	2	2	2	141	14.4305	7.50342	hic-1
A0A338P692	Alpha-2-HS-glycoprotein (Fragment) OS=Mus musculus OX=10090 GN=Ahsg PE=1 SV=1 - [A0A338P692_MOUSE]	2.10067	6.09	7	1	1	1	115	12.6024	7.26904	Ahsg
Q5SXC4	Vascular endothelial zinc finger 1 OS=Mus musculus OX=10090 GN=Vezf1 PE=1 SV=1 - [Q5SXC4_MOUSE]	2.09168	5.79	3	3	3	3	518	56.5206	9.56885	Vezf1
Q544K2	Regulator of G-protein signaling 18 OS=Mus musculus OX=10090 GN=Rgs18 PE=1 SV=1 - [Q544K2_MOUSE]	2.08235	3.4	1	1	1	1	235	27.5931	8.48486	Rgs18
Q3TFF0	Uncharacterized protein OS=Mus musculus OX=10090 GN=Dnaja2 PE=2 SV=1 - [Q3TFF0_MOUSE]	2.07927	3.16	2	1	1	1	412	45.7176	6.354	Dnaja2
Q8K265	WD repeat-containing protein 18 (Fragment) OS=Mus musculus OX=10090 GN=Wdr18 PE=2 SV=1 - [Q8K265_MOUSE]	2.06826	2.71	2	1	1	1	332	36.5717	6.87354	Wdr18
Q5U405	Transmembrane protease serine 13 OS=Mus musculus OX=10090 GN=Tmprss13 PE=2 SV=2 - [TMPSD_MOUSE]	2.01406	1.47	2	1	1	1	543	59.7679	9.01221	Tmprss13
A0A494BAQ2	Nuclear factor NF-kappa-B p100 subunit OS=Mus musculus OX=10090 GN=Nfkb2 PE=1 SV=1 - [A0A494BAQ2_MOUSE]	2.00015	1.55	8	1	1	1	776	84.1342	6.78564	Nfkb2
O54941	SWI/SNF-related matrix-associated actin-dependent regulator of chromatin subfamily E member 1 OS=Mus musculus OX=10090 GN=Smarce1 PE=1 SV=1 - [SMCE1_MOUSE]	1.99961	3.16	1	1	1	1	411	46.6096	4.88135	Smarce1
Q3V2M1	Uncharacterized protein (Fragment) OS=Mus musculus OX=10090 GN=Pabpc2 PE=2 SV=1 - [Q3V2M1_MOUSE]	1.99394	3.38	8	1	1	1	266	29.7038	7.04932	Pabpc2
D3Z2B3	Acyl-Coenzyme A dehydrogenase family, member 12 OS=Mus musculus OX=10090 GN=Acad12 PE=1 SV=1 - [D3Z2B3_MOUSE]	1.98335	4.02	4	1	1	1	373	41.3239	8.30908	Acad12
Q9Z315	U4/U6.U5 tri-snRNP-associated protein 1 OS=Mus musculus OX=10090 GN=Sart1 PE=1 SV=1 - [SNUT1_MOUSE]	1.97317	1.12	1	1	1	1	806	90.8304	5.8208	Sart1
P08752	Guanine nucleotide-binding protein G(i) subunit alpha-2 OS=Mus musculus OX=10090 GN=Gnai2 PE=1 SV=5 - [GNAI2_MOUSE]	1.96123	9.58	33	3	3	3	355	40.463	5.45264	Gnai2
Q3V3K3	Serine/threonine-protein kinase TAO3 OS=Mus musculus OX=10090 GN=Taok3 PE=1 SV=1 - [Q3V3K3_MOUSE]	1.95759	2.28	3	1	1	1	438	53.0317	9.18799	Taok3
D3YXK2	Scaffold attachment factor B1 OS=Mus musculus OX=10090 GN=Safb PE=1 SV=2 - [SAFB1_MOUSE]	1.9514	5.44	4	2	4	4	937	105.04	5.35107	Safb
Q80YR5	Scaffold attachment factor B2 OS=Mus musculus OX=10090 GN=Safb2 PE=1 SV=2 - [SAFB2_MOUSE]	1.9514	4.34	6	1	3	3	991	111.77	6.37939	Safb2
Q3UCH0	60S ribosomal protein L6 OS=Mus musculus OX=10090 GN=Rpl6 PE=1 SV=1 - [Q3UCH0_MOUSE]	1.94377	3.04	2	1	1	1	296	33.4889	10.6968	Rpl6
Q3U582	DNA helicase (Fragment) OS=Mus musculus OX=10090 GN=Chd4 PE=2 SV=1 - [Q3U582_MOUSE]	1.93064	3.91	14	3	3	3	895	103.137	6.29053	Chd4
P52480	Pyruvate kinase PKM OS=Mus musculus OX=10090 GN=Pkm PE=1 SV=4 - [KPYM_MOUSE]	1.92387	2.07	8	1	1	1	531	57.808	7.47412	Pkm
Q3UDZ8	Uncharacterized protein (Fragment) OS=Mus musculus OX=10090 GN=Mta2 PE=2 SV=1 - [Q3UDZ8_MOUSE]	1.91425	1.92	3	1	1	1	521	59.175	9.0415	Mta2
Q8BGS0-2	Isoform 2 of Protein MAK16 homolog OS=Mus musculus OX=10090 GN=Mak16 - [MAK16_MOUSE]	1.90722	20.34	2	5	5	5	290	34.4034	5.90967	Mak16
Q3U781	RRM domain-containing protein OS=Mus musculus OX=10090 GN=Srsf3 PE=2 SV=1 - [Q3U781_MOUSE]	1.90528	18.55	3	1	2	2	124	14.1942	10.0815	Srsf3
A0A0U1RPC4	Elongation factor Tu, mitochondrial (Fragment) OS=Mus musculus OX=10090 GN=Tufm PE=1 SV=1 - [A0A0U1RPC4_MOUSE]	1.90189	10.34	3	1	1	1	116	12.9678	9.21729	Tufm
P39749	Flap endonuclease 1 OS=Mus musculus OX=10090 GN=Fen1 PE=1 SV=1 - [FEN1_MOUSE]	1.89793	2.91	7	1	1	1	378	42.2879	8.33838	Fen1
A0A0R4J293	Protein-glutamine gamma-glutamyltransferase K OS=Mus musculus OX=10090 GN=Tgm1 PE=1 SV=1 - [A0A0R4J293_MOUSE]	1.86619	2.7	2	2	2	2	815	89.7394	6.58057	Tgm1
Q91VN1	Zinc finger protein 24 OS=Mus musculus OX=10090 GN=Znf24 PE=1 SV=1 - [ZNF24_MOUSE]	1.85583	7.88	2	3	3	3	368	41.8929	6.03662	Znf24
Q99K48-2	Isoform 2 of Non-POU domain-containing octamer-binding protein OS=Mus musculus OX=10090 GN=Nono - [NONO_MOUSE]	1.85033	6.85	9	1	2	2	219	24.9539	9.59814	Nono
D3Z3S1	Prolactin regulatory element-binding protein OS=Mus musculus OX=10090 GN=Preb PE=1 SV=1 - [D3Z3S1_MOUSE]	1.8376	4	2	1	1	1	350	37.9416	8.55811	Preb
Q9QUK9	TESP4 OS=Mus musculus OX=10090 GN=Try5 PE=1 SV=1 - [Q9QUK9_MOUSE]	1.8283	8.13	3	1	1	1	246	26.2599	5.30029	Try5
Q9CR32	U1 small nuclear ribonucleoprotein 70 kDa (Fragment) OS=Mus musculus OX=10090 GN=Snrnp70 PE=2 SV=3 - [Q9CR32_MOUSE]	1.81398	20.16	10	5	5	5	248	29.4031	9.83252	Snrnp70
G3UZ01	Polypyrimidine tract-binding protein 3 OS=Mus musculus OX=10090 GN=Ptbp3 PE=1 SV=1 - [G3UZ01_MOUSE]	1.81373	6.35	11	1	3	3	457	49.6016	8.82178	Ptbp3
Q62093	Serine/arginine-rich splicing factor 2 OS=Mus musculus OX=10090 GN=Srsf2 PE=1 SV=4 - [SRSF2_MOUSE]	1.79021	3.62	3	1	1	1	221	25.4612	11.854	Srsf2
Q3T9L1	Coronin OS=Mus musculus OX=10090 GN=Coro1a PE=2 SV=1 - [Q3T9L1_MOUSE]	1.7786	2.17	4	1	1	1	461	50.9849	6.48096	Coro1a
Q3UCF2	Uncharacterized protein OS=Mus musculus OX=10090 GN=Cdc5l PE=1 SV=1 - [Q3UCF2_MOUSE]	1.76638	5.86	7	4	4	4	802	92.1325	8.01611	Cdc5l
E9PY26	Bleomycin hydrolase (Fragment) OS=Mus musculus OX=10090 GN=Blmh PE=1 SV=1 - [E9PY26_MOUSE]	1.74591	6.7	2	1	1	1	179	20.8954	8.51416	Blmh
Q3TLH6	FABP domain-containing protein OS=Mus musculus OX=10090 GN=Fabp5 PE=2 SV=1 - [Q3TLH6_MOUSE]	1.74307	6.92	2	1	1	1	130	14.4059	6.0874	Fabp5
Q3TJY5	RED_N domain-containing protein (Fragment) OS=Mus musculus OX=10090 GN=Ik PE=2 SV=1 - [Q3TJY5_MOUSE]	1.7323	2.99	5	1	1	1	301	35.0719	8.03076	Ik
Z4YK03	Leukocyte elastase inhibitor A (Fragment) OS=Mus musculus OX=10090 GN=Serpinb1a PE=1 SV=2 - [Z4YK03_MOUSE]	1.72443	5.32	11	1	1	1	188	20.8765	5.56689	Serpinb1a
O35368	Interferon-activable protein 203 OS=Mus musculus OX=10090 GN=Ifi203 PE=1 SV=1 - [IFI3_MOUSE]	1.72271	6.86	11	1	2	2	408	46.2701	9.34912	Ifi203
Q3UDD3	Polymerase delta-interacting protein 3 OS=Mus musculus OX=10090 GN=Poldip3 PE=1 SV=1 - [Q3UDD3_MOUSE]	1.71802	9.97	7	3	3	3	391	42.909	9.979	Poldip3
F6T4M4	Serine/arginine repetitive matrix protein 1 (Fragment) OS=Mus musculus OX=10090 GN=Srrm1 PE=1 SV=1 - [F6T4M4_MOUSE]	1.7129	6.43	1	1	1	8	140	16.2313	5.37646	Srrm1
Q99JR8-2	Isoform 2 of SWI/SNF-related matrix-associated actin-dependent regulator of chromatin subfamily D member 2 OS=Mus musculus OX=10090 GN=Smarcd2 - [SMRD2_MOUSE]	1.71263	1.65	3	1	1	1	484	55.3387	9.48096	Smarcd2
B1AXW5	Peroxiredoxin-1 (Fragment) OS=Mus musculus OX=10090 GN=Prdx1 PE=1 SV=8 - [B1AXW5_MOUSE]	1.69837	16.57	5	3	3	3	169	18.8577	7.32764	Prdx1
P48962	ADP/ATP translocase 1 OS=Mus musculus OX=10090 GN=Slc25a4 PE=1 SV=4 - [ADT1_MOUSE]	1.68444	6.04	4	2	2	2	298	32.8831	9.71533	Slc25a4
Q3TV90	Uncharacterized protein (Fragment) OS=Mus musculus OX=10090 GN=Luc7l PE=2 SV=1 - [Q3TV90_MOUSE]	1.68344	18.78	6	2	4	4	245	28.1122	6.03662	Luc7l
P70199	ERF1 (Fragment) OS=Mus musculus OX=10090 GN=Etf1 PE=2 SV=1 - [P70199_MOUSE]	1.67135	2.96	6	1	1	1	338	38.2413	5.09717	Etf1
Q8BZN7	Thyroid hormone receptor-associated protein 3 OS=Mus musculus OX=10090 GN=Thrap3 PE=1 SV=1 - [Q8BZN7_MOUSE]	1.65968	3.1	6	2	2	2	709	80.063	10.3159	Thrap3
Q9JJD0	THAP domain-containing protein 11 OS=Mus musculus OX=10090 GN=Thap11 PE=1 SV=1 - [THA11_MOUSE]	1.6539	8.52	1	3	3	3	305	33.255	8.82178	Thap11
Q9QX47-2	Isoform 2 of Protein SON OS=Mus musculus OX=10090 GN=Son - [SON_MOUSE]	1.64789	0.66	7	1	1	1	2126	229.876	5.38916	Son
D3Z6F5	ATP synthase subunit alpha OS=Mus musculus OX=10090 GN=Atp5a1 PE=1 SV=1 - [D3Z6F5_MOUSE]	1.64562	7.95	4	4	4	4	503	54.5607	8.23584	Atp5a1
Q9R1C0	Transcription initiation factor TFIID subunit 7 OS=Mus musculus OX=10090 GN=Taf7 PE=1 SV=1 - [TAF7_MOUSE]	1.64211	5.57	3	2	2	2	341	39.1021	5.32568	Taf7
Q3UBI6	Uncharacterized protein OS=Mus musculus OX=10090 GN=Rpl7 PE=2 SV=1 - [Q3UBI6_MOUSE]	1.63737	4.07	3	1	1	1	270	31.3307	10.8286	Rpl7
Q8BL33	PSP domain-containing protein (Fragment) OS=Mus musculus OX=10090 GN=Sf3b2 PE=2 SV=1 - [Q8BL33_MOUSE]	1.6311	4.64	6	2	2	2	453	51.454	6.37939	Sf3b2
Q9R233-2	Isoform Short of Tapasin OS=Mus musculus OX=10090 GN=Tapbp - [TPSN_MOUSE]	1.62417	4.6	18	2	2	2	435	46.5914	8.67529	Tapbp
Q60739-2	Isoform 2 of BAG family molecular chaperone regulator 1 OS=Mus musculus OX=10090 GN=Bag1 - [BAG1_MOUSE]	1.62274	5.02	3	1	1	1	219	24.8589	4.97021	Bag1
Q8C4J3	AGC-kinase C-terminal domain-containing protein (Fragment) OS=Mus musculus OX=10090 GN=Prkacb PE=2 SV=1 - [Q8C4J3_MOUSE]	1.61863	8.33	8	1	1	1	108	12.6005	7.28369	Prkacb
Q9CR57	60S ribosomal protein L14 OS=Mus musculus OX=10090 GN=Rpl14 PE=1 SV=3 - [RL14_MOUSE]	1.61545	5.99	2	1	1	1	217	23.5492	11.019	Rpl14
A2BDX3	Adenylyltransferase and sulfurtransferase MOCS3 OS=Mus musculus OX=10090 GN=Mocs3 PE=1 SV=1 - [MOCS3_MOUSE]	1.60466	1.96	1	1	1	2	460	49.3438	7.48877	Mocs3
A0A068BIT0	Solute carrier family 39 OS=Mus musculus OX=10090 GN=Slc39a7 PE=1 SV=1 - [A0A068BIT0_MOUSE]	0	5.88	2	2	2	2	476	50.6254	6.87354	Slc39a7
A0A075B652	T cell receptor alpha variable 5-4 (Fragment) OS=Mus musculus OX=10090 GN=Trav5-4 PE=4 SV=1 - [A0A075B652_MOUSE]	0	5.26	4	1	1	1	114	13.0504	5.17334	Trav5-4
A0A0A6YXP3	Muscleblind-like protein 1 (Fragment) OS=Mus musculus OX=10090 GN=Mbnl1 PE=1 SV=1 - [A0A0A6YXP3_MOUSE]	0	3.85	18	1	1	1	182	19.6539	8.77783	Mbnl1
A0A0R4J0P5	Proline-serine-threonine phosphatase-interacting protein 1 OS=Mus musculus OX=10090 GN=Pstpip1 PE=1 SV=1 - [A0A0R4J0P5_MOUSE]	0	1.93	2	1	1	1	415	47.5466	5.52881	Pstpip1
A0A140LHE6	Interferon regulatory factor 3 (Fragment) OS=Mus musculus OX=10090 GN=Irf3 PE=1 SV=1 - [A0A140LHE6_MOUSE]	0	6.25	4	1	1	1	160	17.9302	6.96143	Irf3
A0A140LJ34	Suppressor of Ty 5, DSIF elongation factor subunit (Fragment) OS=Mus musculus OX=10090 GN=Supt5 PE=1 SV=1 - [A0A140LJ34_MOUSE]	0	6.04	3	1	1	1	149	16.9969	8.06006	Supt5
A0A140LJJ1	Predicted gene 44973 OS=Mus musculus OX=10090 GN=Gm44973 PE=4 SV=1 - [A0A140LJJ1_MOUSE]	0	5.29	2	1	1	1	189	20.6365	9.53955	Gm44973
A0A1B0GSP6	Predicted gene 45261 OS=Mus musculus OX=10090 GN=Gm45261 PE=4 SV=1 - [A0A1B0GSP6_MOUSE]	0	3.05	2	1	1	1	197	21.7808	6.771	Gm45261
A0A1I7Q4G8	Transcriptional repressor p66 alpha OS=Mus musculus OX=10090 GN=Gatad2a PE=1 SV=1 - [A0A1I7Q4G8_MOUSE]	0	1.95	3	1	1	1	614	65.3942	9.75928	Gatad2a
A0A1Y7VKB8	Cyclin-dependent kinase 20 (Fragment) OS=Mus musculus OX=10090 GN=Cdk20 PE=4 SV=1 - [A0A1Y7VKB8_MOUSE]	0	11.27	139	1	1	1	71	8.02713	9.31982	Cdk20
A0A286YDW5	Regulator of microtubule dynamics protein 2 (Fragment) OS=Mus musculus OX=10090 GN=Rmdn2 PE=1 SV=1 - [A0A286YDW5_MOUSE]	0	9.84	2	1	1	1	122	13.8094	8.67529	Rmdn2
A0A3B2WCD8	Far upstream element-binding protein 2 OS=Mus musculus OX=10090 GN=Khsrp PE=1 SV=1 - [A0A3B2WCD8_MOUSE]	0	1.53	2	1	1	1	721	74.2065	6.96143	Khsrp
A0A3Q4EI07	Protein SSXT OS=Mus musculus OX=10090 GN=Ss18 PE=1 SV=1 - [A0A3Q4EI07_MOUSE]	0	29.27	11	1	1	1	41	4.37431	9.83252	Ss18
A2A9R3	Melanoma-associated antigen B4 OS=Mus musculus OX=10090 GN=Mageb4 PE=1 SV=1 - [MAGB4_MOUSE]	0	1.98	1	1	1	1	556	60.8844	9.15869	Mageb4
A2AIM5	Tropomyosin beta chain (Fragment) OS=Mus musculus OX=10090 GN=Tpm2 PE=1 SV=8 - [A2AIM5_MOUSE]	0	9.52	35	1	1	1	105	12.1702	4.90674	Tpm2
A2ALB1	RNA exonuclease 4 (Fragment) OS=Mus musculus OX=10090 GN=Rexo4 PE=1 SV=1 - [A2ALB1_MOUSE]	0	2.48	3	1	1	1	363	40.0713	9.80322	Rexo4
A2APA3	Cleavage stimulation factor subunit 1 (Fragment) OS=Mus musculus OX=10090 GN=Cstf1 PE=1 SV=1 - [A2APA3_MOUSE]	0	9.68	2	1	1	1	155	17.0455	4.90674	Cstf1
A2ASR6	Polycomb complex protein BMI-1 (Fragment) OS=Mus musculus OX=10090 GN=Bmi1 PE=1 SV=1 - [A2ASR6_MOUSE]	0	7.62	6	1	1	1	105	12.2403	8.74854	Bmi1
A2AW05	FACT complex subunit SSRP1 (Fragment) OS=Mus musculus OX=10090 GN=Ssrp1 PE=1 SV=1 - [A2AW05_MOUSE]	0	3.37	4	2	2	2	623	71.4836	6.03662	Ssrp1
A6PWY4-2	Isoform 2 of WD repeat-containing protein 76 OS=Mus musculus OX=10090 GN=Wdr76 - [WDR76_MOUSE]	0	2.67	2	1	1	1	524	57.9244	8.49951	Wdr76
B5B2P6	Nuclear factor of activated T-cells c2 isoform IA-IIL-Xa OS=Mus musculus OX=10090 GN=Nfatc2 PE=2 SV=1 - [B5B2P6_MOUSE]	0	5.2	16	3	3	3	903	97.5562	8.00146	Nfatc2
B7ZMR9	Zinc finger protein 800 OS=Mus musculus OX=10090 GN=Zfp800 PE=1 SV=1 - [B7ZMR9_MOUSE]	0	6.04	3	3	3	3	662	74.7666	9.42236	Zfp800
B7ZWI7	S1 RNA-binding domain-containing protein 1 OS=Mus musculus OX=10090 GN=Srbd1 PE=1 SV=1 - [B7ZWI7_MOUSE]	0	4.71	6	1	1	1	170	18.8152	8.89502	Srbd1
B9EKE4	Periphilin 1 OS=Mus musculus OX=10090 GN=Pphln1 PE=2 SV=1 - [B9EKE4_MOUSE]	0	8.53	7	3	3	3	293	33.8493	6.48096	Pphln1
C0HKD9	Microfibrillar-associated protein 1B OS=Mus musculus OX=10090 GN=Mfap1b PE=1 SV=1 - [MFA1B_MOUSE]	0	6.15	1	2	2	2	439	51.9227	4.98291	Mfap1b
D3YW26	Transcriptional adaptor 2B OS=Mus musculus OX=10090 GN=Tada2b PE=1 SV=1 - [D3YW26_MOUSE]	0	2.03	2	1	1	1	345	39.9767	8.80713	Tada2b
D3Z263	RNA 3'-terminal phosphate cyclase (Fragment) OS=Mus musculus OX=10090 GN=Rtca PE=1 SV=1 - [D3Z263_MOUSE]	0	7.04	6	1	1	1	142	15.5042	9.45166	Rtca
D3Z4V1	Pleiotropic regulator 1 OS=Mus musculus OX=10090 GN=Plrg1 PE=1 SV=1 - [D3Z4V1_MOUSE]	0	1.39	2	1	1	1	504	56.0246	9.18799	Plrg1
D3Z4W5	RIKEN cDNA 1700074P13 gene (Fragment) OS=Mus musculus OX=10090 GN=1700074P13Rik PE=4 SV=1 - [D3Z4W5_MOUSE]	0	3.98	2	1	1	1	176	20.137	5.05908	1700074P13Rik
D3Z510	Fructose-bisphosphate aldolase (Fragment) OS=Mus musculus OX=10090 GN=Aldoa PE=1 SV=2 - [D3Z510_MOUSE]	0	7.78	9	1	1	1	180	19.5611	8.1626	Aldoa
E0CXJ3	Eukaryotic translation initiation factor 2 subunit 2 (Fragment) OS=Mus musculus OX=10090 GN=Eif2s2 PE=1 SV=1 - [E0CXJ3_MOUSE]	0	16.95	2	1	1	1	118	13.6166	4.58936	Eif2s2
E9PX03	Coronin OS=Mus musculus OX=10090 GN=Coro1c PE=1 SV=1 - [E9PX03_MOUSE]	0	6.92	5	1	1	1	159	17.4929	7.76709	Coro1c
E9Q8Q1	BRCA1-A complex subunit BRE OS=Mus musculus OX=10090 GN=Babam2 PE=1 SV=1 - [E9Q8Q1_MOUSE]	0	23.26	5	1	1	1	43	4.59943	9.14404	Babam2
E9Q9Q7	Actin-binding LIM protein 1 OS=Mus musculus OX=10090 GN=Ablim1 PE=1 SV=1 - [E9Q9Q7_MOUSE]	0	10.75	18	3	3	3	400	45.855	8.07471	Ablim1
E9QN31	Probable 28S rRNA (cytosine-C(5))-methyltransferase OS=Mus musculus OX=10090 GN=Nop2 PE=1 SV=1 - [E9QN31_MOUSE]	0	4.03	3	3	3	3	794	86.8538	9.18799	Nop2
F6ZA56	Telomere zinc finger-associated protein (Fragment) OS=Mus musculus OX=10090 GN=Zbtb48 PE=4 SV=1 - [F6ZA56_MOUSE]	0	14.02	3	1	1	1	164	18.228	7.34229	Zbtb48
F7AI47	Serine/arginine-rich-splicing factor 1 (Fragment) OS=Mus musculus OX=10090 GN=Srsf1 PE=1 SV=1 - [F7AI47_MOUSE]	0	9.43	5	1	1	1	106	11.6037	9.75928	Srsf1
G3UXK8	116 kDa U5 small nuclear ribonucleoprotein component (Fragment) OS=Mus musculus OX=10090 GN=Eftud2 PE=1 SV=1 - [G3UXK8_MOUSE]	0	15.29	8	1	1	1	85	9.53201	9.11475	Eftud2
G3UZ82	Bromodomain adjacent to zinc finger domain protein 1A (Fragment) OS=Mus musculus OX=10090 GN=Baz1a PE=1 SV=1 - [G3UZ82_MOUSE]	0	12.79	3	1	1	1	172	19.9581	5.59229	Baz1a
G3X956	FACT complex subunit OS=Mus musculus OX=10090 GN=Supt16 PE=1 SV=1 - [G3X956_MOUSE]	0	1.05	2	1	1	1	1047	119.763	5.65576	Supt16
O89069	Elongation factor 2 (Fragment) OS=Mus musculus OX=10090 GN=Eef2 PE=2 SV=1 - [O89069_MOUSE]	0	6.95	14	1	1	1	259	28.6385	5.2876	Eef2
P01101	Proto-oncogene c-Fos OS=Mus musculus OX=10090 GN=Fos PE=1 SV=1 - [FOS_MOUSE]	0	7.63	3	2	2	2	380	40.8128	4.86865	Fos
P25799-4	Isoform 4 of Nuclear factor NF-kappa-B p105 subunit OS=Mus musculus OX=10090 GN=Nfkb1 - [NFKB1_MOUSE]	0	3.93	4	1	1	1	356	39.7311	6.84424	Nfkb1
P35441	Thrombospondin-1 OS=Mus musculus OX=10090 GN=Thbs1 PE=1 SV=1 - [TSP1_MOUSE]	0	1.2	4	1	1	1	1170	129.564	4.95752	Thbs1
P47878	Insulin-like growth factor-binding protein 3 OS=Mus musculus OX=10090 GN=Igfbp3 PE=2 SV=2 - [IBP3_MOUSE]	0	4.45	1	1	1	1	292	31.6665	8.38232	Igfbp3
P70460	Vasodilator-stimulated phosphoprotein OS=Mus musculus OX=10090 GN=Vasp PE=1 SV=4 - [VASP_MOUSE]	0	2.93	1	1	1	1	375	39.6419	8.52881	Vasp
Q02614	SAP30-binding protein OS=Mus musculus OX=10090 GN=Sap30bp PE=1 SV=2 - [S30BP_MOUSE]	0	7.47	1	2	2	2	308	33.8116	4.86865	Sap30bp
Q059K7	XK-related protein OS=Mus musculus OX=10090 GN=Xk PE=2 SV=1 - [Q059K7_MOUSE]	0	1.35	7	1	1	1	446	51.0807	8.19189	Xk
Q05D19	Acin1 protein (Fragment) OS=Mus musculus OX=10090 GN=Acin1 PE=2 SV=1 - [Q05D19_MOUSE]	0	4.5	11	1	1	1	378	40.9631	7.23975	Acin1
Q2V6Q0	Bromodomain and PHD finger containing protein 1 transcript BRPF2 OS=Mus musculus OX=10090 GN=Brpf1 PE=2 SV=1 - [Q2V6Q0_MOUSE]	0	1.58	10	1	1	1	442	50.2939	6.02393	Brpf1
Q3TAR6	Protein kinase domain-containing protein OS=Mus musculus OX=10090 GN=Vrk3 PE=1 SV=1 - [Q3TAR6_MOUSE]	0	2.43	1	1	1	1	453	50.7977	8.57275	Vrk3
Q3TBZ3	Uncharacterized protein (Fragment) OS=Mus musculus OX=10090 GN=Tcof1 PE=2 SV=1 - [Q3TBZ3_MOUSE]	0	1.54	6	1	1	1	650	66.8307	9.11475	Tcof1
Q3TF62	Uncharacterized protein OS=Mus musculus OX=10090 GN=Actl6a PE=2 SV=1 - [Q3TF62_MOUSE]	0	5.36	3	2	2	2	429	47.4894	5.50342	Actl6a
Q3TJX0	Uncharacterized protein OS=Mus musculus OX=10090 GN=Lcp1 PE=2 SV=1 - [Q3TJX0_MOUSE]	0	8.93	11	4	4	4	627	70.0908	5.32568	Lcp1
Q3TTE1	Uncharacterized protein OS=Mus musculus OX=10090 GN=Rbms1 PE=2 SV=1 - [Q3TTE1_MOUSE]	0	6.94	7	1	1	1	216	23.4723	7.1665	Rbms1
Q3TVZ1	Catalase OS=Mus musculus OX=10090 GN=Cat PE=2 SV=1 - [Q3TVZ1_MOUSE]	0	7.02	7	3	3	3	527	59.6937	7.88428	Cat
Q3TYL9	2',3'-cyclic-nucleotide 3'-phosphodiesterase OS=Mus musculus OX=10090 GN=Cnp PE=2 SV=1 - [Q3TYL9_MOUSE]	0	19	10	7	7	7	400	44.6262	8.51416	Cnp
Q3U0H4	Uncharacterized protein OS=Mus musculus OX=10090 GN=Aup1 PE=2 SV=1 - [Q3U0H4_MOUSE]	0	2.69	6	1	1	1	260	29.3845	6.78564	Aup1
Q3U5P8	40S ribosomal protein S3a OS=Mus musculus OX=10090 GN=Rps3a1 PE=2 SV=1 - [Q3U5P8_MOUSE]	0	3.41	4	1	1	1	264	29.8077	9.77393	Rps3a1
Q3U6F1	Recombining-binding protein suppressor of hairless OS=Mus musculus OX=10090 GN=Rbpj PE=1 SV=1 - [Q3U6F1_MOUSE]	0	2.37	5	1	1	1	465	51.8937	7.32764	Rbpj
Q3UAZ7	Uncharacterized protein (Fragment) OS=Mus musculus OX=10090 GN=Hmgb2 PE=2 SV=1 - [Q3UAZ7_MOUSE]	0	8.29	4	1	1	1	181	20.5205	9.81787	Hmgb2
Q3UCU5	Arrestin_N domain-containing protein (Fragment) OS=Mus musculus OX=10090 GN=Arrb2 PE=2 SV=1 - [Q3UCU5_MOUSE]	0	8.43	10	1	1	1	83	9.46199	8.45557	Arrb2
Q3UCW9	MHD domain-containing protein (Fragment) OS=Mus musculus OX=10090 GN=Ap2m1 PE=2 SV=1 - [Q3UCW9_MOUSE]	0	6.83	5	2	2	2	322	36.6621	9.21729	Ap2m1
Q3UIZ4	CXXC-type zinc finger protein 1 OS=Mus musculus OX=10090 GN=Cxxc1 PE=2 SV=1 - [Q3UIZ4_MOUSE]	0	1.21	2	1	1	1	660	76.1484	8.22119	Cxxc1
Q3UKH3	Uncharacterized protein OS=Mus musculus OX=10090 GN=Acaa2 PE=2 SV=1 - [Q3UKH3_MOUSE]	0	3.53	2	1	1	1	397	41.8025	8.25049	Acaa2
Q3UKJ7-2	Isoform 2 of WD40 repeat-containing protein SMU1 OS=Mus musculus OX=10090 GN=Smu1 - [SMU1_MOUSE]	0	3.01	2	1	1	1	332	37.5242	6.65381	Smu1
Q3USR8	Uncharacterized protein (Fragment) OS=Mus musculus OX=10090 GN=Ctcf PE=2 SV=1 - [Q3USR8_MOUSE]	0	4.03	3	2	2	2	596	68.3054	8.07471	Ctcf
Q3UX26	Uncharacterized protein (Fragment) OS=Mus musculus OX=10090 GN=Pak1ip1 PE=2 SV=1 - [Q3UX26_MOUSE]	0	2.14	2	1	1	1	374	41.0327	7.76709	Pak1ip1
Q3V016	Homeodomain-interacting protein kinase 4 OS=Mus musculus OX=10090 GN=Hipk4 PE=1 SV=2 - [HIPK4_MOUSE]	0	3.41	1	1	1	1	616	69.2353	7.35693	Hipk4
Q3V1G6	Histone acetyltransferase (Fragment) OS=Mus musculus OX=10090 GN=Kat6a PE=2 SV=1 - [Q3V1G6_MOUSE]	0	1.22	5	1	1	1	1148	131.114	8.17725	Kat6a
Q497E9	40S ribosomal protein S8 OS=Mus musculus OX=10090 GN=Rps8 PE=1 SV=1 - [Q497E9_MOUSE]	0	4.33	1	1	1	1	208	24.1902	10.3159	Rps8
Q4QQM3	Unc84b protein OS=Mus musculus OX=10090 GN=Sun2 PE=2 SV=1 - [Q4QQM3_MOUSE]	0	1.9	4	1	1	1	473	52.6107	7.84033	Sun2
Q50L42-2	Isoform 2 of Cytosolic phospholipase A2 epsilon OS=Mus musculus OX=10090 GN=Pla2g4e - [PA24E_MOUSE]	0	4.21	1	1	1	2	356	40.6837	5.70654	Pla2g4e
Q58E49	Histone deacetylase OS=Mus musculus OX=10090 GN=Hdac1 PE=2 SV=1 - [Q58E49_MOUSE]	0	4.56	2	1	2	2	482	55.0397	5.47803	Hdac1
Q5BJ24	Zinc finger and BTB domain containing 7B OS=Mus musculus OX=10090 GN=Zbtb7b PE=2 SV=1 - [Q5BJ24_MOUSE]	0	1.47	1	1	1	1	544	58.8806	5.77002	Zbtb7b
Q5NBZ3	Uncharacterized protein OS=Mus musculus OX=10090 GN=Drg1 PE=1 SV=1 - [Q5NBZ3_MOUSE]	0	3	3	1	1	1	367	40.4868	8.89502	Drg1
Q61299	Amylase (Fragment) OS=Mus musculus OX=10090 PE=4 SV=1 - [Q61299_MOUSE]	0	6.7	6	1	1	1	179	20.6189	9.36377	4
Q62517	Zinc finger protein (Fragment) OS=Mus musculus OX=10090 GN=Zfp260 PE=2 SV=1 - [Q62517_MOUSE]	0	4.89	2	1	1	1	184	21.1784	9.15869	Zfp260
Q69Z99	Zinc finger protein 512 OS=Mus musculus OX=10090 GN=Znf512 PE=2 SV=2 - [ZN512_MOUSE]	0	7.65	4	3	3	3	562	63.8674	9.51025	Znf512
Q6P1G0	HEAT repeat-containing protein 6 OS=Mus musculus OX=10090 GN=Heatr6 PE=1 SV=1 - [HEAT6_MOUSE]	0	1.69	1	1	1	1	1184	128.84	7.23975	Heatr6
Q6PAC3	DDB1- and CUL4-associated factor 13 OS=Mus musculus OX=10090 GN=Dcaf13 PE=2 SV=2 - [DCA13_MOUSE]	0	10.34	1	5	5	7	445	51.423	9.31982	Dcaf13
Q80V43	GPI-anchor transamidase OS=Mus musculus OX=10090 GN=Pigk PE=2 SV=1 - [Q80V43_MOUSE]	0	5.83	6	1	1	1	206	23.7389	6.53662	Pigk
Q80VD1	Protein FAM98B OS=Mus musculus OX=10090 GN=Fam98b PE=1 SV=1 - [FA98B_MOUSE]	0	8.62	2	3	3	3	429	45.3208	8.49951	Fam98b
Q8BJ90	Zinc finger protein 771 OS=Mus musculus OX=10090 GN=Znf771 PE=2 SV=1 - [ZN771_MOUSE]	0	2.84	1	1	1	1	317	35.7441	8.82178	Znf771
Q8BJX2	RIKEN cDNA 6820408C15 gene OS=Mus musculus OX=10090 GN=6820408C15Rik PE=2 SV=1 - [Q8BJX2_MOUSE]	0	4.8	2	1	1	1	354	41.2198	9.36377	6820408C15Rik
Q8BKX6	Serine/threonine-protein kinase SMG1 OS=Mus musculus OX=10090 GN=Smg1 PE=1 SV=3 - [SMG1_MOUSE]	0	0.52	1	1	1	1	3658	409.511	6.40479	Smg1
Q8BPI7	Adenosylhomocysteinase (Fragment) OS=Mus musculus OX=10090 PE=2 SV=1 - [Q8BPI7_MOUSE]	0	3.7	5	1	1	1	324	36.0174	6.53662	2
Q8BQ10	Histone deacetylase OS=Mus musculus OX=10090 GN=Hdac2 PE=1 SV=1 - [Q8BQ10_MOUSE]	0	7.24	5	1	2	2	304	34.6678	7.91357	Hdac2
Q8BRU5	RNA helicase OS=Mus musculus OX=10090 GN=Ddx50 PE=2 SV=1 - [Q8BRU5_MOUSE]	0	1.49	3	1	1	1	669	74.545	9.34912	Ddx50
Q8BY26	AAA domain-containing protein OS=Mus musculus OX=10090 GN=Rfc3 PE=2 SV=1 - [Q8BY26_MOUSE]	0	13.7	2	3	3	3	270	30.6179	8.73389	Rfc3
Q8BZS1	Apolipoprotein L 10b OS=Mus musculus OX=10090 GN=Apol10b PE=2 SV=1 - [Q8BZS1_MOUSE]	0	3.05	4	1	1	1	197	21.7267	9.26123	Apol10b
Q8C4W4	Uncharacterized protein (Fragment) OS=Mus musculus OX=10090 GN=Ythdc1 PE=2 SV=1 - [Q8C4W4_MOUSE]	0	3.66	4	1	1	1	164	20.185	10.5356	Ythdc1
Q8C9V1-2	Isoform 2 of Carabin OS=Mus musculus OX=10090 GN=Tbc1d10c - [TB10C_MOUSE]	0	4.45	6	2	2	2	427	47.9279	8.99756	Tbc1d10c
Q8CD15	Ribosomal oxygenase 2 OS=Mus musculus OX=10090 GN=Riox2 PE=1 SV=2 - [RIOX2_MOUSE]	0	9.68	9	3	3	3	465	53.4834	6.37939	Riox2
Q8CEG3	Bms1-type G domain-containing protein (Fragment) OS=Mus musculus OX=10090 GN=Bms1 PE=2 SV=1 - [Q8CEG3_MOUSE]	0	2.16	5	1	1	1	416	47.1296	9.46631	Bms1
Q8K224	RNA cytidine acetyltransferase OS=Mus musculus OX=10090 GN=Nat10 PE=1 SV=1 - [NAT10_MOUSE]	0	1.66	1	1	1	1	1024	115.346	8.32373	Nat10
Q8R190	Cdc2l1 protein (Fragment) OS=Mus musculus OX=10090 GN=Cdk11b PE=2 SV=1 - [Q8R190_MOUSE]	0	3.04	4	1	1	1	362	40.9983	8.48486	Cdk11b
Q8R1S9	Sodium-coupled neutral amino acid transporter 4 OS=Mus musculus OX=10090 GN=Slc38a4 PE=1 SV=1 - [S38A4_MOUSE]	0	7.5	1	1	1	1	547	60.4242	6.46826	Slc38a4
Q8VC94	60S ribosomal protein L11 OS=Mus musculus OX=10090 GN=Rpl11 PE=2 SV=1 - [Q8VC94_MOUSE]	0	4.19	3	1	1	1	167	19.0121	9.80322	Rpl11
Q8VEG0	Coiled-coil domain-containing protein 71 OS=Mus musculus OX=10090 GN=Ccdc71 PE=2 SV=1 - [CCD71_MOUSE]	0	2.77	1	1	1	1	433	45.9813	11.019	Ccdc71
Q91VV4-2	Isoform 2 of DENN domain-containing protein 2D OS=Mus musculus OX=10090 GN=Dennd2d - [DEN2D_MOUSE]	0	3.43	1	1	1	1	466	52.8544	7.97217	Dennd2d
Q91YU3	Myb/SANT-like DNA-binding domain-containing protein 4 OS=Mus musculus OX=10090 GN=Msantd4 PE=2 SV=1 - [MSD4_MOUSE]	0	5.8	1	1	1	2	345	41.2214	5.43994	Msantd4
Q921U0	Ap3m1 protein (Fragment) OS=Mus musculus OX=10090 GN=Ap3m1 PE=2 SV=1 - [Q921U0_MOUSE]	0	5.44	5	1	1	1	147	16.3388	9.89111	Ap3m1
Q99KP6-3	Isoform 3 of Pre-mRNA-processing factor 19 OS=Mus musculus OX=10090 GN=Prpf19 - [PRP19_MOUSE]	0	5.01	3	2	2	2	419	45.7605	7.06396	Prpf19
Q99M87-3	Isoform 3 of DnaJ homolog subfamily A member 3, mitochondrial OS=Mus musculus OX=10090 GN=Dnaja3 - [DNJA3_MOUSE]	0	5.36	3	1	1	1	429	46.8179	9.51025	Dnaja3
Q9CQ48	NudC domain-containing protein 2 OS=Mus musculus OX=10090 GN=Nudcd2 PE=1 SV=1 - [NUDC2_MOUSE]	0	12.74	1	1	1	1	157	17.6487	5.07178	Nudcd2
Q9CQT1	Methylthioribose-1-phosphate isomerase OS=Mus musculus OX=10090 GN=Mri1 PE=1 SV=1 - [MTNA_MOUSE]	0	2.98	1	1	1	1	369	39.3864	5.90967	Mri1
Q9CSH0	Uncharacterized protein (Fragment) OS=Mus musculus OX=10090 GN=Hnrnpll PE=2 SV=1 - [Q9CSH0_MOUSE]	0	3.74	5	2	2	2	588	63.3504	6.85889	Hnrnpll
Q9CTM9	Uncharacterized protein (Fragment) OS=Mus musculus OX=10090 GN=Ddx42 PE=2 SV=2 - [Q9CTM9_MOUSE]	0	14.39	2	1	1	1	139	15.2061	4.83057	Ddx42
Q9CVB3	Uncharacterized protein (Fragment) OS=Mus musculus OX=10090 GN=Lsm11 PE=2 SV=1 - [Q9CVB3_MOUSE]	0	7.32	2	1	1	1	164	18.4997	10.4038	Lsm11
Q9CYX7	RRP15-like protein OS=Mus musculus OX=10090 GN=Rrp15 PE=1 SV=2 - [RRP15_MOUSE]	0	3.91	1	1	1	1	281	31.0387	8.76318	Rrp15
Q9CZX5	PIN2/TERF1-interacting telomerase inhibitor 1 OS=Mus musculus OX=10090 GN=Pinx1 PE=1 SV=2 - [PINX1_MOUSE]	0	10.24	1	2	2	2	332	37.1981	9.62744	Pinx1
Q9DB85	Ribosomal RNA-processing protein 8 OS=Mus musculus OX=10090 GN=Rrp8 PE=1 SV=1 - [RRP8_MOUSE]	0	6.35	3	2	2	2	457	51.0346	9.75928	Rrp8
Q9DBE9	pre-rRNA 2'-O-ribose RNA methyltransferase FTSJ3 OS=Mus musculus OX=10090 GN=Ftsj3 PE=1 SV=1 - [SPB1_MOUSE]	0	1.07	1	1	1	1	838	95.4739	8.38232	Ftsj3
Q9DBS1	Transmembrane protein 43 OS=Mus musculus OX=10090 GN=Tmem43 PE=1 SV=1 - [TMM43_MOUSE]	0	6.25	1	2	2	2	400	44.7551	7.35693	Tmem43
Q9EQ61	Pescadillo homolog OS=Mus musculus OX=10090 GN=Pes1 PE=1 SV=1 - [PESC_MOUSE]	0	1.71	2	1	1	1	584	67.753	6.84424	Pes1
Q9JJF3	Ribosomal oxygenase 1 OS=Mus musculus OX=10090 GN=Riox1 PE=1 SV=2 - [RIOX1_MOUSE]	0	2.32	1	1	1	1	603	67.5149	8.66064	Riox1
Q9QWH1-2	Isoform 2 of Polyhomeotic-like protein 2 OS=Mus musculus OX=10090 GN=Phc2 - [PHC2_MOUSE]	0	6.81	8	2	2	2	323	35.7251	8.6167	Phc2
Q9WUB0	RanBP-type and C3HC4-type zinc finger-containing protein 1 OS=Mus musculus OX=10090 GN=Rbck1 PE=1 SV=2 - [HOIL1_MOUSE]	0	1.77	1	1	1	1	508	57.4969	6.18896	Rbck1
Q9Z277-2	Isoform 2 of Tyrosine-protein kinase BAZ1B OS=Mus musculus OX=10090 GN=Baz1b - [BAZ1B_MOUSE]	0	1.02	2	1	1	1	1181	135.903	8.82178	Baz1b
