# Supplementary material for: RORγt+ APCs require a distinct cis-regulatory element to instruct tolerance to dietary antigens
Source: Research Square preprint supplement (doi:10.21203/rs.3.rs-4865841/v1), 2025-08-01
Supplement: Supplementary file 3 [file 7927352e1fc60ad10da2c5d9.xlsx]

## Sheet: Table 6. GSEA 20-week-old mice
ID	Description	setSize	enrichmentScore	NES	pvalue	p.adjust	qvalue	rank	leading_edge	core_enrichment
N.brasiliensis_UP	N.brasiliensis_UP	271	0.695736	3.42469	1e-10	7.74e-08	6.87368e-08	2204	tags=52%	list=12%	signal=46%	Gsdmc3/Gsdmc2/Gsdmc4/Capn13/Fut2/Duox2/Ang4/Nebl/Ms4a2/Mecom/Duoxa2/Cpvl/Ceacam2/Pla2g4c/Clca2/Mcpt2/Cd55/Sprr2a3/Me1/Mcpt1/Sh2d6/Alox5/Rgs22/Pou2f3/Spta1/Egln3/Gpx2/Glce/Dclk1/Rgs13/Strip2/Tmem229a/Trpm5/Hmx3/Prss53/Cpa3/Sprr2a1/Acss1/Avil/Pik3r5/Pgap1/Retnlb/Sema5b/Sucnr1/Pnpla3/Slc28a1/Sh2d7/Kcnj16/Mcpt4/Pnliprp2/Oxct1/Plcb2/Cma2/Fn1/Cd34/Ly6g6d/Car7/Fer1l4/Sprr2a2/Rsad1/Siglecf/Ptgs2/Prdm13/A…
REACTOME_ASSEMBLY_OF_COLLAGEN_FIBRILS_AND_OTHER_MULTIMERIC_STRUCTURES	REACTOME_ASSEMBLY_OF_COLLAGEN_FIBRILS_AND_OTHER_MULTIMERIC_STRUCTURES	49	0.588236	2.20636	5.27359e-06	0.000453529	0.000402767	2640	tags=55%	list=15%	signal=47%	Col6a2/Col18a1/Col8a1/Col6a1/Col3a1/Col5a1/Loxl2/Tll1/Col4a2/Loxl1/Col1a1/Col4a1/Col14a1/Col15a1/Pxdn/Col1a2/Col6a3/Col2a1/Col12a1/Loxl3/Bmp1/Mmp9/Col10a1/Tll2/Col4a6/Col4a4/Mmp13
REACTOME_COLLAGEN_BIOSYNTHESIS_AND_MODIFYING_ENZYMES	REACTOME_COLLAGEN_BIOSYNTHESIS_AND_MODIFYING_ENZYMES	61	0.54782	2.17001	5.02637e-06	0.000453529	0.000402767	2534	tags=49%	list=14%	signal=42%	Adamts2/Col6a2/Col18a1/Col8a1/Col6a1/P4ha2/Col3a1/Col5a1/Tll1/Col4a2/Col1a1/Col4a1/Col14a1/Col15a1/Col1a2/Col6a3/Col19a1/Col2a1/Col12a1/Pcolce2/P3h2/Serpinh1/Col13a1/Bmp1/Col23a1/Adamts14/Col10a1/Tll2/Col4a6/Col4a4
REACTOME_ELASTIC_FIBRE_FORMATION	REACTOME_ELASTIC_FIBRE_FORMATION	38	0.603965	2.1614	4.9011e-05	0.00252897	0.00224591	2729	tags=55%	list=15%	signal=47%	Emilin2/Fn1/Fbn1/Itga5/Fbln2/Loxl2/Itga8/Loxl1/Tgfb3/Fbln5/Ltbp4/Ltbp1/Mfap5/Loxl3/Emilin1/Bmp4/Itgb6/Itgav/Itgb3/Bmp2/Vtn
REACTOME_DEGRADATION_OF_THE_EXTRACELLULAR_MATRIX	REACTOME_DEGRADATION_OF_THE_EXTRACELLULAR_MATRIX	108	0.484076	2.11527	3.97827e-07	7.09513e-05	6.301e-05	2655	tags=44%	list=15%	signal=37%	Capn13/Tpsb2/Capn6/Mmp19/Col6a2/Fn1/Fbn1/Col18a1/Mmp17/Col8a1/Bcan/Col6a1/Mmp2/Adamts5/Col3a1/Col5a1/Mmp10/Col4a2/Col1a1/Col4a1/Cma1/Mmp15/Nid1/Col15a1/Capn9/Tmprss6/Plg/Col1a2/Col6a3/Col19a1/Col2a1/Klk1b5/Prss2/Col12a1/Scube3/Mmp24/Col13a1/Htra1/Mmp9/Ctsk/Klk1/Col10a1/Capn11/Col4a6/Col4a4/Mmp13/Scube1
REACTOME_CROSSLINKING_OF_COLLAGEN_FIBRILS	REACTOME_CROSSLINKING_OF_COLLAGEN_FIBRILS	18	0.717473	2.11283	0.000550965	0.0177686	0.0157798	3050	tags=78%	list=17%	signal=64%	Loxl2/Tll1/Col4a2/Loxl1/Col1a1/Col4a1/Pxdn/Col1a2/Loxl3/Bmp1/Tll2/Col4a6/Col4a4/Col4a5
REACTOME_COLLAGEN_DEGRADATION	REACTOME_COLLAGEN_DEGRADATION	50	0.560568	2.10358	2.26165e-05	0.00145877	0.00129549	2640	tags=52%	list=15%	signal=44%	Col6a2/Col18a1/Col8a1/Col6a1/Mmp2/Col3a1/Col5a1/Mmp10/Col4a2/Col1a1/Col4a1/Mmp15/Col15a1/Tmprss6/Col1a2/Col6a3/Col19a1/Col2a1/Col12a1/Col13a1/Mmp9/Ctsk/Col10a1/Col4a6/Col4a4/Mmp13
REACTOME_COLLAGEN_FORMATION	REACTOME_COLLAGEN_FORMATION	75	0.510237	2.09041	8.38361e-06	0.000589901	0.000523875	2640	tags=48%	list=15%	signal=41%	Adamts2/Col6a2/Col18a1/Col8a1/Col6a1/P4ha2/Col3a1/Col5a1/Loxl2/Tll1/Col4a2/Loxl1/Col1a1/Col4a1/Col14a1/Col15a1/Pxdn/Col1a2/Col6a3/Col19a1/Col2a1/Col12a1/Pcolce2/P3h2/Serpinh1/Loxl3/Col13a1/Bmp1/Mmp9/Col23a1/Adamts14/Col10a1/Tll2/Col4a6/Col4a4/Mmp13
REACTOME_COLLAGEN_CHAIN_TRIMERIZATION	REACTOME_COLLAGEN_CHAIN_TRIMERIZATION	41	0.570261	2.05133	0.000162863	0.00703439	0.00624705	2534	tags=51%	list=14%	signal=44%	Col6a2/Col18a1/Col8a1/Col6a1/Col3a1/Col5a1/Col4a2/Col1a1/Col4a1/Col14a1/Col15a1/Col1a2/Col6a3/Col19a1/Col2a1/Col12a1/Col13a1/Col23a1/Col10a1/Col4a6/Col4a4
REACTOME_XENOBIOTICS	REACTOME_XENOBIOTICS	24	0.637847	2.00128	0.0012536	0.0373187	0.0331418	2806	tags=33%	list=16%	signal=28%	Cyp2e1/Cyp2c29/Ahrr/Cyp1a1/Cyp2a12/Cyp3a41b/Cyp3a44/Cyp2d22
REACTOME_EXTRACELLULAR_MATRIX_ORGANIZATION	REACTOME_EXTRACELLULAR_MATRIX_ORGANIZATION	235	0.408119	1.96497	7.95386e-10	3.07814e-07	2.73361e-07	2729	tags=40%	list=15%	signal=34%	Capn13/Tpsb2/Capn6/Emilin2/Mmp19/Adamts2/Col6a2/Fn1/Fbn1/Col18a1/Mmp17/Col8a1/Bcan/Vwf/Col6a1/P4ha2/Mmp2/Lama4/Adamts5/Itga5/Fbln2/Col3a1/Col5a1/Itga2b/Tnc/Loxl2/Itga6/Itga8/Mmp10/Tll1/Col4a2/Loxl1/Itga11/Tgfb3/Col1a1/Fbln5/Col4a1/Cma1/Mmp15/Ibsp/Col14a1/Ltbp4/Nid1/Col15a1/Pxdn/Capn9/Tmprss6/Plg/Col1a2/Col6a3/Col19a1/Col2a1/Klk1b5/Prss2/Ltbp1/Nid2/Mfap5/Col12a1/Pcolce2/Itga9/Itga7/P3h2/Serpinh1/L…
REACTOME_MOLECULES_ASSOCIATED_WITH_ELASTIC_FIBRES	REACTOME_MOLECULES_ASSOCIATED_WITH_ELASTIC_FIBRES	31	0.583836	1.94631	0.000332967	0.013564	0.0120458	3436	tags=65%	list=19%	signal=52%	Emilin2/Fn1/Fbn1/Fbln2/Itga8/Tgfb3/Fbln5/Ltbp4/Ltbp1/Mfap5/Emilin1/Bmp4/Itgb6/Itgav/Itgb3/Bmp2/Vtn/Mfap4/Mfap2/Itgb1
REACTOME_ECM_PROTEOGLYCANS	REACTOME_ECM_PROTEOGLYCANS	44	0.522527	1.89653	0.000471657	0.0165938	0.0147365	3009	tags=57%	list=17%	signal=47%	Col6a2/Fn1/Bcan/Col6a1/Col3a1/Col5a1/Itga2b/Tnc/Itga8/Col1a1/Col1a2/Col6a3/Col2a1/Itga9/Itga7/Comp/Tnxb/Itgb6/Itgav/App/Itgb3/Vcan/Vtn/Col5a2/Sparc
REACTOME_NON_INTEGRIN_MEMBRANE_ECM_INTERACTIONS	REACTOME_NON_INTEGRIN_MEMBRANE_ECM_INTERACTIONS	32	0.560494	1.86897	0.00116189	0.0359722	0.0319459	3050	tags=59%	list=17%	signal=49%	Fn1/Col3a1/Col5a1/Itga6/Col4a2/Col1a1/Col4a1/Col1a2/Col2a1/Col10a1/Ddr2/Itgav/Col4a6/Itgb4/Col4a4/Itgb3/Vtn/Col5a2/Col4a5
REACTOME_LAMININ_INTERACTIONS	REACTOME_LAMININ_INTERACTIONS	15	0.637391	1.81234	0.0137805	0.174854	0.155283	3650	tags=87%	list=21%	signal=69%	Lama4/Itga6/Col4a2/Col4a1/Nid1/Nid2/Itga7/Col4a6/Itgb4/Col4a4/Col4a5/Itgb1/Itga3
REACTOME_ARACHIDONIC_ACID_METABOLISM	REACTOME_ARACHIDONIC_ACID_METABOLISM	54	0.464253	1.77575	0.00171309	0.0457218	0.0406043	2330	tags=30%	list=13%	signal=26%	Pon1/Alox5/Gpx2/Aloxe3/Ptgs2/Cyp2u1/Alox12/Alox5ap/Cyp1a1/Ptgds/Alox8/Cyp4f15/Pla2g4a/Cyp4b1/Ptgs1/Dpep3
REACTOME_MET_ACTIVATES_PTK2_SIGNALING	REACTOME_MET_ACTIVATES_PTK2_SIGNALING	19	0.595822	1.77236	0.0130865	0.169939	0.150918	4149	tags=74%	list=23%	signal=56%	Fn1/Lama4/Col3a1/Col5a1/Col1a1/Col1a2/Col2a1/Met/Hgf/Col5a2/Itgb1/Itga3/Src/Itga2
REACTOME_NCAM1_INTERACTIONS	REACTOME_NCAM1_INTERACTIONS	20	0.5921	1.77094	0.00988865	0.147189	0.130714	1272	tags=40%	list=7%	signal=37%	Col6a2/Col6a1/Col3a1/Col5a1/Col4a2/Col4a1/Col6a3/Col2a1
REACTOME_O_GLYCOSYLATION_OF_TSR_DOMAIN_CONTAINING_PROTEINS	REACTOME_O_GLYCOSYLATION_OF_TSR_DOMAIN_CONTAINING_PROTEINS	39	0.494392	1.76238	0.00376271	0.0832097	0.0738963	3180	tags=46%	list=18%	signal=38%	Adamts9/Sema5b/Adamts2/Spon1/Adamts12/Thsd7a/Adamts5/Thsd4/Adamtsl3/Adamtsl1/Adamts1/Adamtsl4/Adamts14/Adamts17/Sbspon/Adamts6/Adamts15/Adamts4
REACTOME_MET_PROMOTES_CELL_MOTILITY	REACTOME_MET_PROMOTES_CELL_MOTILITY	30	0.525746	1.75697	0.00410559	0.0873008	0.0775295	4316	tags=60%	list=24%	signal=45%	Fn1/Lama4/Col3a1/Col5a1/Col1a1/Col1a2/Col2a1/Tns4/Met/Dock7/Crk/Hgf/Col5a2/Itgb1/Itga3/Src/Itga2/Crkl
REACTOME_TIE2_SIGNALING	REACTOME_TIE2_SIGNALING	17	0.607611	1.7562	0.0125627	0.169939	0.150918	86	tags=12%	list=0%	signal=12%	Angpt4/Angpt1
REACTOME_METABOLISM_OF_NITRIC_OXIDE_NOS3_ACTIVATION_AND_REGULATION	REACTOME_METABOLISM_OF_NITRIC_OXIDE_NOS3_ACTIVATION_AND_REGULATION	15	0.612634	1.74195	0.0211589	0.240838	0.213882	1153	tags=27%	list=7%	signal=25%	Nos3/Cav1/Dnm2/Cygb
REACTOME_SIGNAL_TRANSDUCTION_BY_L1	REACTOME_SIGNAL_TRANSDUCTION_BY_L1	19	0.584921	1.73994	0.0166881	0.201822	0.179233	3436	tags=37%	list=19%	signal=30%	Itga5/Itga2b/Egfr/Itga9/Itgav/Itgb3/Itgb1
REACTOME_INTEGRIN_CELL_SURFACE_INTERACTIONS	REACTOME_INTEGRIN_CELL_SURFACE_INTERACTIONS	74	0.424839	1.73735	0.00146793	0.0405779	0.0360361	2729	tags=42%	list=15%	signal=36%	Col6a2/Fn1/Fbn1/Col18a1/Col8a1/Vwf/Col6a1/Itga5/Col3a1/Col5a1/Itga2b/Tnc/Itga6/Itga8/Col4a2/Itga11/Col1a1/Col4a1/Ibsp/Col1a2/Col6a3/Col2a1/Itga9/Col13a1/Comp/Itgb6/Itgav/Col4a6/Col4a4/Itgb3/Vtn
REACTOME_SIGNALING_BY_PDGF	REACTOME_SIGNALING_BY_PDGF	56	0.44509	1.72371	0.00272177	0.0619602	0.0550252	4045	tags=50%	list=23%	signal=39%	Col6a2/Col6a1/Col3a1/Col5a1/Thbs3/Col4a2/Col4a1/Plg/Col6a3/Col2a1/Pdgfrb/Pdgfra/Nck2/Col4a4/Crk/Col5a2/Col4a5/Bcar1/Ptpn12/Thbs1/Pik3r1/Thbs4/Rasa1/Stat6/Col9a2/Kras/Src/Pdgfd
REACTOME_BIOSYNTHESIS_OF_SPECIALIZED_PRORESOLVING_MEDIATORS_SPMS	REACTOME_BIOSYNTHESIS_OF_SPECIALIZED_PRORESOLVING_MEDIATORS_SPMS	24	0.508609	1.59579	0.0294442	0.280208	0.248845	1280	tags=29%	list=7%	signal=27%	Alox5/Cyp2e1/Ptgs2/Alox12/Alox5ap/Cyp1a1/Cyp3a41b
REACTOME_SYNAPTIC_ADHESION_LIKE_MOLECULES	REACTOME_SYNAPTIC_ADHESION_LIKE_MOLECULES	20	0.532576	1.5929	0.0318044	0.280208	0.248845	3528	tags=45%	list=20%	signal=36%	Grin2a/Lrfn1/Gria1/Dlg4/Gria4/Dlg3/Gria3/Flot1/Ptprf
REACTOME_G_ALPHA_Q_SIGNALLING_EVENTS	REACTOME_G_ALPHA_Q_SIGNALLING_EVENTS	195	0.333091	1.57574	0.00016359	0.00703439	0.00624705	1794	tags=25%	list=10%	signal=23%	Pmch/Nmur1/Nmur2/Rgs13/Dgkd/Plcb2/Avpr1a/Gnb3/Prok1/Tacr3/Dgki/Hcrtr1/F2rl3/Bdkrb2/Nmu/Gng3/Gng13/Grp/Tacr1/P2ry2/Ffar3/Gcgr/Ednrb/P2ry6/Adra1b/Ednra/Mgll/Plcb1/Kng2/Qrfp/Egfr/Itpr2/F2r/Cckar/Chrm5/Gpr143/Htr2c/Opn4/Prokr2/Uts2r/Abhd12/Adra1d/Htr2a/P2ry1/Cysltr1/Tacr2/Mchr1/Grpr/Anxa1
REACTOME_CARDIAC_CONDUCTION	REACTOME_CARDIAC_CONDUCTION	96	0.367816	1.57226	0.00695041	0.119547	0.106166	3988	tags=52%	list=23%	signal=41%	Cacng6/Kcnip3/Cacna2d2/Atp2b2/Kcne3/Kcnk5/Casq2/Atp2b1/Itpr2/Atp1a4/Fxyd4/Kcne2/Kcnj4/Kcnk7/Kcnj2/Atp1a2/Cacng7/Kcnd3/Kcnk4/Npr1/Corin/Kcnq1/Fxyd2/Cacna1c/Fxyd1/Ces1d/Ahcyl1/Slc8a3/Kcnk1/Atp1b1/Atp2b4/Slc8a2/Atp2a3/Atp1a1/Dmpk/Npr2/Itpr3/Kcnd2/Kcnk6/Atp2a2/Camk2d/Camk2b/Kcnk2/Kcnk13/Fkbp1b/Kcnip2/Kcnk12/Sri/Camk2g/Kcnd1
REACTOME_BLOOD_GROUP_SYSTEMS_BIOSYNTHESIS	REACTOME_BLOOD_GROUP_SYSTEMS_BIOSYNTHESIS	15	0.552069	1.56974	0.0504079	0.319801	0.284007	1642	tags=40%	list=9%	signal=36%	Fut2/B3galt2/St3gal6/St6galnac6/Fut10/B3galt1
REACTOME_SIGNALING_BY_ERYTHROPOIETIN	REACTOME_SIGNALING_BY_ERYTHROPOIETIN	16	0.54804	1.56803	0.0744958	0.396093	0.35176	900	tags=31%	list=5%	signal=30%	Pik3r5/Irs2/Jak2/Epor/Pik3cg
REACTOME_RHOB_GTPASE_CYCLE	REACTOME_RHOB_GTPASE_CYCLE	68	0.384523	1.56483	0.0102773	0.150088	0.133289	3983	tags=50%	list=22%	signal=39%	Actc1/Stard8/Pcdh7/Cav1/Daam1/Sowahc/Rhpn2/Stk10/Arhgef10/Pkn2/Arhgef5/Mcam/Arhgap21/Rock2/Tfrc/Dlc1/Slk/Arhgap5/Arhgef11/Mcf2l/Net1/Arhgap35/Cavin1/Rhob/Arhgef17/Anln/Bcr/Flot1/Rock1/Pik3r1/Vangl1/Arhgef3/Arhgap26/Jup
REACTOME_CYTOCHROME_P450_ARRANGED_BY_SUBSTRATE_TYPE	REACTOME_CYTOCHROME_P450_ARRANGED_BY_SUBSTRATE_TYPE	61	0.387054	1.53319	0.0183471	0.213624	0.189713	2139	tags=23%	list=12%	signal=20%	Cyp2e1/Cyp11a1/Cyp26a1/Cyp2u1/Cyp2c29/Cyp26b1/Cyp7b1/Ahrr/Cyp1a1/Cyp2a12/Cyp3a41b/Cyp4f15/Cyp4b1/Cyp3a44
REACTOME_KERATINIZATION	REACTOME_KERATINIZATION	60	0.383741	1.51563	0.0246374	0.250912	0.222828	1595	tags=27%	list=9%	signal=24%	Krt79/Casp14/Krt80/Krt13/Krtap3-1/Krt27/Krt23/Dsg2/Krt12/Krt84/Dsg4/Evpl/Gm11562/Krt5/Stfa2/Dsc2
REACTOME_O_LINKED_GLYCOSYLATION	REACTOME_O_LINKED_GLYCOSYLATION	102	0.348912	1.51413	0.00825827	0.135998	0.120776	2673	tags=28%	list=15%	signal=24%	Galnt14/Adamts9/Sema5b/Adamts2/Spon1/Adamts12/Thsd7a/Gcnt7/Muc5b/Adamts5/B4galt6/Thsd4/Adamtsl3/C1galt1/Adamtsl1/A4gnt/B4galt5/Muc16/Adamts1/Galnt13/Adamtsl4/Gcnt4/Adamts14/Large1/Adamts17/Galnt15/Galnt6/St3gal1/Sbspon
REACTOME_MUSCLE_CONTRACTION	REACTOME_MUSCLE_CONTRACTION	152	0.322952	1.50741	0.00600021	0.108004	0.0959153	4119	tags=46%	list=23%	signal=36%	Actc1/Cacng6/Kcnip3/Cacna2d2/Atp2b2/Vcl/Kcne3/Kcnk5/Actn3/Casq2/Lmod1/Atp2b1/Itpr2/Atp1a4/Fxyd4/Kcne2/Kcnj4/Kcnk7/Myh6/Kcnj2/Atp1a2/Acta1/Cacng7/Kcnd3/Kcnk4/Myh3/Npr1/Actg2/Corin/Myl6b/Kcnq1/Fxyd2/Cacna1c/Fxyd1/Ces1d/Ahcyl1/Slc8a3/Kcnk1/Atp1b1/Atp2b4/Slc8a2/Atp2a3/Atp1a1/Tmod3/Dmpk/Npr2/Itpr3/Kcnd2/Kcnk6/Des/Mybpc3/Atp2a2/Camk2d/Sorbs1/Camk2b/Kcnk2/Myh11/Pak2/Acta2/Kcnk13/Pde5a/Fkbp1b/Kcnip2/Kcnk…
REACTOME_FORMATION_OF_THE_CORNIFIED_ENVELOPE	REACTOME_FORMATION_OF_THE_CORNIFIED_ENVELOPE	54	0.388462	1.48585	0.0236542	0.250912	0.222828	1595	tags=26%	list=9%	signal=24%	Krt79/Casp14/Krt80/Krt13/Krt27/Krt23/Dsg2/Krt12/Krt84/Dsg4/Evpl/Krt5/Stfa2/Dsc2
REACTOME_PYRUVATE_METABOLISM	REACTOME_PYRUVATE_METABOLISM	42	0.40878	1.47679	0.0362423	0.282752	0.251104	4091	tags=40%	list=23%	signal=31%	Me1/Pcx/Dlat/Me3/Rmnd5a/Ubc/Pdpr/Hagh/Pkm/Pdha1/Pdhb/Ldhal6b/Ldha/Mkln1/Vdac1/Armc8/Dld
REACTOME_VEGFR2_MEDIATED_VASCULAR_PERMEABILITY	REACTOME_VEGFR2_MEDIATED_VASCULAR_PERMEABILITY	29	0.444784	1.46981	0.0406827	0.28368	0.251928	4565	tags=48%	list=26%	signal=36%	Nos3/Cav1/Them4/Cdh5/Ctnnb1/Pdpk1/Vav3/Trib3/Ctnna1/Pak2/Hsp90aa1/Jup/Ctnnd1/Mapkap1
REACTOME_GLYCOSPHINGOLIPID_BIOSYNTHESIS	REACTOME_GLYCOSPHINGOLIPID_BIOSYNTHESIS	18	0.498772	1.46879	0.127284	0.496154	0.440621	2923	tags=44%	list=16%	signal=37%	Fut2/B4galt6/St6galnac6/B4galt5/A4galt/St6galnac5/Ugcg/St3gal5
REACTOME_PHASE_4_RESTING_MEMBRANE_POTENTIAL	REACTOME_PHASE_4_RESTING_MEMBRANE_POTENTIAL	16	0.502694	1.43829	0.0750751	0.396093	0.35176	3905	tags=62%	list=22%	signal=49%	Kcnk5/Kcnj4/Kcnk7/Kcnj2/Kcnk4/Kcnk1/Kcnk6/Kcnk2/Kcnk13/Kcnk12
REACTOME_ACTIVATION_OF_MATRIX_METALLOPROTEINASES	REACTOME_ACTIVATION_OF_MATRIX_METALLOPROTEINASES	33	0.419364	1.42708	0.0515981	0.322072	0.286023	2191	tags=42%	list=12%	signal=37%	Tpsb2/Col18a1/Mmp17/Mmp2/Mmp10/Cma1/Mmp15/Plg/Klk1b5/Prss2/Mmp24/Mmp9/Ctsk/Klk1
REACTOME_NCAM_SIGNALING_FOR_NEURITE_OUT_GROWTH	REACTOME_NCAM_SIGNALING_FOR_NEURITE_OUT_GROWTH	38	0.397692	1.42321	0.0571432	0.337625	0.299835	1272	tags=24%	list=7%	signal=22%	Spta1/Col6a2/Col6a1/Col3a1/Col5a1/Col4a2/Col4a1/Col6a3/Col2a1
REACTOME_G_BETA_GAMMA_SIGNALLING_THROUGH_PI3KGAMMA	REACTOME_G_BETA_GAMMA_SIGNALLING_THROUGH_PI3KGAMMA	25	0.445412	1.40669	0.0889144	0.425419	0.377803	3442	tags=48%	list=19%	signal=39%	Pik3r5/Gnb3/Gng3/Gng13/Pik3cg/Pik3r6/Gnb5/Gnb1/Pdpk1/Gngt1/Gng8/Gnb4
REACTOME_NUCLEAR_RECEPTOR_TRANSCRIPTION_PATHWAY	REACTOME_NUCLEAR_RECEPTOR_TRANSCRIPTION_PATHWAY	45	0.377494	1.39236	0.0670223	0.370537	0.329064	3921	tags=47%	list=22%	signal=36%	Rorb/Ppard/Ppara/Esrrb/Nr1d1/Vdr/Nr1d2/Nr3c2/Esr1/Nr4a2/Thrb/Nr0b2/Nr2f1/Rara/Rxrg/Nr1h4/Nr5a2/Ncor2/Nr1i2/Nr2c2/Rarb
REACTOME_SIGNALING_BY_MET	REACTOME_SIGNALING_BY_MET	67	0.345029	1.38816	0.0393105	0.282752	0.251104	3650	tags=34%	list=21%	signal=27%	Fn1/Lama4/Col3a1/Col5a1/Col1a1/Col1a2/Col2a1/Tns4/Ubc/Met/Hgfac/Dock7/Sh3gl3/Crk/Hgs/Hgf/Col5a2/Stam2/Stam/Itgb1/Pik3r1/Usp8/Itga3
REACTOME_EXTRA_NUCLEAR_ESTROGEN_SIGNALING	REACTOME_EXTRA_NUCLEAR_ESTROGEN_SIGNALING	69	0.338876	1.3768	0.0315064	0.280208	0.248845	4039	tags=45%	list=23%	signal=35%	Gnb3/Mmp2/Gng3/Btc/Gng13/Nos3/Epgn/Cav1/Egfr/Foxo3/Gnai1/Ereg/Cav2/Esr1/Mmp9/Pik3r3/Tgfa/Gnai3/Gnb5/Gnb1/Pdpk1/Gngt1/Gng8/Gnb4/Pik3r1/Hspb1/Hsp90aa1/Zdhhc21/Kras/Src/Strn
REACTOME_G_PROTEIN_BETA_GAMMA_SIGNALLING	REACTOME_G_PROTEIN_BETA_GAMMA_SIGNALLING	32	0.411851	1.37332	0.0709183	0.383852	0.340888	930	tags=22%	list=5%	signal=21%	Pik3r5/Plcb2/Gnb3/Gng3/Gng13/Pik3cg/Plcb1
REACTOME_CELLULAR_HEXOSE_TRANSPORT	REACTOME_CELLULAR_HEXOSE_TRANSPORT	17	0.473371	1.3682	0.0977918	0.451561	0.401019	2572	tags=59%	list=15%	signal=50%	Slc2a12/Fgf21/Slc2a2/Slc2a8/Slc5a4a/Slc2a1/Slc2a10/Slc5a9/Slc5a1/Slc2a4
REACTOME_SIGNALING_BY_RECEPTOR_TYROSINE_KINASES	REACTOME_SIGNALING_BY_RECEPTOR_TYROSINE_KINASES	401	0.263724	1.36298	0.000428825	0.0158052	0.0140362	2691	tags=21%	list=15%	signal=18%	Fgfbp3/Ide/Ntf5/Mst1/Fgf7/Ntrk2/Igf1/Col6a2/Fn1/Flrt3/Nrg1/Col6a1/Matk/Fam83b/Kitl/Lama4/Flrt2/Fgf15/Col3a1/Col5a1/Btc/Pcsk6/Nos3/Thbs3/Col4a2/Flt4/Flt1/Shb/Irs2/Col1a1/Col4a1/Jak2/Atp6v0a4/Cma1/Tgfbr3/Epgn/Cav1/Dusp4/Egfr/Grb10/Plg/Col1a2/Col6a3/Col2a1/Spred2/Erbb4/Pdgfrb/Ereg/Abi2/Tns4/Pgf/Spry2/Ubc/Aph1b/Pdgfra/Esr1/Met/Mmp9/Dusp6/Them4/Mst1r/Hgfac/Fgf10/Fer/Pik3r3/Cdh5/Ralgds/Spry1/Rock2/Nck2…
REACTOME_PRESYNAPTIC_FUNCTION_OF_KAINATE_RECEPTORS	REACTOME_PRESYNAPTIC_FUNCTION_OF_KAINATE_RECEPTORS	21	0.453775	1.3597	0.123619	0.496154	0.440621	930	tags=24%	list=5%	signal=23%	Plcb2/Gnb3/Gng3/Gng13/Plcb1
REACTOME_DIGESTION_AND_ABSORPTION	REACTOME_DIGESTION_AND_ABSORPTION	19	0.452735	1.34673	0.103226	0.461831	0.41014	2441	tags=42%	list=14%	signal=36%	Pnliprp2/Sis/Chit1/Npc1l1/Clps/Slc2a2/Pnliprp1/Slc5a1
REACTOME_GLYCOGEN_METABOLISM	REACTOME_GLYCOGEN_METABOLISM	17	0.465449	1.34531	0.113565	0.496154	0.440621	1880	tags=24%	list=11%	signal=21%	Pygl/Ppp1r3c/Phkg1/Gbe1
REACTOME_CELL_EXTRACELLULAR_MATRIX_INTERACTIONS	REACTOME_CELL_EXTRACELLULAR_MATRIX_INTERACTIONS	18	0.45061	1.32696	0.118971	0.496154	0.440621	4416	tags=61%	list=25%	signal=46%	Flnc/Fblim1/Flna/Parvb/Fermt2/Itgb1/Actn1/Tesk1/Rsu1/Lims2/Pxn
REACTOME_RHO_GTPASES_ACTIVATE_PKNS	REACTOME_RHO_GTPASES_ACTIVATE_PKNS	22	0.43708	1.32626	0.0979021	0.451561	0.401019	3158	tags=36%	list=18%	signal=30%	Ppp1r14a/Pkn2/Sfn/Ppp1r12b/Ywhaq/Ppp1r12a/Rhob/Pdpk1
REACTOME_NUCLEOTIDE_LIKE_PURINERGIC_RECEPTORS	REACTOME_NUCLEOTIDE_LIKE_PURINERGIC_RECEPTORS	15	0.463242	1.31717	0.139942	0.50379	0.447402	1758	tags=40%	list=10%	signal=36%	P2ry14/P2ry2/P2ry6/Adora3/P2ry1/Adora2b
REACTOME_FATTY_ACID_METABOLISM	REACTOME_FATTY_ACID_METABOLISM	159	0.280618	1.31362	0.0290054	0.280208	0.248845	2907	tags=21%	list=16%	signal=18%	Pon1/Alox5/Gpx2/Aloxe3/Acsl3/Acsf2/Thrsp/Ptgs2/Cyp2u1/Ppard/Alox12/Alox5ap/Prkaa2/Cyp1a1/Elovl3/Ptgds/Alox8/Cyp4f15/Elovl6/Pla2g4a/Crat/Cyp4b1/Them4/Ptgs1/Acsl5/Fasn/Dpep3/Cpt1b/Acot7/Mcee/Ggt1/Ehhadh/Nudt19
REACTOME_ACTIVATION_OF_KAINATE_RECEPTORS_UPON_GLUTAMATE_BINDING	REACTOME_ACTIVATION_OF_KAINATE_RECEPTORS_UPON_GLUTAMATE_BINDING	32	0.39047	1.30202	0.10042	0.455704	0.404698	930	tags=19%	list=5%	signal=18%	Plcb2/Gnb3/Gng3/Gng13/Dlg4/Plcb1
REACTOME_SYNTHESIS_OF_PIPS_AT_THE_PLASMA_MEMBRANE	REACTOME_SYNTHESIS_OF_PIPS_AT_THE_PLASMA_MEMBRANE	50	0.345362	1.296	0.0800548	0.413868	0.367545	2786	tags=30%	list=16%	signal=25%	Pik3r5/Bmx/Pik3cg/Pik3c2g/Plekha3/Plekha1/Plekha5/Inppl1/Plekha8/Pip5k1b/Pik3r3/Mtmr6/Pik3r6/Plekha4/Plekha6
REACTOME_TRIGLYCERIDE_METABOLISM	REACTOME_TRIGLYCERIDE_METABOLISM	19	0.43339	1.28919	0.158065	0.546169	0.485038	2243	tags=37%	list=13%	signal=32%	Fabp4/Lpin2/Gpd2/Mogat1/Gk/Lpin1/Lpin3
REACTOME_WNT_LIGAND_BIOGENESIS_AND_TRAFFICKING	REACTOME_WNT_LIGAND_BIOGENESIS_AND_TRAFFICKING	24	0.409837	1.28588	0.12766	0.496154	0.440621	731	tags=17%	list=4%	signal=16%	Wnt16/Wnt10b/Wnt2b/Wnt9b
REACTOME_PHASE_I_FUNCTIONALIZATION_OF_COMPOUNDS	REACTOME_PHASE_I_FUNCTIONALIZATION_OF_COMPOUNDS	98	0.292738	1.26851	0.0807879	0.414105	0.367755	2632	tags=22%	list=15%	signal=19%	Cyp2e1/Acss1/Cyp11a1/Cyp26a1/Cyp2u1/Cyp2c29/Cyp26b1/Fmo1/Aoc3/Cyp7b1/Ahrr/Cyp1a1/Cyp2a12/Cyp3a41b/Smox/Cyp4f15/Cyp4b1/Ptgs1/Cyp3a44/Ces1d/Cbr3/Aoc2
REACTOME_GLYCOSPHINGOLIPID_METABOLISM	REACTOME_GLYCOSPHINGOLIPID_METABOLISM	49	0.337692	1.26662	0.121459	0.496154	0.440621	2179	tags=24%	list=12%	signal=22%	Fut2/Arsj/Glb1l2/B4galt6/Neu2/Neu3/St6galnac6/B4galt5/A4galt/Sts/St6galnac5/Smpd3
REACTOME_ATORVASTATIN_ADME	REACTOME_ATORVASTATIN_ADME	16	0.440874	1.26141	0.189189	0.590474	0.524384	2139	tags=38%	list=12%	signal=33%	Pon1/Abcc2/Abcb1a/Cyp3a41b/Ugt1a2/Cyp3a44
REACTOME_EGFR_DOWNREGULATION	REACTOME_EGFR_DOWNREGULATION	31	0.376005	1.25347	0.128205	0.496154	0.440621	3401	tags=48%	list=19%	signal=39%	Btc/Epgn/Egfr/Ereg/Spry2/Ubc/Spry1/Ptpn3/Sh3gl3/Tgfa/Hgs/Arhgef7/Stam2/Stam/Ptpn12
REACTOME_TGF_BETA_RECEPTOR_SIGNALING_ACTIVATES_SMADS	REACTOME_TGF_BETA_RECEPTOR_SIGNALING_ACTIVATES_SMADS	37	0.349597	1.24149	0.123636	0.496154	0.440621	2691	tags=32%	list=15%	signal=28%	Fbn1/Itga8/Tgfb3/Tgfbr3/Ltbp4/Ltbp1/Ubc/Pmepa1/Smad7/Itgb6/Itgav/Itgb3
REACTOME_TRANSPORT_OF_BILE_SALTS_AND_ORGANIC_ACIDS_METAL_IONS_AND_AMINE_COMPOUNDS	REACTOME_TRANSPORT_OF_BILE_SALTS_AND_ORGANIC_ACIDS_METAL_IONS_AND_AMINE_COMPOUNDS	68	0.30433	1.23849	0.13907	0.502992	0.446693	2399	tags=24%	list=14%	signal=20%	Slc30a10/Slc13a1/Slc13a4/Slc13a5/Slc13a3/Slc16a8/Slc44a3/Slc39a2/Slc16a3/Slc6a12/Slc6a5/Slc31a1/Slc16a1/Slc6a1/Slc6a6/Slc39a4
REACTOME_REGULATION_OF_TLR_BY_ENDOGENOUS_LIGAND	REACTOME_REGULATION_OF_TLR_BY_ENDOGENOUS_LIGAND	18	0.419594	1.23563	0.202572	0.598227	0.531269	12	tags=6%	list=0%	signal=6%	Sftpa1
REACTOME_GABA_B_RECEPTOR_ACTIVATION	REACTOME_GABA_B_RECEPTOR_ACTIVATION	43	0.34003	1.23135	0.124498	0.496154	0.440621	3442	tags=44%	list=19%	signal=36%	Kcnj16/Gnb3/Gng3/Gng13/Adcy5/Kcnj4/Adcy2/Gnai1/Kcnj2/Adcy8/Gnai3/Gnb5/Kcnj9/Gnb1/Gngt1/Adcy9/Gng8/Adcy4/Gnb4
REACTOME_SIGNAL_AMPLIFICATION	REACTOME_SIGNAL_AMPLIFICATION	33	0.357499	1.21656	0.167883	0.560093	0.497404	3631	tags=42%	list=20%	signal=34%	Gnb3/Gng3/Gng13/Gnai1/P2ry1/Pla2g4a/Gnai3/Gnb5/Gnb1/Gngt1/Gng8/Gnb4/Gna13/Gnaq
REACTOME_G_ALPHA_12_13_SIGNALLING_EVENTS	REACTOME_G_ALPHA_12_13_SIGNALLING_EVENTS	76	0.295645	1.21347	0.135874	0.497034	0.441403	3498	tags=43%	list=20%	signal=35%	Gnb3/Gng3/Gng13/Adra1b/Tiam2/Adra1d/Arhgef10/Arhgef26/Arhgef37/Arhgef5/Rock2/Arhgef11/Fgd4/Mcf2l/Arhgef19/Net1/Arhgef7/Gnb5/Kalrn/Arhgef38/Rhob/Plekhg2/Gnb1/Gngt1/Itsn1/Arhgef17/Gng8/Vav3/Rock1/Gnb4/Arhgef9/Ngef/Gna13
REACTOME_RESPONSE_TO_ELEVATED_PLATELET_CYTOSOLIC_CA2	REACTOME_RESPONSE_TO_ELEVATED_PLATELET_CYTOSOLIC_CA2	124	0.269311	1.21117	0.11084	0.490231	0.435361	2911	tags=30%	list=16%	signal=25%	Cfd/Orm1/Igf1/Fn1/Lhfpl2/Vwf/Vcl/Ecm1/Pros1/Itga2b/Endod1/Clec3b/Pcdh7/Tgfb3/Trf/Kng2/Aldoa/Plg/Ppbp/Mmrn1/Selp/Timp3/Nhlrc2/Tagln2/Flna/Rab27b/Itih4/Apoh/App/Itgb3/Cd9/Fam3c/Ola1/F13a1/Vegfa/Serping1/Hgf
REACTOME_REGULATION_OF_PYRUVATE_METABOLISM	REACTOME_REGULATION_OF_PYRUVATE_METABOLISM	32	0.361113	1.20413	0.169811	0.560231	0.497526	4091	tags=38%	list=23%	signal=29%	Me1/Dlat/Rmnd5a/Ubc/Pdpr/Pkm/Pdha1/Pdhb/Ldha/Mkln1/Armc8/Dld
REACTOME_EFFECTS_OF_PIP2_HYDROLYSIS	REACTOME_EFFECTS_OF_PIP2_HYDROLYSIS	25	0.381118	1.20364	0.193548	0.593088	0.526705	3402	tags=36%	list=19%	signal=29%	Dgkd/Dgki/Mgll/Itpr2/Abhd12/Dagla/Abhd6/Itpr3/Trpc6
REACTOME_ION_TRANSPORT_BY_P_TYPE_ATPASES	REACTOME_ION_TRANSPORT_BY_P_TYPE_ATPASES	51	0.319034	1.20007	0.12987	0.497034	0.441403	3974	tags=45%	list=22%	signal=35%	Atp10a/Atp2b2/Atp2b1/Atp1a4/Fxyd4/Atp1a2/Fxyd2/Atp7a/Fxyd1/Atp1b1/Atp2b4/Atp2a3/Atp1a1/Atp11b/Atp11c/Atp2a2/Atp7b/Camk2d/Camk2b/Atp2c2/Sri/Pdzd11/Camk2g
REACTOME_RHOC_GTPASE_CYCLE	REACTOME_RHOC_GTPASE_CYCLE	69	0.293747	1.19345	0.123762	0.496154	0.440621	4699	tags=51%	list=27%	signal=37%	Cav1/Daam1/Arhgap18/Stk10/Arhgef10/Pkn2/Arhgef5/Mcam/Arhgap21/Rock2/Tfrc/Dlc1/Slk/Arhgap5/Arhgef11/Mcf2l/Arhgap35/Cavin1/Arhgef17/Anln/Iqgap1/Bcr/Flot1/Rock1/Pik3r1/Vangl1/Abcd3/Arhgap26/Jup/Pkn1/Arhgap32/Abr/Arhgef25/Lman1/Erbin
REACTOME_ADP_SIGNALLING_THROUGH_P2Y_PURINOCEPTOR_12	REACTOME_ADP_SIGNALLING_THROUGH_P2Y_PURINOCEPTOR_12	22	0.392311	1.19042	0.199301	0.597683	0.530786	3442	tags=45%	list=19%	signal=37%	Gnb3/Gng3/Gng13/Gnai1/Gnai3/Gnb5/Gnb1/Gngt1/Gng8/Gnb4
REACTOME_TP53_REGULATES_METABOLIC_GENES	REACTOME_TP53_REGULATES_METABOLIC_GENES	66	0.293072	1.18688	0.140845	0.504695	0.448206	2473	tags=20%	list=14%	signal=17%	Gpx2/G6pdx/Prkaa2/Prdx1/Rptor/Gsr/Sesn1/Gls/Cycs/Sfn/Tigar/Ywhaq/Gpi1
REACTOME_COMMON_PATHWAY_OF_FIBRIN_CLOT_FORMATION	REACTOME_COMMON_PATHWAY_OF_FIBRIN_CLOT_FORMATION	18	0.402371	1.18491	0.247588	0.660805	0.586843	1178	tags=28%	list=7%	signal=26%	F10/Pros1/Thbd/Prtn3/F2r
REACTOME_RHOQ_GTPASE_CYCLE	REACTOME_RHOQ_GTPASE_CYCLE	58	0.301525	1.18123	0.130841	0.497034	0.441403	4051	tags=41%	list=23%	signal=32%	Gfod1/Cav1/Arl13b/Cdc42ep2/Arhgap21/Tfrc/Cdc42bpa/Dlc1/Gja1/Arhgap5/Git1/Cdc42bpb/Arhgap35/Arhgef7/Cdc42ep3/Itsn1/Iqgap1/Arhgef9/Pak2/Vangl1/Cpne8/Arhgap26/Jup/Plekhg3
REACTOME_DIGESTION	REACTOME_DIGESTION	15	0.415138	1.18039	0.259475	0.676208	0.600522	1796	tags=33%	list=10%	signal=30%	Pnliprp2/Sis/Chit1/Clps/Pnliprp1
REACTOME_GPER1_SIGNALING	REACTOME_GPER1_SIGNALING	27	0.361805	1.17143	0.209964	0.60639	0.538518	548	tags=19%	list=3%	signal=18%	Fn1/Gnb3/Itga5/Gng3/Gng13
REACTOME_PLATELET_ACTIVATION_SIGNALING_AND_AGGREGATION	REACTOME_PLATELET_ACTIVATION_SIGNALING_AND_AGGREGATION	250	0.24013	1.17128	0.0907895	0.427721	0.379848	3445	tags=33%	list=19%	signal=27%	Cfd/Dgkd/Orm1/Pik3r5/Igf1/Fn1/Gnb3/Lhfpl2/Vwf/Dgki/F2rl3/Vcl/Ecm1/Pros1/Itga2b/Gng3/Gng13/Endod1/Clec3b/Pcdh7/Tgfb3/Trf/Col1a1/Mpig6b/Mgll/Pik3cg/Kng2/Aldoa/Itpr2/Clec1b/F2r/Plg/Col1a2/Ppbp/Abhd12/Gnai1/Mmrn1/Selp/P2ry1/Pdpn/Timp3/Nhlrc2/Pla2g4a/Dagla/Tagln2/Flna/Pik3r3/Rab27b/Itih4/Apoh/Pik3r6/App/Crk/Itgb3/Cd9/Gnai3/Fam3c/Ola1/Gp1ba/F13a1/Gp5/Abhd6/Vegfa/Serping1/Hgf/Gnb5/Itpr3/Sparc/Rhob/Gnb1/…
REACTOME_KERATAN_SULFATE_KERATIN_METABOLISM	REACTOME_KERATAN_SULFATE_KERATIN_METABOLISM	32	0.348708	1.16277	0.211321	0.607843	0.539809	2556	tags=28%	list=14%	signal=24%	Glb1l2/B4galt6/Omd/St3gal6/Prelp/B4galt5/Ogn/Chst1/St3gal1
REACTOME_GLYCEROPHOSPHOLIPID_BIOSYNTHESIS	REACTOME_GLYCEROPHOSPHOLIPID_BIOSYNTHESIS	111	0.264557	1.16036	0.202121	0.598227	0.531269	2264	tags=19%	list=13%	signal=17%	Pla2g4c/Pnpla3/Lpin2/Gpd2/Miga2/Etnk1/Slc44a3/Mgll/Etnk2/Cpne6/Pla2r1/Pla2g3/Lpin1/Pla2g4a/Pnpla2/Miga1/Lpcat3/Etnppl/Lpin3/Phospho1/Cpne3
REACTOME_BINDING_AND_UPTAKE_OF_LIGANDS_BY_SCAVENGER_RECEPTORS	REACTOME_BINDING_AND_UPTAKE_OF_LIGANDS_BY_SCAVENGER_RECEPTORS	35	0.333612	1.15589	0.223443	0.62435	0.554469	3172	tags=31%	list=18%	signal=26%	Hp/Colec11/Apol9b/Hbb-bt/Apol8/Hbb-bs/Msr1/Hba-a1/Sparc/Cd163/Apol9a
REACTOME_INTEGRATION_OF_ENERGY_METABOLISM	REACTOME_INTEGRATION_OF_ENERGY_METABOLISM	72	0.283068	1.15559	0.163158	0.558635	0.496109	1154	tags=18%	list=7%	signal=17%	Adipoq/Plcb2/Acsl3/Gnb3/Cacna2d2/Gng3/Gng13/Gcgr/Plcb1/Prkaa2/Adcy5/Kcnb1/Itpr2
REACTOME_GLUCONEOGENESIS	REACTOME_GLUCONEOGENESIS	21	0.384356	1.15169	0.265734	0.683732	0.607204	3654	tags=48%	list=21%	signal=38%	Pcx/Aldoa/Pgam1/Gapdh/Gpi1/Pgk1/Tpi1/Pck1/Aldoc/Slc37a1
REACTOME_CA2_PATHWAY	REACTOME_CA2_PATHWAY	45	0.310419	1.14496	0.204819	0.598227	0.531269	3633	tags=38%	list=20%	signal=30%	Plcb2/Gnb3/Gng3/Gng13/Pde6b/Plcb1/Wnt5a/Ctnnb1/Gnb5/Fzd3/Gnb1/Gngt1/Gng8/Fzd4/Gnb4/Fzd5/Ppp3cb
REACTOME_SIGNALING_BY_FGFR	REACTOME_SIGNALING_BY_FGFR	71	0.281028	1.14121	0.190722	0.590474	0.524384	1766	tags=13%	list=10%	signal=11%	Fgfbp3/Fgf7/Flrt3/Flrt2/Fgf15/Tgfbr3/Spred2/Spry2/Ubc
REACTOME_PHOSPHOLIPID_METABOLISM	REACTOME_PHOSPHOLIPID_METABOLISM	186	0.240643	1.13803	0.189643	0.590474	0.524384	2786	tags=21%	list=16%	signal=18%	Pla2g4c/Pik3r5/Pnpla3/Lpin2/Gpd2/Miga2/Etnk1/Slc44a3/Bmx/Mgll/Etnk2/Pik3cg/Pik3c2g/Plekha3/Cpne6/Plekha1/Pla2r1/Pla2g3/Plekha5/Inppl1/Plekha8/Lpin1/Pla2g4a/Pnpla2/Miga1/Lpcat3/Pip5k1b/Etnppl/Pik3r3/Lpin3/Phospho1/Cpne3/Pnpla8/Mtmr6/Pik3c3/Pik3r6/Cpne7/Plekha4/Plekha6
REACTOME_O_LINKED_GLYCOSYLATION_OF_MUCINS	REACTOME_O_LINKED_GLYCOSYLATION_OF_MUCINS	53	0.298572	1.13624	0.207965	0.60328	0.535756	2556	tags=25%	list=14%	signal=21%	Galnt14/Gcnt7/Muc5b/B4galt6/C1galt1/A4gnt/B4galt5/Muc16/Galnt13/Gcnt4/Galnt15/Galnt6/St3gal1
REACTOME_SYNTHESIS_OF_VERY_LONG_CHAIN_FATTY_ACYL_COAS	REACTOME_SYNTHESIS_OF_VERY_LONG_CHAIN_FATTY_ACYL_COAS	19	0.379985	1.13033	0.3	0.7279	0.646428	2156	tags=21%	list=12%	signal=19%	Acsl3/Elovl3/Elovl6/Acsl5
REACTOME_ADRENALINE_NORADRENALINE_INHIBITS_INSULIN_SECRETION	REACTOME_ADRENALINE_NORADRENALINE_INHIBITS_INSULIN_SECRETION	23	0.364892	1.12963	0.254296	0.671757	0.596569	3442	tags=43%	list=19%	signal=35%	Gnb3/Gng3/Gng13/Adcy5/Gnai1/Gnb5/Gnb1/Gngt1/Gng8/Gnb4
REACTOME_BASIGIN_INTERACTIONS	REACTOME_BASIGIN_INTERACTIONS	23	0.362515	1.12227	0.271478	0.690153	0.612907	1715	tags=26%	list=10%	signal=24%	Slc7a10/Itga6/Slc16a8/Cav1/Slc16a3/Slc16a1
REACTOME_SURFACTANT_METABOLISM	REACTOME_SURFACTANT_METABOLISM	20	0.374156	1.11908	0.323129	0.748809	0.664997	1839	tags=30%	list=10%	signal=27%	Sftpa1/P2ry2/Adgrf5/Gata6/Adora2b/Lmcd1
REACTOME_GABA_RECEPTOR_ACTIVATION	REACTOME_GABA_RECEPTOR_ACTIVATION	55	0.289722	1.11716	0.230088	0.631897	0.56117	3443	tags=42%	list=19%	signal=34%	Gabrq/Gabrr2/Kcnj16/Gnb3/Gng3/Gng13/Adcy5/Kcnj4/Adcy2/Gnai1/Kcnj2/Adcy8/Gnai3/Gabra3/Gnb5/Kcnj9/Gnb1/Gngt1/Adcy9/Gng8/Adcy4/Gnb4/Arhgef9
REACTOME_SIGNALING_BY_EGFR	REACTOME_SIGNALING_BY_EGFR	49	0.297491	1.11583	0.231441	0.632987	0.562139	4017	tags=41%	list=23%	signal=32%	Fam83b/Btc/Epgn/Egfr/Ereg/Spry2/Ubc/Spry1/Ptpn3/Sh3gl3/Tgfa/Hgs/Arhgef7/Stam2/Stam/Ptpn12/Pik3r1/Kras/Src/Ptprk
REACTOME_FOXO_MEDIATED_TRANSCRIPTION	REACTOME_FOXO_MEDIATED_TRANSCRIPTION	20	0.368215	1.10131	0.336735	0.764141	0.678613	3886	tags=40%	list=22%	signal=31%	Foxo6/Foxo3/Sfn/Ywhaq/Sirt3/Smad3/Ep300/Sirt1
REACTOME_ADP_SIGNALLING_THROUGH_P2Y_PURINOCEPTOR_1	REACTOME_ADP_SIGNALLING_THROUGH_P2Y_PURINOCEPTOR_1	25	0.347886	1.09868	0.290323	0.712946	0.633148	3631	tags=44%	list=20%	signal=35%	Gnb3/Gng3/Gng13/P2ry1/Pla2g4a/Gnb5/Gnb1/Gngt1/Gng8/Gnb4/Gnaq
REACTOME_NEGATIVE_REGULATION_OF_THE_PI3K_AKT_NETWORK	REACTOME_NEGATIVE_REGULATION_OF_THE_PI3K_AKT_NETWORK	105	0.251563	1.09648	0.214724	0.611016	0.542627	2331	tags=23%	list=13%	signal=20%	Ntf5/Fgf7/Ntrk2/Il1rl1/Nrg1/Kitl/Fgf15/Btc/Irs2/Epgn/Egfr/Erbb4/Pdgfrb/Ereg/Phlpp2/Irak4/Pdgfra/Esr1/Met/Them4/Pip5k1b/Fgf10/Pik3r3/Fgf18
REACTOME_KERATAN_SULFATE_BIOSYNTHESIS	REACTOME_KERATAN_SULFATE_BIOSYNTHESIS	25	0.344337	1.08747	0.318996	0.745849	0.662369	2556	tags=32%	list=14%	signal=27%	B4galt6/Omd/St3gal6/Prelp/B4galt5/Ogn/Chst1/St3gal1
REACTOME_SPHINGOLIPID_METABOLISM	REACTOME_SPHINGOLIPID_METABOLISM	87	0.258106	1.08603	0.237288	0.639934	0.568308	3110	tags=25%	list=18%	signal=21%	Fut2/Arsj/Glb1l2/B4galt6/Aldh3b2/Mfsd2b/Neu2/Plpp3/Neu3/St6galnac6/B4galt5/A4galt/Samd8/Sts/St6galnac5/Smpd3/Ugcg/Sgms1/Sptssa/St3gal5/Asah2/Aldh3a2
REACTOME_NRAGE_SIGNALS_DEATH_THROUGH_JNK	REACTOME_NRAGE_SIGNALS_DEATH_THROUGH_JNK	51	0.288601	1.08559	0.290043	0.712946	0.633148	3858	tags=45%	list=22%	signal=35%	Tiam2/Arhgef10/Arhgef26/Arhgef37/Arhgef5/Arhgef11/Fgd4/Mcf2l/Arhgef19/Bcl2l11/Net1/Arhgef7/Kalrn/Arhgef38/Plekhg2/Itsn1/Arhgef17/Vav3/Arhgef9/Ngef/Gna13/Sos2/Arhgef3
REACTOME_AQUAPORIN_MEDIATED_TRANSPORT	REACTOME_AQUAPORIN_MEDIATED_TRANSPORT	36	0.307963	1.08417	0.320285	0.745849	0.662369	548	tags=14%	list=3%	signal=13%	Gnb3/Aqp7/Mip/Gng3/Gng13
REACTOME_INITIAL_TRIGGERING_OF_COMPLEMENT	REACTOME_INITIAL_TRIGGERING_OF_COMPLEMENT	19	0.364141	1.08319	0.348387	0.769947	0.683769	909	tags=16%	list=5%	signal=15%	Cfd/Colec11/Gzmm
REACTOME_PROSTACYCLIN_SIGNALLING_THROUGH_PROSTACYCLIN_RECEPTOR	REACTOME_PROSTACYCLIN_SIGNALLING_THROUGH_PROSTACYCLIN_RECEPTOR	19	0.360897	1.07354	0.36129	0.787715	0.699548	3442	tags=42%	list=19%	signal=34%	Gnb3/Gng3/Gng13/Gnb5/Gnb1/Gngt1/Gng8/Gnb4
REACTOME_FORMATION_OF_SENESCENCE_ASSOCIATED_HETEROCHROMATIN_FOCI_SAHF	REACTOME_FORMATION_OF_SENESCENCE_ASSOCIATED_HETEROCHROMATIN_FOCI_SAHF	16	0.371046	1.06162	0.366366	0.796538	0.707384	2362	tags=19%	list=13%	signal=16%	Hmga1b/Rb1/H1f5
REACTOME_METABOLISM_OF_CARBOHYDRATES	REACTOME_METABOLISM_OF_CARBOHYDRATES	246	0.218415	1.05952	0.320889	0.745849	0.662369	1649	tags=14%	list=9%	signal=13%	Fut2/Glb1l2/Pcx/Cspg4/Chst9/Bcan/G6pdx/B4galt6/Pygl/Slc26a2/B3galt2/Lyve1/Ppp1r3c/Phkg1/Hpse2/Hkdc1/Omd/Aldoa/Hs3st1/Gpc6/St3gal6/Pgm2/Gckr/Hs6st3/Sord/Dse/St6galnac6/Prelp/Fut10/B4galt5/Glyctk/Gpc2/B3galt1/Pgam1/Pfkfb2
REACTOME_PLATELET_HOMEOSTASIS	REACTOME_PLATELET_HOMEOSTASIS	75	0.256325	1.05015	0.328042	0.755669	0.671089	3442	tags=33%	list=19%	signal=27%	Pde2a/Gnb3/Atp2b2/Gng3/Gng13/Nos3/Pafah2/P2rx6/Atp2b1/Itpr2/Pde1a/Pla2g4a/P2rx1/Slc8a3/Atp2b4/Slc8a2/Atp2a3/Gnb5/Itpr3/Gnb1/Gngt1/Gng8/Atp2a2/Trpc6/Gnb4
REACTOME_AEROBIC_RESPIRATION_AND_RESPIRATORY_ELECTRON_TRANSPORT	REACTOME_AEROBIC_RESPIRATION_AND_RESPIRATORY_ELECTRON_TRANSPORT	203	0.219788	1.04931	0.309524	0.739418	0.656657	4133	tags=30%	list=23%	signal=23%	Me1/Pcx/Dlat/Aco2/Me3/Got1/Slc25a22/Rmnd5a/Ubc/Cycs/Coq10b/Idh3a/Sdhd/Cs/Slc25a12/Mdh2/Pdpr/Pyurf/Hagh/Cox11/Fh1/Pkm/Pdha1/L2hgdh/Pdhb/Ndufa10/Coa5/Ndufv1/Ndufc1/Sdha/Uqcrfs1/Ndufs1/Cox7b/Cyc1/Ndufc2/Ndufb8/Ndufa9/Sirt3/Ndufaf4/Uqcrc2/Ldhal6b/Ldha/Uqcr10/Cox18/Ndufaf5/Dmac2/Slc25a4/Higd1a/Mkln1/Timm21/Ndufa5/Vdac1/Idh3b/Adhfe1/Armc8/Ndufv2/Cox5a/Cox7a1/Cox5b/Dld/D2hgdh
REACTOME_RHOG_GTPASE_CYCLE	REACTOME_RHOG_GTPASE_CYCLE	70	0.255673	1.04101	0.371287	0.802727	0.71288	3806	tags=37%	list=21%	signal=29%	Dsg2/Cav1/Letm1/Dock5/Arhgef26/Epha2/Arhgef5/Iqgap2/Mcam/Arhgap21/Tfrc/Arhgap5/Mcf2l/Stbd1/Dock4/Arhgap35/Kalrn/Itsn1/Vav3/Elmo2/Itgb1/Pik3r1/Pak2/Vangl1/Cyfip1/Ndufa5
REACTOME_ACYL_CHAIN_REMODELLING_OF_PE	REACTOME_ACYL_CHAIN_REMODELLING_OF_PE	24	0.330988	1.03849	0.397163	0.842203	0.747938	2521	tags=25%	list=14%	signal=21%	Pla2g4c/Pla2r1/Pla2g3/Pla2g4a/Lpcat3/Pnpla8
REACTOME_DOWNREGULATION_OF_ERBB2_SIGNALING	REACTOME_DOWNREGULATION_OF_ERBB2_SIGNALING	26	0.321961	1.02549	0.394834	0.842203	0.747938	1766	tags=27%	list=10%	signal=24%	Nrg1/Matk/Btc/Egfr/Erbb4/Ereg/Ubc
REACTOME_SIALIC_ACID_METABOLISM	REACTOME_SIALIC_ACID_METABOLISM	31	0.307134	1.02388	0.40293	0.842673	0.748355	2923	tags=35%	list=16%	signal=30%	St6gal2/Gne/St8sia6/Neu2/Slc17a5/St3gal6/Neu3/St6galnac6/St6galnac5/St3gal1/St3gal5
REACTOME_HSF1_DEPENDENT_TRANSACTIVATION	REACTOME_HSF1_DEPENDENT_TRANSACTIVATION	23	0.326753	1.01156	0.429553	0.850318	0.755144	4155	tags=43%	list=23%	signal=33%	Hspa1b/Hspa1a/Rptor/Camk2d/Camk2b/Ep300/Hspa8/Hsp90aa1/Camk2g/Dnajb1
REACTOME_HS_GAG_DEGRADATION	REACTOME_HS_GAG_DEGRADATION	21	0.337469	1.0112	0.447552	0.860957	0.764592	1637	tags=19%	list=9%	signal=17%	Glb1l2/Hpse2/Gpc6/Gpc2
REACTOME_PREDNISONE_ADME	REACTOME_PREDNISONE_ADME	22	0.333163	1.01094	0.451049	0.860957	0.764592	2139	tags=27%	list=12%	signal=24%	Hsd11b1/Abcb1a/Cyp3a41b/Ugt2b35/Ugt1a2/Cyp3a44
REACTOME_SMOOTH_MUSCLE_CONTRACTION	REACTOME_SMOOTH_MUSCLE_CONTRACTION	33	0.295126	1.0043	0.423358	0.846247	0.751529	4416	tags=36%	list=25%	signal=27%	Vcl/Lmod1/Actg2/Myl6b/Sorbs1/Myh11/Pak2/Acta2/Pde5a/Myl9/Tpm2/Pxn
REACTOME_METAL_ION_SLC_TRANSPORTERS	REACTOME_METAL_ION_SLC_TRANSPORTERS	19	0.336233	1.00018	0.425806	0.846247	0.751529	2399	tags=21%	list=14%	signal=18%	Slc30a10/Slc39a2/Slc31a1/Slc39a4
REACTOME_RHOJ_GTPASE_CYCLE	REACTOME_RHOJ_GTPASE_CYCLE	16	0.349453	0.999842	0.438438	0.860957	0.764592	3868	tags=44%	list=22%	signal=34%	Rhoj/Arhgap21/Arhgap5/Arhgap35/Dock8/Pik3r1/Arhgap26
REACTOME_CELL_DEATH_SIGNALLING_VIA_NRAGE_NRIF_AND_NADE	REACTOME_CELL_DEATH_SIGNALLING_VIA_NRAGE_NRIF_AND_NADE	69	0.245497	0.997417	0.410891	0.846247	0.751529	3498	tags=35%	list=20%	signal=28%	Casp3/Tiam2/Arhgef10/Arhgef26/Arhgef37/Ubc/Arhgef5/Aph1b/Arhgef11/Fgd4/Mcf2l/Arhgef19/Bcl2l11/Net1/Arhgef7/Kalrn/Arhgef38/Plekhg2/Itsn1/Arhgef17/Vav3/Arhgef9/Ngef/Gna13
REACTOME_MAP2K_AND_MAPK_ACTIVATION	REACTOME_MAP2K_AND_MAPK_ACTIVATION	37	0.28063	0.996577	0.443636	0.860957	0.764592	540	tags=11%	list=3%	signal=11%	Fn1/Vwf/Vcl/Itga2b
REACTOME_FORMATION_OF_FIBRIN_CLOT_CLOTTING_CASCADE	REACTOME_FORMATION_OF_FIBRIN_CLOT_CLOTTING_CASCADE	35	0.286354	0.992156	0.461538	0.873425	0.775665	3022	tags=40%	list=17%	signal=33%	F10/Vwf/Pros1/Thbd/Prtn3/Kng2/F2r/F12/F3/Gp1ba/F13a1/Gp5/Serping1/F7
REACTOME_SIGNALING_BY_ACTIVIN	REACTOME_SIGNALING_BY_ACTIVIN	15	0.348762	0.99166	0.44898	0.860957	0.764592	3481	tags=47%	list=20%	signal=38%	Tgfbr3/Acvr2a/Acvr2b/Fst/Inhba/Inhbb/Smad3
REACTOME_BIOLOGICAL_OXIDATIONS	REACTOME_BIOLOGICAL_OXIDATIONS	193	0.208014	0.982891	0.546512	0.933775	0.82926	2833	tags=22%	list=16%	signal=18%	Cyp2e1/Acss1/Gsto2/Cyp11a1/Cyp26a1/Cyp2u1/Cyp2c29/Slc26a2/Cyp26b1/Fmo1/Chac1/Aoc3/Cyp7b1/Gclm/Ahrr/Gstk1/Cyp1a1/Cyp2a12/Cyp3a41b/Sult6b1/Ugt2a2/Smox/Cyp4f15/Ugt2b35/Acy3/Gstm3/Cyp4b1/Ugt1a2/Tpmt/Ptgs1/Cyp3a44/Dpep3/Ugdh/Ces1d/Cbr3/Comt/Aoc2/Oplah/Gclc/Cyp2d22/Ggt1/N6amt1
REACTOME_RAF_INDEPENDENT_MAPK1_3_ACTIVATION	REACTOME_RAF_INDEPENDENT_MAPK1_3_ACTIVATION	22	0.323777	0.982457	0.475524	0.881118	0.782497	2443	tags=23%	list=14%	signal=20%	Jak2/Dusp1/Dusp4/Dusp6/Dusp8
REACTOME_MISCELLANEOUS_TRANSPORT_AND_BINDING_EVENTS	REACTOME_MISCELLANEOUS_TRANSPORT_AND_BINDING_EVENTS	23	0.317143	0.98181	0.467354	0.87799	0.779719	3020	tags=22%	list=17%	signal=18%	Csn3/Lrrc8b/Nipal1/Lrrc8d/Azgp1
REACTOME_FCERI_MEDIATED_MAPK_ACTIVATION	REACTOME_FCERI_MEDIATED_MAPK_ACTIVATION	30	0.293273	0.980078	0.473684	0.881118	0.782497	228	tags=7%	list=1%	signal=7%	Ms4a2/Fcer1a
REACTOME_PROTEIN_PROTEIN_INTERACTIONS_AT_SYNAPSES	REACTOME_PROTEIN_PROTEIN_INTERACTIONS_AT_SYNAPSES	64	0.242255	0.979836	0.476636	0.881118	0.782497	2503	tags=25%	list=14%	signal=22%	Slitrk5/Grin2a/Lrfn1/Gria1/Dlg4/Lrrc4b/Epb41l3/Sorbs2/Ppfia2/Nrxn3/Shank3/Slitrk6/Gria4/Epb41/Dlg3/Gria3
REACTOME_PLATELET_CALCIUM_HOMEOSTASIS	REACTOME_PLATELET_CALCIUM_HOMEOSTASIS	27	0.302607	0.979762	0.47331	0.881118	0.782497	3402	tags=44%	list=19%	signal=36%	Atp2b2/P2rx6/Atp2b1/Itpr2/P2rx1/Slc8a3/Atp2b4/Slc8a2/Atp2a3/Itpr3/Atp2a2/Trpc6
REACTOME_ACTIVATION_OF_G_PROTEIN_GATED_POTASSIUM_CHANNELS	REACTOME_ACTIVATION_OF_G_PROTEIN_GATED_POTASSIUM_CHANNELS	29	0.2952	0.975499	0.484211	0.883493	0.784606	3442	tags=41%	list=19%	signal=33%	Kcnj16/Gnb3/Gng3/Gng13/Kcnj4/Kcnj2/Gnb5/Kcnj9/Gnb1/Gngt1/Gng8/Gnb4
REACTOME_PEPTIDE_HORMONE_METABOLISM	REACTOME_PEPTIDE_HORMONE_METABOLISM	54	0.254895	0.974963	0.493333	0.888278	0.788855	864	tags=13%	list=5%	signal=12%	Cpa3/Lep/Igf1/Gnb3/Gng13/Grp/Cma1
REACTOME_ABC_TRANSPORTERS_IN_LIPID_HOMEOSTASIS	REACTOME_ABC_TRANSPORTERS_IN_LIPID_HOMEOSTASIS	17	0.336655	0.973046	0.463722	0.875417	0.777434	3185	tags=35%	list=18%	signal=29%	Abcd2/Abca6/Abcg8/Abcg4/Abcg5/Abca7
REACTOME_RECEPTOR_TYPE_TYROSINE_PROTEIN_PHOSPHATASES	REACTOME_RECEPTOR_TYPE_TYROSINE_PROTEIN_PHOSPHATASES	19	0.32706	0.97289	0.451613	0.860957	0.764592	1782	tags=21%	list=10%	signal=19%	Slitrk5/Lrrc4b/Ppfia2/Slitrk6
REACTOME_APOPTOTIC_CLEAVAGE_OF_CELLULAR_PROTEINS	REACTOME_APOPTOTIC_CLEAVAGE_OF_CELLULAR_PROTEINS	36	0.272552	0.959502	0.508897	0.909536	0.807734	3435	tags=36%	list=19%	signal=29%	Casp3/Dsg2/Gsn/Bmx/Sorbs2/Tjp1/Dsp/Ctnnb1/Plec/Sptan1/Ocln/Apc/Rock1
REACTOME_CITRIC_ACID_CYCLE_TCA_CYCLE	REACTOME_CITRIC_ACID_CYCLE_TCA_CYCLE	33	0.281709	0.958645	0.510949	0.909536	0.807734	5039	tags=52%	list=28%	signal=37%	Aco2/Idh3a/Sdhd/Cs/Mdh2/Fh1/Sdha/Sirt3/Idh3b/Dld/Suclg1/Idh3g/Sdhb/Acat1/Isca1/Dlst/Sdhaf2
REACTOME_SIGNALING_BY_HIPPO	REACTOME_SIGNALING_BY_HIPPO	20	0.318957	0.953982	0.530612	0.924986	0.821455	1562	tags=15%	list=9%	signal=14%	Casp3/Tjp1/Mob1b
REACTOME_SIGNALING_BY_FGFR2	REACTOME_SIGNALING_BY_FGFR2	56	0.244485	0.946823	0.589286	0.952207	0.845629	157	tags=4%	list=1%	signal=4%	Fgfbp3/Fgf7
REACTOME_SIGNALING_BY_VEGF	REACTOME_SIGNALING_BY_VEGF	100	0.215468	0.941704	0.604651	0.964948	0.856945	4606	tags=43%	list=26%	signal=32%	Nos3/Flt4/Flt1/Shb/Cav1/Abi2/Pgf/Them4/Cdh5/Rock2/Nck2/Itgav/Shc2/Crk/Itgb3/Kdr/Vegfa/Ctnnb1/Bcar1/Pdpk1/Nckap1/Vav3/Trib3/Elmo2/Rock1/Pik3r1/Ctnna1/Pak2/Hspb1/Cyfip1/Hsp90aa1/Abi1/Rasa1/Kras/Jup/Src/Pxn/Ctnnd1/Mapkapk3/Dock1/Mapkap1/Nrp1/Wasf2
REACTOME_THROMBOXANE_SIGNALLING_THROUGH_TP_RECEPTOR	REACTOME_THROMBOXANE_SIGNALLING_THROUGH_TP_RECEPTOR	24	0.300043	0.9414	0.549645	0.9346	0.829993	3631	tags=42%	list=20%	signal=33%	Gnb3/Gng3/Gng13/Gnb5/Gnb1/Gngt1/Gng8/Gnb4/Gna13/Gnaq
REACTOME_DEADENYLATION_OF_MRNA	REACTOME_DEADENYLATION_OF_MRNA	23	0.303068	0.938236	0.542955	0.931812	0.827517	12358	tags=100%	list=70%	signal=30%	Tnks1bp1/Cnot11/Cnot1/Cnot2/Cnot7/Eif4a1/Cnot3/Pan3/Cnot6/Eif4e/Paip1/Cnot10/Eif4g1/Cnot6l/Pan2/Parn/Eif4b/Pabpc1/Eif4a2/Cnot4/Cnot8/Eif4a3/Cnot9
REACTOME_REGULATION_OF_FZD_BY_UBIQUITINATION	REACTOME_REGULATION_OF_FZD_BY_UBIQUITINATION	19	0.314853	0.936579	0.516129	0.909986	0.808134	3605	tags=42%	list=20%	signal=34%	Rspo2/Lrp5/Rspo4/Ubc/Rnf43/Fzd4/Fzd5/Usp8
REACTOME_EPH_EPHRIN_SIGNALING	REACTOME_EPH_EPHRIN_SIGNALING	64	0.231347	0.935716	0.64486	0.980518	0.870771	4145	tags=39%	list=23%	signal=30%	Mmp2/Epha1/Epha7/Epha2/Efnb1/Epha10/Aph1b/Mmp9/Rock2/Nck2/Epha8/Git1/Arhgef7/Kalrn/Itsn1/Vav3/Rock1/Ngef/Efnb2/Pak2/Sdc2/Rasa1/Src/Yes1/Epha4
REACTOME_PLASMA_LIPOPROTEIN_ASSEMBLY	REACTOME_PLASMA_LIPOPROTEIN_ASSEMBLY	17	0.323167	0.934062	0.533123	0.9253	0.821734	2037	tags=24%	list=11%	signal=21%	Abca1/Apoc1/Apoa2/Bmp1
REACTOME_OPIOID_SIGNALLING	REACTOME_OPIOID_SIGNALLING	71	0.229337	0.931305	0.597938	0.960906	0.853354	3442	tags=30%	list=19%	signal=24%	Plcb2/Gnb3/Gng3/Gng13/Plcb1/Adcy5/Pde1a/Adcy2/Gnai1/Ppp1r1b/Pde4d/Pla2g4a/Adcy8/Gnai3/Gnb5/Gnb1/Gngt1/Adcy9/Gng8/Adcy4/Gnb4
REACTOME_RHOF_GTPASE_CYCLE	REACTOME_RHOF_GTPASE_CYCLE	41	0.258801	0.930953	0.610895	0.968845	0.860405	3705	tags=29%	list=21%	signal=23%	Cav1/Sowahc/Fam169a/Mcam/Arhgap21/Baiap2l1/Arhgap5/Farp1/Arhgap12/Pik3r1/Vangl1/Actn1
REACTOME_FATTY_ACYL_COA_BIOSYNTHESIS	REACTOME_FATTY_ACYL_COA_BIOSYNTHESIS	28	0.283837	0.927051	0.562937	0.941065	0.835735	2292	tags=18%	list=13%	signal=16%	Acsl3/Elovl3/Elovl6/Acsl5/Fasn
REACTOME_SIGNALING_BY_FGFR1	REACTOME_SIGNALING_BY_FGFR1	45	0.250439	0.923731	0.598394	0.960906	0.853354	2331	tags=18%	list=13%	signal=15%	Flrt3/Flrt2/Tgfbr3/Spred2/Spry2/Ubc/Fgf10/Fgf18
REACTOME_G_BETA_GAMMA_SIGNALLING_THROUGH_CDC42	REACTOME_G_BETA_GAMMA_SIGNALLING_THROUGH_CDC42	20	0.308064	0.9214	0.568027	0.941441	0.836068	548	tags=15%	list=3%	signal=15%	Gnb3/Gng3/Gng13
REACTOME_UNBLOCKING_OF_NMDA_RECEPTORS_GLUTAMATE_BINDING_AND_ACTIVATION	REACTOME_UNBLOCKING_OF_NMDA_RECEPTORS_GLUTAMATE_BINDING_AND_ACTIVATION	22	0.303173	0.919938	0.576923	0.946897	0.840914	2503	tags=27%	list=14%	signal=23%	Grin2a/Gria1/Dlg4/Gria4/Dlg3/Gria3
REACTOME_G_PROTEIN_MEDIATED_EVENTS	REACTOME_G_PROTEIN_MEDIATED_EVENTS	39	0.256608	0.914741	0.637405	0.980518	0.870771	2097	tags=21%	list=12%	signal=18%	Plcb2/Plcb1/Adcy5/Pde1a/Adcy2/Gnai1/Pla2g4a/Adcy8
REACTOME_N_GLYCAN_ANTENNAE_ELONGATION	REACTOME_N_GLYCAN_ANTENNAE_ELONGATION	15	0.321164	0.913189	0.603499	0.964948	0.856945	2546	tags=27%	list=14%	signal=23%	B4galt6/St8sia6/B4galt5/Mgat5
REACTOME_HSP90_CHAPERONE_CYCLE_FOR_STEROID_HORMONE_RECEPTORS_SHR_IN_THE_PRESENCE_OF_LIGAND	REACTOME_HSP90_CHAPERONE_CYCLE_FOR_STEROID_HORMONE_RECEPTORS_SHR_IN_THE_PRESENCE_OF_LIGAND	51	0.242067	0.910547	0.636364	0.980518	0.870771	4811	tags=39%	list=27%	signal=29%	Hspa1b/Hspa1a/Tuba3b/Tubb6/Nr3c2/Tubb2a/Dync1i1/Dync1h1/Dync1i2/Dync1li1/Actr1a/Hspa8/Hsp90aa1/Dnaja1/Dnajb1/Dctn1/Capza2/Tubal3/Nr3c1/Fkbp5
REACTOME_CLASS_I_PEROXISOMAL_MEMBRANE_PROTEIN_IMPORT	REACTOME_CLASS_I_PEROXISOMAL_MEMBRANE_PROTEIN_IMPORT	19	0.303379	0.902447	0.577419	0.946897	0.840914	77	tags=5%	list=0%	signal=5%	Abcd2
REACTOME_METABOLISM_OF_FAT_SOLUBLE_VITAMINS	REACTOME_METABOLISM_OF_FAT_SOLUBLE_VITAMINS	40	0.252213	0.901581	0.667954	0.992315	0.881248	2024	tags=20%	list=11%	signal=18%	Lpl/Gpihbp1/Gpc6/Lrp2/Clps/Gpc2/Akr1b10/Apoa2
REACTOME_COMPLEMENT_CASCADE	REACTOME_COMPLEMENT_CASCADE	44	0.248294	0.901191	0.679012	0.994159	0.882885	2975	tags=32%	list=17%	signal=27%	Cd55/Cfd/Colec11/C5ar1/C7/Gzmm/C6/Cfh/C5ar2/C8g/C3ar1/Vtn/Serping1/Fcna
REACTOME_SUMOYLATION_OF_INTRACELLULAR_RECEPTORS	REACTOME_SUMOYLATION_OF_INTRACELLULAR_RECEPTORS	27	0.27803	0.900188	0.6121	0.968845	0.860405	3778	tags=33%	list=21%	signal=26%	Ppara/Vdr/Nr3c2/Esr1/Thrb/Rara/Nr1h4/Nr5a2/Nr1i2
REACTOME_A_TETRASACCHARIDE_LINKER_SEQUENCE_IS_REQUIRED_FOR_GAG_SYNTHESIS	REACTOME_A_TETRASACCHARIDE_LINKER_SEQUENCE_IS_REQUIRED_FOR_GAG_SYNTHESIS	22	0.296035	0.898279	0.618881	0.968908	0.860461	1637	tags=18%	list=9%	signal=17%	Cspg4/Bcan/Gpc6/Gpc2
REACTOME_SYNTHESIS_OF_IP3_AND_IP4_IN_THE_CYTOSOL	REACTOME_SYNTHESIS_OF_IP3_AND_IP4_IN_THE_CYTOSOL	27	0.277159	0.89737	0.6121	0.968845	0.860405	1659	tags=15%	list=9%	signal=13%	Plcb2/Plcb1/Inppl1/Plcd4
REACTOME_PI_METABOLISM	REACTOME_PI_METABOLISM	76	0.218583	0.897172	0.68984	0.995476	0.884055	2786	tags=21%	list=16%	signal=18%	Pik3r5/Bmx/Pik3cg/Pik3c2g/Plekha3/Plekha1/Plekha5/Inppl1/Plekha8/Pip5k1b/Pik3r3/Mtmr6/Pik3c3/Pik3r6/Plekha4/Plekha6
REACTOME_TP53_REGULATES_TRANSCRIPTION_OF_ADDITIONAL_CELL_CYCLE_GENES_WHOSE_EXACT_ROLE_IN_THE_P53_PATHWAY_REMAIN_UNCERTAIN	REACTOME_TP53_REGULATES_TRANSCRIPTION_OF_ADDITIONAL_CELL_CYCLE_GENES_WHOSE_EXACT_ROLE_IN_THE_P53_PATHWAY_REMAIN_UNCERTAIN	18	0.302982	0.892227	0.623794	0.968908	0.860461	12358	tags=100%	list=70%	signal=30%	Tnks1bp1/Plk2/Plk3/Cnot11/Cnot1/Cnot2/Cnot7/Btg2/Cnot3/Cnot6/Cnot10/Cenpj/Cnot6l/Cdc25c/Cnot4/Cnot8/Npm1/Cnot9
REACTOME_CELL_JUNCTION_ORGANIZATION	REACTOME_CELL_JUNCTION_ORGANIZATION	71	0.219132	0.889864	0.685567	0.995476	0.884055	3983	tags=37%	list=22%	signal=29%	Cdh10/Itga6/Flnc/Dst/Krt5/Fblim1/Hoxc8/Flna/Parvb/Cdh5/Itgb4/Afdn/Pard3/Ctnnb1/Fermt2/Plec/Cdh17/Itgb1/Pard6b/Adam33/Ctnna1/Actn1/Tesk1/Rsu1/Lims2/Jup
REACTOME_GLYCOSAMINOGLYCAN_METABOLISM	REACTOME_GLYCOSAMINOGLYCAN_METABOLISM	117	0.197449	0.881186	0.821918	1	0.888073	1637	tags=15%	list=9%	signal=13%	Glb1l2/Cspg4/Chst9/Bcan/B4galt6/Slc26a2/Lyve1/Hpse2/Omd/Hs3st1/Gpc6/St3gal6/Hs6st3/Dse/Prelp/B4galt5/Gpc2
REACTOME_INTRACELLULAR_SIGNALING_BY_SECOND_MESSENGERS	REACTOME_INTRACELLULAR_SIGNALING_BY_SECOND_MESSENGERS	241	0.181237	0.874516	0.884058	1	0.888073	2331	tags=16%	list=13%	signal=14%	Ntf5/Fgf7/Ntrk2/Il1rl1/Nrg1/Kitl/Fgf15/Btc/Irs2/Foxo6/Epgn/Adcy5/Egfr/Chd3/Foxo3/Pde1a/Adcy2/Erbb4/Rptor/Pdgfrb/Ereg/Otud3/Ubc/Phlpp2/Frk/Irak4/Pdgfra/Prex2/Esr1/Mdm2/Met/Adcy8/Them4/Pip5k1b/Fgf10/Pik3r3/Sall4/Fgf18
REACTOME_PENTOSE_PHOSPHATE_PATHWAY	REACTOME_PENTOSE_PHOSPHATE_PATHWAY	15	0.306264	0.870821	0.638484	0.980518	0.870771	1858	tags=20%	list=10%	signal=18%	G6pdx/Pgm2/Pgd
REACTOME_INSULIN_RECEPTOR_RECYCLING	REACTOME_INSULIN_RECEPTOR_RECYCLING	26	0.271304	0.864136	0.697417	0.995942	0.884469	863	tags=8%	list=5%	signal=7%	Ide/Atp6v0a4
REACTOME_RHO_GTPASES_ACTIVATE_PAKS	REACTOME_RHO_GTPASES_ACTIVATE_PAKS	22	0.284358	0.862846	0.695804	0.995476	0.884055	4526	tags=41%	list=26%	signal=30%	Ppp1r12b/Myh14/Flna/Ppp1r12a/Myh11/Pak2/Myl9/Nf2/Myh9
REACTOME_RHOU_GTPASE_CYCLE	REACTOME_RHOU_GTPASE_CYCLE	39	0.241808	0.861983	0.740458	1	0.888073	3872	tags=44%	list=22%	signal=34%	Arhgap31/Dst/Epha2/Nck2/Hgs/Git1/Rhou/Arhgef7/Stam2/Sptan1/Stam/Iqgap1/Sptbn1/Pik3r1/Pak2/Vangl1/Dlg5
REACTOME_INSERTION_OF_TAIL_ANCHORED_PROTEINS_INTO_THE_ENDOPLASMIC_RETICULUM_MEMBRANE	REACTOME_INSERTION_OF_TAIL_ANCHORED_PROTEINS_INTO_THE_ENDOPLASMIC_RETICULUM_MEMBRANE	15	0.3031	0.861827	0.661808	0.992315	0.881248	12355	tags=100%	list=70%	signal=30%	Stx1a/App/Hmox1/Aldh3a2/Sgta/Vapa/Prnp/Stx5a/Ube2j2/Emd/Cyb5a/Serp1/Vamp2/Sec61g/Sec61b
REACTOME_NA_CL_DEPENDENT_NEUROTRANSMITTER_TRANSPORTERS	REACTOME_NA_CL_DEPENDENT_NEUROTRANSMITTER_TRANSPORTERS	17	0.296284	0.856361	0.684543	0.995476	0.884055	3088	tags=35%	list=17%	signal=29%	Slc6a12/Slc6a5/Slc6a1/Slc6a6/Slc6a19/Slc6a14
REACTOME_SIGNALING_BY_NTRKS	REACTOME_SIGNALING_BY_NTRKS	75	0.208897	0.85584	0.804233	1	0.888073	2612	tags=13%	list=15%	signal=11%	Ntf5/Ntrk2/Pcsk6/Irs2/Dusp4/Dusp6/Ralgds/Shc2/Kidins220/Crk
REACTOME_ACYL_CHAIN_REMODELLING_OF_PC	REACTOME_ACYL_CHAIN_REMODELLING_OF_PC	24	0.27223	0.854136	0.702128	1	0.888073	2521	tags=25%	list=14%	signal=21%	Pla2g4c/Pla2r1/Pla2g3/Pla2g4a/Lpcat3/Pnpla8
REACTOME_SIGNALING_BY_TGF_BETA_RECEPTOR_COMPLEX	REACTOME_SIGNALING_BY_TGF_BETA_RECEPTOR_COMPLEX	73	0.209339	0.853958	0.826316	1	0.888073	3545	tags=25%	list=20%	signal=20%	Fbn1/Itga8/Tgfb3/Tgfbr3/Ltbp4/Ltbp1/Ubc/Cgn/Pmepa1/Smad7/Itgb6/Itgav/Itgb3/Pard3/Ccnt2/Itgb1/Smad3/Cdk8
REACTOME_METABOLISM_OF_COFACTORS	REACTOME_METABOLISM_OF_COFACTORS	25	0.270256	0.853515	0.706093	1	0.888073	1598	tags=12%	list=9%	signal=11%	Gch1/Nos3/Hpdl
REACTOME_RHOA_GTPASE_CYCLE	REACTOME_RHOA_GTPASE_CYCLE	139	0.188559	0.85246	0.909091	1	0.888073	3868	tags=32%	list=22%	signal=26%	Actc1/Stard8/Arhgap31/Pcdh7/Cav1/Daam1/Sowahc/Rhpn2/Arhgap18/Stk10/Arhgef10/Pkn2/Arhgef5/Prex2/Mcam/Arhgap21/Rock2/Tfrc/Dlc1/Slk/Arhgap5/Arhgef11/Arhgap23/Mcf2l/Stbd1/Arhgef19/Net1/Farp1/Arhgap35/Cavin1/Arhgef7/Kalrn/Arhgef17/Anln/Iqgap1/Bcr/Vav3/Flot1/Rock1/Ngef/Pik3r1/Vangl1/Abcd3/Arhgef3/Arhgap26
REACTOME_ENDOGENOUS_STEROLS	REACTOME_ENDOGENOUS_STEROLS	21	0.284194	0.851563	0.695804	0.995476	0.884055	1184	tags=14%	list=7%	signal=13%	Cyp11a1/Cyp7b1/Ahrr
REACTOME_APOPTOTIC_EXECUTION_PHASE	REACTOME_APOPTOTIC_EXECUTION_PHASE	48	0.226714	0.848163	0.783898	1	0.888073	3435	tags=31%	list=19%	signal=25%	Casp3/Dsg2/Gsn/Bmx/Sorbs2/Tjp1/H1f5/Dsp/Ctnnb1/Dnm1l/Plec/Sptan1/Ocln/Apc/Rock1
REACTOME_RND1_GTPASE_CYCLE	REACTOME_RND1_GTPASE_CYCLE	42	0.234316	0.846509	0.75969	1	0.888073	3872	tags=36%	list=22%	signal=28%	Fam83b/Cav1/Dst/Plxna1/Fam135a/Epha2/Tfrc/Dsp/Kidins220/Arhgap5/Arhgap35/Aldh3a2/Pik3r1/Vangl1/Dlg5
REACTOME_SIGNALING_BY_INSULIN_RECEPTOR	REACTOME_SIGNALING_BY_INSULIN_RECEPTOR	65	0.209253	0.84613	0.807512	1	0.888073	1173	tags=9%	list=7%	signal=9%	Ide/Fgf7/Fgf15/Irs2/Atp6v0a4/Grb10
REACTOME_RND3_GTPASE_CYCLE	REACTOME_RND3_GTPASE_CYCLE	41	0.234923	0.845061	0.750973	1	0.888073	3897	tags=41%	list=22%	signal=32%	Fam83b/Cav1/Dst/Epha2/Arhgap21/Rnd3/Dsp/Arhgap5/Picalm/Arhgap35/Tmod3/Ckb/Rock1/Pik3r1/Vangl1/Dlg5/Tnfaip1
REACTOME_GLYCOSPHINGOLIPID_CATABOLISM	REACTOME_GLYCOSPHINGOLIPID_CATABOLISM	31	0.251023	0.836824	0.739927	1	0.888073	2179	tags=19%	list=12%	signal=17%	Arsj/Glb1l2/Neu2/Neu3/Sts/Smpd3
REACTOME_RND2_GTPASE_CYCLE	REACTOME_RND2_GTPASE_CYCLE	42	0.227307	0.821186	0.79845	1	0.888073	3897	tags=33%	list=22%	signal=26%	Fam83b/Prag1/Cav1/Dst/Epha2/Tfrc/Kidins220/Arhgap5/Arhgap35/Aldh3a2/Pik3r1/Vangl1/Dlg5/Tnfaip1
REACTOME_VXPX_CARGO_TARGETING_TO_CILIUM	REACTOME_VXPX_CARGO_TARGETING_TO_CILIUM	19	0.269487	0.80163	0.777419	1	0.888073	4072	tags=32%	list=23%	signal=24%	Asap1/Pkd2/Exoc4/Exoc5/Cngb1/Cnga4
REACTOME_CYTOPROTECTION_BY_HMOX1	REACTOME_CYTOPROTECTION_BY_HMOX1	44	0.219733	0.797529	0.82716	1	0.888073	4234	tags=30%	list=24%	signal=23%	Ppara/Hbb-bt/Hbb-bs/Cycs/Hba-a1/Hmox1/Cox7b/Ncor2/Tbl1xr1/Cox5a/Cox7a1/Cox5b/Hmox2
REACTOME_MISCELLANEOUS_SUBSTRATES	REACTOME_MISCELLANEOUS_SUBSTRATES	24	0.251115	0.787885	0.808511	1	0.888073	2806	tags=25%	list=16%	signal=21%	Cyp2u1/Cyp3a41b/Cyp4f15/Cyp4b1/Cyp3a44/Cyp2d22
REACTOME_SIGNALING_BY_TGFB_FAMILY_MEMBERS	REACTOME_SIGNALING_BY_TGFB_FAMILY_MEMBERS	112	0.179771	0.787876	0.966667	1	0.888073	3590	tags=28%	list=20%	signal=22%	Fbn1/Itga8/Tgfb3/Tgfbr3/Ltbp4/Ltbp1/Ubc/Aph1b/Acvr2a/Cgn/Pmepa1/Smad7/Zfyve16/Itgb6/Bmpr1a/Acvrl1/Itgav/Acvr2b/Fst/Itgb3/Bmp2/Pard3/Inhba/Fstl1/Ccnt2/Grem2/Inhbb/Itgb1/Smad3/Cdk8/Timp2
REACTOME_AFLATOXIN_ACTIVATION_AND_DETOXIFICATION	REACTOME_AFLATOXIN_ACTIVATION_AND_DETOXIFICATION	22	0.259349	0.78696	0.807692	1	0.888073	3193	tags=27%	list=18%	signal=22%	Cyp3a41b/Acy3/Cyp3a44/Dpep3/Ggt1/Dpep1
REACTOME_REGULATION_OF_LIPID_METABOLISM_BY_PPARALPHA	REACTOME_REGULATION_OF_LIPID_METABOLISM_BY_PPARALPHA	17	0.271336	0.784253	0.776025	1	0.888073	12918	tags=100%	list=73%	signal=27%	Ppara/Ncor2/Tbl1xr1/Chd9/Ncoa2/Tgs1/Tbl1x/Ncoa1/Rxra/Med1/Carm1/Sin3a/Fabp1/Sin3b/Hdac3/Smarcd3/Helz2
REACTOME_VITAMIN_B5_PANTOTHENATE_METABOLISM	REACTOME_VITAMIN_B5_PANTOTHENATE_METABOLISM	15	0.27571	0.783947	0.784257	1	0.888073	12840	tags=100%	list=72%	signal=28%	Slc5a6/Fasn/Pank2/Pdzd11/Pank1/Slc25a42/Pank3/Pank4/Slc25a16/Dcakd/Ppcs/Aasdhppt/Ppcdc/Vnn1/Coasy
REACTOME_DOWNSTREAM_SIGNALING_OF_ACTIVATED_FGFR1	REACTOME_DOWNSTREAM_SIGNALING_OF_ACTIVATED_FGFR1	25	0.246952	0.779916	0.827957	1	0.888073	468	tags=8%	list=3%	signal=8%	Flrt3/Flrt2
REACTOME_NEGATIVE_REGULATION_OF_MET_ACTIVITY	REACTOME_NEGATIVE_REGULATION_OF_MET_ACTIVITY	21	0.259938	0.778881	0.825175	1	0.888073	3605	tags=38%	list=20%	signal=30%	Ubc/Met/Sh3gl3/Hgs/Hgf/Stam2/Stam/Usp8
REACTOME_GLUTATHIONE_CONJUGATION	REACTOME_GLUTATHIONE_CONJUGATION	36	0.21769	0.766362	0.893238	1	0.888073	2809	tags=22%	list=16%	signal=19%	Gsto2/Chac1/Gclm/Gstk1/Gstm3/Oplah/Gclc/Ggt1
REACTOME_SULFUR_AMINO_ACID_METABOLISM	REACTOME_SULFUR_AMINO_ACID_METABOLISM	22	0.252103	0.764974	0.825175	1	0.888073	2828	tags=27%	list=16%	signal=23%	Fmo1/Suox/Cdo1/Bhmt2/Ethe1/Cth
REACTOME_CHAPERONIN_MEDIATED_PROTEIN_FOLDING	REACTOME_CHAPERONIN_MEDIATED_PROTEIN_FOLDING	39	0.214378	0.7642	0.877863	1	0.888073	548	tags=8%	list=3%	signal=7%	Gnb3/Gng3/Gng13
REACTOME_RHOD_GTPASE_CYCLE	REACTOME_RHOD_GTPASE_CYCLE	51	0.201381	0.757506	0.939394	1	0.888073	3868	tags=31%	list=22%	signal=25%	Cav1/Plxna1/Mcam/Mospd2/Arhgap21/Arhgap5/Stbd1/Arhgap35/Rhod/Arhgap12/Ankfy1/Pik3r1/Vangl1/Actn1/Cpne8/Arhgap26
REACTOME_METABOLISM_OF_VITAMINS_AND_COFACTORS	REACTOME_METABOLISM_OF_VITAMINS_AND_COFACTORS	177	0.158945	0.750585	1	1	0.888073	2292	tags=14%	list=13%	signal=12%	Gsto2/Pcx/Ptgs2/Lpl/Aox1/Gch1/Nos3/Nadk/Gpihbp1/Gpc6/Lrp2/Folr2/Hpdl/Clps/Gpc2/Akr1b10/Slc23a2/Nt5e/Mmachc/Slc2a1/Apoa2/Slc5a6/Nadsyn1/Fasn
REACTOME_NEGATIVE_REGULATION_OF_FGFR2_SIGNALING	REACTOME_NEGATIVE_REGULATION_OF_FGFR2_SIGNALING	28	0.228686	0.74692	0.884615	1	0.888073	2331	tags=18%	list=13%	signal=16%	Fgf7/Spry2/Ubc/Fgf10/Fgf18
REACTOME_SIGNALING_BY_WNT	REACTOME_SIGNALING_BY_WNT	233	0.154443	0.739308	1	1	0.888073	1170	tags=7%	list=7%	signal=7%	Wnt16/Plcb2/Gnb3/Kremen2/Gng3/Gng13/Wnt10b/Pde6b/Rspo2/Wnt2b/Wnt9b/Lrp5/Plcb1/Tcf7l1/Cav1/Daam1/Tle1
REACTOME_MITOCHONDRIAL_PROTEIN_DEGRADATION	REACTOME_MITOCHONDRIAL_PROTEIN_DEGRADATION	71	0.18134	0.736395	0.969072	1	0.888073	3467	tags=23%	list=20%	signal=18%	Oxct1/Aco2/Idh3a/Cs/Mdh2/Alas1/App/Fh1/Pdha1/Pdhb/Slc25a5/Bdh1/Ndufv1/Ndufs1/Acot3/Uqcrc2
REACTOME_DOWNSTREAM_SIGNAL_TRANSDUCTION	REACTOME_DOWNSTREAM_SIGNAL_TRANSDUCTION	27	0.225112	0.728854	0.896797	1	0.888073	4316	tags=41%	list=24%	signal=31%	Pdgfrb/Pdgfra/Nck2/Crk/Bcar1/Pik3r1/Rasa1/Stat6/Kras/Src/Crkl
REACTOME_COMPLEX_I_BIOGENESIS	REACTOME_COMPLEX_I_BIOGENESIS	57	0.186923	0.728247	0.981395	1	0.888073	14420	tags=100%	list=81%	signal=19%	Pyurf/Ndufa10/Ndufv1/Ndufc1/Ndufs1/Ndufc2/Ndufb8/Ndufa9/Ndufaf4/Ndufaf5/Dmac2/Ndufa5/Ndufv2/Ndufb10/Ndufs5/Ndufs3/Ndufs7/Hscb/Ndufs4/Ndufa12/Ndufa8/Hspa9/Ecsit/Ndufb6/Ndufb9/Ndufb4/Tmem126b/Ndufs2/Ndufs8/Ndufb5/Ndufa11/Ndufa1/Ndufb1/Tmem186/Ndufa7/Ndufb3/Ndufaf7/Timmdc1/Ndufv3/Ndufaf2/Ndufab1/Ndufa3/Ndufb7/Ndufa13/Ndufb2/Ndufaf1/Ndufb11/Ndufaf8/Ndufa6/Ndufs6/Nubpl/Ndufaf6/Ndufa2/Ndufaf3/Dmac1/Lyr…
REACTOME_PI_3K_CASCADE_FGFR2	REACTOME_PI_3K_CASCADE_FGFR2	17	0.248817	0.719166	0.861199	1	0.888073	3579	tags=29%	list=20%	signal=23%	Fgf7/Fgf10/Fgf18/Fgf9/Pik3r1
REACTOME_DISASSEMBLY_OF_THE_DESTRUCTION_COMPLEX_AND_RECRUITMENT_OF_AXIN_TO_THE_MEMBRANE	REACTOME_DISASSEMBLY_OF_THE_DESTRUCTION_COMPLEX_AND_RECRUITMENT_OF_AXIN_TO_THE_MEMBRANE	29	0.216717	0.716149	0.901754	1	0.888073	3551	tags=24%	list=20%	signal=19%	Lrp5/Cav1/Gsk3b/Ctnnb1/Apc/Dvl3/Fzd5
REACTOME_EPHA_MEDIATED_GROWTH_CONE_COLLAPSE	REACTOME_EPHA_MEDIATED_GROWTH_CONE_COLLAPSE	18	0.242519	0.714173	0.864952	1	0.888073	4329	tags=56%	list=24%	signal=42%	Epha1/Epha7/Epha2/Epha10/Epha8/Ngef/Src/Yes1/Epha4/Efna1
REACTOME_SHC_MEDIATED_CASCADE_FGFR2	REACTOME_SHC_MEDIATED_CASCADE_FGFR2	16	0.248638	0.711392	0.867868	1	0.888073	3133	tags=25%	list=18%	signal=21%	Fgf7/Fgf10/Fgf18/Fgf9
REACTOME_COPI_INDEPENDENT_GOLGI_TO_ER_RETROGRADE_TRAFFIC	REACTOME_COPI_INDEPENDENT_GOLGI_TO_ER_RETROGRADE_TRAFFIC	47	0.185811	0.690528	0.970954	1	0.888073	4620	tags=34%	list=26%	signal=25%	Bicd1/Tuba3b/Tubb6/Pla2g4a/Tubb2a/Dync1i1/Rab6a/Dync1h1/Dync1i2/Dync1li1/Actr1a/Pafah1b1/Dctn1/Capza2/Pafah1b2/Tubal3
REACTOME_FRS_MEDIATED_FGFR2_SIGNALING	REACTOME_FRS_MEDIATED_FGFR2_SIGNALING	18	0.231696	0.682303	0.900322	1	0.888073	3133	tags=22%	list=18%	signal=18%	Fgf7/Fgf10/Fgf18/Fgf9
REACTOME_NICOTINAMIDE_SALVAGING	REACTOME_NICOTINAMIDE_SALVAGING	18	0.222449	0.655071	0.92283	1	0.888073	328	tags=6%	list=2%	signal=5%	Ptgs2
REACTOME_TP53_REGULATES_TRANSCRIPTION_OF_CELL_CYCLE_GENES	REACTOME_TP53_REGULATES_TRANSCRIPTION_OF_CELL_CYCLE_GENES	34	0.187924	0.648902	0.963235	1	0.888073	14398	tags=100%	list=81%	signal=19%	Tnks1bp1/Gadd45a/Sfn/Plk2/Plk3/Cnot11/Cnot1/Cnot2/Cnot7/Cdkn1a/Ccne2/Cdkn1b/Btg2/Cnot3/Ccnb1/Cnot6/Cnot10/Cenpj/Ccna2/Cnot6l/E2f8/Cdk1/Pcna/Cdc25c/Cnot4/E2f7/Cnot8/Aurka/Npm1/Cnot9/Cdk2/Ccna1/Bax/Ccne1
REACTOME_DOWNSTREAM_SIGNALING_OF_ACTIVATED_FGFR2	REACTOME_DOWNSTREAM_SIGNALING_OF_ACTIVATED_FGFR2	23	0.208651	0.645942	0.958763	1	0.888073	4313	tags=30%	list=24%	signal=23%	Fgf7/Fgf10/Fgf18/Fgf9/Pik3r1/Kras/Frs2
REACTOME_PKA_MEDIATED_PHOSPHORYLATION_OF_CREB	REACTOME_PKA_MEDIATED_PHOSPHORYLATION_OF_CREB	16	0.221079	0.632541	0.936937	1	0.888073	3424	tags=31%	list=19%	signal=25%	Adcy5/Adcy2/Adcy8/Adcy9/Adcy4
REACTOME_ISG15_ANTIVIRAL_MECHANISM	REACTOME_ISG15_ANTIVIRAL_MECHANISM	26	0.195275	0.621976	0.98524	1	0.888073	808	tags=8%	list=5%	signal=7%	Flnb/Usp18
REACTOME_GLUCOSE_METABOLISM	REACTOME_GLUCOSE_METABOLISM	68	0.152321	0.619876	1	1	0.888073	3654	tags=24%	list=21%	signal=19%	Pcx/Hkdc1/Aldoa/Gckr/Pgam1/Pfkfb2/Gapdh/Gpi1/Pkm/Pgk1/Tpi1/Hk3/Nup88/Pck1/Aldoc/Slc37a1
REACTOME_REGULATION_OF_TP53_ACTIVITY_THROUGH_METHYLATION	REACTOME_REGULATION_OF_TP53_ACTIVITY_THROUGH_METHYLATION	18	0.205066	0.603882	0.96463	1	0.888073	2034	tags=17%	list=11%	signal=15%	L3mbtl1/Ubc/Mdm2
REACTOME_LDL_CLEARANCE	REACTOME_LDL_CLEARANCE	19	0.200753	0.597171	0.967742	1	0.888073	12283	tags=95%	list=69%	signal=29%	Npc1/Lipa/Pcsk9/Ap2a1/Ap2b1/Cltc/Apob/Soat2/Ces3b/Ap2m1/Ldlr/Clta/Ap2a2/Ces3a/Ldlrap1/Npc2/Soat1/Ap2s1
REACTOME_RHOBTB2_GTPASE_CYCLE	REACTOME_RHOBTB2_GTPASE_CYCLE	22	0.196271	0.595559	0.965035	1	0.888073	14248	tags=100%	list=80%	signal=20%	Tmod3/Actn1/Hsp90aa1/Cul3/Twf1/Actg1/Cct2/Cct7/Stk38/Hsp90ab1/Txnl1/Srrm1/Rbmx/Tra2b/Cdc37/Myo6/Hnrnpc/Cct6a/Ddx39b/Rhobtb2/Phip/Msi2
REACTOME_ABC_FAMILY_PROTEINS_MEDIATED_TRANSPORT	REACTOME_ABC_FAMILY_PROTEINS_MEDIATED_TRANSPORT	97	0.137793	0.593088	1	1	0.888073	922	tags=5%	list=5%	signal=5%	Abcd2/Abca4/Abcc2/Abca6/Abcb1a
REACTOME_CELLULAR_RESPONSE_TO_CHEMICAL_STRESS	REACTOME_CELLULAR_RESPONSE_TO_CHEMICAL_STRESS	152	0.126824	0.591963	1	1	0.888073	1795	tags=9%	list=10%	signal=8%	Gpx2/Ppara/Gpx7/Prkaa2/Hbb-bt/Bach1/Ero1a/Prdx1/Hbb-bs/Gsr/Sesn1/Ubc/Cycs
REACTOME_BRANCHED_CHAIN_AMINO_ACID_CATABOLISM	REACTOME_BRANCHED_CHAIN_AMINO_ACID_CATABOLISM	20	0.187888	0.561963	0.982993	1	0.888073	14396	tags=100%	list=81%	signal=19%	Bckdhb/Hibch/Auh/Dld/Mccc1/Echs1/Acat1/Hibadh/Bckdha/Bcat2/Acadsb/Acad8/Aldh6a1/Dbt/Hsd17b10/Mccc2/Ivd/Ppm1k/Bcat1/Bckdk
REACTOME_MITOPHAGY	REACTOME_MITOPHAGY	39	0.15497	0.552428	0.996183	1	0.888073	13536	tags=97%	list=76%	signal=23%	Ubc/Prkn/Tomm40/Mfn1/Mfn2/Vdac1/Atg12/Src/Ube2d3/Vdac2/Vdac3/Tbk1/Mterf3/Map1lc3a/Ulk1/Atg9a/Sqstm1/Csnk2a2/Csnk2a1/Optn/Ube2l3/Ube2v1/Ubb/Pgam5/Ube2n/Tomm70a/Map1lc3b/Ube2d2a/Csnk2b/Tomm6/Uba52/Pink1/Atg5/Tomm22/Fundc1/Tomm20/Tomm5/Tomm7
REACTOME_RESPIRATORY_ELECTRON_TRANSPORT	REACTOME_RESPIRATORY_ELECTRON_TRANSPORT	123	0.117738	0.527099	1	1	0.888073	4028	tags=26%	list=23%	signal=20%	Got1/Slc25a22/Cycs/Coq10b/Slc25a12/Mdh2/Pyurf/Cox11/Ndufa10/Coa5/Ndufv1/Ndufc1/Uqcrfs1/Ndufs1/Cox7b/Cyc1/Ndufc2/Ndufb8/Ndufa9/Ndufaf4/Uqcrc2/Uqcr10/Cox18/Ndufaf5/Dmac2/Higd1a/Timm21/Ndufa5/Ndufv2/Cox5a/Cox7a1/Cox5b
REACTOME_SPRY_REGULATION_OF_FGF_SIGNALING	REACTOME_SPRY_REGULATION_OF_FGF_SIGNALING	16	0.180734	0.51711	0.987988	1	0.888073	1766	tags=12%	list=10%	signal=11%	Spry2/Ubc
REACTOME_VLDLR_INTERNALISATION_AND_DEGRADATION	REACTOME_VLDLR_INTERNALISATION_AND_DEGRADATION	16	0.179566	0.513767	0.987988	1	0.888073	3489	tags=31%	list=20%	signal=25%	Ubc/Pcsk9/Vldlr/Mylip/Ap2a1
REACTOME_SIGNALLING_TO_ERKS	REACTOME_SIGNALLING_TO_ERKS	26	0.159632	0.508447	0.99262	1	0.888073	5063	tags=42%	list=29%	signal=30%	Ralgds/Shc2/Kidins220/Crk/Kras/Frs2/Crkl/Mapkapk3/Shc1/Rap1a/Map2k1
REACTOME_PINK1_PRKN_MEDIATED_MITOPHAGY	REACTOME_PINK1_PRKN_MEDIATED_MITOPHAGY	32	0.143321	0.477906	1	1	0.888073	13536	tags=97%	list=76%	signal=23%	Ubc/Prkn/Tomm40/Mfn1/Mfn2/Vdac1/Atg12/Ube2d3/Vdac2/Vdac3/Tbk1/Mterf3/Map1lc3a/Atg9a/Sqstm1/Optn/Ube2l3/Ube2v1/Ubb/Ube2n/Tomm70a/Map1lc3b/Ube2d2a/Tomm6/Uba52/Pink1/Atg5/Tomm22/Tomm20/Tomm5/Tomm7
REACTOME_BETA_CATENIN_PHOSPHORYLATION_CASCADE	REACTOME_BETA_CATENIN_PHOSPHORYLATION_CASCADE	17	0.163896	0.473715	1	1	0.888073	4740	tags=35%	list=27%	signal=26%	Gsk3b/Ctnnb1/Apc/Ppp2r5e/Ppp2ca/Frat1
REACTOME_NUCLEOTIDE_CATABOLISM	REACTOME_NUCLEOTIDE_CATABOLISM	34	0.132581	0.457802	1	1	0.888073	2431	tags=15%	list=14%	signal=13%	Entpd7/Nt5e/Entpd5/Entpd8/Upp2
REACTOME_DEACTIVATION_OF_THE_BETA_CATENIN_TRANSACTIVATING_COMPLEX	REACTOME_DEACTIVATION_OF_THE_BETA_CATENIN_TRANSACTIVATING_COMPLEX	30	0.136066	0.454713	1	1	0.888073	3613	tags=23%	list=20%	signal=19%	Tcf7l1/Tle1/Ubc/Xiap/Ctnnb1/Apc/Tle3
REACTOME_RHOBTB1_GTPASE_CYCLE	REACTOME_RHOBTB1_GTPASE_CYCLE	22	0.115762	0.351264	1	1	0.888073	11096	tags=91%	list=63%	signal=34%	Spen/Rock2/Rock1/Pde5a/Cul3/Cops2/Cct2/Rbbp6/Vim/Cct7/Stk38/Txnl1/Srrm1/Rbmx/Tra2b/Myo6/Hnrnpc/Rnf20/Gps1/Cpsf7
REACTOME_COMPLEX_IV_ASSEMBLY	REACTOME_COMPLEX_IV_ASSEMBLY	38	-0.110241	-0.337637	1	1	0.888073	5137	tags=16%	list=29%	signal=11%	Cox7a2l/Tmem177/Surf1/Cox6b2/Ndufa4/Cmc1
REACTOME_SIGNALING_BY_NTRK1_TRKA	REACTOME_SIGNALING_BY_NTRK1_TRKA	63	-0.114431	-0.383695	1	1	0.888073	6119	tags=21%	list=35%	signal=14%	Ppp2r1b/Grb2/Vrk3/Mapk1/Ap2s1/Chd4/Nab2/Ntrk1/Rapgef1/Dusp7/Rps6ka5/Mapk11/Egr2
REACTOME_SMAD2_SMAD3_SMAD4_HETEROTRIMER_REGULATES_TRANSCRIPTION	REACTOME_SMAD2_SMAD3_SMAD4_HETEROTRIMER_REGULATES_TRANSCRIPTION	25	-0.135994	-0.386052	1	1	0.888073	5744	tags=28%	list=32%	signal=19%	Uba52/Rnf111/Mapk1/Smad4/E2f5/Cdk9/Rps27a
REACTOME_KEAP1_NFE2L2_PATHWAY	REACTOME_KEAP1_NFE2L2_PATHWAY	76	-0.114849	-0.397377	1	1	0.888073	8347	tags=43%	list=47%	signal=23%	Ubb/Psmd9/Psmb4/Psma2/Psmf1/Psmc3/Akt2/Psmd5/Map1lc3b/Psmc1/Psme1/Prkci/Psmd13/Psmb10/Psma4/Uba52/Psmb1/Psma8/Psmc4/Psmd4/Rbx1/Psmb5/Psma6/Psmc5/Psmb6/Akt3/Psmd10/Psme2/Psmb8/Trim21/Skp1/Rps27a/Psme2b
REACTOME_RHOBTB_GTPASE_CYCLE	REACTOME_RHOBTB_GTPASE_CYCLE	34	-0.131723	-0.398262	1	1	0.888073	7487	tags=50%	list=42%	signal=29%	Txnl1/Srrm1/Rbmx/Tra2b/Cdc37/Myo6/Hnrnpc/Cct6a/Rnf20/Gps1/Cpsf7/Ddx39b/Rhobtb2/Cops4/Phip/Msi2/Rhobtb1
REACTOME_RAF_ACTIVATION	REACTOME_RAF_ACTIVATION	34	-0.134313	-0.406094	1	1	0.888073	1863	tags=32%	list=11%	signal=29%	Calm1/Ppp1cb/Braf/Calm3/Ppp2r5d/Ppp1cc/Araf/Ppp2r1b/Ppp2r5c/Mras/Camk2a
REACTOME_ENDOSOMAL_SORTING_COMPLEX_REQUIRED_FOR_TRANSPORT_ESCRT	REACTOME_ENDOSOMAL_SORTING_COMPLEX_REQUIRED_FOR_TRANSPORT_ESCRT	30	-0.141984	-0.418381	1	1	0.888073	8375	tags=50%	list=47%	signal=26%	Chmp4b/Ubb/Vps36/Chmp2b/Chmp7/Vps28/Vps25/Chmp6/Uba52/Snf8/Chmp2a/Mvb12a/Vps37c/Rps27a/Vps37d
REACTOME_SELECTIVE_AUTOPHAGY	REACTOME_SELECTIVE_AUTOPHAGY	70	-0.123401	-0.420917	1	1	0.888073	7370	tags=31%	list=42%	signal=18%	Ube2d2a/Usp30/Csnk2b/Tomm6/Tuba1a/Uba52/Park7/Pink1/Atg5/Tomm22/Fundc1/Tubb3/Tomm20/Tomm5/Tuba1b/Tomm7/Atm/Tubb1/Rps27a/Hdac6/Tubb2b/Tuba8
REACTOME_INTRA_GOLGI_AND_RETROGRADE_GOLGI_TO_ER_TRAFFIC	REACTOME_INTRA_GOLGI_AND_RETROGRADE_GOLGI_TO_ER_TRAFFIC	185	-0.113279	-0.436732	1	1	0.888073	7377	tags=31%	list=42%	signal=18%	Sec22b/Tmed2/Stx5a/Gosr2/Dctn3/Napg/Kif22/Rhobtb3/Bet1l/Bnip1/Tuba1a/Rab3gap2/Racgap1/Arfrp1/Kif5a/Vps45/Rint1/Kdelr1/Sys1/Alppl2/Rgp1/Rab6b/Zw10/Rabepk/M6pr/Klc2/Napa/Cog8/Agpat3/Kif21a/Tubb3/Use1/Arfgap2/Cenpe/Arfgap1/Kif26b/Tmed3/Copz1/Dctn6/Kif23/Tuba1b/Kif2c/Pafah1b3/Arf5/Scoc/Kdelr3/Kif18b/Napb/Kifc5b/Kif3a/Tubb1/Kif27/Tubb2b/Kif3c/Rab39/Kif18a/Cyth4/Tuba8
REACTOME_MACROAUTOPHAGY	REACTOME_MACROAUTOPHAGY	126	-0.121829	-0.451381	1	1	0.888073	7958	tags=37%	list=45%	signal=20%	Rheb/Ube2n/Tomm70a/Map1lc3b/Atg9b/Chmp7/Wdr45b/Lamtor5/Atg14/Mlst8/Ube2d2a/Usp30/Csnk2b/Tomm6/Prkag2/Chmp6/Lamtor1/Tuba1a/Uba52/Wipi2/Park7/Wdr45/Prkag1/Pink1/Atg5/Slc38a9/Tomm22/Chmp2a/Fundc1/Tubb3/Lamtor2/Tomm20/Tomm5/Prkag3/Tuba1b/Tomm7/Uvrag/Atm/Atg101/Tubb1/Rps27a/Lamtor4/Hdac6/Tubb2b/Rragb/Tuba8
REACTOME_SIGNALING_BY_FGFR3	REACTOME_SIGNALING_BY_FGFR3	36	-0.151193	-0.457582	1	1	0.888073	6562	tags=28%	list=37%	signal=18%	Uba52/Fgfr3/Grb2/Plcg1/Fgf2/Mapk1/Fgf16/Fgf17/Fgf23/Rps27a
REACTOME_HYALURONAN_METABOLISM	REACTOME_HYALURONAN_METABOLISM	17	-0.187082	-0.480766	0.991241	1	0.888073	7521	tags=53%	list=42%	signal=31%	Gusb/Hyal3/Hexa/Has2/Hmmr/Cd44/Abcc5/Has3/Cemip
REACTOME_COPI_MEDIATED_ANTEROGRADE_TRANSPORT	REACTOME_COPI_MEDIATED_ANTEROGRADE_TRANSPORT	93	-0.136896	-0.486567	1	1	0.888073	5486	tags=23%	list=31%	signal=16%	Napa/Cog8/Gorasp1/Tubb3/Arfgap2/Arfgap1/Tmed3/Copz1/Bet1/Dctn6/Tuba1b/Arf5/Sptbn5/Kdelr3/Napb/Tubb1/Sptbn4/Tubb2b/Sptb/Sptbn2/Tuba8
REACTOME_GOLGI_TO_ER_RETROGRADE_TRANSPORT	REACTOME_GOLGI_TO_ER_RETROGRADE_TRANSPORT	127	-0.133054	-0.493263	1	1	0.888073	5488	tags=30%	list=31%	signal=21%	Bnip1/Tuba1a/Rab3gap2/Racgap1/Kif5a/Rint1/Kdelr1/Rab6b/Zw10/Klc2/Napa/Agpat3/Kif21a/Tubb3/Use1/Arfgap2/Cenpe/Arfgap1/Kif26b/Tmed3/Copz1/Dctn6/Kif23/Tuba1b/Kif2c/Pafah1b3/Arf5/Kdelr3/Kif18b/Napb/Kifc5b/Kif3a/Tubb1/Kif27/Tubb2b/Kif3c/Kif18a/Tuba8
REACTOME_INOSITOL_PHOSPHATE_METABOLISM	REACTOME_INOSITOL_PHOSPHATE_METABOLISM	46	-0.155672	-0.494234	0.998675	1	0.888073	4961	tags=43%	list=28%	signal=31%	Ippk/Itpkc/Plcb4/Minpp1/Calm3/Ip6k1/Isyna1/Itpk1/Plcg1/Ip6k2/Plcd3/Nudt3/Nudt10/Ocrl/Inpp5d/Ip6k3/Inpp1/Itpkb/Pld4/Inpp4b
REACTOME_REGULATION_OF_TP53_DEGRADATION	REACTOME_REGULATION_OF_TP53_DEGRADATION	35	-0.167523	-0.506361	0.997257	1	0.888073	7785	tags=46%	list=44%	signal=26%	Akt2/Cdk1/Mdm4/Mlst8/Phf20/Uba52/Ppp2r1b/Cdk2/Rnf34/Ppp2r5c/Akt3/Chek2/Ccna1/Trp53/Atm/Rps27a
REACTOME_INTRA_GOLGI_TRAFFIC	REACTOME_INTRA_GOLGI_TRAFFIC	37	-0.166527	-0.507287	0.994498	1	0.888073	1171	tags=35%	list=7%	signal=33%	Cog3/Stx5a/Gosr2/Napg/Bet1l/Vps45/Alppl2/Rgp1/Napa/Cog8/Napb/Rab39/Cyth4
REACTOME_TCF_DEPENDENT_SIGNALING_IN_RESPONSE_TO_WNT	REACTOME_TCF_DEPENDENT_SIGNALING_IN_RESPONSE_TO_WNT	152	-0.136277	-0.512117	0.998862	1	0.888073	8225	tags=42%	list=46%	signal=23%	Psmd9/Psmb4/Pygo2/Leo1/Psma2/Psmf1/Psmc3/Xpo1/Akt2/Psmd5/Lgr5/Dact1/Psmc1/Csnk2b/Psme1/Ppp2r5d/Ruvbl1/Lef1/Klhl12/Bcl9l/Psmd13/Psmb10/Psma4/Uba52/Sox4/Psmb1/Psma8/Psmc4/Psmd4/Dvl1/Rbx1/Rbbp5/Trrap/Ppp2r1b/Ctnnbip1/Kat5/Psmb5/Psma6/Psmc5/Ctbp1/Psmb6/Rspo3/Rspo1/Cby1/Ppp2r5c/Psmd10/Sox7/Psme2/Psmb8/Tle2/Igfals/Ash2l/Dkk2/Dkk1/Wnt1/Amer1/Wnt3/Tert/Rps27a/Dvl2/Hecw1/Znrf3/Psme2b/Tcf7
REACTOME_REGULATION_OF_NF_KAPPA_B_SIGNALING	REACTOME_REGULATION_OF_NF_KAPPA_B_SIGNALING	16	-0.204408	-0.514591	0.988042	1	0.888073	2076	tags=50%	list=12%	signal=44%	Ubb/Casp8/Ikbkb/Uba52/Usp14/Traf2/Rps27a/Nlrc5
REACTOME_FORMATION_OF_THE_BETA_CATENIN_TCF_TRANSACTIVATING_COMPLEX	REACTOME_FORMATION_OF_THE_BETA_CATENIN_TCF_TRANSACTIVATING_COMPLEX	26	-0.179625	-0.517423	0.991792	1	0.888073	3600	tags=38%	list=20%	signal=31%	Ruvbl1/Lef1/Bcl9l/Rbbp5/Trrap/Kat5/Tle2/Ash2l/Tert/Tcf7
REACTOME_ASPARAGINE_N_LINKED_GLYCOSYLATION	REACTOME_ASPARAGINE_N_LINKED_GLYCOSYLATION	262	-0.132438	-0.520598	1	1	0.888073	4857	tags=19%	list=27%	signal=14%	Neu1/Arfgap2/Arfgap1/Col7a1/Dpm3/Fuom/Tmed3/Copz1/Bet1/Dctn6/Nudt14/Nagk/Ctsz/Tuba1b/Mgat4c/Dpm2/Renbp/Arf5/Mvd/Preb/St6galnac2/Sptbn5/Kdelr3/Alg8/Trappc4/B4galt3/Man1a/Napb/Gmppb/St6galnac3/St8sia4/Tubb1/Rps27a/Alg2/Sptbn4/Dpm1/Engase/F5/Tubb2b/Serpina1c/Sptb/St6gal1/St8sia1/Chst10/Chst8/Cnih2/Sptbn2/St6galnac1/Tuba8/Serpina1b
REACTOME_APOPTOTIC_FACTOR_MEDIATED_RESPONSE	REACTOME_APOPTOTIC_FACTOR_MEDIATED_RESPONSE	16	-0.207116	-0.521407	0.988042	1	0.888073	5662	tags=38%	list=32%	signal=26%	Apip/Mapk1/Aven/Bax/Diablo/Gsdmd
REACTOME_CYTOSOLIC_SULFONATION_OF_SMALL_MOLECULES	REACTOME_CYTOSOLIC_SULFONATION_OF_SMALL_MOLECULES	18	-0.204239	-0.531848	0.982634	1	0.888073	1496	tags=33%	list=8%	signal=31%	Slc35b2/Tpst2/Slc35b3/Podxl2/Slc26a1/Sult4a1
REACTOME_METABOLISM_OF_POLYAMINES	REACTOME_METABOLISM_OF_POLYAMINES	57	-0.161632	-0.534353	0.998729	1	0.888073	8225	tags=49%	list=46%	signal=26%	Psmd9/Psmb4/Psma2/Psmf1/Psmc3/Psmd5/Oaz1/Psmc1/Srm/Amd1/Psme1/Psmd13/Psmb10/Psma4/Psmb1/Psma8/Psmc4/Psmd4/Psmb5/Psma6/Psmc5/Psmb6/Psmd10/Psme2/Psmb8/Agmat/Sms/Psme2b
REACTOME_MITOCHONDRIAL_FATTY_ACID_BETA_OXIDATION	REACTOME_MITOCHONDRIAL_FATTY_ACID_BETA_OXIDATION	36	-0.17752	-0.53726	0.988904	1	0.888073	2270	tags=47%	list=13%	signal=41%	Ndufab1/Pccb/Hadhb/Pcca/Acads/Hadha/Decr1/Acadl/Eci1/Acot11/Acot2/Dbi/Hadh/Acaa2/Acbd6/Acot1/Them5
REACTOME_MTORC1_MEDIATED_SIGNALLING	REACTOME_MTORC1_MEDIATED_SIGNALLING	24	-0.190997	-0.537651	0.990278	1	0.888073	7958	tags=46%	list=45%	signal=25%	Rheb/Lamtor5/Eif4b/Mlst8/Fkbp1a/Lamtor1/Slc38a9/Lamtor2/Rps6/Lamtor4/Rragb
REACTOME_NEGATIVE_REGULATION_OF_MAPK_PATHWAY	REACTOME_NEGATIVE_REGULATION_OF_MAPK_PATHWAY	42	-0.172194	-0.537811	0.99328	1	0.888073	693	tags=29%	list=4%	signal=28%	Ppp2r5d/Araf/Uba52/Ppp2r1b/Mapk1/Ppp2r5c/Mapk12/Pebp1/Dusp7/Rps27a/Dusp2/Ptpn7
REACTOME_SIGNALING_BY_CSF3_G_CSF	REACTOME_SIGNALING_BY_CSF3_G_CSF	21	-0.198953	-0.542775	0.97905	1	0.888073	7370	tags=57%	list=42%	signal=33%	Ube2d2a/Eloc/Uba52/Elob/Grb2/Rnf7/Syk/Lyn/Socs1/Ube2d1/Rps27a/Socs3
REACTOME_MAPK6_MAPK4_SIGNALING	REACTOME_MAPK6_MAPK4_SIGNALING	72	-0.159206	-0.547671	0.996305	1	0.888073	8347	tags=46%	list=47%	signal=24%	Ubb/Psmd9/Psmb4/Psma2/Psmf1/Psmc3/Xpo1/Psmd5/Cdk1/Psmc1/Psme1/Cdc42ep5/Psmd13/Psmb10/Psma4/Uba52/Psmb1/Psma8/Psmc4/Psmd4/Psmb5/Psma6/Psmc5/Psmb6/Prkacb/Psmd10/Psme2/Psmb8/Pak3/Rps27a/Ccnd3/Mapk4/Psme2b
REACTOME_BIOSYNTHESIS_OF_THE_N_GLYCAN_PRECURSOR_DOLICHOL_LIPID_LINKED_OLIGOSACCHARIDE_LLO_AND_TRANSFER_TO_A_NASCENT_PROTEIN	REACTOME_BIOSYNTHESIS_OF_THE_N_GLYCAN_PRECURSOR_DOLICHOL_LIPID_LINKED_OLIGOSACCHARIDE_LLO_AND_TRANSFER_TO_A_NASCENT_PROTEIN	73	-0.161031	-0.555322	0.996305	1	0.888073	4544	tags=23%	list=26%	signal=17%	Dpm3/Fuom/Nudt14/Nagk/Dpm2/Renbp/Mvd/St6galnac2/Alg8/Gmppb/St6galnac3/St8sia4/Alg2/Dpm1/St6gal1/St8sia1/St6galnac1
REACTOME_TRANSPORT_TO_THE_GOLGI_AND_SUBSEQUENT_MODIFICATION	REACTOME_TRANSPORT_TO_THE_GOLGI_AND_SUBSEQUENT_MODIFICATION	176	-0.144967	-0.555914	1	1	0.888073	5755	tags=23%	list=32%	signal=16%	Areg/Ppp6c/Trappc2l/Tfg/Napa/Cog8/Trappc3/Gorasp1/Tubb3/Arfgap2/Arfgap1/Col7a1/Tmed3/Copz1/Bet1/Dctn6/Ctsz/Tuba1b/Mgat4c/Arf5/Preb/Sptbn5/Kdelr3/Trappc4/B4galt3/Man1a/Napb/Tubb1/Sptbn4/F5/Tubb2b/Serpina1c/Sptb/St6gal1/Chst10/Chst8/Cnih2/Sptbn2/Tuba8/Serpina1b
REACTOME_NUCLEAR_EVENTS_MEDIATED_BY_NFE2L2	REACTOME_NUCLEAR_EVENTS_MEDIATED_BY_NFE2L2	54	-0.170421	-0.559223	0.992278	1	0.888073	8525	tags=52%	list=48%	signal=27%	Psma7/Ubb/Psmd9/Psmb4/Psma2/Psmf1/Psmc3/Psmd5/Psmc1/Psme1/Psmd13/Psmb10/Psma4/Uba52/Psmb1/Psmc4/Psmd4/Rbx1/Psmb5/Psma6/Psmc5/Psmb6/Psmd10/Psme2/Psmb8/Skp1/Rps27a/Psme2b
REACTOME_NEGATIVE_REGULATION_OF_FGFR3_SIGNALING	REACTOME_NEGATIVE_REGULATION_OF_FGFR3_SIGNALING	26	-0.195214	-0.562326	0.98632	1	0.888073	2829	tags=35%	list=16%	signal=29%	Uba52/Fgfr3/Grb2/Fgf2/Mapk1/Fgf16/Fgf17/Fgf23/Rps27a
REACTOME_RETROGRADE_TRANSPORT_AT_THE_TRANS_GOLGI_NETWORK	REACTOME_RETROGRADE_TRANSPORT_AT_THE_TRANS_GOLGI_NETWORK	45	-0.179557	-0.566878	0.99336	1	0.888073	9503	tags=62%	list=54%	signal=29%	Vti1a/Tgoln1/Stx6/Nsf/Vamp4/Cog7/Cog6/Rab9/Ric1/Golga1/Rab9b/Arl1/Plin3/Gcc2/Gcc1/Cog3/Napg/Rhobtb3/Arfrp1/Sys1/Rgp1/Rab6b/Rabepk/M6pr/Napa/Cog8/Scoc/Napb
REACTOME_SIGNALING_BY_TGFBR3	REACTOME_SIGNALING_BY_TGFBR3	21	-0.20794	-0.567291	0.973464	1	0.888073	1798	tags=33%	list=10%	signal=30%	Inha/Tgfbr2/Fgf2/Psenen/Tgfb2/Tgfb1/Arrb2
REACTOME_RIPK1_MEDIATED_REGULATED_NECROSIS	REACTOME_RIPK1_MEDIATED_REGULATED_NECROSIS	31	-0.190768	-0.568792	0.978052	1	0.888073	5751	tags=58%	list=32%	signal=39%	Tnfrsf10b/Ube2l3/Birc2/Ubb/Cdc37/Casp8/Tradd/Ripk3/Uba52/Fasl/Stub1/Ogt/Traf2/Flot2/Fas/Birc3/Rps27a/Tnfsf10
REACTOME_CELLULAR_RESPONSE_TO_HEAT_STRESS	REACTOME_CELLULAR_RESPONSE_TO_HEAT_STRESS	82	-0.164564	-0.576836	0.998786	1	0.888073	7152	tags=35%	list=40%	signal=21%	Aaas/Ywhae/Hspa14/Nup62/Ndc1/Nup153/Hsbp1/Nup35/Dnajb6/Eef1a1/Pom121/Mapk1/Nup93/Nup214/Hspa13/Rps19bp1/Nup85/Bag5/Nup133/Hsf1/Nup155/Nup107/Rpa2/Hspa1l/Rae1/Rpa1/Hdac6/Camk2a/Nup210
REACTOME_GABA_SYNTHESIS_RELEASE_REUPTAKE_AND_DEGRADATION	REACTOME_GABA_SYNTHESIS_RELEASE_REUPTAKE_AND_DEGRADATION	18	-0.222272	-0.578806	0.956585	1	0.888073	5592	tags=33%	list=32%	signal=23%	Vamp2/Snap25/Cplx1/Gad1/Rab3a/Syt1
REACTOME_SIGNALING_BY_FGFR4	REACTOME_SIGNALING_BY_FGFR4	37	-0.191089	-0.582113	0.984869	1	0.888073	2829	tags=14%	list=16%	signal=11%	Fgf16/Fgf17/Fgf23/Rps27a/Fgfr4
REACTOME_ER_TO_GOLGI_ANTEROGRADE_TRANSPORT	REACTOME_ER_TO_GOLGI_ANTEROGRADE_TRANSPORT	148	-0.155782	-0.584399	0.998864	1	0.888073	5755	tags=23%	list=32%	signal=16%	Areg/Ppp6c/Trappc2l/Tfg/Napa/Cog8/Trappc3/Gorasp1/Tubb3/Arfgap2/Arfgap1/Col7a1/Tmed3/Copz1/Bet1/Dctn6/Ctsz/Tuba1b/Arf5/Preb/Sptbn5/Kdelr3/Trappc4/Napb/Tubb1/Sptbn4/F5/Tubb2b/Serpina1c/Sptb/Cnih2/Sptbn2/Tuba8/Serpina1b
REACTOME_RUNX1_REGULATES_TRANSCRIPTION_OF_GENES_INVOLVED_IN_DIFFERENTIATION_OF_HSCS	REACTOME_RUNX1_REGULATES_TRANSCRIPTION_OF_GENES_INVOLVED_IN_DIFFERENTIATION_OF_HSCS	65	-0.173437	-0.585055	0.99493	1	0.888073	6624	tags=52%	list=37%	signal=33%	Ubb/Psmd9/Psmb4/Psma2/Psmf1/Psmc3/Psmd5/Psmc1/Psme1/Cdk7/Psmd13/Psmb10/Psma4/Uba52/Psmb1/Psma8/Psmc4/Psmd4/Psmb5/Kmt2a/Cbfb/Psma6/Psmc5/Psmb6/Psmd10/Psme2/Psmb8/Ldb1/Mnat1/Ccnh/Tcf3/Rps27a/Lmo2/Psme2b
REACTOME_AUF1_HNRNP_D0_BINDS_AND_DESTABILIZES_MRNA	REACTOME_AUF1_HNRNP_D0_BINDS_AND_DESTABILIZES_MRNA	54	-0.178567	-0.585953	0.98713	1	0.888073	8525	tags=54%	list=48%	signal=28%	Psma7/Ubb/Psmd9/Psmb4/Psma2/Psmf1/Psmc3/Psmd5/Psmc1/Psme1/Pabpc1/Psmd13/Psmb10/Psma4/Uba52/Psmb1/Psma8/Psmc4/Psmd4/Psmb5/Psma6/Psmc5/Psmb6/Psmd10/Psme2/Psmb8/Hnrnpd/Rps27a/Psme2b
REACTOME_PLASMA_LIPOPROTEIN_CLEARANCE	REACTOME_PLASMA_LIPOPROTEIN_CLEARANCE	35	-0.194842	-0.588937	0.982167	1	0.888073	2573	tags=49%	list=15%	signal=42%	Ldlr/Scarb1/Clta/Ap2a2/Ces3a/Ldlrap1/Npc2/Uba52/Apobr/Soat1/Ap2s1/Nceh1/Nr1h3/Apoa1/Rps27a/Apoc4/Lipc
REACTOME_MTOR_SIGNALLING	REACTOME_MTOR_SIGNALLING	41	-0.190924	-0.594066	0.98255	1	0.888073	8003	tags=44%	list=45%	signal=24%	Cab39l/Rheb/Akt2/Lamtor5/Eif4b/Mlst8/Fkbp1a/Prkag2/Lamtor1/Prkag1/Slc38a9/Lamtor2/Prkag3/Stk11/Rps6/Strada/Lamtor4/Rragb
REACTOME_IRON_UPTAKE_AND_TRANSPORT	REACTOME_IRON_UPTAKE_AND_TRANSPORT	51	-0.186823	-0.605339	0.977951	1	0.888073	3605	tags=39%	list=20%	signal=31%	Slc11a2/Fbxl5/Atp6v0c/Slc40a1/Uba52/Atp6v0d1/Atp6v1f/Atp6v1g1/Atp6v0e/Cp/Nedd8/Atp6v1d/Skp1/Lcn2/Atp6v1g3/Rps27a/Slc22a17/Atp6v0d2/Atp6v1g2/Tfr2
REACTOME_INACTIVATION_OF_CSF3_G_CSF_SIGNALING	REACTOME_INACTIVATION_OF_CSF3_G_CSF_SIGNALING	17	-0.236029	-0.606551	0.945985	1	0.888073	3987	tags=65%	list=22%	signal=50%	Ube2d2a/Eloc/Uba52/Elob/Rnf7/Syk/Lyn/Socs1/Ube2d1/Rps27a/Socs3
REACTOME_UB_SPECIFIC_PROCESSING_PROTEASES	REACTOME_UB_SPECIFIC_PROCESSING_PROTEASES	175	-0.159511	-0.611237	0.998894	1	0.888073	6624	tags=29%	list=37%	signal=18%	Psmd13/Psmb10/H2aj/Psma4/Wdr20/Uba52/Usp14/Tab1/Psmb1/Psma8/Psmc4/Psmd4/Trrap/Foxo4/Psmb5/Psma6/Psmc5/Polb/Psmb6/Cdc20/H2ac15/Smad4/Traf2/Kat2a/Taf10/Psmd10/H2ac13/Psme2/Tomm20/Psmb8/Myc/Usp20/Ccna1/Usp42/Trp53/Taf9b/Ddb2/Birc3/Usp29/Rps27a/Usp44/Nfkbia/Ccp110/Psme2b/Adrb2/H2ac7/Clspn/Arrb2/H2ac23/H2ac6/Usp11
REACTOME_CA_DEPENDENT_EVENTS	REACTOME_CA_DEPENDENT_EVENTS	26	-0.213479	-0.614942	0.95212	1	0.888073	1965	tags=12%	list=11%	signal=10%	Pde1b/Pde1c/Prkar1b
REACTOME_TRANSCRIPTIONAL_ACTIVITY_OF_SMAD2_SMAD3_SMAD4_HETEROTRIMER	REACTOME_TRANSCRIPTIONAL_ACTIVITY_OF_SMAD2_SMAD3_SMAD4_HETEROTRIMER	38	-0.200828	-0.615081	0.984952	1	0.888073	5744	tags=24%	list=32%	signal=16%	Rnf111/Mapk1/Tgif2/Smad4/E2f5/Cdk9/Ube2d1/Rps27a/Parp1
REACTOME_CELLULAR_RESPONSE_TO_HYPOXIA	REACTOME_CELLULAR_RESPONSE_TO_HYPOXIA	68	-0.181238	-0.618059	0.977556	1	0.888073	8347	tags=53%	list=47%	signal=28%	Ubb/Psmd9/Psmb4/Psma2/Psmf1/Psmc3/Psmd5/Psmc1/Ube2d2a/Psme1/Eloc/Psmd13/Psmb10/Psma4/Uba52/Elob/Egln2/Psmb1/Psma8/Psmc4/Psmd4/Vhl/Rbx1/Psmb5/Psma6/Psmc5/Psmb6/Wtip/Psmd10/Psme2/Psmb8/Ube2d1/Ajuba/Rps27a/Psme2b/Hif3a
REACTOME_ONCOGENE_INDUCED_SENESCENCE	REACTOME_ONCOGENE_INDUCED_SENESCENCE	16	-0.245511	-0.618066	0.944694	1	0.888073	7667	tags=62%	list=43%	signal=35%	Cdk6/Mdm4/Erf/Uba52/Mapk1/Cdk4/Trp53/Id1/Rps27a/Ets1
REACTOME_RHO_GTPASES_ACTIVATE_IQGAPS	REACTOME_RHO_GTPASES_ACTIVATE_IQGAPS	29	-0.212592	-0.624814	0.95258	1	0.888073	2099	tags=21%	list=12%	signal=18%	Tubb3/Tuba1b/Iqgap3/Tubb1/Tubb2b/Tuba8
REACTOME_REGULATION_OF_HSF1_MEDIATED_HEAT_SHOCK_RESPONSE	REACTOME_REGULATION_OF_HSF1_MEDIATED_HEAT_SHOCK_RESPONSE	63	-0.187675	-0.629286	0.975827	1	0.888073	7152	tags=40%	list=40%	signal=24%	Aaas/Ywhae/Hspa14/Nup62/Ndc1/Nup153/Nup35/Dnajb6/Pom121/Mapk1/Nup93/Nup214/Hspa13/Rps19bp1/Nup85/Bag5/Nup133/Hsf1/Nup155/Nup107/Rpa2/Hspa1l/Rae1/Rpa1/Nup210
REACTOME_ENDOSOMAL_VACUOLAR_PATHWAY	REACTOME_ENDOSOMAL_VACUOLAR_PATHWAY	17	-0.245255	-0.630261	0.932847	1	0.888073	4234	tags=35%	list=24%	signal=27%	H2-Q4/H2-T22/H2-M2/H2-Q7/H2-M3/H2-Q6
REACTOME_NUCLEOTIDE_SALVAGE	REACTOME_NUCLEOTIDE_SALVAGE	22	-0.229483	-0.630644	0.942737	1	0.888073	4609	tags=27%	list=26%	signal=20%	Dck/Ampd2/Aprt/Pnp/Tk2/Pnp2
REACTOME_SYNTHESIS_OF_PIPS_AT_THE_GOLGI_MEMBRANE	REACTOME_SYNTHESIS_OF_PIPS_AT_THE_GOLGI_MEMBRANE	17	-0.246134	-0.632519	0.925547	1	0.888073	5750	tags=29%	list=32%	signal=20%	Pi4kb/Pik3c2a/Pikfyve/Ocrl/Tpte
REACTOME_RECYCLING_PATHWAY_OF_L1	REACTOME_RECYCLING_PATHWAY_OF_L1	36	-0.210904	-0.638299	0.962552	1	0.888073	2099	tags=25%	list=12%	signal=22%	Mapk1/Rdx/Ap2s1/Tubb3/Tuba1b/Tubb1/Msn/Tubb2b/Tuba8
REACTOME_COMPLEX_III_ASSEMBLY	REACTOME_COMPLEX_III_ASSEMBLY	16	-0.25657	-0.645906	0.928251	1	0.888073	4408	tags=31%	list=25%	signal=23%	Ttc19/Fxn/Uqcrh/Lyrm4/Lyrm7
REACTOME_DEGRADATION_OF_BETA_CATENIN_BY_THE_DESTRUCTION_COMPLEX	REACTOME_DEGRADATION_OF_BETA_CATENIN_BY_THE_DESTRUCTION_COMPLEX	78	-0.186273	-0.648334	0.985401	1	0.888073	8347	tags=46%	list=47%	signal=25%	Ubb/Psmd9/Psmb4/Psma2/Psmf1/Psmc3/Psmd5/Psmc1/Psme1/Ppp2r5d/Lef1/Psmd13/Psmb10/Psma4/Uba52/Psmb1/Psma8/Psmc4/Psmd4/Rbx1/Ppp2r1b/Psmb5/Psma6/Psmc5/Ctbp1/Psmb6/Ppp2r5c/Psmd10/Psme2/Psmb8/Skp1/Tle2/Amer1/Rps27a/Psme2b/Tcf7
REACTOME_SPHINGOLIPID_DE_NOVO_BIOSYNTHESIS	REACTOME_SPHINGOLIPID_DE_NOVO_BIOSYNTHESIS	26	-0.22804	-0.656886	0.922025	1	0.888073	5530	tags=35%	list=31%	signal=24%	Sptssb/Sptlc1/Sphk1/Ormdl3/Cers1/Abcc1/Cers4/Cers3/Fa2h
REACTOME_TBC_RABGAPS	REACTOME_TBC_RABGAPS	34	-0.218891	-0.661815	0.941096	1	0.888073	3271	tags=12%	list=18%	signal=10%	Tbc1d17/Tbc1d7/Rab8b/Tbc1d10c
REACTOME_N_GLYCAN_ANTENNAE_ELONGATION_IN_THE_MEDIAL_TRANS_GOLGI	REACTOME_N_GLYCAN_ANTENNAE_ELONGATION_IN_THE_MEDIAL_TRANS_GOLGI	23	-0.240602	-0.667506	0.922644	1	0.888073	1350	tags=13%	list=8%	signal=12%	St6gal1/Chst10/Chst8
REACTOME_PLASMA_LIPOPROTEIN_ASSEMBLY_REMODELING_AND_CLEARANCE	REACTOME_PLASMA_LIPOPROTEIN_ASSEMBLY_REMODELING_AND_CLEARANCE	62	-0.199262	-0.668001	0.966921	1	0.888073	2573	tags=16%	list=15%	signal=14%	Nr1h3/Apoa1/Apoa5/Rps27a/A2m/Lcat/Apoc4/Abcg1/Angptl4/Lipc
REACTOME_REGULATION_OF_PTEN_STABILITY_AND_ACTIVITY	REACTOME_REGULATION_OF_PTEN_STABILITY_AND_ACTIVITY	67	-0.197554	-0.672543	0.96402	1	0.888073	8347	tags=48%	list=47%	signal=25%	Ubb/Psmd9/Psmb4/Psma2/Psmf1/Psmc3/Akt2/Psmd5/Psmc1/Csnk2b/Psme1/Psmd13/Psmb10/Psma4/Uba52/Psmb1/Psma8/Psmc4/Psmd4/Psmb5/Psma6/Stub1/Wwp2/Psmc5/Psmb6/Akt3/Psmd10/Psme2/Psmb8/Trim27/Rps27a/Psme2b
REACTOME_TRANSCRIPTIONAL_AND_POST_TRANSLATIONAL_REGULATION_OF_MITF_M_EXPRESSION_AND_ACTIVITY	REACTOME_TRANSCRIPTIONAL_AND_POST_TRANSLATIONAL_REGULATION_OF_MITF_M_EXPRESSION_AND_ACTIVITY	17	-0.26276	-0.675245	0.891971	1	0.888073	5973	tags=47%	list=34%	signal=31%	Sox10/Mapk1/Aimp2/Aimp1/Akt3/Hint1/Eef1e1/Mitf
REACTOME_ADHERENS_JUNCTIONS_INTERACTIONS	REACTOME_ADHERENS_JUNCTIONS_INTERACTIONS	38	-0.222829	-0.682464	0.93844	1	0.888073	3648	tags=24%	list=21%	signal=19%	Ang/Cadm1/Cdh24/Adam19/Cdh4/Ilf3/Nectin4/Cdh9/Angptl4
REACTOME_CELL_CELL_JUNCTION_ORGANIZATION	REACTOME_CELL_CELL_JUNCTION_ORGANIZATION	46	-0.215046	-0.682741	0.925828	1	0.888073	3648	tags=17%	list=21%	signal=14%	Cdh24/Adam19/Cdh4/Ilf3/Pard6a/Nectin4/Cdh9/Angptl4
REACTOME_NEGATIVE_REGULATION_OF_FGFR4_SIGNALING	REACTOME_NEGATIVE_REGULATION_OF_FGFR4_SIGNALING	28	-0.233984	-0.684617	0.909218	1	0.888073	2829	tags=18%	list=16%	signal=15%	Fgf16/Fgf17/Fgf23/Rps27a/Fgfr4
REACTOME_EPH_EPHRIN_MEDIATED_REPULSION_OF_CELLS	REACTOME_EPH_EPHRIN_MEDIATED_REPULSION_OF_CELLS	34	-0.227379	-0.687479	0.921918	1	0.888073	3795	tags=24%	list=21%	signal=19%	Lyn/Efna2/Ephb3/Ephb6/Fyn/Efnb3/Ephb1/Epha6
REACTOME_CASPASE_ACTIVATION_VIA_EXTRINSIC_APOPTOTIC_SIGNALLING_PATHWAY	REACTOME_CASPASE_ACTIVATION_VIA_EXTRINSIC_APOPTOTIC_SIGNALLING_PATHWAY	19	-0.260898	-0.688802	0.890173	1	0.888073	4954	tags=37%	list=28%	signal=27%	Fasl/Traf2/Ticam2/Cd14/Fas/Tnfsf10/Dcc
REACTOME_REGULATION_OF_RAS_BY_GAPS	REACTOME_REGULATION_OF_RAS_BY_GAPS	65	-0.204585	-0.690128	0.956907	1	0.888073	8347	tags=48%	list=47%	signal=25%	Ubb/Psmd9/Psmb4/Rasal2/Psma2/Psmf1/Psmc3/Psmd5/Psmc1/Psme1/Rasa3/Psmd13/Psmb10/Psma4/Uba52/Psmb1/Psma8/Psmc4/Psmd4/Rbx1/Psmb5/Psma6/Psmc5/Psmb6/Psmd10/Psme2/Psmb8/Rps27a/Psme2b/Rasal3/Rasal1
REACTOME_MATURATION_OF_TCA_ENZYMES_AND_REGULATION_OF_TCA_CYCLE	REACTOME_MATURATION_OF_TCA_ENZYMES_AND_REGULATION_OF_TCA_CYCLE	18	-0.26723	-0.695879	0.879884	1	0.888073	4602	tags=28%	list=26%	signal=21%	Isca2/Fxn/Lyrm4/Sdhaf3/Sdhaf1
REACTOME_P75_NTR_RECEPTOR_MEDIATED_SIGNALLING	REACTOME_P75_NTR_RECEPTOR_MEDIATED_SIGNALLING	84	-0.199139	-0.697544	0.953883	1	0.888073	2076	tags=11%	list=12%	signal=10%	Rps27a/Fgd1/Ripk2/Nfkbia/Ngfr/Arhgef6/Omg/Fgd3/Arhgef33
REACTOME_DEUBIQUITINATION	REACTOME_DEUBIQUITINATION	245	-0.178848	-0.700576	0.991426	1	0.888073	6629	tags=31%	list=37%	signal=20%	Ino80e/Psmd13/Psmb10/H2aj/Psma4/Wdr20/Uba52/Usp14/Tab1/Hcfc1/Asxl1/Psmb1/Psma8/Psmc4/Psmd4/Trrap/Uchl5/Foxo4/Mcrs1/Uimc1/Psmb5/Psma6/Psmc5/Ogt/Polb/Psmb6/Josd2/Cdc20/H2ac15/Smad4/Traf2/Kat2a/Taf10/Psmd10/Nedd8/H2ac13/Psme2/Tomm20/Psmb8/Myc/Uchl3/Usp20/Ccna1/Usp42/Trp53/Traf3/Taf9b/Senp8/Tnip3/Ino80b/Atxn3/Tnfaip3/Ddb2/Ube2d1/Birc3/Otub2/Brca1/Usp29/Rps27a/Usp44/Bard1/Ripk2/Nod1/Uchl1/Nfkbia/Ccp11…
REACTOME_COPI_DEPENDENT_GOLGI_TO_ER_RETROGRADE_TRAFFIC	REACTOME_COPI_DEPENDENT_GOLGI_TO_ER_RETROGRADE_TRAFFIC	95	-0.196567	-0.701264	0.949153	1	0.888073	5488	tags=27%	list=31%	signal=19%	Klc2/Napa/Kif21a/Tubb3/Use1/Arfgap2/Cenpe/Arfgap1/Kif26b/Tmed3/Copz1/Kif23/Tuba1b/Kif2c/Arf5/Kdelr3/Kif18b/Napb/Kifc5b/Kif3a/Tubb1/Kif27/Tubb2b/Kif3c/Kif18a/Tuba8
REACTOME_GOLGI_ASSOCIATED_VESICLE_BIOGENESIS	REACTOME_GOLGI_ASSOCIATED_VESICLE_BIOGENESIS	54	-0.214593	-0.704171	0.90991	1	0.888073	5909	tags=28%	list=33%	signal=19%	Dtnbp1/Snx2/Ap1s2/Tpd52l1/Vamp2/Napa/Hip1r/Snx5/Pik3c2a/Txndc5/Vamp8/Ap1s3/Ocrl/Bloc1s4/Dnajc6
REACTOME_INSULIN_RECEPTOR_SIGNALLING_CASCADE	REACTOME_INSULIN_RECEPTOR_SIGNALLING_CASCADE	40	-0.227258	-0.70504	0.915209	1	0.888073	3346	tags=20%	list=19%	signal=16%	Fgf22/Kl/Fgf16/Fgf17/Fgf23/Fgfr4/Flt3l/Tlr9
REACTOME_HEDGEHOG_ON_STATE	REACTOME_HEDGEHOG_ON_STATE	80	-0.202764	-0.706439	0.933905	1	0.888073	6624	tags=34%	list=37%	signal=21%	Psmd13/Psmb10/Psma4/Uba52/Sufu/Psmb1/Psma8/Psmc4/Psmd4/Rbx1/Dzip1/Grk2/Psmb5/Cdon/Psma6/Psmc5/Psmb6/Kif7/Psmd10/Psme2/Psmb8/Shh/Kif3a/Rps27a/Psme2b/Dhh/Arrb2
REACTOME_OTHER_INTERLEUKIN_SIGNALING	REACTOME_OTHER_INTERLEUKIN_SIGNALING	15	-0.287428	-0.709368	0.863429	1	0.888073	5740	tags=47%	list=32%	signal=32%	Sdc1/Vamp2/Snap25/Txlna/Cd4/Csf1/Il16
REACTOME_PARACETAMOL_ADME	REACTOME_PARACETAMOL_ADME	29	-0.241751	-0.710512	0.888424	1	0.888073	6988	tags=52%	list=39%	signal=31%	Ggt7/Gstm2/Abcc4/Ggt6/Nat2/Ugt1a1/Ugt1a9/Abcc5/Ugt2b5/Ugt2b1/Abcc3/Abcc1/Gstt1/Ugt1a6a/Ugt1a8
REACTOME_KINESINS	REACTOME_KINESINS	56	-0.21557	-0.710644	0.928021	1	0.888073	5488	tags=30%	list=31%	signal=21%	Klc2/Kif21a/Tubb3/Cenpe/Kif26b/Kif23/Tuba1b/Kif2c/Kif18b/Kifc5b/Kif3a/Tubb1/Kif27/Tubb2b/Kif3c/Kif18a/Tuba8
REACTOME_REGULATION_OF_SIGNALING_BY_CBL	REACTOME_REGULATION_OF_SIGNALING_BY_CBL	21	-0.260549	-0.710816	0.877095	1	0.888073	4272	tags=29%	list=24%	signal=22%	Rapgef1/Syk/Lyn/Rps27a/Fyn/Pik3cd
REACTOME_ACYL_CHAIN_REMODELLING_OF_PS	REACTOME_ACYL_CHAIN_REMODELLING_OF_PS	19	-0.271271	-0.716188	0.856936	1	0.888073	6211	tags=42%	list=35%	signal=27%	Pla2g2d/Pla2g12a/Pla2g4b/Pla2g5/Pla2g4e/Lpcat4/Pla2g2e/Pla2g2f
REACTOME_METABOLISM_OF_WATER_SOLUBLE_VITAMINS_AND_COFACTORS	REACTOME_METABOLISM_OF_WATER_SOLUBLE_VITAMINS_AND_COFACTORS	113	-0.196901	-0.716757	0.933255	1	0.888073	5174	tags=26%	list=29%	signal=18%	Nmnat3/Vnn1/Shmt1/Coasy/Naprt/Mthfs/Acacb/Parp10/Mthfsl/Mocs1/Nadk2/Mthfd2l/Nampt/Slc52a2/Mtr/Mmab/Abcc1/Cblif/Slc25a19/Mtrr/Slc19a1/Mocs3/Parp8/Mthfd1l/Nmrk1/Cd38/Aldh1l2/Slc2a3/Qprt
REACTOME_DOWNSTREAM_SIGNALING_OF_ACTIVATED_FGFR4	REACTOME_DOWNSTREAM_SIGNALING_OF_ACTIVATED_FGFR4	23	-0.259917	-0.721092	0.862166	1	0.888073	2829	tags=30%	list=16%	signal=26%	Grb2/Plcg1/Fgf2/Fgf16/Fgf17/Fgf23/Fgfr4
REACTOME_CELLULAR_RESPONSES_TO_STIMULI	REACTOME_CELLULAR_RESPONSES_TO_STIMULI	497	-0.177733	-0.723791	0.994903	1	0.888073	6748	tags=32%	list=38%	signal=21%	Nup62/Lamtor1/Hdac3/Ndc1/Erf/Tuba1a/Nup153/Hsbp1/H2bc9/Psmd13/Psmb10/Rad50/H2aj/Psma4/Uba52/Elob/Lmnb1/Atp6v0d1/Nup35/Smarcd3/Egln2/Psmb1/Atp6v1f/Psma8/Asf1a/Rbbp7/Psmc4/Dnajb6/H1f2/Psmd4/Ube2e1/Vhl/Rbx1/Atp6v1g1/Atp6v0e/H1f1/Txnrd2/Creb3/Eef1a1/Eif2s3x/Mt2/Kat5/Pom121/Psmb5/Flcn/Psma6/Mapk1/Pgr/Slc38a9/Psmc5/Nup93/Psmb6/Cdk2/Ube2s/Wtip/Anapc16/Acd/Anapc10/Ehmt2/Ccs/Nup214/Hspa13/Cdc26/Rps19bp1/C…
REACTOME_APOPTOSIS	REACTOME_APOPTOSIS	101	-0.202948	-0.726401	0.938628	1	0.888073	1862	tags=32%	list=11%	signal=29%	H1f2/Gas2/H1f1/Fnta/Hmgb1/Fasl/Dffa/Apip/Mapk1/Dffb/Traf2/Hmgb2/Aven/Gzmb/Ticam2/Bax/Bmf/Diablo/Cd14/Fas/Dsg1a/Pmaip1/Ppp3cc/Tnfsf10/Gsdmd/Mapt/Stk26/Satb1/Prkcq/Clspn/Dcc/Bcl2
REACTOME_FACTORS_INVOLVED_IN_MEGAKARYOCYTE_DEVELOPMENT_AND_PLATELET_PRODUCTION	REACTOME_FACTORS_INVOLVED_IN_MEGAKARYOCYTE_DEVELOPMENT_AND_PLATELET_PRODUCTION	125	-0.197153	-0.729248	0.951501	1	0.888073	4598	tags=22%	list=26%	signal=17%	Kif26b/Rad51b/H3c10/Kif23/Tuba1b/Kif2c/Zfpm1/H3c4/H3c8/Phf21a/Kif18b/H3c13/Kifc5b/Kif3a/H3c3/Sh2b3/Tubb1/Kif27/Tubb2b/Kif3c/Dock2/Dock11/Kif18a/H3c6/Dock10/Prkar1b/Tuba8/H3c14
REACTOME_SIGNALING_BY_BMP	REACTOME_SIGNALING_BY_BMP	29	-0.249784	-0.734122	0.856346	1	0.888073	3540	tags=21%	list=20%	signal=17%	Amhr2/Ube2d1/Smad6/Smad9/Nog/Amh
REACTOME_ASYMMETRIC_LOCALIZATION_OF_PCP_PROTEINS	REACTOME_ASYMMETRIC_LOCALIZATION_OF_PCP_PROTEINS	60	-0.219925	-0.73441	0.912548	1	0.888073	8525	tags=57%	list=48%	signal=30%	Psma1/Fzd7/Psmd7/Fzd1/Psma7/Prickle1/Ubb/Psmd9/Psmb4/Psma2/Psmf1/Psmc3/Psmd5/Psmc1/Psme1/Psmd13/Psmb10/Psma4/Uba52/Psmb1/Psma8/Psmc4/Psmd4/Psmb5/Psma6/Psmc5/Psmb6/Psmd10/Psme2/Psmb8/Pard6a/Rps27a/Dvl2/Psme2b
REACTOME_INTRINSIC_PATHWAY_FOR_APOPTOSIS	REACTOME_INTRINSIC_PATHWAY_FOR_APOPTOSIS	38	-0.239943	-0.734878	0.880985	1	0.888073	5662	tags=29%	list=32%	signal=20%	Apip/Mapk1/Aven/Gzmb/Bax/Bmf/Diablo/Pmaip1/Ppp3cc/Gsdmd/Bcl2
REACTOME_SEMA4D_IN_SEMAPHORIN_SIGNALING	REACTOME_SEMA4D_IN_SEMAPHORIN_SIGNALING	15	-0.29785	-0.735087	0.842185	1	0.888073	1507	tags=13%	list=9%	signal=12%	Rnd1/Sema4d
REACTOME_AZATHIOPRINE_ADME	REACTOME_AZATHIOPRINE_ADME	23	-0.265149	-0.735607	0.845288	1	0.888073	7531	tags=57%	list=42%	signal=33%	Nme2/Nudt15/Nme1/Gstm2/Abcc4/Impdh2/Gmps/Guk1/Abcc5/Slc28a3/Slc29a1/Gsta1/Gsta2
REACTOME_SYNTHESIS_OF_BILE_ACIDS_AND_BILE_SALTS_VIA_7ALPHA_HYDROXYCHOLESTEROL	REACTOME_SYNTHESIS_OF_BILE_ACIDS_AND_BILE_SALTS_VIA_7ALPHA_HYDROXYCHOLESTEROL	19	-0.279354	-0.737528	0.823699	1	0.888073	3456	tags=32%	list=20%	signal=25%	Acot8/Baat/Slc27a2/Abcb11/Slc27a5/Acox2
REACTOME_ANTIVIRAL_MECHANISM_BY_IFN_STIMULATED_GENES	REACTOME_ANTIVIRAL_MECHANISM_BY_IFN_STIMULATED_GENES	90	-0.209136	-0.737662	0.909646	1	0.888073	6465	tags=50%	list=36%	signal=32%	Faap20/Abce1/Adar/Ppm1b/Ube2n/Nck1/Stat3/Cdk1/Dhx9/Fancm/Ikbkb/Uba7/Eif4a2/Tuba1a/Faap24/Ptpn2/Ube2e1/Ppp2r1b/Eif4a3/Plcg1/Fancf/Ube2l6/Npm1/Sphk1/Eif2ak2/Tubb3/Cenpx/Fance/Irf3/Fanca/Tuba1b/Trp53/Ilf3/Hspa1l/Fancg/Cenps/Ilf2/Tubb1/Dus2/Fancl/Tubb2b/Mapt/Map2k6/Isg15/Tuba8
REACTOME_REGULATION_OF_TNFR1_SIGNALING	REACTOME_REGULATION_OF_TNFR1_SIGNALING	46	-0.232546	-0.738299	0.884768	1	0.888073	3366	tags=15%	list=19%	signal=12%	Spata2/Tnfaip3/Ube2d1/Birc3/Rps27a/Traf1/Tnf
REACTOME_DOWNSTREAM_SIGNALING_OF_ACTIVATED_FGFR3	REACTOME_DOWNSTREAM_SIGNALING_OF_ACTIVATED_FGFR3	21	-0.270696	-0.738499	0.835196	1	0.888073	6191	tags=33%	list=35%	signal=22%	Fgfr3/Grb2/Plcg1/Fgf2/Fgf16/Fgf17/Fgf23
REACTOME_STRIATED_MUSCLE_CONTRACTION	REACTOME_STRIATED_MUSCLE_CONTRACTION	31	-0.248184	-0.739981	0.857339	1	0.888073	3667	tags=26%	list=21%	signal=21%	Neb/Actn2/Tnnc1/Tmod1/Tnni3/Tmod2/Myl4/Mybpc2
REACTOME_ERK_MAPK_TARGETS	REACTOME_ERK_MAPK_TARGETS	19	-0.28029	-0.739998	0.822254	1	0.888073	6119	tags=32%	list=35%	signal=21%	Ppp2r1b/Vrk3/Mapk1/Dusp7/Rps6ka5/Mapk11
REACTOME_SEALING_OF_THE_NUCLEAR_ENVELOPE_NE_BY_ESCRT_III	REACTOME_SEALING_OF_THE_NUCLEAR_ENVELOPE_NE_BY_ESCRT_III	26	-0.257623	-0.742101	0.824897	1	0.888073	5280	tags=27%	list=30%	signal=19%	Chmp2a/Tubb3/Tuba1b/Cc2d1b/Tubb1/Tubb2b/Tuba8
REACTOME_RET_SIGNALING	REACTOME_RET_SIGNALING	38	-0.242638	-0.743134	0.870041	1	0.888073	3492	tags=21%	list=20%	signal=17%	Dok2/Dok5/Gfra1/Dok1/Gfra3/Gfra2/Pik3cd/Ret
REACTOME_PROGRAMMED_CELL_DEATH	REACTOME_PROGRAMMED_CELL_DEATH	132	-0.199863	-0.743373	0.942857	1	0.888073	5766	tags=29%	list=33%	signal=20%	Hmgb1/Fasl/Dffa/Apip/Mapk1/Stub1/Ogt/Chmp2a/Dffb/Traf2/Il18/Hmgb2/Aven/Gzmb/Ticam2/Il1b/Flot2/Bax/Bmf/Diablo/Cd14/Fas/Birc3/Dsg1a/Rps27a/Il1a/Pmaip1/Ppp3cc/Tnfsf10/Gsdmd/Mapt/Stk26/Satb1/Prkcq/Clspn/Casp4/Dcc/Bcl2
REACTOME_PYROPTOSIS	REACTOME_PYROPTOSIS	20	-0.276993	-0.743593	0.829096	1	0.888073	5766	tags=75%	list=33%	signal=51%	Chmp4b/Chmp2b/Chmp7/Gsdme/Casp1/Chmp6/Hmgb1/Chmp2a/Il18/Gzmb/Il1b/Bax/Il1a/Gsdmd/Casp4
REACTOME_CYCLIN_A_B1_B2_ASSOCIATED_EVENTS_DURING_G2_M_TRANSITION	REACTOME_CYCLIN_A_B1_B2_ASSOCIATED_EVENTS_DURING_G2_M_TRANSITION	25	-0.262676	-0.745669	0.831259	1	0.888073	7913	tags=56%	list=45%	signal=31%	Xpo1/Cdk1/Cdk7/Cdc25c/Foxm1/Pkmyt1/Ppp2r1b/Cdk2/Ccna1/Ppp2r3d/Mnat1/Ccnh/Cdc25b/Lcmt1
REACTOME_ENERGY_DEPENDENT_REGULATION_OF_MTOR_BY_LKB1_AMPK	REACTOME_ENERGY_DEPENDENT_REGULATION_OF_MTOR_BY_LKB1_AMPK	29	-0.256467	-0.753764	0.838215	1	0.888073	8003	tags=48%	list=45%	signal=27%	Cab39l/Rheb/Lamtor5/Mlst8/Prkag2/Lamtor1/Prkag1/Slc38a9/Lamtor2/Prkag3/Stk11/Strada/Lamtor4/Rragb
REACTOME_REGULATED_NECROSIS	REACTOME_REGULATED_NECROSIS	51	-0.232948	-0.754791	0.861219	1	0.888073	5766	tags=35%	list=33%	signal=24%	Hmgb1/Fasl/Stub1/Ogt/Chmp2a/Traf2/Il18/Gzmb/Il1b/Flot2/Bax/Fas/Birc3/Rps27a/Il1a/Tnfsf10/Gsdmd/Casp4
REACTOME_ASPIRIN_ADME	REACTOME_ASPIRIN_ADME	40	-0.243406	-0.755136	0.84926	1	0.888073	306	tags=32%	list=2%	signal=32%	Ugt1a1/Ugt1a9/Ugt2a3/Ugt2b5/Acsm5/Cyp3a57/Ugt2b1/Abcc3/Glyatl3/Ugt1a5/Ugt2a1/Ugt1a6a/Ugt1a8
REACTOME_CELL_CELL_COMMUNICATION	REACTOME_CELL_CELL_COMMUNICATION	90	-0.214175	-0.755436	0.896215	1	0.888073	2010	tags=20%	list=11%	signal=18%	Cdh24/Adam19/Kirrel2/Cdh4/Ilf3/Pard6a/Sirpa/Megf6/Col17a1/Fyn/Nphs1/Nectin4/Arhgef6/Cdh9/Krt14/Angptl4/Sirpb1a/Sirpb1c
REACTOME_BETA_CATENIN_INDEPENDENT_WNT_SIGNALING	REACTOME_BETA_CATENIN_INDEPENDENT_WNT_SIGNALING	123	-0.204752	-0.755534	0.921569	1	0.888073	2646	tags=13%	list=15%	signal=11%	Wnt1/Gngt2/Gng10/Pard6a/Wnt5b/Rps27a/Nfatc1/Rac2/Dvl2/Gng2/Gng11/Camk2a/Psme2b/Prkcb/Arrb2/Gnat2
REACTOME_OXIDATIVE_STRESS_INDUCED_SENESCENCE	REACTOME_OXIDATIVE_STRESS_INDUCED_SENESCENCE	37	-0.248087	-0.755745	0.851444	1	0.888073	7667	tags=43%	list=43%	signal=25%	Cdk6/Mdm4/Txn1/Map2k7/Ezh2/Uba52/Rbbp7/Mapk1/Cdk4/Map3k5/Rbbp4/Trp53/Rps27a/Mapk11/Map2k6/Mapk10
REACTOME_DOWNREGULATION_OF_SMAD2_3_SMAD4_TRANSCRIPTIONAL_ACTIVITY	REACTOME_DOWNREGULATION_OF_SMAD2_3_SMAD4_TRANSCRIPTIONAL_ACTIVITY	22	-0.275082	-0.755954	0.805866	1	0.888073	5609	tags=32%	list=32%	signal=22%	Uba52/Mapk1/Tgif2/Smad4/Ube2d1/Rps27a/Parp1
REACTOME_METABOLISM_OF_NUCLEOTIDES	REACTOME_METABOLISM_OF_NUCLEOTIDES	90	-0.215248	-0.759222	0.893773	1	0.888073	8268	tags=54%	list=47%	signal=29%	Nt5c/Gmpr2/Adprm/Nudt16/Dctd/Entpd2/Entpd3/Uck2/Pfas/Rrm2/Adal/Glrx/Nme2/Txn1/Nudt15/Nudt13/Nudt9/Nme1/Dhodh/Paics/Dtymk/Nt5m/Samhd1/Entpd6/Impdh2/Gmps/Ak1/Tk1/Ctps2/Rrm1/Atic/Cad/Entpd4b/Guk1/Gart/Dut/Dck/Ppat/Ak8/Ampd2/Aprt/Pnp/Nudt1/Dnph1/Nudt18/Nme3/Tk2/Ak7/Pnp2
REACTOME_FCERI_MEDIATED_NF_KB_ACTIVATION	REACTOME_FCERI_MEDIATED_NF_KB_ACTIVATION	75	-0.220572	-0.761161	0.861009	1	0.888073	8225	tags=56%	list=46%	signal=30%	Psmd9/Psmb4/Psma2/Psmf1/Psmc3/Bcl10/Ube2n/Nfkb1/Psmd5/Psmc1/Cdc34/Ube2d2a/Psme1/Ikbkb/Tab3/Psmd13/Psmb10/Psma4/Rela/Uba52/Tab1/Psmb1/Psma8/Psmc4/Psmd4/Psmb5/Psma6/Psmc5/Psmb6/Psmd10/Psme2/Psmb8/Fcer1g/Lyn/Skp1/Ube2d1/Rps27a/Malt1/Nfkbia/Psme2b/Prkcq/Card11
REACTOME_TP53_REGULATES_TRANSCRIPTION_OF_CELL_DEATH_GENES	REACTOME_TP53_REGULATES_TRANSCRIPTION_OF_CELL_DEATH_GENES	15	-0.309374	-0.763529	0.805766	1	0.888073	7017	tags=47%	list=40%	signal=28%	Prelid1/Rabggta/Cradd/Pidd1/Tmem219/Atm/Zfp420
REACTOME_FRS_MEDIATED_FGFR3_SIGNALING	REACTOME_FRS_MEDIATED_FGFR3_SIGNALING	16	-0.303743	-0.764664	0.811659	1	0.888073	6191	tags=38%	list=35%	signal=24%	Fgfr3/Grb2/Fgf2/Fgf16/Fgf17/Fgf23
REACTOME_TNF_SIGNALING	REACTOME_TNF_SIGNALING	55	-0.232489	-0.765309	0.849227	1	0.888073	3366	tags=15%	list=19%	signal=12%	Spata2/Tnfaip3/Ube2d1/Birc3/Rps27a/Traf1/Nsmaf/Tnf
REACTOME_UCH_PROTEINASES	REACTOME_UCH_PROTEINASES	95	-0.215505	-0.768826	0.893462	1	0.888073	8225	tags=53%	list=46%	signal=28%	Psmd9/Psmb4/Psma2/Psmf1/Psmc3/H2ac18/H2ac12/Psmd5/Tfpt/Actl6a/Psmc1/Ino80c/Psme1/Ruvbl1/Bap1/Ino80e/Psmd13/Psmb10/H2aj/Psma4/Uba52/Hcfc1/Asxl1/Psmb1/Psma8/Psmc4/Psmd4/Uchl5/Mcrs1/Psmb5/Psma6/Psmc5/Ogt/Psmb6/H2ac15/Psmd10/Nedd8/H2ac13/Psme2/Psmb8/Uchl3/Senp8/Ino80b/Rps27a/Bard1/Uchl1/Psme2b/H2ac7/H2ac23/H2ac6
REACTOME_INTERLEUKIN_6_FAMILY_SIGNALING	REACTOME_INTERLEUKIN_6_FAMILY_SIGNALING	21	-0.282068	-0.769525	0.796089	1	0.888073	2068	tags=38%	list=12%	signal=34%	Il11ra1/Stat3/Il6st/Lif/Cntfr/Ctf1/Socs3/Clcf1
REACTOME_RHO_GTPASE_CYCLE	REACTOME_RHO_GTPASE_CYCLE	415	-0.190135	-0.769614	0.968238	1	0.888073	2533	tags=13%	list=14%	signal=11%	Arhgap39/Ccdc115/Muc13/Pard6a/Arhgap22/Ncf2/Zap70/Ncf4/Arhgap44/Ncf1/Fgd1/Rac2/Rhobtb1/Myo9a/Noxo1/Whamm/Arhgap30/Stmn2/Vrk2/Rnd1/Arhgap4/Ubxn11/Rhoh/Ccp110/Cybb/Def6/Lck/Dock2/Cep97/Dock11/Arhgap15/Arhgap8/Nckap1l/Cyba/Arhgef6/Srgap3/Fmnl1/Arhgdib/Sh3bp1/Arhgap9/Fgd3/Fmnl3/Sema4f/Cyfip2/Swap70/Arhgap25/Stom/Nhs/Dock10/Arhgap45/Arhgdig/Wdr6/Zfp512b
REACTOME_PI_3K_CASCADE_FGFR3	REACTOME_PI_3K_CASCADE_FGFR3	15	-0.313511	-0.773739	0.793627	1	0.888073	6191	tags=40%	list=35%	signal=26%	Fgfr3/Grb2/Fgf2/Fgf16/Fgf17/Fgf23
REACTOME_DOWNREGULATION_OF_TGF_BETA_RECEPTOR_SIGNALING	REACTOME_DOWNREGULATION_OF_TGF_BETA_RECEPTOR_SIGNALING	16	-0.310578	-0.781871	0.781764	1	0.888073	2076	tags=19%	list=12%	signal=17%	Rps27a/Tgfb1/Bambi
REACTOME_DEATH_RECEPTOR_SIGNALING	REACTOME_DEATH_RECEPTOR_SIGNALING	137	-0.209909	-0.782775	0.887872	1	0.888073	3366	tags=15%	list=19%	signal=12%	Spata2/Tnfaip3/Prex1/Fas/Itgb3bp/Ube2d1/Birc3/Rps27a/Fgd1/Ripk2/Tnfsf10/Nfkbia/Traf1/Ngfr/Nsmaf/Arhgef6/Omg/Fgd3/Arhgef33/Tnf
REACTOME_L1CAM_INTERACTIONS	REACTOME_L1CAM_INTERACTIONS	67	-0.229945	-0.782811	0.844913	1	0.888073	2099	tags=13%	list=12%	signal=12%	Tubb1/Sptbn4/Msn/Gap43/Tubb2b/Sptb/Nfasc/Sptbn2/Tuba8
REACTOME_TRAF6_MEDIATED_INDUCTION_OF_TAK1_COMPLEX_WITHIN_TLR4_COMPLEX	REACTOME_TRAF6_MEDIATED_INDUCTION_OF_TAK1_COMPLEX_WITHIN_TLR4_COMPLEX	16	-0.311893	-0.78518	0.778774	1	0.888073	4155	tags=62%	list=23%	signal=48%	Ubb/Ticam1/Irak2/Tab3/Uba52/Tab1/Ticam2/Cd14/Rps27a/Sarm1
REACTOME_ANTIGEN_PRESENTATION_FOLDING_ASSEMBLY_AND_PEPTIDE_LOADING_OF_CLASS_I_MHC	REACTOME_ANTIGEN_PRESENTATION_FOLDING_ASSEMBLY_AND_PEPTIDE_LOADING_OF_CLASS_I_MHC	33	-0.26101	-0.787242	0.789835	1	0.888073	4234	tags=27%	list=24%	signal=21%	H2-Q4/Tap2/H2-T22/H2-M2/Tap1/H2-Q7/Tapbp/H2-M3/H2-Q6
REACTOME_REGULATION_OF_PTEN_GENE_TRANSCRIPTION	REACTOME_REGULATION_OF_PTEN_GENE_TRANSCRIPTION	27	-0.272056	-0.787514	0.782247	1	0.888073	7958	tags=59%	list=45%	signal=33%	Rheb/Maf1/Lamtor5/Mlst8/Mta2/Lamtor1/Rbbp7/Gatad2a/Mta1/Slc38a9/Lamtor2/Chd4/Rbbp4/Mbd3/Lamtor4/Rragb
REACTOME_VASOPRESSIN_REGULATES_RENAL_WATER_HOMEOSTASIS_VIA_AQUAPORINS	REACTOME_VASOPRESSIN_REGULATES_RENAL_WATER_HOMEOSTASIS_VIA_AQUAPORINS	29	-0.268526	-0.789206	0.788006	1	0.888073	2630	tags=21%	list=15%	signal=18%	Gngt2/Gng10/Gng2/Aqp4/Gng11/Prkar1b
REACTOME_TRANSFERRIN_ENDOCYTOSIS_AND_RECYCLING	REACTOME_TRANSFERRIN_ENDOCYTOSIS_AND_RECYCLING	28	-0.270113	-0.790328	0.789106	1	0.888073	1198	tags=11%	list=7%	signal=10%	Atp6v0d2/Atp6v1g2/Tfr2
REACTOME_SLC_MEDIATED_TRANSMEMBRANE_TRANSPORT	REACTOME_SLC_MEDIATED_TRANSMEMBRANE_TRANSPORT	219	-0.203198	-0.790493	0.91766	1	0.888073	3136	tags=16%	list=18%	signal=14%	Slc7a11/Slc22a12/Slc50a1/Slc25a18/Slc1a6/Slc38a5/Rhcg/Slco1a4/Slc15a2/Slc25a26/Slc41a1/Slc17a1/Slc9a4/Apod/Slc39a6/Slc20a2/Slc9a9/Slc26a1/Slc7a6/Slc2a6/Slc16a7/Slc15a3/Slc22a3/Slc36a2/Slc1a2/Slc44a2/Slc43a1/Slc27a6/Slc6a15/Slc9a7/Slc5a7/Slc17a6/Slc24a2/Slc2a3/Slc17a7/Slco1b2
REACTOME_CASPASE_ACTIVATION_VIA_DEATH_RECEPTORS_IN_THE_PRESENCE_OF_LIGAND	REACTOME_CASPASE_ACTIVATION_VIA_DEATH_RECEPTORS_IN_THE_PRESENCE_OF_LIGAND	15	-0.320398	-0.790737	0.7739	1	0.888073	5751	tags=60%	list=32%	signal=41%	Ticam1/Casp8/Tradd/Fasl/Traf2/Ticam2/Cd14/Fas/Tnfsf10
REACTOME_PTEN_REGULATION	REACTOME_PTEN_REGULATION	96	-0.221389	-0.790799	0.860409	1	0.888073	8225	tags=50%	list=46%	signal=27%	Psmd9/Psmb4/Psma2/Psmf1/Psmc3/Rheb/Maf1/Akt2/Psmd5/Lamtor5/Psmc1/Mlst8/Csnk2b/Psme1/Mta2/Lamtor1/Psmd13/Psmb10/Psma4/Uba52/Psmb1/Psma8/Rbbp7/Psmc4/Psmd4/Gatad2a/Psmb5/Mta1/Psma6/Stub1/Wwp2/Slc38a9/Psmc5/Psmb6/Pml/Akt3/Psmd10/Psme2/Lamtor2/Psmb8/Chd4/Rbbp4/Mbd3/Trim27/Rps27a/Lamtor4/Psme2b/Rragb
REACTOME_TNFR1_INDUCED_NF_KAPPA_B_SIGNALING_PATHWAY	REACTOME_TNFR1_INDUCED_NF_KAPPA_B_SIGNALING_PATHWAY	32	-0.262486	-0.791204	0.788331	1	0.888073	3366	tags=19%	list=19%	signal=15%	Spata2/Tnfaip3/Birc3/Rps27a/Traf1/Tnf
REACTOME_N_GLYCAN_TRIMMING_IN_THE_ER_AND_CALNEXIN_CALRETICULIN_CYCLE	REACTOME_N_GLYCAN_TRIMMING_IN_THE_ER_AND_CALNEXIN_CALRETICULIN_CYCLE	15	-0.321385	-0.793173	0.7739	1	0.888073	8347	tags=60%	list=47%	signal=32%	Ubb/Derl1/Psmc1/Canx/Uba52/Amfr/Ubxn1/Rps27a/Engase
REACTOME_PROTEIN_LOCALIZATION	REACTOME_PROTEIN_LOCALIZATION	100	-0.222467	-0.795401	0.849398	1	0.888073	5950	tags=49%	list=34%	signal=33%	Crot/Pex26/Ube2d2a/Stx5a/Pex6/Pex1/Ube2j2/Emd/Pex14/Mpv17/Pecr/Scp2/Ephx2/Uba52/Cyb5a/Pex3/Amacr/Pex10/Pxmp4/Serp1/Ech1/Pitrm1/Vamp2/Sec61g/Coq2/Sec61b/Fis1/Acot2/Pipox/Acot8/Pex16/Fxn/Agxt/Hmgcl/Pex11b/Tysnd1/Baat/Dhrs4/Slc27a2/Ube2d1/Gdap1/Cat/Rps27a/Dao/Acot1/Acox2/Ddo/Nos2/Hao2
REACTOME_PHASE_II_CONJUGATION_OF_COMPOUNDS	REACTOME_PHASE_II_CONJUGATION_OF_COMPOUNDS	89	-0.226653	-0.798769	0.84127	1	0.888073	5398	tags=30%	list=30%	signal=21%	Ugt1a1/Gstm5/Ugt1a9/Gstz1/Slc35b3/Ugt2a3/Ugt2b5/Mgst2/Acsm5/Trmt112/Ugt2b1/Ggct/Podxl2/Mtr/Gstt1/Glyatl3/Mtrr/Gstt2/Gsta1/Mgst1/Ugt1a5/Slc26a1/Sult4a1/Gsta2/Ugt2a1/Ugt1a6a/Ugt1a8
REACTOME_HEPARAN_SULFATE_HEPARIN_HS_GAG_METABOLISM	REACTOME_HEPARAN_SULFATE_HEPARIN_HS_GAG_METABOLISM	51	-0.246535	-0.798813	0.802853	1	0.888073	663	tags=14%	list=4%	signal=13%	Hs3st5/Hpse/Glb1l/Hs6st2/Ndst4/Hs3st2/Xylt1
REACTOME_GAB1_SIGNALOSOME	REACTOME_GAB1_SIGNALOSOME	17	-0.311388	-0.80021	0.735766	1	0.888073	51	tags=29%	list=0%	signal=29%	Grb2/Areg/Pag1/Csk/Egf
REACTOME_IRS_MEDIATED_SIGNALLING	REACTOME_IRS_MEDIATED_SIGNALLING	35	-0.264814	-0.800437	0.790123	1	0.888073	3346	tags=23%	list=19%	signal=19%	Fgf22/Kl/Fgf16/Fgf17/Fgf23/Fgfr4/Flt3l/Tlr9
REACTOME_SIGNALING_BY_TYPE_1_INSULIN_LIKE_GROWTH_FACTOR_1_RECEPTOR_IGF1R	REACTOME_SIGNALING_BY_TYPE_1_INSULIN_LIKE_GROWTH_FACTOR_1_RECEPTOR_IGF1R	41	-0.257554	-0.801384	0.802685	1	0.888073	3346	tags=22%	list=19%	signal=18%	Fgf22/Kl/Fgf16/Fgf17/Fgf23/Fgfr4/Cilp/Flt3l/Tlr9
REACTOME_SUMOYLATION_OF_TRANSCRIPTION_COFACTORS	REACTOME_SUMOYLATION_OF_TRANSCRIPTION_COFACTORS	38	-0.261836	-0.801931	0.779754	1	0.888073	7643	tags=50%	list=43%	signal=28%	Phc1/Phc2/Pias4/Sumo1/Ring1/Sumo3/Bmi1/Park7/Phc3/Sumo2/Cbx8/Rnf2/Npm1/Ctbp1/Pcgf2/Pias3/Cbx4/Ing2/Cbx2
REACTOME_SIGNALING_BY_SCF_KIT	REACTOME_SIGNALING_BY_SCF_KIT	36	-0.265162	-0.80251	0.789182	1	0.888073	4059	tags=25%	list=23%	signal=19%	Chek1/Stat5b/Lyn/Sh2b3/Fyn/Grap/Lck/Grap2/Stat5a
REACTOME_METABOLISM_OF_AMINE_DERIVED_HORMONES	REACTOME_METABOLISM_OF_AMINE_DERIVED_HORMONES	15	-0.325253	-0.802719	0.764795	1	0.888073	3734	tags=40%	list=21%	signal=32%	Ddc/Dio3/Dio1/Duox1/Tshb/Aanat
REACTOME_SYNTHESIS_OF_GLYCOSYLPHOSPHATIDYLINOSITOL_GPI	REACTOME_SYNTHESIS_OF_GLYCOSYLPHOSPHATIDYLINOSITOL_GPI	17	-0.312543	-0.803178	0.732847	1	0.888073	8146	tags=53%	list=46%	signal=29%	Pign/Pigh/Pigp/Pigyl/Pigl/Pigb/Dpm2/Pigm/Pigz
REACTOME_PCP_CE_PATHWAY	REACTOME_PCP_CE_PATHWAY	85	-0.229281	-0.803982	0.816748	1	0.888073	8525	tags=49%	list=48%	signal=26%	Psma7/Prickle1/Ubb/Psmd9/Psmb4/Psma2/Psmf1/Psmc3/Psmd5/Psmc1/Clta/Psme1/Ap2a2/Pfn1/Cltb/Psmd13/Psmb10/Psma4/Uba52/Psmb1/Psma8/Psmc4/Psmd4/Dvl1/Psmb5/Psma6/Psmc5/Psmb6/Ap2s1/Psmd10/Psme2/Psmb8/Wnt11/Wnt1/Pard6a/Wnt5b/Rps27a/Rac2/Dvl2/Psme2b/Prkcb/Arrb2
REACTOME_AGGREPHAGY	REACTOME_AGGREPHAGY	34	-0.26647	-0.805669	0.768493	1	0.888073	2099	tags=15%	list=12%	signal=13%	Tubb1/Rps27a/Hdac6/Tubb2b/Tuba8
REACTOME_G_PROTEIN_ACTIVATION	REACTOME_G_PROTEIN_ACTIVATION	24	-0.286581	-0.806717	0.759722	1	0.888073	2630	tags=25%	list=15%	signal=21%	Gngt2/Gng10/Gna15/Pomc/Gng2/Gng11
REACTOME_ACTIVATION_OF_NMDA_RECEPTORS_AND_POSTSYNAPTIC_EVENTS	REACTOME_ACTIVATION_OF_NMDA_RECEPTORS_AND_POSTSYNAPTIC_EVENTS	35	-0.267136	-0.807457	0.781893	1	0.888073	1808	tags=14%	list=10%	signal=13%	Rps6ka6/Grin3a/Camk2a/Dlg2/Prkar1b
REACTOME_FRS_MEDIATED_FGFR4_SIGNALING	REACTOME_FRS_MEDIATED_FGFR4_SIGNALING	18	-0.311115	-0.810158	0.748191	1	0.888073	2829	tags=22%	list=16%	signal=19%	Fgf16/Fgf17/Fgf23/Fgfr4
REACTOME_PI_3K_CASCADE_FGFR4	REACTOME_PI_3K_CASCADE_FGFR4	17	-0.315998	-0.812057	0.727007	1	0.888073	2829	tags=24%	list=16%	signal=20%	Fgf16/Fgf17/Fgf23/Fgfr4
REACTOME_MITF_M_REGULATED_MELANOCYTE_DEVELOPMENT	REACTOME_MITF_M_REGULATED_MELANOCYTE_DEVELOPMENT	31	-0.272761	-0.81326	0.762689	1	0.888073	571	tags=10%	list=3%	signal=9%	Myo5a/Tcf7/Mitf
REACTOME_TRANS_GOLGI_NETWORK_VESICLE_BUDDING	REACTOME_TRANS_GOLGI_NETWORK_VESICLE_BUDDING	70	-0.238438	-0.813302	0.805	1	0.888073	5909	tags=29%	list=33%	signal=19%	Dtnbp1/Snx2/Ap1s2/M6pr/Tpd52l1/Vamp2/Napa/Chmp2a/Hip1r/Snx5/Pik3c2a/Txndc5/Ctsz/Vamp8/Ap1s3/Ap4s1/Ocrl/Bloc1s4/Dnase2a/Dnajc6
REACTOME_TNFR1_INDUCED_PROAPOPTOTIC_SIGNALING	REACTOME_TNFR1_INDUCED_PROAPOPTOTIC_SIGNALING	22	-0.297811	-0.818414	0.73324	1	0.888073	3366	tags=18%	list=19%	signal=15%	Spata2/Tnfaip3/Birc3/Tnf
REACTOME_TRANSPORT_OF_CONNEXONS_TO_THE_PLASMA_MEMBRANE	REACTOME_TRANSPORT_OF_CONNEXONS_TO_THE_PLASMA_MEMBRANE	17	-0.321786	-0.826931	0.706569	1	0.888073	2099	tags=41%	list=12%	signal=36%	Tuba1a/Gjb2/Tubb3/Tuba1b/Tubb1/Tubb2b/Tuba8
REACTOME_DEGRADATION_OF_AXIN	REACTOME_DEGRADATION_OF_AXIN	53	-0.25338	-0.828508	0.752577	1	0.888073	9429	tags=62%	list=53%	signal=29%	Psmb3/Psmb7/Axin1/Psma1/Psmd7/Tnks2/Psma7/Ubb/Psmd9/Psmb4/Psma2/Psmf1/Psmc3/Psmd5/Psmc1/Psme1/Psmd13/Psmb10/Psma4/Uba52/Psmb1/Psma8/Psmc4/Psmd4/Psmb5/Psma6/Psmc5/Psmb6/Psmd10/Psme2/Psmb8/Rps27a/Psme2b
REACTOME_SIGNALING_BY_ERBB2	REACTOME_SIGNALING_BY_ERBB2	44	-0.262718	-0.830537	0.753623	1	0.888073	494	tags=11%	list=3%	signal=11%	Rps27a/Fyn/Nrg3/Ptk6/Egf
REACTOME_IKK_COMPLEX_RECRUITMENT_MEDIATED_BY_RIP1	REACTOME_IKK_COMPLEX_RECRUITMENT_MEDIATED_BY_RIP1	23	-0.30007	-0.83249	0.71308	1	0.888073	4155	tags=26%	list=23%	signal=20%	Ticam2/Cd14/Ube2d1/Birc3/Rps27a/Sarm1
REACTOME_DETOXIFICATION_OF_REACTIVE_OXYGEN_SPECIES	REACTOME_DETOXIFICATION_OF_REACTIVE_OXYGEN_SPECIES	34	-0.275473	-0.832891	0.730137	1	0.888073	2981	tags=26%	list=17%	signal=22%	Gpx5/Gpx6/Cat/Nox4/Ncf2/Ncf4/Ncf1/Cybb/Cyba
REACTOME_AMINO_ACID_TRANSPORT_ACROSS_THE_PLASMA_MEMBRANE	REACTOME_AMINO_ACID_TRANSPORT_ACROSS_THE_PLASMA_MEMBRANE	32	-0.276976	-0.834879	0.727273	1	0.888073	4092	tags=25%	list=23%	signal=19%	Slc7a5/Slc38a1/Slc7a11/Slc38a5/Slc7a6/Slc36a2/Slc43a1/Slc6a15
REACTOME_SHC_MEDIATED_CASCADE_FGFR4	REACTOME_SHC_MEDIATED_CASCADE_FGFR4	16	-0.331746	-0.835159	0.693572	0.995476	0.884055	2829	tags=25%	list=16%	signal=21%	Fgf16/Fgf17/Fgf23/Fgfr4
REACTOME_PROTEIN_METHYLATION	REACTOME_PROTEIN_METHYLATION	19	-0.316468	-0.835513	0.692197	0.995476	0.884055	8246	tags=63%	list=47%	signal=34%	Eef2/Calm1/Mettl21a/Calm3/Eef1akmt2/Kin/Rps2/Eef1a1/Etfb/Vcpkmt/Prmt3/Eef2kmt
REACTOME_PKMTS_METHYLATE_HISTONE_LYSINES	REACTOME_PKMTS_METHYLATE_HISTONE_LYSINES	64	-0.249152	-0.836537	0.767766	1	0.888073	4504	tags=31%	list=25%	signal=23%	Ehmt2/Nsd2/Wdr5/H3c10/H4c9/Rbbp4/Suv39h1/H3c4/H3c8/H4c12/H3c13/Ash2l/H4c6/H3c3/Smyd3/Setdb2/Nfkb2/H3c6/H3c14/H4c18
REACTOME_COPII_MEDIATED_VESICLE_TRANSPORT	REACTOME_COPII_MEDIATED_VESICLE_TRANSPORT	70	-0.245284	-0.836652	0.7675	1	0.888073	7420	tags=37%	list=42%	signal=22%	Sec22c/Sec22b/Tmed2/Stx5a/Gosr2/Lman2l/Napg/Folr1/Lman1l/Areg/Ppp6c/Trappc2l/Tfg/Napa/Trappc3/Gorasp1/Col7a1/Bet1/Ctsz/Preb/Trappc4/Napb/F5/Serpina1c/Cnih2/Serpina1b
REACTOME_INTERFERON_GAMMA_SIGNALING	REACTOME_INTERFERON_GAMMA_SIGNALING	19	-0.317655	-0.838646	0.687861	0.995476	0.884055	6763	tags=47%	list=38%	signal=29%	Sumo1/Ybx1/Ptpn2/Mapk1/Ptpn6/Socs1/Socs3/Camk2a/Ifng
REACTOME_GPVI_MEDIATED_ACTIVATION_CASCADE	REACTOME_GPVI_MEDIATED_ACTIVATION_CASCADE	34	-0.278211	-0.841169	0.713699	1	0.888073	3987	tags=29%	list=22%	signal=23%	Syk/Fcer1g/Lcp2/Lyn/Rhog/Rac2/Fyn/Lck/Lat/Gp6
REACTOME_IL_6_TYPE_CYTOKINE_RECEPTOR_LIGAND_INTERACTIONS	REACTOME_IL_6_TYPE_CYTOKINE_RECEPTOR_LIGAND_INTERACTIONS	15	-0.340969	-0.841505	0.691958	0.995476	0.884055	132	tags=40%	list=1%	signal=40%	Il11ra1/Il6st/Lif/Cntfr/Ctf1/Clcf1
REACTOME_SYNTHESIS_OF_BILE_ACIDS_AND_BILE_SALTS	REACTOME_SYNTHESIS_OF_BILE_ACIDS_AND_BILE_SALTS	29	-0.288075	-0.846658	0.709902	1	0.888073	6321	tags=41%	list=36%	signal=27%	Scp2/Osbpl7/Amacr/Cyp39a1/Acot8/Ch25h/Baat/Slc27a2/Abcb11/Slc27a5/Acox2/Cyp46a1
REACTOME_TERMINATION_OF_O_GLYCAN_BIOSYNTHESIS	REACTOME_TERMINATION_OF_O_GLYCAN_BIOSYNTHESIS	16	-0.337346	-0.849259	0.678625	0.994159	0.882885	2553	tags=38%	list=14%	signal=32%	St6galnac2/Muc1/Muc20/Muc13/St6galnac3/St6gal1
REACTOME_FRS_MEDIATED_FGFR1_SIGNALING	REACTOME_FRS_MEDIATED_FGFR1_SIGNALING	17	-0.331753	-0.852545	0.671533	0.993817	0.882582	3346	tags=35%	list=19%	signal=29%	Grb2/Fgf2/Fgf22/Kl/Fgf17/Fgf23
REACTOME_PI_3K_CASCADE_FGFR1	REACTOME_PI_3K_CASCADE_FGFR1	16	-0.338918	-0.853216	0.675635	0.994159	0.882885	3346	tags=38%	list=19%	signal=30%	Grb2/Fgf2/Fgf22/Kl/Fgf17/Fgf23
REACTOME_PLATELET_SENSITIZATION_BY_LDL	REACTOME_PLATELET_SENSITIZATION_BY_LDL	17	-0.332289	-0.853923	0.671533	0.993817	0.882582	1502	tags=35%	list=8%	signal=32%	Ppp2r5d/Ppp2r1b/Ppp2r5c/Ptpn6/Lrp8/Fgr
REACTOME_DRUG_ADME	REACTOME_DRUG_ADME	95	-0.239864	-0.855729	0.736077	1	0.888073	4910	tags=29%	list=28%	signal=21%	Slc22a1/Guk1/Ugt2a3/Abcc5/Ugt2b5/Acsm5/Cyp3a57/Slc28a3/Ugt2b1/Adh1/Slc29a3/Slc29a1/Pnp/Abcc3/Abcc1/Gstt1/Glyatl3/Slco1a4/Gsta1/Ugt1a5/Pnp2/Slc22a3/Gsta2/Serpina6/Ugt2a1/Ugt1a6a/Ugt1a8/Slco1b2
REACTOME_TRANSPORT_OF_VITAMINS_NUCLEOSIDES_AND_RELATED_MOLECULES	REACTOME_TRANSPORT_OF_VITAMINS_NUCLEOSIDES_AND_RELATED_MOLECULES	35	-0.28352	-0.856981	0.703704	1	0.888073	5387	tags=37%	list=30%	signal=26%	Slco2a1/Arl2bp/Slc35b3/Slc35b4/Slc27a1/Slc28a3/Slco1c1/Slc29a3/Slc29a1/Slco1a4/Apod/Slc27a6/Slco1b2
REACTOME_CROSS_PRESENTATION_OF_SOLUBLE_EXOGENOUS_ANTIGENS_ENDOSOMES	REACTOME_CROSS_PRESENTATION_OF_SOLUBLE_EXOGENOUS_ANTIGENS_ENDOSOMES	46	-0.269986	-0.857166	0.717881	1	0.888073	8225	tags=50%	list=46%	signal=27%	Psmd9/Psmb4/Psma2/Psmf1/Psmc3/Psmd5/Psmc1/Psme1/Psmd13/Psmb10/Psma4/Psmb1/Psma8/Psmc4/Psmd4/Psmb5/Psma6/Psmc5/Psmb6/Psmd10/Psme2/Psmb8/Psme2b
REACTOME_TGF_BETA_RECEPTOR_SIGNALING_IN_EMT_EPITHELIAL_TO_MESENCHYMAL_TRANSITION	REACTOME_TGF_BETA_RECEPTOR_SIGNALING_IN_EMT_EPITHELIAL_TO_MESENCHYMAL_TRANSITION	15	-0.347505	-0.857635	0.663126	0.992315	0.881248	2408	tags=20%	list=14%	signal=17%	Pard6a/Rps27a/Tgfb1
REACTOME_GLUCAGON_TYPE_LIGAND_RECEPTORS	REACTOME_GLUCAGON_TYPE_LIGAND_RECEPTORS	33	-0.284879	-0.859236	0.68956	0.995476	0.884055	2630	tags=24%	list=15%	signal=21%	Gngt2/Gng10/Glp1r/Gng2/Gcg/Gng11/Sct/Gip
REACTOME_MAPK_FAMILY_SIGNALING_CASCADES	REACTOME_MAPK_FAMILY_SIGNALING_CASCADES	286	-0.217955	-0.86258	0.82241	1	0.888073	2076	tags=12%	list=12%	signal=10%	Rps27a/Gfra3/Rasgrp3/Sptbn4/Mras/Ccnd3/Fyn/Gfra2/Cnksr2/Sptb/Mapk4/Camk2a/Psme2b/Fgfr4/Lat/Fgb/Dlg2/Prkcq/Rgl3/Dusp2/Sptbn2/Apbb1ip/Il2rg/Nrg3/Flt3l/Ptpn7/Arrb2/Ret/Rasal3/Rasgrp1/Rasal1/Il2ra/Egf
REACTOME_FATTY_ACIDS	REACTOME_FATTY_ACIDS	17	-0.336059	-0.863611	0.664234	0.992315	0.881248	2916	tags=29%	list=16%	signal=25%	Cyp4f39/Cyp4a29/Cyp4a12a/Cyp4a14/Cyp4f18
REACTOME_CARBOXYTERMINAL_POST_TRANSLATIONAL_MODIFICATIONS_OF_TUBULIN	REACTOME_CARBOXYTERMINAL_POST_TRANSLATIONAL_MODIFICATIONS_OF_TUBULIN	27	-0.300257	-0.869145	0.678225	0.994159	0.882885	2101	tags=19%	list=12%	signal=16%	Ttll6/Ttll9/Tubb1/Tubb2b/Tuba8
REACTOME_RAC3_GTPASE_CYCLE	REACTOME_RAC3_GTPASE_CYCLE	89	-0.247335	-0.871654	0.713065	1	0.888073	4008	tags=22%	list=23%	signal=17%	Slitrk3/Git2/Ocrl/Lbr/Pgrmc2/Prex1/Arhgap39/Ncf2/Ncf4/Ncf1/Noxo1/Vrk2/Cybb/Arhgap15/Nckap1l/Cyba/Arhgdib/Swap70/Nhs/Dock10
REACTOME_REPRODUCTION	REACTOME_REPRODUCTION	22	-0.317347	-0.872102	0.656425	0.988468	0.877832	3666	tags=36%	list=21%	signal=29%	Catsperd/Fignl1/Ovgp1/Acr/Kcnu1/Catsperg1/Hvcn1/Adam21
REACTOME_TRANSCRIPTIONAL_REGULATION_BY_THE_AP_2_TFAP2_FAMILY_OF_TRANSCRIPTION_FACTORS	REACTOME_TRANSCRIPTIONAL_REGULATION_BY_THE_AP_2_TFAP2_FAMILY_OF_TRANSCRIPTION_FACTORS	18	-0.336206	-0.875497	0.643994	0.980518	0.870771	5528	tags=39%	list=31%	signal=27%	Npm1/Yeats4/Atad2/Myc/Tfap2a/Cited4/Cited1
REACTOME_PROCESSING_OF_INTRONLESS_PRE_MRNAS	REACTOME_PROCESSING_OF_INTRONLESS_PRE_MRNAS	20	-0.326582	-0.876715	0.646893	0.980518	0.870771	9134	tags=60%	list=52%	signal=29%	Ncbp2/Ncbp1/Pcf11/Cstf2t/Cpsf6/Nudt21/Clp1/Cpsf3/Cpsf7/Fip1l1/Cpsf4/Pabpn1
REACTOME_HDMS_DEMETHYLATE_HISTONES	REACTOME_HDMS_DEMETHYLATE_HISTONES	46	-0.276287	-0.87717	0.67947	0.994159	0.882885	4504	tags=28%	list=25%	signal=21%	H3c10/H4c9/H3c4/Arid5b/H3c8/H4c12/H3c13/Uty/H4c6/H3c3/H3c6/H3c14/H4c18
REACTOME_TRANSCRIPTIONAL_REGULATION_BY_TP53	REACTOME_TRANSCRIPTIONAL_REGULATION_BY_TP53	290	-0.221246	-0.878104	0.794118	1	0.888073	7586	tags=45%	list=43%	signal=26%	Lamtor5/E2f8/Nuak1/Cdk1/Ehmt1/Mdm4/Txn1/Mlst8/Ddit4/Csnk2b/Polr2b/Eloc/Mta2/Cdk7/Ywhae/Taf13/Prelid1/Prkag2/Pcna/Polr2f/Cdc25c/Phf20/Ing5/Pin1/Lamtor1/Cnot4/Rfc5/Pip4p1/Taf9/Rad50/Uba52/Elob/Tbp/E2f7/Rbbp7/Nelfcd/Rabggta/Ppp2r1b/Prkag1/Cnot8/Gatad2a/Taf6/Rad17/Brip1/Cradd/Kat5/Brd7/Aurka/Slc38a9/Npm1/Trp53inp1/Pou4f1/Polr2k/Polr2e/Cnot9/Cdk2/Rnf34/Pml/Meaf6/Ehmt2/Rfc2/Ppp2r5c/Supt4a/Cox7a2l/Polr2…
REACTOME_SENSORY_PERCEPTION	REACTOME_SENSORY_PERCEPTION	92	-0.249107	-0.881132	0.695122	0.995476	0.884055	1502	tags=10%	list=8%	signal=9%	Lrp8/Rho/Stra6/Rdh12/Ppef1/Ttr/Rdh1/Rgs9bp/Cnga1
REACTOME_SYNTHESIS_OF_LEUKOTRIENES_LT_AND_EOXINS_EX	REACTOME_SYNTHESIS_OF_LEUKOTRIENES_LT_AND_EOXINS_EX	24	-0.31326	-0.881817	0.648611	0.980518	0.870771	3106	tags=25%	list=18%	signal=21%	Abcc1/Cyp4a29/Cyp4a12a/Cyp4a14/Cyp4f18/Alox15
REACTOME_RAS_PROCESSING	REACTOME_RAS_PROCESSING	23	-0.317873	-0.881882	0.651195	0.982505	0.872536	8512	tags=57%	list=48%	signal=29%	Pde6d/Ubb/Bcl2l1/Calm1/Calm3/Zdhhc9/Fntb/Uba52/Arl2/Fnta/Abhd17a/Rps27a/Prkcq
REACTOME_ESR_MEDIATED_SIGNALING	REACTOME_ESR_MEDIATED_SIGNALING	155	-0.234126	-0.884052	0.723788	1	0.888073	2928	tags=15%	list=17%	signal=12%	Prmt1/H2bc13/H4c6/Gngt2/Polr2d/Polr2g/Polr2h/Gng10/H2bc22/H3c3/S1pr3/Gng2/Mmp3/Gng11/H2bc8/H3c6/H2bc23/H2bc24/H3c14/H4c18/Egf/Cited1/H2bc11
REACTOME_ACYL_CHAIN_REMODELLING_OF_PG	REACTOME_ACYL_CHAIN_REMODELLING_OF_PG	15	-0.358951	-0.885883	0.629742	0.972895	0.864002	2340	tags=60%	list=13%	signal=52%	Pla2g2d/Pla2g12a/Pla2g4b/Pla2g5/Crls1/Lpcat4/Pla2g2e/Pla2g2f/Lpcat1
REACTOME_REGULATION_OF_INSULIN_SECRETION	REACTOME_REGULATION_OF_INSULIN_SECRETION	61	-0.266066	-0.889387	0.666667	0.992315	0.881248	2630	tags=21%	list=15%	signal=18%	Gngt2/Cacna1e/Gng10/Adra2a/Gna15/Glp1r/Gng2/Gcg/Gng11/Cacna1d/Kcnc2/Kcnj11/Rapgef4
REACTOME_METALLOPROTEASE_DUBS	REACTOME_METALLOPROTEASE_DUBS	37	-0.292429	-0.890823	0.647868	0.980518	0.870771	2475	tags=19%	list=14%	signal=16%	Brca1/Rps27a/Bard1/Nlrp3/H2ac7/H2ac23/H2ac6
REACTOME_SHC_MEDIATED_CASCADE_FGFR1	REACTOME_SHC_MEDIATED_CASCADE_FGFR1	15	-0.362363	-0.894305	0.623672	0.968908	0.860461	3346	tags=40%	list=19%	signal=32%	Grb2/Fgf2/Fgf22/Kl/Fgf17/Fgf23
REACTOME_CARGO_CONCENTRATION_IN_THE_ER	REACTOME_CARGO_CONCENTRATION_IN_THE_ER	34	-0.296519	-0.896523	0.624658	0.968908	0.860461	1780	tags=44%	list=10%	signal=40%	Sec22b/Tmed2/Stx5a/Gosr2/Lman2l/Folr1/Lman1l/Areg/Col7a1/Ctsz/Preb/F5/Serpina1c/Cnih2/Serpina1b
REACTOME_NOTCH_HLH_TRANSCRIPTION_PATHWAY	REACTOME_NOTCH_HLH_TRANSCRIPTION_PATHWAY	22	-0.327038	-0.898735	0.614525	0.968908	0.860461	2292	tags=68%	list=13%	signal=59%	Hdac10/Hdac1/Hdac4/Hdac11/Maml1/Notch1/Rbpj/Hdac3/Hdac8/Hdac5/Kat2a/Mamld1/Maml2/Hdac6/Hdac7
REACTOME_SIGNALING_BY_NOTCH3	REACTOME_SIGNALING_BY_NOTCH3	19	-0.341324	-0.901137	0.619942	0.968908	0.860461	3210	tags=21%	list=18%	signal=17%	Jag2/Dll4/Rps27a/Egf
REACTOME_NICOTINATE_METABOLISM	REACTOME_NICOTINATE_METABOLISM	30	-0.305924	-0.90146	0.617852	0.968908	0.860461	1728	tags=30%	list=10%	signal=27%	Nmnat3/Naprt/Parp10/Nadk2/Nampt/Parp8/Nmrk1/Cd38/Qprt
REACTOME_ION_HOMEOSTASIS	REACTOME_ION_HOMEOSTASIS	52	-0.276966	-0.903313	0.644501	0.980518	0.870771	1602	tags=13%	list=9%	signal=12%	Tnni3/Ryr1/Camk2a/Fxyd7/Trdn/Atp2b3/Kcnj11
REACTOME_G_ALPHA_S_SIGNALLING_EVENTS	REACTOME_G_ALPHA_S_SIGNALLING_EVENTS	115	-0.249878	-0.907844	0.667059	0.992315	0.881248	2701	tags=23%	list=15%	signal=20%	Rln3/Taar1/Gngt2/Gng10/Gpbar1/Pde7a/Htr7/Pde1b/Glp1r/Iapp/Pomc/Gng2/Ramp3/Gpr176/Pde4a/Gcg/Gng11/Hrh2/Sct/Adrb2/Gper1/Pth2r/Tshb/Pthlh/Arrb2/Prkar1b/Gip
REACTOME_DEVELOPMENTAL_BIOLOGY	REACTOME_DEVELOPMENTAL_BIOLOGY	390	-0.225531	-0.90982	0.731405	1	0.888073	2931	tags=19%	list=17%	signal=16%	Dpysl3/Col4a3/Cela2a/Dsg1a/Krt32/Krt83/Krt9/Krtap16-1/Gfra1/Sh3kbp1/Ephb3/Dok1/St8sia4/Tcf3/Tubb1/Rps27a/Plxnc1/Gfra3/Krt78/Sptbn4/Ephb6/Rps6ka5/Mef2b/Stx1b/Fyn/Gfra2/Msn/Dscam/Adam22/Gap43/Tubb2b/Cdsn/Rnd1/Ptprc/Cxcl12/Sptb/Pfn2/Mapk11/Cdk5r1/Mef2c/Efnb3/Cxcr4/Sema4d/Evl/Kazn/Cd72/Lgi2/Trem2/Krt14/Prkcq/Dsc3/Pik3cd/Nfasc/Ephb1/Sptbn2/Cacng8/Myo5a/Dcc/Krt31/Tcf7/Epha6/Tuba8/Krtap5-5/Mitf/Ret/Tgm1…
REACTOME_GLI3_IS_PROCESSED_TO_GLI3R_BY_THE_PROTEASOME	REACTOME_GLI3_IS_PROCESSED_TO_GLI3R_BY_THE_PROTEASOME	56	-0.276159	-0.91038	0.625964	0.968992	0.860536	8525	tags=55%	list=48%	signal=29%	Psma7/Ubb/Psmd9/Psmb4/Psma2/Psmf1/Psmc3/Psmd5/Psmc1/Psme1/Psmd13/Psmb10/Psma4/Uba52/Sufu/Psmb1/Psma8/Psmc4/Psmd4/Rbx1/Psmb5/Psma6/Psmc5/Psmb6/Prkacb/Psmd10/Psme2/Psmb8/Skp1/Rps27a/Psme2b
REACTOME_NUCLEAR_ENVELOPE_BREAKDOWN	REACTOME_NUCLEAR_ENVELOPE_BREAKDOWN	46	-0.286756	-0.910407	0.617219	0.968908	0.860461	7712	tags=50%	list=44%	signal=28%	Rbm39/Seh1l/Cdk1/Aaas/Emd/Nup62/Ndc1/Nup153/Lmnb1/Nup35/Pom121/Nup93/Nup214/Nup85/Banf1/Nup133/Nup155/Nup107/Vrk1/Rae1/Vrk2/Prkcb/Nup210
REACTOME_CLASS_I_MHC_MEDIATED_ANTIGEN_PROCESSING_PRESENTATION	REACTOME_CLASS_I_MHC_MEDIATED_ANTIGEN_PROCESSING_PRESENTATION	336	-0.227652	-0.911503	0.732424	1	0.888073	7538	tags=40%	list=43%	signal=23%	Klhl20/Psmc1/Rlim/B2m/Znrf2/Cdc34/Trim39/Sec22b/Ube2d2a/Asb14/Cbll1/Psme1/Eloc/Ube2j2/Fbxl5/Canx/Ube2q2/Ufl1/Uba7/Anapc13/Asb4/Ube2k/Cdc23/Fbxl15/Siah2/Trim11/Psmd13/Psmb10/Psma4/Ccnf/Uba52/Elob/Herc1/Trim69/Fbxo22/Psmb1/Fbxo40/Psma8/Rnf138/Psmc4/Kbtbd8/Ube2e3/Psmd4/Ube2e1/Vhl/Rbx1/Trim37/Fbxl19/Ubr1/H2-T23/Rnf111/Psmb5/Asb7/Det1/Ube2l6/Psma6/Stub1/Psmc5/Fbxo7/Psmb6/Rnf220/Ube2s/Rnf34/Anapc10/Rnf…
REACTOME_HEDGEHOG_OFF_STATE	REACTOME_HEDGEHOG_OFF_STATE	105	-0.252965	-0.912853	0.640048	0.980518	0.870771	6690	tags=38%	list=38%	signal=24%	Tuba1a/Psmd13/Psmb10/Psma4/Uba52/Sufu/Psmb1/Psma8/Psmc4/Psmd4/Rbx1/Psmb5/Psma6/Psmc5/Ofd1/Psmb6/Kif7/Tubb3/Prkacb/Psmd10/Psme2/Psmb8/Rpgrip1l/Tuba1b/Adcy7/Skp1/Ift57/Tulp3/Dync2h1/Kif3a/Fuz/Tubb1/Rps27a/Wdr35/Mks1/Intu/Wdr19/Tubb2b/Psme2b/Prkar1b
REACTOME_THROMBIN_SIGNALLING_THROUGH_PROTEINASE_ACTIVATED_RECEPTORS_PARS	REACTOME_THROMBIN_SIGNALLING_THROUGH_PROTEINASE_ACTIVATED_RECEPTORS_PARS	32	-0.303258	-0.9141	0.58616	0.952207	0.845629	2630	tags=25%	list=15%	signal=21%	Gngt2/Gng10/Gna15/F2rl2/F2/Gng2/Gng11/Arrb2
REACTOME_METABOLISM_OF_AMINO_ACIDS_AND_DERIVATIVES	REACTOME_METABOLISM_OF_AMINO_ACIDS_AND_DERIVATIVES	231	-0.234427	-0.915174	0.675269	0.994159	0.882885	5046	tags=27%	list=28%	signal=20%	Shmt1/Rimklb/Slc5a5/Gstz1/Fah/Psmd10/Ivd/Tstd1/Psme2/Pipox/Psmb8/Asl/Slc6a7/Mri1/Agxt/Sephs2/Dmgdh/Ppm1k/Slc7a5/Dct/Aspg/Qdpr/Gatm/Ddc/Bcat1/Adi1/Prodh2/Agmat/Mtr/Bckdk/Slc25a15/Sms/Kynu/Cbs/Kmo/Aadat/Dio3/Uroc1/Pycr1/Mtrr/Amt/Sdsl/Dio1/Dao/Psph/Tyr/Tat/Duox1/Rida/Asrgl1/Psme2b/Ass1/Phgdh/Hykk/Il4i1/Ddo/Tshb/Aanat/Slc25a2/Arg1/Haao/Crym/Carns1
REACTOME_RAC2_GTPASE_CYCLE	REACTOME_RAC2_GTPASE_CYCLE	84	-0.261753	-0.916867	0.616505	0.968908	0.860461	2181	tags=17%	list=12%	signal=15%	Arhgap39/Ncf2/Ncf4/Ncf1/Rac2/Vrk2/Cybb/Def6/Dock2/Nckap1l/Cyba/Swap70/Nhs/Dock10
REACTOME_EPHB_MEDIATED_FORWARD_SIGNALING	REACTOME_EPHB_MEDIATED_FORWARD_SIGNALING	36	-0.303437	-0.918348	0.597781	0.960906	0.853354	3924	tags=19%	list=22%	signal=15%	Arhgef28/Lyn/Ephb3/Ephb6/Fyn/Efnb3/Ephb1
REACTOME_CHROMATIN_MODIFYING_ENZYMES	REACTOME_CHROMATIN_MODIFYING_ENZYMES	200	-0.237085	-0.918643	0.662309	0.992315	0.881248	6760	tags=39%	list=38%	signal=24%	Phf20/Ing5/Hdac3/H2bc9/H2aj/Rela/Prdm9/Smarcd3/Hcfc1/Padi4/Rbbp7/Hdac8/Rbbp5/Rps2/Gatad2a/Ing4/Mcrs1/Aebp2/Kmt2a/Mta1/Ogt/Sap30/Meaf6/Arid4a/Ehmt2/Nsd2/H2ac15/Kdm2b/Wdr5/H2bc21/Prmt5/H2ac13/Cdk4/Jade2/Chd4/H3c10/H4c9/Rbbp4/H2bc15/Hat1/Ccnd1/Rest/Kansl2/Wdr77/Suv39h1/H3c4/Arid5b/Mbd3/H3c8/Phf21a/H4c12/Actl6b/H3c13/Ash2l/Uty/Prmt1/H2bc13/H4c6/Prmt7/Smarcc1/H2bc22/H3c3/Padi2/Prmt3/Prmt6/Smyd3/Setdb2…
REACTOME_ANTIGEN_PROCESSING_UBIQUITINATION_PROTEASOME_DEGRADATION	REACTOME_ANTIGEN_PROCESSING_UBIQUITINATION_PROTEASOME_DEGRADATION	288	-0.231751	-0.918661	0.6902	0.995476	0.884055	8234	tags=46%	list=46%	signal=25%	Fbxl16/Psmd9/Rnf130/Anapc11/Psmb4/Asb6/Psma2/Psmf1/Psmc3/Anapc4/Ube2n/Klhl2/Ube2h/Anapc7/Fbxw8/Wwp1/Psmd5/Fbxl20/Klhl20/Psmc1/Rlim/Znrf2/Cdc34/Trim39/Ube2d2a/Asb14/Cbll1/Psme1/Eloc/Ube2j2/Fbxl5/Ube2q2/Ufl1/Uba7/Anapc13/Asb4/Ube2k/Cdc23/Fbxl15/Siah2/Trim11/Psmd13/Psmb10/Psma4/Ccnf/Uba52/Elob/Herc1/Trim69/Fbxo22/Psmb1/Fbxo40/Psma8/Rnf138/Psmc4/Kbtbd8/Ube2e3/Psmd4/Ube2e1/Vhl/Rbx1/Trim37/Fbxl19/Ubr1/…
REACTOME_INTERFERON_SIGNALING	REACTOME_INTERFERON_SIGNALING	121	-0.250488	-0.921384	0.643519	0.980518	0.870771	6777	tags=40%	list=38%	signal=25%	Eif4a2/Sumo1/Tuba1a/Uba52/Ybx1/Faap24/Ptpn2/Ube2e1/Ppp2r1b/Eif4a3/Plcg1/Fancf/Ube2l6/Stat2/Mapk1/Npm1/Sphk1/Eif2ak2/Tubb3/Cenpx/Ptpn6/Fance/Irf3/Fanca/Irf9/Tuba1b/Ifnar1/Trp53/Socs1/Ilf3/Ifnab/Hspa1l/Fancg/Cenps/Ilf2/Tubb1/Rps27a/Socs3/Ptpn1/Dus2/Fancl/Tubb2b/Mapt/Ifnar2/Camk2a/Ifng/Map2k6/Isg15/Tuba8
REACTOME_INITIATION_OF_NUCLEAR_ENVELOPE_NE_REFORMATION	REACTOME_INITIATION_OF_NUCLEAR_ENVELOPE_NE_REFORMATION	17	-0.358741	-0.921898	0.586861	0.952207	0.845629	8192	tags=65%	list=46%	signal=35%	Ankle2/Ccnb2/Kpnb1/Rbm39/Cdk1/Emd/Lmnb1/Banf1/Lbr/Vrk1/Vrk2
REACTOME_SYNTHESIS_OF_PC	REACTOME_SYNTHESIS_OF_PC	26	-0.320078	-0.922006	0.578659	0.946897	0.840914	981	tags=12%	list=6%	signal=11%	Pcyt1b/Slc44a2/Lpcat1
REACTOME_INTERLEUKIN_12_FAMILY_SIGNALING	REACTOME_INTERLEUKIN_12_FAMILY_SIGNALING	16	-0.367969	-0.926349	0.568012	0.941441	0.836068	1896	tags=62%	list=11%	signal=56%	P4hb/Il27/Stat3/Il12rb2/Il6st/Canx/Il12b/Il12a/Il27ra/Il23r
REACTOME_SIGNALING_BY_NOTCH1	REACTOME_SIGNALING_BY_NOTCH1	18	-0.355797	-0.926513	0.581766	0.949972	0.843644	3210	tags=72%	list=18%	signal=59%	Ubb/Dtx2/Maml1/Notch1/Rbpj/Uba52/Dtx4/Kat2a/Jag2/Mamld1/Maml2/Rps27a/Dtx1
REACTOME_THE_ROLE_OF_GTSE1_IN_G2_M_PROGRESSION_AFTER_G2_CHECKPOINT	REACTOME_THE_ROLE_OF_GTSE1_IN_G2_M_PROGRESSION_AFTER_G2_CHECKPOINT	73	-0.269067	-0.927887	0.587438	0.952207	0.845629	8525	tags=52%	list=48%	signal=27%	Psma7/Mapre1/Ubb/Psmd9/Psmb4/Psma2/Psmf1/Psmc3/Psmd5/Cdk1/Psmc1/Psme1/Gtse1/Tuba1a/Psmd13/Psmb10/Psma4/Uba52/Psmb1/Psma8/Psmc4/Psmd4/Psmb5/Psma6/Psmc5/Psmb6/Tubb3/Psmd10/Psme2/Psmb8/Tuba1b/Trp53/Tubb1/Rps27a/Tubb2b/Fkbpl/Psme2b/Tuba8
REACTOME_TRANSCRIPTIONAL_REGULATION_BY_RUNX3	REACTOME_TRANSCRIPTIONAL_REGULATION_BY_RUNX3	77	-0.26908	-0.933478	0.576687	0.946897	0.840914	8351	tags=55%	list=47%	signal=29%	Hdac4/Ubb/Psmd9/Psmb4/Psma2/Psmf1/Psmc3/Psmd5/Maml1/Psmc1/Notch1/Psme1/Lef1/Tead2/Rbpj/Psmd13/Psmb10/Psma4/Uba52/Psmb1/Psmc4/Psmd4/Psmb5/Cbfb/Psma6/Psmc5/Psmb6/Zfhx3/Smad4/Kat2a/Psmd10/Psme2/Psmb8/Ccnd1/Trp53/Mamld1/Maml2/Rps27a/Tgfb1/Psme2b/Tcf7/Runx3
REACTOME_DEFENSINS	REACTOME_DEFENSINS	34	-0.309239	-0.934981	0.571233	0.944731	0.83899	5545	tags=44%	list=31%	signal=30%	Defa20/Defa43/Defa37/Defa5/Defa36/Defa42/Defa41/Defa29/Defa34/Defa35/Defa21/Defa22/Cd4/Ccr6/Defa32
REACTOME_PEROXISOMAL_PROTEIN_IMPORT	REACTOME_PEROXISOMAL_PROTEIN_IMPORT	64	-0.279568	-0.938659	0.564721	0.941441	0.836068	4835	tags=28%	list=27%	signal=21%	Acot2/Pipox/Acot8/Agxt/Hmgcl/Tysnd1/Baat/Dhrs4/Slc27a2/Ube2d1/Cat/Rps27a/Dao/Acot1/Acox2/Ddo/Nos2/Hao2
REACTOME_OVARIAN_TUMOR_DOMAIN_PROTEASES	REACTOME_OVARIAN_TUMOR_DOMAIN_PROTEASES	32	-0.311461	-0.938828	0.554953	0.936238	0.831447	3919	tags=31%	list=22%	signal=24%	Trp53/Traf3/Tnip3/Tnfaip3/Ube2d1/Otub2/Rps27a/Ripk2/Nod1/Tnip2
REACTOME_SIGNALING_BY_HEDGEHOG	REACTOME_SIGNALING_BY_HEDGEHOG	136	-0.252313	-0.939507	0.610345	0.968845	0.860405	6690	tags=37%	list=38%	signal=23%	Tuba1a/Psmd13/Psmb10/Psma4/Uba52/Sufu/Psmb1/Psma8/Psmc4/Psmd4/Rbx1/Derl2/Dzip1/Grk2/Psmb5/Cdon/Psma6/Psmc5/Ofd1/Psmb6/Kif7/Tubb3/Prkacb/Psmd10/Psme2/Psmb8/Rpgrip1l/Tuba1b/Shh/Adcy7/Skp1/Ift57/Tulp3/Disp2/Dync2h1/Kif3a/Hhat/Fuz/Tubb1/Rps27a/Wdr35/Mks1/Intu/Wdr19/Tubb2b/Psme2b/Notum/Dhh/Arrb2/Prkar1b
REACTOME_REGULATION_OF_RUNX3_EXPRESSION_AND_ACTIVITY	REACTOME_REGULATION_OF_RUNX3_EXPRESSION_AND_ACTIVITY	53	-0.287469	-0.939973	0.578608	0.946897	0.840914	8525	tags=55%	list=48%	signal=28%	Psma7/Ubb/Psmd9/Psmb4/Psma2/Psmf1/Psmc3/Psmd5/Psmc1/Psme1/Psmd13/Psmb10/Psma4/Uba52/Psmb1/Psmc4/Psmd4/Psmb5/Cbfb/Psma6/Psmc5/Psmb6/Psmd10/Psme2/Psmb8/Rps27a/Tgfb1/Psme2b/Runx3
REACTOME_ANTIGEN_PROCESSING_CROSS_PRESENTATION	REACTOME_ANTIGEN_PROCESSING_CROSS_PRESENTATION	80	-0.271108	-0.944555	0.559364	0.937116	0.832227	6624	tags=54%	list=37%	signal=34%	Psmd9/H2-K1/Psmb4/Psma2/Psmf1/Psmc3/Cd36/Psmd5/Psmc1/B2m/Sec22b/Psme1/Psmd13/Psmb10/Psma4/Psmb1/Psma8/Psmc4/Psmd4/H2-T23/Psmb5/Psma6/Psmc5/Psmb6/Psmd10/Psme2/Psmb8/Vamp8/H2-Q4/Tap2/H2-T22/H2-M2/Tap1/H2-Q7/Tapbp/H2-M3/Ncf2/Ncf4/Ncf1/H2-Q6/Cybb/Psme2b/Cyba
REACTOME_CLASS_B_2_SECRETIN_FAMILY_RECEPTORS	REACTOME_CLASS_B_2_SECRETIN_FAMILY_RECEPTORS	52	-0.29012	-0.946215	0.566496	0.941441	0.836068	2630	tags=23%	list=15%	signal=20%	Gngt2/Gng10/Glp1r/Iapp/Gng2/Ramp3/Gcg/Gng11/Sct/Pth2r/Pthlh/Gip
REACTOME_REGULATION_OF_INSULIN_LIKE_GROWTH_FACTOR_IGF_TRANSPORT_AND_UPTAKE_BY_INSULIN_LIKE_GROWTH_FACTOR_BINDING_PROTEINS_IGFBPS	REACTOME_REGULATION_OF_INSULIN_LIKE_GROWTH_FACTOR_IGF_TRANSPORT_AND_UPTAKE_BY_INSULIN_LIKE_GROWTH_FACTOR_BINDING_PROTEINS_IGFBPS	110	-0.26135	-0.947825	0.588235	0.952207	0.845629	3477	tags=25%	list=20%	signal=20%	C4b/Ktn1/Rcn1/Fam20c/Fgf23/Serpind1/Dmp1/Apoa1/Apoa5/Pappa2/Fstl3/Msln/Megf6/F5/Csf1/Serpina10/Serpina1c/Shisa5/Chgb/Apol11a/Afp/Scg3/Notum/Meltf/Tmem132a/Mfge8/Serpina1b
REACTOME_CHONDROITIN_SULFATE_BIOSYNTHESIS	REACTOME_CHONDROITIN_SULFATE_BIOSYNTHESIS	19	-0.359139	-0.948169	0.546243	0.933775	0.82926	1209	tags=21%	list=7%	signal=20%	Chst11/Chst7/Chsy1/Chst3
REACTOME_CARGO_TRAFFICKING_TO_THE_PERICILIARY_MEMBRANE	REACTOME_CARGO_TRAFFICKING_TO_THE_PERICILIARY_MEMBRANE	38	-0.30967	-0.948433	0.549932	0.9346	0.829993	1474	tags=11%	list=8%	signal=10%	Arl6/Rho/Bbs5/Bbs1
REACTOME_COBALAMIN_CBL_VITAMIN_B12_TRANSPORT_AND_METABOLISM	REACTOME_COBALAMIN_CBL_VITAMIN_B12_TRANSPORT_AND_METABOLISM	15	-0.384746	-0.949547	0.52959	0.924986	0.821455	3450	tags=33%	list=19%	signal=27%	Mtr/Mmab/Abcc1/Cblif/Mtrr
REACTOME_NOREPINEPHRINE_NEUROTRANSMITTER_RELEASE_CYCLE	REACTOME_NOREPINEPHRINE_NEUROTRANSMITTER_RELEASE_CYCLE	17	-0.369667	-0.949977	0.551825	0.9346	0.829993	5592	tags=53%	list=32%	signal=36%	Vamp2/Snap25/Cplx1/Slc22a1/Maoa/Ppfia4/Tspoap1/Rab3a/Syt1
REACTOME_AMINO_ACIDS_REGULATE_MTORC1	REACTOME_AMINO_ACIDS_REGULATE_MTORC1	51	-0.293568	-0.951208	0.55642	0.936238	0.831447	7677	tags=49%	list=43%	signal=28%	Nprl3/Seh1l/Lamtor5/Atp6v0b/Mlst8/Atp6v0c/Lamtor1/Atp6v0d1/Atp6v1f/Atp6v1g1/Atp6v0e/Flcn/Slc38a9/Bmt2/Lamtor2/Atp6v1d/Depdc5/Wdr59/Atp6v1g3/Nprl2/Sh3bp4/Lamtor4/Atp6v0d2/Rragb/Atp6v1g2
REACTOME_NERVOUS_SYSTEM_DEVELOPMENT	REACTOME_NERVOUS_SYSTEM_DEVELOPMENT	259	-0.241852	-0.95172	0.623266	0.968908	0.860461	2283	tags=15%	list=13%	signal=14%	Dok1/St8sia4/Tubb1/Rps27a/Plxnc1/Gfra3/Sptbn4/Ephb6/Rps6ka5/Fyn/Gfra2/Msn/Dscam/Gap43/Tubb2b/Rnd1/Ptprc/Cxcl12/Sptb/Pfn2/Cdk5r1/Efnb3/Cxcr4/Sema4d/Evl/Cd72/Trem2/Prkcq/Pik3cd/Nfasc/Ephb1/Sptbn2/Dcc/Epha6/Tuba8/Ret/Crmp1/Plxna4/Dpysl5/Plxna3
REACTOME_DDX58_IFIH1_MEDIATED_INDUCTION_OF_INTERFERON_ALPHA_BETA	REACTOME_DDX58_IFIH1_MEDIATED_INDUCTION_OF_INTERFERON_ALPHA_BETA	32	-0.316	-0.952507	0.53867	0.930649	0.826484	3381	tags=44%	list=19%	signal=35%	Ikbkb/Nfkbib/Pin1/Rela/Uba52/Hmgb1/Irf3/Irf7/Tnfaip3/S100b/Rps27a/Nfkbia/Nfkb2/Ager
REACTOME_RHO_GTPASE_EFFECTORS	REACTOME_RHO_GTPASE_EFFECTORS	243	-0.243257	-0.953351	0.602784	0.964948	0.856945	5846	tags=28%	list=33%	signal=19%	Mad2l1/Noxa1/Zw10/Cenpp/Mapk1/Ndc80/Klc2/Pmf1/Srgap2/Prc1/Limk1/Ppp2r5c/Cdc20/Zwint/Tubb3/Incenp/Spc24/Pkn3/Nup85/Cenpe/Cenph/Ercc6l/Nup133/Tuba1b/Kif2c/Pak3/Rcc2/Rhog/Nup107/Cenpm/Nuf2/Wipf1/Clasp2/Ktn1/Iqgap3/Cenpq/Cenpl/Itgb3bp/Nsl1/Cenps/Kntc1/Ncf2/Tubb1/Ncf4/Ncf1/Cenpi/Dsn1/Rac2/Scai/Dvl2/Cenpo/Noxo1/Tubb2b/Rps27/Pfn2/Cybb/Mapk11/Ska1/Kif18a/Prkcb/Evl/Cenpn/Nckap1l/Cyba/Fmnl1/Btk/Fmnl3/Cyfip…
REACTOME_DECTIN_1_MEDIATED_NONCANONICAL_NF_KB_SIGNALING	REACTOME_DECTIN_1_MEDIATED_NONCANONICAL_NF_KB_SIGNALING	56	-0.289265	-0.953585	0.551414	0.9346	0.829993	8347	tags=55%	list=47%	signal=29%	Psma7/Ubb/Psmd9/Psmb4/Psma2/Psmf1/Psmc3/Psmd5/Psmc1/Psme1/Relb/Psmd13/Psmb10/Psma4/Uba52/Psmb1/Psma8/Psmc4/Psmd4/Psmb5/Psma6/Psmc5/Psmb6/Psmd10/Psme2/Psmb8/Skp1/Map3k14/Rps27a/Psme2b/Nfkb2
REACTOME_CHONDROITIN_SULFATE_DERMATAN_SULFATE_METABOLISM	REACTOME_CHONDROITIN_SULFATE_DERMATAN_SULFATE_METABOLISM	46	-0.30038	-0.953662	0.556291	0.936238	0.831447	1209	tags=13%	list=7%	signal=12%	Chst11/Chst7/Chst14/Chsy1/Chst3/Xylt1
REACTOME_INTRAFLAGELLAR_TRANSPORT	REACTOME_INTRAFLAGELLAR_TRANSPORT	44	-0.30173	-0.953866	0.540184	0.930957	0.826758	2496	tags=27%	list=14%	signal=23%	Tuba1b/Ift27/Ift57/Dync2h1/Kif3a/Tubb1/Wdr35/Wdr19/Kif17/Tubb2b/Ift80/Kif3c
REACTOME_ER_PHAGOSOME_PATHWAY	REACTOME_ER_PHAGOSOME_PATHWAY	26	-0.331972	-0.956269	0.515732	0.909986	0.808134	4271	tags=38%	list=24%	signal=29%	Vamp8/H2-Q4/Tap2/H2-T22/H2-M2/Tap1/H2-Q7/Tapbp/H2-M3/H2-Q6
REACTOME_LYSOSOME_VESICLE_BIOGENESIS	REACTOME_LYSOSOME_VESICLE_BIOGENESIS	34	-0.318605	-0.963299	0.513699	0.909986	0.808134	5725	tags=47%	list=32%	signal=32%	Ap4m1/Ap1s1/Clta/Cltb/Bloc1s1/Ap1s2/M6pr/Vamp2/Chmp2a/Txndc5/Ctsz/Vamp8/Ap1s3/Ap4s1/Dnase2a/Dnajc6
REACTOME_CELL_SURFACE_INTERACTIONS_AT_THE_VASCULAR_WALL	REACTOME_CELL_SURFACE_INTERACTIONS_AT_THE_VASCULAR_WALL	112	-0.265229	-0.963933	0.558685	0.937116	0.832227	2010	tags=18%	list=11%	signal=16%	Sirpa/Itgb2/Fyn/Tgfb1/F2/Cd48/Cd84/Slc7a6/Psg18/Fcamr/Lck/Spn/Sell/Itgal/Selplg/Itga4/Sirpb1a/Vpreb3/Sirpb1c/Gp6
REACTOME_ACETYLCHOLINE_NEUROTRANSMITTER_RELEASE_CYCLE	REACTOME_ACETYLCHOLINE_NEUROTRANSMITTER_RELEASE_CYCLE	17	-0.375467	-0.964881	0.529927	0.924986	0.821455	1782	tags=47%	list=10%	signal=42%	Vamp2/Snap25/Cplx1/Ppfia4/Tspoap1/Rab3a/Syt1/Slc5a7
REACTOME_REGULATION_OF_MRNA_STABILITY_BY_PROTEINS_THAT_BIND_AU_RICH_ELEMENTS	REACTOME_REGULATION_OF_MRNA_STABILITY_BY_PROTEINS_THAT_BIND_AU_RICH_ELEMENTS	83	-0.276003	-0.96685	0.515815	0.909986	0.808134	8225	tags=58%	list=46%	signal=31%	Ubb/Psmd9/Psmb4/Psma2/Psmf1/Psmc3/Xpo1/Parn/Khsrp/Psmd5/Psmc1/Psme1/Dcp1a/Pabpc1/Zfp36/Psmd13/Psmb10/Psma4/Dcp2/Uba52/Exosc2/Psmb1/Psma8/Psmc4/Psmd4/Exosc3/Exosc1/Psmb5/Psma6/Psmc5/Psmb6/Anp32a/Nup214/Psmd10/Psme2/Psmb8/Exosc7/Xrn1/Set/Exosc8/Zfp36l1/Exosc4/Exosc6/Hnrnpd/Exosc9/Rps27a/Exosc5/Psme2b
REACTOME_TRANSCRIPTIONAL_REGULATION_BY_RUNX1	REACTOME_TRANSCRIPTIONAL_REGULATION_BY_RUNX1	183	-0.251317	-0.966979	0.541254	0.930957	0.826758	6662	tags=41%	list=38%	signal=26%	H2bc9/Psmd13/Psmb10/H2aj/Psma4/Ring1/Uba52/Smarcd3/Psmb1/Psma8/Psmc4/Psmd4/Bmi1/H3f3a/Rbbp5/Phc3/Psmb5/Kmt2a/Cbfb/Psma6/Cbx8/Rnf2/Psmc5/H3f3b/Psmb6/Pml/H2ac15/Psmd10/Wdr5/H2bc21/H2ac13/Psme2/Psmb8/H3c10/H2ax/H4c9/H2az2/H2bc15/Cbx4/Ccnd1/Ldb1/Zfpm1/H3c4/H3c8/Mnat1/H4c12/Actl6b/Ccnh/H3c13/Ash2l/Prmt1/H2bc13/H4c6/Smarcc1/H2bc22/H3c3/Tcf3/Rps27a/Prmt6/Ccnd3/Cbx2/Lmo2/Psme2b/H2bc8/Pax5/H2ac7/Foxp3/H3c…
REACTOME_ION_CHANNEL_TRANSPORT	REACTOME_ION_CHANNEL_TRANSPORT	159	-0.255944	-0.970453	0.533183	0.9253	0.821734	2325	tags=15%	list=13%	signal=13%	Trpc1/Trpa1/Rps27a/Trpc3/Atp8b2/Unc80/Asic5/Trpc4/Atp6v0d2/Ryr1/Trpm2/Camk2a/Trpv4/Fxyd7/Ano2/Best1/Trdn/Stom/Atp6v1g2/Atp2b3/Trpm3/Ano5/Trpm6/Nalcn
REACTOME_CD209_DC_SIGN_SIGNALING	REACTOME_CD209_DC_SIGN_SIGNALING	17	-0.377933	-0.971218	0.522628	0.91935	0.81645	5022	tags=47%	list=28%	signal=34%	Relb/Rela/Prkacb/Pak3/Lyn/Icam2/Rps6ka5/Fyn
REACTOME_RUNX1_INTERACTS_WITH_CO_FACTORS_WHOSE_PRECISE_EFFECT_ON_RUNX1_TARGETS_IS_NOT_KNOWN	REACTOME_RUNX1_INTERACTS_WITH_CO_FACTORS_WHOSE_PRECISE_EFFECT_ON_RUNX1_TARGETS_IS_NOT_KNOWN	33	-0.322021	-0.971261	0.504121	0.905312	0.803983	7643	tags=58%	list=43%	signal=33%	Phc1/Actl6a/Smarcb1/Phc2/Csnk2b/Smarcd2/Auts2/Cbx6/Ring1/Smarcd3/Bmi1/Phc3/Cbfb/Cbx8/Rnf2/Cbx4/Actl6b/Smarcc1/Cbx2
REACTOME_AMINE_LIGAND_BINDING_RECEPTORS	REACTOME_AMINE_LIGAND_BINDING_RECEPTORS	35	-0.322082	-0.97354	0.508916	0.909536	0.807734	4132	tags=40%	list=23%	signal=31%	Adrb1/Htr2b/Htr1d/Hrh1/Htr1f/Htr5a/Taar1/Htr7/Adra2a/Drd4/Hrh2/Adrb2/Adra1a/Hrh3
REACTOME_SIGNALING_BY_NUCLEAR_RECEPTORS	REACTOME_SIGNALING_BY_NUCLEAR_RECEPTORS	204	-0.251503	-0.975531	0.538043	0.930649	0.826484	2780	tags=15%	list=16%	signal=13%	H2bc13/H4c6/Gngt2/Polr2d/Nr1h3/Polr2g/Polr2h/Gng10/H2bc22/H3c3/S1pr3/Fabp5/Gng2/Pdk4/Mmp3/Gng11/H2bc8/Crabp2/H3c6/H2bc23/H2bc24/H3c14/Adh4/Rdh1/Crabp1/H4c18/Egf/Cited1/Sdr16c5/H2bc11
REACTOME_INTRINSIC_PATHWAY_OF_FIBRIN_CLOT_FORMATION	REACTOME_INTRINSIC_PATHWAY_OF_FIBRIN_CLOT_FORMATION	22	-0.3553	-0.976401	0.511173	0.909536	0.807734	2690	tags=32%	list=15%	signal=27%	Serpind1/Klkb1/A2m/F2/Prcp/F9/Gp9
REACTOME_SYNTHESIS_OF_PIPS_AT_THE_EARLY_ENDOSOME_MEMBRANE	REACTOME_SYNTHESIS_OF_PIPS_AT_THE_EARLY_ENDOSOME_MEMBRANE	15	-0.395824	-0.976887	0.481032	0.883493	0.784606	4985	tags=33%	list=28%	signal=24%	Mtm1/Pik3c2a/Pikfyve/Inpp5f/Inpp4b
REACTOME_MHC_CLASS_II_ANTIGEN_PRESENTATION	REACTOME_MHC_CLASS_II_ANTIGEN_PRESENTATION	111	-0.269434	-0.978579	0.52879	0.924986	0.821455	7122	tags=37%	list=40%	signal=22%	Dctn3/Canx/Ap2a2/Kif22/H2-Ab1/Ctss/Tuba1a/Lgmn/Racgap1/Kif5a/H2-DMa/Ifi30/H2-Eb1/Ctsa/H2-DMb1/Ap1s2/Klc2/Ap2s1/Cd74/Tubb3/Cenpe/Ctse/Dctn6/Kif23/Tuba1b/Kif2c/Ap1s3/Lag3/Ctsh/Kif3a/Tubb1/Tubb2b/Kif3c/Kif18a/H2-Oa/H2-DMb2/Ctsf/H2-Ob/Sptbn2/H2-Eb2/Tuba8
REACTOME_SIGNALING_BY_ERBB4	REACTOME_SIGNALING_BY_ERBB4	33	-0.325583	-0.982004	0.486264	0.883493	0.784606	494	tags=9%	list=3%	signal=9%	Nrg3/Stat5a/Egf
REACTOME_FLT3_SIGNALING	REACTOME_FLT3_SIGNALING	29	-0.33421	-0.982253	0.476987	0.881118	0.782497	4950	tags=34%	list=28%	signal=25%	Akt3/Csk/Syk/Sla2/Sh2b3/Rps27a/Sla/Lck/Grap2/Flt3l
REACTOME_DOPAMINE_NEUROTRANSMITTER_RELEASE_CYCLE	REACTOME_DOPAMINE_NEUROTRANSMITTER_RELEASE_CYCLE	23	-0.354079	-0.982328	0.485232	0.883493	0.784606	1782	tags=22%	list=10%	signal=20%	Tspoap1/Rab3a/Syn3/Syt1/Syn1
REACTOME_MAPK_TARGETS_NUCLEAR_EVENTS_MEDIATED_BY_MAP_KINASES	REACTOME_MAPK_TARGETS_NUCLEAR_EVENTS_MEDIATED_BY_MAP_KINASES	28	-0.336793	-0.985428	0.469274	0.879462	0.781027	3028	tags=25%	list=17%	signal=21%	Ppp2r1b/Vrk3/Mapk1/Dusp7/Rps6ka5/Mapk11/Mapk10
REACTOME_SIGNALING_BY_NOTCH	REACTOME_SIGNALING_BY_NOTCH	39	-0.319517	-0.987403	0.483784	0.883493	0.784606	2302	tags=15%	list=13%	signal=13%	Dll4/Mamld1/Maml2/Rps27a/Dtx1/Egf
REACTOME_STABILIZATION_OF_P53	REACTOME_STABILIZATION_OF_P53	54	-0.301981	-0.990927	0.48906	0.884422	0.785432	8525	tags=59%	list=48%	signal=31%	Psma7/Ubb/Psmd9/Psmb4/Psma2/Psmf1/Psmc3/Psmd5/Psmc1/Mdm4/Psme1/Phf20/Psmd13/Psmb10/Psma4/Uba52/Psmb1/Psma8/Psmc4/Psmd4/Psmb5/Psma6/Psmc5/Psmb6/Psmd10/Chek2/Psme2/Psmb8/Trp53/Atm/Rps27a/Psme2b
REACTOME_ACTIVATION_OF_IRF3_IRF7_MEDIATED_BY_TBK1_IKK_IKBKE	REACTOME_ACTIVATION_OF_IRF3_IRF7_MEDIATED_BY_TBK1_IKK_IKBKE	18	-0.380753	-0.9915	0.493488	0.888278	0.788855	4704	tags=39%	list=27%	signal=29%	Irf3/Ticam2/Traf3/Irf7/Cd14/Rps27a/Sarm1
REACTOME_EICOSANOIDS	REACTOME_EICOSANOIDS	15	-0.40183	-0.99171	0.459788	0.872244	0.774616	2916	tags=33%	list=16%	signal=28%	Cyp4f39/Cyp4a29/Cyp4a12a/Cyp4a14/Cyp4f18
REACTOME_CDC42_GTPASE_CYCLE	REACTOME_CDC42_GTPASE_CYCLE	92	-0.280412	-0.99186	0.489024	0.884422	0.785432	3681	tags=24%	list=21%	signal=19%	Lbr/Arap1/Ktn1/Myo9b/Prex1/Tagap/Arhgap39/Arhgap22/Arhgap44/Fgd1/Arhgap30/Arhgap4/Def6/Dock11/Arhgef6/Srgap3/Arhgdib/Arhgap9/Fgd3/Dock10/Arhgap45/Arhgdig
REACTOME_CARGO_RECOGNITION_FOR_CLATHRIN_MEDIATED_ENDOCYTOSIS	REACTOME_CARGO_RECOGNITION_FOR_CLATHRIN_MEDIATED_ENDOCYTOSIS	100	-0.27947	-0.999205	0.478313	0.881463	0.782803	2677	tags=16%	list=15%	signal=14%	Syt8/Sh3kbp1/Syt11/Reps1/Cd4/Rps27a/Dvl2/Syt1/Adrb2/Snap91/Il7r/Arrb2/Cd3g/Cd3d/Fcho1/Egf
REACTOME_G0_AND_EARLY_G1	REACTOME_G0_AND_EARLY_G1	17	-0.38975	-1.00158	0.481752	0.883493	0.784606	6057	tags=53%	list=34%	signal=35%	Lin37/Rbl2/Lin52/Cdk2/E2f5/Ccna1/Lin9/Rbbp4/Ccne1
REACTOME_TRANSCRIPTIONAL_REGULATION_BY_E2F6	REACTOME_TRANSCRIPTIONAL_REGULATION_BY_E2F6	23	-0.361204	-1.00209	0.445851	0.860957	0.764592	8319	tags=74%	list=47%	signal=39%	Epc1/Eed/Phc1/Ehmt1/Ezh2/Ring1/Rbbp7/Bmi1/Max/Phc3/Rnf2/Ehmt2/Pcgf2/Pcgf6/Rbbp4/L3mbtl2/Chek1
REACTOME_UBIQUITIN_MEDIATED_DEGRADATION_OF_PHOSPHORYLATED_CDC25A	REACTOME_UBIQUITIN_MEDIATED_DEGRADATION_OF_PHOSPHORYLATED_CDC25A	50	-0.309792	-1.00288	0.472114	0.881118	0.782497	8525	tags=58%	list=48%	signal=30%	Psma7/Ubb/Psmd9/Psmb4/Psma2/Psmf1/Psmc3/Psmd5/Psmc1/Psme1/Psmd13/Psmb10/Psma4/Uba52/Psmb1/Psma8/Psmc4/Psmd4/Psmb5/Psma6/Psmc5/Psmb6/Psmd10/Chek2/Psme2/Psmb8/Chek1/Rps27a/Psme2b
REACTOME_RHOV_GTPASE_CYCLE	REACTOME_RHOV_GTPASE_CYCLE	36	-0.331537	-1.00339	0.450763	0.860957	0.764592	3163	tags=22%	list=18%	signal=18%	Git2/Rhov/Pard6a/Myo9a/Ccp110/Cep97/Wdr6/Zfp512b
REACTOME_PLASMA_LIPOPROTEIN_REMODELING	REACTOME_PLASMA_LIPOPROTEIN_REMODELING	24	-0.357531	-1.00644	0.440278	0.860957	0.764592	2426	tags=25%	list=14%	signal=22%	Apoa1/Apoa5/Lcat/Abcg1/Angptl4/Lipc
REACTOME_TAK1_DEPENDENT_IKK_AND_NF_KAPPA_B_ACTIVATION	REACTOME_TAK1_DEPENDENT_IKK_AND_NF_KAPPA_B_ACTIVATION	37	-0.330649	-1.00725	0.451169	0.860957	0.764592	2613	tags=68%	list=15%	signal=58%	Ube2v1/Irak1/Ubb/Nkiras1/Casp8/Ube2n/Nfkb1/Irak2/Ikbkb/Nfkbib/Tab3/Rela/Uba52/Usp14/Tab1/Hmgb1/Traf2/Alpk1/S100b/Rps27a/Nfkbia/Nlrc5/Nfkb2/Ager/Tifa
REACTOME_CYTOSOLIC_SENSORS_OF_PATHOGEN_ASSOCIATED_DNA	REACTOME_CYTOSOLIC_SENSORS_OF_PATHOGEN_ASSOCIATED_DNA	32	-0.334606	-1.00859	0.442334	0.860957	0.764592	7076	tags=50%	list=40%	signal=30%	Ikbkb/Nfkbib/Rela/Uba52/Dtx4/Myd88/Irf3/Ddx41/Trim21/Irf7/Nlrp4c/Aim2/Rps27a/Sting1/Nfkbia/Nfkb2
REACTOME_SIGNALING_BY_ALK	REACTOME_SIGNALING_BY_ALK	17	-0.392782	-1.00938	0.467153	0.87799	0.779719	5801	tags=53%	list=33%	signal=36%	Stat3/Hdac3/Plcg1/Ptpn6/Ptn/Mdk/Alkal1/Alkal2/Alk
REACTOME_HDACS_DEACETYLATE_HISTONES	REACTOME_HDACS_DEACETYLATE_HISTONES	86	-0.287992	-1.01088	0.447016	0.860957	0.764592	1083	tags=33%	list=6%	signal=31%	H2bc21/H2ac13/Chd4/H3c10/H4c9/Rbbp4/H2bc15/Rest/H3c4/Mbd3/H3c8/Phf21a/H4c12/H3c13/H2bc13/H4c6/H2bc22/H3c3/H2bc8/H2ac7/H3c6/H2bc23/H2ac23/H2bc24/H2ac6/H3c14/H4c18/H2bc11
REACTOME_RAB_GERANYLGERANYLATION	REACTOME_RAB_GERANYLGERANYLATION	62	-0.301973	-1.01232	0.419847	0.846247	0.751529	3385	tags=23%	list=19%	signal=18%	Rab3d/Rab40b/Rab12/Rab2b/Rab39b/Rab8b/Rab19/Rab4b/Rab24/Rab3a/Rab32/Rab39/Rab3b/Rab3c
REACTOME_POST_NMDA_RECEPTOR_ACTIVATION_EVENTS	REACTOME_POST_NMDA_RECEPTOR_ACTIVATION_EVENTS	15	-0.41122	-1.01488	0.426404	0.846247	0.751529	1808	tags=40%	list=10%	signal=36%	Calm1/Prkar1a/Calm3/Prkacb/Rps6ka6/Prkar1b
REACTOME_HS_GAG_BIOSYNTHESIS	REACTOME_HS_GAG_BIOSYNTHESIS	28	-0.346917	-1.01505	0.413408	0.846247	0.751529	663	tags=11%	list=4%	signal=10%	Hs6st2/Ndst4/Hs3st2
REACTOME_REGULATION_OF_RUNX2_EXPRESSION_AND_ACTIVITY	REACTOME_REGULATION_OF_RUNX2_EXPRESSION_AND_ACTIVITY	51	-0.313921	-1.01716	0.45655	0.86823	0.771052	8525	tags=57%	list=48%	signal=30%	Psma7/Ubb/Psmd9/Psmb4/Psma2/Psmf1/Psmc3/Psmd5/Psmc1/Psme1/Psmd13/Psmb10/Psma4/Uba52/Psmb1/Psmc4/Psmd4/Rbx1/Psmb5/Psma6/Stub1/Psmc5/Psmb6/Psmd10/Psme2/Psmb8/Skp1/Rps27a/Psme2b
REACTOME_PKR_MEDIATED_SIGNALING	REACTOME_PKR_MEDIATED_SIGNALING	65	-0.301809	-1.01809	0.420786	0.846247	0.751529	5660	tags=37%	list=32%	signal=25%	Fancf/Ube2l6/Npm1/Sphk1/Eif2ak2/Tubb3/Cenpx/Fance/Fanca/Tuba1b/Trp53/Ilf3/Hspa1l/Fancg/Cenps/Ilf2/Tubb1/Dus2/Fancl/Tubb2b/Mapt/Map2k6/Isg15/Tuba8
REACTOME_NUCLEAR_ENVELOPE_NE_REASSEMBLY	REACTOME_NUCLEAR_ENVELOPE_NE_REASSEMBLY	65	-0.302209	-1.01944	0.418251	0.846247	0.751529	7737	tags=54%	list=44%	signal=30%	Chmp4b/Ahctf1/Kpnb1/Chmp2b/Rangap1/Rbm39/Chmp7/Seh1l/Cdk1/Emd/Ran/Chmp6/Sumo1/Ndc1/Tuba1a/Lmnb1/Nup35/Pom121/Nup93/Rcc1/Chmp2a/Tubb3/Nup85/Banf1/Nup133/Tuba1b/Cc2d1b/Nup155/Lbr/Nup107/Vrk1/Tubb1/Tubb2b/Vrk2/Tuba8
REACTOME_NUCLEAR_EVENTS_KINASE_AND_TRANSCRIPTION_FACTOR_ACTIVATION	REACTOME_NUCLEAR_EVENTS_KINASE_AND_TRANSCRIPTION_FACTOR_ACTIVATION	27	-0.353292	-1.02267	0.416089	0.846247	0.751529	6119	tags=33%	list=35%	signal=22%	Ppp2r1b/Vrk3/Mapk1/Chd4/Nab2/Dusp7/Rps6ka5/Mapk11/Egr2
REACTOME_CLATHRIN_MEDIATED_ENDOCYTOSIS	REACTOME_CLATHRIN_MEDIATED_ENDOCYTOSIS	139	-0.273377	-1.02337	0.423383	0.846247	0.751529	844	tags=9%	list=5%	signal=8%	Syt1/Pacsin1/Adrb2/Snap91/Il7r/Bin1/Arrb2/Cd3g/Cd3d/Fcho1/Dnajc6/Egf
REACTOME_GLYOXYLATE_METABOLISM_AND_GLYCINE_DEGRADATION	REACTOME_GLYOXYLATE_METABOLISM_AND_GLYCINE_DEGRADATION	18	-0.393433	-1.02452	0.442836	0.860957	0.764592	4295	tags=28%	list=24%	signal=21%	Agxt/Prodh2/Amt/Dao/Ddo
REACTOME_SIGNALING_BY_PTK6	REACTOME_SIGNALING_BY_PTK6	48	-0.319166	-1.02464	0.424282	0.846247	0.751529	3542	tags=25%	list=20%	signal=20%	Arap1/Elmo1/Ccne1/Dok1/Rps27a/Socs3/Ptpn1/Srms/Lrrk2/Nrg3/Ptk6/Egf
REACTOME_TRAFFICKING_OF_GLUR2_CONTAINING_AMPA_RECEPTORS	REACTOME_TRAFFICKING_OF_GLUR2_CONTAINING_AMPA_RECEPTORS	16	-0.408203	-1.02764	0.426009	0.846247	0.751529	1081	tags=19%	list=6%	signal=18%	Grip2/Prkcb/Grip1
REACTOME_PURINE_CATABOLISM	REACTOME_PURINE_CATABOLISM	17	-0.400479	-1.02916	0.442336	0.860957	0.764592	3733	tags=29%	list=21%	signal=23%	Pnp/Nudt1/Dnph1/Nudt18/Pnp2
REACTOME_FORMATION_OF_RNA_POL_II_ELONGATION_COMPLEX	REACTOME_FORMATION_OF_RNA_POL_II_ELONGATION_COMPLEX	54	-0.314145	-1.03084	0.416988	0.846247	0.751529	8415	tags=56%	list=47%	signal=29%	Ercc2/Supt5/Leo1/Ccnk/Polr2c/Tcea1/Polr2i/Nelfb/Eaf2/Polr2b/Eloc/Cdk7/Polr2f/Elob/Nelfcd/Polr2k/Polr2e/Supt4a/Polr2l/Supt16/Gtf2h4/Nelfe/Cdk9/Ssrp1/Gtf2h3/Mnat1/Ccnh/Polr2d/Polr2g/Polr2h
REACTOME_VISUAL_PHOTOTRANSDUCTION	REACTOME_VISUAL_PHOTOTRANSDUCTION	80	-0.296544	-1.03318	0.403917	0.842673	0.748355	2426	tags=15%	list=14%	signal=13%	Apoa1/Awat2/Sag/Lrp8/Rho/Stra6/Rdh12/Ppef1/Ttr/Rdh1/Rgs9bp/Cnga1
REACTOME_METABOLISM_OF_FOLATE_AND_PTERINES	REACTOME_METABOLISM_OF_FOLATE_AND_PTERINES	17	-0.402261	-1.03374	0.432117	0.85321	0.757713	5046	tags=41%	list=28%	signal=29%	Shmt1/Mthfs/Mthfsl/Mthfd2l/Slc19a1/Mthfd1l/Aldh1l2
REACTOME_GAMMA_CARBOXYLATION_HYPUSINYLATION_HYDROXYLATION_AND_ARYLSULFATASE_ACTIVATION	REACTOME_GAMMA_CARBOXYLATION_HYPUSINYLATION_HYDROXYLATION_AND_ARYLSULFATASE_ACTIVATION	55	-0.314095	-1.03394	0.412371	0.846247	0.751529	5726	tags=42%	list=32%	signal=28%	Tpst2/Riox1/Rwdd1/Rccd1/Arsk/Jmjd4/Sumf2/Drg1/Rpl8/Rps6/Rpl27a/Drg2/Arsb/Ggcx/Fn3krp/Bglap2/Rps23/Dph6/Jmjd7/F2/F9/Arsg/Fn3k
REACTOME_CELLULAR_SENESCENCE	REACTOME_CELLULAR_SENESCENCE	144	-0.276177	-1.03426	0.401584	0.842673	0.748355	5357	tags=31%	list=30%	signal=21%	Cdk2/Ube2s/Anapc16/Acd/Anapc10/Ehmt2/Cdc26/H2ac15/H2bc21/H2ac13/Cdk4/Ccna1/H2ax/H4c9/H2az2/Map3k5/Rbbp4/Ube2c/H2bc15/Trp53/Cebpb/Atm/H4c12/Ccne1/Ube2d1/Id1/H2bc13/H4c6/H2bc22/Cdc16/Rps27a/Mapk11/H2bc8/Ets1/Pot1a/Map2k6/H2ac7/H2bc23/H2ac23/Mapk10/H2bc24/H2ac6/H4c18/H2bc11
REACTOME_GLUCAGON_LIKE_PEPTIDE_1_GLP1_REGULATES_INSULIN_SECRETION	REACTOME_GLUCAGON_LIKE_PEPTIDE_1_GLP1_REGULATES_INSULIN_SECRETION	32	-0.343328	-1.03488	0.409769	0.846247	0.751529	2630	tags=25%	list=15%	signal=21%	Gngt2/Gng10/Glp1r/Gng2/Gcg/Gng11/Kcnc2/Rapgef4
REACTOME_INTERCONVERSION_OF_NUCLEOTIDE_DI_AND_TRIPHOSPHATES	REACTOME_INTERCONVERSION_OF_NUCLEOTIDE_DI_AND_TRIPHOSPHATES	27	-0.357636	-1.03524	0.396671	0.842203	0.747938	9216	tags=78%	list=52%	signal=37%	Tyms/Rrm2b/Ak2/Ak4/Ak6/Dctd/Rrm2/Glrx/Nme2/Txn1/Nudt13/Nme1/Dtymk/Ak1/Ctps2/Rrm1/Guk1/Dut/Ak8/Nme3/Ak7
REACTOME_FORMATION_OF_WDR5_CONTAINING_HISTONE_MODIFYING_COMPLEXES	REACTOME_FORMATION_OF_WDR5_CONTAINING_HISTONE_MODIFYING_COMPLEXES	38	-0.338449	-1.03658	0.406293	0.845351	0.750733	7173	tags=61%	list=40%	signal=36%	Cxxc1/Yeats2/Akap8l/Wdr82/Mbip/Pagr1a/Paxip1/Phf20/Zzz3/Kat14/Hcfc1/Rbbp5/Mcrs1/Kmt2a/Ogt/Kat2a/Wdr5/Kansl2/Tada2a/Sgf29/Ash2l/Tasp1/Psip1
REACTOME_G1_S_DNA_DAMAGE_CHECKPOINTS	REACTOME_G1_S_DNA_DAMAGE_CHECKPOINTS	64	-0.309239	-1.03828	0.39467	0.842203	0.747938	8347	tags=55%	list=47%	signal=29%	Ubb/Psmd9/Psmb4/Psma2/Psmf1/Psmc3/Psmd5/Psmc1/Mdm4/Psme1/Phf20/Psmd13/Psmb10/Psma4/Uba52/Psmb1/Psma8/Psmc4/Psmd4/Psmb5/Psma6/Psmc5/Psmb6/Cdk2/Psmd10/Chek2/Psme2/Psmb8/Ccna1/Chek1/Trp53/Atm/Ccne1/Rps27a/Psme2b
REACTOME_INTERFERON_ALPHA_BETA_SIGNALING	REACTOME_INTERFERON_ALPHA_BETA_SIGNALING	20	-0.387439	-1.04009	0.416667	0.846247	0.751529	4902	tags=50%	list=28%	signal=36%	Stat2/Ptpn6/Irf9/Ifnar1/Socs1/Ifnab/Rps27a/Socs3/Ptpn1/Ifnar2
REACTOME_ACTIVATION_OF_BH3_ONLY_PROTEINS	REACTOME_ACTIVATION_OF_BH3_ONLY_PROTEINS	18	-0.399528	-1.04039	0.416787	0.846247	0.751529	1862	tags=22%	list=11%	signal=20%	Bmf/Pmaip1/Ppp3cc/Bcl2
REACTOME_CYCLIN_A_CDK2_ASSOCIATED_EVENTS_AT_S_PHASE_ENTRY	REACTOME_CYCLIN_A_CDK2_ASSOCIATED_EVENTS_AT_S_PHASE_ENTRY	71	-0.303419	-1.04095	0.410891	0.846247	0.751529	8347	tags=55%	list=47%	signal=29%	Ubb/Psmd9/Psmb4/Psma2/Psmf1/Psmc3/Akt2/Psmd5/Psmc1/Psme1/Cdk7/Psmd13/Psmb10/Psma4/Uba52/Psmb1/Psmc4/Psmd4/Psmb5/Psma6/Psmc5/Psmb6/Cdk2/Akt3/Psmd10/Psme2/Cdk4/Psmb8/Ccna1/Cks1b/Ccnd1/Skp1/Mnat1/Ccne1/Ccnh/Cdc25b/Rps27a/Psme2b/Ptk6
REACTOME_G_ALPHA_Z_SIGNALLING_EVENTS	REACTOME_G_ALPHA_Z_SIGNALLING_EVENTS	33	-0.346812	-1.04603	0.403846	0.842673	0.748355	2630	tags=27%	list=15%	signal=23%	Gngt2/Rgs20/Gng10/Adra2a/Gng2/Gnaz/Gng11/Rgs16/Rgs17
REACTOME_INTERLEUKIN_3_INTERLEUKIN_5_AND_GM_CSF_SIGNALING	REACTOME_INTERLEUKIN_3_INTERLEUKIN_5_AND_GM_CSF_SIGNALING	41	-0.336663	-1.04754	0.401342	0.842673	0.748355	4272	tags=29%	list=24%	signal=22%	Rapgef1/Syk/Stat5b/Lyn/Inpp5d/Il2rb/Rps27a/Fyn/Pik3cd/Il2rg/Stat5a/Il2ra
REACTOME_RHO_GTPASES_ACTIVATE_WASPS_AND_WAVES	REACTOME_RHO_GTPASES_ACTIVATE_WASPS_AND_WAVES	33	-0.347317	-1.04756	0.401099	0.842673	0.748355	968	tags=9%	list=5%	signal=9%	Nckap1l/Btk/Cyfip2
REACTOME_RMTS_METHYLATE_HISTONE_ARGININES	REACTOME_RMTS_METHYLATE_HISTONE_ARGININES	67	-0.308355	-1.04975	0.37469	0.807827	0.717409	5014	tags=40%	list=28%	signal=29%	H2ac15/Wdr5/Prmt5/H2ac13/Cdk4/H3c10/H4c9/Ccnd1/Wdr77/H3c4/H3c8/H4c12/Actl6b/H3c13/Prmt1/H4c6/Prmt7/Smarcc1/H3c3/Prmt3/Prmt6/H2ac7/H3c6/H2ac23/H2ac6/H3c14/H4c18
REACTOME_DEGRADATION_OF_DVL	REACTOME_DEGRADATION_OF_DVL	55	-0.319128	-1.05051	0.386598	0.831186	0.738153	8525	tags=60%	list=48%	signal=31%	Psma7/Ubb/Psmd9/Psmb4/Psma2/Psmf1/Psmc3/Psmd5/Dact1/Psmc1/Psme1/Klhl12/Psmd13/Psmb10/Psma4/Uba52/Psmb1/Psma8/Psmc4/Psmd4/Dvl1/Rbx1/Psmb5/Psma6/Psmc5/Psmb6/Psmd10/Psme2/Psmb8/Rps27a/Dvl2/Hecw1/Psme2b
REACTOME_DARPP_32_EVENTS	REACTOME_DARPP_32_EVENTS	16	-0.419619	-1.05638	0.396114	0.842203	0.747938	1429	tags=50%	list=8%	signal=46%	Prkar1a/Ppp2r5d/Ppp2r1b/Prkacb/Pde4c/Pde4a/Pde4b/Prkar1b
REACTOME_PEROXISOMAL_LIPID_METABOLISM	REACTOME_PEROXISOMAL_LIPID_METABOLISM	27	-0.365018	-1.05661	0.368932	0.799869	0.710342	1584	tags=15%	list=9%	signal=14%	Slc27a2/Acox2/Acot6/Hao2
REACTOME_RHOH_GTPASE_CYCLE	REACTOME_RHOH_GTPASE_CYCLE	35	-0.351573	-1.06268	0.359396	0.787715	0.699548	2170	tags=29%	list=12%	signal=25%	Csk/Nsfl1c/Tuba1b/Mtr/Zap70/Rhoh/Lck/Arhgdib/Stom/Arhgdig
REACTOME_NEUTROPHIL_DEGRANULATION	REACTOME_NEUTROPHIL_DEGRANULATION	493	-0.26216	-1.06668	0.28192	0.705679	0.626694	4997	tags=30%	list=28%	signal=22%	Itgax/Creg1/Atp11a/Ormdl3/Ptpn6/Neu1/Abca13/Rnaset2b/Gla/Naprt/Tubb5/Txndc5/Lamtor2/Defa36/Atp6v1d/Tnfrsf1b/Ahsg/Gpr84/Pycard/Slc15a4/Pfkl/Cep290/Serpina3f/Defa42/Ctsz/Rnaset2a/Unc13d/Vamp8/Dynlt1b/H2-Q4/Glipr1/Ticam2/Commd3/Xrcc5/Fcgr2b/Defa41/Tyrobp/2310033P09Rik/Fcer1g/Rab3d/C3/Rhog/Olfm4/Aprt/Pnp/Scamp1/Tmem179b/Defa29/Gm2a/Nit2/Lcn2/Cd14/H2-T22/Ptafr/H2-M2/Slc27a2/Pglyrp1/Hebp2/Arsb/Lrrc7/De…
REACTOME_INTERLEUKIN_RECEPTOR_SHC_SIGNALING	REACTOME_INTERLEUKIN_RECEPTOR_SHC_SIGNALING	22	-0.389037	-1.06911	0.349162	0.769947	0.683769	742	tags=41%	list=4%	signal=39%	Csf2/Grb2/Csf2rb/Ptpn6/Inpp5d/Il2rb/Pik3cd/Il2rg/Il2ra
REACTOME_SYNTHESIS_OF_ACTIVE_UBIQUITIN_ROLES_OF_E1_AND_E2_ENZYMES	REACTOME_SYNTHESIS_OF_ACTIVE_UBIQUITIN_ROLES_OF_E1_AND_E2_ENZYMES	30	-0.363964	-1.07248	0.359833	0.787715	0.699548	8881	tags=70%	list=50%	signal=35%	Ube2l3/Ube2w/Usp9x/Ubb/Ube2h/Cdc34/Ube2d2a/Ube2q2/Usp5/Ube2k/Uba52/Ube2e3/Ube2e1/Ube2s/Uchl3/Ube2c/Ube2g2/Ube2d1/Otulin/Rps27a/Ube2t
REACTOME_TRANSPORT_OF_INORGANIC_CATIONS_ANIONS_AND_AMINO_ACIDS_OLIGOPEPTIDES	REACTOME_TRANSPORT_OF_INORGANIC_CATIONS_ANIONS_AND_AMINO_ACIDS_OLIGOPEPTIDES	106	-0.296918	-1.07273	0.34881	0.769947	0.683769	3136	tags=20%	list=18%	signal=16%	Slc7a11/Slc25a18/Slc1a6/Slc38a5/Slc15a2/Slc25a26/Slc17a1/Slc9a4/Slc20a2/Slc9a9/Slc26a1/Slc7a6/Slc15a3/Slc36a2/Slc1a2/Slc43a1/Slc6a15/Slc9a7/Slc17a6/Slc24a2/Slc17a7
REACTOME_FC_EPSILON_RECEPTOR_FCERI_SIGNALING	REACTOME_FC_EPSILON_RECEPTOR_FCERI_SIGNALING	118	-0.29329	-1.07478	0.348837	0.769947	0.683769	2139	tags=52%	list=12%	signal=46%	Plcg2/Calm1/Psmd9/Psmb4/Psma2/Psmf1/Psmc3/Bcl10/Ube2n/Nfkb1/Psmd5/Psmc1/Cdc34/Ube2d2a/Map2k7/Psme1/Calm3/Ikbkb/Ppp3ca/Tab3/Psmd13/Psmb10/Psma4/Rela/Uba52/Tab1/Psmb1/Psma8/Psmc4/Psmd4/Grb2/Plcg1/Psmb5/Psma6/Mapk1/Psmc5/Psmb6/Psmd10/Psme2/Psmb8/Syk/Fcer1g/Lcp2/Lyn/Skp1/Ube2d1/Nfatc2/Rps27a/Malt1/Nfatc1/Nfkbia/Psme2b/Grap2/Lat/Itk/Btk/Prkcq/Txk/Mapk10/Card11/Lat2
REACTOME_DNA_DAMAGE_TELOMERE_STRESS_INDUCED_SENESCENCE	REACTOME_DNA_DAMAGE_TELOMERE_STRESS_INDUCED_SENESCENCE	79	-0.308955	-1.07534	0.338631	0.764141	0.678613	1083	tags=11%	list=6%	signal=11%	H2bc8/Pot1a/H2ac7/H2bc23/H2ac23/H2bc24/H2ac6/H4c18/H2bc11
REACTOME_EPHRIN_SIGNALING	REACTOME_EPHRIN_SIGNALING	18	-0.413065	-1.07564	0.360347	0.787715	0.699548	2570	tags=33%	list=15%	signal=29%	Pak3/Ephb3/Ephb6/Fyn/Efnb3/Ephb1
REACTOME_HATS_ACETYLATE_HISTONES	REACTOME_HATS_ACETYLATE_HISTONES	69	-0.315583	-1.07643	0.34625	0.769947	0.683769	4866	tags=33%	list=27%	signal=24%	Wdr5/H2bc21/Jade2/H3c10/H4c9/H2bc15/Hat1/Kansl2/H3c4/H3c8/H4c12/H3c13/H2bc13/H4c6/H2bc22/H3c3/H2bc8/H3c6/H2bc23/H2bc24/H3c14/H4c18/H2bc11
REACTOME_NEUROTRANSMITTER_RECEPTORS_AND_POSTSYNAPTIC_SIGNAL_TRANSMISSION	REACTOME_NEUROTRANSMITTER_RECEPTORS_AND_POSTSYNAPTIC_SIGNAL_TRANSMISSION	131	-0.290095	-1.07733	0.336395	0.764141	0.678613	3101	tags=24%	list=17%	signal=20%	Lrrc7/Chrna2/Gabra4/Chrna6/Gabra2/Gabrr1/Gngt2/Gng10/Gabbr1/Gabrb1/Kcnj12/Rps6ka6/Chrna1/Gng2/Ncald/Gng11/Kcnj15/Grin3a/Camk2a/Grip2/Prkcb/Grip1/Dlg2/Akap5/Chrne/Cacng8/Gabrg3/Htr3a/Gabbr2/Prkar1b/Htr3b/Gabrb3
REACTOME_INTERLEUKIN_1_FAMILY_SIGNALING	REACTOME_INTERLEUKIN_1_FAMILY_SIGNALING	115	-0.296851	-1.0785	0.330588	0.75898	0.674029	6927	tags=43%	list=39%	signal=27%	Casp1/Nfkbib/Tab3/Psmd13/Psmb10/Psma4/Rela/Uba52/Usp14/Tab1/Psmb1/Psma8/Psmc4/Psmd4/Rbx1/Hmgb1/Psmb5/Psma6/Psmc5/Psmb6/Myd88/Traf2/Il18/Psmd10/Psme2/Psmb8/Il1rap/Il1b/Alpk1/Skp1/Il1r2/Il18r1/Il18bp/Il1rapl1/S100b/Peli3/Il1rn/Rps27a/Il1a/Gsdmd/Nfkbia/Nlrc5/Psme2b/Tnip2/Irak3/Nfkb2/Ager/Tifa/Map3k8/Map2k6
REACTOME_INWARDLY_RECTIFYING_K_CHANNELS	REACTOME_INWARDLY_RECTIFYING_K_CHANNELS	35	-0.356861	-1.07866	0.340192	0.764593	0.679015	2630	tags=29%	list=15%	signal=24%	Gngt2/Gng10/Gabbr1/Kcnj1/Kcnj12/Gng2/Gng11/Kcnj15/Gabbr2/Kcnj11
REACTOME_SUMOYLATION_OF_CHROMATIN_ORGANIZATION_PROTEINS	REACTOME_SUMOYLATION_OF_CHROMATIN_ORGANIZATION_PROTEINS	63	-0.322761	-1.08224	0.338422	0.764141	0.678613	6763	tags=48%	list=38%	signal=30%	Sumo1/Nup62/Ndc1/Nup153/Ring1/Sumo3/Nup35/Bmi1/Pom121/Phc3/Sumo2/Cbx8/Rnf2/Nup93/Nup214/Pcgf2/Nup85/Nup133/H4c9/Cbx4/L3mbtl2/Nup155/Nup107/H4c12/H4c6/Rae1/Cbx2/Satb1/Nup210/H4c18
REACTOME_SYNTHESIS_OF_PA	REACTOME_SYNTHESIS_OF_PA	33	-0.359737	-1.08502	0.34478	0.769947	0.683769	2340	tags=18%	list=13%	signal=16%	Lpcat4/Gpam/Pla2g2e/Pla2g2f/Lpcat1/Pld6
REACTOME_METABOLISM_OF_PORPHYRINS	REACTOME_METABOLISM_OF_PORPHYRINS	28	-0.371221	-1.08616	0.326816	0.75509	0.670575	3106	tags=21%	list=18%	signal=18%	Abcc1/Alad/Gsta1/Ugt1a5/Gsta2/Slco1b2
REACTOME_DNA_DAMAGE_RECOGNITION_IN_GG_NER	REACTOME_DNA_DAMAGE_RECOGNITION_IN_GG_NER	38	-0.354923	-1.08703	0.332421	0.75898	0.674029	8991	tags=68%	list=51%	signal=34%	Nfrkb/Actr8/Rad23a/Ddb1/Actr5/Actb/Ubb/Cops5/Tfpt/Actl6a/Ino80c/Ruvbl1/Xpc/Gps1/Ino80e/Uba52/Rbx1/Mcrs1/Cops8/Cops4/Ino80b/Cops7b/Ddb2/Cetn2/Rps27a/Parp1
REACTOME_METABOLISM_OF_STEROID_HORMONES	REACTOME_METABOLISM_OF_STEROID_HORMONES	30	-0.369038	-1.08744	0.331939	0.75898	0.674029	3732	tags=30%	list=21%	signal=24%	Hsd17b1/Akr1b8/Hsd17b11/Stard6/Hsd3b3/Tspoap1/Pomc/Serpina6/Hsd17b14
REACTOME_RAB_REGULATION_OF_TRAFFICKING	REACTOME_RAB_REGULATION_OF_TRAFFICKING	114	-0.300742	-1.09296	0.308962	0.739418	0.656657	3457	tags=17%	list=20%	signal=14%	Trappc4/Dennd3/Tbc1d17/Rab12/Tbc1d7/Rab39b/Als2cl/Rab3il1/Rab8b/Dennd1a/Rab3a/Rab32/Rinl/Dennd1c/Rab39/Rin3/Dennd4a/Tbc1d10c/Dennd4b
REACTOME_FCERI_MEDIATED_CA_2_MOBILIZATION	REACTOME_FCERI_MEDIATED_CA_2_MOBILIZATION	28	-0.374056	-1.09446	0.319832	0.745849	0.662369	3987	tags=39%	list=22%	signal=30%	Syk/Fcer1g/Lcp2/Lyn/Nfatc2/Nfatc1/Grap2/Lat/Itk/Btk/Txk
REACTOME_REGULATION_OF_PLK1_ACTIVITY_AT_G2_M_TRANSITION	REACTOME_REGULATION_OF_PLK1_ACTIVITY_AT_G2_M_TRANSITION	83	-0.312456	-1.09455	0.311436	0.741109	0.658159	7382	tags=46%	list=42%	signal=27%	Nek2/Nde1/Cep76/Dctn3/Ywhae/Cdk5rap2/Cep135/Tuba1a/Uba52/Ssna1/Cep70/Cep164/Cep43/Aurka/Cep57/Ofd1/Haus2/Bora/Tubb5/Cep290/Cep72/Tubg1/Skp1/Haus3/Cep63/Haus6/Cep192/Haus1/Ninl/Sdccag8/Cep250/Cetn2/Ajuba/Rps27a/Haus8/Haus5/Cep152/Ccp110
REACTOME_FCGAMMA_RECEPTOR_FCGR_DEPENDENT_PHAGOCYTOSIS	REACTOME_FCGAMMA_RECEPTOR_FCGR_DEPENDENT_PHAGOCYTOSIS	77	-0.315897	-1.09589	0.309202	0.739418	0.656657	4005	tags=21%	list=23%	signal=16%	Fcgr2b/Syk/Lyn/Plpp5/Wipf1/Elmo1/Myo9b/Fyn/Pld4/Nckap1l/Fgr/Cd247/Btk/Cyfip2/Myo5a/Cd3g
REACTOME_RAB_GEFS_EXCHANGE_GTP_FOR_GDP_ON_RABS	REACTOME_RAB_GEFS_EXCHANGE_GTP_FOR_GDP_ON_RABS	88	-0.312283	-1.0965	0.317402	0.745849	0.662369	3457	tags=18%	list=20%	signal=15%	Trappc4/Dennd3/Rab12/Rab39b/Als2cl/Rab3il1/Rab8b/Dennd1a/Rab3a/Rab32/Rinl/Dennd1c/Rab39/Rin3/Dennd4a/Dennd4b
REACTOME_MITOCHONDRIAL_CALCIUM_ION_TRANSPORT	REACTOME_MITOCHONDRIAL_CALCIUM_ION_TRANSPORT	16	-0.436035	-1.0977	0.340807	0.764593	0.679015	449	tags=56%	list=3%	signal=55%	Micu2/Spg7/Smdt1/Afg3l2/Parl/Pmpca/Stoml2/Slc8b1/Micu3
REACTOME_RAC1_GTPASE_CYCLE	REACTOME_RAC1_GTPASE_CYCLE	170	-0.287374	-1.0987	0.272018	0.690153	0.612907	2533	tags=23%	list=14%	signal=20%	Git2/Pak3/Lbr/Arap1/Ktn1/Iqgap3/Myo9b/Prex1/Tagap/Arhgap39/Pard6a/Arhgap22/Ncf2/Ncf4/Arhgap44/Ncf1/Noxo1/Arhgap30/Vrk2/Arhgap4/Cybb/Def6/Dock2/Dock11/Arhgap15/Nckap1l/Cyba/Arhgef6/Srgap3/Fmnl1/Arhgdib/Sh3bp1/Arhgap9/Cyfip2/Swap70/Arhgap25/Nhs/Dock10/Arhgap45
REACTOME_TRANSCRIPTIONAL_REGULATION_BY_RUNX2	REACTOME_TRANSCRIPTIONAL_REGULATION_BY_RUNX2	62	-0.328274	-1.1005	0.314249	0.742827	0.659684	8535	tags=58%	list=48%	signal=30%	Ppm1d/Psma7/Ubb/Psmd9/Ar/Psmb4/Psma2/Psmf1/Psmc3/Psmd5/Cdk1/Psmc1/Psme1/Psmd13/Psmb10/Psma4/Uba52/Psmb1/Psmc4/Psmd4/Rbx1/Psmb5/Cbfb/Psma6/Stub1/Psmc5/Psmb6/Smad4/Psmd10/Psme2/Cdk4/Psmb8/Ccnd1/Skp1/Rps27a/Psme2b
REACTOME_TRANSCRIPTIONAL_REGULATION_BY_SMALL_RNAS	REACTOME_TRANSCRIPTIONAL_REGULATION_BY_SMALL_RNAS	32	-0.365716	-1.10237	0.31479	0.742827	0.659684	7152	tags=47%	list=40%	signal=28%	Aaas/Ran/Nup62/Ndc1/Nup153/Nup35/Pom121/Nup93/Nup214/Nup85/Nup133/Nup155/Nup107/Rae1/Nup210
REACTOME_TRANSMISSION_ACROSS_CHEMICAL_SYNAPSES	REACTOME_TRANSMISSION_ACROSS_CHEMICAL_SYNAPSES	195	-0.28552	-1.10339	0.258206	0.675173	0.599603	3101	tags=22%	list=17%	signal=18%	Lrrc7/Chrna2/Gabra4/Slc1a6/Chrna6/Gabra2/Gabrr1/Gngt2/Cacna1e/Gng10/Gabbr1/Gabrb1/Kcnj12/Rps6ka6/Chrna1/Tspoap1/Gng2/Rab3a/Syn3/Ncald/Gng11/Kcnj15/Grin3a/Camk2a/Grip2/Prkcb/Grip1/Dlg2/Akap5/Slc1a2/Syt1/Chrne/Cacng8/Slc5a7/Gabrg3/Htr3a/Gabbr2/Prkar1b/Syn1/Htr3b/Cacnb4/Gabrb3/Slc17a7
REACTOME_ROLE_OF_PHOSPHOLIPIDS_IN_PHAGOCYTOSIS	REACTOME_ROLE_OF_PHOSPHOLIPIDS_IN_PHAGOCYTOSIS	20	-0.411651	-1.10508	0.312147	0.741109	0.658159	4005	tags=40%	list=23%	signal=31%	Plcg1/Prkce/Fcgr2b/Syk/Plpp5/Pld4/Cd247/Cd3g
REACTOME_MITOTIC_PROPHASE	REACTOME_MITOTIC_PROPHASE	126	-0.298941	-1.10759	0.280277	0.704332	0.625498	5502	tags=37%	list=31%	signal=25%	Mapk1/H3f3b/Nup93/Gorasp1/Nup214/Ncapg2/Ncaph2/H2ac15/H2bc21/Nup85/H2ac13/Banf1/Smc4/H3c10/Nup133/H2ax/H4c9/H2az2/H2bc15/Set/Nup155/H3c4/Mcph1/Nup107/H3c8/H4c12/Vrk1/H3c13/H2bc13/H4c6/H2bc22/H3c3/Rae1/Vrk2/H2bc8/Prkcb/H2ac7/H3c6/Nup210/H2bc23/H2ac23/H2bc24/H2ac6/H3c14/H4c18/H2bc11
REACTOME_POSITIVE_EPIGENETIC_REGULATION_OF_RRNA_EXPRESSION	REACTOME_POSITIVE_EPIGENETIC_REGULATION_OF_RRNA_EXPRESSION	27	-0.382718	-1.10784	0.302358	0.72905	0.647449	6849	tags=78%	list=39%	signal=48%	Sf3b1/Baz1b/Polr1b/Smarca5/Actb/Dek/Polr2f/Tbp/Polr1e/Polr2k/Polr2e/Taf1a/Polr2l/Polr1c/Kat2a/Mybbp1a/Polr1a/Taf1c/Ddx21/Polr2h/Taf1b
REACTOME_NEUROTRANSMITTER_RELEASE_CYCLE	REACTOME_NEUROTRANSMITTER_RELEASE_CYCLE	49	-0.345662	-1.11109	0.291074	0.712946	0.633148	1782	tags=16%	list=10%	signal=15%	Tspoap1/Rab3a/Syn3/Slc1a2/Syt1/Slc5a7/Syn1/Slc17a7
REACTOME_EPIGENETIC_REGULATION_OF_GENE_EXPRESSION	REACTOME_EPIGENETIC_REGULATION_OF_GENE_EXPRESSION	171	-0.290671	-1.11278	0.250557	0.664147	0.589811	5129	tags=47%	list=29%	signal=34%	Paxip1/Polr2f/Phf20/Zzz3/H2bc9/H2aj/Tbp/Kat14/Hcfc1/Polr1e/Rbbp7/Zfp97/Zfp960/H3f3a/Rbbp5/Zfp160/Zfp932/Mcrs1/Aebp2/Kmt2a/Ogt/H3f3b/Polr2k/Polr2e/Taf1a/Zfp872/Polr2l/Polr1c/H2ac15/Zfp382/Kat2a/Wdr5/H2bc21/H2ac13/H3c10/Dnmt1/Mybbp1a/H2ax/H4c9/H2az2/Polr1a/Rbbp4/H2bc15/Kansl2/Zfp975/Tada2a/Taf1c/H3c4/Zfp934/H3c8/Sgf29/Ddx21/Gm5141/H4c12/H3c13/Ash2l/Zfp53/Gm6871/H2bc13/H4c6/Zfp324/Polr2h/Dnmt3b/H2bc…
REACTOME_INTEGRIN_SIGNALING	REACTOME_INTEGRIN_SIGNALING	25	-0.393012	-1.11566	0.293223	0.715944	0.635811	1967	tags=24%	list=11%	signal=21%	Ptpn1/Rasgrp2/Fgb/Apbb1ip/Rasgrp1/Rapgef4
REACTOME_HEDGEHOG_LIGAND_BIOGENESIS	REACTOME_HEDGEHOG_LIGAND_BIOGENESIS	61	-0.334929	-1.11958	0.282636	0.705679	0.626694	8525	tags=57%	list=48%	signal=30%	Psma7/P4hb/Ubb/Syvn1/Psmd9/Psmb4/Psma2/Psmf1/Psmc3/Psmd5/Psmc1/Psme1/Psmd13/Psmb10/Psma4/Uba52/Psmb1/Psma8/Psmc4/Psmd4/Derl2/Psmb5/Psma6/Psmc5/Psmb6/Psmd10/Psme2/Psmb8/Shh/Disp2/Hhat/Rps27a/Psme2b/Notum/Dhh
REACTOME_GENE_SILENCING_BY_RNA	REACTOME_GENE_SILENCING_BY_RNA	40	-0.362154	-1.12354	0.289367	0.712946	0.633148	7152	tags=45%	list=40%	signal=27%	Aaas/Ran/Nup62/Ndc1/Nup153/Nup35/Pom121/Tsn/Nup93/Nup214/Nup85/Nup133/Nup155/Nup107/Rae1/Ago4/Ago1/Nup210
REACTOME_CYCLIN_D_ASSOCIATED_EVENTS_IN_G1	REACTOME_CYCLIN_D_ASSOCIATED_EVENTS_IN_G1	43	-0.35813	-1.12424	0.285525	0.708321	0.62904	6562	tags=49%	list=37%	signal=31%	Uba52/E2f1/Ppp2r1b/Rbl2/Cdk2/E2f5/Cdkn1c/Cdk4/Ppp2r3d/Cks1b/Ccnd1/Lyn/Skp1/Mnat1/Ccne1/Ccnh/E2f2/Rps27a/Ccnd3/E2f3/Ptk6
REACTOME_CLEC7A_DECTIN_1_SIGNALING	REACTOME_CLEC7A_DECTIN_1_SIGNALING	91	-0.319275	-1.12781	0.255501	0.672646	0.597359	8525	tags=59%	list=48%	signal=31%	Psma7/Nfatc3/Ubb/Plcg2/Calm1/Psmd9/Psmb4/Psma2/Psmf1/Casp8/Psmc3/Bcl10/Ube2n/Nfkb1/Psmd5/Psmc1/Cdc34/Ube2d2a/Psme1/Calm3/Relb/Ikbkb/Ppp3ca/Tab3/Psmd13/Psmb10/Psma4/Rela/Uba52/Tab1/Psmb1/Psma8/Psmc4/Psmd4/Psmb5/Psma6/Psmc5/Psmb6/Psmd10/Psme2/Psmb8/Pycard/Il1b/Skp1/Ube2d1/Map3k14/Nfatc2/Rps27a/Malt1/Nfatc1/Nfkbia/Psme2b/Nfkb2/Card11
REACTOME_APC_C_CDH1_MEDIATED_DEGRADATION_OF_CDC20_AND_OTHER_APC_C_CDH1_TARGETED_PROTEINS_IN_LATE_MITOSIS_EARLY_G1	REACTOME_APC_C_CDH1_MEDIATED_DEGRADATION_OF_CDC20_AND_OTHER_APC_C_CDH1_TARGETED_PROTEINS_IN_LATE_MITOSIS_EARLY_G1	72	-0.328045	-1.12848	0.268473	0.688073	0.611059	8347	tags=57%	list=47%	signal=30%	Ubb/Psmd9/Anapc11/Psmb4/Pttg1/Psma2/Psmf1/Psmc3/Anapc4/Anapc7/Psmd5/Psmc1/Psme1/Cdc23/Psmd13/Psmb10/Psma4/Uba52/Psmb1/Psma8/Psmc4/Psmd4/Ube2e1/Psmb5/Psma6/Aurka/Psmc5/Psmb6/Ube2s/Anapc16/Anapc10/Cdc26/Cdc20/Psmd10/Psme2/Psmb8/Ube2c/Ube2d1/Cdc16/Rps27a/Psme2b
REACTOME_THE_CANONICAL_RETINOID_CYCLE_IN_RODS_TWILIGHT_VISION	REACTOME_THE_CANONICAL_RETINOID_CYCLE_IN_RODS_TWILIGHT_VISION	18	-0.433434	-1.12868	0.298119	0.72561	0.644394	1280	tags=44%	list=7%	signal=41%	Hsd17b6/Rbp1/Rdh11/Rho/Stra6/Rdh12/Ttr/Rdh1
REACTOME_SUMOYLATION	REACTOME_SUMOYLATION	161	-0.298047	-1.13187	0.226457	0.630496	0.559927	6911	tags=46%	list=39%	signal=28%	Pcna/Nop58/Xpc/Sumo1/Nup62/Thra/Ndc1/Nup153/Rela/Ring1/Hnrnpk/Sumo3/Nup35/Smc5/Rnf168/Bmi1/Vhl/Park7/Sae1/Pom121/Phc3/Top2a/Mta1/Sumo2/Cbx8/Rnf2/Pgr/Npm1/Ctbp1/Nup93/Nsmce3/Hic1/Nsmce1/Pml/Nup214/Pcgf2/Incenp/Pias3/Nup85/Nsmce2/Dnmt1/Nup133/H4c9/Cbx4/L3mbtl2/Nup155/Nup107/Xrcc4/Rwdd2b/Trp53bp1/H4c12/Trim27/Mdc1/Ing2/H4c6/Nr5a1/Nr1h3/Dnmt3b/Brca1/Rae1/Sp100/Cetn2/Rpa1/Cbx2/Eid3/Nfkbia/Blm/Nfkb2/Sa…
REACTOME_SIGNALING_BY_INTERLEUKINS	REACTOME_SIGNALING_BY_INTERLEUKINS	274	-0.287547	-1.13227	0.189968	0.590474	0.524384	5766	tags=34%	list=33%	signal=23%	Hmgb1/Psmb5/Sdc1/Ptk2b/Psma6/Stat2/Vrk3/Mapk1/Vamp2/Cntfr/Psmc5/Psmb6/Il4ra/Snap25/Il10/Myd88/Csf2rb/Il15ra/Traf2/Il18/Ptpn6/Psmd10/Psme2/Psmb8/Il12b/Il4/Il1rap/H3c10/Ctf1/Rapgef1/Il1b/Syk/Stat5b/Lyn/H3c4/Socs1/Alpk1/Skp1/Il1r2/Inpp5d/H3c8/Txlna/Il18r1/H3c13/Dusp7/Il18bp/Il1rapl1/S100b/Peli3/Il2rb/Il1rn/H3c3/Cd4/Rps27a/Socs3/Il1a/Il9r/Il12a/Rps6ka5/Fyn/Ripk2/Il21/Csf1/Il10ra/Nod1/Il27ra/Gsdmd/Nfk…
REACTOME_RNA_POLYMERASE_II_PRE_TRANSCRIPTION_EVENTS	REACTOME_RNA_POLYMERASE_II_PRE_TRANSCRIPTION_EVENTS	77	-0.327165	-1.13498	0.262577	0.680824	0.604622	8431	tags=57%	list=48%	signal=30%	Gtf2e1/Ak6/Ercc2/Supt5/Leo1/Taf1/Ccnk/Polr2c/Tcea1/Polr2i/Nelfb/Eaf2/Polr2b/Eloc/Cdk7/Gtf2e2/Taf13/Polr2f/Taf9/Elob/Tbp/Nelfcd/Taf6/Polr2k/Polr2e/Supt4a/Polr2l/Supt16/Gtf2h4/Taf10/Nelfe/Taf11/Cdk9/Taf9b/Ssrp1/Gtf2h3/Taf7/Mnat1/Taf15/Ccnh/Polr2d/Polr2g/Polr2h/Taf5
REACTOME_NEDDYLATION	REACTOME_NEDDYLATION	220	-0.292316	-1.13715	0.190476	0.590474	0.524384	6731	tags=38%	list=38%	signal=24%	Fbxl15/Gps1/Psmd13/Psmb10/Psma4/Ccnf/Uba52/Elob/Fbxo22/Psmb1/Fbxo40/Psma8/Rbbp7/Psmc4/Kbtbd8/Psmd4/Dcaf5/Vhl/Rbx1/Commd7/Fbxl19/Rbbp5/Dcaf7/Psmb5/Asb7/Psma6/Commd1/Dcaf8/Psmc5/Fbxo7/Psmb6/Cops8/Rnf7/Dtl/Dcun1d2/Btbd6/Cops4/Psmd10/Wdr5/Nedd8/Psme2/Psmb8/Uchl3/Fbxo41/Ccdc22/Asb8/Fbxw9/Klhl25/Commd3/Commd4/Commd6/Ercc8/Spsb3/Fbxw17/Commd2/Klhl11/Senp8/Skp1/Fbxo32/Asb11/Fbxw7/Cops7b/Fbxl21/Ddb2/Ube2d…
REACTOME_P75NTR_SIGNALS_VIA_NF_KB	REACTOME_P75NTR_SIGNALS_VIA_NF_KB	16	-0.452883	-1.14012	0.301943	0.72905	0.647449	2076	tags=81%	list=12%	signal=72%	Ngf/Irak1/Ubb/Nfkb1/Ikbkb/Prkci/Rela/Uba52/Myd88/Rps27a/Ripk2/Nfkbia/Ngfr
REACTOME_REGULATION_OF_ENDOGENOUS_RETROELEMENTS	REACTOME_REGULATION_OF_ENDOGENOUS_RETROELEMENTS	94	-0.320554	-1.14012	0.24	0.645	0.572807	5077	tags=37%	list=29%	signal=27%	Zfp872/H2ac15/Zfp382/H2bc21/H2ac13/H3c10/H2ax/H4c9/H2az2/H2bc15/Zfp975/H3c4/Zfp934/H3c8/Gm5141/H4c12/H3c13/Zfp53/Gm6871/H2bc13/H4c6/Zfp324/H2bc22/H3c3/H2bc8/H2ac7/H3c6/H2bc23/H2ac23/H2bc24/H2ac6/H3c14/Gm4767/H4c18/H2bc11
REACTOME_GLUCURONIDATION	REACTOME_GLUCURONIDATION	20	-0.42485	-1.14052	0.272599	0.690153	0.612907	1529	tags=45%	list=9%	signal=41%	Ugt1a1/Ugt1a9/Ugt2a3/Ugt2b5/Ugt2b1/Ugt1a5/Ugt2a1/Ugt1a6a/Ugt1a8
REACTOME_PROCESSING_OF_CAPPED_INTRONLESS_PRE_MRNA	REACTOME_PROCESSING_OF_CAPPED_INTRONLESS_PRE_MRNA	29	-0.388482	-1.14176	0.273361	0.690153	0.612907	8824	tags=69%	list=50%	signal=35%	Ncbp2/Ncbp1/Pcf11/Cstf2t/Cpsf6/Nudt21/Snrpd3/Clp1/Zfp473/Snrpe/Cpsf3/Cpsf7/Lsm10/Fip1l1/Snrpb/Slbp/Snrpf/Cpsf4/Lsm11/Pabpn1
REACTOME_JNK_C_JUN_KINASES_PHOSPHORYLATION_AND_ACTIVATION_MEDIATED_BY_ACTIVATED_HUMAN_TAK1	REACTOME_JNK_C_JUN_KINASES_PHOSPHORYLATION_AND_ACTIVATION_MEDIATED_BY_ACTIVATED_HUMAN_TAK1	22	-0.415551	-1.14198	0.273743	0.690153	0.612907	2076	tags=18%	list=12%	signal=16%	Rps27a/Ripk2/Nod1/Mapk10
REACTOME_SEROTONIN_NEUROTRANSMITTER_RELEASE_CYCLE	REACTOME_SEROTONIN_NEUROTRANSMITTER_RELEASE_CYCLE	18	-0.439745	-1.14512	0.283647	0.705925	0.626913	1782	tags=56%	list=10%	signal=50%	Vamp2/Snap25/Cplx1/Syn2/Ppfia4/Tspoap1/Rab3a/Syn3/Syt1/Syn1
REACTOME_MITOTIC_G2_G2_M_PHASES	REACTOME_MITOTIC_G2_G2_M_PHASES	180	-0.297943	-1.14529	0.197572	0.595034	0.528433	7284	tags=44%	list=41%	signal=26%	Nde1/Psme1/Cep76/Cdk7/Dctn3/Ywhae/Cdk5rap2/Cdc25c/Foxm1/Cep135/Pkmyt1/Gtse1/Tuba1a/Psmd13/Hmmr/Psmb10/Nme7/Psma4/Uba52/Ssna1/E2f1/Psmb1/Psma8/Cep70/Psmc4/Psmd4/Rbx1/Ppp2r1b/Cep164/Cep43/Psmb5/Psma6/Aurka/Psmc5/Cep57/Ofd1/Psmb6/Cdk2/Haus2/Tubb3/Bora/Psmd10/Tubb5/Psme2/Psmb8/Ccna1/Cep290/Ppp2r3d/Tuba1b/Trp53/Cep72/Tubg1/Mzt2/Skp1/Haus3/Cep63/Mnat1/Haus6/Cep192/Ccnh/Haus1/Ninl/Sdccag8/Cdc25b/Cep250/…
REACTOME_ORGANELLE_BIOGENESIS_AND_MAINTENANCE	REACTOME_ORGANELLE_BIOGENESIS_AND_MAINTENANCE	184	-0.29771	-1.14717	0.197152	0.595034	0.528433	5491	tags=30%	list=31%	signal=21%	Cep57/Ofd1/Ift46/Ttbk2/Haus2/Tmem67/Tubb3/Fbf1/Tubb5/C2cd3/Rpgrip1l/Cep290/Tuba1b/Bbs9/Ift27/Bbs2/Cep72/Nphp4/Tubg1/Haus3/Cep63/Ift57/Haus6/Cep192/Haus1/Ninl/Dync2h1/Sdccag8/Kif3a/Cc2d2a/Cep250/Cetn2/Tubb1/Haus8/Wdr35/Mks1/Haus5/Hdac6/Wdr19/Kif17/Tubb2b/Arl6/Ift80/Tctn3/Cep152/Kif3c/Ccp110/Rho/Bbs5/Cep97/Iqcb1/Ahi1/Tuba8/Kif24/Bbs1
REACTOME_STIMULI_SENSING_CHANNELS	REACTOME_STIMULI_SENSING_CHANNELS	91	-0.324931	-1.14779	0.229829	0.631897	0.56117	2325	tags=20%	list=13%	signal=17%	Trpc1/Trpa1/Rps27a/Trpc3/Unc80/Asic5/Trpc4/Ryr1/Trpm2/Trpv4/Ano2/Best1/Trdn/Stom/Trpm3/Ano5/Trpm6/Nalcn
REACTOME_RESOLUTION_OF_SISTER_CHROMATID_COHESION	REACTOME_RESOLUTION_OF_SISTER_CHROMATID_COHESION	120	-0.313309	-1.15064	0.217593	0.614236	0.545486	5890	tags=34%	list=33%	signal=23%	Cdca5/Mad2l1/Zw10/Cenpp/Ndc80/Pmf1/Ppp2r5c/Cdc20/Zwint/Tubb3/Incenp/Spc24/Nup85/Cenpe/Cenph/Ercc6l/Nup133/Tuba1b/Kif2c/Rcc2/Nup107/Cenpm/Nuf2/Clasp2/Cenpq/Cenpl/Itgb3bp/Nsl1/Pds5b/Cenps/Kntc1/Tubb1/Cenpi/Dsn1/Cenpo/Tubb2b/Rps27/Ska1/Kif18a/Cenpn/Tuba8
REACTOME_ALPHA_DEFENSINS	REACTOME_ALPHA_DEFENSINS	30	-0.391686	-1.15417	0.249651	0.664021	0.589699	5545	tags=47%	list=31%	signal=32%	Defa20/Defa43/Defa37/Defa5/Defa36/Defa42/Defa41/Defa29/Defa34/Defa35/Defa21/Defa22/Cd4/Defa32
REACTOME_MYOGENESIS	REACTOME_MYOGENESIS	19	-0.438008	-1.15639	0.265896	0.683732	0.607204	5820	tags=47%	list=33%	signal=32%	Tcf4/Cdon/Ctnna2/Mapk12/Cdh4/Tcf3/Mef2b/Mapk11/Mef2c
REACTOME_TRANSLESION_SYNTHESIS_BY_POLH	REACTOME_TRANSLESION_SYNTHESIS_BY_POLH	19	-0.438787	-1.15845	0.263006	0.680824	0.604622	6911	tags=58%	list=39%	signal=35%	Pcna/Rfc5/Uba52/Rfc1/Polh/Rfc2/Rpa2/Rfc4/Rps27a/Rpa1/Rfc3
REACTOME_SENESCENCE_ASSOCIATED_SECRETORY_PHENOTYPE_SASP	REACTOME_SENESCENCE_ASSOCIATED_SECRETORY_PHENOTYPE_SASP	39	-0.37524	-1.1596	0.241892	0.647835	0.575325	8347	tags=59%	list=47%	signal=31%	Ubb/Anapc11/Anapc4/Anapc7/Cdk6/Ehmt1/Cdc23/Uba52/Ube2e1/Mapk1/Cdk2/Ube2s/Anapc16/Anapc10/Ehmt2/Cdc26/Cdk4/Ccna1/Ube2c/Cebpb/Ube2d1/Cdc16/Rps27a
REACTOME_REGULATION_OF_TP53_ACTIVITY_THROUGH_ACETYLATION	REACTOME_REGULATION_OF_TP53_ACTIVITY_THROUGH_ACETYLATION	29	-0.39616	-1.16432	0.25802	0.675173	0.599603	6753	tags=62%	list=38%	signal=38%	Mta2/Ing5/Pin1/Pip4p1/Rbbp7/Gatad2a/Brd7/Pml/Meaf6/Akt3/Chd4/Rbbp4/Trp53/Mbd3/Ing2/Pip4k2b/Pip4k2a/Map2k6
REACTOME_GLUTAMATE_NEUROTRANSMITTER_RELEASE_CYCLE	REACTOME_GLUTAMATE_NEUROTRANSMITTER_RELEASE_CYCLE	24	-0.413768	-1.16474	0.236111	0.639934	0.568308	3212	tags=29%	list=18%	signal=24%	Ppfia4/Slc1a6/Tspoap1/Rab3a/Slc1a2/Syt1/Slc17a7
REACTOME_RECRUITMENT_OF_NUMA_TO_MITOTIC_CENTROSOMES	REACTOME_RECRUITMENT_OF_NUMA_TO_MITOTIC_CENTROSOMES	87	-0.331156	-1.16492	0.215758	0.611708	0.543242	7537	tags=48%	list=43%	signal=28%	Cdk1/Numa1/Nek2/Nde1/Cep76/Dctn3/Ywhae/Cdk5rap2/Cep135/Tuba1a/Nme7/Ssna1/Cep70/Cep164/Cep43/Cep57/Ofd1/Haus2/Tubb3/Tubb5/Cep290/Tuba1b/Cep72/Tubg1/Mzt2/Haus3/Cep63/Haus6/Cep192/Haus1/Ninl/Sdccag8/Cep250/Tubgcp2/Cetn2/Tubb1/Haus8/Haus5/Tubb2b/Cep152/Ccp110/Tuba8
REACTOME_ACTIVATION_OF_NF_KAPPAB_IN_B_CELLS	REACTOME_ACTIVATION_OF_NF_KAPPAB_IN_B_CELLS	62	-0.348934	-1.16976	0.21374	0.610462	0.542134	8347	tags=60%	list=47%	signal=32%	Ubb/Psmd9/Psmb4/Psma2/Psmf1/Psmc3/Bcl10/Nfkb1/Psmd5/Psmc1/Psme1/Ikbkb/Nfkbib/Psmd13/Psmb10/Psma4/Rela/Uba52/Psmb1/Psma8/Psmc4/Psmd4/Psmb5/Psma6/Psmc5/Psmb6/Psmd10/Psme2/Psmb8/Skp1/Rel/Rps27a/Malt1/Nfkbia/Psme2b/Prkcb/Card11
REACTOME_ESTROGEN_DEPENDENT_GENE_EXPRESSION	REACTOME_ESTROGEN_DEPENDENT_GENE_EXPRESSION	87	-0.333438	-1.17295	0.197576	0.595034	0.528433	3807	tags=24%	list=21%	signal=19%	Cdk9/H3c4/H3c8/H4c12/H3c13/Prmt1/H2bc13/H4c6/Polr2d/Polr2g/Polr2h/H2bc22/H3c3/H2bc8/H3c6/H2bc23/H2bc24/H3c14/H4c18/Cited1/H2bc11
REACTOME_PEPTIDE_LIGAND_BINDING_RECEPTORS	REACTOME_PEPTIDE_LIGAND_BINDING_RECEPTORS	167	-0.307143	-1.17454	0.161863	0.556807	0.494485	2739	tags=33%	list=15%	signal=28%	Npffr2/Npy5r/Oxt/Ppy/Prlh/Rln3/Rxfp3/Uts2/Ccl21a/Oprk1/Ccr3/Prlhr/Uts2b/Cck/Sstr1/Cort/Cx3cr1/Fpr2/Ccl5/F2rl2/F2/Hebp1/Pomc/Cxcr2/Oxtr/Tac1/Pyy/Ece2/Cxcl12/Ccl6/Ccl9/Npy1r/Ccl20/Cxcl9/Sst/Ccl19/Cxcl10/Cxcr4/Cxcl16/Gpr37/Cxcr5/Ccr10/Cxcl5/Gper1/Ntsr1/Ccr7/Cxcl13/Ccr6/Cxcr6/Ccl1/Xcl1/Cxcl1/Ccl4/Oprd1/Ccr4
REACTOME_APC_C_CDC20_MEDIATED_DEGRADATION_OF_CYCLIN_B	REACTOME_APC_C_CDC20_MEDIATED_DEGRADATION_OF_CYCLIN_B	24	-0.417637	-1.17564	0.222222	0.623188	0.553437	8347	tags=71%	list=47%	signal=38%	Ubb/Anapc11/Anapc4/Anapc7/Cdk1/Cdc23/Uba52/Ube2e1/Ube2s/Anapc16/Anapc10/Cdc26/Cdc20/Ube2c/Ube2d1/Cdc16/Rps27a
REACTOME_SCF_SKP2_MEDIATED_DEGRADATION_OF_P27_P21	REACTOME_SCF_SKP2_MEDIATED_DEGRADATION_OF_P27_P21	59	-0.354262	-1.18027	0.20354	0.598227	0.531269	8347	tags=56%	list=47%	signal=30%	Ubb/Psmd9/Psmb4/Psma2/Psmf1/Psmc3/Psmd5/Psmc1/Psme1/Psmd13/Psmb10/Psma4/Uba52/Psmb1/Psmc4/Psmd4/Psmb5/Psma6/Psmc5/Psmb6/Cdk2/Psmd10/Psme2/Cdk4/Psmb8/Ccna1/Cks1b/Ccnd1/Skp1/Ccne1/Rps27a/Psme2b/Ptk6
REACTOME_INTERLEUKIN_1_SIGNALING	REACTOME_INTERLEUKIN_1_SIGNALING	102	-0.328623	-1.18127	0.177804	0.57104	0.507125	8525	tags=61%	list=48%	signal=32%	Psma7/Irak1/Map3k3/Ubb/Psmd9/Psmb4/Nkiras1/Psma2/Psmf1/Casp8/Psmc3/Ube2n/Nfkb1/Irak2/Psmd5/Psmc1/Psme1/Ikbkb/Nfkbib/Tab3/Psmd13/Psmb10/Psma4/Rela/Uba52/Usp14/Tab1/Psmb1/Psma8/Psmc4/Psmd4/Rbx1/Hmgb1/Psmb5/Psma6/Psmc5/Psmb6/Myd88/Traf2/Psmd10/Psme2/Psmb8/Il1rap/Il1b/Alpk1/Skp1/Il1r2/S100b/Peli3/Il1rn/Rps27a/Il1a/Nfkbia/Nlrc5/Psme2b/Tnip2/Irak3/Nfkb2/Ager/Tifa/Map3k8/Map2k6
REACTOME_METABOLISM_OF_STEROIDS	REACTOME_METABOLISM_OF_STEROIDS	107	-0.326921	-1.18292	0.175915	0.567326	0.503827	5438	tags=33%	list=31%	signal=23%	Stard5/Cyp39a1/Fdft1/Fdxr/Cyp51/Acot8/Plpp6/Lss/Idi1/Akr1b7/Mvd/Ch25h/Acat2/Hsd17b1/Lbr/Abcc3/Baat/Akr1b8/Slc27a2/Abcb11/Slco1a4/Hsd17b11/Hsd17b7/Arv1/Mvk/Stard6/Hsd3b3/Slc27a5/Tspoap1/Pomc/Acox2/Cyp46a1/Serpina6/Hsd17b14/Slco1b2
REACTOME_TOLL_LIKE_RECEPTOR_4_TLR4_CASCADE	REACTOME_TOLL_LIKE_RECEPTOR_4_TLR4_CASCADE	116	-0.324733	-1.18398	0.165299	0.558635	0.496109	3612	tags=23%	list=20%	signal=19%	Alpk1/Skp1/Irf7/Cd14/Dusp7/Ube2d1/Birc3/S100b/Peli3/Rps27a/Itgb2/Rps6ka5/Ripk2/Nod1/Nfkbia/Nlrc5/Mapk11/Tnip2/Nfkb2/Cd180/Ager/Ly86/Tifa/Map3k8/Map2k6/Sarm1/Mapk10
REACTOME_CONDENSATION_OF_PROPHASE_CHROMOSOMES	REACTOME_CONDENSATION_OF_PROPHASE_CHROMOSOMES	71	-0.345533	-1.18543	0.201733	0.598227	0.531269	5202	tags=44%	list=29%	signal=31%	Ncapg2/Ncaph2/H2ac15/H2bc21/H2ac13/Smc4/H3c10/H2ax/H4c9/H2az2/H2bc15/Set/H3c4/Mcph1/H3c8/H4c12/H3c13/H2bc13/H4c6/H2bc22/H3c3/H2bc8/H2ac7/H3c6/H2bc23/H2ac23/H2bc24/H2ac6/H3c14/H4c18/H2bc11
REACTOME_APC_C_MEDIATED_DEGRADATION_OF_CELL_CYCLE_PROTEINS	REACTOME_APC_C_MEDIATED_DEGRADATION_OF_CELL_CYCLE_PROTEINS	85	-0.338083	-1.1855	0.194175	0.593088	0.526705	8525	tags=60%	list=48%	signal=31%	Psma7/Bub3/Ubb/Psmd9/Anapc11/Psmb4/Pttg1/Psma2/Psmf1/Psmc3/Anapc4/Anapc7/Bub1b/Psmd5/Cdk1/Psmc1/Nek2/Psme1/Cdc23/Psmd13/Psmb10/Psma4/Uba52/Psmb1/Psma8/Psmc4/Psmd4/Ube2e1/Fbxo5/Mad2l1/Psmb5/Psma6/Aurka/Psmc5/Psmb6/Cdk2/Ube2s/Anapc16/Anapc10/Cdc26/Cdc20/Psmd10/Psme2/Psmb8/Ccna1/Ube2c/Skp1/Ube2d1/Cdc16/Rps27a/Psme2b
REACTOME_BILE_ACID_AND_BILE_SALT_METABOLISM	REACTOME_BILE_ACID_AND_BILE_SALT_METABOLISM	39	-0.383933	-1.18647	0.208108	0.60328	0.535756	3550	tags=41%	list=20%	signal=33%	Osbpl7/Slc51b/Amacr/Stard5/Cyp39a1/Acot8/Ch25h/Abcc3/Baat/Slc27a2/Abcb11/Slco1a4/Slc27a5/Acox2/Cyp46a1/Slco1b2
REACTOME_FGFR2_ALTERNATIVE_SPLICING	REACTOME_FGFR2_ALTERNATIVE_SPLICING	17	-0.462197	-1.18776	0.236496	0.639934	0.568308	7944	tags=71%	list=45%	signal=39%	Polr2c/Polr2i/Ptbp1/Polr2b/Polr2f/Polr2k/Polr2e/Polr2l/Polr2d/Polr2g/Polr2h/Hnrnpa1
REACTOME_M_PHASE	REACTOME_M_PHASE	390	-0.294495	-1.18803	0.0878099	0.425419	0.377803	6816	tags=42%	list=38%	signal=26%	Cdc23/Chmp6/Sumo1/Nup62/Cep135/Ndc1/Tuba1a/Nup153/H2bc9/Psmd13/Psmb10/Nme7/H2aj/Psma4/Uba52/Lmnb1/Ssna1/Smc2/Nup35/Psmb1/Psma8/Cep70/Arpp19/Psmc4/Hdac8/Psmd4/Ube2e1/H3f3a/Ppp2r1b/Cep164/Cep43/Ncaph/Fbxo5/Cdca5/Mad2l1/Zw10/Pom121/Psmb5/Psma6/Cenpp/Mapk1/Psmc5/Ndc80/H3f3b/Cep57/Ofd1/Nup93/Ncapd2/Psmb6/Pmf1/Gorasp1/Ube2s/Anapc16/Rcc1/Anapc10/Chmp2a/Nup214/Ppp2r5c/Cdc26/Haus2/Ncapg2/Espl1/Cdc20/Zwint…
REACTOME_RUNX1_REGULATES_GENES_INVOLVED_IN_MEGAKARYOCYTE_DIFFERENTIATION_AND_PLATELET_FUNCTION	REACTOME_RUNX1_REGULATES_GENES_INVOLVED_IN_MEGAKARYOCYTE_DIFFERENTIATION_AND_PLATELET_FUNCTION	77	-0.342889	-1.18953	0.2	0.597683	0.530786	5014	tags=40%	list=28%	signal=29%	H2ac15/Wdr5/H2bc21/H2ac13/H3c10/H2ax/H4c9/H2az2/H2bc15/Zfpm1/H3c4/H3c8/H4c12/H3c13/Ash2l/Prmt1/H2bc13/H4c6/H2bc22/H3c3/Prmt6/H2bc8/H2ac7/H3c6/H2bc23/H2ac23/H2bc24/H2ac6/H3c14/H4c18/H2bc11
REACTOME_SIGNALING_BY_ROBO_RECEPTORS	REACTOME_SIGNALING_BY_ROBO_RECEPTORS	20	-0.443361	-1.19021	0.230226	0.631897	0.56117	3205	tags=30%	list=18%	signal=25%	Myo9b/Rps27a/Cxcl12/Pfn2/Cxcr4/Evl
REACTOME_POSTMITOTIC_NUCLEAR_PORE_COMPLEX_NPC_REFORMATION	REACTOME_POSTMITOTIC_NUCLEAR_PORE_COMPLEX_NPC_REFORMATION	22	-0.433987	-1.19264	0.23324	0.635662	0.564514	8623	tags=68%	list=49%	signal=35%	Nup188/Ahctf1/Rangap1/Seh1l/Ran/Sumo1/Ndc1/Nup35/Pom121/Nup93/Rcc1/Nup85/Nup133/Nup155/Nup107
REACTOME_POST_TRANSLATIONAL_MODIFICATION_SYNTHESIS_OF_GPI_ANCHORED_PROTEINS	REACTOME_POST_TRANSLATIONAL_MODIFICATION_SYNTHESIS_OF_GPI_ANCHORED_PROTEINS	81	-0.342072	-1.19493	0.192918	0.593088	0.526705	3068	tags=28%	list=17%	signal=24%	Pigm/Nrn1/Lypd3/Tecta/Otoa/Msln/Gpld1/Dpm1/Prss41/Reck/Gp2/Pigz/Psg18/Ly6d/Plaur/Plet1/Meltf/Cd52/Ly6e/Izumo1r/Thy1/Mdga1/Ly6h
REACTOME_NEURONAL_SYSTEM	REACTOME_NEURONAL_SYSTEM	312	-0.300189	-1.19553	0.0866808	0.425419	0.377803	3393	tags=24%	list=19%	signal=20%	Kcnk16/Nlgn1/Dlgap1/Chrna4/Homer3/Ppfia4/Kcnab1/Lrrc7/Chrna2/Gabra4/Slc1a6/Chrna6/Gabra2/Il1rapl1/Gabrr1/Gngt2/Cacna1e/Kcnv2/Gng10/Gabbr1/Homer2/Nrxn2/Kcnj1/Gabrb1/Dlgap2/Kcnj12/Rps6ka6/Chrna1/Tspoap1/Gng2/Kcnab2/Rab3a/Syn3/Ncald/Gng11/Kcnj15/Grin3a/Kcnq5/Kcng3/Camk2a/Kcna3/Grip2/Prkcb/Grip1/Shank1/Dlg2/Akap5/Slc1a2/Kcnn1/Syt1/Chrne/Kcnc3/Kcns1/Cacng8/Gjd2/Slc5a7/Gabrg3/Htr3a/Grm5/Gabbr2/Prkar1b/…
REACTOME_C_TYPE_LECTIN_RECEPTORS_CLRS	REACTOME_C_TYPE_LECTIN_RECEPTORS_CLRS	110	-0.330751	-1.19952	0.145882	0.513241	0.455795	8261	tags=56%	list=47%	signal=30%	Plcg2/Calm1/Psmd9/Psmb4/Psma2/Psmf1/Casp8/Psmc3/Bcl10/Ube2n/Nfkb1/Psmd5/Psmc1/Cdc34/Clec4n/Ube2d2a/Psme1/Calm3/Clec4e/Relb/Ikbkb/Ppp3ca/Tab3/Psmd13/Psmb10/Psma4/Rela/Uba52/Tab1/Psmb1/Psma8/Psmc4/Psmd4/Psmb5/Psma6/Psmc5/Psmb6/Prkacb/Psmd10/Psme2/Psmb8/Pycard/Il1b/Syk/Fcer1g/Pak3/Lyn/Skp1/Ube2d1/Icam2/Map3k14/Nfatc2/Rps27a/Malt1/Nfatc1/Rps6ka5/Fyn/Nfkbia/Psme2b/Nfkb2/Clec4d/Card11
REACTOME_MITF_M_DEPENDENT_GENE_EXPRESSION	REACTOME_MITF_M_DEPENDENT_GENE_EXPRESSION	16	-0.476742	-1.20018	0.218236	0.614236	0.545486	571	tags=19%	list=3%	signal=18%	Myo5a/Tcf7/Mitf
REACTOME_TRANSLESION_SYNTHESIS_BY_POLK	REACTOME_TRANSLESION_SYNTHESIS_BY_POLK	17	-0.467976	-1.20261	0.229197	0.631897	0.56117	6911	tags=65%	list=39%	signal=40%	Pcna/Rfc5/Uba52/Rfc1/Rfc2/Rpa2/Mad2l2/Rfc4/Rps27a/Rpa1/Rfc3
REACTOME_SEPARATION_OF_SISTER_CHROMATIDS	REACTOME_SEPARATION_OF_SISTER_CHROMATIDS	183	-0.312907	-1.20396	0.116612	0.496154	0.440621	8525	tags=57%	list=48%	signal=30%	Psma7/Bub3/Nudc/Spdl1/Mapre1/Ubb/Ahctf1/Bub1/Psmd9/Anapc11/Psmb4/Pttg1/Psma2/Psmf1/Cenpt/Psmc3/Anapc4/Xpo1/Anapc7/Zwilch/Bub1b/Psmd5/Rangap1/Seh1l/Psmc1/Mad1l1/Smc1a/Smc3/Nde1/Psme1/Ppp2r5d/Stag1/Ppp1cc/Cdc23/Tuba1a/Psmd13/Psmb10/Psma4/Uba52/Psmb1/Psma8/Psmc4/Hdac8/Psmd4/Ube2e1/Ppp2r1b/Cdca5/Mad2l1/Zw10/Psmb5/Psma6/Cenpp/Psmc5/Ndc80/Psmb6/Pmf1/Ube2s/Anapc16/Anapc10/Ppp2r5c/Cdc26/Espl1/Cdc20/Zwint…
REACTOME_INTERLEUKIN_7_SIGNALING	REACTOME_INTERLEUKIN_7_SIGNALING	25	-0.424513	-1.20508	0.204703	0.598227	0.531269	3891	tags=40%	list=22%	signal=31%	Stat5b/H3c4/H3c8/H3c13/H3c3/Il7r/Il2rg/H3c6/Stat5a/H3c14
REACTOME_RNA_POLYMERASE_II_TRANSCRIBES_SNRNA_GENES	REACTOME_RNA_POLYMERASE_II_TRANSCRIBES_SNRNA_GENES	73	-0.34983	-1.2064	0.185961	0.590474	0.524384	9453	tags=73%	list=53%	signal=34%	Rprd1b/Ssu72/Ints9/Ints1/Ice2/Ncbp2/Gtf2a1/Rprd1a/Pou2f1/Ints13/Ncbp1/Pcf11/Gtf2a2/Rpap2/Gtf2e1/Ak6/Supt5/Ccnk/Polr2c/Rprd2/Polr2i/Taf8/Polr2b/Cdk7/Gtf2e2/Taf13/Polr2f/Nabp2/Taf9/Tbp/Ints14/Snapc5/Taf6/Ints2/Ints4/Polr2k/Polr2e/Srrt/Supt4a/Polr2l/Ice1/Nabp1/Taf11/Cdk9/Snapc2/Polr2d/Polr2g/Polr2h/Taf5/Ell3/Ints7/Snapc4/Pou2f2
REACTOME_SIGNALING_BY_RETINOIC_ACID	REACTOME_SIGNALING_BY_RETINOIC_ACID	41	-0.388171	-1.2078	0.194631	0.593088	0.526705	1676	tags=17%	list=9%	signal=15%	Fabp5/Pdk4/Crabp2/Adh4/Rdh1/Crabp1/Sdr16c5
REACTOME_REGULATION_OF_TP53_ACTIVITY	REACTOME_REGULATION_OF_TP53_ACTIVITY	154	-0.320501	-1.2086	0.134009	0.497034	0.441403	6760	tags=47%	list=38%	signal=30%	Phf20/Ing5/Pin1/Rfc5/Pip4p1/Taf9/Rad50/Uba52/Tbp/Rbbp7/Ppp2r1b/Prkag1/Gatad2a/Taf6/Rad17/Brip1/Kat5/Brd7/Aurka/Trp53inp1/Pou4f1/Cdk2/Rnf34/Pml/Meaf6/Ehmt2/Rfc2/Ppp2r5c/Supt16/Akt3/Taf10/Chek2/Prmt5/Chd4/Ccna1/Prkag3/Taf11/Rbbp4/Rmi1/Stk11/Noc2l/Chek1/Top3a/Trp53/Rhno1/Mbd3/Taf9b/Ssrp1/Atm/Taf7/Rpa2/Taf15/Topbp1/Ing2/Pip4k2b/Brca1/Rfc4/Rps27a/Taf5/Bard1/Dna2/Rpa1/Pip4k2a/Ttc5/Trp63/Atrip/Rad9a/Map…
REACTOME_PRC2_METHYLATES_HISTONES_AND_DNA	REACTOME_PRC2_METHYLATES_HISTONES_AND_DNA	72	-0.352165	-1.21145	0.173645	0.564712	0.501506	4807	tags=40%	list=27%	signal=29%	H2bc21/H2ac13/H3c10/Dnmt1/H2ax/H4c9/H2az2/Rbbp4/H2bc15/H3c4/H3c8/H4c12/H3c13/H2bc13/H4c6/Dnmt3b/H2bc22/H3c3/Phf19/H2bc8/H2ac7/H3c6/H2bc23/H2ac23/H2bc24/H2ac6/H3c14/H4c18/H2bc11
REACTOME_APC_CDC20_MEDIATED_DEGRADATION_OF_NEK2A	REACTOME_APC_CDC20_MEDIATED_DEGRADATION_OF_NEK2A	26	-0.420812	-1.21218	0.212038	0.607843	0.539809	8506	tags=77%	list=48%	signal=40%	Bub3/Ubb/Anapc11/Anapc4/Anapc7/Bub1b/Nek2/Cdc23/Uba52/Ube2e1/Mad2l1/Ube2s/Anapc16/Anapc10/Cdc26/Cdc20/Ube2c/Ube2d1/Cdc16/Rps27a
REACTOME_CYTOKINE_SIGNALING_IN_IMMUNE_SYSTEM	REACTOME_CYTOKINE_SIGNALING_IN_IMMUNE_SYSTEM	441	-0.300393	-1.21852	0.0492308	0.314914	0.279667	5664	tags=34%	list=32%	signal=24%	Ptk2b/Fancf/Ube2l6/Psma6/Stat2/Vrk3/Mapk1/Vamp2/Cntfr/Psmc5/Npm1/Sphk1/Eda2r/Psmb6/Il4ra/Snap25/Il10/Rnf7/Eif2ak2/Myd88/Csf2rb/Tubb3/Cenpx/Il15ra/Traf2/Akt3/Il18/Ptpn6/Csk/Psmd10/Fance/Psme2/Irf3/Psmb8/Tnfrsf1b/Il12b/Il4/Fanca/Il1rap/H3c10/Tnfrsf18/Irf9/Tuba1b/Ctf1/Rapgef1/Ifnar1/Il1b/Syk/Trp53/Stat5b/Traf3/Lyn/H3c4/Socs1/Tnfrsf11a/Tnfsf9/Alpk1/Skp1/Il1r2/Inpp5d/H3c8/Txlna/Il18r1/Sla2/H3c13/Ilf3/…
REACTOME_AMPLIFICATION_OF_SIGNAL_FROM_THE_KINETOCHORES	REACTOME_AMPLIFICATION_OF_SIGNAL_FROM_THE_KINETOCHORES	92	-0.345086	-1.22062	0.137805	0.500756	0.444708	5846	tags=37%	list=33%	signal=25%	Mad2l1/Zw10/Cenpp/Ndc80/Pmf1/Ppp2r5c/Cdc20/Zwint/Incenp/Spc24/Nup85/Cenpe/Cenph/Ercc6l/Nup133/Kif2c/Rcc2/Nup107/Cenpm/Nuf2/Clasp2/Cenpq/Cenpl/Itgb3bp/Nsl1/Cenps/Kntc1/Cenpi/Dsn1/Cenpo/Rps27/Ska1/Kif18a/Cenpn
REACTOME_REGULATION_OF_APC_C_ACTIVATORS_BETWEEN_G1_S_AND_EARLY_ANAPHASE	REACTOME_REGULATION_OF_APC_C_ACTIVATORS_BETWEEN_G1_S_AND_EARLY_ANAPHASE	35	-0.403898	-1.22084	0.1893	0.590474	0.524384	8506	tags=69%	list=48%	signal=36%	Bub3/Ubb/Anapc11/Anapc4/Anapc7/Bub1b/Cdk1/Cdc23/Uba52/Ube2e1/Fbxo5/Mad2l1/Cdk2/Ube2s/Anapc16/Anapc10/Cdc26/Cdc20/Ccna1/Ube2c/Skp1/Ube2d1/Cdc16/Rps27a
REACTOME_TRP_CHANNELS	REACTOME_TRP_CHANNELS	25	-0.431854	-1.22592	0.189488	0.590474	0.524384	2967	tags=36%	list=17%	signal=30%	Trpv1/Trpc1/Trpa1/Trpc3/Trpc4/Trpm2/Trpv4/Trpm3/Trpm6
REACTOME_FORMATION_OF_INCISION_COMPLEX_IN_GG_NER	REACTOME_FORMATION_OF_INCISION_COMPLEX_IN_GG_NER	43	-0.391511	-1.22903	0.166003	0.558635	0.496109	6819	tags=70%	list=38%	signal=43%	Rpa3/Pias1/Rad23a/Ddb1/Ercc2/Ubb/Ercc5/Ube2n/Ercc4/Cdk7/Xpc/Sumo1/Uba52/Sumo3/Rbx1/Rnf111/Sumo2/Gtf2h4/Pias3/Ube2v2/Gtf2h3/Rpa2/Mnat1/Ccnh/Ddb2/Xpa/Cetn2/Rps27a/Rpa1/Parp1
REACTOME_RHO_GTPASES_ACTIVATE_FORMINS	REACTOME_RHO_GTPASES_ACTIVATE_FORMINS	133	-0.330052	-1.22903	0.114286	0.496154	0.440621	5846	tags=35%	list=33%	signal=23%	Mad2l1/Zw10/Cenpp/Ndc80/Pmf1/Srgap2/Ppp2r5c/Cdc20/Zwint/Tubb3/Incenp/Spc24/Nup85/Cenpe/Cenph/Ercc6l/Nup133/Tuba1b/Kif2c/Rcc2/Nup107/Cenpm/Nuf2/Clasp2/Cenpq/Cenpl/Itgb3bp/Nsl1/Cenps/Kntc1/Tubb1/Cenpi/Dsn1/Scai/Dvl2/Cenpo/Tubb2b/Rps27/Pfn2/Ska1/Kif18a/Evl/Cenpn/Fmnl1/Fmnl3/Tuba8
REACTOME_SUMOYLATION_OF_UBIQUITINYLATION_PROTEINS	REACTOME_SUMOYLATION_OF_UBIQUITINYLATION_PROTEINS	37	-0.404285	-1.23157	0.167813	0.560093	0.497404	7152	tags=51%	list=40%	signal=31%	Aaas/Pias4/Sumo1/Nup62/Ndc1/Nup153/Nup35/Vhl/Pom121/Nup93/Pml/Nup214/Nup85/Nup133/Nup155/Nup107/Trim27/Rae1/Nup210
REACTOME_TOLL_LIKE_RECEPTOR_CASCADES	REACTOME_TOLL_LIKE_RECEPTOR_CASCADES	145	-0.328813	-1.23375	0.100679	0.455704	0.404698	3690	tags=23%	list=21%	signal=18%	Unc93b1/Alpk1/Skp1/Irf7/Cd14/Dusp7/Ube2d1/Birc3/S100b/Peli3/Irf5/Rps27a/Itgb2/Rps6ka5/Ripk2/Nod1/Gsdmd/Nfkbia/Nlrc5/Mapk11/Tnip2/Nfkb2/Cd180/Ager/Fgb/Ly86/Tifa/Map3k8/Map2k6/Sarm1/Tasl/Mapk10/Tlr9
REACTOME_TELOMERE_EXTENSION_BY_TELOMERASE	REACTOME_TELOMERE_EXTENSION_BY_TELOMERASE	20	-0.460664	-1.23666	0.187853	0.590474	0.524384	8904	tags=85%	list=50%	signal=42%	Dkc1/Ccna2/Ankrd28/Terf2/Nhp2/Terf2ip/Rtel1/Ppp6c/Shq1/Cdk2/Acd/Gar1/Ccna1/Pif1/Nop10/Tert/Pot1a
REACTOME_INTERLEUKIN_17_SIGNALING	REACTOME_INTERLEUKIN_17_SIGNALING	58	-0.373165	-1.23722	0.151015	0.526513	0.467582	2076	tags=16%	list=12%	signal=14%	Rps27a/Rps6ka5/Ripk2/Nod1/Mapk11/Tnip2/Map3k8/Map2k6/Mapk10
REACTOME_CLASS_A_1_RHODOPSIN_LIKE_RECEPTORS	REACTOME_CLASS_A_1_RHODOPSIN_LIKE_RECEPTORS	276	-0.313585	-1.23731	0.0615058	0.354396	0.314729	2772	tags=31%	list=16%	signal=26%	Htr1f/Htr5a/Npffr2/Npy5r/Oxt/Ppy/Prlh/Rln3/Rrh/Rxfp3/Taar1/Uts2/Gpr68/Ccl21a/Oprk1/Ccr3/Gpbar1/Prlhr/Uts2b/Cck/Htr7/Sstr1/Cort/Adra2a/Cx3cr1/Ffar2/Fpr2/Ccl5/F2rl2/F2/S1pr3/Hebp1/Pomc/Cxcr2/Oxtr/S1pr4/Tac1/Drd4/Mtnr1a/Pyy/Ece2/Cxcl12/Ccl6/Ccl9/Npy1r/Ccl20/Gpr18/Rho/Cxcl9/Sst/Ccl19/S1pr2/Hrh2/Cxcl10/Cxcr4/Cxcl16/Gpr37/Cnr2/Cxcr5/Ccr10/Cxcl5/Adrb2/S1pr1/Gper1/Plppr1/Ntsr1/P2ry10/Tshb/Ccr7/Gpr65/Adra…
REACTOME_TNFS_BIND_THEIR_PHYSIOLOGICAL_RECEPTORS	REACTOME_TNFS_BIND_THEIR_PHYSIOLOGICAL_RECEPTORS	25	-0.43641	-1.23885	0.172891	0.56463	0.501433	2368	tags=32%	list=13%	signal=28%	Cd27/Tnfrsf8/Tnfrsf25/Tnfrsf17/Tnfsf11/Tnfrsf13b/Lta/Tnfrsf4
REACTOME_MITOTIC_METAPHASE_AND_ANAPHASE	REACTOME_MITOTIC_METAPHASE_AND_ANAPHASE	221	-0.319112	-1.24118	0.0649351	0.365615	0.324693	8525	tags=58%	list=48%	signal=30%	Psma7/Bub3/Nudc/Spdl1/Mapre1/Chmp4b/Ubb/Ahctf1/Bub1/Psmd9/Anapc11/Kpnb1/Psmb4/Chmp2b/Pttg1/Psma2/Psmf1/Cenpt/Psmc3/Anapc4/Xpo1/Anapc7/Zwilch/Bub1b/Psmd5/Rangap1/Rbm39/Chmp7/Seh1l/Cdk1/Psmc1/Mad1l1/Smc1a/Smc3/Nde1/Psme1/Ppp2r5d/Stag1/Ppp1cc/Emd/Ran/Cdc23/Chmp6/Sumo1/Ndc1/Tuba1a/Psmd13/Psmb10/Psma4/Uba52/Lmnb1/Nup35/Psmb1/Psma8/Psmc4/Hdac8/Psmd4/Ube2e1/Ppp2r1b/Fbxo5/Cdca5/Mad2l1/Zw10/Pom121/Psmb5/P…
REACTOME_POTASSIUM_CHANNELS	REACTOME_POTASSIUM_CHANNELS	94	-0.349024	-1.24138	0.12	0.496154	0.440621	2630	tags=23%	list=15%	signal=20%	Gngt2/Kcnv2/Gng10/Gabbr1/Kcnj1/Kcnj12/Gng2/Kcnab2/Gng11/Kcnj15/Kcnq5/Kcng3/Kcna3/Kcnn1/Kcnc3/Kcns1/Gabbr2/Kcnc2/Kcnb2/Kcnj11/Kcnab3/Kcnc1
REACTOME_AURKA_ACTIVATION_BY_TPX2	REACTOME_AURKA_ACTIVATION_BY_TPX2	69	-0.364126	-1.24201	0.14375	0.509171	0.452181	7537	tags=51%	list=43%	signal=29%	Cdk1/Nek2/Nde1/Cep76/Dctn3/Ywhae/Cdk5rap2/Cep135/Tuba1a/Hmmr/Ssna1/Cep70/Cep164/Cep43/Aurka/Cep57/Ofd1/Haus2/Tubb5/Cep290/Cep72/Tubg1/Haus3/Cep63/Haus6/Cep192/Haus1/Ninl/Sdccag8/Cep250/Cetn2/Haus8/Haus5/Cep152/Ccp110
REACTOME_NOD1_2_SIGNALING_PATHWAY	REACTOME_NOD1_2_SIGNALING_PATHWAY	31	-0.416889	-1.24299	0.17284	0.56463	0.501433	3285	tags=71%	list=19%	signal=58%	Ube2v1/Cyld/Casp9/Birc2/Ubb/Casp8/Ube2n/Mapk13/Casp1/Tab3/Uba52/Tab1/Aamp/Mapk12/Tnfaip3/Birc3/Rps27a/Ripk2/Nod1/Mapk11/Map2k6/Casp4
REACTOME_CHOLESTEROL_BIOSYNTHESIS	REACTOME_CHOLESTEROL_BIOSYNTHESIS	26	-0.434137	-1.25056	0.175103	0.567069	0.503598	5262	tags=46%	list=30%	signal=32%	Pmvk/Fdft1/Cyp51/Plpp6/Lss/Idi1/Mvd/Acat2/Lbr/Hsd17b7/Arv1/Mvk
REACTOME_NEUREXINS_AND_NEUROLIGINS	REACTOME_NEUREXINS_AND_NEUROLIGINS	30	-0.424413	-1.25061	0.164575	0.558635	0.496109	3376	tags=37%	list=19%	signal=30%	Nlgn1/Dlgap1/Homer3/Homer2/Nrxn2/Dlgap2/Shank1/Dlg2/Grm5/Lrrtm1/Lrrtm2
REACTOME_DOWNSTREAM_SIGNALING_EVENTS_OF_B_CELL_RECEPTOR_BCR	REACTOME_DOWNSTREAM_SIGNALING_EVENTS_OF_B_CELL_RECEPTOR_BCR	76	-0.361455	-1.25064	0.127607	0.496154	0.440621	8525	tags=62%	list=48%	signal=32%	Psma7/Nfatc3/Ubb/Calm1/Psmd9/Psmb4/Psma2/Psmf1/Psmc3/Bcl10/Nfkb1/Psmd5/Psmc1/Fkbp1a/Psme1/Calm3/Ikbkb/Ppp3ca/Nfkbib/Psmd13/Psmb10/Psma4/Rela/Uba52/Psmb1/Psma8/Psmc4/Psmd4/Psmb5/Psma6/Psmc5/Psmb6/Psmd10/Psme2/Psmb8/Skp1/Rel/Nfatc2/Rps27a/Rasgrp3/Malt1/Nfatc1/Nfkbia/Psme2b/Prkcb/Rasgrp1/Card11
REACTOME_ACTIVATION_OF_APC_C_AND_APC_C_CDC20_MEDIATED_DEGRADATION_OF_MITOTIC_PROTEINS	REACTOME_ACTIVATION_OF_APC_C_AND_APC_C_CDC20_MEDIATED_DEGRADATION_OF_MITOTIC_PROTEINS	75	-0.362882	-1.25225	0.124231	0.496154	0.440621	8525	tags=63%	list=48%	signal=33%	Psma7/Bub3/Ubb/Psmd9/Anapc11/Psmb4/Pttg1/Psma2/Psmf1/Psmc3/Anapc4/Anapc7/Bub1b/Psmd5/Cdk1/Psmc1/Nek2/Psme1/Cdc23/Psmd13/Psmb10/Psma4/Uba52/Psmb1/Psma8/Psmc4/Psmd4/Ube2e1/Mad2l1/Psmb5/Psma6/Psmc5/Psmb6/Ube2s/Anapc16/Anapc10/Cdc26/Cdc20/Psmd10/Psme2/Psmb8/Ccna1/Ube2c/Ube2d1/Cdc16/Rps27a/Psme2b
REACTOME_PLATELET_AGGREGATION_PLUG_FORMATION	REACTOME_PLATELET_AGGREGATION_PLUG_FORMATION	35	-0.414481	-1.25283	0.170096	0.560231	0.497526	2030	tags=26%	list=11%	signal=23%	Adra2a/Ptpn1/Rasgrp2/F2/Fgb/Apbb1ip/Rasgrp1/Gp9/Rapgef4
REACTOME_CDK_MEDIATED_PHOSPHORYLATION_AND_REMOVAL_OF_CDC6	REACTOME_CDK_MEDIATED_PHOSPHORYLATION_AND_REMOVAL_OF_CDC6	71	-0.365682	-1.25456	0.136139	0.497034	0.441403	8347	tags=59%	list=47%	signal=31%	Ubb/Psmd9/Anapc11/Psmb4/Psma2/Psmf1/Psmc3/Anapc4/Anapc7/Psmd5/Psmc1/Psme1/Cdc23/Psmd13/Psmb10/Psma4/Uba52/Psmb1/Psma8/Psmc4/Psmd4/Ube2e1/Psmb5/Psma6/Psmc5/Psmb6/Cdk2/Ube2s/Anapc16/Anapc10/Cdc26/Psmd10/Psme2/Psmb8/Ccna1/Ube2c/Ccne1/Cdc6/Ube2d1/Cdc16/Rps27a/Psme2b
REACTOME_DEPOSITION_OF_NEW_CENPA_CONTAINING_NUCLEOSOMES_AT_THE_CENTROMERE	REACTOME_DEPOSITION_OF_NEW_CENPA_CONTAINING_NUCLEOSOMES_AT_THE_CENTROMERE	72	-0.364809	-1.25495	0.134236	0.497034	0.441403	5038	tags=43%	list=28%	signal=31%	Cenpx/H2ac15/H2bc21/H2ac13/Cenph/H2ax/H4c9/H2az2/Rbbp4/H2bc15/Mis18a/Cenpm/Cenpq/H4c12/Cenpl/Itgb3bp/H2bc13/H4c6/Cenps/H2bc22/Cenpi/Cenpo/H2bc8/Cenpn/H2ac7/H2bc23/H2ac23/H2bc24/H2ac6/H4c18/H2bc11
REACTOME_INHIBITION_OF_DNA_RECOMBINATION_AT_TELOMERE	REACTOME_INHIBITION_OF_DNA_RECOMBINATION_AT_TELOMERE	55	-0.382225	-1.25821	0.130155	0.497034	0.441403	1083	tags=16%	list=6%	signal=15%	H2bc8/Pot1a/H2ac7/H2bc23/H2ac23/H2bc24/H2ac6/H4c18/H2bc11
REACTOME_BASE_EXCISION_REPAIR_AP_SITE_FORMATION	REACTOME_BASE_EXCISION_REPAIR_AP_SITE_FORMATION	62	-0.376195	-1.26115	0.131043	0.497034	0.441403	5320	tags=45%	list=30%	signal=32%	Acd/Mpg/H2ac15/H2bc21/H2ac13/Mutyh/Ung/H2ax/H4c9/H2az2/H2bc15/Neil2/H4c12/Neil1/H2bc13/H4c6/Nthl1/H2bc22/H2bc8/Pot1a/H2ac7/H2bc23/Mbd4/H2ac23/H2bc24/H2ac6/H4c18/H2bc11
REACTOME_DEADENYLATION_DEPENDENT_MRNA_DECAY	REACTOME_DEADENYLATION_DEPENDENT_MRNA_DECAY	50	-0.389716	-1.26161	0.133593	0.497034	0.441403	7792	tags=60%	list=44%	signal=34%	Parn/Eif4b/Dcp1b/Lsm1/Dcp1a/Pabpc1/Lsm6/Eif4a2/Cnot4/Dcp2/Exosc2/Lsm4/Edc4/Exosc3/Cnot8/Eif4a3/Exosc1/Ddx6/Cnot9/Exosc7/Lsm3/Exosc8/Exosc4/Lsm7/Exosc6/Lsm5/Lsm2/Exosc9/Exosc5/Nt5c3b
REACTOME_NUCLEAR_PORE_COMPLEX_NPC_DISASSEMBLY	REACTOME_NUCLEAR_PORE_COMPLEX_NPC_DISASSEMBLY	31	-0.423212	-1.26184	0.165981	0.558635	0.496109	7653	tags=52%	list=43%	signal=29%	Seh1l/Cdk1/Aaas/Nup62/Ndc1/Nup153/Nup35/Pom121/Nup93/Nup214/Nup85/Nup133/Nup155/Nup107/Rae1/Nup210
REACTOME_TRISTETRAPROLIN_TTP_ZFP36_BINDS_AND_DESTABILIZES_MRNA	REACTOME_TRISTETRAPROLIN_TTP_ZFP36_BINDS_AND_DESTABILIZES_MRNA	17	-0.492409	-1.2654	0.169343	0.560231	0.497526	7258	tags=76%	list=41%	signal=45%	Dcp1a/Zfp36/Dcp2/Exosc2/Exosc3/Exosc1/Exosc7/Xrn1/Exosc8/Exosc4/Exosc6/Exosc9/Exosc5
REACTOME_FANCONI_ANEMIA_PATHWAY	REACTOME_FANCONI_ANEMIA_PATHWAY	37	-0.415623	-1.26611	0.134801	0.497034	0.441403	7603	tags=65%	list=43%	signal=37%	Dclre1b/Slx1b/Fancm/Usp1/Uba52/Slx4/Faap24/Eme1/Fan1/Fancf/Cenpx/Fance/Fanca/Eme2/Rpa2/Fancg/Cenps/Rps27a/Ube2t/Mus81/Rpa1/Fancl/Atrip/Fancd2
REACTOME_TNFR2_NON_CANONICAL_NF_KB_PATHWAY	REACTOME_TNFR2_NON_CANONICAL_NF_KB_PATHWAY	95	-0.355358	-1.26776	0.0883777	0.425419	0.377803	6767	tags=46%	list=38%	signal=29%	Tnfsf8/Cd40lg/Psmd13/Psmb10/Psma4/Uba52/Tnfrsf9/Psmb1/Psma8/Psmc4/Psmd4/Psmb5/Psma6/Psmc5/Eda2r/Psmb6/Traf2/Psmd10/Psme2/Psmb8/Tnfrsf1b/Tnfrsf18/Traf3/Tnfrsf11a/Tnfsf9/Skp1/Birc3/Cd27/Map3k14/Rps27a/Tnfrsf8/Cd40/Tnfrsf25/Tnfrsf17/Psme2b/Nfkb2/Tnfsf11/Tnfrsf13b/Lta/Tnfsf14/Tnfrsf13c/Tnfrsf4/Ltb/Tnf
REACTOME_MITOTIC_SPINDLE_CHECKPOINT	REACTOME_MITOTIC_SPINDLE_CHECKPOINT	109	-0.351276	-1.26964	0.087886	0.425419	0.377803	5846	tags=38%	list=33%	signal=25%	Mad2l1/Zw10/Cenpp/Ndc80/Pmf1/Ube2s/Anapc16/Anapc10/Ppp2r5c/Cdc26/Cdc20/Zwint/Incenp/Spc24/Nup85/Cenpe/Cenph/Ercc6l/Nup133/Kif2c/Ube2c/Rcc2/Nup107/Cenpm/Nuf2/Clasp2/Cenpq/Cenpl/Itgb3bp/Ube2d1/Nsl1/Cenps/Kntc1/Cdc16/Cenpi/Dsn1/Cenpo/Rps27/Ska1/Kif18a/Cenpn
REACTOME_GPCR_LIGAND_BINDING	REACTOME_GPCR_LIGAND_BINDING	344	-0.316564	-1.26992	0.0386764	0.282752	0.251104	2772	tags=30%	list=16%	signal=26%	Htr1f/Htr5a/Npffr2/Npy5r/Oxt/Ppy/Prlh/Rln3/Rrh/Rxfp3/Taar1/Tas2r135/Uts2/Gngt2/Gng10/Gpr68/Ccl21a/Gabbr1/Oprk1/Ccr3/Gpbar1/Prlhr/Uts2b/Cck/Htr7/Sstr1/Cort/Adra2a/Cx3cr1/Ffar2/Fpr2/Ccl5/Glp1r/F2rl2/Iapp/F2/S1pr3/Hebp1/Pomc/Cxcr2/Oxtr/Gng2/S1pr4/Tac1/Ramp3/Drd4/Mtnr1a/Pyy/Ece2/Cxcl12/Ccl6/Ccl9/Gcg/Npy1r/Ccl20/Gpr18/Rho/Cxcl9/Sst/Ccl19/Gng11/S1pr2/Hrh2/Cxcl10/Cxcr4/Sct/Cxcl16/Gpr37/Cnr2/Cxcr5/Ccr10/…
REACTOME_MRNA_CAPPING	REACTOME_MRNA_CAPPING	28	-0.435262	-1.27354	0.152235	0.528384	0.469243	8415	tags=75%	list=47%	signal=39%	Rngtt/Ncbp2/Ncbp1/Ercc2/Supt5/Polr2c/Polr2i/Polr2b/Cdk7/Polr2f/Polr2k/Polr2e/Polr2l/Gtf2h4/Gtf2h3/Mnat1/Ccnh/Rnmt/Polr2d/Polr2g/Polr2h
REACTOME_DAP12_INTERACTIONS	REACTOME_DAP12_INTERACTIONS	50	-0.393489	-1.27382	0.12192	0.496154	0.440621	4234	tags=36%	list=24%	signal=27%	H2-Q4/Syk/Tyrobp/Lcp2/Klrd1/H2-T22/H2-M2/Klrc2/H2-Q7/H2-M3/Fyn/H2-Q6/Lck/Grap2/Lat/Trem2/Btk/Siglecg
REACTOME_SUMOYLATION_OF_SUMOYLATION_PROTEINS	REACTOME_SUMOYLATION_OF_SUMOYLATION_PROTEINS	33	-0.42323	-1.27652	0.135989	0.497034	0.441403	7152	tags=52%	list=40%	signal=31%	Aaas/Pias4/Sumo1/Nup62/Ndc1/Nup153/Nup35/Pom121/Sumo2/Nup93/Nup214/Nup85/Nup133/Nup155/Nup107/Rae1/Nup210
REACTOME_PROTEIN_UBIQUITINATION	REACTOME_PROTEIN_UBIQUITINATION	71	-0.372273	-1.27717	0.118812	0.496154	0.440621	7050	tags=46%	list=40%	signal=28%	Ube2q2/Rnf20/Usp5/Pex14/Pcna/Ube2k/H2bc9/Uba52/Ube2e3/Ube2e1/Pex10/Rnf181/Ube2s/Hltf/H2bc21/Uchl3/Ube2c/H2bc15/Ube2g2/Ube2v2/Ube2d1/H2bc13/Otulin/H2bc22/Rad18/Prkdc/Rps27a/Ube2t/Rnf144a/H2bc8/H2bc23/H2bc24/H2bc11
REACTOME_TELOMERE_MAINTENANCE	REACTOME_TELOMERE_MAINTENANCE	98	-0.358773	-1.27866	0.0749698	0.396093	0.35176	6913	tags=58%	list=39%	signal=36%	Ten1/Pcna/Fen1/Pold4/Rfc5/H2bc9/Prim1/H2aj/Atrx/Rtel1/Prim2/H3f3a/Chtf8/Rfc1/Ppp6c/Pold2/Shq1/H3f3b/Cdk2/Acd/Rfc2/Gar1/H2ac15/H2bc21/H2ac13/Ccna1/H2ax/H4c9/H2az2/H2bc15/Rpa2/Pif1/H4c12/Chtf18/Nop10/H2bc13/H4c6/Pola1/H2bc22/Tert/Rfc4/Dna2/Rpa1/Ctc1/Pold1/Dscc1/H2bc8/Blm/Pot1a/H2ac7/Rfc3/H2bc23/H2ac23/H2bc24/H2ac6/H4c18/H2bc11
REACTOME_TRANSPORT_OF_THE_SLBP_DEPENDANT_MATURE_MRNA	REACTOME_TRANSPORT_OF_THE_SLBP_DEPENDANT_MATURE_MRNA	34	-0.424718	-1.28413	0.127397	0.496154	0.440621	7152	tags=47%	list=40%	signal=28%	Aaas/Nup62/Ndc1/Nup153/Nup35/Pom121/Nup93/Nup214/Alyref/Nup85/Slbp/Nup133/Nup155/Nup107/Rae1/Nup210
REACTOME_MITOTIC_PROMETAPHASE	REACTOME_MITOTIC_PROMETAPHASE	190	-0.333198	-1.28483	0.0484048	0.312211	0.277266	7470	tags=47%	list=42%	signal=28%	Numa1/Mad1l1/Smc1a/Nek2/Smc3/Csnk2b/Nde1/Cep76/Ppp2r5d/Stag1/Dctn3/Ppp1cc/Ywhae/Cdk5rap2/Cep135/Tuba1a/Nme7/Ssna1/Smc2/Cep70/Hdac8/Ppp2r1b/Cep164/Cep43/Ncaph/Cdca5/Mad2l1/Zw10/Cenpp/Ndc80/Cep57/Ofd1/Ncapd2/Pmf1/Ppp2r5c/Haus2/Cdc20/Zwint/Tubb3/Incenp/Spc24/Nup85/Cenpe/Tubb5/Cenph/Ercc6l/Smc4/Nup133/Cep290/Tuba1b/Kif2c/Cep72/Rcc2/Tubg1/Nup107/Cenpm/Mzt2/Nuf2/Haus3/Clasp2/Cep63/Cenpq/Haus6/Cep192/Ce…
REACTOME_CTLA4_INHIBITORY_SIGNALING	REACTOME_CTLA4_INHIBITORY_SIGNALING	21	-0.471325	-1.28584	0.143855	0.509171	0.452181	5236	tags=43%	list=30%	signal=30%	Ppp2r1b/Ppp2r5c/Akt3/Lyn/Ctla4/Fyn/Cd86/Lck/Cd80
REACTOME_PHOSPHORYLATION_OF_THE_APC_C	REACTOME_PHOSPHORYLATION_OF_THE_APC_C	20	-0.479074	-1.28608	0.146893	0.514457	0.456875	8196	tags=65%	list=46%	signal=35%	Anapc11/Anapc4/Anapc7/Cdk1/Cdc23/Ube2e1/Ube2s/Anapc16/Anapc10/Cdc26/Ube2c/Ube2d1/Cdc16
REACTOME_GAP_JUNCTION_TRAFFICKING_AND_REGULATION	REACTOME_GAP_JUNCTION_TRAFFICKING_AND_REGULATION	42	-0.411879	-1.28641	0.122312	0.496154	0.440621	2099	tags=19%	list=12%	signal=17%	Tubb1/Gjd3/Tubb2b/Gjb6/Gja4/Gjd2/Tuba8/Gja5
REACTOME_MITOCHONDRIAL_TRANSLATION	REACTOME_MITOCHONDRIAL_TRANSLATION	89	-0.36512	-1.28675	0.0989011	0.452955	0.402257	8481	tags=61%	list=48%	signal=32%	Chchd1/Mrps30/Mrps27/Mrpl4/Dap3/Mrpl43/Mrps34/Mrpl18/Mrpl21/Mrpl1/Mrps6/Mrpl54/Mrpl16/Mrps23/Mrpl58/Mrps7/Mrps22/Mrpl22/Mrpl24/Mrpl2/Mrpl57/Mrpl13/Mrpl19/Mrpl36/Mrps18b/Mrpl15/Mrpl28/Mrpl30/Mrps24/Gadd45gip1/Mrpl14/Mtrf1l/Mrps10/Mrps26/Mrps21/Mrrf/Mrps9/Mrpl23/Mrpl32/Aurkaip1/Mrpl17/Mrps17/Mrps25/Mrpl41/Mrps12/Mrpl40/Mrpl11/Mrps11/Eral1/Mrps18c/Mrpl52/Mrpl33/Mrps14/Mrps28
REACTOME_CONVERSION_FROM_APC_C_CDC20_TO_APC_C_CDH1_IN_LATE_ANAPHASE	REACTOME_CONVERSION_FROM_APC_C_CDC20_TO_APC_C_CDH1_IN_LATE_ANAPHASE	20	-0.481525	-1.29266	0.144068	0.509171	0.452181	8196	tags=65%	list=46%	signal=35%	Anapc11/Anapc4/Anapc7/Cdc23/Ube2e1/Ube2s/Anapc16/Anapc10/Cdc26/Cdc20/Ube2c/Ube2d1/Cdc16
REACTOME_MITOTIC_G1_PHASE_AND_G1_S_TRANSITION	REACTOME_MITOTIC_G1_PHASE_AND_G1_S_TRANSITION	130	-0.34989	-1.29733	0.0552359	0.330286	0.293318	6624	tags=45%	list=37%	signal=29%	Psmd13/Prim1/Psmb10/Psma4/Uba52/E2f1/Psmb1/Prim2/Psmc4/Cdc45/Psmd4/Ppp2r1b/Rbl2/Psmb5/Psma6/Mcm5/Psmc5/Lin52/Psmb6/Cdk2/Orc3/Akt3/E2f5/Psmd10/Psme2/Cdkn1c/Cdk4/Psmb8/Ccna1/Pole3/Ppp2r3d/Lin9/Rbbp4/Cks1b/Ccnd1/Pole4/Lyn/Skp1/Mcm7/Rpa2/Mnat1/Mcm6/Ccne1/Ccnh/Cdc6/Cdt1/E2f2/Mcm4/Mcm3/Pola1/Rps27a/Mcm8/Ccnd3/Rpa1/Orc6/Psme2b/E2f3/Ptk6/Orc1
REACTOME_ORC1_REMOVAL_FROM_CHROMATIN	REACTOME_ORC1_REMOVAL_FROM_CHROMATIN	69	-0.381288	-1.30055	0.09	0.427362	0.379529	6624	tags=46%	list=37%	signal=29%	Psmd13/Psmb10/Psma4/Uba52/Psmb1/Psma8/Psmc4/Psmd4/Rbx1/Psmb5/Psma6/Mcm5/Psmc5/Psmb6/Cdk2/Orc3/Psmd10/Psme2/Psmb8/Ccna1/Skp1/Mcm7/Mcm6/Cdc6/Cdt1/Mcm4/Mcm3/Rps27a/Mcm8/Orc6/Psme2b/Orc1
REACTOME_PROTEIN_HYDROXYLATION	REACTOME_PROTEIN_HYDROXYLATION	18	-0.503085	-1.31006	0.121563	0.496154	0.440621	5611	tags=61%	list=32%	signal=42%	Riox1/Rwdd1/Rccd1/Jmjd4/Drg1/Rpl8/Rps6/Rpl27a/Drg2/Rps23/Jmjd7
REACTOME_CLASS_C_3_METABOTROPIC_GLUTAMATE_PHEROMONE_RECEPTORS	REACTOME_CLASS_C_3_METABOTROPIC_GLUTAMATE_PHEROMONE_RECEPTORS	16	-0.522838	-1.31623	0.133034	0.497034	0.441403	2982	tags=50%	list=17%	signal=42%	Tas1r2/Grm4/Gprc6a/Tas2r135/Gabbr1/Grm5/Gabbr2/Grm6
REACTOME_RNA_POLYMERASE_II_TRANSCRIPTION_TERMINATION	REACTOME_RNA_POLYMERASE_II_TRANSCRIPTION_TERMINATION	62	-0.393017	-1.31754	0.0801527	0.413868	0.367545	8998	tags=74%	list=51%	signal=37%	Srsf5/Srrm1/Upf3b/Ncbp1/Pcf11/Poldip3/Cstf2t/Thoc6/U2af2/Cpsf6/Rnps1/Nudt21/Snrpd3/Ddx39a/Clp1/Casc3/Zfp473/Thoc1/Snrpe/Cpsf3/Cpsf7/U2af1l4/Thoc7/Srsf1/Ddx39b/Lsm10/Fyttd1/Eif4a3/Fip1l1/Srsf3/Snrpb/Sarnp/Alyref/Srsf2/Thoc3/Srsf7/Slbp/Chtop/Snrpf/Srsf9/Cpsf4/Rbm8a/U2af1/Magoh/Lsm11/Pabpn1
REACTOME_RNA_POLYMERASE_II_PROMOTER_ESCAPE	REACTOME_RNA_POLYMERASE_II_PROMOTER_ESCAPE	46	-0.41527	-1.31842	0.0980132	0.451561	0.401019	8431	tags=65%	list=48%	signal=34%	Gtf2e1/Ak6/Ercc2/Taf1/Polr2c/Polr2i/Polr2b/Cdk7/Gtf2e2/Taf13/Polr2f/Taf9/Tbp/Taf6/Polr2k/Polr2e/Polr2l/Gtf2h4/Taf10/Taf11/Taf9b/Gtf2h3/Taf7/Mnat1/Taf15/Ccnh/Polr2d/Polr2g/Polr2h/Taf5
REACTOME_FORMATION_OF_THE_EARLY_ELONGATION_COMPLEX	REACTOME_FORMATION_OF_THE_EARLY_ELONGATION_COMPLEX	32	-0.437561	-1.31893	0.118046	0.496154	0.440621	8415	tags=66%	list=47%	signal=35%	Ercc2/Supt5/Polr2c/Polr2i/Nelfb/Polr2b/Cdk7/Polr2f/Nelfcd/Polr2k/Polr2e/Supt4a/Polr2l/Gtf2h4/Nelfe/Gtf2h3/Mnat1/Ccnh/Polr2d/Polr2g/Polr2h
REACTOME_INHIBITION_OF_THE_PROTEOLYTIC_ACTIVITY_OF_APC_C_REQUIRED_FOR_THE_ONSET_OF_ANAPHASE_BY_MITOTIC_SPINDLE_CHECKPOINT_COMPONENTS	REACTOME_INHIBITION_OF_THE_PROTEOLYTIC_ACTIVITY_OF_APC_C_REQUIRED_FOR_THE_ONSET_OF_ANAPHASE_BY_MITOTIC_SPINDLE_CHECKPOINT_COMPONENTS	21	-0.483728	-1.31968	0.122905	0.496154	0.440621	8506	tags=76%	list=48%	signal=40%	Bub3/Anapc11/Anapc4/Anapc7/Bub1b/Cdc23/Ube2e1/Mad2l1/Ube2s/Anapc16/Anapc10/Cdc26/Cdc20/Ube2c/Ube2d1/Cdc16
REACTOME_FORMATION_OF_TC_NER_PRE_INCISION_COMPLEX	REACTOME_FORMATION_OF_TC_NER_PRE_INCISION_COMPLEX	49	-0.412064	-1.32453	0.080207	0.413868	0.367545	8415	tags=67%	list=47%	signal=35%	Ercc2/Ubb/Cops5/Polr2c/Tcea1/Xab2/Aqr/Polr2i/Polr2b/Cdk7/Polr2f/Zfp830/Gps1/Uba52/Rbx1/Polr2k/Polr2e/Cops8/Polr2l/Prpf19/Cops4/Gtf2h4/Isy1/Ercc8/Gtf2h3/Mnat1/Cops7b/Ccnh/Polr2d/Polr2g/Xpa/Polr2h/Rps27a
REACTOME_KSRP_KHSRP_BINDS_AND_DESTABILIZES_MRNA	REACTOME_KSRP_KHSRP_BINDS_AND_DESTABILIZES_MRNA	15	-0.537213	-1.32583	0.121396	0.496154	0.440621	7792	tags=80%	list=44%	signal=45%	Parn/Khsrp/Dcp2/Exosc2/Exosc3/Exosc1/Exosc7/Exosc8/Exosc4/Exosc6/Exosc9/Exosc5
REACTOME_ACTIVATED_TAK1_MEDIATES_P38_MAPK_ACTIVATION	REACTOME_ACTIVATED_TAK1_MEDIATES_P38_MAPK_ACTIVATION	23	-0.479075	-1.32911	0.125176	0.496154	0.440621	2076	tags=22%	list=12%	signal=19%	Rps27a/Ripk2/Nod1/Mapk11/Map2k6
REACTOME_INTERLEUKIN_2_FAMILY_SIGNALING	REACTOME_INTERLEUKIN_2_FAMILY_SIGNALING	34	-0.440282	-1.33119	0.0890411	0.425419	0.377803	5150	tags=44%	list=29%	signal=31%	Csf2rb/Il15ra/Ptpn6/Syk/Stat5b/Inpp5d/Il2rb/Il9r/Il21/Lck/Pik3cd/Il2rg/Il21r/Stat5a/Il2ra
REACTOME_E3_UBIQUITIN_LIGASES_UBIQUITINATE_TARGET_PROTEINS	REACTOME_E3_UBIQUITIN_LIGASES_UBIQUITINATE_TARGET_PROTEINS	51	-0.411938	-1.33475	0.075227	0.396093	0.35176	3006	tags=22%	list=17%	signal=18%	Ube2d1/H2bc13/H2bc22/Rad18/Prkdc/Rps27a/Rnf144a/H2bc8/H2bc23/H2bc24/H2bc11
REACTOME_MISMATCH_REPAIR	REACTOME_MISMATCH_REPAIR	15	-0.542477	-1.33882	0.112291	0.493827	0.438554	6911	tags=67%	list=39%	signal=41%	Pcna/Pold4/Pold2/Pms2/Mlh1/Msh6/Rpa2/Msh2/Rpa1/Pold1
REACTOME_TRAFFICKING_OF_AMPA_RECEPTORS	REACTOME_TRAFFICKING_OF_AMPA_RECEPTORS	27	-0.462918	-1.34	0.108183	0.481228	0.427366	1117	tags=22%	list=6%	signal=21%	Camk2a/Grip2/Prkcb/Grip1/Akap5/Cacng8
REACTOME_G1_S_TRANSITION	REACTOME_G1_S_TRANSITION	105	-0.371549	-1.34078	0.0476758	0.312211	0.277266	6624	tags=46%	list=37%	signal=29%	Psmd13/Prim1/Psmb10/Psma4/Uba52/Psmb1/Prim2/Psmc4/Cdc45/Psmd4/Ppp2r1b/Psmb5/Psma6/Mcm5/Psmc5/Psmb6/Cdk2/Orc3/Akt3/Psmd10/Psme2/Cdk4/Psmb8/Ccna1/Pole3/Ppp2r3d/Cks1b/Ccnd1/Pole4/Skp1/Mcm7/Rpa2/Mnat1/Mcm6/Ccne1/Ccnh/Cdc6/Cdt1/Mcm4/Mcm3/Pola1/Rps27a/Mcm8/Rpa1/Orc6/Psme2b/Ptk6/Orc1
REACTOME_TRANSPORT_OF_MATURE_MRNAS_DERIVED_FROM_INTRONLESS_TRANSCRIPTS	REACTOME_TRANSPORT_OF_MATURE_MRNAS_DERIVED_FROM_INTRONLESS_TRANSCRIPTS	41	-0.43091	-1.34079	0.0845638	0.425419	0.377803	7152	tags=46%	list=40%	signal=28%	Aaas/Nup62/Ndc1/Cpsf3/Nup153/Nup35/Pom121/Fip1l1/Nup93/Nup214/Alyref/Nup85/Slbp/Nup133/Cpsf4/Nup155/Nup107/Rae1/Nup210
REACTOME_SIGNALING_BY_THE_B_CELL_RECEPTOR_BCR	REACTOME_SIGNALING_BY_THE_B_CELL_RECEPTOR_BCR	100	-0.375282	-1.34177	0.0481928	0.312211	0.277266	8261	tags=61%	list=47%	signal=33%	Plcg2/Calm1/Psmd9/Psmb4/Psma2/Psmf1/Psmc3/Bcl10/Nfkb1/Nck1/Psmd5/Psmc1/Fkbp1a/Psme1/Calm3/Ikbkb/Ppp3ca/Nfkbib/Itpr1/Psmd13/Psmb10/Psma4/Rela/Uba52/Psmb1/Psma8/Psmc4/Pik3ap1/Psmd4/Grb2/Psmb5/Psma6/Psmc5/Psmb6/Ptpn6/Psmd10/Psme2/Psmb8/Syk/Lyn/Skp1/Rel/Sh3kbp1/Blnk/Trpc1/Nfatc2/Rps27a/Rasgrp3/Malt1/Nfatc1/Nfkbia/Psme2b/Prkcb/Cd79a/Btk/Pik3cd/Cd22/Cd19/Cd79b/Rasgrp1/Card11
REACTOME_TP53_REGULATES_TRANSCRIPTION_OF_DNA_REPAIR_GENES	REACTOME_TP53_REGULATES_TRANSCRIPTION_OF_DNA_REPAIR_GENES	43	-0.430665	-1.35194	0.0836653	0.425419	0.377803	8415	tags=67%	list=47%	signal=36%	Ercc2/Supt5/Cdk12/Ccnk/Polr2c/Tcea1/Polr2i/Nelfb/Polr2b/Eloc/Cdk7/Polr2f/Elob/Nelfcd/Polr2k/Polr2e/Supt4a/Polr2l/Supt16/Gtf2h4/Nelfe/Cdk9/Ssrp1/Gtf2h3/Mnat1/Ccnh/Polr2d/Polr2g/Polr2h
REACTOME_PROCESSIVE_SYNTHESIS_ON_THE_C_STRAND_OF_THE_TELOMERE	REACTOME_PROCESSIVE_SYNTHESIS_ON_THE_C_STRAND_OF_THE_TELOMERE	18	-0.519729	-1.3534	0.101302	0.455861	0.404838	1741	tags=61%	list=10%	signal=55%	Pcna/Fen1/Pold4/Pold2/Acd/Rpa2/Dna2/Rpa1/Pold1/Blm/Pot1a
REACTOME_ANCHORING_OF_THE_BASAL_BODY_TO_THE_PLASMA_MEMBRANE	REACTOME_ANCHORING_OF_THE_BASAL_BODY_TO_THE_PLASMA_MEMBRANE	94	-0.381021	-1.35519	0.0424242	0.293182	0.260367	7382	tags=50%	list=42%	signal=29%	Nek2/Nde1/Cep76/Dctn3/Ywhae/Cdk5rap2/Cep135/Tuba1a/Tmem216/Ssna1/Cep70/Cep164/Cep43/Tctn1/Cep57/Ofd1/Ttbk2/Haus2/Tmem67/Fbf1/Tubb5/C2cd3/Rpgrip1l/Cep290/Cep72/Nphp4/Tubg1/Haus3/Cep63/Haus6/Cep192/Haus1/Ninl/Sdccag8/Cc2d2a/Cep250/Cetn2/Haus8/Mks1/Haus5/Tctn3/Cep152/Ccp110/Cep97/Iqcb1/Ahi1/Kif24
REACTOME_G_ALPHA_I_SIGNALLING_EVENTS	REACTOME_G_ALPHA_I_SIGNALLING_EVENTS	246	-0.345981	-1.35596	0.0149607	0.186768	0.165863	2772	tags=31%	list=16%	signal=27%	Htr1f/Htr5a/Npy5r/Pcp2/Ppy/Rln3/Rrh/Rxfp3/Tas2r135/Gngt2/Rgs20/Rgs7/Gng10/Ccl21a/Gabbr1/Oprk1/Ccr3/Sstr1/Cort/Adra2a/Cx3cr1/Pde1b/Gna15/Fpr2/Ccl5/Rgs19/S1pr3/Hebp1/Pomc/Cxcr2/Gng2/S1pr4/Drd4/Mtnr1a/Pyy/Cxcl12/Ccl6/Ccl9/Pde4a/Gpsm3/Npy1r/Ccl20/Gpr18/Rho/Cxcl9/Sst/Ccl19/Gng11/S1pr2/Pde4b/Cxcl10/Cxcr4/Cxcl16/Pde1c/Gpr37/Cnr2/Cxcr5/Ccr10/Cxcl5/Gper1/Gabbr2/Ccr7/Prkar1b/Cxcl13/Rgs16/Ccr6/Cxcr6/Ccl1/Gp…
REACTOME_SUMOYLATION_OF_DNA_REPLICATION_PROTEINS	REACTOME_SUMOYLATION_OF_DNA_REPLICATION_PROTEINS	41	-0.436097	-1.35693	0.0684564	0.373135	0.331371	7737	tags=59%	list=44%	signal=33%	Rangap1/Seh1l/Aaas/Pias4/Pcna/Sumo1/Nup62/Ndc1/Nup153/Sumo3/Nup35/Pom121/Top2a/Sumo2/Nup93/Nup214/Incenp/Pias3/Nup85/Nup133/Nup155/Nup107/Rae1/Nup210
REACTOME_CELL_CYCLE_CHECKPOINTS	REACTOME_CELL_CYCLE_CHECKPOINTS	279	-0.343961	-1.35723	0.0107203	0.151476	0.134522	6816	tags=45%	list=38%	signal=28%	Cdc23/Cdc25c/Phf20/Pkmyt1/Rfc5/Gtse1/H2bc9/Psmd13/Psmb10/Rad50/Psma4/Uba52/Psmb1/Psma8/Psmc4/Rnf168/Cdc45/Psmd4/Ube2e1/Ppp2r1b/Rad17/Brip1/Mad2l1/Uimc1/Kat5/Zw10/Psmb5/Psma6/Cenpp/Mcm5/Psmc5/Ndc80/Psmb6/Pmf1/Cdk2/Ube2s/Anapc16/Anapc10/Rfc2/Ppp2r5c/Cdc26/Nsd2/Cdc20/Zwint/Orc3/Incenp/Spc24/Psmd10/Chek2/H2bc21/Nup85/Cenpe/Psme2/Psmb8/Cenph/Ercc6l/Ccna1/Nup133/H2ax/H4c9/Kif2c/Rmi1/Ube2c/H2bc15/Chek1/…
REACTOME_CHROMOSOME_MAINTENANCE	REACTOME_CHROMOSOME_MAINTENANCE	125	-0.370336	-1.36983	0.0401277	0.28368	0.251928	6913	tags=58%	list=39%	signal=36%	Ten1/Pcna/Fen1/Pold4/Rfc5/H2bc9/Prim1/H2aj/Atrx/Rtel1/Prim2/Rbbp7/H3f3a/Chtf8/Rfc1/Cenpw/Ppp6c/Cenpp/Pold2/Shq1/Npm1/H3f3b/Cdk2/Acd/Rfc2/Gar1/Cenpx/H2ac15/H2bc21/H2ac13/Cenph/Ccna1/H2ax/H4c9/H2az2/Rbbp4/H2bc15/Mis18a/Cenpm/Rpa2/Cenpq/Pif1/H4c12/Cenpl/Chtf18/Itgb3bp/Nop10/H2bc13/H4c6/Pola1/Cenps/H2bc22/Tert/Rfc4/Cenpi/Dna2/Cenpo/Rpa1/Ctc1/Pold1/Dscc1/H2bc8/Blm/Cenpn/Pot1a/H2ac7/Rfc3/H2bc23/H2ac23/…
REACTOME_G2_M_CHECKPOINTS	REACTOME_G2_M_CHECKPOINTS	159	-0.361787	-1.37178	0.0245222	0.250912	0.222828	6721	tags=48%	list=38%	signal=30%	Pkmyt1/Rfc5/Gtse1/H2bc9/Psmd13/Psmb10/Rad50/Psma4/Uba52/Psmb1/Psma8/Psmc4/Rnf168/Cdc45/Psmd4/Rad17/Brip1/Uimc1/Kat5/Psmb5/Psma6/Mcm5/Psmc5/Psmb6/Cdk2/Rfc2/Nsd2/Orc3/Psmd10/Chek2/H2bc21/Psme2/Psmb8/H2ax/H4c9/Rmi1/H2bc15/Chek1/Top3a/Ube2v2/Trp53/Rnf8/Rhno1/Atm/Mcm7/Rpa2/Mcm6/Trp53bp1/H4c12/Mdc1/Topbp1/Cdc6/H2bc13/H4c6/Mcm4/Mcm3/Brca1/H2bc22/Rfc4/Rps27a/Mcm8/Bard1/Dna2/Rpa1/Orc6/Atrip/Rad9a/Psme2b/H…
REACTOME_MYD88_MAL_TIRAP_CASCADE_INITIATED_ON_PLASMA_MEMBRANE	REACTOME_MYD88_MAL_TIRAP_CASCADE_INITIATED_ON_PLASMA_MEMBRANE	83	-0.392347	-1.37441	0.0377129	0.282752	0.251104	3612	tags=23%	list=20%	signal=18%	Alpk1/Skp1/Dusp7/S100b/Peli3/Rps27a/Rps6ka5/Ripk2/Nod1/Nfkbia/Nlrc5/Mapk11/Tnip2/Nfkb2/Ager/Tifa/Map3k8/Map2k6/Mapk10
REACTOME_SEMAPHORIN_INTERACTIONS	REACTOME_SEMAPHORIN_INTERACTIONS	51	-0.424282	-1.37474	0.0635538	0.361696	0.321212	2060	tags=24%	list=12%	signal=21%	Plxnc1/Fyn/Rnd1/Ptprc/Cdk5r1/Sema4d/Cd72/Trem2/Crmp1/Plxna4/Dpysl5/Plxna3
REACTOME_DOWNSTREAM_TCR_SIGNALING	REACTOME_DOWNSTREAM_TCR_SIGNALING	87	-0.391016	-1.37549	0.0375758	0.282752	0.251104	8225	tags=59%	list=46%	signal=32%	Psmd9/Psmb4/Psma2/Psmf1/Psmc3/Bcl10/Ube2n/Nfkb1/Psmd5/Psmc1/H2-Aa/Cdc34/Ube2d2a/Psme1/Ikbkb/H2-Ab1/Psmd13/Psmb10/Psma4/Rela/Uba52/Psmb1/Psma8/Psmc4/Psmd4/H2-Eb1/Psmb5/Psma6/Psmc5/Psmb6/Psmd10/Psme2/Psmb8/Skp1/Inpp5d/Ube2d1/Cd4/Rps27a/Malt1/Ripk2/Nfkbia/Trat1/Cd3e/Lck/Psme2b/Cd247/Prkcq/H2-Eb2/Cd3g/Cd3d/Card11
REACTOME_HEME_DEGRADATION	REACTOME_HEME_DEGRADATION	16	-0.547027	-1.37712	0.0911809	0.427721	0.379848	1655	tags=25%	list=9%	signal=23%	Gsta1/Ugt1a5/Gsta2/Slco1b2
REACTOME_SWITCHING_OF_ORIGINS_TO_A_POST_REPLICATIVE_STATE	REACTOME_SWITCHING_OF_ORIGINS_TO_A_POST_REPLICATIVE_STATE	90	-0.390543	-1.37752	0.035409	0.282752	0.251104	8225	tags=60%	list=46%	signal=32%	Psmd9/Anapc11/Psmb4/Psma2/Psmf1/Psmc3/Anapc4/Anapc7/Mcm2/Psmd5/Psmc1/Psme1/Cdc23/Psmd13/Psmb10/Psma4/Uba52/Psmb1/Psma8/Psmc4/Psmd4/Ube2e1/Rbx1/Psmb5/Psma6/Mcm5/Psmc5/Psmb6/Cdk2/Ube2s/Anapc16/Anapc10/Cdc26/Orc3/Psmd10/Psme2/Psmb8/Ccna1/Ube2c/Skp1/Mcm7/Mcm6/Ccne1/Cdc6/Cdt1/Ube2d1/Mcm4/Mcm3/Cdc16/Rps27a/Mcm8/Orc6/Psme2b/Orc1
REACTOME_BASE_EXCISION_REPAIR	REACTOME_BASE_EXCISION_REPAIR	89	-0.39206	-1.38169	0.031746	0.280208	0.248845	5663	tags=48%	list=32%	signal=33%	Neil3/Pold2/Polb/Acd/Mpg/Rfc2/H2ac15/Apex1/H2bc21/H2ac13/Mutyh/Pole3/Lig3/Ung/H2ax/H4c9/H2az2/H2bc15/Pole4/Xrcc1/Neil2/Rpa2/H4c12/Neil1/H2bc13/H4c6/Nthl1/H2bc22/Rfc4/Rpa1/Pold1/H2bc8/Pot1a/H2ac7/Parp1/Rfc3/H2bc23/Mbd4/H2ac23/H2bc24/H2ac6/H4c18/H2bc11
REACTOME_PROCESSIVE_SYNTHESIS_ON_THE_LAGGING_STRAND	REACTOME_PROCESSIVE_SYNTHESIS_ON_THE_LAGGING_STRAND	15	-0.561501	-1.38577	0.0880121	0.425419	0.377803	6911	tags=73%	list=39%	signal=45%	Pcna/Fen1/Pold4/Prim1/Prim2/Pold2/Rpa2/Pola1/Dna2/Rpa1/Pold1
REACTOME_MRNA_SPLICING_MINOR_PATHWAY	REACTOME_MRNA_SPLICING_MINOR_PATHWAY	47	-0.433121	-1.38695	0.0604468	0.354396	0.314729	8079	tags=72%	list=46%	signal=39%	Snrpd2/Ddx23/Polr2c/Polr2i/Sf3b4/Ddx42/Snrpd3/Polr2b/Sf3b3/Polr2f/Snrpe/Zrsr2/Ybx1/Srsf1/Prpf6/Zmat5/Snrnp48/Sf3b2/Txnl4a/Polr2k/Polr2e/Snrpb/Snrpd1/Polr2l/Srsf2/Eftud2/Srsf7/Snrpf/Pdcd7/Snrnp40/Sf3b5/Polr2d/Polr2g/Polr2h
REACTOME_GAP_FILLING_DNA_REPAIR_SYNTHESIS_AND_LIGATION_IN_GG_NER	REACTOME_GAP_FILLING_DNA_REPAIR_SYNTHESIS_AND_LIGATION_IN_GG_NER	22	-0.505411	-1.38892	0.0865922	0.425419	0.377803	6911	tags=73%	list=39%	signal=44%	Pcna/Pole2/Pold4/Rfc5/Uba52/Rfc1/Pold2/Rfc2/Pole3/Pole4/Rpa2/Rfc4/Rps27a/Rpa1/Pold1/Rfc3
REACTOME_RESOLUTION_OF_D_LOOP_STRUCTURES	REACTOME_RESOLUTION_OF_D_LOOP_STRUCTURES	33	-0.460979	-1.39038	0.0618132	0.354396	0.314729	7355	tags=67%	list=42%	signal=39%	Slx1b/Xrcc2/Rad51/Rad50/Slx4/Eme1/Brip1/Kat5/Rad51ap1/Rad51b/Rmi1/Top3a/Eme2/Fignl1/Atm/Rad51d/Brca1/Bard1/Mus81/Dna2/Blm/Brca2
REACTOME_NONHOMOLOGOUS_END_JOINING_NHEJ	REACTOME_NONHOMOLOGOUS_END_JOINING_NHEJ	63	-0.415164	-1.39207	0.0445293	0.300802	0.267134	4384	tags=40%	list=25%	signal=30%	H2ax/H4c9/H2bc15/Xrcc5/Ube2v2/Rnf8/Xrcc4/Atm/Rif1/Trp53bp1/H4c12/Mdc1/Tdp1/H2bc13/H4c6/Brca1/H2bc22/Prkdc/Bard1/Poll/H2bc8/H2bc23/H2bc24/H4c18/H2bc11
REACTOME_ASSEMBLY_OF_THE_PRE_REPLICATIVE_COMPLEX	REACTOME_ASSEMBLY_OF_THE_PRE_REPLICATIVE_COMPLEX	82	-0.39758	-1.39361	0.0351942	0.282752	0.251104	8225	tags=61%	list=46%	signal=33%	Psmd9/Anapc11/Kpnb1/Psmb4/Psma2/Psmf1/Psmc3/Anapc4/Anapc7/Kpna1/Mcm2/Psmd5/Psmc1/Psme1/Cdc23/Psmd13/Psmb10/Psma4/Uba52/Psmb1/Psmc4/Psmd4/Ube2e1/Psmb5/Psma6/Mcm5/Psmc5/Psmb6/Ube2s/Anapc16/Anapc10/Cdc26/Orc3/Psmd10/Psme2/Psmb8/Ube2c/Mcm7/Mcm6/Cdc6/Cdt1/Ube2d1/Mcm4/Mcm3/Cdc16/Rps27a/Mcm8/Orc6/Psme2b/Orc1
REACTOME_GLOBAL_GENOME_NUCLEOTIDE_EXCISION_REPAIR_GG_NER	REACTOME_GLOBAL_GENOME_NUCLEOTIDE_EXCISION_REPAIR_GG_NER	81	-0.399109	-1.39417	0.035409	0.282752	0.251104	9049	tags=72%	list=51%	signal=35%	Rpa3/Nfrkb/Pias1/Actr8/Rad23a/Ddb1/Actr5/Actb/Ercc2/Ubb/Cops5/Ercc5/Ube2n/Ercc4/Tfpt/Actl6a/Ino80c/Cdk7/Ruvbl1/Pcna/Pole2/Xpc/Pold4/Sumo1/Rfc5/Gps1/Ino80e/Uba52/Sumo3/Rbx1/Rfc1/Mcrs1/Rnf111/Sumo2/Pold2/Cops8/Rfc2/Cops4/Gtf2h4/Pias3/Pole3/Pole4/Ube2v2/Gtf2h3/Ino80b/Rpa2/Mnat1/Cops7b/Ccnh/Ddb2/Xpa/Cetn2/Rfc4/Rps27a/Rpa1/Pold1/Parp1/Rfc3
REACTOME_G2_M_DNA_DAMAGE_CHECKPOINT	REACTOME_G2_M_DNA_DAMAGE_CHECKPOINT	88	-0.398435	-1.39901	0.0388834	0.282752	0.251104	4384	tags=38%	list=25%	signal=28%	H2ax/H4c9/Rmi1/H2bc15/Chek1/Top3a/Ube2v2/Trp53/Rnf8/Rhno1/Atm/Rpa2/Trp53bp1/H4c12/Mdc1/Topbp1/H2bc13/H4c6/Brca1/H2bc22/Rfc4/Bard1/Dna2/Rpa1/Atrip/Rad9a/H2bc8/Blm/Rfc3/H2bc23/H2bc24/H4c18/H2bc11
REACTOME_RNA_POLYMERASE_III_TRANSCRIPTION_INITIATION_FROM_TYPE_3_PROMOTER	REACTOME_RNA_POLYMERASE_III_TRANSCRIPTION_INITIATION_FROM_TYPE_3_PROMOTER	26	-0.487004	-1.40285	0.0848153	0.425419	0.377803	6849	tags=69%	list=39%	signal=43%	Polr2f/Tbp/Polr3a/Polr3gl/Snapc5/Brf2/Polr3g/Crcp/Polr2k/Polr2e/Polr3e/Polr2l/Polr1c/Polr3k/Snapc2/Polr3h/Polr2h/Snapc4
REACTOME_REGULATION_OF_TP53_ACTIVITY_THROUGH_PHOSPHORYLATION	REACTOME_REGULATION_OF_TP53_ACTIVITY_THROUGH_PHOSPHORYLATION	91	-0.401497	-1.41826	0.0310617	0.280208	0.248845	6742	tags=54%	list=38%	signal=34%	Pin1/Rfc5/Taf9/Rad50/Uba52/Tbp/Prkag1/Taf6/Rad17/Brip1/Kat5/Aurka/Trp53inp1/Cdk2/Rfc2/Supt16/Taf10/Chek2/Ccna1/Prkag3/Taf11/Rmi1/Stk11/Noc2l/Chek1/Top3a/Trp53/Rhno1/Taf9b/Ssrp1/Atm/Taf7/Rpa2/Taf15/Topbp1/Brca1/Rfc4/Rps27a/Taf5/Bard1/Dna2/Rpa1/Atrip/Rad9a/Mapk11/Cdk5r1/Blm/Rfc3/Trp53rkb
REACTOME_TRANSLESION_SYNTHESIS_BY_Y_FAMILY_DNA_POLYMERASES_BYPASSES_LESIONS_ON_DNA_TEMPLATE	REACTOME_TRANSLESION_SYNTHESIS_BY_Y_FAMILY_DNA_POLYMERASES_BYPASSES_LESIONS_ON_DNA_TEMPLATE	39	-0.458947	-1.41828	0.0513514	0.322072	0.286023	6992	tags=59%	list=39%	signal=36%	Uba7/Pcna/Pole2/Pold4/Rfc5/Uba52/Rfc1/Polh/Ube2l6/Pold2/Rfc2/Pclaf/Pole3/Pole4/Rpa2/Mad2l2/Rfc4/Rps27a/Rpa1/Pold1/Isg15/Rfc3/Poli
REACTOME_CD28_CO_STIMULATION	REACTOME_CD28_CO_STIMULATION	33	-0.470394	-1.41878	0.0549451	0.330286	0.293318	2272	tags=30%	list=13%	signal=26%	Pak3/Lyn/Map3k14/Fyn/Cd86/Lck/Cd28/Grap2/Map3k8/Cd80
REACTOME_RNA_POLYMERASE_I_TRANSCRIPTION	REACTOME_RNA_POLYMERASE_I_TRANSCRIPTION	42	-0.455195	-1.4217	0.0483871	0.312211	0.277266	7156	tags=67%	list=40%	signal=40%	Mta2/Cdk7/Polr2f/Rrn3/Tbp/Polr1e/Rbbp7/Ttf1/Gatad2a/Mta1/Polr2k/Polr2e/Ehmt2/Taf1a/Polr2l/Polr1c/Gtf2h4/Chd4/Polr1a/Rbbp4/Ubtf/Taf1c/Mbd3/Gtf2h3/Mnat1/Ccnh/Polr2h/Taf1b
REACTOME_TRANSPORT_OF_MATURE_TRANSCRIPT_TO_CYTOPLASM	REACTOME_TRANSPORT_OF_MATURE_TRANSCRIPT_TO_CYTOPLASM	77	-0.411274	-1.42677	0.0374481	0.282752	0.251104	7826	tags=57%	list=44%	signal=32%	Rnps1/Nxf7/Seh1l/Ddx39a/Casc3/Aaas/Thoc1/Nup62/Ndc1/Cpsf3/Nup153/U2af1l4/Thoc7/Nup35/Srsf1/Ddx39b/Fyttd1/Eif4a3/Pom121/Fip1l1/Srsf3/Nup93/Nup214/Sarnp/Alyref/Srsf2/Nup85/Thoc3/Nxf2/Srsf7/Slbp/Nup133/Chtop/Srsf9/Cpsf4/Rbm8a/Gle1/U2af1/Nup155/Nup107/Magoh/Rae1/Nxt1/Nup210
REACTOME_DNA_DOUBLE_STRAND_BREAK_RESPONSE	REACTOME_DNA_DOUBLE_STRAND_BREAK_RESPONSE	73	-0.413808	-1.42703	0.039075	0.282752	0.251104	4384	tags=33%	list=25%	signal=25%	H2ax/H4c9/H2bc15/Ube2v2/Trp53/Rnf8/Atm/Trp53bp1/H4c12/Mdc1/H2bc13/H4c6/Brca1/H2bc22/Rps27a/Eya1/Bard1/H2bc8/H2bc23/H2bc24/H4c18/Eya4/Eya2/H2bc11
REACTOME_DNA_REPLICATION_PRE_INITIATION	REACTOME_DNA_REPLICATION_PRE_INITIATION	98	-0.400808	-1.42847	0.0281786	0.280208	0.248845	8225	tags=61%	list=46%	signal=33%	Psmd9/Anapc11/Kpnb1/Psmb4/Psma2/Psmf1/Psmc3/Anapc4/Anapc7/Kpna1/Mcm2/Psmd5/Psmc1/Psme1/Pole2/Cdc23/Psmd13/Prim1/Psmb10/Psma4/Uba52/Psmb1/Prim2/Psmc4/Cdc45/Psmd4/Ube2e1/Psmb5/Psma6/Mcm5/Psmc5/Psmb6/Cdk2/Ube2s/Anapc16/Anapc10/Cdc26/Orc3/Psmd10/Psme2/Psmb8/Pole3/Ube2c/Pole4/Mcm7/Rpa2/Mcm6/Cdc6/Cdt1/Ube2d1/Mcm4/Mcm3/Pola1/Cdc16/Rps27a/Mcm8/Rpa1/Orc6/Psme2b/Orc1
REACTOME_POLYMERASE_SWITCHING_ON_THE_C_STRAND_OF_THE_TELOMERE	REACTOME_POLYMERASE_SWITCHING_ON_THE_C_STRAND_OF_THE_TELOMERE	25	-0.505767	-1.43574	0.06639	0.369683	0.328305	6913	tags=76%	list=39%	signal=46%	Ten1/Pcna/Pold4/Rfc5/Prim1/Prim2/Chtf8/Rfc1/Pold2/Acd/Rfc2/Chtf18/Pola1/Rfc4/Ctc1/Pold1/Dscc1/Pot1a/Rfc3
REACTOME_DNA_DAMAGE_BYPASS	REACTOME_DNA_DAMAGE_BYPASS	48	-0.448042	-1.43838	0.04047	0.28368	0.251928	7153	tags=56%	list=40%	signal=34%	Usp1/Uba7/Pcna/Pole2/Pold4/Rfc5/Uba52/Rbx1/Rfc1/Polh/Ube2l6/Pold2/Rfc2/Dtl/Pclaf/Pole3/Pole4/Rpa2/Mad2l2/Rad18/Rfc4/Rps27a/Rpa1/Pold1/Isg15/Rfc3/Poli
REACTOME_TNF_RECEPTOR_SUPERFAMILY_TNFSF_MEMBERS_MEDIATING_NON_CANONICAL_NF_KB_PATHWAY	REACTOME_TNF_RECEPTOR_SUPERFAMILY_TNFSF_MEMBERS_MEDIATING_NON_CANONICAL_NF_KB_PATHWAY	17	-0.560509	-1.44041	0.0554745	0.330286	0.293318	3886	tags=59%	list=22%	signal=46%	Traf3/Tnfrsf11a/Birc3/Map3k14/Cd40/Tnfsf11/Lta/Tnfsf14/Tnfrsf13c/Ltb
REACTOME_RECOGNITION_OF_DNA_DAMAGE_BY_PCNA_CONTAINING_REPLICATION_COMPLEX	REACTOME_RECOGNITION_OF_DNA_DAMAGE_BY_PCNA_CONTAINING_REPLICATION_COMPLEX	30	-0.488924	-1.4407	0.0529986	0.325563	0.289124	7153	tags=67%	list=40%	signal=40%	Usp1/Pcna/Pole2/Pold4/Rfc5/Uba52/Rbx1/Rfc1/Pold2/Rfc2/Dtl/Pole3/Pole4/Rpa2/Rad18/Rfc4/Rps27a/Rpa1/Pold1/Rfc3
REACTOME_DUAL_INCISION_IN_GG_NER	REACTOME_DUAL_INCISION_IN_GG_NER	41	-0.463413	-1.44192	0.042953	0.294209	0.261279	6911	tags=54%	list=39%	signal=33%	Pcna/Pole2/Pold4/Rfc5/Uba52/Rbx1/Rfc1/Pold2/Rfc2/Gtf2h4/Pole3/Pole4/Gtf2h3/Rpa2/Ddb2/Xpa/Rfc4/Rps27a/Rpa1/Pold1/Parp1/Rfc3
REACTOME_HOMOLOGOUS_DNA_PAIRING_AND_STRAND_EXCHANGE	REACTOME_HOMOLOGOUS_DNA_PAIRING_AND_STRAND_EXCHANGE	26	-0.502509	-1.44751	0.0683995	0.373135	0.331371	4606	tags=65%	list=26%	signal=48%	Xrcc2/Rad51/Rad50/Brip1/Kat5/Rad51ap1/Rad51b/Rmi1/Chek1/Top3a/Atm/Rad51d/Brca1/Bard1/Dna2/Blm/Brca2
REACTOME_ANTIMICROBIAL_PEPTIDES	REACTOME_ANTIMICROBIAL_PEPTIDES	58	-0.436781	-1.44814	0.0375865	0.282752	0.251104	5201	tags=50%	list=29%	signal=35%	Defa43/Defa37/Defa5/Defa36/Itln1/Defa42/Leap2/Defa41/Defa29/Lcn2/Pglyrp1/Chga/Defa34/Bpifb6/Camp/Defa35/Defa21/Defa22/Reg3d/Cd4/Lyz2/Clu/Rnase6/Reg3g/Ccr6/Pglyrp2/Reg3b/Defa32/Reg3a
REACTOME_RNA_POLYMERASE_III_TRANSCRIPTION_INITIATION_FROM_TYPE_1_PROMOTER	REACTOME_RNA_POLYMERASE_III_TRANSCRIPTION_INITIATION_FROM_TYPE_1_PROMOTER	27	-0.502161	-1.45359	0.0651872	0.365615	0.324693	6849	tags=70%	list=39%	signal=43%	Polr2f/Tbp/Polr3a/Polr3gl/Polr3g/Brf1/Gtf3c6/Crcp/Gtf3c5/Polr2k/Polr2e/Polr3e/Polr2l/Polr1c/Polr3k/Gtf3c3/Polr3h/Gtf3a/Polr2h
REACTOME_SUMOYLATION_OF_RNA_BINDING_PROTEINS	REACTOME_SUMOYLATION_OF_RNA_BINDING_PROTEINS	45	-0.460875	-1.45503	0.0329444	0.280208	0.248845	7653	tags=67%	list=43%	signal=38%	Seh1l/Phc1/Phc2/Hnrnpc/Aaas/Nop58/Sumo1/Nup62/Ndc1/Nup153/Ring1/Hnrnpk/Nup35/Bmi1/Pom121/Phc3/Sumo2/Cbx8/Rnf2/Nup93/Nup214/Pcgf2/Nup85/Nup133/Cbx4/Nup155/Nup107/Rae1/Cbx2/Nup210
REACTOME_BUTYRATE_RESPONSE_FACTOR_1_BRF1_BINDS_AND_DESTABILIZES_MRNA	REACTOME_BUTYRATE_RESPONSE_FACTOR_1_BRF1_BINDS_AND_DESTABILIZES_MRNA	17	-0.566531	-1.45588	0.0540146	0.329191	0.292346	7258	tags=76%	list=41%	signal=45%	Dcp1a/Dcp2/Exosc2/Exosc3/Exosc1/Exosc7/Xrn1/Exosc8/Zfp36l1/Exosc4/Exosc6/Exosc9/Exosc5
REACTOME_TERMINATION_OF_TRANSLESION_DNA_SYNTHESIS	REACTOME_TERMINATION_OF_TRANSLESION_DNA_SYNTHESIS	32	-0.483764	-1.45819	0.046133	0.307818	0.273365	6992	tags=69%	list=39%	signal=42%	Uba7/Pcna/Pole2/Pold4/Rfc5/Uba52/Rfc1/Polh/Ube2l6/Pold2/Rfc2/Pclaf/Pole3/Pole4/Rpa2/Rfc4/Rps27a/Rpa1/Pold1/Isg15/Rfc3/Poli
REACTOME_TOLL_LIKE_RECEPTOR_9_TLR9_CASCADE	REACTOME_TOLL_LIKE_RECEPTOR_9_TLR9_CASCADE	96	-0.409302	-1.46202	0.0222535	0.249626	0.221686	3612	tags=25%	list=20%	signal=20%	Alpk1/Skp1/Irf7/Cd14/Dusp7/S100b/Peli3/Irf5/Rps27a/Rps6ka5/Ripk2/Nod1/Nfkbia/Nlrc5/Mapk11/Tnip2/Nfkb2/Ager/Tifa/Map3k8/Map2k6/Tasl/Mapk10/Tlr9
REACTOME_RA_BIOSYNTHESIS_PATHWAY	REACTOME_RA_BIOSYNTHESIS_PATHWAY	21	-0.536757	-1.46436	0.0446927	0.300802	0.267134	219	tags=19%	list=1%	signal=19%	Adh4/Rdh1/Crabp1/Sdr16c5
REACTOME_HDR_THROUGH_SINGLE_STRAND_ANNEALING_SSA	REACTOME_HDR_THROUGH_SINGLE_STRAND_ANNEALING_SSA	36	-0.48501	-1.46788	0.0327384	0.280208	0.248845	4190	tags=42%	list=24%	signal=32%	Rmi1/Top3a/Rhno1/Atm/Rpa2/Topbp1/Brca1/Rfc4/Bard1/Dna2/Rpa1/Atrip/Rad9a/Blm/Rfc3
REACTOME_THE_PHOTOTRANSDUCTION_CASCADE	REACTOME_THE_PHOTOTRANSDUCTION_CASCADE	29	-0.499787	-1.46889	0.0529986	0.325563	0.289124	2002	tags=17%	list=11%	signal=15%	Sag/Rho/Ppef1/Rgs9bp/Cnga1
REACTOME_RNA_POLYMERASE_I_TRANSCRIPTION_TERMINATION	REACTOME_RNA_POLYMERASE_I_TRANSCRIPTION_TERMINATION	27	-0.507976	-1.47043	0.0610264	0.354396	0.314729	7154	tags=70%	list=40%	signal=42%	Cdk7/Polr2f/Tbp/Polr1e/Ttf1/Polr2k/Polr2e/Taf1a/Polr2l/Polr1c/Gtf2h4/Polr1a/Ubtf/Taf1c/Gtf2h3/Mnat1/Ccnh/Polr2h/Taf1b
REACTOME_TCR_SIGNALING	REACTOME_TCR_SIGNALING	104	-0.411488	-1.48484	0.00954	0.147189	0.130714	6624	tags=62%	list=37%	signal=39%	Plcg2/Psmd9/Psmb4/Psma2/Psmf1/Psmc3/Bcl10/Ube2n/Nfkb1/Nck1/Psmd5/Psmc1/H2-Aa/Cdc34/Ube2d2a/Psme1/Ikbkb/H2-Ab1/Psmd13/Psmb10/Psma4/Rela/Uba52/Psmb1/Psma8/Psmc4/Psmd4/H2-Eb1/Plcg1/Psmb5/Psma6/Psmc5/Psmb6/Pag1/Csk/Psmd10/Psme2/Psmb8/Lcp2/Pak3/Skp1/Cd101/Inpp5d/Ube2d1/Cd4/Zap70/Rps27a/Malt1/Ripk2/Ptprc/Nfkbia/Trat1/Cd3e/Lck/Psme2b/Grap2/Lat/Itk/Cd247/Prkcq/H2-Eb2/Cd3g/Cd3d/Card11
REACTOME_RNA_POLYMERASE_III_TRANSCRIPTION	REACTOME_RNA_POLYMERASE_III_TRANSCRIPTION	34	-0.491417	-1.48579	0.0383562	0.282752	0.251104	6849	tags=68%	list=39%	signal=42%	Polr2f/Tbp/Polr3a/Polr3gl/Snapc5/Brf2/Polr3g/Brf1/Gtf3c6/Crcp/Gtf3c5/Polr2k/Polr2e/Polr3e/Polr2l/Polr1c/Polr3k/Gtf3c3/Snapc2/Polr3h/Gtf3a/Polr2h/Snapc4
REACTOME_DUAL_INCISION_IN_TC_NER	REACTOME_DUAL_INCISION_IN_TC_NER	61	-0.445509	-1.48922	0.0242003	0.250912	0.222828	7944	tags=67%	list=45%	signal=37%	Polr2c/Ercc4/Tcea1/Xab2/Aqr/Polr2i/Polr2b/Cdk7/Pcna/Polr2f/Pole2/Pold4/Rfc5/Zfp830/Uba52/Rbx1/Rfc1/Pold2/Polr2k/Polr2e/Rfc2/Polr2l/Prpf19/Gtf2h4/Pole3/Isy1/Ercc8/Pole4/Gtf2h3/Rpa2/Mnat1/Ccnh/Polr2d/Polr2g/Xpa/Polr2h/Rfc4/Rps27a/Rpa1/Pold1/Rfc3
REACTOME_GAP_JUNCTION_ASSEMBLY	REACTOME_GAP_JUNCTION_ASSEMBLY	30	-0.507712	-1.49607	0.0348675	0.282752	0.251104	2099	tags=27%	list=12%	signal=24%	Tubb1/Gjd3/Tubb2b/Gjb6/Gja4/Gjd2/Tuba8/Gja5
REACTOME_S_PHASE	REACTOME_S_PHASE	146	-0.398584	-1.49624	0.00492595	0.0939948	0.0834742	8225	tags=63%	list=46%	signal=34%	Psmd9/Anapc11/Psmb4/Psma2/Psmf1/Psmc3/Anapc4/Anapc7/Mcm2/Akt2/Psmd5/Psmc1/Smc1a/Gins4/Smc3/Psme1/Esco1/Cdk7/Stag1/Pcna/Esco2/Fen1/Pole2/Pold4/Cdc23/Rfc5/Psmd13/Prim1/Psmb10/Psma4/Uba52/Psmb1/Prim2/Psma8/Psmc4/Psmd4/Ube2e1/Rbx1/Rfc1/Cdca5/Psmb5/Psma6/Pold2/Mcm5/Psmc5/Psmb6/Cdk2/Ube2s/Anapc16/Anapc10/Rfc2/Cdc26/Orc3/Akt3/Psmd10/Psme2/Cdk4/Psmb8/Ccna1/Pole3/Cks1b/Ube2c/Ccnd1/Pole4/Skp1/Mcm7/Rpa2/Mna…
REACTOME_NUCLEOTIDE_EXCISION_REPAIR	REACTOME_NUCLEOTIDE_EXCISION_REPAIR	105	-0.416895	-1.50442	0.00847275	0.136623	0.121331	7944	tags=62%	list=45%	signal=34%	Polr2c/Ube2n/Ercc4/Tcea1/Xab2/Aqr/Polr2i/Tfpt/Actl6a/Ino80c/Polr2b/Cdk7/Ruvbl1/Pcna/Polr2f/Pole2/Xpc/Pold4/Sumo1/Rfc5/Zfp830/Gps1/Ino80e/Uba52/Sumo3/Rbx1/Rfc1/Mcrs1/Rnf111/Sumo2/Pold2/Polr2k/Polr2e/Cops8/Rfc2/Polr2l/Prpf19/Cops4/Gtf2h4/Pias3/Pole3/Lig3/Isy1/Ercc8/Pole4/Ube2v2/Xrcc1/Gtf2h3/Ino80b/Rpa2/Mnat1/Cops7b/Ccnh/Ddb2/Polr2d/Polr2g/Xpa/Polr2h/Cetn2/Rfc4/Rps27a/Rpa1/Pold1/Parp1/Rfc3
REACTOME_PROCESSING_OF_DNA_DOUBLE_STRAND_BREAK_ENDS	REACTOME_PROCESSING_OF_DNA_DOUBLE_STRAND_BREAK_ENDS	91	-0.426895	-1.50797	0.00978492	0.147189	0.130714	4486	tags=41%	list=25%	signal=31%	Ccna1/H2ax/H4c9/Rmi1/H2bc15/Chek1/Top3a/Ube2v2/Rnf8/Rhno1/Timeless/Atm/Rpa2/Trp53bp1/H4c12/Mdc1/Topbp1/H2bc13/H4c6/Brca1/H2bc22/Tipin/Rfc4/Rps27a/Bard1/Dna2/Rpa1/Atrip/Rad9a/H2bc8/Blm/Clspn/Rfc3/H2bc23/H2bc24/H4c18/H2bc11
REACTOME_RAP1_SIGNALLING	REACTOME_RAP1_SIGNALLING	15	-0.613903	-1.5151	0.0394537	0.282752	0.251104	1958	tags=27%	list=11%	signal=24%	Rasgrp2/Sipa1/Rasgrp1/Rapgef4
REACTOME_IMMUNOREGULATORY_INTERACTIONS_BETWEEN_A_LYMPHOID_AND_A_NON_LYMPHOID_CELL	REACTOME_IMMUNOREGULATORY_INTERACTIONS_BETWEEN_A_LYMPHOID_AND_A_NON_LYMPHOID_CELL	93	-0.427834	-1.52064	0.0107638	0.151476	0.134522	2634	tags=34%	list=15%	signal=29%	H2-Q7/Icam2/Cd8a/H2-M3/Cd96/Cd8b1/Itgb2/Vcam1/Col17a1/Cd40/Treml4/Madcam1/H2-Q6/Cd1d1/Cd3e/Slamf7/Treml2/Icam1/Sell/Cd247/Trem2/Itgal/Slamf6/Cd22/Itgb7/Cd19/Siglecg/Cd3g/Itga4/Cd3d/Hcst/Ifitm6
REACTOME_DNA_STRAND_ELONGATION	REACTOME_DNA_STRAND_ELONGATION	24	-0.540947	-1.52275	0.0323662	0.280208	0.248845	6911	tags=71%	list=39%	signal=43%	Pcna/Fen1/Pold4/Rfc5/Prim1/Prim2/Rfc1/Pold2/Rfc2/Rpa2/Pola1/Rfc4/Gins3/Dna2/Rpa1/Pold1/Rfc3
REACTOME_VOLTAGE_GATED_POTASSIUM_CHANNELS	REACTOME_VOLTAGE_GATED_POTASSIUM_CHANNELS	39	-0.493573	-1.52529	0.0294598	0.280208	0.248845	1549	tags=26%	list=9%	signal=23%	Kcnab2/Kcnq5/Kcng3/Kcna3/Kcnc3/Kcns1/Kcnc2/Kcnb2/Kcnab3/Kcnc1
REACTOME_TRANSCRIPTION_COUPLED_NUCLEOTIDE_EXCISION_REPAIR_TC_NER	REACTOME_TRANSCRIPTION_COUPLED_NUCLEOTIDE_EXCISION_REPAIR_TC_NER	73	-0.442328	-1.52538	0.0131736	0.169939	0.150918	8415	tags=70%	list=47%	signal=37%	Ercc2/Ubb/Cops5/Ercc5/Polr2c/Ercc4/Tcea1/Xab2/Aqr/Polr2i/Polr2b/Cdk7/Pcna/Polr2f/Pole2/Pold4/Rfc5/Zfp830/Gps1/Uba52/Rbx1/Rfc1/Pold2/Polr2k/Polr2e/Cops8/Rfc2/Polr2l/Prpf19/Cops4/Gtf2h4/Pole3/Lig3/Isy1/Ercc8/Pole4/Xrcc1/Gtf2h3/Rpa2/Mnat1/Cops7b/Ccnh/Polr2d/Polr2g/Xpa/Polr2h/Rfc4/Rps27a/Rpa1/Pold1/Rfc3
REACTOME_TELOMERE_C_STRAND_LAGGING_STRAND_SYNTHESIS	REACTOME_TELOMERE_C_STRAND_LAGGING_STRAND_SYNTHESIS	33	-0.507811	-1.53163	0.0229238	0.249902	0.221931	6913	tags=73%	list=39%	signal=44%	Ten1/Pcna/Fen1/Pold4/Rfc5/Prim1/Prim2/Chtf8/Rfc1/Pold2/Acd/Rfc2/Rpa2/Chtf18/Pola1/Rfc4/Dna2/Rpa1/Ctc1/Pold1/Dscc1/Blm/Pot1a/Rfc3
REACTOME_DNA_REPLICATION	REACTOME_DNA_REPLICATION	125	-0.414506	-1.53321	0.00485643	0.0939948	0.0834742	6911	tags=62%	list=39%	signal=38%	Psmd9/Anapc11/Kpnb1/Psmb4/Psma2/Psmf1/Psmc3/Anapc4/Anapc7/Kpna1/Mcm2/Psmd5/Psmc1/Gins4/Psme1/Pcna/Fen1/Pole2/Pold4/Cdc23/Rfc5/Psmd13/Prim1/Psmb10/Psma4/Uba52/Psmb1/Prim2/Psma8/Psmc4/Cdc45/Psmd4/Ube2e1/Rbx1/Rfc1/Psmb5/Psma6/Pold2/Mcm5/Psmc5/Psmb6/Cdk2/Ube2s/Anapc16/Anapc10/Rfc2/Cdc26/Orc3/Psmd10/Psme2/Psmb8/Ccna1/Pole3/Ube2c/Pole4/Skp1/Mcm7/Rpa2/Mcm6/Ccne1/Cdc6/Cdt1/Ube2d1/Mcm4/Mcm3/Pola1/Cdc16/Rf…
REACTOME_HOMOLOGY_DIRECTED_REPAIR	REACTOME_HOMOLOGY_DIRECTED_REPAIR	130	-0.41354	-1.53334	0.00501098	0.0939948	0.0834742	5939	tags=49%	list=34%	signal=33%	Rad17/Rfc1/Brip1/Uimc1/Kat5/Polh/Sumo2/Pold2/Ppp4c/Cdk2/Rfc2/Nsd2/H2bc21/Rad51ap1/Rad51b/Ccna1/Pole3/Lig3/H2ax/H4c9/Rmi1/H2bc15/Chek1/Top3a/Pole4/Ube2v2/Xrcc1/Eme2/Rnf8/Rhno1/Timeless/Fignl1/Atm/Polq/Rad51d/Rpa2/Trp53bp1/H4c12/Mdc1/Topbp1/H2bc13/H4c6/Brca1/H2bc22/Tipin/Rfc4/Rps27a/Bard1/Mus81/Dna2/Rpa1/Atrip/Pold1/Rad9a/H2bc8/Blm/Parp1/Clspn/Brca2/Rfc3/H2bc23/H2bc24/H4c18/H2bc11
REACTOME_CD28_DEPENDENT_PI3K_AKT_SIGNALING	REACTOME_CD28_DEPENDENT_PI3K_AKT_SIGNALING	22	-0.559405	-1.5373	0.0363128	0.282752	0.251104	2272	tags=32%	list=13%	signal=28%	Map3k14/Fyn/Cd86/Lck/Cd28/Map3k8/Cd80
REACTOME_ACTIVATION_OF_THE_PRE_REPLICATIVE_COMPLEX	REACTOME_ACTIVATION_OF_THE_PRE_REPLICATIVE_COMPLEX	32	-0.51058	-1.53902	0.0242758	0.250912	0.222828	6825	tags=66%	list=39%	signal=40%	Pole2/Prim1/Prim2/Cdc45/Mcm5/Cdk2/Orc3/Pole3/Pole4/Mcm7/Rpa2/Mcm6/Cdc6/Cdt1/Mcm4/Mcm3/Pola1/Mcm8/Rpa1/Orc6/Orc1
REACTOME_RECYCLING_OF_BILE_ACIDS_AND_SALTS	REACTOME_RECYCLING_OF_BILE_ACIDS_AND_SALTS	17	-0.600956	-1.54435	0.0322641	0.280208	0.248845	3550	tags=35%	list=20%	signal=28%	Abcc3/Baat/Abcb11/Slco1a4/Slc27a5/Slco1b2
REACTOME_ANTIGEN_ACTIVATES_B_CELL_RECEPTOR_BCR_LEADING_TO_GENERATION_OF_SECOND_MESSENGERS	REACTOME_ANTIGEN_ACTIVATES_B_CELL_RECEPTOR_BCR_LEADING_TO_GENERATION_OF_SECOND_MESSENGERS	23	-0.558105	-1.54836	0.0310843	0.280208	0.248845	2595	tags=39%	list=15%	signal=33%	Sh3kbp1/Blnk/Trpc1/Cd79a/Btk/Pik3cd/Cd22/Cd19/Cd79b
REACTOME_LAGGING_STRAND_SYNTHESIS	REACTOME_LAGGING_STRAND_SYNTHESIS	20	-0.578317	-1.5525	0.0353107	0.282752	0.251104	6911	tags=80%	list=39%	signal=49%	Pcna/Fen1/Pold4/Rfc5/Prim1/Prim2/Rfc1/Pold2/Rfc2/Rpa2/Pola1/Rfc4/Dna2/Rpa1/Pold1/Rfc3
REACTOME_NETRIN_1_SIGNALING	REACTOME_NETRIN_1_SIGNALING	15	-0.629722	-1.55414	0.0321682	0.280208	0.248845	3158	tags=33%	list=18%	signal=27%	Unc5a/Fyn/Dscam/Prkcq/Dcc
REACTOME_DAP12_SIGNALING	REACTOME_DAP12_SIGNALING	29	-0.528819	-1.55421	0.0299854	0.280208	0.248845	3987	tags=52%	list=22%	signal=40%	Grb2/Klrc3/Plcg1/Klrk1/Syk/Tyrobp/Lcp2/Klrd1/Klrc2/Fyn/Lck/Grap2/Lat/Trem2/Btk
REACTOME_SNRNP_ASSEMBLY	REACTOME_SNRNP_ASSEMBLY	48	-0.486791	-1.56277	0.00898868	0.141985	0.126093	6821	tags=56%	list=38%	signal=35%	Snrpe/Nup62/Ndc1/Nup153/Nup35/Pom121/Nup93/Ddx20/Snrpb/Nup214/Snrpd1/Clns1a/Nup85/Prmt5/Nup133/Snrpf/Gemin7/Wdr77/Nup155/Nup107/Gemin5/Gemin2/Snupn/Rae1/Smn1/Gemin8/Nup210
REACTOME_DNA_REPAIR	REACTOME_DNA_REPAIR	317	-0.392312	-1.5659	4.52415e-05	0.00250121	0.00222125	5949	tags=54%	list=34%	signal=37%	Cdk7/Usp1/Ruvbl1/Xrcc2/Pias4/Rad51/Uba7/Bap1/Babam1/Pcna/Pnkp/Paxip1/Polr2f/Fen1/Pole2/Xpc/Pold4/Sumo1/Rfc5/Zfp830/Gps1/H2bc9/Ino80e/Rad50/H2aj/Uba52/Sumo3/Slx4/Faap24/Eme1/Rnf168/Rbx1/Tdp2/Fto/Rad17/Rfc1/Brip1/Fan1/Mcrs1/Uimc1/Kat5/Polh/Rnf111/Neil3/Fancf/Ube2l6/Sumo2/Pold2/Polb/Polr2k/Polr2e/Ppp4c/Cops8/Cdk2/Acd/Mpg/Ubxn1/Rfc2/Nsd2/Dtl/Polr2l/Cenpx/H2ac15/Pclaf/Apex1/Prpf19/Cops4/Gtf2h4/Pias3/C…
REACTOME_ACTIVATION_OF_ATR_IN_RESPONSE_TO_REPLICATION_STRESS	REACTOME_ACTIVATION_OF_ATR_IN_RESPONSE_TO_REPLICATION_STRESS	36	-0.518833	-1.57024	0.0129688	0.169939	0.150918	3488	tags=67%	list=20%	signal=54%	Cdc25c/Rfc5/Cdc45/Rad17/Mcm5/Cdk2/Rfc2/Orc3/Chek1/Mcm7/Rpa2/Mcm6/Cdc6/Mcm4/Mcm3/Rfc4/Mcm8/Rpa1/Orc6/Atrip/Rad9a/Clspn/Rfc3/Orc1
REACTOME_HDR_THROUGH_HOMOLOGOUS_RECOMBINATION_HRR	REACTOME_HDR_THROUGH_HOMOLOGOUS_RECOMBINATION_HRR	57	-0.47677	-1.57619	0.0130218	0.169939	0.150918	7131	tags=68%	list=40%	signal=41%	Xrcc2/Rad51/Pcna/Pole2/Pold4/Rfc5/Rad50/Uba52/Slx4/Eme1/Rfc1/Brip1/Kat5/Polh/Pold2/Rfc2/Rad51ap1/Rad51b/Pole3/Rmi1/Chek1/Top3a/Pole4/Eme2/Fignl1/Atm/Rad51d/Rpa2/Brca1/Rfc4/Rps27a/Bard1/Mus81/Dna2/Rpa1/Pold1/Blm/Brca2/Rfc3
REACTOME_CRMPS_IN_SEMA3A_SIGNALING	REACTOME_CRMPS_IN_SEMA3A_SIGNALING	15	-0.644136	-1.58972	0.0228156	0.249902	0.221931	1815	tags=47%	list=10%	signal=42%	Dpysl3/Fyn/Cdk5r1/Crmp1/Plxna4/Dpysl5/Plxna3
REACTOME_EXTENSION_OF_TELOMERES	REACTOME_EXTENSION_OF_TELOMERES	48	-0.49528	-1.59003	0.00714238	0.120178	0.106727	6913	tags=69%	list=39%	signal=42%	Ten1/Pcna/Fen1/Pold4/Rfc5/Prim1/Rtel1/Prim2/Chtf8/Rfc1/Ppp6c/Pold2/Shq1/Cdk2/Acd/Rfc2/Gar1/Ccna1/Rpa2/Pif1/Chtf18/Nop10/Pola1/Tert/Rfc4/Dna2/Rpa1/Ctc1/Pold1/Dscc1/Blm/Pot1a/Rfc3
REACTOME_PCNA_DEPENDENT_LONG_PATCH_BASE_EXCISION_REPAIR	REACTOME_PCNA_DEPENDENT_LONG_PATCH_BASE_EXCISION_REPAIR	21	-0.585593	-1.59759	0.018492	0.213624	0.189713	6911	tags=81%	list=39%	signal=49%	Pcna/Fen1/Pole2/Pold4/Rfc5/Rfc1/Pold2/Polb/Rfc2/Apex1/Pole3/Pole4/Rpa2/Rfc4/Rpa1/Pold1/Rfc3
REACTOME_RESOLUTION_OF_AP_SITES_VIA_THE_MULTIPLE_NUCLEOTIDE_PATCH_REPLACEMENT_PATHWAY	REACTOME_RESOLUTION_OF_AP_SITES_VIA_THE_MULTIPLE_NUCLEOTIDE_PATCH_REPLACEMENT_PATHWAY	24	-0.569621	-1.60347	0.0175581	0.209076	0.185675	6911	tags=75%	list=39%	signal=46%	Pcna/Fen1/Pole2/Pold4/Rfc5/Rfc1/Pold2/Polb/Rfc2/Apex1/Pole3/Pole4/Rpa2/Rfc4/Rpa1/Pold1/Parp1/Rfc3
REACTOME_DNA_DOUBLE_STRAND_BREAK_REPAIR	REACTOME_DNA_DOUBLE_STRAND_BREAK_REPAIR	160	-0.424225	-1.60706	0.000517414	0.0174121	0.0154632	4606	tags=57%	list=26%	signal=43%	Bap1/Babam1/Pcna/Paxip1/Fen1/Pole2/Pold4/Sumo1/Rfc5/H2bc9/Rad50/Uba52/Slx4/Eme1/Rnf168/Tdp2/Rad17/Rfc1/Brip1/Uimc1/Kat5/Polh/Sumo2/Pold2/Ppp4c/Cdk2/Ubxn1/Rfc2/Nsd2/Chek2/H2bc21/Rad51ap1/Rad51b/Ccna1/Pole3/Lig3/H2ax/H4c9/Rmi1/H2bc15/Chek1/Xrcc5/Top3a/Pole4/Ube2v2/Xrcc1/Trp53/Eme2/Rnf8/Rhno1/Timeless/Xrcc4/Fignl1/Atm/Polq/Rad51d/Rpa2/Rif1/Trp53bp1/H4c12/Mdc1/Topbp1/Tdp1/H2bc13/H4c6/Brca1/H2bc22/Prk…
REACTOME_NUCLEOTIDE_BINDING_DOMAIN_LEUCINE_RICH_REPEAT_CONTAINING_RECEPTOR_NLR_SIGNALING_PATHWAYS	REACTOME_NUCLEOTIDE_BINDING_DOMAIN_LEUCINE_RICH_REPEAT_CONTAINING_RECEPTOR_NLR_SIGNALING_PATHWAYS	45	-0.510046	-1.61027	0.00687028	0.119547	0.106166	3285	tags=33%	list=19%	signal=27%	Tnfaip3/Pstpip1/Birc3/P2rx7/Aim2/Rps27a/Ripk2/Nod1/Nlrp3/Mapk11/Nlrp1a/Map2k6/Casp4/Bcl2/Mefv
REACTOME_MRNA_SPLICING	REACTOME_MRNA_SPLICING	194	-0.417516	-1.6123	0.00040808	0.0157927	0.0140251	8423	tags=68%	list=48%	signal=36%	Tra2b/Wdr70/Smndc1/U2af2/Tcerg1/Sde2/Syf2/Hnrnpl/Snrpd2/Ddx23/Rbm22/Polr2c/Rnps1/Ppwd1/Xab2/Aqr/Cactin/Rbm39/Cherp/Polr2i/Snrpc/Nsrp1/Nkap/Acin1/Dhx9/Dhx16/Sf3b4/Crnkl1/Ddx42/Snrpd3/Ptbp1/Sf1/Ik/Mtrex/Casc3/Polr2b/Hnrnpc/Snrpa/Gpkow/Lsm6/Cwc22/Sf3b3/Ddx46/Rbm42/Polr2f/Snrpe/Zrsr2/Zfp830/Hnrnph1/U2af1l4/Plrg1/Snrnp70/Hnrnpk/Ybx1/Hnrnph2/Hnrnpa3/Ccdc12/Ubl5/Lsm4/Srsf1/Bud31/Ddx39b/Rbm17/Prcc/Eif4a3…
REACTOME_SUMOYLATION_OF_DNA_DAMAGE_RESPONSE_AND_REPAIR_PROTEINS	REACTOME_SUMOYLATION_OF_DNA_DAMAGE_RESPONSE_AND_REPAIR_PROTEINS	73	-0.470755	-1.62342	0.00417329	0.0873008	0.0775295	7780	tags=68%	list=44%	signal=39%	Rad52/Seh1l/Phc1/Phc2/Smc1a/Smc3/Aaas/Stag1/Pias4/Xpc/Sumo1/Nup62/Ndc1/Nup153/Ring1/Sumo3/Nup35/Smc5/Rnf168/Bmi1/Pom121/Phc3/Sumo2/Cbx8/Rnf2/Nup93/Nsmce3/Nsmce1/Pml/Nup214/Pcgf2/Nup85/Nsmce2/Nup133/Cbx4/Nup155/Nup107/Xrcc4/Mdc1/Brca1/Rae1/Sp100/Cetn2/Rpa1/Cbx2/Eid3/Blm/Hdac7/Parp1/Nup210
REACTOME_PROCESSING_OF_CAPPED_INTRON_CONTAINING_PRE_MRNA	REACTOME_PROCESSING_OF_CAPPED_INTRON_CONTAINING_PRE_MRNA	261	-0.413328	-1.6268	2.76245e-05	0.00164472	0.00146063	7826	tags=60%	list=44%	signal=34%	Rnps1/Ppwd1/Xab2/Aqr/Nxf7/Cactin/Rbm39/Cherp/Polr2i/Seh1l/Snrpc/Nsrp1/Nkap/Acin1/Dhx9/Nudt21/Mettl14/Dhx16/Sf3b4/Crnkl1/Ddx42/Snrpd3/Ptbp1/Sf1/Ik/Ddx39a/Clp1/Mtrex/Casc3/Polr2b/Mettl3/Hnrnpc/Snrpa/Gpkow/Aaas/Lsm6/Cwc22/Sf3b3/Thoc1/Ddx46/Rbm42/Polr2f/Snrpe/Zrsr2/Nup62/Ndc1/Zfp830/Cpsf3/Nup153/Hnrnph1/Cpsf7/U2af1l4/Plrg1/Snrnp70/Thoc7/Hnrnpk/Ybx1/Nup35/Hnrnph2/Hnrnpa3/Ccdc12/Ubl5/Lsm4/Srsf1/Bud31/D…
REACTOME_PD_1_SIGNALING	REACTOME_PD_1_SIGNALING	16	-0.646519	-1.62759	0.0164367	0.201822	0.179233	4902	tags=75%	list=28%	signal=54%	Ptpn6/Csk/Cd274/Pdcd1lg2/Cd4/Pdcd1/Cd3e/Lck/Cd247/H2-Eb2/Cd3g/Cd3d
REACTOME_ACTIVATION_OF_THE_MRNA_UPON_BINDING_OF_THE_CAP_BINDING_COMPLEX_AND_EIFS_AND_SUBSEQUENT_BINDING_TO_43S	REACTOME_ACTIVATION_OF_THE_MRNA_UPON_BINDING_OF_THE_CAP_BINDING_COMPLEX_AND_EIFS_AND_SUBSEQUENT_BINDING_TO_43S	60	-0.495689	-1.65529	0.00495302	0.0939948	0.0834742	7242	tags=75%	list=41%	signal=45%	Rps25/Pabpc1/Eif3b/Eif3f/Eif3d/Eif4a2/Eif3h/Eif3e/Rps2/Eif3m/Eif2s3x/Rps27l/Eif3g/Rps7/Eif3k/Rps17/Rps8/Fau/Eif3i/Rps5/Rps11/Rps16/Rps4x/Rps3/Rps6/Rps18/Rps15/Rpsa/Rps26/Rps24/Rps20/Rps9/Rps3a1/Rps19/Rps23/Rps12/Rps28/Rps10/Rps14/Rps13/Rps27a/Rps29/Rps21/Rps15a/Rps27
REACTOME_COSTIMULATION_BY_THE_CD28_FAMILY	REACTOME_COSTIMULATION_BY_THE_CD28_FAMILY	61	-0.501072	-1.67495	0.0023004	0.0556409	0.0494132	2521	tags=28%	list=14%	signal=24%	Ctla4/Cd4/Map3k14/Fyn/Cd86/Pdcd1/Cd3e/Lck/Cd28/Grap2/Cd247/Map3k8/Cd80/Icosl/H2-Eb2/Cd3g/Cd3d
REACTOME_ROS_AND_RNS_PRODUCTION_IN_PHAGOCYTES	REACTOME_ROS_AND_RNS_PRODUCTION_IN_PHAGOCYTES	32	-0.559607	-1.6868	0.00510049	0.0939948	0.0834742	2181	tags=38%	list=12%	signal=33%	Atp6v1g3/Ncf2/Ncf4/Ncf1/Rac2/Cybb/Atp6v0d2/Cyba/Hvcn1/Lpo/Atp6v1g2/Nos2
REACTOME_PHOSPHORYLATION_OF_CD3_AND_TCR_ZETA_CHAINS	REACTOME_PHOSPHORYLATION_OF_CD3_AND_TCR_ZETA_CHAINS	15	-0.711248	-1.75535	0.00261439	0.0613194	0.0544561	2296	tags=53%	list=13%	signal=46%	Cd4/Ptprc/Cd3e/Lck/Cd247/H2-Eb2/Cd3g/Cd3d
REACTOME_RESOLUTION_OF_ABASIC_SITES_AP_SITES	REACTOME_RESOLUTION_OF_ABASIC_SITES_AP_SITES	37	-0.576463	-1.75607	0.00221778	0.0553729	0.0491752	6911	tags=76%	list=39%	signal=46%	Pcna/Pnkp/Fen1/Pole2/Pold4/Rfc5/Rfc1/Pold2/Polb/Mpg/Rfc2/Apex1/Mutyh/Pole3/Lig3/Ung/Pole4/Xrcc1/Neil2/Rpa2/Neil1/Nthl1/Rfc4/Rpa1/Pold1/Parp1/Rfc3/Mbd4
REACTOME_TRANSLATION	REACTOME_TRANSLATION	225	-0.458785	-1.78449	5.5001e-07	7.09513e-05	6.301e-05	7349	tags=67%	list=41%	signal=40%	Mrps6/Mrpl54/Mrpl16/Eif5/Rps25/Pabpc1/Mrps23/Rpl15/Eif3b/Rpl6/Eif3f/Mrpl58/Eif3d/Mrps7/Mrps22/Eif4a2/Eif3h/Srp68/Uba52/Rpl4/Eef1d/Mrpl22/Mrpl24/Rpl10/Eif3e/Mrpl2/Srp14/Mrpl57/Mrpl13/Rps2/Rpl23a/Srp54a/Mrpl19/Eif3m/Rpl18/Mrpl36/Mrps18b/Eef1a1/Eif2s3x/Mrpl15/Mrpl28/Rpl3/Gspt2/Srp19/Rpl7a/Rps27l/Mrpl30/Rpl7/Rpl28/Ppa1/Eef1g/Eif3g/Mrps24/Rplp0/Eif2b3/Gadd45gip1/Rps7/Mrpl14/Mtrf1l/Rpl11/Rpl36/Rpl13/Mr…
REACTOME_RHO_GTPASES_ACTIVATE_NADPH_OXIDASES	REACTOME_RHO_GTPASES_ACTIVATE_NADPH_OXIDASES	22	-0.659088	-1.81124	0.00209744	0.054114	0.0480571	2181	tags=41%	list=12%	signal=36%	Ncf2/Ncf4/Ncf1/Rac2/Noxo1/Cybb/Mapk11/Prkcb/Cyba
REACTOME_GENERATION_OF_SECOND_MESSENGER_MOLECULES	REACTOME_GENERATION_OF_SECOND_MESSENGER_MOLECULES	22	-0.668238	-1.83639	0.00132539	0.0379945	0.0337419	3845	tags=64%	list=22%	signal=50%	Lcp2/Pak3/Cd101/Cd4/Zap70/Cd3e/Lck/Grap2/Lat/Itk/Cd247/H2-Eb2/Cd3g/Cd3d
REACTOME_EUKARYOTIC_TRANSLATION_INITIATION	REACTOME_EUKARYOTIC_TRANSLATION_INITIATION	116	-0.514128	-1.87453	8.1528e-06	0.000589901	0.000523875	7243	tags=81%	list=41%	signal=48%	Eif5/Rps25/Pabpc1/Rpl15/Eif3b/Rpl6/Eif3f/Eif3d/Eif4a2/Eif3h/Uba52/Rpl4/Rpl10/Eif3e/Rps2/Rpl23a/Eif3m/Rpl18/Eif2s3x/Rpl3/Rpl7a/Rps27l/Rpl7/Rpl28/Eif3g/Rplp0/Eif2b3/Rps7/Rpl11/Rpl36/Rpl13/Rpl32/Eif2b2/Rpl17/Eif3k/Rps17/Rpl24/Rps8/Fau/Rpl30/Rpl5/Eif3i/Rps5/Rps11/Rpl22/Rpl26/Rpl19/Rpl9/Rps16/Rpl36al/Rpl8/Rpl36a/Rps4x/Rpl23/Rps3/Rps6/Rpl38/Rpl12/Rps18/Rps15/Rpl13a/Rpl27a/Rpl14/Rpl21/Rpsa/Rpl35/Rps26/R…
REACTOME_NONSENSE_MEDIATED_DECAY_NMD	REACTOME_NONSENSE_MEDIATED_DECAY_NMD	110	-0.521112	-1.88989	3.34161e-06	0.000369487	0.000328131	6097	tags=70%	list=34%	signal=46%	Rps2/Rpl23a/Eif4a3/Rpl18/Rpl3/Gspt2/Rpl7a/Rps27l/Rpl7/Rpl28/Rplp0/Rps7/Rpl11/Rpl36/Rpl13/Rpl32/Rpl17/Rps17/Rpl24/Rps8/Fau/Rpl30/Rpl5/Rps5/Rps11/Rpl22/Rpl26/Rpl19/Rpl9/Rbm8a/Rps16/Rpl36al/Rpl8/Rpl36a/Rps4x/Rpl23/Rps3/Rps6/Rpl38/Rpl12/Rps18/Rps15/Rpl13a/Rpl27a/Magoh/Rpl14/Rpl21/Rpsa/Rpl35/Rps26/Rpl34/Rpl18a/Rpl37/Rpl35a/Rps24/Rpl39/Rplp2/Rpl27/Rps20/Rps9/Rps3a1/Rps19/Rpl22l1/Rps23/Rps12/Rps28/Rps10…
REACTOME_CHEMOKINE_RECEPTORS_BIND_CHEMOKINES	REACTOME_CHEMOKINE_RECEPTORS_BIND_CHEMOKINES	49	-0.591486	-1.90127	6.86831e-05	0.00332255	0.00295066	2390	tags=49%	list=13%	signal=42%	Ccl21a/Ccr3/Cx3cr1/Ccl5/Cxcr2/Cxcl12/Ccl20/Cxcl9/Ccl19/Cxcl10/Cxcr4/Cxcl16/Cxcr5/Ccr10/Cxcl5/Ccr7/Cxcl13/Ccr6/Cxcr6/Ccl1/Xcl1/Cxcl1/Ccl4/Ccr4
REACTOME_MAJOR_PATHWAY_OF_RRNA_PROCESSING_IN_THE_NUCLEOLUS_AND_CYTOSOL	REACTOME_MAJOR_PATHWAY_OF_RRNA_PROCESSING_IN_THE_NUCLEOLUS_AND_CYTOSOL	175	-0.511665	-1.96067	2.54396e-08	6.56342e-06	5.82879e-06	6097	tags=68%	list=34%	signal=45%	Rps2/Exosc3/Rpl23a/Exosc1/Pdcd11/Rpl18/Tex10/Rpl3/Las1l/Snu13/Rpl7a/Rps27l/Rpl7/Rpl28/Pelp1/Tsr1/Ddx52/Rplp0/Utp14a/Rps7/Rpl11/Wdr12/Rpl36/Rpl13/Emg1/Rpl32/Utp20/Wdr18/Rpl17/Utp6/Imp4/Gnl3/Nol11/Rps17/Rpl24/Rps8/Fau/Exosc7/Rpl30/Rpl5/Rps5/Nol6/Rps11/Wdr43/Rpl22/Rpl26/Imp3/Rpl19/Rpl9/Exosc8/Noc4l/Utp3/Rps16/Rpl36al/Rpl8/Ncl/Exosc4/Rpl36a/Rps4x/Rpl23/Rps3/Rps6/Ftsj3/Rpl38/Rpl12/Rps18/Rps15/Rpl13a/R…
REACTOME_NONSENSE_MEDIATED_DECAY_NMD_INDEPENDENT_OF_THE_EXON_JUNCTION_COMPLEX_EJC	REACTOME_NONSENSE_MEDIATED_DECAY_NMD_INDEPENDENT_OF_THE_EXON_JUNCTION_COMPLEX_EJC	91	-0.563064	-1.98898	4.84698e-07	7.09513e-05	6.301e-05	6097	tags=81%	list=34%	signal=54%	Rps2/Rpl23a/Rpl18/Rpl3/Gspt2/Rpl7a/Rps27l/Rpl7/Rpl28/Rplp0/Rps7/Rpl11/Rpl36/Rpl13/Rpl32/Rpl17/Rps17/Rpl24/Rps8/Fau/Rpl30/Rpl5/Rps5/Rps11/Rpl22/Rpl26/Rpl19/Rpl9/Rps16/Rpl36al/Rpl8/Rpl36a/Rps4x/Rpl23/Rps3/Rps6/Rpl38/Rpl12/Rps18/Rps15/Rpl13a/Rpl27a/Rpl14/Rpl21/Rpsa/Rpl35/Rps26/Rpl34/Rpl18a/Rpl37/Rpl35a/Rps24/Rpl39/Rplp2/Rpl27/Rps20/Rps9/Rps3a1/Rps19/Rpl22l1/Rps23/Rps12/Rps28/Rps10/Rpl3l/Rps14/Rps13/…
