# Supplementary material for: RORγt+ APCs require a distinct cis-regulatory element to instruct tolerance to dietary antigens
Source: Research Square preprint supplement (doi:10.21203/rs.3.rs-4865841/v1), 2025-08-01
Supplement: Supplementary file 4 [file 8228ade87b9a8e3ea9acc247.xlsx]

## Sheet: Table 8. primer list
	Primer Name	Sequence 5' to 3'	note
CRISPR-Cas9
	ROR225-gDNA-2F	TAATACGACTCACTATAGGGGGTAGGGAAGTCAGCATGAGGTTTTAGAGCTAGAAATAGC
	ROR369-gDNA-1F	TAATACGACTCACTATAGGGGTGGAGAGGCAGAGCACTACGTTTTAGAGCTAGAAATAGC
	ROR251-T7gDNA-1F	TAATACGACTCACTATAGGGCCAAACTCCCAGTTCTTGACGTTTTAGAGCTAGAAATAGC
	ROR251-T7gDNA-R	AGCACCGACTCGGTGCCACTT
Genome typing
	225 KO seq2-F	AGGCTCCTGACCTTTGATTG
	225 KO seq2-R	TACACTGACCGCATGGATGA
	369 KO seq2-F	CCCACGATTTCAGTTGTCTCTC
	369 KO seq2-R	CACACACTTCCAGTCACTCTC
RT-qPCR
	q- CBFB-F	GACCCTAGTCCTGGTTCTAACT
	q- CBFB-R	GAAGCAGTGTGTGTAGAGATGG
	q- RUNX1-F	CTCTGACCATCACCGTCTTTAC
	q- RUNX1-R	CATCTAGTTTCTGCCGATGTCT
	q- RUNX2-F	ACTCTTCTGGAGCCGTTTATG
	q- RUNX2-R	GTGAATCTGGCCATGTTTGTG
	q- RUNX3-F	GCCCGAGACTACAAGAAGAAA
	q- RUNX3-R	CCACATCCTCTGCTCAAACT
	Q-RORgt F	CCGCTGAGAGGGCTTCAC
	Q-RORgt R	TGCAGGAGTAGGCCACATTACA
	Q-β-Actin F	AAGTGTGACGTTGACATCCG
	Q-β-Actin R	GATCCACATCTGCTGGAAGG
	q-mCol1a1-F	AGACCTGTGTGTTCCCTACT
	q-mCol1a1-R	GAATCCATCGGTCATGCTCTC
	q-mCol4a1-F	CTGGCACAAAAGGGACGAG
	q-mCol4a1-R	ACGTGGCCGAGAATTTCACC
	q-mCol18a1-F	GTGCCCATCGTCAACCTGAA
	q-mCol18a1-R	GACATCTCTGCCGTCAAAAGAA
	q-mPostn-F	CCTGCCCTTATATGCTCTGCT
	q-mPostn-R	AAACATGGTCAATAGGCATCACT
	q-mCdh11-F	CTGGGTCTGGAACCAATTCTTT
	q-mCdh11-R	GCCTGAGCCATCAGTGTGTA
	q-mIL-1b-F	CAACCAACAAGTGATATTCTCCATG
	q-mIL-1b-R	GATCCACACTCTCCAGCTGCA
	q-mIL-4-F	TGAACGAGGTCACAGGAGAA
	q-mIL-4-R	CCTTGGAAGCCCTACAGACG
	q-mIL-5-F	CCCACGGACAGTTTGATTCT
	q-mIL-5-R	GCAATGAGACGATGAGGCTT
	q-mIL-6-F	TAGTCCTTCCTACCCCAATTTCC
	q-mIL-6-R	TTGGTCCTTAGCCACTCCTTC
	q-mIL-13-F	GCTGAGCAACATCACACAAG
	q-mIL-13-R	AATCCAGGGCTACACAGAAC
CUT&TAG
	CP-spike1-F	GTTACGTCTGCATGTGCTATCT
	CP-spike1-R	GAGTCACAGGAGAATGGAATGG
	CP-spike3-F	CCTTACTGGAATCGATGGTGTC
	CP-spike3-R	GGTGATACTTCGTCGCTGTC
	CP-RORgt p-F	ACAAGACACCACCCAAGACA
	CP-RORgt p-R	CATCAGGGGTAGGGATGTTC
	CP-Il4 p F	GAGTTAAAGTTGCTGAAACCAAGG
	CP-Il4 p R	ATTTTCCAATTGGTCTGATTTCAC
	CP-RORgt p2-F	GGGGAGAGCTTTGTGCAGAT
	CP-RORgt p2-R	AGTAGGGTAGCCCAGGACAG
	CP-OCR369-1 F	TGGAGAAGGGAAGAGGTAGG
	CP-OCR369-1 R	AAAGCAAGTGGTAGGGAGATTAG
	CP-OCR369-2 F	CCAGCAATGGGTCAGGTATG
	CP-OCR369-2 R	TACCTCTTCCCTTCTCCAAGAG
DNA pull-down
	Biotin-OCR369-F	GGTCATATCTCCTATGAGAT	5' Biotin
	Biotin-OCR369-R	CTGGCAGTAACACTTGGGT	5' Biotin
	Biotin-RORgtP-F	TATGGCTGTTGACAGTCCACA	5' Biotin
	Biotin-RORgtP-R	CACTTACTTCTCATGACTGAG	5' Biotin
3C-qPCR (Taqman)
	3C-RP probe-2	CTTGGCTCCCTGTCCTCCTCAGTAGG	5'-FAM 3'-TAMRA
	3C-TSC2-F2	TGTGTGCTGTCCTGGGCTAC
	3C-TSC2-R	CCTAGGAATGGTGACAGGACC
	3C-NCS	GTCTCAAAA TAACACCCCAC
	GAPDH_F_3C	TACCTGATGAACCTAAGC
	GAPDH_R_3C	GTGAAAGGGGCAGTGTCT
	3C-TS OCR369-1-F	TACACTGTGGTAAGGTTCCT
	3C-TS OCR369-1-R	TTCTCCAAGAGCCACATCC
	3C-TS OCR369-2-F	GCTTTATCTCAGACAGTAATACC
	3C-TS OCR369-2-R	TGACGGTGAAAGCAACATT
	3C-TSNC2-F	TCATACCCAATGCACCTCTG
	3C-TSNC2-R	CTTAGATCTGCACAAAGCTCTC
Dual-Luciferase assay
	GLprimer2	CTTTATGTTTTTGGCGTCTTCCA
	RVprimer3	CTAGCAAAATAGGCTGTCCC
	GLPrimer1	GGGAGGTGTGGGAGGTT
	GLPrimer 5	GCCGCTTCGAGCAGACATGA
	RVprimer4	GACGATAGTCATGCCCCGCG
	OCR369-BamH1-F	CGCGGATCCGGTCATATCTCCTATGAGAT
	OCR369-BamH1-R	CGCGGATCCTGGCAGTAACACTTGGGT
	Re HindIII RORgtP-R	CAGTACCGGAATGCCAAGCTTCACTTACTTCTCATGACTGAG
	Mlu1-RORgtP-F	AGGTACCGAGCTCTTACGCGTTATGGCTGTTGACAGTCCA
	Xba1-Runx3A-F	GACTCTAGACTCTGCACATAGTGCTGTTG
	Xho1-RUNX3A-R	AGCCTCGAGTTGTGGCTGGACAGAGCTCT
	M13-F	GTAAAACGACGGCCAGT
	M13-R	CAGGAAACAGCTATGAC
	uni-seq-F	AGCCCTTTGTACACCCTAAG
	uni-seq-R	TAGGAATGCTCGTCAAGAAG
	phRL-F	GACTTGAGCGTCGATTTTTGT
	phRL-R	AAGTTCGAGACTGTTGTGTC
	MCS-F	AAGCAGAGCTCGTTTAGTGAACC
	MCS-R	ATCCAGAGGTTGATTGTCGAG
