# Supplementary material for: RORγt+ APCs require a distinct cis-regulatory element to instruct tolerance to dietary antigens
Source: Research Square preprint supplement (doi:10.21203/rs.3.rs-4865841/v1), 2025-08-01
Supplement: Supplementary file 5 [file d1edbc2e2b0a84aab4af794d.xlsx]

## Sheet: Table 7A. 28-week-old ILC DEG
	p_val	avg_log2FC	pct.1	pct.2	p_val_adj	cluster	gene
Hs3st1	0	7.01973	0.832	0.026	0	ILC2	Hs3st1
Il17rb	0	6.56854	0.751	0.016	0	ILC2	Il17rb
Calca	0	5.55927	0.649	0.037	0	ILC2	Calca
Klrg1	0	4.74657	0.619	0.034	0	ILC2	Klrg1
Gata3	0	3.78875	0.65	0.084	0	ILC2	Gata3
Tspan13	0	2.60683	0.874	0.308	0	ILC2	Tspan13
Ly6a	0	4.25267	0.608	0.043	0	ILC2	Ly6a
Bzw2	0	3.00257	0.626	0.114	0	ILC2	Bzw2
Hes1	0	3.65059	0.597	0.108	0	ILC2	Hes1
Ptpn13	0	4.46422	0.504	0.035	0	ILC2	Ptpn13
Itk	0	2.03092	0.734	0.291	0	ILC2	Itk
Il4	0	6.04573	0.45	0.01	0	ILC2	Il4
Spcs3	0	2.58537	0.565	0.132	0	ILC2	Spcs3
Serp1	0	1.94631	0.83	0.404	0	ILC2	Serp1
Epas1	0	2.08253	0.652	0.227	0	ILC2	Epas1
Inpp4b	0	3.27434	0.477	0.061	0	ILC2	Inpp4b
Nr3c1	0	1.66459	0.802	0.394	0	ILC2	Nr3c1
Areg	0	2.6501	0.502	0.108	0	ILC2	Areg
Deptor	0	4.51014	0.391	0.022	0	ILC2	Deptor
Lmo4	0	1.92145	0.942	0.584	0	ILC2	Lmo4
Gcnt1	0	3.22431	0.413	0.061	0	ILC2	Gcnt1
Paxbp1	0	2.48226	0.464	0.113	0	ILC2	Paxbp1
Ets2	0	3.22564	0.401	0.052	0	ILC2	Ets2
Otulinl	0	2.3555	0.444	0.112	0	ILC2	Otulinl
Fyb	0	1.5495	0.549	0.218	0	ILC2	Fyb
Tnfrsf18	0	1.53288	0.665	0.334	0	ILC2	Tnfrsf18
Enpp4	0	2.55692	0.427	0.097	0	ILC2	Enpp4
Rnf128	0	3.1512	0.394	0.073	0	ILC2	Rnf128
Abhd17c	0	2.67237	0.401	0.081	0	ILC2	Abhd17c
Ipmk	0	3.56007	0.359	0.043	0	ILC2	Ipmk
Elf1	0	1.58901	0.754	0.439	0	ILC2	Elf1
Socs2	0	2.36774	0.453	0.141	0	ILC2	Socs2
Selenot	0	1.3674	0.645	0.337	0	ILC2	Selenot
Aff4	0	1.36279	0.604	0.305	0	ILC2	Aff4
Taldo1	0	1.26562	0.625	0.331	0	ILC2	Taldo1
Slc7a8	0	6.28495	0.276	0.004	0	ILC2	Slc7a8
Hba-a1	0	6.99457	0.274	0.003	0	ILC2	Hba-a1
Rpl35	0	1.10151	0.824	0.553	0	ILC2	Rpl35
Slain1	0	2.49467	0.354	0.084	0	ILC2	Slain1
Rpl36a	0	1.29094	0.935	0.682	0	ILC2	Rpl36a
Ret	0	2.42296	0.317	0.065	0	ILC2	Ret
Nfkb1	0	1.21579	0.777	0.526	0	ILC2	Nfkb1
Rab4a	0	2.80247	0.296	0.048	0	ILC2	Rab4a
Samsn1	0	1.02306	0.934	0.695	0	ILC2	Samsn1
Gas5	0	0.925124	0.828	0.589	0	ILC2	Gas5
Il9r	0	6.06657	0.24	0.004	0	ILC2	Il9r
Neb	0	4.98718	0.245	0.01	0	ILC2	Neb
Cysltr1	0	2.43412	0.279	0.056	0	ILC2	Cysltr1
Eef1b2	0	0.881407	0.837	0.616	0	ILC2	Eef1b2
Nrip1	0	0.954361	0.9	0.679	0	ILC2	Nrip1
Cybb	0	4.16372	0.233	0.015	0	ILC2	Cybb
Cd27	0	4.03037	0.232	0.017	0	ILC2	Cd27
Dnaja1	0	1.38141	0.888	0.688	0	ILC2	Dnaja1
Rgs2	0	1.62856	0.968	0.774	0	ILC2	Rgs2
Cd200r1	0	2.3303	0.25	0.057	0	ILC2	Cd200r1
Atp8a2	0	3.51301	0.212	0.02	0	ILC2	Atp8a2
Rps17	0	0.940515	0.927	0.736	0	ILC2	Rps17
Pdlim1	0	4.07512	0.197	0.014	0	ILC2	Pdlim1
Adora2a	0	2.65993	0.214	0.035	0	ILC2	Adora2a
Il5	0	7.51246	0.174	0.002	0	ILC2	Il5
Rpl28	0	0.831573	0.907	0.737	0	ILC2	Rpl28
Chdh	0	5.32371	0.171	0.005	0	ILC2	Chdh
Mras	0	4.66158	0.173	0.008	0	ILC2	Mras
Ccl1	0	6.41795	0.165	0.006	0	ILC2	Ccl1
Rps28	0	0.789286	0.925	0.768	0	ILC2	Rps28
Ar	0	2.78435	0.184	0.027	0	ILC2	Ar
Serinc3	0	1.05503	0.98	0.835	0	ILC2	Serinc3
H2-Oa	0	3.09345	0.163	0.019	0	ILC2	H2-Oa
Ptgir	0	7.12904	0.144	0.001	0	ILC2	Ptgir
Rpl36	0	0.775787	0.945	0.802	0	ILC2	Rpl36
Lgmn	0	4.95726	0.146	0.007	0	ILC2	Lgmn
Lpcat2	0	4.56571	0.145	0.007	0	ILC2	Lpcat2
Npm1	0	0.769547	0.936	0.8	0	ILC2	Npm1
Rpl31	0	0.795551	0.943	0.808	0	ILC2	Rpl31
Nsg2	0	5.29592	0.137	0.004	0	ILC2	Nsg2
Rpl10a	0	0.869282	0.968	0.836	0	ILC2	Rpl10a
Acbd7	0	3.78216	0.142	0.012	0	ILC2	Acbd7
Rpl12	0	1.066	0.981	0.854	0	ILC2	Rpl12
Il1rl1	0	4.76346	0.133	0.007	0	ILC2	Il1rl1
4932438H23Rik	0	3.98815	0.132	0.008	0	ILC2	4932438H23Rik
Rack1	0	0.727328	0.949	0.828	0	ILC2	Rack1
Il13	0	6.82801	0.124	0.003	0	ILC2	Il13
Rps10	0	0.820045	0.968	0.847	0	ILC2	Rps10
Klf5	0	7.10566	0.114	0.001	0	ILC2	Klf5
Ccr4	0	5.66805	0.114	0.002	0	ILC2	Ccr4
Rpl3	0	0.729981	0.955	0.848	0	ILC2	Rpl3
Rps26	0	1.07398	0.985	0.882	0	ILC2	Rps26
Homer2	0	7.3318	0.095	0.001	0	ILC2	Homer2
Rpl7a	0	0.634065	0.973	0.886	0	ILC2	Rpl7a
Rpl39	0	0.879576	0.988	0.901	0	ILC2	Rpl39
Rps8	0	0.925141	0.985	0.899	0	ILC2	Rps8
Rpl35a	0	0.644283	0.976	0.893	0	ILC2	Rpl35a
Rpl8	0	0.72474	0.976	0.895	0	ILC2	Rpl8
Rpsa	0	1.03121	0.991	0.914	0	ILC2	Rpsa
Rps20	0	1.16322	0.996	0.921	0	ILC2	Rps20
Rps19	0	1.00564	0.991	0.916	0	ILC2	Rps19
Rps13	0	0.815654	0.986	0.912	0	ILC2	Rps13
Rpl4	0	0.608206	0.973	0.899	0	ILC2	Rpl4
Rpl37	0	0.670472	0.968	0.896	0	ILC2	Rpl37
Rpl26	0	0.736624	0.983	0.916	0	ILC2	Rpl26
Sub1	0	0.943588	0.978	0.913	0	ILC2	Sub1
Rpl15	0	0.808135	0.987	0.924	0	ILC2	Rpl15
Rps15	0	0.748144	0.99	0.928	0	ILC2	Rps15
Rpl6	0	0.709223	0.993	0.936	0	ILC2	Rpl6
Rps12	0	0.892306	0.992	0.941	0	ILC2	Rps12
Rpl7	0	0.608065	0.985	0.934	0	ILC2	Rpl7
Rpl41	0	0.663969	0.989	0.943	0	ILC2	Rpl41
Rps21	0	0.61633	0.988	0.943	0	ILC2	Rps21
Rpl14	0	0.576441	0.988	0.947	0	ILC2	Rpl14
Rpl18	0	0.532416	0.987	0.949	0	ILC2	Rpl18
Rps5	0	0.747959	0.994	0.957	0	ILC2	Rps5
Rps6	0	1.03097	0.997	0.962	0	ILC2	Rps6
Rps11	0	0.801689	0.994	0.959	0	ILC2	Rps11
Rps4x	0	0.827258	0.995	0.962	0	ILC2	Rps4x
Rps18	0	0.954639	0.998	0.967	0	ILC2	Rps18
Rpl11	0	0.631472	0.995	0.969	0	ILC2	Rpl11
Rplp0	0	0.961506	0.998	0.972	0	ILC2	Rplp0
Rps29	0	0.542071	0.994	0.969	0	ILC2	Rps29
Rpl37a	0	0.923096	0.999	0.976	0	ILC2	Rpl37a
Rpl19	0	0.709038	0.997	0.974	0	ILC2	Rpl19
Rpl34	0	0.57998	0.997	0.975	0	ILC2	Rpl34
Rps2	0	0.823534	0.998	0.976	0	ILC2	Rps2
Rpl32	0	1.03825	0.999	0.978	0	ILC2	Rpl32
Rps27a	0	0.702652	0.997	0.976	0	ILC2	Rps27a
Rpl27	0	0.5687	0.995	0.974	0	ILC2	Rpl27
Rps7	0	0.962342	0.997	0.976	0	ILC2	Rps7
Rps3	0	0.722284	0.999	0.98	0	ILC2	Rps3
Rpl30	0	0.555897	0.997	0.981	0	ILC2	Rpl30
Rpl27a	0	0.631766	0.999	0.984	0	ILC2	Rpl27a
Rps3a1	0	0.751928	0.998	0.984	0	ILC2	Rps3a1
Rpl23a	0	0.665619	0.998	0.985	0	ILC2	Rpl23a
Rpl23	0	0.763292	1	0.987	0	ILC2	Rpl23
Rpl9	0	0.615641	0.999	0.987	0	ILC2	Rpl9
Rpl5	0	0.708015	0.999	0.987	0	ILC2	Rpl5
Rps15a	0	0.689262	0.998	0.988	0	ILC2	Rps15a
Rps9	0	0.937705	1	0.991	0	ILC2	Rps9
Rps16	0	0.701505	1	0.992	0	ILC2	Rps16
Rps27	0	0.581892	0.999	0.992	0	ILC2	Rps27
Rplp2	0	0.695132	1	0.995	0	ILC2	Rplp2
Rpl18a	0	0.755902	1	0.995	0	ILC2	Rpl18a
Rps14	0	0.608837	0.999	0.995	0	ILC2	Rps14
Rps24	0	0.803321	1	0.997	0	ILC2	Rps24
Rps23	0	0.649057	1	0.997	0	ILC2	Rps23
Rpl17	0	0.673478	1	0.997	0	ILC2	Rpl17
Rpl13	0	0.763368	1	0.999	0	ILC2	Rpl13
Rplp1	0	1.42513	1	0.999	0	ILC2	Rplp1
Tmsb4x	0	0.50443	1	1	0	ILC2	Tmsb4x
Eef1a1	0	0.402072	1	1	0	ILC2	Eef1a1
Fau	1.9607e-298	0.44753	0.998	0.989	3.00477e-294	ILC2	Fau
Pparg	1.4967e-296	6.12075	0.095	0.001	2.29369e-292	ILC2	Pparg
Adam19	5.08496e-293	3.27579	0.148	0.016	7.7927e-289	ILC2	Adam19
Glb1	3.8085e-292	2.28761	0.246	0.058	5.83653e-288	ILC2	Glb1
Akr1c12	2.77566e-291	6.06877	0.094	0.001	4.2537e-287	ILC2	Akr1c12
Jak2	5.7397e-288	1.45613	0.482	0.217	8.7961e-284	ILC2	Jak2
Gpx4	3.88257e-285	0.957605	0.81	0.579	5.95003e-281	ILC2	Gpx4
Eef1g	4.86958e-285	1.01378	0.716	0.466	7.46263e-281	ILC2	Eef1g
Nxpe4	5.66045e-281	5.67428	0.093	0.002	8.67464e-277	ILC2	Nxpe4
Gm48236	2.54776e-279	3.13662	0.148	0.018	3.90445e-275	ILC2	Gm48236
Slc25a3	6.21109e-278	0.737719	0.908	0.752	9.5185e-274	ILC2	Slc25a3
Tpt1	8.06144e-278	0.307958	1	1	1.23542e-273	ILC2	Tpt1
Rpl38	6.0822e-277	0.66304	0.929	0.803	9.32097e-273	ILC2	Rpl38
Prnp	1.90942e-276	3.16029	0.143	0.017	2.92619e-272	ILC2	Prnp
Klk8	7.26252e-276	2.37997	0.207	0.042	1.11298e-271	ILC2	Klk8
Dusp10	1.57323e-273	1.9499	0.356	0.132	2.41097e-269	ILC2	Dusp10
Gm20627	1.44547e-270	3.12703	0.145	0.018	2.21518e-266	ILC2	Gm20627
Tph1	4.4199e-270	6.53512	0.091	0.002	6.7735e-266	ILC2	Tph1
Klf2	4.96055e-268	1.41549	0.557	0.297	7.60204e-264	ILC2	Klf2
Specc1	1.01039e-267	4.51954	0.098	0.004	1.54843e-263	ILC2	Specc1
Gm13219	4.11228e-267	6.41808	0.085	0.001	6.30207e-263	ILC2	Gm13219
Ccr8	7.80957e-263	5.51893	0.089	0.002	1.19682e-258	ILC2	Ccr8
Pard3	5.62975e-262	2.78791	0.157	0.023	8.62759e-258	ILC2	Pard3
Ivns1abp	3.93084e-261	1.10889	0.644	0.393	6.02402e-257	ILC2	Ivns1abp
Rab27b	7.87662e-261	5.03578	0.095	0.004	1.20709e-256	ILC2	Rab27b
Zrsr1	7.52258e-258	1.93077	0.308	0.103	1.15284e-253	ILC2	Zrsr1
Rad51b	1.43886e-257	2.75084	0.161	0.025	2.20505e-253	ILC2	Rad51b
Irf2bp2	1.83776e-253	1.67306	0.346	0.127	2.81637e-249	ILC2	Irf2bp2
Plaur	2.32105e-253	3.3445	0.129	0.014	3.55701e-249	ILC2	Plaur
Kcnn4	7.25404e-253	3.86125	0.108	0.008	1.11168e-248	ILC2	Kcnn4
Dennd5a	9.29867e-244	1.74489	0.288	0.092	1.42502e-239	ILC2	Dennd5a
Gpr65	4.62793e-242	0.963792	0.689	0.443	7.0923e-238	ILC2	Gpr65
Bmp7	1.14907e-238	5.5638	0.079	0.002	1.76095e-234	ILC2	Bmp7
Eepd1	3.00694e-238	5.1178	0.084	0.003	4.60814e-234	ILC2	Eepd1
Hilpda	3.14625e-238	1.06003	0.822	0.644	4.82162e-234	ILC2	Hilpda
Ebi3	7.30236e-237	3.45647	0.113	0.011	1.11909e-232	ILC2	Ebi3
Rpl22	2.35841e-236	0.587125	0.942	0.834	3.61426e-232	ILC2	Rpl22
Gm2a	5.89689e-227	1.54983	0.359	0.146	9.03698e-223	ILC2	Gm2a
Ppp2r3a	1.83918e-224	4.28651	0.086	0.004	2.81854e-220	ILC2	Ppp2r3a
Stxbp6	2.38104e-224	5.64641	0.074	0.002	3.64894e-220	ILC2	Stxbp6
Npnt	1.16698e-223	2.45845	0.156	0.029	1.7884e-219	ILC2	Npnt
Lilr4b	8.36135e-223	1.14998	0.415	0.18	1.28138e-218	ILC2	Lilr4b
Klf6	3.6448e-222	0.891742	0.757	0.549	5.58566e-218	ILC2	Klf6
Rpl29	8.20293e-222	0.564565	0.932	0.833	1.2571e-217	ILC2	Rpl29
Cd81	2.56472e-221	1.55762	0.262	0.081	3.93043e-217	ILC2	Cd81
Gm973	2.01651e-220	6.7593	0.069	0.001	3.0903e-216	ILC2	Gm973
Dgat2	7.5288e-218	2.31798	0.164	0.033	1.15379e-213	ILC2	Dgat2
Pde1c	1.38599e-217	2.79039	0.133	0.02	2.12404e-213	ILC2	Pde1c
Rxrg	6.07972e-216	5.99273	0.069	0.001	9.31717e-212	ILC2	Rxrg
Art2b	1.02134e-212	3.07221	0.114	0.014	1.5652e-208	ILC2	Art2b
Spty2d1	6.31833e-210	1.33731	0.581	0.366	9.68285e-206	ILC2	Spty2d1
B2m	4.97933e-207	0.279105	1	1	7.63083e-203	ILC2	B2m
Kif23	7.01348e-206	3.57865	0.097	0.009	1.07482e-201	ILC2	Kif23
Pde4d	4.67075e-205	2.3749	0.155	0.031	7.15792e-201	ILC2	Pde4d
AW011738	9.10094e-205	2.07279	0.209	0.058	1.39472e-200	ILC2	AW011738
Creb3l1	3.02468e-204	3.98443	0.087	0.006	4.63533e-200	ILC2	Creb3l1
Pou2f2	1.71866e-203	3.2568	0.106	0.012	2.63384e-199	ILC2	Pou2f2
1700061F12Rik	1.98773e-202	6.03071	0.067	0.001	3.0462e-198	ILC2	1700061F12Rik
Ifngr2	5.87106e-201	1.79476	0.238	0.075	8.9974e-197	ILC2	Ifngr2
Uba52	2.60639e-200	0.56912	0.915	0.794	3.9943e-196	ILC2	Uba52
Rbfa	1.34789e-198	1.85427	0.242	0.078	2.06564e-194	ILC2	Rbfa
Faah	2.98546e-198	2.0387	0.194	0.051	4.57522e-194	ILC2	Faah
Samhd1	1.02021e-197	1.23818	0.441	0.223	1.56347e-193	ILC2	Samhd1
Map4k3	1.44824e-197	2.3661	0.153	0.031	2.21943e-193	ILC2	Map4k3
Hlf	6.52311e-196	2.02967	0.198	0.054	9.99667e-192	ILC2	Hlf
Ldha	8.87848e-196	1.01321	0.619	0.399	1.36063e-191	ILC2	Ldha
Rps25	1.38395e-195	0.536589	0.927	0.825	2.1209e-191	ILC2	Rps25
Nck2	1.1066e-194	3.37719	0.095	0.009	1.69586e-190	ILC2	Nck2
Elovl5	6.46328e-193	1.22027	0.491	0.271	9.90498e-189	ILC2	Elovl5
Nmur1	6.43574e-192	4.99377	0.068	0.002	9.86277e-188	ILC2	Nmur1
Rpl22l1	1.43701e-188	0.648095	0.849	0.69	2.20221e-184	ILC2	Rpl22l1
Tcrg-C4	8.66558e-188	1.2775	0.36	0.16	1.328e-183	ILC2	Tcrg-C4
Itm2c	1.11711e-186	0.897427	0.654	0.452	1.71197e-182	ILC2	Itm2c
Eef2	1.16726e-186	0.517275	0.932	0.824	1.78882e-182	ILC2	Eef2
Zdhhc23	3.01687e-186	3.17806	0.099	0.012	4.62335e-182	ILC2	Zdhhc23
Pdcd1lg2	1.8555e-184	1.74003	0.22	0.069	2.84355e-180	ILC2	Pdcd1lg2
Ptpn9	2.14862e-184	1.94887	0.192	0.054	3.29276e-180	ILC2	Ptpn9
Tent5a	2.67225e-184	1.40142	0.38	0.181	4.09522e-180	ILC2	Tent5a
Alox5	1.15861e-181	6.91885	0.057	0	1.77556e-177	ILC2	Alox5
Prkcb	3.1409e-181	1.89701	0.187	0.051	4.81342e-177	ILC2	Prkcb
Fbxl21	2.39075e-180	3.28408	0.091	0.01	3.66382e-176	ILC2	Fbxl21
1700113H08Rik	4.83379e-179	2.64612	0.12	0.021	7.40778e-175	ILC2	1700113H08Rik
Cyp51	3.10389e-178	1.40641	0.333	0.146	4.75672e-174	ILC2	Cyp51
Il6	9.8726e-178	4.52712	0.072	0.004	1.51298e-173	ILC2	Il6
Glrx	3.43014e-176	2.3373	0.142	0.03	5.25669e-172	ILC2	Glrx
Ifnar1	3.51846e-175	1.66359	0.236	0.082	5.39203e-171	ILC2	Ifnar1
Ugcg	4.55775e-175	1.45915	0.28	0.109	6.98476e-171	ILC2	Ugcg
Rpl24	1.53161e-174	0.541832	0.892	0.768	2.34719e-170	ILC2	Rpl24
Mvb12b	8.11348e-173	1.67205	0.23	0.078	1.24339e-168	ILC2	Mvb12b
Galc	3.44382e-169	2.34644	0.134	0.028	5.27765e-165	ILC2	Galc
Prxl2a	1.58512e-167	2.75152	0.109	0.018	2.4292e-163	ILC2	Prxl2a
Tanc2	3.93943e-165	2.9271	0.096	0.013	6.03717e-161	ILC2	Tanc2
Trbc1	5.84339e-165	0.690343	0.622	0.379	8.95499e-161	ILC2	Trbc1
Gm47599	4.48707e-164	4.5741	0.063	0.003	6.87643e-160	ILC2	Gm47599
Tbca	8.19461e-163	0.901001	0.549	0.337	1.25582e-158	ILC2	Tbca
Stk4	9.22152e-161	1.12352	0.407	0.212	1.4132e-156	ILC2	Stk4
Ubash3a	3.4216e-157	2.82112	0.092	0.013	5.24361e-153	ILC2	Ubash3a
Cnot6l	9.64662e-156	1.02971	0.435	0.237	1.47834e-151	ILC2	Cnot6l
Ptpn18	4.71798e-154	0.865699	0.54	0.332	7.23031e-150	ILC2	Ptpn18
Rpl21	8.63628e-154	0.36192	0.983	0.957	1.32351e-149	ILC2	Rpl21
Gm20186	5.95312e-152	1.11555	0.612	0.439	9.12315e-148	ILC2	Gm20186
Akr1c13	6.49905e-151	2.89711	0.09	0.013	9.95979e-147	ILC2	Akr1c13
Ctla2a	2.02867e-150	3.61817	0.084	0.011	3.10894e-146	ILC2	Ctla2a
Sp110	6.60811e-149	1.14772	0.363	0.182	1.01269e-144	ILC2	Sp110
Igsf5	7.79195e-145	1.74311	0.175	0.054	1.19412e-140	ILC2	Igsf5
Isg15	1.03348e-144	1.17186	0.348	0.171	1.58381e-140	ILC2	Isg15
Pdcd1	4.06977e-143	1.85434	0.151	0.042	6.23692e-139	ILC2	Pdcd1
Chd7	2.02673e-141	1.21218	0.316	0.148	3.10597e-137	ILC2	Chd7
Gbp2	2.24522e-141	1.64703	0.22	0.083	3.4408e-137	ILC2	Gbp2
4930523C07Rik	8.9775e-138	0.910755	0.533	0.344	1.3758e-133	ILC2	4930523C07Rik
Rpl13a	6.72076e-137	0.686286	0.655	0.465	1.02996e-132	ILC2	Rpl13a
Arl5a	1.39472e-136	1.64032	0.205	0.076	2.13741e-132	ILC2	Arl5a
Pnn	2.66369e-136	1.03795	0.388	0.209	4.0821e-132	ILC2	Pnn
Gbp7	1.31767e-135	1.29318	0.263	0.113	2.01933e-131	ILC2	Gbp7
Selenow	5.52285e-135	0.81324	0.546	0.352	8.46377e-131	ILC2	Selenow
Rpl10	1.60916e-134	0.3323	0.989	0.964	2.46603e-130	ILC2	Rpl10
Mboat1	1.97592e-133	4.08688	0.053	0.003	3.02809e-129	ILC2	Mboat1
Churc1	6.61713e-132	1.22316	0.27	0.119	1.01407e-127	ILC2	Churc1
Prc1	2.94438e-131	2.18782	0.133	0.036	4.51226e-127	ILC2	Prc1
Lsm8	1.04228e-130	1.01911	0.433	0.254	1.59729e-126	ILC2	Lsm8
Scel	2.36437e-130	7.06814	0.04	0	3.6234e-126	ILC2	Scel
Lgals9	4.62362e-130	1.14153	0.318	0.156	7.08569e-126	ILC2	Lgals9
Tnfrsf10b	9.53549e-130	2.3596	0.101	0.021	1.46131e-125	ILC2	Tnfrsf10b
Pcsk1	3.19408e-129	5.74996	0.043	0.001	4.89493e-125	ILC2	Pcsk1
H2-K1	3.4491e-129	0.258686	1	0.997	5.28574e-125	ILC2	H2-K1
Suco	3.92108e-129	1.0652	0.405	0.231	6.00905e-125	ILC2	Suco
Hba-a2	1.56109e-125	6.17434	0.04	0.001	2.39237e-121	ILC2	Hba-a2
Prkcq	1.04512e-124	1.92688	0.124	0.032	1.60164e-120	ILC2	Prkcq
Spns3	3.66642e-124	3.92849	0.052	0.004	5.61879e-120	ILC2	Spns3
Tapbpl	4.09055e-124	1.30449	0.244	0.105	6.26877e-120	ILC2	Tapbpl
Itgb7	9.06396e-124	0.704046	0.609	0.422	1.38905e-119	ILC2	Itgb7
2510009E07Rik	1.36932e-123	3.26676	0.065	0.007	2.09849e-119	ILC2	2510009E07Rik
Lilrb4a	7.77763e-123	1.63819	0.168	0.057	1.19192e-118	ILC2	Lilrb4a
Basp1	9.51012e-122	1.15098	0.389	0.226	1.45743e-117	ILC2	Basp1
Skap1	6.16662e-121	0.788853	0.479	0.292	9.45034e-117	ILC2	Skap1
Mctp1	9.71832e-121	4.98833	0.043	0.001	1.48933e-116	ILC2	Mctp1
Ppm1l	1.14829e-119	3.02311	0.068	0.009	1.75976e-115	ILC2	Ppm1l
Cacna1d	1.17541e-119	3.72887	0.053	0.004	1.80131e-115	ILC2	Cacna1d
Heph	2.99024e-118	1.03297	0.353	0.191	4.58255e-114	ILC2	Heph
Tmem64	6.273e-118	0.706202	0.57	0.382	9.61338e-114	ILC2	Tmem64
Tkt	1.03845e-117	1.14399	0.287	0.139	1.59143e-113	ILC2	Tkt
Lgals7	1.0918e-117	3.98953	0.049	0.003	1.67318e-113	ILC2	Lgals7
Grin2d	1.73417e-116	4.04493	0.048	0.003	2.65762e-112	ILC2	Grin2d
Apaf1	7.34165e-116	1.58852	0.173	0.062	1.12511e-111	ILC2	Apaf1
Eif3f	9.13923e-115	0.593073	0.681	0.513	1.40059e-110	ILC2	Eif3f
Arhgef10l	7.64941e-114	5.30495	0.039	0.001	1.17227e-109	ILC2	Arhgef10l
Tgm2	8.80667e-114	1.37987	0.216	0.091	1.34962e-109	ILC2	Tgm2
Gm10076	1.19839e-113	1.04737	0.332	0.177	1.83654e-109	ILC2	Gm10076
Arhgef12	2.7451e-113	2.57024	0.075	0.012	4.20687e-109	ILC2	Arhgef12
Ero1l	3.18866e-113	1.17238	0.365	0.208	4.88662e-109	ILC2	Ero1l
Eif3e	1.50508e-112	0.675779	0.583	0.406	2.30654e-108	ILC2	Eif3e
Ifitm2	6.2538e-112	1.78837	0.124	0.035	9.58395e-108	ILC2	Ifitm2
Soat1	1.01155e-111	1.83951	0.133	0.04	1.55021e-107	ILC2	Soat1
Acer2	1.10556e-110	4.29787	0.043	0.002	1.69428e-106	ILC2	Acer2
Cnih1	1.66088e-110	1.45902	0.181	0.069	2.5453e-106	ILC2	Cnih1
Swap70	3.87266e-109	1.5709	0.162	0.058	5.93486e-105	ILC2	Swap70
Csf2	6.07027e-109	1.71091	0.492	0.365	9.30269e-105	ILC2	Csf2
Cox7a2l	1.51502e-108	0.615332	0.618	0.443	2.32176e-104	ILC2	Cox7a2l
Galnt3	3.32809e-107	7.09051	0.033	0	5.1003e-103	ILC2	Galnt3
Nop53	6.16572e-107	0.553123	0.703	0.537	9.44896e-103	ILC2	Nop53
Gla	4.36173e-106	1.83155	0.15	0.052	6.68435e-102	ILC2	Gla
Rasgrp4	5.49968e-106	2.15803	0.093	0.021	8.42826e-102	ILC2	Rasgrp4
Tnfaip8	4.20879e-105	0.677096	0.597	0.428	6.44997e-101	ILC2	Tnfaip8
Gm40271	4.8791e-105	0.773778	0.472	0.303	7.47722e-101	ILC2	Gm40271
Ppfibp2	1.62133e-104	1.80747	0.117	0.033	2.48469e-100	ILC2	Ppfibp2
Cpq	2.14627e-104	1.75659	0.121	0.036	3.28916e-100	ILC2	Cpq
Arhgef6	5.08776e-104	1.33671	0.233	0.108	7.79699e-100	ILC2	Arhgef6
Tubb5	1.6412e-103	0.905462	0.358	0.202	2.51514e-99	ILC2	Tubb5
Rapgef2	2.3811e-103	1.46864	0.167	0.063	3.64903e-99	ILC2	Rapgef2
Emp3	2.55143e-103	1.30125	0.196	0.081	3.91007e-99	ILC2	Emp3
Khdc1a	6.6401e-103	5.6944	0.034	0.001	1.0176e-98	ILC2	Khdc1a
I730030J21Rik	2.53374e-102	3.14906	0.055	0.007	3.88296e-98	ILC2	I730030J21Rik
Catsperd	1.10609e-101	3.57883	0.046	0.004	1.69508e-97	ILC2	Catsperd
Zc3h12c	3.59703e-101	3.06511	0.056	0.007	5.51245e-97	ILC2	Zc3h12c
St6galnac5	1.33042e-100	4.91473	0.035	0.001	2.03887e-96	ILC2	St6galnac5
Gm47601	1.34555e-99	4.23297	0.039	0.002	2.06206e-95	ILC2	Gm47601
9230102O04Rik	1.6968e-99	6.94466	0.031	0	2.60034e-95	ILC2	9230102O04Rik
Itga4	3.57136e-98	1.09607	0.304	0.165	5.47311e-94	ILC2	Itga4
Angpt1	1.42701e-97	3.87257	0.041	0.003	2.18689e-93	ILC2	Angpt1
Sytl2	1.77006e-97	2.45352	0.068	0.012	2.71261e-93	ILC2	Sytl2
Naip5	3.33003e-97	2.40289	0.073	0.014	5.10326e-93	ILC2	Naip5
Blvrb	2.98283e-96	2.10414	0.085	0.02	4.57118e-92	ILC2	Blvrb
Naca	2.01978e-95	0.415677	0.843	0.721	3.09532e-91	ILC2	Naca
Aplp2	5.58025e-95	0.664668	0.586	0.429	8.55173e-91	ILC2	Aplp2
mt-Co1	5.84427e-95	0.197053	0.999	1	8.95634e-91	ILC2	mt-Co1
Mat2a	2.77288e-94	0.711577	0.555	0.404	4.24944e-90	ILC2	Mat2a
Kcnq5	3.08096e-93	1.63066	0.129	0.043	4.72157e-89	ILC2	Kcnq5
Plac8	5.51476e-93	0.913486	0.225	0.106	8.45137e-89	ILC2	Plac8
Bcl11b	5.66719e-92	1.34259	0.162	0.064	8.68498e-88	ILC2	Bcl11b
Hspe1	6.34479e-92	0.697983	0.469	0.31	9.72339e-88	ILC2	Hspe1
Tmem273	1.7431e-91	1.0851	0.256	0.13	2.6713e-87	ILC2	Tmem273
A630001O12Rik	4.00054e-91	3.93137	0.038	0.003	6.13083e-87	ILC2	A630001O12Rik
Nrros	2.86445e-90	1.72127	0.116	0.037	4.38978e-86	ILC2	Nrros
Arid5b	5.04072e-90	1.22125	0.224	0.108	7.7249e-86	ILC2	Arid5b
Ell2	8.0151e-90	0.726313	0.512	0.361	1.22831e-85	ILC2	Ell2
Zfas1	1.06128e-89	0.895428	0.33	0.19	1.62641e-85	ILC2	Zfas1
Atp5g2	1.10009e-89	0.572181	0.59	0.427	1.68589e-85	ILC2	Atp5g2
Cfap53	1.67882e-89	3.05584	0.049	0.006	2.57279e-85	ILC2	Cfap53
Atp8a1	2.56675e-89	1.39742	0.163	0.066	3.93355e-85	ILC2	Atp8a1
Ppp1r14b	2.95578e-89	1.26773	0.191	0.084	4.52974e-85	ILC2	Ppp1r14b
Hist1h2bc	3.53362e-89	2.55161	0.062	0.011	5.41527e-85	ILC2	Hist1h2bc
Pabpc1	4.0009e-88	0.299409	0.956	0.885	6.13138e-84	ILC2	Pabpc1
Nckap5	4.12984e-88	3.53958	0.04	0.003	6.32898e-84	ILC2	Nckap5
Noxa1	1.01346e-87	4.97503	0.031	0.001	1.55312e-83	ILC2	Noxa1
2410006H16Rik	1.05742e-87	0.612631	0.582	0.424	1.62049e-83	ILC2	2410006H16Rik
Bcap31	5.11513e-87	0.766194	0.437	0.288	7.83894e-83	ILC2	Bcap31
Itgb3	8.38485e-87	0.839138	0.369	0.226	1.28498e-82	ILC2	Itgb3
Eef1d	5.31504e-86	0.639457	0.506	0.349	8.1453e-82	ILC2	Eef1d
Aldh2	2.12116e-85	1.55377	0.118	0.039	3.25068e-81	ILC2	Aldh2
Ighm	2.16332e-85	0.887379	0.247	0.125	3.31529e-81	ILC2	Ighm
Nsa2	6.04883e-85	0.629321	0.486	0.327	9.26983e-81	ILC2	Nsa2
Trbc2	1.1199e-84	0.441541	0.696	0.518	1.71625e-80	ILC2	Trbc2
Mzt1	1.14069e-84	1.31449	0.168	0.071	1.74811e-80	ILC2	Mzt1
Siah2	8.56082e-84	1.05442	0.267	0.143	1.31195e-79	ILC2	Siah2
Epb41l4a	5.30694e-83	5.47496	0.028	0.001	8.13288e-79	ILC2	Epb41l4a
Aldoa	8.79827e-83	0.592618	0.558	0.406	1.34833e-78	ILC2	Aldoa
Ttc3	9.72069e-83	1.20594	0.185	0.083	1.4897e-78	ILC2	Ttc3
D430036J16Rik	7.1606e-82	5.95195	0.026	0	1.09736e-77	ILC2	D430036J16Rik
Tespa1	9.75248e-82	0.924945	0.298	0.169	1.49457e-77	ILC2	Tespa1
Frmd4b	4.74136e-80	0.983389	0.292	0.166	7.26613e-76	ILC2	Frmd4b
Ctsd	6.41326e-80	0.840709	0.326	0.192	9.82832e-76	ILC2	Ctsd
Prkcz	1.10566e-78	2.86799	0.046	0.006	1.69443e-74	ILC2	Prkcz
Cipc	2.78304e-78	1.57139	0.117	0.042	4.26501e-74	ILC2	Cipc
Cst7	3.28887e-77	1.19458	0.18	0.082	5.0402e-73	ILC2	Cst7
Mxi1	4.39838e-77	1.32751	0.156	0.066	6.74051e-73	ILC2	Mxi1
Tet2	1.14525e-76	1.25688	0.174	0.079	1.7551e-72	ILC2	Tet2
Mfge8	2.73209e-76	2.40301	0.058	0.011	4.18693e-72	ILC2	Mfge8
Dapp1	5.96028e-76	1.41432	0.134	0.053	9.13412e-72	ILC2	Dapp1
Stab2	6.73473e-76	1.66618	0.13	0.051	1.0321e-71	ILC2	Stab2
Map1lc3a	1.70368e-75	1.1159	0.205	0.101	2.61089e-71	ILC2	Map1lc3a
Cystm1	9.52411e-75	2.15485	0.073	0.018	1.45957e-70	ILC2	Cystm1
Trps1	3.98923e-74	1.51536	0.11	0.038	6.11349e-70	ILC2	Trps1
Plcl1	5.10269e-74	4.39007	0.028	0.001	7.81988e-70	ILC2	Plcl1
Larp1	3.24276e-73	0.958061	0.233	0.122	4.96953e-69	ILC2	Larp1
Lpar6	4.1967e-73	1.10772	0.236	0.127	6.43145e-69	ILC2	Lpar6
Ube2l6	1.69657e-72	2.34276	0.057	0.011	2.6e-68	ILC2	Ube2l6
Herc1	2.00713e-72	0.943625	0.246	0.134	3.07592e-68	ILC2	Herc1
Tcrg-C1	7.01459e-72	0.977528	0.357	0.233	1.07499e-67	ILC2	Tcrg-C1
Rad50	3.88652e-71	1.07443	0.193	0.095	5.95609e-67	ILC2	Rad50
Socs5	5.43956e-71	2.11974	0.063	0.015	8.33612e-67	ILC2	Socs5
Hspa4	5.51246e-71	0.708421	0.408	0.273	8.44784e-67	ILC2	Hspa4
Adam8	1.56713e-70	1.85817	0.075	0.021	2.40163e-66	ILC2	Adam8
B230307C23Rik	2.07606e-70	1.71352	0.093	0.03	3.18155e-66	ILC2	B230307C23Rik
Efcc1	4.88204e-70	5.19116	0.024	0.001	7.48173e-66	ILC2	Efcc1
Gm49980	6.10625e-70	1.22309	0.121	0.047	9.35783e-66	ILC2	Gm49980
Rab8b	6.17329e-70	0.63889	0.43	0.292	9.46056e-66	ILC2	Rab8b
Pde7a	1.54194e-69	0.932383	0.232	0.124	2.36302e-65	ILC2	Pde7a
Dnah12	3.81344e-68	3.61774	0.029	0.002	5.8441e-64	ILC2	Dnah12
Etv3	4.38425e-68	0.973435	0.252	0.143	6.71886e-64	ILC2	Etv3
Tbc1d4	4.69727e-67	2.86622	0.042	0.006	7.19857e-63	ILC2	Tbc1d4
Rexo2	5.7863e-67	0.769896	0.317	0.195	8.86751e-63	ILC2	Rexo2
Rab11fip5	6.22974e-67	4.76593	0.024	0.001	9.54707e-63	ILC2	Rab11fip5
Selenok	1.47969e-66	0.403115	0.761	0.649	2.26762e-62	ILC2	Selenok
Anks6	2.70195e-66	2.31412	0.054	0.012	4.14074e-62	ILC2	Anks6
Tspan32	5.50925e-66	1.01167	0.188	0.093	8.44293e-62	ILC2	Tspan32
Ppp1cc	1.59901e-65	0.455635	0.638	0.506	2.45048e-61	ILC2	Ppp1cc
Taf1d	1.9068e-65	0.75269	0.336	0.214	2.92217e-61	ILC2	Taf1d
Pglyrp2	2.37171e-65	1.25412	0.139	0.06	3.63465e-61	ILC2	Pglyrp2
Chn2	4.15808e-65	0.800908	0.262	0.15	6.37225e-61	ILC2	Chn2
Uck2	4.24598e-65	1.82545	0.074	0.021	6.50696e-61	ILC2	Uck2
Tomm20	1.87853e-64	0.515194	0.55	0.414	2.87885e-60	ILC2	Tomm20
Eif3k	2.23773e-64	0.502934	0.533	0.393	3.42932e-60	ILC2	Eif3k
Abhd14a	8.45227e-64	1.69584	0.082	0.026	1.29531e-59	ILC2	Abhd14a
Nav2	8.74874e-64	2.34681	0.048	0.009	1.34074e-59	ILC2	Nav2
Ahr	1.59422e-63	1.03241	0.186	0.094	2.44314e-59	ILC2	Ahr
Radx	3.74987e-63	3.5684	0.028	0.002	5.74667e-59	ILC2	Radx
Gm42031	5.74518e-63	0.887914	0.257	0.15	8.80448e-59	ILC2	Gm42031
Dyrk3	7.98536e-63	1.78925	0.073	0.021	1.22376e-58	ILC2	Dyrk3
Fbxo34	1.37559e-62	1.13511	0.166	0.08	2.10809e-58	ILC2	Fbxo34
P2ry14	7.58819e-62	2.54458	0.04	0.007	1.16289e-57	ILC2	P2ry14
Decr1	1.37241e-61	1.34567	0.113	0.045	2.10322e-57	ILC2	Decr1
Spcs2	1.60482e-61	0.437872	0.639	0.516	2.45939e-57	ILC2	Spcs2
Zfp704	1.23804e-60	3.28843	0.029	0.003	1.8973e-56	ILC2	Zfp704
Nudt3	1.38647e-60	1.25508	0.132	0.058	2.12477e-56	ILC2	Nudt3
Rcn1	3.57197e-60	1.65776	0.079	0.026	5.47404e-56	ILC2	Rcn1
Rtn3	1.24857e-59	0.772009	0.297	0.185	1.91344e-55	ILC2	Rtn3
Rec8	8.72771e-59	3.27786	0.029	0.003	1.33752e-54	ILC2	Rec8
Dkk3	5.11142e-58	0.925345	0.217	0.121	7.83325e-54	ILC2	Dkk3
Trdv4	8.06231e-58	2.1302	0.051	0.012	1.23555e-53	ILC2	Trdv4
B4galt1	1.51018e-57	1.0227	0.163	0.081	2.31436e-53	ILC2	B4galt1
Tiparp	2.70569e-57	0.525638	0.495	0.367	4.14646e-53	ILC2	Tiparp
Zfp981	2.84131e-57	1.13857	0.146	0.069	4.35431e-53	ILC2	Zfp981
Zeb2	3.95638e-57	1.62863	0.079	0.026	6.06315e-53	ILC2	Zeb2
Bbs9	7.24415e-57	1.94099	0.057	0.015	1.11017e-52	ILC2	Bbs9
S100a11	7.63737e-57	0.47152	0.503	0.373	1.17043e-52	ILC2	S100a11
4930412O13Rik	7.80825e-57	6.50554	0.017	0	1.19662e-52	ILC2	4930412O13Rik
Notch2	2.1504e-56	1.35406	0.099	0.038	3.29548e-52	ILC2	Notch2
Glul	3.44045e-56	0.884851	0.23	0.133	5.27248e-52	ILC2	Glul
Ikzf1	3.92163e-56	0.732333	0.285	0.177	6.00991e-52	ILC2	Ikzf1
Lztfl1	5.96675e-56	0.753784	0.272	0.166	9.14405e-52	ILC2	Lztfl1
Usp3	6.46404e-56	0.960298	0.189	0.101	9.90614e-52	ILC2	Usp3
Psen2	1.06499e-55	0.864134	0.222	0.126	1.63209e-51	ILC2	Psen2
Nxpe3	1.0758e-55	1.88876	0.06	0.017	1.64866e-51	ILC2	Nxpe3
Tktl1	1.10616e-55	7.14496	0.017	0	1.69518e-51	ILC2	Tktl1
Spata13	1.1387e-55	2.08281	0.053	0.013	1.74505e-51	ILC2	Spata13
Abcb9	3.01585e-55	1.07324	0.152	0.075	4.6218e-51	ILC2	Abcb9
H2-T22	7.69753e-55	0.739389	0.269	0.165	1.17965e-50	ILC2	H2-T22
Ada	9.92367e-55	1.70781	0.065	0.019	1.5208e-50	ILC2	Ada
Zc3hav1	1.36466e-54	0.508726	0.536	0.417	2.09134e-50	ILC2	Zc3hav1
Uqcrh	1.85295e-54	0.386659	0.656	0.527	2.83965e-50	ILC2	Uqcrh
Zfand5	2.25941e-54	0.678092	0.505	0.396	3.46255e-50	ILC2	Zfand5
Rem2	3.51908e-54	4.55643	0.02	0.001	5.39298e-50	ILC2	Rem2
Herc4	7.2651e-54	1.06675	0.135	0.063	1.11338e-49	ILC2	Herc4
Dipk1a	7.36385e-54	2.12703	0.048	0.011	1.12851e-49	ILC2	Dipk1a
Flt3l	1.48204e-53	1.09855	0.137	0.065	2.27123e-49	ILC2	Flt3l
Tbck	1.52204e-53	1.21931	0.119	0.052	2.33252e-49	ILC2	Tbck
Crtap	1.82281e-53	2.01369	0.054	0.014	2.79346e-49	ILC2	Crtap
Ppp3ca	2.25465e-53	0.789555	0.252	0.153	3.45525e-49	ILC2	Ppp3ca
Ypel2	2.58179e-53	2.18868	0.049	0.012	3.9566e-49	ILC2	Ypel2
Krt80	4.24632e-53	5.85822	0.017	0	6.50749e-49	ILC2	Krt80
Esyt2	4.8193e-53	0.597952	0.375	0.259	7.38558e-49	ILC2	Esyt2
Akap12	5.71908e-53	4.45718	0.021	0.001	8.7645e-49	ILC2	Akap12
Nedd4	1.50106e-52	0.62518	0.337	0.224	2.30037e-48	ILC2	Nedd4
Cnn2	1.58314e-52	0.57484	0.379	0.261	2.42617e-48	ILC2	Cnn2
Cd47	2.09617e-52	0.456288	0.518	0.392	3.21238e-48	ILC2	Cd47
Pik3ip1	4.49637e-52	1.58996	0.07	0.023	6.89069e-48	ILC2	Pik3ip1
Vrk1	6.87832e-52	0.847582	0.203	0.114	1.0541e-47	ILC2	Vrk1
Dstyk	1.17034e-51	1.79442	0.058	0.016	1.79354e-47	ILC2	Dstyk
Sox8	1.43448e-51	5.78696	0.016	0	2.19834e-47	ILC2	Sox8
Ndufa10	2.43221e-51	0.77175	0.252	0.154	3.72736e-47	ILC2	Ndufa10
Fam174b	3.47761e-51	3.83485	0.021	0.001	5.32944e-47	ILC2	Fam174b
Klf4	4.77751e-51	0.523795	0.637	0.54	7.32154e-47	ILC2	Klf4
H2-DMa	5.87552e-51	1.28711	0.096	0.039	9.00423e-47	ILC2	H2-DMa
St8sia4	9.30773e-51	0.747281	0.242	0.146	1.42641e-46	ILC2	St8sia4
Mc5r	1.0023e-50	7.99493	0.015	0	1.53603e-46	ILC2	Mc5r
Sc5d	1.64332e-50	1.10922	0.13	0.061	2.51839e-46	ILC2	Sc5d
Alad	1.7537e-50	1.41516	0.086	0.033	2.68754e-46	ILC2	Alad
H2-Q7	1.78108e-50	0.225765	0.927	0.845	2.7295e-46	ILC2	H2-Q7
Fam102a	1.83341e-50	0.780464	0.237	0.143	2.8097e-46	ILC2	Fam102a
Acp5	2.48845e-50	1.95108	0.05	0.013	3.81355e-46	ILC2	Acp5
Fgl2	2.55847e-50	0.488331	0.444	0.324	3.92086e-46	ILC2	Fgl2
Gbp3	2.68036e-50	1.64899	0.065	0.021	4.10765e-46	ILC2	Gbp3
Bscl2	2.87067e-50	0.992028	0.145	0.072	4.3993e-46	ILC2	Bscl2
Spry1	3.18543e-50	1.94852	0.064	0.02	4.88167e-46	ILC2	Spry1
Gpi1	4.73639e-50	0.616013	0.332	0.223	7.25852e-46	ILC2	Gpi1
Nfix	7.17772e-50	2.58676	0.033	0.006	1.09998e-45	ILC2	Nfix
Castor1	8.44915e-50	1.57889	0.075	0.027	1.29483e-45	ILC2	Castor1
AB124611	9.55435e-50	3.83367	0.021	0.001	1.4642e-45	ILC2	AB124611
Unc5b	3.43034e-49	7.91363	0.014	0	5.257e-45	ILC2	Unc5b
Rpl36a-ps1	6.42667e-49	1.35811	0.091	0.037	9.84886e-45	ILC2	Rpl36a-ps1
Gm16271	1.0575e-48	2.33998	0.038	0.008	1.62061e-44	ILC2	Gm16271
Ube2e2	1.80044e-48	2.56778	0.032	0.005	2.75917e-44	ILC2	Ube2e2
Cyp11a1	2.7805e-48	5.15874	0.017	0.001	4.26112e-44	ILC2	Cyp11a1
Hpgds	4.18965e-48	2.1959	0.038	0.008	6.42064e-44	ILC2	Hpgds
Ggh	4.63585e-48	1.10591	0.137	0.068	7.10443e-44	ILC2	Ggh
Cops9	5.33081e-48	0.672524	0.286	0.185	8.16946e-44	ILC2	Cops9
Atp5e	6.98835e-48	0.463392	0.497	0.381	1.07096e-43	ILC2	Atp5e
1700025G04Rik	8.08417e-48	2.4695	0.034	0.006	1.2389e-43	ILC2	1700025G04Rik
Slc16a1	9.66686e-48	2.55819	0.032	0.005	1.48145e-43	ILC2	Slc16a1
Txn1	1.37081e-47	0.515625	0.405	0.291	2.10077e-43	ILC2	Txn1
Arhgap15	1.9212e-47	0.727665	0.225	0.134	2.94425e-43	ILC2	Arhgap15
Hspa8	3.25618e-47	0.235639	0.93	0.881	4.99009e-43	ILC2	Hspa8
Grb2	5.11824e-47	0.63633	0.33	0.226	7.8437e-43	ILC2	Grb2
Psme1	5.6686e-47	0.44023	0.54	0.426	8.68712e-43	ILC2	Psme1
Eif2d	9.23185e-47	0.965329	0.147	0.075	1.41478e-42	ILC2	Eif2d
Ikzf3	1.1545e-46	0.388293	0.531	0.402	1.76927e-42	ILC2	Ikzf3
Mbnl1	1.51579e-46	0.37763	0.631	0.518	2.32295e-42	ILC2	Mbnl1
Ntng2	2.39993e-46	1.79442	0.055	0.016	3.67789e-42	ILC2	Ntng2
Gclm	3.79439e-46	1.34638	0.082	0.032	5.8149e-42	ILC2	Gclm
Lcp2	4.82829e-46	0.436897	0.526	0.412	7.39936e-42	ILC2	Lcp2
Mrpl30	7.14381e-46	0.788704	0.215	0.128	1.09479e-41	ILC2	Mrpl30
Padi2	8.0892e-46	0.876718	0.167	0.091	1.23967e-41	ILC2	Padi2
Erap1	9.20177e-46	0.849451	0.187	0.107	1.41017e-41	ILC2	Erap1
Exoc3	1.26026e-45	0.679534	0.269	0.173	1.93134e-41	ILC2	Exoc3
Cct4	1.88401e-45	0.504775	0.409	0.298	2.88724e-41	ILC2	Cct4
Skp1a	2.07834e-45	0.443115	0.471	0.354	3.18505e-41	ILC2	Skp1a
Myo1d	6.68325e-45	2.97817	0.025	0.003	1.02421e-40	ILC2	Myo1d
Jdp2	9.02524e-45	1.18458	0.113	0.053	1.38312e-40	ILC2	Jdp2
Atp1b2	1.03248e-44	3.62007	0.02	0.002	1.58227e-40	ILC2	Atp1b2
H2afz	1.30937e-44	0.595777	0.713	0.633	2.00661e-40	ILC2	H2afz
Pde7b	1.35923e-44	1.06475	0.115	0.054	2.08301e-40	ILC2	Pde7b
Eva1b	5.57903e-44	1.6921	0.056	0.018	8.54986e-40	ILC2	Eva1b
Nucb2	5.94966e-44	4.93439	0.015	0	9.11786e-40	ILC2	Nucb2
Bmp2	1.53211e-43	0.799919	0.129	0.064	2.34796e-39	ILC2	Bmp2
Tap1	2.12733e-43	0.884243	0.178	0.101	3.26014e-39	ILC2	Tap1
Kmo	2.50299e-43	2.8869	0.026	0.004	3.83584e-39	ILC2	Kmo
Tecpr2	2.63171e-43	1.29316	0.085	0.035	4.03309e-39	ILC2	Tecpr2
Rpl9-ps6	4.99857e-43	0.849419	0.173	0.098	7.66031e-39	ILC2	Rpl9-ps6
Bambi	6.35336e-43	1.07663	0.116	0.056	9.73652e-39	ILC2	Bambi
Sh2d2a	6.58609e-43	0.542403	0.35	0.246	1.00932e-38	ILC2	Sh2d2a
Nprl3	7.22617e-43	1.42558	0.07	0.026	1.10741e-38	ILC2	Nprl3
Cct5	8.46254e-43	0.540799	0.348	0.244	1.29688e-38	ILC2	Cct5
Ptp4a2	1.09786e-42	0.397337	0.519	0.406	1.68246e-38	ILC2	Ptp4a2
Kdm1a	1.82115e-42	0.865119	0.168	0.095	2.79091e-38	ILC2	Kdm1a
Rora	2.274e-42	0.294465	0.882	0.838	3.48491e-38	ILC2	Rora
Gfpt2	3.88295e-42	4.91363	0.014	0	5.95062e-38	ILC2	Gfpt2
Il10ra	6.0672e-42	2.48149	0.032	0.007	9.29799e-38	ILC2	Il10ra
Ncf4	6.18447e-42	1.33071	0.079	0.032	9.47769e-38	ILC2	Ncf4
Nkg7	8.8153e-42	0.232028	0.532	0.403	1.35094e-37	ILC2	Nkg7
Rcsd1	1.19769e-41	0.721964	0.214	0.131	1.83546e-37	ILC2	Rcsd1
Ndufa3	1.86147e-41	0.539768	0.321	0.221	2.85271e-37	ILC2	Ndufa3
Gm20388	2.23448e-41	0.65358	0.267	0.176	3.42435e-37	ILC2	Gm20388
Rab26os	2.5535e-41	1.42107	0.072	0.028	3.91324e-37	ILC2	Rab26os
Dst	4.49936e-41	2.22014	0.037	0.009	6.89528e-37	ILC2	Dst
Gnai3	5.45335e-41	0.567674	0.327	0.229	8.35726e-37	ILC2	Gnai3
Osm	6.06235e-41	2.27271	0.035	0.008	9.29055e-37	ILC2	Osm
Plce1	7.00246e-41	5.22014	0.013	0	1.07313e-36	ILC2	Plce1
Crybg1	8.23252e-41	1.41808	0.067	0.025	1.26163e-36	ILC2	Crybg1
Arg1	1.80092e-40	0.434821	0.185	0.107	2.75992e-36	ILC2	Arg1
Hectd2	2.25363e-40	1.48405	0.068	0.026	3.45369e-36	ILC2	Hectd2
Gfi1	3.5526e-40	1.9617	0.038	0.01	5.44436e-36	ILC2	Gfi1
Ddx39b	4.13877e-40	0.509704	0.359	0.258	6.34266e-36	ILC2	Ddx39b
Scin	5.10448e-40	3.5927	0.021	0.003	7.82262e-36	ILC2	Scin
Ndufa4	5.58713e-40	0.361757	0.535	0.42	8.56227e-36	ILC2	Ndufa4
Sorbs1	6.11779e-40	1.62188	0.067	0.025	9.37551e-36	ILC2	Sorbs1
Chrne	7.00885e-40	1.69588	0.053	0.017	1.07411e-35	ILC2	Chrne
Itpr3	1.18734e-39	0.971389	0.133	0.07	1.8196e-35	ILC2	Itpr3
Coro2a	2.20694e-39	0.440853	0.442	0.336	3.38214e-35	ILC2	Coro2a
Mrpl33	2.83987e-39	0.678264	0.243	0.158	4.3521e-35	ILC2	Mrpl33
Asb5	3.58595e-39	2.81816	0.024	0.004	5.49547e-35	ILC2	Asb5
Dcaf7	4.46007e-39	0.97939	0.123	0.063	6.83506e-35	ILC2	Dcaf7
Gm5127	5.1061e-39	2.74154	0.023	0.003	7.8251e-35	ILC2	Gm5127
Cbarp	1.49965e-38	0.749946	0.194	0.118	2.29822e-34	ILC2	Cbarp
Dennd4a	1.53956e-38	0.347741	0.52	0.404	2.35937e-34	ILC2	Dennd4a
Mia2	2.62597e-38	0.460257	0.396	0.292	4.0243e-34	ILC2	Mia2
Plaat3	3.88267e-38	0.458034	0.412	0.311	5.9502e-34	ILC2	Plaat3
Eif3h	3.93658e-38	0.343354	0.599	0.498	6.03281e-34	ILC2	Eif3h
Slc30a2	3.9931e-38	5.638	0.012	0	6.11942e-34	ILC2	Slc30a2
Pkia	4.05899e-38	4.90464	0.013	0	6.2204e-34	ILC2	Pkia
Cisd1	4.53981e-38	1.0656	0.092	0.042	6.95725e-34	ILC2	Cisd1
Ndufa6	5.22322e-38	0.384484	0.533	0.428	8.00459e-34	ILC2	Ndufa6
Lonrf1	7.20785e-38	2.76446	0.022	0.003	1.1046e-33	ILC2	Lonrf1
Cfap20	7.71068e-38	1.07312	0.105	0.051	1.18166e-33	ILC2	Cfap20
Smpdl3a	9.41604e-38	0.42585	0.417	0.311	1.44301e-33	ILC2	Smpdl3a
Slc35g1	1.19508e-37	3.48693	0.017	0.001	1.83147e-33	ILC2	Slc35g1
AC149090.1	1.26278e-37	0.573131	0.355	0.26	1.93521e-33	ILC2	AC149090.1
Atp5c1	1.38978e-37	0.401236	0.49	0.385	2.12983e-33	ILC2	Atp5c1
Zfp638	1.6315e-37	0.70501	0.226	0.145	2.50027e-33	ILC2	Zfp638
Bcl2	2.1574e-37	0.359779	0.465	0.355	3.30621e-33	ILC2	Bcl2
Csf1	2.27135e-37	2.77863	0.022	0.003	3.48084e-33	ILC2	Csf1
Mtrr	3.87822e-37	1.7383	0.044	0.013	5.94337e-33	ILC2	Mtrr
Fam92a	3.91363e-37	1.58886	0.05	0.017	5.99764e-33	ILC2	Fam92a
Snrpe	4.22231e-37	0.392933	0.445	0.338	6.47069e-33	ILC2	Snrpe
Atp5mpl	5.22581e-37	0.499346	0.354	0.257	8.00855e-33	ILC2	Atp5mpl
Stk17b	1.10431e-36	0.264983	0.778	0.682	1.69236e-32	ILC2	Stk17b
Pabpc4	1.21344e-36	0.853026	0.145	0.081	1.8596e-32	ILC2	Pabpc4
Dock1	1.31582e-36	4.88039	0.013	0	2.0165e-32	ILC2	Dock1
Adgrl2	1.64876e-36	3.20846	0.018	0.002	2.52672e-32	ILC2	Adgrl2
Irak3	1.9219e-36	0.563217	0.253	0.167	2.94531e-32	ILC2	Irak3
Sh3bgrl	2.22457e-36	0.711952	0.204	0.128	3.40916e-32	ILC2	Sh3bgrl
Hgsnat	3.43285e-36	1.06701	0.103	0.05	5.26084e-32	ILC2	Hgsnat
Hmgb2	5.0772e-36	0.335296	0.626	0.532	7.78082e-32	ILC2	Hmgb2
A630072M18Rik	5.08228e-36	1.13638	0.112	0.057	7.78859e-32	ILC2	A630072M18Rik
Wdr83os	5.94171e-36	0.586336	0.273	0.187	9.10568e-32	ILC2	Wdr83os
Dach2	1.06119e-35	4.08804	0.014	0.001	1.62628e-31	ILC2	Dach2
Src	1.31344e-35	1.64996	0.049	0.016	2.01285e-31	ILC2	Src
Vipr2	1.60553e-35	0.653913	0.16	0.093	2.46048e-31	ILC2	Vipr2
Zcchc10	1.81812e-35	1.11717	0.086	0.039	2.78627e-31	ILC2	Zcchc10
Btf3	1.96925e-35	0.253398	0.799	0.722	3.01788e-31	ILC2	Btf3
Eif4b	2.07311e-35	0.492211	0.311	0.219	3.17704e-31	ILC2	Eif4b
Fzd6	2.30156e-35	2.74621	0.021	0.003	3.52714e-31	ILC2	Fzd6
Tmem50a	3.52978e-35	0.341723	0.541	0.435	5.40939e-31	ILC2	Tmem50a
Enah	3.94468e-35	4.24251	0.013	0.001	6.04522e-31	ILC2	Enah
Pard3b	4.9626e-35	3.18698	0.017	0.002	7.60519e-31	ILC2	Pard3b
Samd9l	6.76902e-35	0.712036	0.208	0.133	1.03735e-30	ILC2	Samd9l
B630019A10Rik	8.49466e-35	5.31607	0.011	0	1.30181e-30	ILC2	B630019A10Rik
Ldlrad4	1.21706e-34	1.17692	0.099	0.049	1.86515e-30	ILC2	Ldlrad4
Dctn6	1.38213e-34	0.718857	0.184	0.113	2.11812e-30	ILC2	Dctn6
Hint1	1.43008e-34	0.376209	0.497	0.397	2.1916e-30	ILC2	Hint1
Ppp2r5c	1.89656e-34	0.522158	0.284	0.197	2.90647e-30	ILC2	Ppp2r5c
Miga1	2.36936e-34	2.33944	0.027	0.006	3.63104e-30	ILC2	Miga1
Setdb2	2.83101e-34	1.44521	0.061	0.024	4.33852e-30	ILC2	Setdb2
Itm2a	3.85195e-34	2.23574	0.027	0.006	5.90312e-30	ILC2	Itm2a
Rtraf	4.67841e-34	0.500744	0.301	0.212	7.16966e-30	ILC2	Rtraf
Plec	6.23599e-34	1.41843	0.054	0.02	9.55666e-30	ILC2	Plec
Ikbip	6.39559e-34	1.25677	0.074	0.032	9.80124e-30	ILC2	Ikbip
Rbms1	1.19634e-33	0.533566	0.279	0.193	1.83339e-29	ILC2	Rbms1
Naip6	1.66455e-33	2.67184	0.021	0.003	2.55092e-29	ILC2	Naip6
Lat	1.89309e-33	0.566945	0.221	0.144	2.90116e-29	ILC2	Lat
Ptprc	2.10586e-33	0.196126	0.819	0.716	3.22723e-29	ILC2	Ptprc
Ebpl	2.27544e-33	1.09068	0.081	0.037	3.48711e-29	ILC2	Ebpl
Cd52	3.0358e-33	0.475275	0.619	0.532	4.65236e-29	ILC2	Cd52
Calm3	4.00321e-33	0.574325	0.259	0.177	6.13492e-29	ILC2	Calm3
Wipf3	4.40636e-33	7.39007	0.01	0	6.75275e-29	ILC2	Wipf3
Cyth3	5.38548e-33	1.29137	0.068	0.029	8.25325e-29	ILC2	Cyth3
P2rx4	5.84732e-33	1.06873	0.098	0.049	8.96102e-29	ILC2	P2rx4
Baz1a	9.05882e-33	0.621092	0.251	0.172	1.38826e-28	ILC2	Baz1a
Gm9920	1.65213e-32	4.26454	0.012	0.001	2.53188e-28	ILC2	Gm9920
Eif3i	1.7236e-32	0.487449	0.341	0.252	2.64142e-28	ILC2	Eif3i
Mapk12	2.29799e-32	2.41892	0.022	0.004	3.52167e-28	ILC2	Mapk12
Hrh4	2.51441e-32	5.864	0.01	0	3.85334e-28	ILC2	Hrh4
Impact	4.09645e-32	0.855444	0.127	0.071	6.27782e-28	ILC2	Impact
Mpped2	4.64975e-32	3.5156	0.015	0.001	7.12574e-28	ILC2	Mpped2
Jcad	5.07467e-32	5.47753	0.01	0	7.77693e-28	ILC2	Jcad
2610507B11Rik	5.36777e-32	0.762062	0.168	0.103	8.22611e-28	ILC2	2610507B11Rik
Rgs18	6.42774e-32	1.85369	0.033	0.009	9.85052e-28	ILC2	Rgs18
Pla2g7	6.51156e-32	3.2163	0.019	0.003	9.97896e-28	ILC2	Pla2g7
Phgdh	6.62628e-32	1.3066	0.062	0.026	1.01548e-27	ILC2	Phgdh
Aldh1l1	7.85989e-32	2.89474	0.018	0.002	1.20453e-27	ILC2	Aldh1l1
Gm26708	8.01725e-32	2.84073	0.018	0.002	1.22864e-27	ILC2	Gm26708
Tbc1d10a	8.10442e-32	1.10204	0.087	0.042	1.242e-27	ILC2	Tbc1d10a
H2-D1	9.20608e-32	0.11267	0.999	0.997	1.41083e-27	ILC2	H2-D1
Wdr89	9.48776e-32	0.842929	0.13	0.074	1.454e-27	ILC2	Wdr89
Epb41l4aos	1.25482e-31	1.00978	0.102	0.053	1.92301e-27	ILC2	Epb41l4aos
Mdn1	1.31529e-31	0.965002	0.094	0.047	2.01568e-27	ILC2	Mdn1
Gm6213	1.588e-31	4.69819	0.011	0	2.43362e-27	ILC2	Gm6213
4921511I17Rik	1.60631e-31	4.44896	0.011	0	2.46167e-27	ILC2	4921511I17Rik
Mbd1	1.86657e-31	0.971813	0.104	0.054	2.86051e-27	ILC2	Mbd1
Chd3	3.18601e-31	0.43699	0.326	0.238	4.88255e-27	ILC2	Chd3
Mdh1	3.48311e-31	0.40886	0.432	0.342	5.33787e-27	ILC2	Mdh1
Dennd2d	6.5549e-31	1.13901	0.077	0.036	1.00454e-26	ILC2	Dennd2d
Cttn	7.54862e-31	2.17098	0.026	0.006	1.15683e-26	ILC2	Cttn
Lif	1.25502e-30	1.17772	0.086	0.042	1.92331e-26	ILC2	Lif
Fcer1a	1.41308e-30	4.31607	0.011	0	2.16555e-26	ILC2	Fcer1a
Cnpy2	1.61447e-30	0.899721	0.114	0.062	2.47418e-26	ILC2	Cnpy2
Osbpl8	1.70183e-30	0.710282	0.153	0.092	2.60806e-26	ILC2	Osbpl8
Ythdc1	1.80949e-30	0.426393	0.492	0.405	2.77305e-26	ILC2	Ythdc1
Pgm2l1	2.29405e-30	0.614458	0.211	0.14	3.51563e-26	ILC2	Pgm2l1
Gpx7	2.65721e-30	2.22448	0.024	0.005	4.07217e-26	ILC2	Gpx7
1700016P03Rik	3.14116e-30	0.678109	0.227	0.155	4.81383e-26	ILC2	1700016P03Rik
Kcnd2	3.6468e-30	3.97503	0.011	0.001	5.58871e-26	ILC2	Kcnd2
Tinf2	4.7488e-30	0.60659	0.246	0.171	7.27753e-26	ILC2	Tinf2
Itpr2	5.36849e-30	0.461999	0.305	0.221	8.2272e-26	ILC2	Itpr2
Pon3	7.14992e-30	1.54858	0.04	0.013	1.09573e-25	ILC2	Pon3
Syne1	8.80384e-30	0.96049	0.116	0.065	1.34919e-25	ILC2	Syne1
Hacd3	8.97497e-30	0.74801	0.165	0.103	1.37541e-25	ILC2	Hacd3
Fndc3a	1.49887e-29	0.634707	0.197	0.129	2.29703e-25	ILC2	Fndc3a
Rb1	1.54234e-29	0.601274	0.215	0.144	2.36364e-25	ILC2	Rb1
Gm43305	1.56553e-29	1.04402	0.142	0.085	2.39918e-25	ILC2	Gm43305
Rbpj	1.81699e-29	0.511001	0.312	0.229	2.78453e-25	ILC2	Rbpj
Atp5o.1	1.8963e-29	0.491293	0.301	0.22	2.90607e-25	ILC2	Atp5o.1
Ncl	2.05251e-29	0.234177	0.87	0.821	3.14547e-25	ILC2	Ncl
Gkap1	2.13407e-29	1.52415	0.041	0.014	3.27046e-25	ILC2	Gkap1
Prdx1	2.83675e-29	0.376179	0.459	0.367	4.34732e-25	ILC2	Prdx1
Elk4	3.56236e-29	0.690875	0.165	0.103	5.45932e-25	ILC2	Elk4
Atp5l	5.65104e-29	0.281588	0.6	0.508	8.66022e-25	ILC2	Atp5l
Ddit4	7.39298e-29	1.3563	0.054	0.022	1.13297e-24	ILC2	Ddit4
Dync1h1	8.11309e-29	0.652677	0.176	0.112	1.24333e-24	ILC2	Dync1h1
Kidins220	8.26018e-29	0.860315	0.116	0.065	1.26587e-24	ILC2	Kidins220
Stat1	9.08448e-29	0.629233	0.197	0.13	1.3922e-24	ILC2	Stat1
H2-Q4	1.02617e-28	0.291485	0.596	0.502	1.57261e-24	ILC2	H2-Q4
Nuak2	1.07421e-28	4.18362	0.011	0.001	1.64623e-24	ILC2	Nuak2
Xxylt1	1.51497e-28	1.42354	0.047	0.018	2.3217e-24	ILC2	Xxylt1
Acadl	1.58309e-28	0.4972	0.285	0.206	2.42608e-24	ILC2	Acadl
Vill	1.70071e-28	1.96816	0.027	0.007	2.60634e-24	ILC2	Vill
Pitpnc1	2.53089e-28	0.609048	0.193	0.126	3.87859e-24	ILC2	Pitpnc1
Nme1	3.22277e-28	0.510794	0.291	0.213	4.93889e-24	ILC2	Nme1
Synj1	3.73248e-28	1.01427	0.083	0.041	5.72003e-24	ILC2	Synj1
Tex9	3.7472e-28	1.39509	0.047	0.018	5.74258e-24	ILC2	Tex9
Abhd17b	4.46722e-28	0.69027	0.192	0.127	6.84602e-24	ILC2	Abhd17b
Ppp1r9b	4.78105e-28	0.756037	0.129	0.076	7.32696e-24	ILC2	Ppp1r9b
Fbl	7.21512e-28	0.514507	0.24	0.167	1.10572e-23	ILC2	Fbl
Psma5	7.65713e-28	0.583966	0.195	0.129	1.17346e-23	ILC2	Psma5
Fam117a	7.85317e-28	1.19925	0.064	0.028	1.2035e-23	ILC2	Fam117a
AU020206	1.41778e-27	0.421866	0.441	0.357	2.17275e-23	ILC2	AU020206
Eif4ebp2	1.43256e-27	0.561823	0.229	0.158	2.1954e-23	ILC2	Eif4ebp2
Ddb1	1.49501e-27	0.704828	0.161	0.102	2.2911e-23	ILC2	Ddb1
Anp32b	1.85906e-27	0.372102	0.412	0.323	2.84901e-23	ILC2	Anp32b
Ccm2	2.40137e-27	0.713667	0.162	0.103	3.6801e-23	ILC2	Ccm2
Ccdc171	2.62412e-27	1.33407	0.052	0.021	4.02146e-23	ILC2	Ccdc171
Cuedc2	3.21055e-27	0.956047	0.096	0.051	4.92016e-23	ILC2	Cuedc2
Fam118b	3.47882e-27	1.44567	0.044	0.017	5.33128e-23	ILC2	Fam118b
Sh3pxd2a	3.52513e-27	2.78823	0.016	0.003	5.40226e-23	ILC2	Sh3pxd2a
Nipal1	3.76814e-27	3.36582	0.013	0.001	5.77467e-23	ILC2	Nipal1
Ms4a6c	3.92493e-27	1.44772	0.044	0.016	6.01495e-23	ILC2	Ms4a6c
Hist3h2a	4.45965e-27	0.969736	0.096	0.051	6.83441e-23	ILC2	Hist3h2a
Snrpd2	5.07137e-27	0.436211	0.317	0.237	7.77187e-23	ILC2	Snrpd2
Use1	7.03551e-27	0.358764	0.422	0.335	1.07819e-22	ILC2	Use1
Pygl	7.93747e-27	1.0403	0.075	0.037	1.21642e-22	ILC2	Pygl
Gapdh	8.58882e-27	0.239994	0.756	0.673	1.31624e-22	ILC2	Gapdh
Sema6d	1.00839e-26	1.87222	0.03	0.009	1.54535e-22	ILC2	Sema6d
Cuedc1	1.1306e-26	1.15914	0.064	0.029	1.73264e-22	ILC2	Cuedc1
Abcb1b	1.20505e-26	0.655728	0.149	0.093	1.84673e-22	ILC2	Abcb1b
Adcy3	1.27688e-26	1.87848	0.026	0.007	1.95683e-22	ILC2	Adcy3
Sp140	1.47157e-26	0.764192	0.122	0.071	2.25519e-22	ILC2	Sp140
Nedd9	1.48609e-26	0.473453	0.312	0.233	2.27743e-22	ILC2	Nedd9
Amph	1.71219e-26	1.9495	0.027	0.007	2.62393e-22	ILC2	Amph
Bhlhb9	1.78431e-26	1.80511	0.031	0.009	2.73446e-22	ILC2	Bhlhb9
Asxl2	1.86971e-26	0.618227	0.187	0.124	2.86533e-22	ILC2	Asxl2
Cox7a2	2.24274e-26	0.321874	0.456	0.367	3.437e-22	ILC2	Cox7a2
Psmd13	2.30418e-26	0.561962	0.215	0.148	3.53116e-22	ILC2	Psmd13
Kdsr	2.74164e-26	1.05036	0.078	0.039	4.20156e-22	ILC2	Kdsr
Gnaq	2.90075e-26	0.907063	0.095	0.051	4.4454e-22	ILC2	Gnaq
Synpo2	3.10666e-26	2.9244	0.014	0.002	4.76095e-22	ILC2	Synpo2
Serpinb6a	3.98086e-26	1.02454	0.074	0.037	6.10067e-22	ILC2	Serpinb6a
Ncoa2	5.15307e-26	0.673351	0.16	0.102	7.89707e-22	ILC2	Ncoa2
Slc25a5	5.99431e-26	0.289595	0.622	0.541	9.18629e-22	ILC2	Slc25a5
Eif3m	6.08224e-26	0.317011	0.477	0.388	9.32104e-22	ILC2	Eif3m
Rras2	6.33113e-26	1.31075	0.049	0.02	9.70245e-22	ILC2	Rras2
Bora	8.24686e-26	1.85955	0.028	0.008	1.26383e-21	ILC2	Bora
Ndufb5	9.42805e-26	0.474812	0.278	0.204	1.44485e-21	ILC2	Ndufb5
Rps6ka1	1.19155e-25	0.830953	0.111	0.064	1.82605e-21	ILC2	Rps6ka1
Gm9750	1.38481e-25	1.15774	0.061	0.028	2.12222e-21	ILC2	Gm9750
Mettl23	1.99258e-25	0.573959	0.178	0.117	3.05363e-21	ILC2	Mettl23
Rtf1	2.06635e-25	0.525892	0.22	0.153	3.16668e-21	ILC2	Rtf1
Mns1	2.18952e-25	1.6561	0.037	0.013	3.35545e-21	ILC2	Mns1
Anp32e	2.25017e-25	0.564145	0.221	0.155	3.44838e-21	ILC2	Anp32e
Man1a	2.3245e-25	0.489669	0.252	0.18	3.56229e-21	ILC2	Man1a
Dusp1	2.55595e-25	0.191014	0.908	0.875	3.91699e-21	ILC2	Dusp1
Rpl10-ps3	2.65523e-25	0.528098	0.227	0.159	4.06914e-21	ILC2	Rpl10-ps3
Irf4	3.38491e-25	2.15303	0.033	0.011	5.18737e-21	ILC2	Irf4
Slc31a2	3.55757e-25	1.5936	0.038	0.013	5.45198e-21	ILC2	Slc31a2
Mthfd1l	3.64216e-25	1.34897	0.043	0.017	5.58161e-21	ILC2	Mthfd1l
Psip1	3.92584e-25	0.432892	0.294	0.218	6.01634e-21	ILC2	Psip1
Chsy3	4.20583e-25	1.98643	0.025	0.007	6.44543e-21	ILC2	Chsy3
4930417O13Rik	4.58279e-25	2.44665	0.017	0.003	7.02313e-21	ILC2	4930417O13Rik
Myl10	5.39174e-25	2.95485	0.014	0.002	8.26285e-21	ILC2	Myl10
Slc25a19	5.84933e-25	1.23442	0.052	0.022	8.96409e-21	ILC2	Slc25a19
Cltc	5.99754e-25	0.550369	0.234	0.166	9.19123e-21	ILC2	Cltc
Grap	6.63362e-25	0.832717	0.091	0.049	1.0166e-20	ILC2	Grap
Gm26917	6.81647e-25	0.921142	0.105	0.06	1.04462e-20	ILC2	Gm26917
Micos13	1.11087e-24	0.516394	0.212	0.147	1.70241e-20	ILC2	Micos13
Atl3	1.14335e-24	0.706938	0.142	0.089	1.75219e-20	ILC2	Atl3
Tle1	1.41201e-24	1.59588	0.036	0.013	2.1639e-20	ILC2	Tle1
Plpp5	1.53502e-24	1.19146	0.054	0.024	2.35242e-20	ILC2	Plpp5
Trim13	1.56938e-24	1.8599	0.03	0.009	2.40507e-20	ILC2	Trim13
Map2k3	1.62842e-24	0.699923	0.146	0.092	2.49556e-20	ILC2	Map2k3
Atp5b	2.00214e-24	0.24269	0.65	0.569	3.06828e-20	ILC2	Atp5b
Raver2	2.35495e-24	1.98381	0.023	0.006	3.60896e-20	ILC2	Raver2
Gas2l3	2.79692e-24	2.92849	0.013	0.002	4.28628e-20	ILC2	Gas2l3
Plxdc2	2.96376e-24	0.535933	0.209	0.145	4.54196e-20	ILC2	Plxdc2
Galnt7	3.49582e-24	0.779935	0.125	0.076	5.35734e-20	ILC2	Galnt7
Cnnm2	3.54348e-24	0.556389	0.188	0.127	5.43038e-20	ILC2	Cnnm2
Abcb1a	3.84076e-24	0.315907	0.338	0.255	5.88597e-20	ILC2	Abcb1a
Dhrs7	3.96342e-24	0.666745	0.154	0.099	6.07395e-20	ILC2	Dhrs7
Sh3kbp1	4.25172e-24	0.35883	0.37	0.289	6.51576e-20	ILC2	Sh3kbp1
Rnf130	4.43251e-24	0.356194	0.367	0.287	6.79282e-20	ILC2	Rnf130
Fam216a	7.10947e-24	0.921963	0.081	0.043	1.08953e-19	ILC2	Fam216a
Dtnbp1	7.93793e-24	0.797112	0.112	0.066	1.21649e-19	ILC2	Dtnbp1
Mov10	8.76441e-24	1.24614	0.049	0.021	1.34315e-19	ILC2	Mov10
Gm11361	9.05783e-24	1.2598	0.048	0.02	1.38811e-19	ILC2	Gm11361
Mxd4	1.09364e-23	0.476178	0.248	0.18	1.67601e-19	ILC2	Mxd4
Rrm2b	1.26265e-23	0.547777	0.197	0.135	1.93501e-19	ILC2	Rrm2b
Ppme1	1.33669e-23	0.719596	0.12	0.072	2.04848e-19	ILC2	Ppme1
Gramd4	1.34193e-23	1.18518	0.051	0.022	2.0565e-19	ILC2	Gramd4
Gprasp2	1.54557e-23	3.41982	0.011	0.001	2.36859e-19	ILC2	Gprasp2
Csk	1.57718e-23	0.375578	0.338	0.261	2.41703e-19	ILC2	Csk
Adh1	1.72406e-23	3.65925	0.01	0.001	2.64212e-19	ILC2	Adh1
Hic1	2.07823e-23	0.845924	0.094	0.053	3.18489e-19	ILC2	Hic1
Sppl3	2.32739e-23	0.694183	0.15	0.097	3.56672e-19	ILC2	Sppl3
Vps54	2.69222e-23	0.603158	0.164	0.108	4.12583e-19	ILC2	Vps54
Pwp1	3.11472e-23	1.05655	0.074	0.038	4.77331e-19	ILC2	Pwp1
Gm42372	3.24812e-23	2.80511	0.013	0.002	4.97774e-19	ILC2	Gm42372
Camk2b	4.77409e-23	0.931916	0.082	0.044	7.31629e-19	ILC2	Camk2b
Ccnd2	5.17323e-23	0.275417	0.494	0.406	7.92798e-19	ILC2	Ccnd2
Fads1	5.27454e-23	2.26669	0.018	0.004	8.08323e-19	ILC2	Fads1
Matk	6.98607e-23	3.01923	0.012	0.002	1.07062e-18	ILC2	Matk
Psmb1	7.30444e-23	0.264317	0.502	0.416	1.11941e-18	ILC2	Psmb1
Tapbp	7.36402e-23	0.470707	0.238	0.171	1.12854e-18	ILC2	Tapbp
Gm43445	7.855e-23	2.34725	0.017	0.003	1.20378e-18	ILC2	Gm43445
Scamp1	7.97415e-23	2.54877	0.015	0.003	1.22204e-18	ILC2	Scamp1
Casc4	8.15823e-23	2.26231	0.017	0.004	1.25025e-18	ILC2	Casc4
Ap1s3	8.57296e-23	1.54985	0.034	0.012	1.31381e-18	ILC2	Ap1s3
Pde3b	8.65416e-23	0.625902	0.155	0.101	1.32625e-18	ILC2	Pde3b
Fzd4	9.82259e-23	1.26835	0.043	0.018	1.50531e-18	ILC2	Fzd4
Slc16a7	1.01264e-22	2.96949	0.013	0.002	1.55187e-18	ILC2	Slc16a7
Tnfsf10	1.09966e-22	0.879959	0.09	0.05	1.68523e-18	ILC2	Tnfsf10
Plk2	1.42475e-22	1.20617	0.052	0.023	2.18344e-18	ILC2	Plk2
Rgs12	1.612e-22	1.10964	0.056	0.026	2.47038e-18	ILC2	Rgs12
Rnpepl1	2.04464e-22	0.942609	0.079	0.043	3.13342e-18	ILC2	Rnpepl1
Ecm1	2.69252e-22	1.10571	0.06	0.029	4.12628e-18	ILC2	Ecm1
Gm14718	3.29244e-22	3.43982	0.01	0.001	5.04567e-18	ILC2	Gm14718
Phf11b	3.41867e-22	2.04457	0.019	0.004	5.23911e-18	ILC2	Phf11b
Ppp1r18	4.37459e-22	0.372328	0.33	0.256	6.70406e-18	ILC2	Ppp1r18
Unc5a	4.41057e-22	2.13161	0.017	0.004	6.7592e-18	ILC2	Unc5a
Stim1	4.6315e-22	0.501125	0.219	0.156	7.09778e-18	ILC2	Stim1
Gm27166	5.09676e-22	3.0354	0.012	0.001	7.81078e-18	ILC2	Gm27166
Ppa1	5.59404e-22	0.857714	0.078	0.042	8.57286e-18	ILC2	Ppa1
Ecpas	5.79782e-22	0.611444	0.148	0.096	8.88516e-18	ILC2	Ecpas
Lsm6	6.2378e-22	0.537945	0.176	0.119	9.55943e-18	ILC2	Lsm6
1110038B12Rik	6.27295e-22	0.646359	0.126	0.078	9.6133e-18	ILC2	1110038B12Rik
Fundc2	6.29906e-22	0.552306	0.162	0.108	9.65332e-18	ILC2	Fundc2
Cd24a	7.17005e-22	2.35174	0.021	0.005	1.09881e-17	ILC2	Cd24a
Fastkd3	7.81019e-22	2.09461	0.019	0.005	1.19691e-17	ILC2	Fastkd3
Psat1	8.2973e-22	1.32706	0.037	0.014	1.27156e-17	ILC2	Psat1
Slfn5	8.53324e-22	1.77374	0.019	0.005	1.30772e-17	ILC2	Slfn5
Pi4ka	8.85178e-22	0.788192	0.092	0.052	1.35654e-17	ILC2	Pi4ka
Pfdn5	1.09575e-21	0.225825	0.671	0.596	1.67924e-17	ILC2	Pfdn5
Ralbp1	1.12441e-21	0.443194	0.268	0.201	1.72316e-17	ILC2	Ralbp1
Bmpr2	1.14694e-21	1.01748	0.057	0.027	1.75768e-17	ILC2	Bmpr2
Nin	1.16793e-21	0.621956	0.145	0.094	1.78985e-17	ILC2	Nin
Kif13b	1.17976e-21	0.954566	0.067	0.034	1.80798e-17	ILC2	Kif13b
Ddah1	1.19434e-21	1.57174	0.03	0.01	1.83033e-17	ILC2	Ddah1
Emg1	1.3682e-21	0.344341	0.361	0.285	2.09677e-17	ILC2	Emg1
Atp13a3	1.45899e-21	0.738871	0.098	0.057	2.2359e-17	ILC2	Atp13a3
Aprt	1.57661e-21	0.416177	0.258	0.19	2.41615e-17	ILC2	Aprt
Tomm34	1.70856e-21	0.541813	0.187	0.129	2.61836e-17	ILC2	Tomm34
Vopp1	1.85382e-21	0.852671	0.081	0.044	2.84098e-17	ILC2	Vopp1
Aebp2	2.88927e-21	0.429826	0.265	0.198	4.4278e-17	ILC2	Aebp2
Pitpnm2	3.01823e-21	1.79	0.022	0.006	4.62543e-17	ILC2	Pitpnm2
Sh3bgrl3	3.41932e-21	0.20985	0.817	0.75	5.24011e-17	ILC2	Sh3bgrl3
Vars	4.17662e-21	0.35126	0.356	0.282	6.40068e-17	ILC2	Vars
Gm5547	4.26139e-21	1.62394	0.029	0.01	6.53059e-17	ILC2	Gm5547
Cdk11b	4.58476e-21	0.402194	0.531	0.469	7.02614e-17	ILC2	Cdk11b
Ywhab	4.74622e-21	0.324421	0.373	0.297	7.27358e-17	ILC2	Ywhab
Acss1	5.20231e-21	1.95711	0.02	0.005	7.97254e-17	ILC2	Acss1
Simc1	5.70881e-21	1.16684	0.049	0.022	8.74875e-17	ILC2	Simc1
Prelid1	6.47881e-21	0.360392	0.311	0.239	9.92878e-17	ILC2	Prelid1
Casp1	6.92407e-21	0.599192	0.158	0.106	1.06111e-16	ILC2	Casp1
Snrpf	6.99894e-21	0.287829	0.513	0.438	1.07259e-16	ILC2	Snrpf
Dmxl2	7.73606e-21	2.94261	0.011	0.002	1.18555e-16	ILC2	Dmxl2
Slc39a4	7.91582e-21	0.764108	0.097	0.057	1.2131e-16	ILC2	Slc39a4
Snrpd1	8.95285e-21	0.490888	0.205	0.146	1.37202e-16	ILC2	Snrpd1
Lrp1	8.97623e-21	1.32271	0.038	0.015	1.37561e-16	ILC2	Lrp1
Pla2g12a	1.00631e-20	1.95535	0.02	0.005	1.54217e-16	ILC2	Pla2g12a
Cxcl1	1.0065e-20	2.47829	0.021	0.006	1.54246e-16	ILC2	Cxcl1
Prodh	1.02699e-20	1.98344	0.019	0.005	1.57387e-16	ILC2	Prodh
Sec24d	1.13543e-20	0.848174	0.085	0.048	1.74005e-16	ILC2	Sec24d
Tmem238	1.166e-20	1.44867	0.032	0.012	1.7869e-16	ILC2	Tmem238
Ndufa1	1.1958e-20	0.397167	0.277	0.21	1.83256e-16	ILC2	Ndufa1
Ostc	1.21649e-20	0.409735	0.265	0.199	1.86426e-16	ILC2	Ostc
Impa2	1.28136e-20	1.22496	0.042	0.018	1.96369e-16	ILC2	Impa2
Pomgnt1	1.49023e-20	1.24811	0.042	0.018	2.28378e-16	ILC2	Pomgnt1
Bola2	1.72112e-20	0.677195	0.129	0.082	2.63761e-16	ILC2	Bola2
Ptger4	1.97135e-20	0.778992	0.088	0.05	3.0211e-16	ILC2	Ptger4
Huwe1	2.185e-20	0.392213	0.262	0.197	3.34851e-16	ILC2	Huwe1
Ddx24	2.27672e-20	0.388128	0.314	0.244	3.48907e-16	ILC2	Ddx24
Srrd	2.46221e-20	0.541234	0.171	0.117	3.77333e-16	ILC2	Srrd
Dtnb	2.64389e-20	0.776734	0.092	0.054	4.05177e-16	ILC2	Dtnb
Rfx7	2.72669e-20	0.589042	0.149	0.099	4.17866e-16	ILC2	Rfx7
Gm13012	2.76781e-20	1.51741	0.031	0.011	4.24168e-16	ILC2	Gm13012
Cyld	2.78337e-20	0.493213	0.222	0.162	4.26551e-16	ILC2	Cyld
Trappc6a	3.4822e-20	0.595778	0.131	0.084	5.33648e-16	ILC2	Trappc6a
Lsamp	4.18888e-20	3.2412	0.01	0.001	6.41947e-16	ILC2	Lsamp
4930579G24Rik	4.33217e-20	2.32511	0.015	0.003	6.63905e-16	ILC2	4930579G24Rik
Emilin1	4.44357e-20	2.06814	0.017	0.004	6.80978e-16	ILC2	Emilin1
Map4k1	4.5845e-20	0.962478	0.069	0.037	7.02574e-16	ILC2	Map4k1
Gm13212	4.8608e-20	0.867127	0.08	0.044	7.44917e-16	ILC2	Gm13212
Cox6b1	5.49644e-20	0.24439	0.481	0.399	8.42329e-16	ILC2	Cox6b1
Sptssa	5.9474e-20	0.32021	0.443	0.371	9.11439e-16	ILC2	Sptssa
Rpl36al	6.26484e-20	0.21913	0.569	0.488	9.60087e-16	ILC2	Rpl36al
Atp5j2	6.46175e-20	0.340171	0.335	0.264	9.90264e-16	ILC2	Atp5j2
Gm12316	7.37224e-20	2.93635	0.01	0.001	1.1298e-15	ILC2	Gm12316
Txnl4a	7.44283e-20	0.874622	0.077	0.043	1.14061e-15	ILC2	Txnl4a
Ltb4r1	7.9796e-20	0.482459	0.16	0.108	1.22287e-15	ILC2	Ltb4r1
Ifitm10	8.00141e-20	1.90698	0.019	0.005	1.22622e-15	ILC2	Ifitm10
Snrpg	9.1547e-20	0.203326	0.688	0.615	1.40296e-15	ILC2	Snrpg
Ifit1	9.55092e-20	1.40301	0.021	0.006	1.46368e-15	ILC2	Ifit1
Dleu2	1.01988e-19	0.841225	0.074	0.04	1.56297e-15	ILC2	Dleu2
Arl6ip5	1.59191e-19	0.393934	0.342	0.276	2.43961e-15	ILC2	Arl6ip5
Dpp4	1.81609e-19	1.4618	0.029	0.01	2.78316e-15	ILC2	Dpp4
Aimp1	2.38737e-19	0.493949	0.188	0.134	3.65864e-15	ILC2	Aimp1
Msn	2.53183e-19	0.258807	0.425	0.347	3.88003e-15	ILC2	Msn
Rps27rt	2.54232e-19	0.641864	0.13	0.085	3.89611e-15	ILC2	Rps27rt
Atp5g1	2.64207e-19	0.399132	0.272	0.207	4.04897e-15	ILC2	Atp5g1
Dgcr6	2.83798e-19	1.09657	0.045	0.02	4.3492e-15	ILC2	Dgcr6
9130401M01Rik	2.87363e-19	0.756672	0.094	0.056	4.40384e-15	ILC2	9130401M01Rik
Dtx3l	3.06257e-19	0.962345	0.06	0.03	4.6934e-15	ILC2	Dtx3l
Gm1976	3.824e-19	1.4734	0.03	0.011	5.86027e-15	ILC2	Gm1976
Tnrc6a	4.51092e-19	0.673433	0.12	0.077	6.91298e-15	ILC2	Tnrc6a
St3gal2	4.58357e-19	1.3703	0.032	0.012	7.02431e-15	ILC2	St3gal2
Mgat5	4.61727e-19	0.417401	0.269	0.206	7.07596e-15	ILC2	Mgat5
Cox4i1	4.74043e-19	0.168132	0.818	0.758	7.26471e-15	ILC2	Cox4i1
Pigt	5.69815e-19	0.962252	0.061	0.032	8.73242e-15	ILC2	Pigt
Selenoh	6.85658e-19	0.647803	0.126	0.082	1.05077e-14	ILC2	Selenoh
Ctsz	7.97722e-19	0.571224	0.142	0.095	1.22251e-14	ILC2	Ctsz
Ehmt2	8.15928e-19	0.468915	0.213	0.156	1.25041e-14	ILC2	Ehmt2
Rnf213	8.33383e-19	0.595347	0.13	0.085	1.27716e-14	ILC2	Rnf213
Myl6	8.69768e-19	0.185518	0.755	0.69	1.33292e-14	ILC2	Myl6
Trmt1	1.8232e-18	0.813279	0.078	0.044	2.79405e-14	ILC2	Trmt1
Ifi27	1.89598e-18	0.454583	0.218	0.161	2.90558e-14	ILC2	Ifi27
Unc45a	2.414e-18	0.499813	0.189	0.136	3.69945e-14	ILC2	Unc45a
Atpif1	2.69749e-18	0.605345	0.129	0.085	4.13391e-14	ILC2	Atpif1
mt-Atp6	2.8499e-18	0.100417	0.998	0.998	4.36747e-14	ILC2	mt-Atp6
Park7	2.85006e-18	0.308226	0.344	0.275	4.36771e-14	ILC2	Park7
Lhfpl3	2.9396e-18	2.17075	0.013	0.003	4.50493e-14	ILC2	Lhfpl3
Ptma	4.11814e-18	0.119907	0.979	0.975	6.31106e-14	ILC2	Ptma
Nme2	4.41132e-18	0.38396	0.249	0.188	6.76035e-14	ILC2	Nme2
Hif1a	5.25101e-18	0.501085	0.2	0.146	8.04717e-14	ILC2	Hif1a
Itga2	5.77034e-18	1.42323	0.028	0.01	8.84305e-14	ILC2	Itga2
Sh3bgrl2	6.36206e-18	1.71368	0.022	0.007	9.74986e-14	ILC2	Sh3bgrl2
Trim27	7.32466e-18	0.689396	0.1	0.062	1.1225e-13	ILC2	Trim27
Cct3	7.94454e-18	0.417189	0.25	0.191	1.2175e-13	ILC2	Cct3
Rcc2	8.04247e-18	0.444689	0.211	0.156	1.23251e-13	ILC2	Rcc2
Rapsn	9.15999e-18	1.48318	0.021	0.007	1.40377e-13	ILC2	Rapsn
Aig1	9.21352e-18	0.760711	0.094	0.057	1.41197e-13	ILC2	Aig1
Csrp1	9.66167e-18	0.526198	0.173	0.123	1.48065e-13	ILC2	Csrp1
Tacc1	9.85298e-18	0.486423	0.191	0.139	1.50997e-13	ILC2	Tacc1
Ralgps2	1.02396e-17	0.739631	0.087	0.052	1.56922e-13	ILC2	Ralgps2
Plcg1	1.0675e-17	1.22832	0.038	0.017	1.63595e-13	ILC2	Plcg1
Cep63	1.4656e-17	0.734862	0.096	0.059	2.24603e-13	ILC2	Cep63
Egln2	1.61052e-17	0.79293	0.077	0.045	2.46813e-13	ILC2	Egln2
Cln6	2.46847e-17	1.04376	0.048	0.024	3.78293e-13	ILC2	Cln6
Galnt6	2.5885e-17	1.02104	0.048	0.024	3.96688e-13	ILC2	Galnt6
Rab11a	2.6151e-17	0.436387	0.249	0.191	4.00764e-13	ILC2	Rab11a
Gm2000	2.96259e-17	1.1714	0.042	0.02	4.54016e-13	ILC2	Gm2000
Mical3	2.99987e-17	2.01661	0.014	0.003	4.5973e-13	ILC2	Mical3
Fkbp11	3.29356e-17	2.165	0.015	0.004	5.04737e-13	ILC2	Fkbp11
Phldb3	3.36104e-17	1.38225	0.03	0.012	5.1508e-13	ILC2	Phldb3
P4ha2	3.3715e-17	1.09037	0.037	0.016	5.16682e-13	ILC2	P4ha2
Fermt3	3.45587e-17	0.305788	0.323	0.256	5.29612e-13	ILC2	Fermt3
Fam107b	3.46387e-17	0.235625	0.502	0.43	5.30839e-13	ILC2	Fam107b
Herc2	3.55813e-17	0.590162	0.132	0.088	5.45284e-13	ILC2	Herc2
Irgm1	3.6852e-17	0.863631	0.065	0.036	5.64756e-13	ILC2	Irgm1
mt-Nd1	3.68962e-17	0.110913	0.98	0.969	5.65435e-13	ILC2	mt-Nd1
Psmb9	4.43654e-17	0.373233	0.244	0.186	6.799e-13	ILC2	Psmb9
Hmgn2	4.89902e-17	0.63204	0.125	0.083	7.50774e-13	ILC2	Hmgn2
Gm41414	4.92837e-17	2.46562	0.011	0.002	7.55273e-13	ILC2	Gm41414
Foxd2os	5.21294e-17	1.82122	0.019	0.006	7.98883e-13	ILC2	Foxd2os
Ero1lb	5.79823e-17	0.936237	0.064	0.035	8.88578e-13	ILC2	Ero1lb
Arl14ep	6.20143e-17	1.13768	0.039	0.018	9.50369e-13	ILC2	Arl14ep
Itgb3bp	7.05967e-17	0.923046	0.059	0.031	1.08189e-12	ILC2	Itgb3bp
Tfdp1	7.54916e-17	1.20186	0.039	0.018	1.15691e-12	ILC2	Tfdp1
Sdhaf4	7.80591e-17	0.710825	0.08	0.047	1.19626e-12	ILC2	Sdhaf4
Acot11	8.42229e-17	1.31003	0.032	0.013	1.29072e-12	ILC2	Acot11
Zbtb12	8.46689e-17	1.07928	0.044	0.021	1.29755e-12	ILC2	Zbtb12
Tlk1	8.5423e-17	0.42269	0.211	0.157	1.30911e-12	ILC2	Tlk1
Eid2	8.77445e-17	2.77473	0.01	0.001	1.34469e-12	ILC2	Eid2
Tyms	1.00773e-16	1.42277	0.029	0.012	1.54435e-12	ILC2	Tyms
Arf3	1.04115e-16	0.550354	0.139	0.095	1.59556e-12	ILC2	Arf3
Noc2l	1.25743e-16	0.570892	0.123	0.082	1.92702e-12	ILC2	Noc2l
Cox10	1.28477e-16	0.482391	0.15	0.104	1.96891e-12	ILC2	Cox10
Psmb8	1.28992e-16	0.206353	0.51	0.434	1.9768e-12	ILC2	Psmb8
Cs	1.34254e-16	0.540948	0.153	0.108	2.05744e-12	ILC2	Cs
Nudcd3	1.56771e-16	0.468387	0.178	0.129	2.40252e-12	ILC2	Nudcd3
Selenof	1.61668e-16	0.23584	0.459	0.387	2.47756e-12	ILC2	Selenof
Rev3l	1.61695e-16	0.567481	0.132	0.09	2.47798e-12	ILC2	Rev3l
Actr8	1.69137e-16	0.762545	0.074	0.043	2.59203e-12	ILC2	Actr8
Pcbp2	1.80383e-16	0.17267	0.737	0.681	2.76437e-12	ILC2	Pcbp2
Vps13c	1.84409e-16	0.841764	0.058	0.031	2.82607e-12	ILC2	Vps13c
Tsc22d3	1.91772e-16	0.132096	0.463	0.383	2.93891e-12	ILC2	Tsc22d3
Wdr60	1.92917e-16	2.28154	0.013	0.003	2.95645e-12	ILC2	Wdr60
Oas3	2.05477e-16	1.68225	0.02	0.006	3.14894e-12	ILC2	Oas3
Sdf4	2.15778e-16	0.254696	0.417	0.349	3.3068e-12	ILC2	Sdf4
Pdia3	2.162e-16	0.17024	0.695	0.624	3.31327e-12	ILC2	Pdia3
Nup98	2.26216e-16	0.374353	0.263	0.205	3.46676e-12	ILC2	Nup98
Tmem170b	2.271e-16	1.00137	0.049	0.025	3.48031e-12	ILC2	Tmem170b
Plscr1	2.38359e-16	0.211212	0.414	0.342	3.65285e-12	ILC2	Plscr1
Dusp11	2.38746e-16	0.369985	0.234	0.178	3.65878e-12	ILC2	Dusp11
Bcap29	2.95571e-16	0.647092	0.107	0.069	4.52963e-12	ILC2	Bcap29
Lpcat4	3.36725e-16	0.822156	0.08	0.048	5.16032e-12	ILC2	Lpcat4
Zdhhc18	3.76792e-16	0.426218	0.231	0.177	5.77434e-12	ILC2	Zdhhc18
Adpgk	4.10518e-16	0.640904	0.1	0.064	6.29119e-12	ILC2	Adpgk
Rusc1	4.30238e-16	0.668109	0.105	0.068	6.59339e-12	ILC2	Rusc1
Sesn1	4.36057e-16	0.58096	0.137	0.094	6.68257e-12	ILC2	Sesn1
Myo6	4.78449e-16	1.0638	0.059	0.032	7.33222e-12	ILC2	Myo6
Galnt12	4.789e-16	0.636758	0.123	0.083	7.33915e-12	ILC2	Galnt12
B4galnt2	5.20011e-16	2.12196	0.014	0.004	7.96917e-12	ILC2	B4galnt2
Kmt2c	6.01736e-16	0.382702	0.278	0.221	9.22161e-12	ILC2	Kmt2c
Mrpl23	6.7054e-16	0.3856	0.232	0.178	1.0276e-11	ILC2	Mrpl23
Sfmbt1	6.77628e-16	0.893236	0.058	0.031	1.03847e-11	ILC2	Sfmbt1
Neu3	7.53075e-16	2.41982	0.01	0.002	1.15409e-11	ILC2	Neu3
Ass1	7.9059e-16	1.47024	0.024	0.009	1.21158e-11	ILC2	Ass1
Txn2	8.03055e-16	0.446829	0.195	0.145	1.23068e-11	ILC2	Txn2
Pmm2	8.17368e-16	0.723927	0.086	0.053	1.25262e-11	ILC2	Pmm2
Trmt112	8.34007e-16	0.247735	0.412	0.345	1.27812e-11	ILC2	Trmt112
Gimap6	8.66254e-16	0.19517	0.593	0.522	1.32753e-11	ILC2	Gimap6
Nsmf	8.92736e-16	1.24004	0.032	0.014	1.36812e-11	ILC2	Nsmf
Supt3	9.09185e-16	0.948841	0.05	0.026	1.39333e-11	ILC2	Supt3
Morrbid	9.23109e-16	1.34462	0.026	0.01	1.41466e-11	ILC2	Morrbid
Polr2j	9.65272e-16	0.647103	0.092	0.057	1.47928e-11	ILC2	Polr2j
Iigp1	1.01603e-15	1.19676	0.034	0.015	1.55706e-11	ILC2	Iigp1
Nt5c	1.04156e-15	0.391316	0.181	0.131	1.59619e-11	ILC2	Nt5c
Cenpv	1.17371e-15	1.44665	0.024	0.009	1.79871e-11	ILC2	Cenpv
Slc3a2	1.2485e-15	0.180514	0.681	0.613	1.91332e-11	ILC2	Slc3a2
Man2b1	1.4346e-15	0.625508	0.103	0.067	2.19853e-11	ILC2	Man2b1
Slc25a25	1.56833e-15	0.790984	0.065	0.037	2.40347e-11	ILC2	Slc25a25
Sys1	1.60507e-15	0.441315	0.193	0.143	2.45977e-11	ILC2	Sys1
Lman1	1.70045e-15	0.469467	0.156	0.111	2.60594e-11	ILC2	Lman1
Cct2	1.83969e-15	0.306861	0.338	0.275	2.81932e-11	ILC2	Cct2
Hmgb3	1.89848e-15	1.65658	0.018	0.006	2.90942e-11	ILC2	Hmgb3
Blmh	2.09506e-15	0.706085	0.081	0.049	3.21068e-11	ILC2	Blmh
Mylip	2.22953e-15	0.790325	0.086	0.054	3.41675e-11	ILC2	Mylip
Hdx	2.23267e-15	2.59652	0.01	0.002	3.42156e-11	ILC2	Hdx
Ptprcap	2.30523e-15	0.20038	0.512	0.439	3.53277e-11	ILC2	Ptprcap
6530402F18Rik	2.6579e-15	1.17475	0.033	0.014	4.07324e-11	ILC2	6530402F18Rik
Rpn2	2.9451e-15	0.278134	0.316	0.254	4.51336e-11	ILC2	Rpn2
Hectd4	3.01521e-15	0.731315	0.073	0.043	4.6208e-11	ILC2	Hectd4
Oip5os1	3.02555e-15	0.490492	0.173	0.127	4.63665e-11	ILC2	Oip5os1
Cfdp1	3.06218e-15	0.413553	0.183	0.135	4.69279e-11	ILC2	Cfdp1
Anapc16	3.7627e-15	0.562341	0.133	0.092	5.76633e-11	ILC2	Anapc16
Thra	3.95477e-15	0.641906	0.091	0.057	6.06068e-11	ILC2	Thra
Fas	4.07061e-15	1.28102	0.024	0.009	6.23821e-11	ILC2	Fas
Slc4a7	4.11086e-15	0.544493	0.123	0.084	6.29989e-11	ILC2	Slc4a7
Atmin	4.46922e-15	0.644895	0.093	0.059	6.84908e-11	ILC2	Atmin
Dip2c	4.82625e-15	1.97757	0.015	0.004	7.39622e-11	ILC2	Dip2c
G430095P16Rik	5.10801e-15	2.02012	0.013	0.003	7.82803e-11	ILC2	G430095P16Rik
Fkbp5	5.17743e-15	0.447591	0.183	0.136	7.93441e-11	ILC2	Fkbp5
Prpf8	5.192e-15	0.43204	0.174	0.127	7.95674e-11	ILC2	Prpf8
Psmg4	5.20819e-15	0.505883	0.13	0.089	7.98155e-11	ILC2	Psmg4
Grik5	5.8985e-15	1.33204	0.028	0.011	9.03945e-11	ILC2	Grik5
Myc	6.75907e-15	0.610496	0.064	0.037	1.03583e-10	ILC2	Myc
Calcrl	7.14156e-15	1.44254	0.023	0.008	1.09444e-10	ILC2	Calcrl
Jmy	7.73475e-15	0.400538	0.253	0.2	1.18535e-10	ILC2	Jmy
Plgrkt	7.95108e-15	0.338715	0.259	0.203	1.2185e-10	ILC2	Plgrkt
Glcci1	8.51888e-15	1.0695	0.044	0.022	1.30552e-10	ILC2	Glcci1
Ide	8.57583e-15	0.445358	0.179	0.132	1.31425e-10	ILC2	Ide
Pik3r5	8.93979e-15	0.562424	0.096	0.062	1.37002e-10	ILC2	Pik3r5
Adrb2	9.58536e-15	0.645872	0.109	0.072	1.46896e-10	ILC2	Adrb2
Anapc5	9.60816e-15	0.486606	0.142	0.1	1.47245e-10	ILC2	Anapc5
Metrnl	9.64645e-15	0.678728	0.081	0.05	1.47832e-10	ILC2	Metrnl
Ap2s1	1.00273e-14	0.479128	0.17	0.125	1.53668e-10	ILC2	Ap2s1
Patz1	1.02239e-14	1.14841	0.036	0.017	1.56682e-10	ILC2	Patz1
Riok1	1.27241e-14	0.33035	0.218	0.167	1.94996e-10	ILC2	Riok1
Pts	1.40391e-14	0.555705	0.115	0.078	2.15149e-10	ILC2	Pts
Plcb2	1.45148e-14	0.599802	0.098	0.064	2.22439e-10	ILC2	Plcb2
Pus7	1.50596e-14	1.39329	0.023	0.009	2.30789e-10	ILC2	Pus7
Ldhd	1.5292e-14	1.32488	0.026	0.01	2.3435e-10	ILC2	Ldhd
Mycbp2	1.59669e-14	0.273369	0.355	0.293	2.44692e-10	ILC2	Mycbp2
Adck5	1.70616e-14	1.07113	0.04	0.02	2.6147e-10	ILC2	Adck5
Eif4g2	1.72087e-14	0.179354	0.718	0.66	2.63724e-10	ILC2	Eif4g2
Irf9	1.92556e-14	0.663498	0.08	0.049	2.95092e-10	ILC2	Irf9
Tmem231	2.05887e-14	1.85401	0.013	0.003	3.15521e-10	ILC2	Tmem231
Ndufc2	2.17079e-14	0.339999	0.253	0.199	3.32673e-10	ILC2	Ndufc2
Naip2	2.39083e-14	1.2537	0.025	0.01	3.66395e-10	ILC2	Naip2
Aggf1	2.59712e-14	0.553171	0.107	0.071	3.98009e-10	ILC2	Aggf1
Gramd1c	2.72893e-14	1.33066	0.025	0.01	4.18209e-10	ILC2	Gramd1c
Mrps16	2.90358e-14	0.509804	0.137	0.097	4.44973e-10	ILC2	Mrps16
Snhg6	3.0731e-14	0.49531	0.16	0.117	4.70953e-10	ILC2	Snhg6
Tef	3.08071e-14	0.8702	0.051	0.027	4.72119e-10	ILC2	Tef
Mindy1	3.40295e-14	1.11243	0.036	0.017	5.21503e-10	ILC2	Mindy1
4930503L19Rik	4.25988e-14	0.386397	0.332	0.279	6.52827e-10	ILC2	4930503L19Rik
Phb2	4.61143e-14	0.34025	0.242	0.189	7.06702e-10	ILC2	Phb2
Tspan31	4.77789e-14	0.494612	0.124	0.086	7.32211e-10	ILC2	Tspan31
Pcmt1	5.8134e-14	0.391775	0.192	0.145	8.90903e-10	ILC2	Pcmt1
Exosc5	6.16783e-14	0.57823	0.106	0.071	9.4522e-10	ILC2	Exosc5
Eif2a	6.21851e-14	0.525682	0.129	0.09	9.52987e-10	ILC2	Eif2a
Lpcat1	6.54645e-14	0.942235	0.042	0.021	1.00324e-09	ILC2	Lpcat1
Lyn	6.67874e-14	0.260805	0.342	0.283	1.02352e-09	ILC2	Lyn
Zfp53	6.78366e-14	0.798421	0.065	0.039	1.0396e-09	ILC2	Zfp53
Atp1b1	6.85618e-14	1.48908	0.02	0.007	1.05071e-09	ILC2	Atp1b1
Pik3c2a	7.06626e-14	0.984655	0.04	0.02	1.0829e-09	ILC2	Pik3c2a
Nop9	7.11382e-14	0.786592	0.059	0.034	1.09019e-09	ILC2	Nop9
Nono	7.11563e-14	0.318286	0.291	0.236	1.09047e-09	ILC2	Nono
Tfpi	7.44298e-14	1.20542	0.029	0.012	1.14064e-09	ILC2	Tfpi
Kars	7.51484e-14	0.591248	0.116	0.08	1.15165e-09	ILC2	Kars
Tut4	8.13421e-14	0.228124	0.497	0.434	1.24657e-09	ILC2	Tut4
Cers2	8.23764e-14	0.436857	0.168	0.124	1.26242e-09	ILC2	Cers2
Kalrn	9.38539e-14	0.892356	0.048	0.026	1.43831e-09	ILC2	Kalrn
Gpcpd1	9.87726e-14	0.47148	0.172	0.128	1.51369e-09	ILC2	Gpcpd1
Fbxo33	1.0311e-13	0.530718	0.131	0.093	1.58016e-09	ILC2	Fbxo33
Arpc1a	1.09351e-13	0.404843	0.174	0.129	1.67581e-09	ILC2	Arpc1a
Rexo5	1.11629e-13	0.958728	0.043	0.022	1.71071e-09	ILC2	Rexo5
Zfp131	1.1856e-13	0.396999	0.187	0.141	1.81693e-09	ILC2	Zfp131
Sesn3	1.23349e-13	0.520183	0.125	0.088	1.89032e-09	ILC2	Sesn3
Gm20559	1.33237e-13	0.908326	0.045	0.024	2.04186e-09	ILC2	Gm20559
2510039O18Rik	1.34554e-13	0.689363	0.087	0.057	2.06205e-09	ILC2	2510039O18Rik
Taf1c	1.34943e-13	0.924404	0.042	0.022	2.068e-09	ILC2	Taf1c
A4galt	1.40854e-13	1.91363	0.014	0.004	2.15859e-09	ILC2	A4galt
Cox5b	1.43635e-13	0.231142	0.411	0.349	2.2012e-09	ILC2	Cox5b
Dnajc9	1.462e-13	0.579587	0.096	0.063	2.24052e-09	ILC2	Dnajc9
St5	1.46468e-13	1.59454	0.015	0.005	2.24463e-09	ILC2	St5
Kat2b	1.56517e-13	0.671204	0.084	0.053	2.39863e-09	ILC2	Kat2b
R3hdm1	1.84839e-13	0.471749	0.138	0.099	2.83266e-09	ILC2	R3hdm1
Atp2a2	1.90312e-13	0.443349	0.178	0.134	2.91653e-09	ILC2	Atp2a2
Skil	1.99538e-13	0.24306	0.557	0.506	3.05792e-09	ILC2	Skil
Ppia	2.09316e-13	0.111979	0.992	0.988	3.20776e-09	ILC2	Ppia
Ubap2l	2.29691e-13	0.337139	0.27	0.217	3.52002e-09	ILC2	Ubap2l
Gm14164	2.3653e-13	1.2244	0.026	0.011	3.62482e-09	ILC2	Gm14164
Zfp992	2.38243e-13	1.13051	0.033	0.016	3.65107e-09	ILC2	Zfp992
Cdk8	2.54568e-13	0.625737	0.091	0.059	3.90126e-09	ILC2	Cdk8
Psd3	2.56668e-13	0.799414	0.055	0.031	3.93344e-09	ILC2	Psd3
Cd3g	2.6347e-13	0.771502	0.082	0.053	4.03767e-09	ILC2	Cd3g
Foxn3	2.82245e-13	0.393486	0.181	0.136	4.32541e-09	ILC2	Foxn3
Cast	2.99755e-13	0.300819	0.286	0.232	4.59374e-09	ILC2	Cast
Epb41l1	3.62628e-13	1.21276	0.028	0.012	5.55727e-09	ILC2	Epb41l1
Mfsd10	3.71842e-13	0.531604	0.123	0.086	5.69848e-09	ILC2	Mfsd10
Cotl1	3.80779e-13	0.209027	0.537	0.477	5.83543e-09	ILC2	Cotl1
Kxd1	3.94274e-13	0.460245	0.148	0.108	6.04225e-09	ILC2	Kxd1
E230032D23Rik	4.14767e-13	1.74097	0.014	0.004	6.3563e-09	ILC2	E230032D23Rik
Il2rg	4.19977e-13	0.162046	0.771	0.725	6.43615e-09	ILC2	Il2rg
Cacna1a	4.23888e-13	1.07016	0.031	0.015	6.49609e-09	ILC2	Cacna1a
Prkacb	4.55674e-13	0.357258	0.223	0.174	6.98321e-09	ILC2	Prkacb
Phb	4.5879e-13	0.63645	0.083	0.053	7.03096e-09	ILC2	Phb
Nceh1	4.66045e-13	0.688951	0.069	0.042	7.14214e-09	ILC2	Nceh1
Rasal3	4.74813e-13	0.338906	0.232	0.183	7.27652e-09	ILC2	Rasal3
Dus2	4.78519e-13	0.751666	0.074	0.046	7.3333e-09	ILC2	Dus2
Ifnar2	5.02697e-13	0.498361	0.147	0.108	7.70383e-09	ILC2	Ifnar2
Plcb1	5.11072e-13	1.44083	0.021	0.008	7.83218e-09	ILC2	Plcb1
Il17a	5.32068e-13	2.30097	0.049	0.027	8.15395e-09	ILC2	Il17a
Mrpl46	6.58721e-13	0.675584	0.074	0.046	1.00949e-08	ILC2	Mrpl46
Cd6	7.1286e-13	0.939855	0.034	0.017	1.09246e-08	ILC2	Cd6
Etfb	7.19504e-13	0.38122	0.202	0.156	1.10264e-08	ILC2	Etfb
Specc1l	7.33615e-13	0.531567	0.099	0.066	1.12427e-08	ILC2	Specc1l
Fabp5	7.47512e-13	1.3253	0.026	0.011	1.14556e-08	ILC2	Fabp5
Creg1	7.78169e-13	0.375705	0.197	0.152	1.19254e-08	ILC2	Creg1
Acsl3	7.98978e-13	1.64072	0.013	0.004	1.22443e-08	ILC2	Acsl3
Tmem208	9.5815e-13	0.601002	0.104	0.071	1.46836e-08	ILC2	Tmem208
Nob1	9.76933e-13	0.723467	0.062	0.037	1.49715e-08	ILC2	Nob1
Susd6	9.86975e-13	0.381795	0.232	0.184	1.51254e-08	ILC2	Susd6
B230118H07Rik	1.08596e-12	0.918168	0.042	0.022	1.66424e-08	ILC2	B230118H07Rik
Gm31718	1.2389e-12	1.33173	0.022	0.009	1.89862e-08	ILC2	Gm31718
Gm32401	1.3259e-12	1.5773	0.016	0.005	2.03195e-08	ILC2	Gm32401
Sh2b1	1.53961e-12	0.559139	0.118	0.083	2.35945e-08	ILC2	Sh2b1
Emc7	1.63449e-12	0.307331	0.239	0.189	2.50486e-08	ILC2	Emc7
Prcp	1.86565e-12	0.47367	0.147	0.108	2.8591e-08	ILC2	Prcp
Nudt21	1.96739e-12	0.307726	0.24	0.191	3.01503e-08	ILC2	Nudt21
Dap3	1.9744e-12	0.460216	0.119	0.083	3.02576e-08	ILC2	Dap3
Epm2aip1	2.24272e-12	0.836707	0.06	0.036	3.43697e-08	ILC2	Epm2aip1
Pard6g	2.27788e-12	1.55357	0.014	0.004	3.49085e-08	ILC2	Pard6g
Cmpk1	2.78131e-12	0.379889	0.202	0.158	4.26236e-08	ILC2	Cmpk1
Snrpd3	2.83481e-12	0.254597	0.316	0.261	4.34434e-08	ILC2	Snrpd3
5730420D15Rik	2.90813e-12	1.97176	0.011	0.003	4.45671e-08	ILC2	5730420D15Rik
Arhgap27os3	2.93056e-12	2.05127	0.011	0.003	4.49108e-08	ILC2	Arhgap27os3
Nipa1	2.95501e-12	2.14391	0.01	0.002	4.52856e-08	ILC2	Nipa1
Gm34006	3.1039e-12	1.83064	0.012	0.003	4.75673e-08	ILC2	Gm34006
Eef1aknmt	3.12036e-12	1.22908	0.023	0.01	4.78195e-08	ILC2	Eef1aknmt
Ppid	3.16357e-12	0.653741	0.074	0.047	4.84817e-08	ILC2	Ppid
4933406I18Rik	3.22011e-12	1.32706	0.021	0.009	4.93482e-08	ILC2	4933406I18Rik
Eif2s3x	3.31049e-12	0.362894	0.214	0.168	5.07333e-08	ILC2	Eif2s3x
Fnip1	3.34141e-12	0.486893	0.126	0.09	5.12072e-08	ILC2	Fnip1
Orc4	3.3938e-12	0.557013	0.098	0.067	5.201e-08	ILC2	Orc4
Macf1	3.47563e-12	0.180845	0.478	0.415	5.32641e-08	ILC2	Macf1
Nras	3.51901e-12	0.579685	0.087	0.058	5.39288e-08	ILC2	Nras
Utp14a	3.60477e-12	0.535889	0.106	0.074	5.52431e-08	ILC2	Utp14a
Lyrm4	4.14891e-12	1.05787	0.031	0.015	6.3582e-08	ILC2	Lyrm4
Pwwp3a	4.17943e-12	0.685806	0.073	0.046	6.40497e-08	ILC2	Pwwp3a
Tomm70a	4.29306e-12	0.435939	0.142	0.104	6.57912e-08	ILC2	Tomm70a
Trim25	4.31425e-12	0.919564	0.038	0.02	6.61159e-08	ILC2	Trim25
Rsbn1l	4.62047e-12	0.274654	0.314	0.261	7.08087e-08	ILC2	Rsbn1l
Tnfrsf22	4.63507e-12	1.64072	0.013	0.004	7.10325e-08	ILC2	Tnfrsf22
Slc2a1	5.21593e-12	0.669476	0.074	0.047	7.99341e-08	ILC2	Slc2a1
Atp8b4	5.37829e-12	1.50849	0.018	0.007	8.24223e-08	ILC2	Atp8b4
Zfp1	5.49826e-12	0.93321	0.033	0.016	8.42609e-08	ILC2	Zfp1
Abce1	5.7054e-12	0.550582	0.09	0.06	8.74353e-08	ILC2	Abce1
Ipo4	5.72854e-12	1.0939	0.025	0.011	8.77899e-08	ILC2	Ipo4
Dcun1d1	5.80617e-12	0.533329	0.109	0.076	8.89796e-08	ILC2	Dcun1d1
Tfpt	6.62842e-12	0.893053	0.04	0.022	1.01581e-07	ILC2	Tfpt
Plekhj1	6.83242e-12	0.328618	0.191	0.147	1.04707e-07	ILC2	Plekhj1
Nek7	6.83583e-12	0.345363	0.244	0.197	1.04759e-07	ILC2	Nek7
Mir142hg	7.09512e-12	0.191722	0.487	0.428	1.08733e-07	ILC2	Mir142hg
Bmpr1a	7.84088e-12	1.72567	0.012	0.003	1.20161e-07	ILC2	Bmpr1a
Arhgdib	7.92195e-12	0.143189	0.631	0.568	1.21404e-07	ILC2	Arhgdib
Irak4	7.95591e-12	0.742474	0.062	0.038	1.21924e-07	ILC2	Irak4
Dbi	8.08769e-12	0.491994	0.141	0.104	1.23944e-07	ILC2	Dbi
Mfsd1	8.82233e-12	0.649426	0.065	0.04	1.35202e-07	ILC2	Mfsd1
Sik1	8.89463e-12	0.213137	0.434	0.379	1.3631e-07	ILC2	Sik1
Gfer	9.26136e-12	0.792982	0.051	0.029	1.4193e-07	ILC2	Gfer
Hnrnpa1	9.48986e-12	0.162287	0.575	0.518	1.45432e-07	ILC2	Hnrnpa1
Xaf1	9.97966e-12	0.608984	0.058	0.035	1.52938e-07	ILC2	Xaf1
Anxa11	1.09801e-11	0.419047	0.165	0.126	1.68269e-07	ILC2	Anxa11
Mrpl32	1.18395e-11	0.32427	0.201	0.157	1.81441e-07	ILC2	Mrpl32
Fbxl6	1.2965e-11	0.608858	0.076	0.05	1.98689e-07	ILC2	Fbxl6
Kdelr1	1.30513e-11	0.35721	0.198	0.155	2.00011e-07	ILC2	Kdelr1
Zcwpw1	1.48827e-11	1.04128	0.031	0.015	2.28077e-07	ILC2	Zcwpw1
Ddx21	1.54322e-11	0.279036	0.278	0.227	2.36498e-07	ILC2	Ddx21
Tmem160	1.56091e-11	0.309258	0.21	0.165	2.3921e-07	ILC2	Tmem160
Tmx3	1.61553e-11	0.493089	0.116	0.083	2.47579e-07	ILC2	Tmx3
Nufip2	1.62488e-11	0.340982	0.187	0.145	2.49013e-07	ILC2	Nufip2
H2-T24	1.66169e-11	1.864	0.011	0.003	2.54655e-07	ILC2	H2-T24
Ddias	1.70247e-11	1.65755	0.014	0.004	2.60904e-07	ILC2	Ddias
Syngr2	1.70342e-11	0.292522	0.291	0.241	2.61049e-07	ILC2	Syngr2
Pgls	1.74658e-11	0.337508	0.194	0.151	2.67663e-07	ILC2	Pgls
Chchd3	1.83516e-11	0.368465	0.188	0.146	2.81239e-07	ILC2	Chchd3
Son	2.09928e-11	0.170999	0.519	0.459	3.21714e-07	ILC2	Son
Mrps17	2.1903e-11	0.503174	0.104	0.072	3.35663e-07	ILC2	Mrps17
Fam162a	2.25045e-11	0.535715	0.119	0.086	3.44881e-07	ILC2	Fam162a
B3galnt2	2.36755e-11	0.808828	0.043	0.024	3.62826e-07	ILC2	B3galnt2
Zfp36	2.45854e-11	0.24473	0.668	0.627	3.76771e-07	ILC2	Zfp36
Fhit	2.48436e-11	0.821881	0.037	0.02	3.80728e-07	ILC2	Fhit
Brk1	2.49054e-11	0.241541	0.328	0.275	3.81676e-07	ILC2	Brk1
Ino80d	2.61949e-11	0.471527	0.122	0.088	4.01438e-07	ILC2	Ino80d
Ctnna1	2.6645e-11	0.370859	0.167	0.127	4.08334e-07	ILC2	Ctnna1
Psmd7	2.74987e-11	0.493903	0.107	0.075	4.21418e-07	ILC2	Psmd7
Zhx1	2.91343e-11	0.547638	0.098	0.068	4.46483e-07	ILC2	Zhx1
Gltp	3.16052e-11	0.44527	0.131	0.096	4.84349e-07	ILC2	Gltp
Dctpp1	3.19698e-11	0.788426	0.044	0.025	4.89936e-07	ILC2	Dctpp1
Mlxip	3.35255e-11	0.390068	0.153	0.115	5.13778e-07	ILC2	Mlxip
Dtd1	3.37202e-11	0.495272	0.111	0.079	5.16762e-07	ILC2	Dtd1
Gfpt1	3.40058e-11	0.697859	0.065	0.041	5.21139e-07	ILC2	Gfpt1
Slc39a13	3.96627e-11	1.29815	0.02	0.008	6.07831e-07	ILC2	Slc39a13
Itgb1	4.10001e-11	0.470962	0.114	0.081	6.28327e-07	ILC2	Itgb1
Cox7b	4.36874e-11	0.224568	0.367	0.313	6.6951e-07	ILC2	Cox7b
G3bp2	4.55305e-11	0.279142	0.278	0.23	6.97755e-07	ILC2	G3bp2
Sec61b	4.70538e-11	0.164887	0.47	0.41	7.21099e-07	ILC2	Sec61b
Traf3ip2	5.41557e-11	0.36179	0.166	0.127	8.29936e-07	ILC2	Traf3ip2
Smg9	5.43782e-11	0.787034	0.051	0.03	8.33347e-07	ILC2	Smg9
Btaf1	5.51651e-11	0.436515	0.13	0.096	8.45404e-07	ILC2	Btaf1
Clic1	5.7246e-11	0.134334	0.556	0.49	8.77295e-07	ILC2	Clic1
Gimap1	5.79009e-11	0.332738	0.227	0.183	8.87332e-07	ILC2	Gimap1
Ncoa1	6.57736e-11	0.481542	0.109	0.078	1.00798e-06	ILC2	Ncoa1
Relch	6.637e-11	0.641407	0.079	0.053	1.01712e-06	ILC2	Relch
Atp5f1	6.95498e-11	0.19676	0.376	0.32	1.06585e-06	ILC2	Atp5f1
Erc1	7.16548e-11	1.22511	0.02	0.009	1.09811e-06	ILC2	Erc1
Idh2	8.12431e-11	0.7937	0.041	0.023	1.24505e-06	ILC2	Idh2
Sp100	8.99499e-11	0.301503	0.223	0.179	1.37848e-06	ILC2	Sp100
Armc3	9.40388e-11	1.60918	0.012	0.004	1.44114e-06	ILC2	Armc3
Ier3ip1	9.49649e-11	0.290061	0.213	0.169	1.45534e-06	ILC2	Ier3ip1
Calhm2	9.70003e-11	0.839685	0.041	0.023	1.48653e-06	ILC2	Calhm2
Tcp1	1.06038e-10	0.297099	0.249	0.203	1.62503e-06	ILC2	Tcp1
Bloc1s1	1.06369e-10	0.647939	0.058	0.036	1.63011e-06	ILC2	Bloc1s1
Was	1.10431e-10	0.351514	0.185	0.145	1.69235e-06	ILC2	Was
Nsd3	1.10756e-10	0.254763	0.374	0.322	1.69734e-06	ILC2	Nsd3
Wdr86	1.12089e-10	0.99289	0.028	0.014	1.71776e-06	ILC2	Wdr86
Per2	1.21151e-10	1.42044	0.016	0.006	1.85663e-06	ILC2	Per2
Diaph3	1.21306e-10	1.31756	0.02	0.008	1.85901e-06	ILC2	Diaph3
Sh3d19	1.32593e-10	1.21487	0.019	0.008	2.03199e-06	ILC2	Sh3d19
Rps6ka5	1.35641e-10	1.06592	0.027	0.013	2.0787e-06	ILC2	Rps6ka5
Eif3l	1.38519e-10	0.382059	0.156	0.119	2.1228e-06	ILC2	Eif3l
Dok2	1.47487e-10	0.413692	0.127	0.093	2.26024e-06	ILC2	Dok2
Nup210	1.48443e-10	0.457277	0.114	0.082	2.27489e-06	ILC2	Nup210
Gtf2b	1.5224e-10	0.240827	0.302	0.253	2.33308e-06	ILC2	Gtf2b
Zfp622	1.58622e-10	0.338743	0.187	0.147	2.43089e-06	ILC2	Zfp622
Dis3	1.62671e-10	0.982748	0.034	0.018	2.49294e-06	ILC2	Dis3
Tsen15	1.64216e-10	0.692318	0.059	0.037	2.51661e-06	ILC2	Tsen15
Fam104a	1.64781e-10	0.411552	0.152	0.115	2.52527e-06	ILC2	Fam104a
Gvin1	1.69333e-10	0.805105	0.05	0.03	2.59503e-06	ILC2	Gvin1
Lrrk1	1.73778e-10	1.03684	0.032	0.016	2.66315e-06	ILC2	Lrrk1
mt-Atp8	1.79912e-10	0.289174	0.26	0.214	2.75715e-06	ILC2	mt-Atp8
Castor2	1.87625e-10	1.59865	0.013	0.004	2.87536e-06	ILC2	Castor2
Dhcr24	1.87851e-10	1.13525	0.024	0.011	2.87881e-06	ILC2	Dhcr24
Tgtp2	2.04539e-10	0.716774	0.059	0.037	3.13456e-06	ILC2	Tgtp2
Trappc5	2.10981e-10	0.498016	0.09	0.062	3.23329e-06	ILC2	Trappc5
C1qbp	2.16605e-10	0.422024	0.151	0.115	3.31947e-06	ILC2	C1qbp
Galnt10	2.294e-10	0.766538	0.045	0.026	3.51556e-06	ILC2	Galnt10
Eef1akmt4	2.2959e-10	1.41606	0.017	0.007	3.51847e-06	ILC2	Eef1akmt4
Gbp5	2.62971e-10	0.994766	0.029	0.015	4.03003e-06	ILC2	Gbp5
Hspe1-rs1	2.65521e-10	1.30153	0.018	0.007	4.06911e-06	ILC2	Hspe1-rs1
Myadm	2.67252e-10	0.87641	0.041	0.024	4.09564e-06	ILC2	Myadm
Magohb	2.73915e-10	0.535373	0.077	0.051	4.19774e-06	ILC2	Magohb
Axl	2.8249e-10	1.40026	0.016	0.006	4.32916e-06	ILC2	Axl
Atp13a1	2.98941e-10	0.63231	0.061	0.039	4.58127e-06	ILC2	Atp13a1
mt-Nd4l	3.05464e-10	0.198448	0.33	0.277	4.68123e-06	ILC2	mt-Nd4l
Pcnx4	3.32053e-10	0.930636	0.033	0.017	5.08871e-06	ILC2	Pcnx4
A630001G21Rik	3.38364e-10	0.775494	0.046	0.027	5.18542e-06	ILC2	A630001G21Rik
Sp3os	3.4345e-10	0.839052	0.036	0.02	5.26337e-06	ILC2	Sp3os
Vmp1	3.7126e-10	0.30557	0.202	0.16	5.68955e-06	ILC2	Vmp1
Kmt2d	3.795e-10	0.432675	0.133	0.1	5.81584e-06	ILC2	Kmt2d
Ahcyl2	3.8758e-10	0.308581	0.246	0.203	5.93966e-06	ILC2	Ahcyl2
Vcp	3.87798e-10	0.252197	0.303	0.255	5.943e-06	ILC2	Vcp
Mfsd14a	3.93057e-10	0.45893	0.103	0.073	6.0236e-06	ILC2	Mfsd14a
Zfp655	3.93564e-10	0.496321	0.091	0.063	6.03137e-06	ILC2	Zfp655
Ube2l3	3.94884e-10	0.214037	0.38	0.329	6.05159e-06	ILC2	Ube2l3
Tmppe	4.10984e-10	1.87222	0.01	0.003	6.29833e-06	ILC2	Tmppe
Mbd5	4.28421e-10	0.560054	0.078	0.052	6.56555e-06	ILC2	Mbd5
Sfn	4.38235e-10	0.805105	0.039	0.022	6.71595e-06	ILC2	Sfn
Nenf	4.52423e-10	0.941053	0.03	0.015	6.93338e-06	ILC2	Nenf
Atxn1	4.61618e-10	0.352845	0.152	0.117	7.0743e-06	ILC2	Atxn1
Cited2	4.61993e-10	0.248307	0.277	0.232	7.08004e-06	ILC2	Cited2
Ppp3r1	4.77118e-10	0.374297	0.143	0.108	7.31183e-06	ILC2	Ppp3r1
Fam210a	5.46769e-10	0.83494	0.037	0.02	8.37923e-06	ILC2	Fam210a
Yeats2	5.54738e-10	0.723641	0.051	0.031	8.50136e-06	ILC2	Yeats2
Sdhb	5.79011e-10	0.292596	0.207	0.167	8.87334e-06	ILC2	Sdhb
Fam20b	6.11696e-10	0.723128	0.052	0.032	9.37424e-06	ILC2	Fam20b
BC048403	6.14431e-10	0.985677	0.029	0.015	9.41615e-06	ILC2	BC048403
Uqcc3	6.34162e-10	0.497458	0.097	0.069	9.71853e-06	ILC2	Uqcc3
Tap2	6.62502e-10	0.236297	0.279	0.232	1.01528e-05	ILC2	Tap2
Kcnk5	7.24161e-10	0.783941	0.043	0.025	1.10978e-05	ILC2	Kcnk5
Gm41804	7.62216e-10	1.29053	0.018	0.008	1.1681e-05	ILC2	Gm41804
Cmtm3	7.68992e-10	1.29815	0.017	0.007	1.17848e-05	ILC2	Cmtm3
Clstn1	8.08779e-10	0.789164	0.04	0.023	1.23945e-05	ILC2	Clstn1
Gm20400	8.12634e-10	0.417842	0.107	0.078	1.24536e-05	ILC2	Gm20400
Gm4070	8.15113e-10	0.602013	0.074	0.05	1.24916e-05	ILC2	Gm4070
Chd9	8.21071e-10	0.288855	0.231	0.189	1.25829e-05	ILC2	Chd9
Snrnp25	9.63417e-10	0.640498	0.063	0.041	1.47644e-05	ILC2	Snrnp25
Klhl15	9.91105e-10	0.93474	0.029	0.015	1.51887e-05	ILC2	Klhl15
Tomm7	1.07557e-09	0.175055	0.422	0.369	1.6483e-05	ILC2	Tomm7
Scml4	1.21569e-09	0.708981	0.053	0.033	1.86305e-05	ILC2	Scml4
Flcn	1.24203e-09	0.763721	0.041	0.024	1.9034e-05	ILC2	Flcn
Isca1	1.24356e-09	0.350031	0.172	0.135	1.90576e-05	ILC2	Isca1
Cbx6	1.30242e-09	0.629092	0.061	0.04	1.99596e-05	ILC2	Cbx6
Slc6a13	1.32191e-09	0.351875	0.125	0.093	2.02583e-05	ILC2	Slc6a13
Zfp991	1.40119e-09	0.999608	0.025	0.012	2.14732e-05	ILC2	Zfp991
Lpcat3	1.47824e-09	0.755549	0.041	0.024	2.2654e-05	ILC2	Lpcat3
Cyp2d22	1.52228e-09	1.22014	0.019	0.008	2.33289e-05	ILC2	Cyp2d22
Srp19	1.62063e-09	0.438074	0.12	0.089	2.48361e-05	ILC2	Srp19
Tax1bp3	1.64039e-09	0.814383	0.034	0.019	2.5139e-05	ILC2	Tax1bp3
Gngt2	1.70544e-09	0.465915	0.091	0.064	2.61358e-05	ILC2	Gngt2
Rida	1.71774e-09	0.920098	0.027	0.014	2.63243e-05	ILC2	Rida
Pomp	1.75704e-09	0.221221	0.259	0.214	2.69267e-05	ILC2	Pomp
Rcan3	1.76727e-09	1.44755	0.014	0.005	2.70835e-05	ILC2	Rcan3
Med12l	1.77845e-09	1.80511	0.01	0.003	2.72548e-05	ILC2	Med12l
Sugp2	1.85538e-09	0.778953	0.036	0.02	2.84337e-05	ILC2	Sugp2
Cdk6	1.96978e-09	0.795212	0.045	0.027	3.01869e-05	ILC2	Cdk6
Atg16l2	2.16423e-09	0.593896	0.07	0.047	3.31668e-05	ILC2	Atg16l2
Isoc1	2.16983e-09	0.509515	0.084	0.058	3.32527e-05	ILC2	Isoc1
Atic	2.19633e-09	0.56197	0.078	0.053	3.36588e-05	ILC2	Atic
Nup210l	2.43617e-09	1.37884	0.015	0.006	3.73343e-05	ILC2	Nup210l
Ifi209	2.45103e-09	0.577123	0.074	0.05	3.7562e-05	ILC2	Ifi209
Ercc5	2.70102e-09	0.634133	0.063	0.042	4.13932e-05	ILC2	Ercc5
Csf2ra	2.7375e-09	0.905545	0.036	0.021	4.19521e-05	ILC2	Csf2ra
Rsrc2	2.83034e-09	0.207934	0.368	0.32	4.33749e-05	ILC2	Rsrc2
Stt3b	2.90562e-09	0.354712	0.184	0.148	4.45286e-05	ILC2	Stt3b
Hpn	2.95512e-09	1.12703	0.019	0.008	4.52872e-05	ILC2	Hpn
Nhp2	2.95514e-09	0.390713	0.115	0.085	4.52876e-05	ILC2	Nhp2
Pofut1	2.96278e-09	0.637768	0.053	0.034	4.54046e-05	ILC2	Pofut1
E2f6	2.98101e-09	1.12061	0.019	0.008	4.5684e-05	ILC2	E2f6
Mios	3.13134e-09	0.851798	0.034	0.019	4.79878e-05	ILC2	Mios
Psma1	3.18611e-09	0.233715	0.247	0.204	4.88271e-05	ILC2	Psma1
Pigk	3.2895e-09	0.495301	0.097	0.07	5.04115e-05	ILC2	Pigk
Fkbp3	3.33913e-09	0.158064	0.353	0.302	5.11721e-05	ILC2	Fkbp3
Ncf2	3.37926e-09	0.96557	0.025	0.012	5.17872e-05	ILC2	Ncf2
Pa2g4	3.41578e-09	0.331065	0.21	0.171	5.23469e-05	ILC2	Pa2g4
Rp9	3.42366e-09	0.272726	0.207	0.167	5.24676e-05	ILC2	Rp9
Mllt3	3.47097e-09	0.301373	0.179	0.143	5.31925e-05	ILC2	Mllt3
Arhgef1	3.4778e-09	0.205993	0.375	0.327	5.32974e-05	ILC2	Arhgef1
Stn1	3.51656e-09	0.495953	0.088	0.062	5.38914e-05	ILC2	Stn1
Kremen1	3.63413e-09	1.00441	0.027	0.014	5.56931e-05	ILC2	Kremen1
BC004004	4.02794e-09	0.443304	0.11	0.081	6.17282e-05	ILC2	BC004004
Eed	4.1166e-09	0.340264	0.149	0.115	6.30869e-05	ILC2	Eed
Pctp	4.21204e-09	0.999544	0.025	0.012	6.45496e-05	ILC2	Pctp
Zfp422	4.28618e-09	0.914584	0.028	0.015	6.56857e-05	ILC2	Zfp422
Sh3rf1	4.5301e-09	1.47326	0.012	0.004	6.94238e-05	ILC2	Sh3rf1
Gm7030	4.69286e-09	0.596125	0.055	0.035	7.19181e-05	ILC2	Gm7030
Asnsd1	4.70275e-09	0.671839	0.052	0.033	7.20696e-05	ILC2	Asnsd1
Ak3	4.75719e-09	0.664169	0.05	0.031	7.29039e-05	ILC2	Ak3
Hdac10	4.75842e-09	1.14029	0.019	0.008	7.29228e-05	ILC2	Hdac10
Mybbp1a	4.79681e-09	0.444332	0.104	0.076	7.35112e-05	ILC2	Mybbp1a
Ubn2	4.93504e-09	0.370336	0.123	0.092	7.56294e-05	ILC2	Ubn2
Psma7	4.95727e-09	0.132105	0.502	0.446	7.59702e-05	ILC2	Psma7
Cct7	5.13855e-09	0.225694	0.311	0.267	7.87482e-05	ILC2	Cct7
Arih1	5.27191e-09	0.273653	0.312	0.268	8.07921e-05	ILC2	Arih1
B4galt4	5.37016e-09	1.62823	0.01	0.003	8.22978e-05	ILC2	B4galt4
Smchd1	5.60048e-09	0.335278	0.197	0.16	8.58273e-05	ILC2	Smchd1
Ccnt2	5.79193e-09	0.586925	0.054	0.035	8.87613e-05	ILC2	Ccnt2
Spryd7	5.80758e-09	0.511152	0.086	0.061	8.90012e-05	ILC2	Spryd7
Tmem164	5.83511e-09	0.571412	0.07	0.047	8.94231e-05	ILC2	Tmem164
Glo1	6.03223e-09	0.386663	0.112	0.083	9.2444e-05	ILC2	Glo1
Cpsf6	6.23195e-09	0.37545	0.155	0.122	9.55046e-05	ILC2	Cpsf6
4932438A13Rik	6.65079e-09	0.257029	0.223	0.183	0.000101923	ILC2	4932438A13Rik
Fars2	6.75145e-09	0.556138	0.063	0.042	0.000103466	ILC2	Fars2
Vamp1	6.76826e-09	0.923068	0.027	0.014	0.000103724	ILC2	Vamp1
Lig1	6.89899e-09	0.460647	0.103	0.075	0.000105727	ILC2	Lig1
Aph1a	7.01613e-09	0.435083	0.103	0.075	0.000107522	ILC2	Aph1a
Ago2	8.10771e-09	0.19045	0.306	0.26	0.000124251	ILC2	Ago2
Ppp5c	8.19506e-09	0.419658	0.094	0.068	0.000125589	ILC2	Ppp5c
Hat1	8.36007e-09	0.426786	0.118	0.089	0.000128118	ILC2	Hat1
Trim12a	8.69066e-09	0.373582	0.143	0.111	0.000133184	ILC2	Trim12a
Atp6v0b	8.88434e-09	0.24417	0.223	0.182	0.000136153	ILC2	Atp6v0b
Il15ra	8.953e-09	0.849348	0.032	0.018	0.000137205	ILC2	Il15ra
Hcfc1r1	9.94554e-09	0.344104	0.135	0.104	0.000152415	ILC2	Hcfc1r1
Prag1	1.01798e-08	1.03705	0.02	0.01	0.000156005	ILC2	Prag1
Rassf5	1.03659e-08	0.322504	0.166	0.131	0.000158857	ILC2	Rassf5
Pip4k2b	1.04124e-08	0.540222	0.069	0.047	0.00015957	ILC2	Pip4k2b
Plekha7	1.09319e-08	1.48863	0.011	0.004	0.000167531	ILC2	Plekha7
Ebp	1.10247e-08	0.419983	0.112	0.084	0.000168954	ILC2	Ebp
Klhl24	1.15844e-08	0.323928	0.169	0.135	0.000177531	ILC2	Klhl24
Hsbp1	1.24054e-08	0.30132	0.163	0.128	0.000190112	ILC2	Hsbp1
Mdm4	1.27341e-08	0.377733	0.152	0.119	0.00019515	ILC2	Mdm4
Tex264	1.28747e-08	0.481242	0.093	0.067	0.000197305	ILC2	Tex264
Scd2	1.31578e-08	1.22014	0.016	0.007	0.000201644	ILC2	Scd2
Bex3	1.3947e-08	0.251754	0.212	0.173	0.000213738	ILC2	Bex3
Ufc1	1.4768e-08	0.303268	0.16	0.127	0.000226319	ILC2	Ufc1
Gmcl1	1.5796e-08	0.686632	0.048	0.03	0.000242074	ILC2	Gmcl1
Fam76a	1.58039e-08	0.384059	0.124	0.094	0.000242194	ILC2	Fam76a
Fnta	1.61646e-08	0.615115	0.052	0.033	0.000247722	ILC2	Fnta
Uqcr11	1.63968e-08	0.295621	0.196	0.16	0.000251282	ILC2	Uqcr11
Smyd4	1.68578e-08	1.13823	0.02	0.01	0.000258346	ILC2	Smyd4
Fnip2	1.70825e-08	1.55575	0.011	0.004	0.000261789	ILC2	Fnip2
Zfp609	1.7151e-08	0.918114	0.031	0.017	0.000262839	ILC2	Zfp609
Rcl1	1.76791e-08	0.693301	0.05	0.032	0.000270933	ILC2	Rcl1
Trim14	1.80085e-08	0.468665	0.093	0.067	0.000275981	ILC2	Trim14
Rbm28	1.86872e-08	0.353962	0.146	0.114	0.000286381	ILC2	Rbm28
Med7	1.91313e-08	0.764916	0.038	0.022	0.000293187	ILC2	Med7
Axin2	1.92556e-08	0.734022	0.041	0.025	0.000295092	ILC2	Axin2
Dpm3	1.96217e-08	0.276689	0.2	0.163	0.000300703	ILC2	Dpm3
Pdk3	2.10044e-08	0.797492	0.04	0.024	0.000321893	ILC2	Pdk3
Rrp1b	2.12214e-08	0.705569	0.049	0.031	0.000325217	ILC2	Rrp1b
Sprtn	2.22577e-08	0.962896	0.024	0.013	0.000341099	ILC2	Sprtn
Il2ra	2.24164e-08	0.140415	0.495	0.445	0.000343532	ILC2	Il2ra
Tmed1	2.32529e-08	1.01578	0.02	0.01	0.000356351	ILC2	Tmed1
Atp11a	2.33288e-08	1.0875	0.02	0.009	0.000357514	ILC2	Atp11a
Map2k6	2.34992e-08	0.792205	0.036	0.021	0.000360125	ILC2	Map2k6
Thumpd2	2.38485e-08	1.27585	0.017	0.008	0.000365478	ILC2	Thumpd2
Cetn2	2.42161e-08	0.251403	0.21	0.172	0.000371112	ILC2	Cetn2
Bdh1	2.54686e-08	1.03678	0.02	0.01	0.000390306	ILC2	Bdh1
Tm9sf3	2.55254e-08	0.208002	0.33	0.286	0.000391177	ILC2	Tm9sf3
Celsr1	2.56789e-08	1.50742	0.01	0.003	0.000393529	ILC2	Celsr1
Ccdc69	2.58943e-08	0.744223	0.037	0.022	0.00039683	ILC2	Ccdc69
Mrpl18	2.6032e-08	0.483897	0.082	0.058	0.00039894	ILC2	Mrpl18
Gaa	2.67038e-08	0.627396	0.056	0.037	0.000409236	ILC2	Gaa
Rccd1	2.70317e-08	0.809987	0.032	0.018	0.000414261	ILC2	Rccd1
Hspb11	2.76843e-08	0.586054	0.051	0.033	0.000424262	ILC2	Hspb11
Vegfb	2.79203e-08	0.831481	0.029	0.016	0.000427878	ILC2	Vegfb
Avil	2.79306e-08	0.808681	0.039	0.023	0.000428037	ILC2	Avil
Vdac1	2.82459e-08	0.322964	0.161	0.128	0.000432868	ILC2	Vdac1
Lsm3	3.24973e-08	0.360728	0.12	0.092	0.000498022	ILC2	Lsm3
Kif3a	3.28327e-08	0.748522	0.037	0.022	0.000503161	ILC2	Kif3a
Ralgapa1	3.45216e-08	0.397348	0.095	0.069	0.000529044	ILC2	Ralgapa1
Gimap5	3.51775e-08	0.243886	0.33	0.289	0.000539096	ILC2	Gimap5
Eif1b	3.59192e-08	0.349698	0.14	0.109	0.000550461	ILC2	Eif1b
Ccar1	3.62065e-08	0.249997	0.218	0.18	0.000554864	ILC2	Ccar1
Cyb5b	3.63311e-08	0.42609	0.093	0.068	0.000556774	ILC2	Cyb5b
Ipo7	3.63763e-08	0.435156	0.097	0.072	0.000557467	ILC2	Ipo7
Casd1	3.68299e-08	0.809355	0.036	0.021	0.000564419	ILC2	Casd1
Top2a	3.78237e-08	0.981983	0.019	0.009	0.000579648	ILC2	Top2a
Ezh1	3.8976e-08	0.361333	0.131	0.101	0.000597307	ILC2	Ezh1
Dip2a	3.96609e-08	1.37017	0.012	0.004	0.000607803	ILC2	Dip2a
Atxn10	4.01217e-08	0.367759	0.152	0.121	0.000614865	ILC2	Atxn10
Tmem97	4.10263e-08	0.685145	0.038	0.023	0.000628728	ILC2	Tmem97
Gpatch4	4.17368e-08	0.876188	0.03	0.017	0.000639616	ILC2	Gpatch4
0610030E20Rik	4.31279e-08	0.720892	0.039	0.024	0.000660935	ILC2	0610030E20Rik
Tgs1	4.40909e-08	0.485538	0.075	0.053	0.000675693	ILC2	Tgs1
Sirt2	4.43086e-08	0.36303	0.146	0.115	0.000679029	ILC2	Sirt2
Wipf1	4.55483e-08	0.310513	0.163	0.131	0.000698027	ILC2	Wipf1
Mcm3ap	4.91445e-08	0.513515	0.074	0.052	0.000753139	ILC2	Mcm3ap
Txnl1	4.92e-08	0.273473	0.334	0.293	0.00075399	ILC2	Txnl1
Map2k2	5.27288e-08	0.231952	0.223	0.185	0.00080807	ILC2	Map2k2
Ccdc88b	5.39473e-08	0.415894	0.099	0.074	0.000826742	ILC2	Ccdc88b
Akap9	5.49945e-08	0.248167	0.184	0.149	0.000842791	ILC2	Akap9
Zfp512b	5.59006e-08	0.887567	0.026	0.014	0.000856677	ILC2	Zfp512b
Dcps	5.68384e-08	0.428755	0.088	0.064	0.000871048	ILC2	Dcps
Atp13a2	5.70768e-08	1.39007	0.012	0.005	0.000874702	ILC2	Atp13a2
Ubl4a	5.95825e-08	0.500358	0.067	0.047	0.000913102	ILC2	Ubl4a
Vgll4	6.18385e-08	0.288361	0.164	0.131	0.000947675	ILC2	Vgll4
Parp9	6.5324e-08	0.525753	0.07	0.049	0.00100109	ILC2	Parp9
Abcc4	6.53921e-08	1.13268	0.015	0.006	0.00100213	ILC2	Abcc4
Cab39	6.59998e-08	0.256004	0.198	0.163	0.00101145	ILC2	Cab39
Ythdf2	6.66525e-08	0.445841	0.11	0.083	0.00102145	ILC2	Ythdf2
Rbck1	6.72256e-08	0.32042	0.145	0.114	0.00103023	ILC2	Rbck1
Sdf2	6.83524e-08	0.231707	0.228	0.19	0.0010475	ILC2	Sdf2
Zdhhc21	6.85537e-08	0.681209	0.04	0.025	0.00105059	ILC2	Zdhhc21
Tmed3	7.05363e-08	0.440976	0.087	0.064	0.00108097	ILC2	Tmed3
St3gal4	7.07596e-08	0.759301	0.033	0.019	0.00108439	ILC2	St3gal4
Tnfrsf11a	7.98608e-08	1.09556	0.018	0.009	0.00122387	ILC2	Tnfrsf11a
Sod1	8.1534e-08	0.158302	0.388	0.341	0.00124951	ILC2	Sod1
Nop58	8.1869e-08	0.2362	0.24	0.202	0.00125464	ILC2	Nop58
Stx16	8.31769e-08	0.438944	0.082	0.059	0.00127469	ILC2	Stx16
Lrch3	8.58537e-08	0.417724	0.1	0.074	0.00131571	ILC2	Lrch3
Gm26532	8.67495e-08	0.562102	0.06	0.041	0.00132944	ILC2	Gm26532
Il6st	8.8151e-08	0.907675	0.023	0.012	0.00135091	ILC2	Il6st
Abhd16a	8.99512e-08	0.331634	0.155	0.124	0.0013785	ILC2	Abhd16a
Fem1c	9.20561e-08	0.3923	0.114	0.087	0.00141076	ILC2	Fem1c
Pigp	9.35539e-08	0.326452	0.164	0.132	0.00143371	ILC2	Pigp
Arl4a	9.44853e-08	0.263028	0.186	0.152	0.00144799	ILC2	Arl4a
Abca7	9.56778e-08	0.661911	0.049	0.032	0.00146626	ILC2	Abca7
Scrib	1.00743e-07	0.692124	0.039	0.024	0.00154389	ILC2	Scrib
Ccdc50	1.02321e-07	0.33075	0.182	0.149	0.00156807	ILC2	Ccdc50
Rtp4	1.04294e-07	0.714568	0.037	0.022	0.0015983	ILC2	Rtp4
Wdr44	1.06268e-07	0.473748	0.077	0.055	0.00162855	ILC2	Wdr44
Gapvd1	1.07993e-07	0.360634	0.117	0.09	0.001655	ILC2	Gapvd1
Pigs	1.08e-07	0.507571	0.073	0.052	0.0016551	ILC2	Pigs
Gnpnat1	1.10608e-07	0.552185	0.069	0.048	0.00169507	ILC2	Gnpnat1
Hadh	1.16424e-07	0.415735	0.116	0.089	0.0017842	ILC2	Hadh
AI467606	1.18991e-07	0.754832	0.031	0.018	0.00182353	ILC2	AI467606
Abcg3	1.21896e-07	1.01923	0.019	0.009	0.00186806	ILC2	Abcg3
Guk1	1.21992e-07	0.427619	0.091	0.067	0.00186953	ILC2	Guk1
Mrto4	1.22176e-07	0.584318	0.054	0.036	0.00187234	ILC2	Mrto4
Mcm3	1.2222e-07	0.636768	0.043	0.027	0.00187302	ILC2	Mcm3
Wdr6	1.28623e-07	0.592111	0.049	0.032	0.00197115	ILC2	Wdr6
Nlrc3	1.31423e-07	0.410289	0.099	0.074	0.00201405	ILC2	Nlrc3
Llph	1.32695e-07	0.224932	0.263	0.224	0.00203354	ILC2	Llph
Smim11	1.33683e-07	0.295941	0.154	0.123	0.00204869	ILC2	Smim11
Snx30	1.35957e-07	0.95891	0.02	0.01	0.00208354	ILC2	Snx30
Pbx2	1.36715e-07	0.608476	0.05	0.033	0.00209516	ILC2	Pbx2
Kbtbd3	1.39447e-07	0.817489	0.025	0.013	0.00213702	ILC2	Kbtbd3
Spag6l	1.443e-07	1.2448	0.013	0.005	0.0022114	ILC2	Spag6l
Clcn5	1.45135e-07	1.12703	0.014	0.006	0.00222419	ILC2	Clcn5
Npepl1	1.51578e-07	0.448791	0.087	0.064	0.00232293	ILC2	Npepl1
Srm	1.62869e-07	0.645065	0.039	0.024	0.00249597	ILC2	Srm
Mak16	1.65747e-07	0.322297	0.108	0.082	0.00254008	ILC2	Mak16
Psme2	1.65862e-07	0.127097	0.466	0.417	0.00254184	ILC2	Psme2
Tmem147	1.67087e-07	0.349247	0.122	0.094	0.00256061	ILC2	Tmem147
Gm6034	1.72241e-07	1.07575	0.017	0.008	0.0026396	ILC2	Gm6034
Pfkm	1.72849e-07	1.04155	0.019	0.009	0.00264892	ILC2	Pfkm
Slc7a5	1.73517e-07	0.836583	0.029	0.017	0.00265915	ILC2	Slc7a5
Slc25a16	1.73979e-07	0.681313	0.038	0.023	0.00266622	ILC2	Slc25a16
Agpat1	1.74173e-07	0.553566	0.06	0.041	0.0026692	ILC2	Agpat1
Adgrl1	1.8349e-07	0.429775	0.088	0.065	0.00281199	ILC2	Adgrl1
Trerf1	1.92686e-07	0.606897	0.057	0.039	0.00295291	ILC2	Trerf1
Nifk	1.97929e-07	0.498073	0.068	0.048	0.00303326	ILC2	Nifk
Aff1	2.03586e-07	0.212212	0.222	0.185	0.00311995	ILC2	Aff1
Ndufb9	2.07525e-07	0.255586	0.188	0.155	0.00318032	ILC2	Ndufb9
Btla	2.08352e-07	1.33562	0.011	0.004	0.00319299	ILC2	Btla
Phka1	2.10007e-07	0.945283	0.023	0.012	0.00321836	ILC2	Phka1
Apobec3	2.1631e-07	0.153719	0.33	0.287	0.00331495	ILC2	Apobec3
Med12	2.28171e-07	0.545042	0.054	0.036	0.00349672	ILC2	Med12
Mettl1	2.32268e-07	0.692364	0.042	0.027	0.0035595	ILC2	Mettl1
Zfp451	2.34548e-07	0.587798	0.044	0.029	0.00359445	ILC2	Zfp451
Psmg2	2.34805e-07	0.459262	0.072	0.052	0.00359839	ILC2	Psmg2
Plaa	2.41301e-07	0.428251	0.098	0.074	0.00369794	ILC2	Plaa
Abca2	2.4159e-07	0.554639	0.057	0.039	0.00370237	ILC2	Abca2
Cpne3	2.51635e-07	0.333141	0.134	0.106	0.00385631	ILC2	Cpne3
Cfl2	2.57149e-07	0.743705	0.034	0.021	0.00394081	ILC2	Cfl2
Cul9	2.58971e-07	0.873818	0.027	0.015	0.00396872	ILC2	Cul9
Itfg1	2.62943e-07	0.460308	0.078	0.057	0.0040296	ILC2	Itfg1
Snhg1	2.63197e-07	0.182676	0.288	0.248	0.00403349	ILC2	Snhg1
Babam2	2.78721e-07	0.307976	0.135	0.106	0.00427141	ILC2	Babam2
Tm2d3	2.96748e-07	0.663963	0.036	0.022	0.00454766	ILC2	Tm2d3
Cfap54	2.96787e-07	0.945968	0.019	0.009	0.00454827	ILC2	Cfap54
Srek1	3.02401e-07	0.360508	0.1	0.076	0.00463429	ILC2	Srek1
Cdc42se2	3.32657e-07	0.196067	0.28	0.241	0.00509797	ILC2	Cdc42se2
P4hb	3.34227e-07	0.206079	0.249	0.211	0.00512203	ILC2	P4hb
Stt3a	3.35828e-07	0.305215	0.152	0.122	0.00514657	ILC2	Stt3a
Zbtb37	3.45107e-07	1.22805	0.013	0.006	0.00528876	ILC2	Zbtb37
Gm14325	3.46178e-07	0.716448	0.031	0.018	0.00530518	ILC2	Gm14325
Taok3	3.46905e-07	0.368554	0.128	0.101	0.00531633	ILC2	Taok3
Ahrr	3.6246e-07	0.960383	0.021	0.011	0.0055547	ILC2	Ahrr
Acvr1b	3.68479e-07	1.06814	0.016	0.007	0.00564695	ILC2	Acvr1b
Osgin1	3.70963e-07	0.446783	0.099	0.075	0.00568501	ILC2	Osgin1
Usp33	3.7735e-07	0.780776	0.032	0.019	0.00578288	ILC2	Usp33
Arhgap4	3.95689e-07	0.343243	0.142	0.114	0.00606393	ILC2	Arhgap4
Sf3b5	4.12509e-07	0.172449	0.269	0.23	0.0063217	ILC2	Sf3b5
Snhg4	4.38444e-07	1.22756	0.014	0.006	0.00671915	ILC2	Snhg4
Ndufb10	4.40043e-07	0.218645	0.199	0.165	0.00674366	ILC2	Ndufb10
Tnfsf14	4.91937e-07	0.429882	0.092	0.069	0.00753893	ILC2	Tnfsf14
Npm3	5.06238e-07	0.26987	0.189	0.157	0.0077581	ILC2	Npm3
Fkbp4	5.16687e-07	0.283663	0.144	0.115	0.00791823	ILC2	Fkbp4
Crebzf	5.3258e-07	0.526949	0.071	0.051	0.00816179	ILC2	Crebzf
Abhd13	5.36138e-07	0.641463	0.039	0.025	0.00821631	ILC2	Abhd13
E130308A19Rik	5.39165e-07	0.750281	0.029	0.017	0.0082627	ILC2	E130308A19Rik
Rcan1	5.42186e-07	1.00471	0.019	0.01	0.00830899	ILC2	Rcan1
Borcs8	5.42944e-07	0.424909	0.091	0.069	0.00832062	ILC2	Borcs8
Bak1	5.50759e-07	0.526804	0.052	0.035	0.00844038	ILC2	Bak1
Scoc	5.68387e-07	0.762739	0.032	0.019	0.00871053	ILC2	Scoc
Hist1h4n	5.80455e-07	1.45718	0.01	0.004	0.00889547	ILC2	Hist1h4n
Cdk4	5.84079e-07	0.282302	0.182	0.151	0.00895101	ILC2	Cdk4
Nt5c3b	5.84129e-07	0.477863	0.059	0.041	0.00895178	ILC2	Nt5c3b
Lrmda	5.87171e-07	0.82627	0.022	0.012	0.0089984	ILC2	Lrmda
Stradb	5.87381e-07	1.34873	0.01	0.004	0.00900161	ILC2	Stradb
Abracl	5.90332e-07	0.149654	0.302	0.26	0.00904684	ILC2	Abracl
mt-Nd3	6.02436e-07	0.103041	0.574	0.526	0.00923234	ILC2	mt-Nd3
Tapt1	6.46564e-07	0.42294	0.095	0.073	0.0099086	ILC2	Tapt1
Crebrf	6.57288e-07	0.275088	0.177	0.146	0.0100729	ILC2	Crebrf
E2f4	6.62523e-07	0.303203	0.149	0.121	0.0101532	ILC2	E2f4
Mfap3	6.74165e-07	0.635947	0.044	0.029	0.0103316	ILC2	Mfap3
Gbp9	6.7453e-07	0.482165	0.062	0.044	0.0103372	ILC2	Gbp9
Snupn	6.76053e-07	0.872219	0.023	0.013	0.0103605	ILC2	Snupn
Pan3	6.80472e-07	0.356397	0.12	0.094	0.0104282	ILC2	Pan3
Tbk1	6.8735e-07	0.385909	0.092	0.07	0.0105336	ILC2	Tbk1
Auh	6.88046e-07	0.334529	0.117	0.092	0.0105443	ILC2	Auh
Gm12840	7.12783e-07	0.181063	0.098	0.074	0.0109234	ILC2	Gm12840
Ick	7.21122e-07	0.91202	0.02	0.011	0.0110512	ILC2	Ick
Czib	7.28089e-07	0.544687	0.049	0.033	0.011158	ILC2	Czib
Plxnc1	7.40336e-07	0.644895	0.032	0.019	0.0113456	ILC2	Plxnc1
D030028A08Rik	7.49082e-07	0.879803	0.023	0.013	0.0114797	ILC2	D030028A08Rik
Cytip	7.66532e-07	0.100873	0.692	0.646	0.0117471	ILC2	Cytip
Agrp	7.68015e-07	1.03957	0.016	0.008	0.0117698	ILC2	Agrp
Pink1	7.99214e-07	0.24928	0.217	0.184	0.0122479	ILC2	Pink1
Zdhhc13	8.29772e-07	0.701851	0.034	0.021	0.0127163	ILC2	Zdhhc13
Eif3d	8.35872e-07	0.241243	0.221	0.188	0.0128097	ILC2	Eif3d
Fam120c	8.48993e-07	0.926894	0.022	0.012	0.0130108	ILC2	Fam120c
Mfng	8.61547e-07	0.456328	0.075	0.055	0.0132032	ILC2	Mfng
Pds5b	9.10532e-07	0.377934	0.106	0.082	0.0139539	ILC2	Pds5b
Mpp6	9.1202e-07	0.576751	0.045	0.03	0.0139767	ILC2	Mpp6
Mrpl12	9.50089e-07	0.418938	0.073	0.053	0.0145601	ILC2	Mrpl12
Rsad2	9.53003e-07	0.976872	0.018	0.009	0.0146048	ILC2	Rsad2
Kif21b	9.63282e-07	0.419533	0.093	0.07	0.0147623	ILC2	Kif21b
Lrpap1	9.80149e-07	0.336084	0.11	0.085	0.0150208	ILC2	Lrpap1
Gm11808	9.86831e-07	0.618578	0.043	0.029	0.0151232	ILC2	Gm11808
Gdi2	9.90074e-07	0.145031	0.327	0.286	0.0151729	ILC2	Gdi2
Plagl2	1.00433e-06	0.524296	0.053	0.036	0.0153913	ILC2	Plagl2
Zfp973	1.00671e-06	0.734284	0.034	0.021	0.0154279	ILC2	Zfp973
Vcpip1	1.01791e-06	0.404338	0.082	0.061	0.0155995	ILC2	Vcpip1
Sf3a1	1.03463e-06	0.398179	0.083	0.062	0.0158556	ILC2	Sf3a1
Trpm3	1.06196e-06	0.895303	0.022	0.012	0.0162745	ILC2	Trpm3
Tmem184c	1.10746e-06	0.919875	0.019	0.01	0.0169718	ILC2	Tmem184c
Zhx3	1.11084e-06	0.929094	0.019	0.01	0.0170236	ILC2	Zhx3
Ubr4	1.11185e-06	0.348343	0.116	0.091	0.0170392	ILC2	Ubr4
Il18bp	1.12844e-06	0.740975	0.024	0.013	0.0172933	ILC2	Il18bp
Stau2	1.1417e-06	0.799436	0.026	0.015	0.0174966	ILC2	Stau2
Tomm22	1.23541e-06	0.174298	0.286	0.248	0.0189327	ILC2	Tomm22
Per3	1.26587e-06	0.909636	0.02	0.01	0.0193994	ILC2	Per3
Pacs2	1.26648e-06	0.62389	0.042	0.028	0.0194088	ILC2	Pacs2
Npepps	1.31631e-06	0.396578	0.096	0.074	0.0201724	ILC2	Npepps
Grcc10	1.3347e-06	0.24299	0.214	0.182	0.0204542	ILC2	Grcc10
Man1b1	1.35339e-06	0.394853	0.095	0.073	0.0207407	ILC2	Man1b1
Ngly1	1.37486e-06	0.360185	0.094	0.072	0.0210697	ILC2	Ngly1
Trrap	1.37941e-06	0.391303	0.091	0.069	0.0211395	ILC2	Trrap
Asap1	1.38834e-06	0.446571	0.073	0.053	0.0212763	ILC2	Asap1
Prdm11	1.40949e-06	0.852934	0.021	0.011	0.0216005	ILC2	Prdm11
Larp4	1.42868e-06	0.486441	0.074	0.054	0.0218946	ILC2	Larp4
Maz	1.43874e-06	0.399817	0.099	0.077	0.0220486	ILC2	Maz
Enpp5	1.44311e-06	0.316909	0.129	0.103	0.0221156	ILC2	Enpp5
Birc6	1.45263e-06	0.227291	0.233	0.199	0.0222615	ILC2	Birc6
Cfap77	1.49123e-06	1.18061	0.011	0.005	0.0228531	ILC2	Cfap77
Akr1b3	1.53112e-06	0.20938	0.262	0.228	0.0234644	ILC2	Akr1b3
Terf2	1.53662e-06	0.547489	0.06	0.043	0.0235486	ILC2	Terf2
C2cd5	1.57036e-06	0.499357	0.058	0.041	0.0240658	ILC2	C2cd5
Ankrd17	1.61792e-06	0.302904	0.12	0.095	0.0247946	ILC2	Ankrd17
Reep5	1.61826e-06	0.172594	0.257	0.22	0.0247999	ILC2	Reep5
Hmgcr	1.69315e-06	0.32616	0.106	0.082	0.0259476	ILC2	Hmgcr
Crip1	1.71881e-06	0.104447	0.256	0.218	0.0263408	ILC2	Crip1
Orc6	1.77059e-06	0.464531	0.052	0.036	0.0271342	ILC2	Orc6
Ppan	1.77609e-06	0.485316	0.059	0.042	0.0272187	ILC2	Ppan
Ttc13	1.8118e-06	0.693395	0.027	0.016	0.0277659	ILC2	Ttc13
Naa38	1.83686e-06	0.346638	0.11	0.086	0.0281498	ILC2	Naa38
Fastkd1	1.93007e-06	1.09687	0.015	0.007	0.0295783	ILC2	Fastkd1
Zdhhc20	1.97501e-06	0.299704	0.159	0.131	0.030267	ILC2	Zdhhc20
Nop10	2.00721e-06	0.143769	0.352	0.311	0.0307605	ILC2	Nop10
Cpm	2.02334e-06	0.46807	0.064	0.046	0.0310076	ILC2	Cpm
Nmt2	2.03062e-06	0.515926	0.078	0.059	0.0311193	ILC2	Nmt2
Hdac2	2.07396e-06	0.356381	0.09	0.068	0.0317835	ILC2	Hdac2
Rpa3	2.08546e-06	0.293952	0.108	0.084	0.0319597	ILC2	Rpa3
Srebf2	2.08582e-06	0.239529	0.194	0.163	0.0319652	ILC2	Srebf2
Slc39a11	2.10943e-06	0.720216	0.029	0.017	0.0323271	ILC2	Slc39a11
Ccdc62	2.12734e-06	1.11229	0.015	0.007	0.0326015	ILC2	Ccdc62
Mlec	2.13516e-06	0.212917	0.178	0.147	0.0327213	ILC2	Mlec
Zfp729b	2.13838e-06	0.790458	0.021	0.012	0.0327706	ILC2	Zfp729b
Serbp1	2.1531e-06	0.104589	0.613	0.569	0.0329962	ILC2	Serbp1
Edf1	2.18713e-06	0.106062	0.353	0.31	0.0335178	ILC2	Edf1
Ruvbl1	2.2472e-06	0.366062	0.094	0.072	0.0344383	ILC2	Ruvbl1
Hist1h2be	2.31558e-06	0.572444	0.038	0.025	0.0354863	ILC2	Hist1h2be
Cep350	2.32243e-06	0.274897	0.175	0.146	0.0355912	ILC2	Cep350
Smarce1	2.33277e-06	0.211558	0.223	0.19	0.0357498	ILC2	Smarce1
Tsr1	2.37084e-06	0.583891	0.039	0.025	0.0363332	ILC2	Tsr1
Tmbim4	2.40867e-06	0.178224	0.325	0.288	0.0369129	ILC2	Tmbim4
Fuca2	2.56752e-06	0.451169	0.087	0.066	0.0393472	ILC2	Fuca2
Slc9a1	2.58736e-06	0.517275	0.058	0.041	0.0396513	ILC2	Slc9a1
Mir155hg	2.59045e-06	0.879106	0.024	0.014	0.0396987	ILC2	Mir155hg
H2-Q10	2.59791e-06	0.778437	0.029	0.018	0.0398129	ILC2	H2-Q10
Mpc2	2.67277e-06	0.208341	0.193	0.162	0.0409602	ILC2	Mpc2
Ripk3	2.73982e-06	0.484385	0.052	0.036	0.0419877	ILC2	Ripk3
Sepsecs	2.7518e-06	0.909214	0.018	0.009	0.0421713	ILC2	Sepsecs
Pigc	2.82827e-06	0.48198	0.053	0.037	0.0433433	ILC2	Pigc
Zfyve16	2.84397e-06	0.60376	0.044	0.03	0.0435838	ILC2	Zfyve16
H2afj	2.84923e-06	0.22669	0.187	0.157	0.0436645	ILC2	H2afj
Insr	2.90474e-06	0.4773	0.053	0.037	0.0445151	ILC2	Insr
Dhrs1	2.90629e-06	0.484385	0.052	0.036	0.0445388	ILC2	Dhrs1
1110059E24Rik	2.91515e-06	0.711996	0.03	0.019	0.0446746	ILC2	1110059E24Rik
Cdc26	2.92635e-06	0.309443	0.128	0.103	0.0448464	ILC2	Cdc26
2310009B15Rik	2.99424e-06	0.59496	0.034	0.021	0.0458867	ILC2	2310009B15Rik
Polr2e	3.02436e-06	0.236991	0.18	0.15	0.0463483	ILC2	Polr2e
Ercc6l2	3.07431e-06	0.45843	0.062	0.045	0.0471138	ILC2	Ercc6l2
Uqcc2	3.08284e-06	0.363836	0.091	0.07	0.0472445	ILC2	Uqcc2
Tbc1d9b	3.10351e-06	0.224394	0.163	0.135	0.0475614	ILC2	Tbc1d9b
Got2	3.13022e-06	0.343827	0.12	0.096	0.0479706	ILC2	Got2
Klhl28	3.13564e-06	0.648301	0.03	0.018	0.0480537	ILC2	Klhl28
Ifitm3	3.15664e-06	0.76697	0.023	0.013	0.0483756	ILC2	Ifitm3
Tprgl	3.21045e-06	0.168008	0.323	0.286	0.0492002	ILC2	Tprgl
Ubqln1	3.21884e-06	0.270019	0.168	0.14	0.0493288	ILC2	Ubqln1
Sumf1	3.24839e-06	0.614422	0.039	0.026	0.0497816	ILC2	Sumf1
Txndc9	3.28527e-06	0.254312	0.163	0.135	0.0503467	ILC2	Txndc9
Dcxr	3.3224e-06	0.723717	0.024	0.014	0.0509158	ILC2	Dcxr
Twsg1	3.36267e-06	0.673861	0.029	0.017	0.051533	ILC2	Twsg1
Atp5k	3.45077e-06	0.30837	0.126	0.101	0.0528831	ILC2	Atp5k
Cenpt	3.45915e-06	1.13673	0.012	0.006	0.0530115	ILC2	Cenpt
Akip1	3.46228e-06	0.78106	0.025	0.015	0.0530594	ILC2	Akip1
Scyl3	3.46383e-06	0.526095	0.051	0.036	0.0530832	ILC2	Scyl3
Dtymk	3.47059e-06	0.396762	0.07	0.051	0.0531868	ILC2	Dtymk
Emc2	3.59078e-06	0.264092	0.162	0.134	0.0550287	ILC2	Emc2
As3mt	3.61394e-06	0.519924	0.037	0.024	0.0553836	ILC2	As3mt
Mrpl54	3.83291e-06	0.271262	0.154	0.127	0.0587394	ILC2	Mrpl54
Swi5	3.92722e-06	0.178432	0.27	0.234	0.0601847	ILC2	Swi5
Dph5	3.95296e-06	0.480323	0.063	0.046	0.0605791	ILC2	Dph5
Trappc6b	4.02017e-06	0.22824	0.212	0.181	0.0616091	ILC2	Trappc6b
1600002K03Rik	4.02382e-06	0.594778	0.046	0.031	0.061665	ILC2	1600002K03Rik
Gm17018	4.03932e-06	0.546912	0.043	0.029	0.0619025	ILC2	Gm17018
Ccnt1	4.07049e-06	0.242917	0.192	0.163	0.0623802	ILC2	Ccnt1
Zfp871	4.08973e-06	0.376155	0.084	0.064	0.0626751	ILC2	Zfp871
Itpkb	4.1277e-06	0.218132	0.149	0.122	0.063257	ILC2	Itpkb
Phtf2	4.14788e-06	0.380283	0.074	0.056	0.0635662	ILC2	Phtf2
Nit2	4.15383e-06	0.616496	0.038	0.025	0.0636575	ILC2	Nit2
Runx1	4.17786e-06	0.168689	0.254	0.219	0.0640258	ILC2	Runx1
Slc12a2	4.19514e-06	1.01503	0.018	0.009	0.0642905	ILC2	Slc12a2
Ifi35	4.24725e-06	0.358924	0.109	0.086	0.0650891	ILC2	Ifi35
Iqcb1	4.32585e-06	0.585578	0.045	0.03	0.0662937	ILC2	Iqcb1
Ndufv3	4.38888e-06	0.195646	0.259	0.225	0.0672595	ILC2	Ndufv3
Carf	4.55828e-06	0.665175	0.036	0.023	0.0698556	ILC2	Carf
Ndufb3	4.62849e-06	0.225817	0.196	0.166	0.0709317	ILC2	Ndufb3
Map4k5	4.64778e-06	0.739814	0.024	0.014	0.0712273	ILC2	Map4k5
Nr3c2	4.65753e-06	1.06364	0.014	0.007	0.0713767	ILC2	Nr3c2
Cr1l	4.69579e-06	0.213512	0.205	0.174	0.071963	ILC2	Cr1l
Mtmr10	4.75142e-06	1.19002	0.015	0.008	0.0728155	ILC2	Mtmr10
Pusl1	4.75168e-06	1.05839	0.013	0.006	0.0728195	ILC2	Pusl1
Emc4	4.86458e-06	0.246518	0.168	0.14	0.0745496	ILC2	Emc4
Tm7sf3	5.06905e-06	0.565787	0.049	0.034	0.0776831	ILC2	Tm7sf3
Gm14305	5.12515e-06	0.887567	0.019	0.011	0.0785429	ILC2	Gm14305
Nbn	5.18825e-06	0.265661	0.178	0.15	0.07951	ILC2	Nbn
Coa5	5.30399e-06	0.40425	0.075	0.056	0.0812837	ILC2	Coa5
Ccdc122	5.30744e-06	1.13051	0.011	0.005	0.0813366	ILC2	Ccdc122
Hsdl1	5.41111e-06	0.878169	0.018	0.01	0.0829252	ILC2	Hsdl1
Alkbh3	5.4273e-06	0.51208	0.052	0.037	0.0831734	ILC2	Alkbh3
Pdcd5	5.48301e-06	0.254955	0.151	0.124	0.0840271	ILC2	Pdcd5
Lrrc58	5.52936e-06	0.342451	0.169	0.142	0.0847375	ILC2	Lrrc58
Rbm5	5.54028e-06	0.240901	0.17	0.141	0.0849048	ILC2	Rbm5
Tmem50b	5.67032e-06	0.456348	0.065	0.047	0.0868976	ILC2	Tmem50b
Usp34	5.7281e-06	0.27129	0.175	0.147	0.0877832	ILC2	Usp34
Cluap1	5.77217e-06	0.577695	0.035	0.022	0.0884585	ILC2	Cluap1
Impdh2	5.9147e-06	0.203896	0.33	0.294	0.0906427	ILC2	Impdh2
Tmem258	5.99607e-06	0.129007	0.298	0.26	0.0918898	ILC2	Tmem258
Herc3	6.09205e-06	0.474118	0.054	0.038	0.0933606	ILC2	Herc3
Evi2a	6.15513e-06	0.288419	0.166	0.139	0.0943273	ILC2	Evi2a
Zmynd11	6.27264e-06	0.211746	0.215	0.184	0.0961282	ILC2	Zmynd11
Med15	6.30035e-06	0.375348	0.095	0.074	0.0965529	ILC2	Med15
Zfp746	6.32136e-06	0.507801	0.055	0.039	0.0968749	ILC2	Zfp746
Tmem134	6.35584e-06	0.231573	0.179	0.15	0.0974033	ILC2	Tmem134
Ireb2	6.42329e-06	0.493903	0.053	0.038	0.0984369	ILC2	Ireb2
Lamtor3	6.43507e-06	0.439333	0.074	0.055	0.0986174	ILC2	Lamtor3
Irak1	6.51961e-06	0.264608	0.135	0.11	0.099913	ILC2	Irak1
Taf3	6.54425e-06	0.33646	0.106	0.084	0.100291	ILC2	Taf3
Hist1h4c	6.62072e-06	0.76763	0.027	0.016	0.101463	ILC2	Hist1h4c
Iglc1	6.63308e-06	0.1454	0.252	0.219	0.101652	ILC2	Iglc1
Styx	6.98162e-06	0.603847	0.036	0.024	0.106993	ILC2	Styx
Map2k5	6.9829e-06	0.507241	0.056	0.04	0.107013	ILC2	Map2k5
Ogfr	7.10137e-06	0.305363	0.128	0.104	0.108829	ILC2	Ogfr
Nadk2	7.14206e-06	0.606235	0.034	0.022	0.109452	ILC2	Nadk2
Dmac1	7.63003e-06	0.404892	0.058	0.041	0.11693	ILC2	Dmac1
Mrpl11	7.69377e-06	0.344349	0.085	0.065	0.117907	ILC2	Mrpl11
Tomm5	7.75982e-06	0.294552	0.117	0.094	0.118919	ILC2	Tomm5
Psmc3	7.79986e-06	0.210647	0.215	0.184	0.119533	ILC2	Psmc3
Ank	7.87692e-06	0.408175	0.095	0.074	0.120714	ILC2	Ank
Nol11	8.0458e-06	0.439613	0.059	0.043	0.123302	ILC2	Nol11
Tma16	8.12536e-06	0.648442	0.036	0.023	0.124521	ILC2	Tma16
Dip2b	8.16401e-06	0.366942	0.087	0.067	0.125114	ILC2	Dip2b
Ctse	8.24018e-06	0.434882	0.078	0.06	0.126281	ILC2	Ctse
Epcam	8.32064e-06	0.715979	0.023	0.013	0.127514	ILC2	Epcam
Dpy19l3	8.35468e-06	0.386546	0.078	0.059	0.128035	ILC2	Dpy19l3
Tram1	8.44187e-06	0.160689	0.277	0.243	0.129372	ILC2	Tram1
Rmnd1	8.4587e-06	0.811231	0.025	0.015	0.12963	ILC2	Rmnd1
G3bp1	8.67257e-06	0.154202	0.284	0.249	0.132907	ILC2	G3bp1
Adar	8.82892e-06	0.443238	0.05	0.035	0.135303	ILC2	Adar
Tmtc4	9.15618e-06	0.534458	0.041	0.027	0.140318	ILC2	Tmtc4
Sco2	9.24624e-06	0.77209	0.023	0.013	0.141699	ILC2	Sco2
Nop56	9.24844e-06	0.210468	0.23	0.199	0.141732	ILC2	Nop56
Kctd9	9.34474e-06	0.772684	0.024	0.014	0.143208	ILC2	Kctd9
Vps13d	9.55544e-06	0.372146	0.081	0.062	0.146437	ILC2	Vps13d
AI413582	9.80429e-06	0.254631	0.127	0.103	0.150251	ILC2	AI413582
Uhmk1	9.81959e-06	0.345396	0.101	0.08	0.150485	ILC2	Uhmk1
Appl1	9.89787e-06	0.244982	0.199	0.17	0.151685	ILC2	Appl1
Pdxk	1.00337e-05	0.519703	0.038	0.026	0.153766	ILC2	Pdxk
Arl4c	1.03316e-05	0.492014	0.053	0.038	0.158332	ILC2	Arl4c
Cdv3	1.05522e-05	0.238415	0.183	0.155	0.161712	ILC2	Cdv3
Cryzl2	1.05941e-05	0.719244	0.023	0.014	0.162355	ILC2	Cryzl2
Cog6	1.07354e-05	0.624533	0.036	0.024	0.164519	ILC2	Cog6
Nsun2	1.08828e-05	0.326208	0.109	0.087	0.166778	ILC2	Nsun2
Ctsc	1.09328e-05	0.304746	0.135	0.111	0.167545	ILC2	Ctsc
Ankrd26	1.10676e-05	0.559629	0.037	0.025	0.16961	ILC2	Ankrd26
Eci2	1.12223e-05	0.506552	0.048	0.034	0.171981	ILC2	Eci2
Mrps30	1.12397e-05	0.412376	0.071	0.054	0.172249	ILC2	Mrps30
Zfp652	1.13562e-05	0.270411	0.156	0.13	0.174034	ILC2	Zfp652
Rel	1.15204e-05	0.291954	0.407	0.384	0.17655	ILC2	Rel
Ash1l	1.15255e-05	0.267788	0.14	0.115	0.176628	ILC2	Ash1l
Dcaf4	1.20064e-05	0.672017	0.026	0.016	0.183998	ILC2	Dcaf4
Amfr	1.21028e-05	0.259169	0.131	0.107	0.185476	ILC2	Amfr
Dusp23	1.25542e-05	0.669845	0.025	0.015	0.192393	ILC2	Dusp23
Acsl5	1.26125e-05	0.255429	0.142	0.117	0.193287	ILC2	Acsl5
Ern1	1.27158e-05	0.111355	0.441	0.402	0.19487	ILC2	Ern1
Ergic3	1.29259e-05	0.31197	0.124	0.101	0.198089	ILC2	Ergic3
Ccdc28b	1.31891e-05	1.06814	0.013	0.006	0.202123	ILC2	Ccdc28b
Slfn8	1.33554e-05	0.469208	0.04	0.027	0.204671	ILC2	Slfn8
Rnf7	1.34483e-05	0.199688	0.152	0.126	0.206095	ILC2	Rnf7
Il2	1.34612e-05	0.440589	0.045	0.031	0.206293	ILC2	Il2
Meis3	1.40626e-05	0.438566	0.053	0.038	0.215509	ILC2	Meis3
Marf1	1.43239e-05	0.390068	0.079	0.06	0.219513	ILC2	Marf1
Erg28	1.44306e-05	0.382315	0.072	0.055	0.221149	ILC2	Erg28
Ssr2	1.45248e-05	0.207823	0.184	0.155	0.222593	ILC2	Ssr2
Nsdhl	1.45817e-05	0.562971	0.042	0.029	0.223464	ILC2	Nsdhl
Snhg8	1.51534e-05	0.111457	0.373	0.335	0.232226	ILC2	Snhg8
Zfp827	1.52043e-05	0.805105	0.022	0.013	0.233005	ILC2	Zfp827
Ndufa11	1.57545e-05	0.199587	0.164	0.137	0.241437	ILC2	Ndufa11
Atxn7l1	1.57862e-05	0.328546	0.08	0.062	0.241923	ILC2	Atxn7l1
Nkrf	1.58254e-05	0.613964	0.027	0.017	0.242525	ILC2	Nkrf
Trim34a	1.58873e-05	0.600747	0.031	0.02	0.243472	ILC2	Trim34a
Zfp993	1.61372e-05	1.22014	0.01	0.004	0.247303	ILC2	Zfp993
Gm36738	1.629e-05	0.370628	0.08	0.061	0.249644	ILC2	Gm36738
Nefh	1.63331e-05	0.983103	0.012	0.006	0.250304	ILC2	Nefh
Tmem165	1.63873e-05	0.504913	0.046	0.032	0.251135	ILC2	Tmem165
Pmepa1	1.64348e-05	0.527031	0.034	0.022	0.251863	ILC2	Pmepa1
Birc2	1.64745e-05	0.238284	0.193	0.166	0.252472	ILC2	Birc2
Coq8a	1.66062e-05	0.378533	0.07	0.052	0.254491	ILC2	Coq8a
Hdhd5	1.66791e-05	0.444574	0.053	0.038	0.255607	ILC2	Hdhd5
Emc6	1.69387e-05	0.184219	0.2	0.171	0.259586	ILC2	Emc6
Klf7	1.71057e-05	0.21227	0.146	0.121	0.262145	ILC2	Klf7
Ahi1	1.72962e-05	0.555933	0.039	0.026	0.265065	ILC2	Ahi1
St7	1.7403e-05	0.492936	0.039	0.027	0.266701	ILC2	St7
Sav1	1.7617e-05	0.383342	0.07	0.053	0.269981	ILC2	Sav1
Slc45a4	1.79061e-05	0.538432	0.037	0.025	0.27441	ILC2	Slc45a4
Mtmr3	1.79212e-05	0.322472	0.096	0.075	0.274643	ILC2	Mtmr3
Sytl1	1.84472e-05	0.835058	0.016	0.009	0.282703	ILC2	Sytl1
Mkks	1.85924e-05	0.896528	0.013	0.006	0.284928	ILC2	Mkks
Naxe	1.91295e-05	0.289405	0.109	0.087	0.293159	ILC2	Naxe
Gm50431	1.93552e-05	0.559269	0.044	0.031	0.296619	ILC2	Gm50431
Usp11	1.95841e-05	0.649132	0.028	0.018	0.300127	ILC2	Usp11
Gng10	1.95908e-05	0.606634	0.031	0.02	0.300228	ILC2	Gng10
Pkig	2.03122e-05	0.559126	0.034	0.022	0.311285	ILC2	Pkig
Isg20	2.04433e-05	0.400972	0.052	0.037	0.313294	ILC2	Isg20
Glod4	2.11484e-05	0.253957	0.111	0.089	0.324099	ILC2	Glod4
Pes1	2.16006e-05	0.367581	0.079	0.061	0.331029	ILC2	Pes1
Nbas	2.16448e-05	0.512323	0.047	0.033	0.331707	ILC2	Nbas
Mcph1	2.24541e-05	0.530483	0.028	0.017	0.34411	ILC2	Mcph1
Grhpr	2.24782e-05	0.617735	0.03	0.019	0.344478	ILC2	Grhpr
Tmem14c	2.25849e-05	0.189032	0.216	0.186	0.346114	ILC2	Tmem14c
Elf4	2.33626e-05	0.417375	0.065	0.048	0.358032	ILC2	Elf4
Edrf1	2.47108e-05	0.729441	0.027	0.017	0.378693	ILC2	Edrf1
Med26	2.48685e-05	0.702743	0.023	0.014	0.38111	ILC2	Med26
Ice1	2.49188e-05	0.354444	0.081	0.062	0.381881	ILC2	Ice1
Gtf2i	2.53783e-05	0.245848	0.154	0.129	0.388922	ILC2	Gtf2i
Mrpl45	2.5907e-05	0.370168	0.064	0.048	0.397025	ILC2	Mrpl45
Med14	2.59623e-05	0.262155	0.137	0.114	0.397873	ILC2	Med14
Hsd17b10	2.59699e-05	0.3328	0.104	0.083	0.397988	ILC2	Hsd17b10
D130040H23Rik	2.82762e-05	0.812639	0.02	0.012	0.433333	ILC2	D130040H23Rik
Igbp1	2.83937e-05	0.245799	0.169	0.144	0.435134	ILC2	Igbp1
Pfdn4	2.92707e-05	0.294091	0.101	0.081	0.448573	ILC2	Pfdn4
Gnl3	2.94932e-05	0.261199	0.154	0.13	0.451983	ILC2	Gnl3
Gm1043	2.99089e-05	1.06342	0.013	0.007	0.458354	ILC2	Gm1043
Muc1	3.02185e-05	0.331628	0.076	0.059	0.463098	ILC2	Muc1
Tbcd	3.03987e-05	0.64036	0.027	0.017	0.46586	ILC2	Tbcd
Snrnp48	3.21581e-05	0.241936	0.136	0.112	0.492823	ILC2	Snrnp48
Utrn	3.22312e-05	0.160786	0.238	0.207	0.493943	ILC2	Utrn
Reps1	3.30933e-05	0.336452	0.101	0.081	0.507155	ILC2	Reps1
Slc38a9	3.38407e-05	0.584106	0.031	0.021	0.518608	ILC2	Slc38a9
Zfp263	3.43341e-05	0.487716	0.042	0.029	0.526171	ILC2	Zfp263
Ankrd10	3.44114e-05	0.427362	0.062	0.047	0.527355	ILC2	Ankrd10
Qars	3.52866e-05	0.32373	0.093	0.073	0.540767	ILC2	Qars
Letmd1	3.53001e-05	0.440473	0.052	0.038	0.540973	ILC2	Letmd1
Ccdc6	3.68409e-05	0.53617	0.04	0.027	0.564586	ILC2	Ccdc6
Smarcd1	3.80986e-05	0.524085	0.04	0.028	0.583861	ILC2	Smarcd1
Ints12	3.81518e-05	0.377423	0.098	0.078	0.584676	ILC2	Ints12
Trim35	3.89472e-05	0.566318	0.033	0.022	0.596867	ILC2	Trim35
Poglut1	3.92656e-05	0.716929	0.025	0.016	0.601745	ILC2	Poglut1
Ikbke	3.97461e-05	0.491606	0.044	0.031	0.609109	ILC2	Ikbke
Rab39	4.15312e-05	1.06226	0.011	0.005	0.636466	ILC2	Rab39
Trim30d	4.36006e-05	0.405241	0.049	0.036	0.668179	ILC2	Trim30d
Cat	4.37947e-05	0.405316	0.069	0.052	0.671154	ILC2	Cat
Tmem87a	4.46246e-05	0.335251	0.071	0.054	0.683872	ILC2	Tmem87a
G6pc3	4.46374e-05	0.443686	0.047	0.034	0.684068	ILC2	G6pc3
Ndufs4	4.47214e-05	0.167635	0.245	0.215	0.685355	ILC2	Ndufs4
Casc3	4.52066e-05	0.338258	0.093	0.074	0.692791	ILC2	Casc3
2610002M06Rik	4.55324e-05	0.559031	0.035	0.024	0.697784	ILC2	2610002M06Rik
G2e3	4.61363e-05	0.752364	0.02	0.012	0.707038	ILC2	G2e3
Suclg2	4.61413e-05	0.354358	0.086	0.068	0.707116	ILC2	Suclg2
Elavl1	4.68526e-05	0.148411	0.251	0.221	0.718016	ILC2	Elavl1
Polg	4.68833e-05	0.604908	0.029	0.019	0.718487	ILC2	Polg
Ppif	4.72507e-05	0.61906	0.036	0.025	0.724117	ILC2	Ppif
H13	4.77883e-05	0.115656	0.333	0.298	0.732356	ILC2	H13
Rbm12b1	4.80967e-05	0.983103	0.013	0.006	0.737082	ILC2	Rbm12b1
Rnf215	4.9872e-05	0.532087	0.034	0.023	0.764288	ILC2	Rnf215
Nolc1	5.01501e-05	0.230856	0.16	0.136	0.768551	ILC2	Nolc1
Ift80	5.06693e-05	0.577695	0.028	0.018	0.776508	ILC2	Ift80
Clcc1	5.16287e-05	0.306454	0.065	0.049	0.79121	ILC2	Clcc1
Ube2e1	5.21928e-05	0.223034	0.142	0.118	0.799855	ILC2	Ube2e1
Smim15	5.22566e-05	0.314577	0.1	0.08	0.800832	ILC2	Smim15
Atp5j	5.33859e-05	0.118317	0.439	0.406	0.818138	ILC2	Atp5j
Fam120a	5.34823e-05	0.350086	0.082	0.064	0.819616	ILC2	Fam120a
Pqlc3	5.37029e-05	0.571217	0.028	0.018	0.822998	ILC2	Pqlc3
Zxdc	5.61114e-05	0.542942	0.031	0.02	0.859907	ILC2	Zxdc
Zbtb8os	5.74692e-05	0.391129	0.071	0.054	0.880716	ILC2	Zbtb8os
Trio	5.87807e-05	0.262717	0.126	0.105	0.900814	ILC2	Trio
Camkk2	5.91284e-05	0.519703	0.045	0.032	0.906143	ILC2	Camkk2
Nepro	5.95462e-05	0.702012	0.023	0.014	0.912545	ILC2	Nepro
Dnmt1	5.99767e-05	0.362418	0.068	0.052	0.919142	ILC2	Dnmt1
Taf7	6.02299e-05	0.200473	0.189	0.163	0.923023	ILC2	Taf7
Ptbp2	6.17711e-05	0.411284	0.058	0.044	0.946642	ILC2	Ptbp2
Nfat5	6.18313e-05	0.325753	0.087	0.069	0.947565	ILC2	Nfat5
Fbxl14	6.21179e-05	0.41827	0.051	0.037	0.951956	ILC2	Fbxl14
Epn1	6.22252e-05	0.332934	0.104	0.085	0.953601	ILC2	Epn1
Klhdc1	6.23324e-05	1.00674	0.01	0.005	0.955244	ILC2	Klhdc1
Psph	6.27541e-05	0.292899	0.088	0.07	0.961707	ILC2	Psph
Miip	6.56074e-05	0.439456	0.051	0.038	1	ILC2	Miip
Tcof1	6.75493e-05	0.32037	0.094	0.075	1	ILC2	Tcof1
Ppargc1b	6.84812e-05	0.815301	0.015	0.008	1	ILC2	Ppargc1b
Polr1a	6.85731e-05	0.554933	0.036	0.025	1	ILC2	Polr1a
Fasn	6.91502e-05	0.521183	0.043	0.031	1	ILC2	Fasn
Arhgap18	6.96074e-05	0.244365	0.187	0.162	1	ILC2	Arhgap18
Maml2	7.05608e-05	0.346764	0.075	0.058	1	ILC2	Maml2
Fam172a	7.25745e-05	0.257205	0.13	0.109	1	ILC2	Fam172a
Alg5	7.26262e-05	0.320394	0.09	0.072	1	ILC2	Alg5
Pxmp4	7.31353e-05	0.418082	0.038	0.026	1	ILC2	Pxmp4
Ston2	7.366e-05	0.399519	0.056	0.042	1	ILC2	Ston2
Maco1	7.46495e-05	0.408904	0.046	0.034	1	ILC2	Maco1
Rasgrp2	7.53332e-05	0.467696	0.049	0.036	1	ILC2	Rasgrp2
Ap4b1	7.67087e-05	0.785476	0.016	0.009	1	ILC2	Ap4b1
Cdk2ap1	7.71498e-05	0.238511	0.129	0.108	1	ILC2	Cdk2ap1
Zbtb1	7.78741e-05	0.188233	0.183	0.158	1	ILC2	Zbtb1
Fxn	7.98699e-05	0.620681	0.024	0.015	1	ILC2	Fxn
Coq2	8.08553e-05	0.325468	0.11	0.09	1	ILC2	Coq2
Wdr43	8.15911e-05	0.229936	0.113	0.093	1	ILC2	Wdr43
Rgs10	8.22249e-05	0.1246	0.231	0.201	1	ILC2	Rgs10
Usp31	8.24796e-05	0.636905	0.021	0.013	1	ILC2	Usp31
Api5	8.30544e-05	0.262795	0.124	0.103	1	ILC2	Api5
Agk	8.49542e-05	0.534173	0.036	0.025	1	ILC2	Agk
Smdt1	8.70738e-05	0.141615	0.299	0.268	1	ILC2	Smdt1
Maged2	8.80672e-05	0.805105	0.014	0.008	1	ILC2	Maged2
Ptrh2	8.82578e-05	0.471681	0.038	0.026	1	ILC2	Ptrh2
Cct6a	8.98883e-05	0.163853	0.233	0.205	1	ILC2	Cct6a
Utp14b	9.0083e-05	1.09291	0.01	0.005	1	ILC2	Utp14b
Nt5c3	9.05005e-05	0.256622	0.114	0.093	1	ILC2	Nt5c3
Tmem106b	9.28707e-05	0.333632	0.061	0.047	1	ILC2	Tmem106b
Edem2	9.35304e-05	0.283801	0.114	0.094	1	ILC2	Edem2
Mrpl15	9.42286e-05	0.341623	0.081	0.064	1	ILC2	Mrpl15
Pebp1	9.46603e-05	0.190368	0.217	0.19	1	ILC2	Pebp1
Trim12c	9.49833e-05	0.462789	0.055	0.041	1	ILC2	Trim12c
Mrpl14	9.54044e-05	0.281872	0.113	0.093	1	ILC2	Mrpl14
Luc7l	9.57523e-05	0.179171	0.183	0.157	1	ILC2	Luc7l
Ccr9	9.67482e-05	0.173995	0.238	0.21	1	ILC2	Ccr9
Mettl2	9.92147e-05	0.661059	0.023	0.014	1	ILC2	Mettl2
Armcx3	9.92419e-05	0.398599	0.047	0.034	1	ILC2	Armcx3
Slc25a4	0.000100351	0.204527	0.159	0.135	1	ILC2	Slc25a4
Fam49b	0.000100684	0.116628	0.279	0.246	1	ILC2	Fam49b
Pcyt2	0.000100747	0.461151	0.047	0.035	1	ILC2	Pcyt2
Slirp	0.000101753	0.339694	0.082	0.065	1	ILC2	Slirp
Ctdnep1	0.000102254	0.191946	0.185	0.16	1	ILC2	Ctdnep1
Snapc1	0.000102303	0.337247	0.085	0.068	1	ILC2	Snapc1
Mboat7	0.000104063	0.43298	0.046	0.033	1	ILC2	Mboat7
Tmem223	0.000104834	0.358201	0.069	0.054	1	ILC2	Tmem223
Ydjc	0.000104954	0.881341	0.015	0.008	1	ILC2	Ydjc
Ddx20	0.000105054	0.565054	0.026	0.017	1	ILC2	Ddx20
Mdh2	0.0001061	0.1089	0.355	0.32	1	ILC2	Mdh2
Ncoa4	0.000106889	0.339076	0.1	0.081	1	ILC2	Ncoa4
Sv2c	0.000107241	0.774732	0.02	0.012	1	ILC2	Sv2c
Arv1	0.000107626	1.00214	0.01	0.005	1	ILC2	Arv1
Nlrc5	0.000109671	0.304348	0.074	0.058	1	ILC2	Nlrc5
Slc9a9	0.000113126	0.220143	0.101	0.082	1	ILC2	Slc9a9
Trappc1	0.00011521	0.341955	0.066	0.051	1	ILC2	Trappc1
Gtpbp2	0.000115943	0.280735	0.113	0.094	1	ILC2	Gtpbp2
Kctd3	0.000121347	0.928253	0.012	0.006	1	ILC2	Kctd3
Ntpcr	0.000123917	0.55106	0.034	0.024	1	ILC2	Ntpcr
Git1	0.000126012	0.479435	0.034	0.023	1	ILC2	Git1
Qtrt2	0.000126785	0.571615	0.025	0.016	1	ILC2	Qtrt2
Slc38a6	0.000127602	0.796644	0.018	0.01	1	ILC2	Slc38a6
1110051M20Rik	0.000132399	0.827473	0.014	0.008	1	ILC2	1110051M20Rik
Zc3h6	0.000132789	0.446357	0.032	0.022	1	ILC2	Zc3h6
Kcnip1	0.000133715	0.910287	0.014	0.008	1	ILC2	Kcnip1
Hmbox1	0.000134088	0.425171	0.05	0.037	1	ILC2	Hmbox1
Zkscan3	0.000134127	0.391343	0.061	0.046	1	ILC2	Zkscan3
Hgh1	0.000135437	0.925399	0.011	0.006	1	ILC2	Hgh1
Tubb4b	0.000135558	0.13374	0.258	0.229	1	ILC2	Tubb4b
Tmx2	0.000135683	0.334314	0.08	0.064	1	ILC2	Tmx2
Adat1	0.00013844	0.894902	0.012	0.007	1	ILC2	Adat1
Abhd18	0.000139416	0.854858	0.013	0.007	1	ILC2	Abhd18
Vti1a	0.00013973	0.283352	0.094	0.076	1	ILC2	Vti1a
Arhgap25	0.000141019	0.363101	0.067	0.052	1	ILC2	Arhgap25
Tshz3	0.000142753	0.53393	0.035	0.024	1	ILC2	Tshz3
Zfp386	0.000142987	0.389225	0.046	0.034	1	ILC2	Zfp386
Rbm26	0.000145377	0.207124	0.163	0.139	1	ILC2	Rbm26
Wdr1	0.00014543	0.166003	0.191	0.165	1	ILC2	Wdr1
Fer	0.000145715	1.04478	0.01	0.005	1	ILC2	Fer
Smg1	0.000148379	0.172371	0.216	0.19	1	ILC2	Smg1
Dcaf17	0.000148474	0.494176	0.033	0.023	1	ILC2	Dcaf17
Ift27	0.000151392	0.497353	0.047	0.034	1	ILC2	Ift27
Svbp	0.000151532	0.267812	0.09	0.073	1	ILC2	Svbp
Mrpl36	0.000155474	0.278287	0.095	0.077	1	ILC2	Mrpl36
Penk	0.000158891	1.60201	0.01	0.005	1	ILC2	Penk
Ptdss1	0.000159073	0.326034	0.071	0.056	1	ILC2	Ptdss1
Sbf1	0.000159852	0.4431	0.06	0.046	1	ILC2	Sbf1
Arhgef18	0.000159885	0.528981	0.041	0.029	1	ILC2	Arhgef18
Ap2m1	0.000163064	0.169082	0.199	0.173	1	ILC2	Ap2m1
Gab2	0.000163501	0.556668	0.031	0.021	1	ILC2	Gab2
Gatd1	0.000165437	0.356645	0.062	0.047	1	ILC2	Gatd1
Kin	0.000165986	0.234959	0.106	0.087	1	ILC2	Kin
Ubac1	0.000169146	0.487082	0.033	0.023	1	ILC2	Ubac1
Trub1	0.000171028	0.640917	0.024	0.016	1	ILC2	Trub1
Ammecr1	0.000171743	0.708244	0.016	0.009	1	ILC2	Ammecr1
Itpa	0.0001735	0.361098	0.056	0.043	1	ILC2	Itpa
Jpt2	0.000177088	0.805105	0.016	0.009	1	ILC2	Jpt2
Ssh1	0.000177812	0.363337	0.056	0.042	1	ILC2	Ssh1
Acad9	0.000180727	0.433335	0.037	0.026	1	ILC2	Acad9
Pld3	0.00018151	0.322091	0.074	0.058	1	ILC2	Pld3
Chmp2b	0.000186067	0.25652	0.088	0.071	1	ILC2	Chmp2b
Prkce	0.000186925	0.440589	0.051	0.038	1	ILC2	Prkce
Actr10	0.000187244	0.220759	0.157	0.135	1	ILC2	Actr10
Rps6kb1	0.00018772	0.182546	0.148	0.125	1	ILC2	Rps6kb1
Med6	0.000191668	0.370318	0.055	0.041	1	ILC2	Med6
Foxk1	0.000196706	0.380939	0.055	0.042	1	ILC2	Foxk1
Peli1	0.000198455	0.114695	0.304	0.274	1	ILC2	Peli1
Scaf4	0.000204586	0.4754	0.046	0.034	1	ILC2	Scaf4
Ap2b1	0.00020957	0.219464	0.147	0.125	1	ILC2	Ap2b1
Svil	0.00021019	0.300254	0.095	0.077	1	ILC2	Svil
Sik2	0.000211859	0.42167	0.047	0.035	1	ILC2	Sik2
Fam53b	0.00021321	0.737201	0.018	0.011	1	ILC2	Fam53b
Atp6v1e1	0.000215816	0.169822	0.207	0.182	1	ILC2	Atp6v1e1
Gbp8	0.000218316	0.21649	0.111	0.092	1	ILC2	Gbp8
Hist1h1c	0.000223013	0.117015	0.221	0.195	1	ILC2	Hist1h1c
Sap30l	0.000224688	0.296378	0.086	0.07	1	ILC2	Sap30l
Lats1	0.000229118	0.382022	0.079	0.063	1	ILC2	Lats1
Malt1	0.000229796	0.233298	0.128	0.108	1	ILC2	Malt1
Pwwp2b	0.000232238	0.678841	0.018	0.011	1	ILC2	Pwwp2b
Vapb	0.000232617	0.24711	0.107	0.089	1	ILC2	Vapb
Secisbp2	0.000232942	0.31244	0.074	0.058	1	ILC2	Secisbp2
Tbl1xr1	0.000232995	0.285816	0.086	0.069	1	ILC2	Tbl1xr1
Tasor2	0.000240231	0.289964	0.08	0.064	1	ILC2	Tasor2
Clptm1l	0.000241303	0.197077	0.174	0.151	1	ILC2	Clptm1l
Elob	0.000242243	0.104788	0.443	0.411	1	ILC2	Elob
Tmem214	0.000242483	0.539832	0.035	0.025	1	ILC2	Tmem214
Dennd6b	0.000242661	0.920582	0.012	0.006	1	ILC2	Dennd6b
Nup155	0.000242997	0.616286	0.025	0.017	1	ILC2	Nup155
Camsap1	0.000246708	0.577153	0.024	0.016	1	ILC2	Camsap1
Emc10	0.000249019	0.165556	0.186	0.161	1	ILC2	Emc10
Zfp236	0.000249049	0.353356	0.063	0.049	1	ILC2	Zfp236
Cnih4	0.000250179	0.245234	0.097	0.079	1	ILC2	Cnih4
[truncated: 7,166 more rows]

## Sheet: Table 7B. 28-week-old CD4 T DEG
	p_val	avg_log2FC	pct.1	pct.2	p_val_adj	cluster	gene
Ccl5	0	3.49666	0.589	0.242	0	CD4 Trm	Ccl5
Ms4a4b	0	1.74662	0.562	0.22	0	CD4 Trm	Ms4a4b
Trat1	3.11738e-280	1.98096	0.445	0.136	4.51553e-276	CD4 Trm	Trat1
Nkg7	1.67034e-246	1.36456	0.61	0.316	2.41949e-242	CD4 Trm	Nkg7
Ptpn22	3.59928e-207	0.82928	0.797	0.592	5.21355e-203	CD4 Trm	Ptpn22
Il12rb2	9.27932e-206	2.78567	0.279	0.057	1.34411e-201	CD4 Trm	Il12rb2
Xcl1	9.15022e-176	3.12179	0.286	0.08	1.32541e-171	CD4 Trm	Xcl1
Zfp36l2	5.17434e-160	0.99827	0.642	0.415	7.49503e-156	CD4 Trm	Zfp36l2
Btg1	1.30722e-153	0.448768	0.986	0.956	1.8935e-149	CD4 Trm	Btg1
Gimap4	1.78979e-153	0.755744	0.767	0.58	2.59252e-149	CD4 Trm	Gimap4
Gimap6	2.6409e-144	0.655429	0.816	0.653	3.82534e-140	CD4 Trm	Gimap6
Ptprc	2.90339e-143	0.489254	0.937	0.865	4.20556e-139	CD4 Trm	Ptprc
Slamf7	4.36836e-134	2.07687	0.227	0.059	6.32757e-130	CD4 Trm	Slamf7
Epsti1	3.09856e-130	1.29221	0.384	0.181	4.48826e-126	CD4 Trm	Epsti1
Gpr18	3.39912e-125	2.63064	0.183	0.037	4.92363e-121	CD4 Trm	Gpr18
Fasl	2.27198e-121	1.40398	0.306	0.122	3.29096e-117	CD4 Trm	Fasl
Il21r	2.10443e-110	0.792776	0.572	0.372	3.04827e-106	CD4 Trm	Il21r
Cd160	2.48245e-105	1.75926	0.233	0.081	3.59582e-101	CD4 Trm	Cd160
Ctsw	4.91988e-100	1.05504	0.39	0.21	7.12645e-96	CD4 Trm	Ctsw
Ifng	1.49321e-97	1.79068	0.242	0.093	2.16292e-93	CD4 Trm	Ifng
Ubac2	2.12824e-95	1.33743	0.292	0.133	3.08275e-91	CD4 Trm	Ubac2
Hmgb2	2.56085e-89	0.562455	0.767	0.642	3.70939e-85	CD4 Trm	Hmgb2
Gramd3	1.42218e-85	1.72852	0.242	0.105	2.06003e-81	CD4 Trm	Gramd3
Slfn2	2.19332e-83	1.06604	0.334	0.178	3.17702e-79	CD4 Trm	Slfn2
Neurl3	3.04197e-82	0.494705	0.812	0.719	4.40629e-78	CD4 Trm	Neurl3
Grap2	5.65717e-81	0.97521	0.386	0.228	8.19442e-77	CD4 Trm	Grap2
Tcf7	6.88163e-81	1.02276	0.34	0.184	9.96804e-77	CD4 Trm	Tcf7
Btg2	1.55544e-79	0.558715	0.744	0.595	2.25305e-75	CD4 Trm	Btg2
Fyb	4.35284e-77	0.540312	0.688	0.543	6.30508e-73	CD4 Trm	Fyb
Ubc	9.69593e-77	0.314587	0.979	0.959	1.40446e-72	CD4 Trm	Ubc
Vps37b	1.98379e-75	0.361441	0.918	0.855	2.87352e-71	CD4 Trm	Vps37b
Dapk2	2.49529e-75	2.32212	0.121	0.026	3.61443e-71	CD4 Trm	Dapk2
Gm8369	1.84707e-74	1.03823	0.324	0.177	2.67548e-70	CD4 Trm	Gm8369
Gzmk	2.009e-74	4.09649	0.082	0.007	2.91004e-70	CD4 Trm	Gzmk
Nabp1	8.1932e-73	0.539462	0.646	0.488	1.18679e-68	CD4 Trm	Nabp1
Themis	1.11666e-69	1.47101	0.187	0.073	1.61748e-65	CD4 Trm	Themis
Cd7	4.38829e-69	2.07057	0.161	0.057	6.35643e-65	CD4 Trm	Cd7
Arid5a	2.14689e-67	0.9315	0.324	0.183	3.10977e-63	CD4 Trm	Arid5a
Inpp1	5.98748e-66	1.29332	0.218	0.099	8.67287e-62	CD4 Trm	Inpp1
Cxcr3	7.06331e-66	0.95219	0.272	0.139	1.02312e-61	CD4 Trm	Cxcr3
Gimap7	2.39991e-65	0.718204	0.423	0.273	3.47627e-61	CD4 Trm	Gimap7
Stk17b	4.38715e-65	0.397933	0.854	0.773	6.35479e-61	CD4 Trm	Stk17b
Dtx1	6.27362e-65	0.942973	0.283	0.15	9.08734e-61	CD4 Trm	Dtx1
Gimap3	6.40854e-65	0.411518	0.814	0.724	9.28277e-61	CD4 Trm	Gimap3
Gtf2i	4.09346e-63	1.08606	0.249	0.125	5.92938e-59	CD4 Trm	Gtf2i
Dtx4	1.67473e-61	1.15824	0.22	0.104	2.42585e-57	CD4 Trm	Dtx4
Abcb1a	4.32647e-61	0.613121	0.52	0.379	6.2669e-57	CD4 Trm	Abcb1a
Ptger4	2.65453e-60	1.09418	0.239	0.12	3.84509e-56	CD4 Trm	Ptger4
Socs3	6.64465e-60	0.966755	0.297	0.169	9.62477e-56	CD4 Trm	Socs3
Tesc	6.87201e-57	1.28943	0.176	0.074	9.95411e-53	CD4 Trm	Tesc
Ikzf1	2.23495e-56	0.855526	0.308	0.181	3.23733e-52	CD4 Trm	Ikzf1
Tspan3	1.50392e-55	1.26332	0.182	0.081	2.17843e-51	CD4 Trm	Tspan3
Ccr5	4.71762e-54	1.08437	0.232	0.121	6.83347e-50	CD4 Trm	Ccr5
Tnfaip3	7.3216e-53	0.279269	0.955	0.932	1.06053e-48	CD4 Trm	Tnfaip3
Gm12840	2.00213e-52	0.898569	0.273	0.156	2.90008e-48	CD4 Trm	Gm12840
Klf3	1.61653e-51	1.0653	0.239	0.13	2.34154e-47	CD4 Trm	Klf3
Evi2a	1.71045e-49	0.884372	0.258	0.145	2.47759e-45	CD4 Trm	Evi2a
Pde3b	2.01026e-48	1.01175	0.208	0.107	2.91186e-44	CD4 Trm	Pde3b
Pnrc1	2.43612e-48	0.260718	0.953	0.923	3.52872e-44	CD4 Trm	Pnrc1
Gzma	2.48925e-48	0.904965	0.37	0.248	3.60568e-44	CD4 Trm	Gzma
Tcrg-C2	8.0601e-47	1.05199	0.209	0.109	1.16751e-42	CD4 Trm	Tcrg-C2
Serbp1	3.21538e-44	0.431871	0.684	0.591	4.65748e-40	CD4 Trm	Serbp1
Serpina3g	6.53389e-44	0.954603	0.235	0.134	9.46434e-40	CD4 Trm	Serpina3g
Pik3r1	8.75252e-44	0.595235	0.469	0.352	1.2678e-39	CD4 Trm	Pik3r1
Lpxn	1.90494e-43	0.56535	0.473	0.357	2.75931e-39	CD4 Trm	Lpxn
Apol7e	2.50154e-43	1.13637	0.172	0.084	3.62348e-39	CD4 Trm	Apol7e
Cd6	6.01456e-43	0.58763	0.43	0.312	8.71209e-39	CD4 Trm	Cd6
Dnajc15	2.96633e-42	0.80436	0.282	0.176	4.29673e-38	CD4 Trm	Dnajc15
Pdcd4	4.55816e-42	0.577568	0.446	0.332	6.6025e-38	CD4 Trm	Pdcd4
Bcl2l11	6.65815e-42	1.08856	0.185	0.096	9.64433e-38	CD4 Trm	Bcl2l11
St8sia4	4.08851e-41	0.700786	0.32	0.211	5.92221e-37	CD4 Trm	St8sia4
H2-Q7	9.5133e-41	0.233671	0.95	0.91	1.378e-36	CD4 Trm	H2-Q7
Atf4	1.53408e-40	0.440478	0.625	0.524	2.22212e-36	CD4 Trm	Atf4
B4galnt1	3.13576e-40	0.744609	0.287	0.183	4.54215e-36	CD4 Trm	B4galnt1
Cd4	8.93004e-40	0.535977	0.436	0.321	1.29352e-35	CD4 Trm	Cd4
Jaml	1.65177e-39	0.997539	0.183	0.096	2.39259e-35	CD4 Trm	Jaml
Litaf	1.93505e-39	0.760931	0.319	0.215	2.80292e-35	CD4 Trm	Litaf
Nr4a2	1.10906e-37	0.97435	0.281	0.185	1.60648e-33	CD4 Trm	Nr4a2
Itga1	1.21614e-37	1.58355	0.091	0.031	1.76157e-33	CD4 Trm	Itga1
Got1	1.65223e-37	0.50661	0.497	0.39	2.39326e-33	CD4 Trm	Got1
Rcbtb2	2.73018e-37	0.931939	0.239	0.147	3.95466e-33	CD4 Trm	Rcbtb2
Lck	5.61706e-37	0.402792	0.637	0.541	8.13632e-33	CD4 Trm	Lck
Sh2d2a	1.36339e-36	0.538269	0.562	0.473	1.97486e-32	CD4 Trm	Sh2d2a
Pip4k2a	1.56686e-36	0.938943	0.188	0.104	2.26959e-32	CD4 Trm	Pip4k2a
P2ry10	1.57447e-36	0.419497	0.644	0.558	2.28062e-32	CD4 Trm	P2ry10
Cd28	2.10738e-36	0.392605	0.545	0.427	3.05254e-32	CD4 Trm	Cd28
Epb41	6.36732e-36	0.642418	0.323	0.222	9.22306e-32	CD4 Trm	Epb41
Rnf138	1.04324e-35	0.706558	0.297	0.199	1.51114e-31	CD4 Trm	Rnf138
Hcst	1.06617e-35	0.468542	0.509	0.402	1.54434e-31	CD4 Trm	Hcst
Sytl3	1.11366e-35	0.538884	0.367	0.259	1.61313e-31	CD4 Trm	Sytl3
Wipf1	3.10401e-35	0.827579	0.26	0.168	4.49616e-31	CD4 Trm	Wipf1
Ms4a6b	3.97407e-35	0.541889	0.439	0.336	5.75644e-31	CD4 Trm	Ms4a6b
P2rx7	8.46611e-35	0.809196	0.208	0.122	1.22632e-30	CD4 Trm	P2rx7
Plcxd2	1.18528e-34	0.817088	0.234	0.145	1.71689e-30	CD4 Trm	Plcxd2
Rps16	1.29273e-34	0.147145	0.997	0.994	1.87252e-30	CD4 Trm	Rps16
Cd40lg	1.67813e-34	0.501795	0.348	0.24	2.43077e-30	CD4 Trm	Cd40lg
Rpl13a	2.02961e-34	0.368046	0.667	0.583	2.93988e-30	CD4 Trm	Rpl13a
Pde7a	3.66633e-34	0.72399	0.226	0.137	5.31067e-30	CD4 Trm	Pde7a
Bcl2	4.36771e-34	0.706966	0.272	0.177	6.32663e-30	CD4 Trm	Bcl2
Tcrg-C4	5.16124e-34	1.20106	0.12	0.054	7.47605e-30	CD4 Trm	Tcrg-C4
Riok1	5.3919e-34	0.841077	0.291	0.201	7.81017e-30	CD4 Trm	Riok1
Slfn1	5.17365e-33	1.73496	0.075	0.025	7.49403e-29	CD4 Trm	Slfn1
Gm20400	1.10781e-32	0.801234	0.221	0.136	1.60466e-28	CD4 Trm	Gm20400
Mbd2	1.71525e-32	0.465001	0.516	0.422	2.48454e-28	CD4 Trm	Mbd2
Prf1	2.49152e-32	1.29083	0.097	0.039	3.60896e-28	CD4 Trm	Prf1
Rnf19b	3.17068e-32	0.498442	0.439	0.338	4.59272e-28	CD4 Trm	Rnf19b
Lat	3.30456e-32	0.342847	0.651	0.559	4.78665e-28	CD4 Trm	Lat
Mcl1	4.33072e-32	0.517393	0.461	0.367	6.27305e-28	CD4 Trm	Mcl1
Mfsd6	4.76882e-32	1.07391	0.141	0.072	6.90764e-28	CD4 Trm	Mfsd6
Slc3a2	7.98228e-32	0.350877	0.712	0.644	1.15623e-27	CD4 Trm	Slc3a2
Smim3	1.24448e-31	1.11084	0.139	0.071	1.80263e-27	CD4 Trm	Smim3
Gdi2	1.63482e-31	0.505128	0.465	0.372	2.36803e-27	CD4 Trm	Gdi2
Gimap9	1.03778e-30	0.561755	0.324	0.228	1.50322e-26	CD4 Trm	Gimap9
Ccl4	1.04131e-30	2.66022	0.109	0.051	1.50834e-26	CD4 Trm	Ccl4
Pim2	1.46488e-30	1.04241	0.183	0.109	2.12188e-26	CD4 Trm	Pim2
Cbx4	2.57261e-30	0.646986	0.288	0.198	3.72642e-26	CD4 Trm	Cbx4
Dusp2	5.36516e-30	0.867453	0.219	0.139	7.77143e-26	CD4 Trm	Dusp2
B4galnt4	2.17205e-29	1.22293	0.107	0.049	3.14622e-25	CD4 Trm	B4galnt4
Ddx5	2.17618e-29	0.145712	0.997	0.996	3.1522e-25	CD4 Trm	Ddx5
Klrd1	2.58382e-29	2.39128	0.058	0.017	3.74266e-25	CD4 Trm	Klrd1
Acadl	2.93283e-29	0.660629	0.28	0.193	4.2482e-25	CD4 Trm	Acadl
Baiap3	4.66755e-29	1.44849	0.078	0.029	6.76094e-25	CD4 Trm	Baiap3
Abcb1b	5.35533e-29	0.704397	0.202	0.124	7.7572e-25	CD4 Trm	Abcb1b
Eif5	5.96116e-29	0.3608	0.592	0.503	8.63473e-25	CD4 Trm	Eif5
Gm14718	1.41615e-28	2.06423	0.052	0.013	2.05129e-24	CD4 Trm	Gm14718
Elmsan1	1.77238e-28	0.808937	0.19	0.115	2.5673e-24	CD4 Trm	Elmsan1
Pde4b	2.06945e-28	0.48758	0.394	0.299	2.99759e-24	CD4 Trm	Pde4b
Rpl12	2.48787e-28	0.178727	0.956	0.938	3.60368e-24	CD4 Trm	Rpl12
Gzmb	2.74817e-28	0.891613	0.33	0.246	3.98072e-24	CD4 Trm	Gzmb
Fyn	2.81174e-28	0.391722	0.519	0.422	4.0728e-24	CD4 Trm	Fyn
Apbb1ip	3.01184e-28	0.501126	0.391	0.3	4.36266e-24	CD4 Trm	Apbb1ip
Evl	3.46184e-28	0.700138	0.222	0.142	5.01448e-24	CD4 Trm	Evl
Dennd2d	3.91462e-28	1.1143	0.114	0.055	5.67033e-24	CD4 Trm	Dennd2d
Mxd1	4.76638e-28	0.511303	0.501	0.42	6.90409e-24	CD4 Trm	Mxd1
Srsf3	1.42001e-27	0.333918	0.629	0.548	2.05689e-23	CD4 Trm	Srsf3
Serpinb6b	1.68528e-27	0.515747	0.393	0.301	2.44113e-23	CD4 Trm	Serpinb6b
Apol7b	1.69535e-27	0.905899	0.136	0.073	2.45571e-23	CD4 Trm	Apol7b
Cage1	1.94591e-27	1.25129	0.106	0.051	2.81865e-23	CD4 Trm	Cage1
Crot	3.1065e-27	0.878112	0.166	0.097	4.49977e-23	CD4 Trm	Crot
Tgfbr2	3.51651e-27	0.58481	0.286	0.2	5.09366e-23	CD4 Trm	Tgfbr2
Abi3	4.42143e-27	0.789254	0.187	0.115	6.40443e-23	CD4 Trm	Abi3
Gm47015	6.24634e-27	0.966331	0.132	0.071	9.04783e-23	CD4 Trm	Gm47015
Il18r1	1.14514e-26	0.605578	0.389	0.304	1.65873e-22	CD4 Trm	Il18r1
Ppp3cc	1.29025e-26	0.835557	0.163	0.096	1.86892e-22	CD4 Trm	Ppp3cc
Gm48228	2.1871e-26	0.816376	0.17	0.102	3.16802e-22	CD4 Trm	Gm48228
Rps11	9.98389e-26	0.162689	0.988	0.979	1.44617e-21	CD4 Trm	Rps11
Lilr4b	2.17165e-25	0.330851	0.562	0.463	3.14564e-21	CD4 Trm	Lilr4b
Gpr171	2.33689e-25	0.68487	0.238	0.162	3.38499e-21	CD4 Trm	Gpr171
Sp100	3.56241e-25	0.54576	0.308	0.226	5.16015e-21	CD4 Trm	Sp100
Snhg12	3.61435e-25	0.559484	0.328	0.245	5.23539e-21	CD4 Trm	Snhg12
Tbx21	3.8996e-25	1.11908	0.097	0.046	5.64857e-21	CD4 Trm	Tbx21
Cd96	7.23368e-25	0.489801	0.356	0.27	1.0478e-20	CD4 Trm	Cd96
Prag1	1.60374e-24	1.5028	0.065	0.024	2.32302e-20	CD4 Trm	Prag1
Susd3	2.64099e-24	0.823794	0.172	0.106	3.82547e-20	CD4 Trm	Susd3
Mndal	2.84145e-24	0.373051	0.512	0.425	4.11585e-20	CD4 Trm	Mndal
Eif4a2	4.52682e-24	0.351162	0.564	0.484	6.5571e-20	CD4 Trm	Eif4a2
Orai1	7.32132e-24	0.350733	0.547	0.463	1.06049e-19	CD4 Trm	Orai1
Tpst2	7.45429e-24	0.459799	0.404	0.32	1.07975e-19	CD4 Trm	Tpst2
Ubb	1.40416e-23	0.120614	1	1	2.03392e-19	CD4 Trm	Ubb
Fam241a	1.42785e-23	1.2706	0.087	0.04	2.06824e-19	CD4 Trm	Fam241a
St8sia1	1.59516e-23	1.49349	0.063	0.023	2.31058e-19	CD4 Trm	St8sia1
H2-Q4	1.94553e-23	0.332371	0.627	0.561	2.81809e-19	CD4 Trm	H2-Q4
Pmepa1	2.41918e-23	0.749015	0.201	0.132	3.50418e-19	CD4 Trm	Pmepa1
Ddit3	2.69786e-23	0.772423	0.179	0.114	3.90784e-19	CD4 Trm	Ddit3
Thada	2.96722e-23	0.776583	0.146	0.085	4.29801e-19	CD4 Trm	Thada
Gm2682	6.12493e-23	1.73414	0.049	0.015	8.87196e-19	CD4 Trm	Gm2682
Pik3r5	7.71525e-23	0.785318	0.156	0.094	1.11755e-18	CD4 Trm	Pik3r5
Rnf19a	8.50831e-23	0.715608	0.183	0.117	1.23243e-18	CD4 Trm	Rnf19a
Pik3cd	1.02943e-22	0.623202	0.224	0.153	1.49113e-18	CD4 Trm	Pik3cd
Jchain	1.14681e-22	0.357836	0.793	0.743	1.66116e-18	CD4 Trm	Jchain
Trbc2	2.04131e-22	0.223024	0.855	0.799	2.95684e-18	CD4 Trm	Trbc2
Clta	2.22553e-22	0.38602	0.498	0.42	3.22368e-18	CD4 Trm	Clta
Igkc	7.6101e-22	0.335379	0.995	0.993	1.10232e-17	CD4 Trm	Igkc
Tnfrsf1a	8.97484e-22	0.910986	0.12	0.067	1.30001e-17	CD4 Trm	Tnfrsf1a
Snhg1	9.20231e-22	0.485537	0.303	0.225	1.33295e-17	CD4 Trm	Snhg1
Itk	1.40626e-21	0.28703	0.622	0.554	2.03697e-17	CD4 Trm	Itk
Furin	1.58935e-21	0.458473	0.515	0.445	2.30218e-17	CD4 Trm	Furin
Arrb2	1.79778e-21	0.515423	0.297	0.222	2.60409e-17	CD4 Trm	Arrb2
Klrb1c	2.28259e-21	1.61065	0.057	0.021	3.30634e-17	CD4 Trm	Klrb1c
Spn	2.56856e-21	0.53844	0.268	0.194	3.72055e-17	CD4 Trm	Spn
Ubald2	3.02346e-21	0.254029	0.806	0.766	4.37949e-17	CD4 Trm	Ubald2
5430416N02Rik	4.11166e-21	0.872699	0.155	0.097	5.95574e-17	CD4 Trm	5430416N02Rik
Rsrp1	4.43169e-21	0.45267	0.37	0.292	6.4193e-17	CD4 Trm	Rsrp1
Sap30	5.45853e-21	1.02154	0.106	0.057	7.90668e-17	CD4 Trm	Sap30
Txnip	1.03546e-20	0.506206	0.293	0.219	1.49986e-16	CD4 Trm	Txnip
Depdc5	1.26435e-20	0.784078	0.135	0.081	1.83141e-16	CD4 Trm	Depdc5
Uba52	3.35012e-20	0.177546	0.88	0.842	4.85265e-16	CD4 Trm	Uba52
Prkacb	4.00221e-20	0.580158	0.228	0.161	5.7972e-16	CD4 Trm	Prkacb
Plk3	1.65616e-19	0.493184	0.266	0.195	2.39895e-15	CD4 Trm	Plk3
Rps27	1.74613e-19	0.104344	0.997	0.993	2.52927e-15	CD4 Trm	Rps27
Hsp90aa1	1.93873e-19	0.345676	0.706	0.651	2.80825e-15	CD4 Trm	Hsp90aa1
Mctp2	1.94316e-19	1.57813	0.046	0.015	2.81466e-15	CD4 Trm	Mctp2
Klre1	2.76784e-19	3.19299	0.029	0.006	4.00921e-15	CD4 Trm	Klre1
Galnt9	2.86748e-19	2.05333	0.035	0.009	4.15354e-15	CD4 Trm	Galnt9
Nod1	3.65959e-19	2.42853	0.027	0.005	5.30091e-15	CD4 Trm	Nod1
Iqgap1	4.00114e-19	0.377106	0.437	0.362	5.79565e-15	CD4 Trm	Iqgap1
Agfg1	4.27732e-19	0.482811	0.272	0.202	6.19569e-15	CD4 Trm	Agfg1
Sugt1	5.4066e-19	0.494054	0.26	0.191	7.83146e-15	CD4 Trm	Sugt1
Nab1	5.71447e-19	0.456884	0.333	0.261	8.27741e-15	CD4 Trm	Nab1
Tagap	8.1601e-19	0.844605	0.128	0.078	1.18199e-14	CD4 Trm	Tagap
Ehd3	8.74651e-19	1.06142	0.076	0.037	1.26693e-14	CD4 Trm	Ehd3
Nlk	1.07432e-18	0.746389	0.127	0.076	1.55615e-14	CD4 Trm	Nlk
Rpa2	1.15742e-18	1.12091	0.072	0.034	1.67653e-14	CD4 Trm	Rpa2
Igha	1.24285e-18	0.304713	0.975	0.97	1.80027e-14	CD4 Trm	Igha
Ptpn1	1.44455e-18	0.403855	0.361	0.288	2.09243e-14	CD4 Trm	Ptpn1
Soat2	1.60175e-18	1.67246	0.039	0.012	2.32014e-14	CD4 Trm	Soat2
Gm20069	2.14828e-18	0.86316	0.108	0.062	3.11178e-14	CD4 Trm	Gm20069
Rgs1	2.4583e-18	0.351289	0.776	0.736	3.56085e-14	CD4 Trm	Rgs1
Snhg8	3.86953e-18	0.353897	0.401	0.325	5.60501e-14	CD4 Trm	Snhg8
Bicdl1	4.16529e-18	1.56613	0.043	0.015	6.03342e-14	CD4 Trm	Bicdl1
Nlrc5	4.34609e-18	0.65477	0.161	0.106	6.29532e-14	CD4 Trm	Nlrc5
Gsr	4.36812e-18	0.616426	0.21	0.149	6.32722e-14	CD4 Trm	Gsr
Sgtb	4.42662e-18	0.872838	0.12	0.072	6.41197e-14	CD4 Trm	Sgtb
Cyp51	4.47839e-18	0.54356	0.262	0.197	6.48695e-14	CD4 Trm	Cyp51
Cipc	4.87113e-18	0.746759	0.122	0.073	7.05583e-14	CD4 Trm	Cipc
H3f3b	5.19359e-18	0.102803	0.997	0.993	7.52291e-14	CD4 Trm	H3f3b
Atp5md	6.39912e-18	0.217331	0.671	0.597	9.26913e-14	CD4 Trm	Atp5md
Serpinb9	6.83422e-18	0.557471	0.3	0.236	9.89937e-14	CD4 Trm	Serpinb9
Cd226	7.53394e-18	0.486689	0.229	0.165	1.09129e-13	CD4 Trm	Cd226
Ubash3a	7.92318e-18	0.509461	0.239	0.174	1.14767e-13	CD4 Trm	Ubash3a
Fam49a	1.15742e-17	0.957633	0.074	0.036	1.67652e-13	CD4 Trm	Fam49a
Hspa1a	1.31723e-17	2.13824	0.072	0.036	1.908e-13	CD4 Trm	Hspa1a
Insig1	2.04264e-17	0.563893	0.212	0.152	2.95877e-13	CD4 Trm	Insig1
Osgin1	3.74e-17	0.902294	0.103	0.059	5.41738e-13	CD4 Trm	Osgin1
Rplp0	4.02757e-17	0.112678	0.994	0.99	5.83393e-13	CD4 Trm	Rplp0
Ets1	4.54741e-17	0.215562	0.754	0.712	6.58692e-13	CD4 Trm	Ets1
Rnf166	6.71796e-17	0.433454	0.32	0.253	9.73096e-13	CD4 Trm	Rnf166
Il18rap	7.51522e-17	0.641339	0.196	0.14	1.08858e-12	CD4 Trm	Il18rap
Cir1	1.19167e-16	0.542688	0.218	0.159	1.72614e-12	CD4 Trm	Cir1
Ablim1	1.54499e-16	0.354594	0.402	0.332	2.23793e-12	CD4 Trm	Ablim1
Gm29719	1.58534e-16	1.72691	0.034	0.01	2.29636e-12	CD4 Trm	Gm29719
Efhd2	1.70853e-16	0.474056	0.265	0.202	2.47481e-12	CD4 Trm	Efhd2
Trerf1	1.7251e-16	0.847397	0.108	0.064	2.4988e-12	CD4 Trm	Trerf1
Il21	2.07221e-16	2.29097	0.026	0.005	3.00159e-12	CD4 Trm	Il21
Rgs3	2.33736e-16	1.08072	0.073	0.037	3.38567e-12	CD4 Trm	Rgs3
Ifi208	3.28926e-16	1.31767	0.049	0.02	4.76449e-12	CD4 Trm	Ifi208
Calhm6	4.20937e-16	1.58575	0.038	0.013	6.09728e-12	CD4 Trm	Calhm6
Gm33104	4.38984e-16	0.64383	0.154	0.103	6.35869e-12	CD4 Trm	Gm33104
Il1rl2	4.99548e-16	1.72399	0.034	0.011	7.23596e-12	CD4 Trm	Il1rl2
Ldlr	5.33014e-16	0.993127	0.081	0.044	7.72071e-12	CD4 Trm	Ldlr
Dnajb6	5.38137e-16	0.253234	0.585	0.519	7.79491e-12	CD4 Trm	Dnajb6
Pag1	5.62386e-16	0.877122	0.09	0.051	8.14616e-12	CD4 Trm	Pag1
Sp110	1.00233e-15	0.498647	0.244	0.184	1.45188e-11	CD4 Trm	Sp110
Fam204a	1.04417e-15	0.580791	0.166	0.114	1.51248e-11	CD4 Trm	Fam204a
Rac2	1.23889e-15	0.189647	0.784	0.743	1.79454e-11	CD4 Trm	Rac2
Sntb2	1.69855e-15	0.93801	0.07	0.036	2.46035e-11	CD4 Trm	Sntb2
Thy1	1.76233e-15	0.159912	0.561	0.474	2.55273e-11	CD4 Trm	Thy1
Gm5106	1.79077e-15	1.04907	0.067	0.034	2.59393e-11	CD4 Trm	Gm5106
Bcl2a1d	1.97675e-15	0.176487	0.689	0.603	2.86332e-11	CD4 Trm	Bcl2a1d
Tnfsf8	1.99278e-15	0.351944	0.202	0.145	2.88654e-11	CD4 Trm	Tnfsf8
Fam78a	2.19838e-15	1.51403	0.041	0.015	3.18436e-11	CD4 Trm	Fam78a
Casp1	3.52703e-15	0.598194	0.154	0.104	5.1089e-11	CD4 Trm	Casp1
D8Ertd738e	3.58667e-15	0.303444	0.504	0.441	5.19529e-11	CD4 Trm	D8Ertd738e
5033430I15Rik	3.78844e-15	0.931514	0.084	0.047	5.48755e-11	CD4 Trm	5033430I15Rik
Stk26	4.31406e-15	0.710236	0.121	0.077	6.24892e-11	CD4 Trm	Stk26
Ier2	4.73333e-15	0.248227	0.532	0.458	6.85622e-11	CD4 Trm	Ier2
Arrdc3	5.05855e-15	0.846489	0.095	0.055	7.32731e-11	CD4 Trm	Arrdc3
Twf2	6.66814e-15	0.596024	0.162	0.112	9.65881e-11	CD4 Trm	Twf2
Sh2d3c	6.78475e-15	1.32828	0.046	0.019	9.82772e-11	CD4 Trm	Sh2d3c
Cysltr2	6.81889e-15	0.524232	0.203	0.149	9.87717e-11	CD4 Trm	Cysltr2
Dbf4	6.91681e-15	0.729322	0.114	0.071	1.0019e-10	CD4 Trm	Dbf4
Atp8a2	7.38206e-15	0.723431	0.096	0.057	1.06929e-10	CD4 Trm	Atp8a2
Rpl8	7.59083e-15	0.131902	0.929	0.906	1.09953e-10	CD4 Trm	Rpl8
Etv3	8.15924e-15	0.510623	0.214	0.159	1.18187e-10	CD4 Trm	Etv3
1810041H14Rik	1.31411e-14	1.98657	0.026	0.007	1.90349e-10	CD4 Trm	1810041H14Rik
Idi1	1.32219e-14	0.512499	0.192	0.138	1.91519e-10	CD4 Trm	Idi1
Sqle	1.39776e-14	0.799541	0.104	0.064	2.02465e-10	CD4 Trm	Sqle
Plcl2	2.08981e-14	0.596197	0.155	0.107	3.02709e-10	CD4 Trm	Plcl2
Klra9	2.09425e-14	6.11208	0.013	0	3.03352e-10	CD4 Trm	Klra9
Card6	4.16548e-14	1.05381	0.06	0.03	6.0337e-10	CD4 Trm	Card6
Lrrc8d	4.27317e-14	0.626	0.153	0.106	6.18969e-10	CD4 Trm	Lrrc8d
H2afy	4.45671e-14	0.263906	0.493	0.43	6.45554e-10	CD4 Trm	H2afy
Rassf2	4.73273e-14	0.997008	0.067	0.036	6.85536e-10	CD4 Trm	Rassf2
Gm15472	5.02947e-14	1.03423	0.062	0.032	7.28519e-10	CD4 Trm	Gm15472
Dock10	6.32286e-14	0.265115	0.494	0.431	9.15866e-10	CD4 Trm	Dock10
Mrpl9	6.60806e-14	0.532331	0.184	0.133	9.57178e-10	CD4 Trm	Mrpl9
Chn2	6.6388e-14	0.612214	0.122	0.079	9.6163e-10	CD4 Trm	Chn2
Shld1	1.25915e-13	0.717903	0.117	0.076	1.82388e-09	CD4 Trm	Shld1
Rnf125	1.45484e-13	0.268922	0.523	0.464	2.10733e-09	CD4 Trm	Rnf125
Gimap1	2.13385e-13	0.356987	0.321	0.261	3.09089e-09	CD4 Trm	Gimap1
Blm	2.25422e-13	0.980958	0.064	0.034	3.26523e-09	CD4 Trm	Blm
Plac8	2.53436e-13	0.753355	0.191	0.143	3.67102e-09	CD4 Trm	Plac8
1700025G04Rik	2.71407e-13	2.19662	0.019	0.004	3.93133e-09	CD4 Trm	1700025G04Rik
Ncf1	3.12532e-13	1.66644	0.029	0.009	4.52703e-09	CD4 Trm	Ncf1
Hvcn1	3.24837e-13	0.766199	0.093	0.057	4.70527e-09	CD4 Trm	Hvcn1
2025-09-01	3.3703e-13	0.248726	0.542	0.48	4.88188e-09	CD4 Trm	2025-09-01
Hspa1b	3.63976e-13	1.76223	0.044	0.02	5.27219e-09	CD4 Trm	Hspa1b
Egr1	5.12542e-13	0.771802	0.185	0.136	7.42418e-09	CD4 Trm	Egr1
Serpina3f	6.16295e-13	1.11775	0.053	0.026	8.92704e-09	CD4 Trm	Serpina3f
Lmnb1	6.51834e-13	0.388697	0.31	0.253	9.44181e-09	CD4 Trm	Lmnb1
Heatr9	7.85437e-13	4.79348	0.011	0	1.13771e-08	CD4 Trm	Heatr9
Sesn3	8.21991e-13	0.448406	0.204	0.153	1.19065e-08	CD4 Trm	Sesn3
Tgfbr3	9.18002e-13	1.64004	0.028	0.009	1.32973e-08	CD4 Trm	Tgfbr3
Rps29	9.67827e-13	0.106002	0.978	0.97	1.4019e-08	CD4 Trm	Rps29
Ak2	1.14146e-12	0.411015	0.234	0.18	1.6534e-08	CD4 Trm	Ak2
Abi1	1.18078e-12	0.343272	0.377	0.32	1.71035e-08	CD4 Trm	Abi1
Pdxk	1.29106e-12	0.772765	0.072	0.041	1.8701e-08	CD4 Trm	Pdxk
Ifi206	1.45019e-12	0.886584	0.072	0.041	2.10061e-08	CD4 Trm	Ifi206
Hpcal1	1.5164e-12	0.455981	0.207	0.157	2.19651e-08	CD4 Trm	Hpcal1
Usp48	1.70131e-12	0.588372	0.134	0.092	2.46435e-08	CD4 Trm	Usp48
Gtf2b	2.28675e-12	0.331621	0.352	0.294	3.31235e-08	CD4 Trm	Gtf2b
Sit1	3.28657e-12	0.491236	0.227	0.176	4.7606e-08	CD4 Trm	Sit1
Mir142hg	3.61829e-12	0.263664	0.455	0.396	5.24109e-08	CD4 Trm	Mir142hg
Rflnb	4.60273e-12	0.945128	0.065	0.036	6.66705e-08	CD4 Trm	Rflnb
AI854703	4.60442e-12	0.974529	0.055	0.028	6.6695e-08	CD4 Trm	AI854703
Dgka	4.67818e-12	0.456519	0.201	0.153	6.77635e-08	CD4 Trm	Dgka
Cytip	4.74401e-12	0.135766	0.836	0.801	6.87169e-08	CD4 Trm	Cytip
Bcl11b	4.91597e-12	0.335848	0.307	0.25	7.12079e-08	CD4 Trm	Bcl11b
Ssbp2	5.10389e-12	0.702131	0.092	0.058	7.39299e-08	CD4 Trm	Ssbp2
Slamf1	5.62738e-12	0.46488	0.196	0.148	8.15126e-08	CD4 Trm	Slamf1
Cd200r4	6.34024e-12	0.791448	0.072	0.041	9.18384e-08	CD4 Trm	Cd200r4
Spsb1	6.69354e-12	0.944893	0.053	0.027	9.69559e-08	CD4 Trm	Spsb1
Cdk5r1	7.2995e-12	1.13804	0.045	0.022	1.05733e-07	CD4 Trm	Cdk5r1
Nebl	1.31158e-11	0.619094	0.097	0.062	1.89982e-07	CD4 Trm	Nebl
Pstpip1	1.69769e-11	0.492178	0.181	0.136	2.45911e-07	CD4 Trm	Pstpip1
Gm29243	1.81557e-11	0.900729	0.055	0.029	2.62985e-07	CD4 Trm	Gm29243
Smap1	1.9317e-11	0.338829	0.327	0.273	2.79806e-07	CD4 Trm	Smap1
St6galnac2	2.24697e-11	1.16031	0.037	0.016	3.25474e-07	CD4 Trm	St6galnac2
Il16	2.92075e-11	0.569403	0.149	0.107	4.23071e-07	CD4 Trm	Il16
Ezh1	3.18184e-11	0.542673	0.142	0.101	4.60889e-07	CD4 Trm	Ezh1
Kmt2e	4.25397e-11	0.274764	0.46	0.408	6.16187e-07	CD4 Trm	Kmt2e
Cd69	4.61561e-11	0.245781	0.606	0.559	6.68571e-07	CD4 Trm	Cd69
Frat2	4.7723e-11	0.509452	0.141	0.101	6.91268e-07	CD4 Trm	Frat2
Lax1	6.97133e-11	0.732166	0.087	0.055	1.0098e-06	CD4 Trm	Lax1
Tnf	7.84727e-11	0.625391	0.089	0.056	1.13668e-06	CD4 Trm	Tnf
Gpc1	8.30365e-11	1.36939	0.028	0.011	1.20278e-06	CD4 Trm	Gpc1
Sipa1	8.61929e-11	0.499159	0.152	0.111	1.2485e-06	CD4 Trm	Sipa1
H2afj	8.67854e-11	0.389417	0.25	0.201	1.25709e-06	CD4 Trm	H2afj
Cep290	8.79792e-11	0.736501	0.078	0.048	1.27438e-06	CD4 Trm	Cep290
Pltp	9.11377e-11	1.40453	0.03	0.012	1.32013e-06	CD4 Trm	Pltp
Kpna1	1.15896e-10	0.388728	0.253	0.204	1.67875e-06	CD4 Trm	Kpna1
Gm27194	1.31999e-10	1.86149	0.02	0.006	1.91201e-06	CD4 Trm	Gm27194
Insl6	1.36474e-10	0.758535	0.074	0.045	1.97682e-06	CD4 Trm	Insl6
Abhd8	1.4915e-10	0.642472	0.102	0.069	2.16044e-06	CD4 Trm	Abhd8
Oat	1.56168e-10	0.4564	0.19	0.146	2.26209e-06	CD4 Trm	Oat
Tapbpl	1.72757e-10	0.432896	0.182	0.139	2.50238e-06	CD4 Trm	Tapbpl
Golm1	1.78522e-10	0.61601	0.097	0.064	2.58588e-06	CD4 Trm	Golm1
Csnk1e	2.55231e-10	0.678106	0.091	0.059	3.69702e-06	CD4 Trm	Csnk1e
Adam19	2.72949e-10	0.449653	0.165	0.124	3.95367e-06	CD4 Trm	Adam19
Smchd1	2.9586e-10	0.396317	0.258	0.21	4.28553e-06	CD4 Trm	Smchd1
2025-09-06	3.22128e-10	0.284635	0.309	0.256	4.66602e-06	CD4 Trm	2025-09-06
Gbp4	3.3388e-10	0.46006	0.164	0.123	4.83625e-06	CD4 Trm	Gbp4
H2-T22	3.71474e-10	0.324497	0.281	0.231	5.38081e-06	CD4 Trm	H2-T22
AW112010	3.91552e-10	0.160435	0.764	0.733	5.67163e-06	CD4 Trm	AW112010
Sema6d	4.02572e-10	2.08389	0.015	0.003	5.83126e-06	CD4 Trm	Sema6d
Rab8a	4.10993e-10	0.323745	0.285	0.235	5.95324e-06	CD4 Trm	Rab8a
Trgv2	4.33457e-10	0.906274	0.047	0.025	6.27862e-06	CD4 Trm	Trgv2
Trip4	4.51622e-10	0.687567	0.085	0.055	6.54175e-06	CD4 Trm	Trip4
Slc20a1	4.73288e-10	0.585176	0.107	0.074	6.85558e-06	CD4 Trm	Slc20a1
Dnajb4	4.78398e-10	0.657112	0.105	0.072	6.92959e-06	CD4 Trm	Dnajb4
Casp4	5.54254e-10	0.333209	0.235	0.187	8.02837e-06	CD4 Trm	Casp4
Msmo1	5.64344e-10	0.475695	0.121	0.085	8.17452e-06	CD4 Trm	Msmo1
Snhg3	5.80235e-10	0.576979	0.108	0.074	8.40471e-06	CD4 Trm	Snhg3
Baiap2	6.4271e-10	0.749294	0.073	0.045	9.30966e-06	CD4 Trm	Baiap2
Rras2	7.08732e-10	0.645391	0.079	0.05	1.0266e-05	CD4 Trm	Rras2
Pitpnc1	7.93016e-10	0.41376	0.2	0.157	1.14868e-05	CD4 Trm	Pitpnc1
Gbp8	9.61196e-10	0.44574	0.149	0.111	1.39229e-05	CD4 Trm	Gbp8
Gpr34	9.80434e-10	0.641002	0.105	0.073	1.42016e-05	CD4 Trm	Gpr34
Plscr1	1.10141e-09	0.284411	0.281	0.232	1.59539e-05	CD4 Trm	Plscr1
Gm28053	1.19181e-09	0.536187	0.101	0.069	1.72634e-05	CD4 Trm	Gm28053
BE692007	1.19862e-09	0.737751	0.065	0.039	1.73619e-05	CD4 Trm	BE692007
Nmnat2	1.25671e-09	1.26751	0.031	0.014	1.82034e-05	CD4 Trm	Nmnat2
Maml2	1.42774e-09	0.623399	0.09	0.06	2.06809e-05	CD4 Trm	Maml2
Srsf2	1.81872e-09	0.234863	0.476	0.425	2.63442e-05	CD4 Trm	Srsf2
Dnajb1	1.96096e-09	0.734645	0.193	0.152	2.84045e-05	CD4 Trm	Dnajb1
Cd8a	2.16122e-09	1.29806	0.049	0.027	3.13053e-05	CD4 Trm	Cd8a
Fos	2.23798e-09	0.12607	0.875	0.849	3.24172e-05	CD4 Trm	Fos
Ndufb1-ps	2.27052e-09	0.337071	0.331	0.286	3.28885e-05	CD4 Trm	Ndufb1-ps
Socs1	2.53809e-09	0.334058	0.222	0.178	3.67642e-05	CD4 Trm	Socs1
Gbp9	2.61155e-09	0.519718	0.113	0.079	3.78283e-05	CD4 Trm	Gbp9
Clec2i	2.69409e-09	0.589689	0.089	0.059	3.90239e-05	CD4 Trm	Clec2i
Nfe2l2	2.77058e-09	0.41584	0.175	0.135	4.01319e-05	CD4 Trm	Nfe2l2
Klrc2	2.88453e-09	2.03859	0.016	0.004	4.17823e-05	CD4 Trm	Klrc2
Sorl1	2.90522e-09	0.31675	0.218	0.173	4.20821e-05	CD4 Trm	Sorl1
Nsmaf	2.90801e-09	0.393469	0.191	0.149	4.21225e-05	CD4 Trm	Nsmaf
Morc1	3.00519e-09	1.15521	0.03	0.013	4.35302e-05	CD4 Trm	Morc1
Atad2	3.13909e-09	0.53864	0.112	0.079	4.54698e-05	CD4 Trm	Atad2
Rpl3	3.16543e-09	0.110098	0.904	0.877	4.58512e-05	CD4 Trm	Rpl3
Nemp2	3.84387e-09	0.791585	0.054	0.031	5.56784e-05	CD4 Trm	Nemp2
Rdh10	3.95636e-09	1.33632	0.023	0.009	5.73078e-05	CD4 Trm	Rdh10
Atp6v0a2	3.96458e-09	0.526765	0.114	0.082	5.7427e-05	CD4 Trm	Atp6v0a2
Gm32772	4.12152e-09	2.19007	0.014	0.003	5.97002e-05	CD4 Trm	Gm32772
Sult2b1	4.25049e-09	1.20228	0.027	0.011	6.15683e-05	CD4 Trm	Sult2b1
Gm12216	4.9751e-09	0.849194	0.052	0.03	7.20643e-05	CD4 Trm	Gm12216
Enpp1	5.0714e-09	0.761903	0.06	0.036	7.34592e-05	CD4 Trm	Enpp1
Ppm1h	5.25884e-09	0.436911	0.169	0.13	7.61743e-05	CD4 Trm	Ppm1h
Olfr1033	5.31852e-09	0.315518	0.278	0.232	7.70388e-05	CD4 Trm	Olfr1033
Psmb9	5.49986e-09	0.289243	0.319	0.27	7.96655e-05	CD4 Trm	Psmb9
Pdcd2	5.85811e-09	0.669581	0.087	0.059	8.48547e-05	CD4 Trm	Pdcd2
Ppm1d	5.88854e-09	0.452092	0.149	0.113	8.52954e-05	CD4 Trm	Ppm1d
Itgal	6.3025e-09	0.316572	0.289	0.242	9.12917e-05	CD4 Trm	Itgal
Cenpl	6.59631e-09	0.49695	0.114	0.082	9.55475e-05	CD4 Trm	Cenpl
Hic1	6.97352e-09	0.543759	0.121	0.088	0.000101011	CD4 Trm	Hic1
Qpct	7.34515e-09	0.825796	0.056	0.033	0.000106394	CD4 Trm	Qpct
Fryl	7.34982e-09	0.289067	0.355	0.308	0.000106462	CD4 Trm	Fryl
Tspan14	8.14275e-09	0.506944	0.119	0.086	0.000117948	CD4 Trm	Tspan14
Akap13	8.58878e-09	0.221267	0.54	0.496	0.000124408	CD4 Trm	Akap13
Sulf2	8.65884e-09	1.20468	0.028	0.012	0.000125423	CD4 Trm	Sulf2
Pym1	9.97163e-09	0.570819	0.085	0.057	0.000144439	CD4 Trm	Pym1
Pcna	1.08006e-08	0.238109	0.397	0.349	0.000156447	CD4 Trm	Pcna
Trav14d-3-dv8	1.09712e-08	1.78349	0.016	0.005	0.000158918	CD4 Trm	Trav14d-3-dv8
Ssh2	1.11536e-08	0.338112	0.248	0.205	0.000161561	CD4 Trm	Ssh2
Rhoh	1.12274e-08	0.384296	0.236	0.195	0.000162629	CD4 Trm	Rhoh
Mthfd2	1.19031e-08	0.388852	0.168	0.13	0.000172416	CD4 Trm	Mthfd2
H2-Q6	1.20147e-08	0.141917	0.78	0.759	0.000174033	CD4 Trm	H2-Q6
Xylt2	1.22536e-08	0.849687	0.046	0.026	0.000177493	CD4 Trm	Xylt2
Trim36	1.31667e-08	0.909364	0.044	0.025	0.000190719	CD4 Trm	Trim36
Cpeb1	1.53738e-08	0.826147	0.048	0.027	0.00022269	CD4 Trm	Cpeb1
Celsr1	1.556e-08	0.688549	0.065	0.041	0.000225387	CD4 Trm	Celsr1
Bach2	1.6553e-08	0.578161	0.076	0.05	0.000239771	CD4 Trm	Bach2
Gadd45g	1.69559e-08	0.707951	0.065	0.041	0.000245606	CD4 Trm	Gadd45g
Mbp	1.75874e-08	0.336444	0.237	0.195	0.000254753	CD4 Trm	Mbp
Adgre5	1.79173e-08	0.301195	0.274	0.23	0.000259532	CD4 Trm	Adgre5
Trim12a	1.8736e-08	0.452963	0.137	0.103	0.000271391	CD4 Trm	Trim12a
A430088P11Rik	1.92833e-08	1.70668	0.016	0.005	0.000279318	CD4 Trm	A430088P11Rik
Podnl1	2.04082e-08	0.385331	0.212	0.172	0.000295613	CD4 Trm	Podnl1
D030056L22Rik	2.08386e-08	0.483476	0.109	0.078	0.000301848	CD4 Trm	D030056L22Rik
Gramd1a	2.12568e-08	0.277925	0.289	0.242	0.000307905	CD4 Trm	Gramd1a
Rps25	2.13373e-08	0.110901	0.864	0.842	0.00030907	CD4 Trm	Rps25
Snrk	2.48444e-08	0.504542	0.105	0.075	0.000359871	CD4 Trm	Snrk
Rnf149	2.49258e-08	0.666835	0.076	0.051	0.00036105	CD4 Trm	Rnf149
Ttc7b	2.73224e-08	0.940295	0.038	0.02	0.000395764	CD4 Trm	Ttc7b
Selenon	2.92246e-08	1.41083	0.021	0.008	0.000423318	CD4 Trm	Selenon
Rab19	2.92733e-08	0.576944	0.072	0.047	0.000424024	CD4 Trm	Rab19
Psmb8	3.02227e-08	0.207214	0.501	0.455	0.000437776	CD4 Trm	Psmb8
Cd38	3.12178e-08	0.486866	0.114	0.083	0.000452189	CD4 Trm	Cd38
Ccdc117	3.23411e-08	0.572278	0.088	0.061	0.000468461	CD4 Trm	Ccdc117
Asap1	3.42904e-08	0.451575	0.124	0.092	0.000496697	CD4 Trm	Asap1
Commd8	3.50569e-08	0.444145	0.137	0.104	0.000507799	CD4 Trm	Commd8
Gdf11	3.64647e-08	1.06839	0.03	0.015	0.000528191	CD4 Trm	Gdf11
B3galt5	3.79346e-08	0.566849	0.08	0.053	0.000549483	CD4 Trm	B3galt5
Polr2a	3.80479e-08	0.259734	0.334	0.288	0.000551124	CD4 Trm	Polr2a
Kras	3.82227e-08	0.271551	0.317	0.272	0.000553656	CD4 Trm	Kras
Rbm39	3.84957e-08	0.132197	0.802	0.785	0.00055761	CD4 Trm	Rbm39
Apol10b	3.94942e-08	1.23874	0.025	0.011	0.000572074	CD4 Trm	Apol10b
Dock9	4.19346e-08	1.0286	0.033	0.017	0.000607423	CD4 Trm	Dock9
Jmy	4.35609e-08	0.332588	0.254	0.213	0.000630979	CD4 Trm	Jmy
Rnf113a2	4.62674e-08	0.494516	0.11	0.08	0.000670184	CD4 Trm	Rnf113a2
Snx20	4.77441e-08	0.378366	0.177	0.14	0.000691574	CD4 Trm	Snx20
Trnt1	4.77848e-08	0.427593	0.134	0.101	0.000692162	CD4 Trm	Trnt1
Skap1	4.80206e-08	0.175418	0.53	0.482	0.000695579	CD4 Trm	Skap1
Znrf1	4.93673e-08	0.309134	0.258	0.216	0.000715086	CD4 Trm	Znrf1
P2ry10b	4.98393e-08	1.72399	0.014	0.004	0.000721922	CD4 Trm	P2ry10b
2010016I18Rik	5.05062e-08	1.31658	0.021	0.008	0.000731582	CD4 Trm	2010016I18Rik
4933406I18Rik	5.27514e-08	1.0875	0.03	0.014	0.000764104	CD4 Trm	4933406I18Rik
Vcam1	5.95158e-08	1.22069	0.023	0.01	0.000862087	CD4 Trm	Vcam1
Def6	6.0504e-08	0.471907	0.129	0.097	0.0008764	CD4 Trm	Def6
Sgms1	6.05254e-08	0.580512	0.084	0.058	0.00087671	CD4 Trm	Sgms1
Mlx	6.11569e-08	0.472968	0.092	0.064	0.000885858	CD4 Trm	Mlx
Ggct	6.8351e-08	0.754922	0.044	0.025	0.000990064	CD4 Trm	Ggct
Ezh2	7.19759e-08	0.544944	0.089	0.062	0.00104257	CD4 Trm	Ezh2
Ociad1	7.45368e-08	0.238858	0.417	0.374	0.00107967	CD4 Trm	Ociad1
Nub1	7.52377e-08	0.287435	0.275	0.233	0.00108982	CD4 Trm	Nub1
Nif3l1	7.60912e-08	0.68557	0.07	0.046	0.00110218	CD4 Trm	Nif3l1
Btbd11	7.82759e-08	0.729043	0.052	0.031	0.00113383	CD4 Trm	Btbd11
Ggnbp2	8.18807e-08	0.377241	0.196	0.158	0.00118604	CD4 Trm	Ggnbp2
Me2	8.31123e-08	0.427479	0.15	0.116	0.00120388	CD4 Trm	Me2
Btg3	8.83342e-08	0.288386	0.306	0.263	0.00127952	CD4 Trm	Btg3
Cd5	9.0107e-08	0.224294	0.431	0.388	0.0013052	CD4 Trm	Cd5
Ptrh1	9.24382e-08	1.60108	0.017	0.006	0.00133897	CD4 Trm	Ptrh1
Ifi203	9.29242e-08	0.240649	0.343	0.297	0.00134601	CD4 Trm	Ifi203
Cept1	9.34062e-08	0.375084	0.16	0.125	0.00135299	CD4 Trm	Cept1
Atg12	9.3853e-08	0.439799	0.136	0.104	0.00135946	CD4 Trm	Atg12
Ryr1	9.51284e-08	1.7891	0.013	0.004	0.00137794	CD4 Trm	Ryr1
Gm11707	9.56078e-08	1.2413	0.023	0.01	0.00138488	CD4 Trm	Gm11707
Lrrfip1	9.74965e-08	0.257422	0.315	0.272	0.00141224	CD4 Trm	Lrrfip1
Als2cl	1.04051e-07	1.19853	0.023	0.01	0.00150718	CD4 Trm	Als2cl
Hnrnpdl	1.04739e-07	0.231479	0.438	0.397	0.00151715	CD4 Trm	Hnrnpdl
Vcpkmt	1.0822e-07	0.356632	0.153	0.119	0.00156756	CD4 Trm	Vcpkmt
Ptpre	1.12361e-07	0.543437	0.092	0.065	0.00162754	CD4 Trm	Ptpre
Srsf5	1.14893e-07	0.146831	0.772	0.757	0.00166422	CD4 Trm	Srsf5
Appl2	1.18997e-07	0.618673	0.069	0.045	0.00172367	CD4 Trm	Appl2
Acoxl	1.21122e-07	0.709741	0.059	0.038	0.00175445	CD4 Trm	Acoxl
Rinl	1.32298e-07	0.256392	0.337	0.292	0.00191634	CD4 Trm	Rinl
Samd3	1.37541e-07	1.67246	0.013	0.003	0.00199228	CD4 Trm	Samd3
Mosmo	1.42066e-07	0.566536	0.08	0.055	0.00205783	CD4 Trm	Mosmo
Gng2	1.54388e-07	0.263103	0.264	0.222	0.00223631	CD4 Trm	Gng2
Arhgef3	1.56213e-07	0.318952	0.213	0.175	0.00226274	CD4 Trm	Arhgef3
Trmt61b	1.56858e-07	0.455796	0.143	0.11	0.00227209	CD4 Trm	Trmt61b
Zfp773	1.5691e-07	1.251	0.021	0.009	0.00227284	CD4 Trm	Zfp773
Gm30211	1.66303e-07	0.381282	0.334	0.296	0.00240889	CD4 Trm	Gm30211
Hexim1	1.68334e-07	0.190017	0.416	0.369	0.00243831	CD4 Trm	Hexim1
Egr2	1.80099e-07	1.58001	0.016	0.005	0.00260873	CD4 Trm	Egr2
1700016P03Rik	1.89725e-07	0.290132	0.254	0.213	0.00274816	CD4 Trm	1700016P03Rik
9030624G23Rik	1.8982e-07	0.394415	0.147	0.114	0.00274954	CD4 Trm	9030624G23Rik
Cd48	1.90549e-07	0.277606	0.313	0.271	0.00276011	CD4 Trm	Cd48
Rasal3	2.00282e-07	0.328677	0.227	0.189	0.00290109	CD4 Trm	Rasal3
Ik	2.08924e-07	0.245105	0.292	0.25	0.00302627	CD4 Trm	Ik
Ifi213	2.08984e-07	0.713102	0.069	0.047	0.00302714	CD4 Trm	Ifi213
Ifitm3	2.11591e-07	1.15349	0.03	0.015	0.00306489	CD4 Trm	Ifitm3
Lcp2	2.24842e-07	0.177425	0.563	0.522	0.00325683	CD4 Trm	Lcp2
Hsph1	2.30998e-07	0.557817	0.126	0.096	0.00334601	CD4 Trm	Hsph1
Bach2it1	2.42982e-07	1.04936	0.027	0.013	0.0035196	CD4 Trm	Bach2it1
Klrc1	2.44622e-07	1.83693	0.019	0.008	0.00354336	CD4 Trm	Klrc1
Irf2bpl	2.68495e-07	0.484437	0.095	0.068	0.00388915	CD4 Trm	Irf2bpl
Fam189b	2.69898e-07	0.334708	0.272	0.235	0.00390948	CD4 Trm	Fam189b
Hipk1	2.87025e-07	0.300258	0.23	0.192	0.00415756	CD4 Trm	Hipk1
Ttc39b	2.96082e-07	0.363249	0.223	0.186	0.00428875	CD4 Trm	Ttc39b
Syne2	3.04269e-07	0.819375	0.041	0.024	0.00440734	CD4 Trm	Syne2
Cep97	3.06466e-07	0.82697	0.039	0.022	0.00443916	CD4 Trm	Cep97
Cyld	3.08984e-07	0.294702	0.253	0.214	0.00447563	CD4 Trm	Cyld
Gpr132	3.12787e-07	0.138299	0.74	0.717	0.00453073	CD4 Trm	Gpr132
St3gal6	3.14681e-07	0.316721	0.139	0.107	0.00455815	CD4 Trm	St3gal6
Arhgap9	3.41752e-07	0.2936	0.217	0.178	0.00495027	CD4 Trm	Arhgap9
Sp4	3.59052e-07	0.430066	0.156	0.123	0.00520087	CD4 Trm	Sp4
Cacybp	4.0351e-07	0.372839	0.164	0.131	0.00584485	CD4 Trm	Cacybp
Sash3	4.22074e-07	0.464567	0.119	0.09	0.00611374	CD4 Trm	Sash3
Dzip1	4.5112e-07	1.03107	0.029	0.015	0.00653447	CD4 Trm	Dzip1
Ifrd1	4.59597e-07	0.129045	0.784	0.755	0.00665726	CD4 Trm	Ifrd1
Coq10b	4.74076e-07	0.181179	0.454	0.408	0.006867	CD4 Trm	Coq10b
Gm12185	4.76195e-07	0.389645	0.131	0.1	0.00689769	CD4 Trm	Gm12185
Prdm1	4.89025e-07	0.482726	0.098	0.071	0.00708353	CD4 Trm	Prdm1
Cbx8	5.07341e-07	1.00814	0.027	0.014	0.00734883	CD4 Trm	Cbx8
Hsdl2	5.88506e-07	0.788902	0.045	0.027	0.0085245	CD4 Trm	Hsdl2
Btla	6.31671e-07	0.536029	0.059	0.039	0.00914976	CD4 Trm	Btla
Trib2	6.98044e-07	0.349296	0.125	0.096	0.0101112	CD4 Trm	Trib2
Slc9a9	7.08767e-07	0.379054	0.139	0.108	0.0102665	CD4 Trm	Slc9a9
Hnrnpa3	7.1685e-07	0.127247	0.757	0.73	0.0103836	CD4 Trm	Hnrnpa3
Snhg5	7.40487e-07	0.266528	0.262	0.223	0.010726	CD4 Trm	Snhg5
Dnm2	7.68467e-07	0.252274	0.306	0.266	0.0111312	CD4 Trm	Dnm2
Tsc22d4	7.72211e-07	0.368804	0.194	0.16	0.0111855	CD4 Trm	Tsc22d4
Hmgcs1	8.27337e-07	0.535449	0.115	0.088	0.011984	CD4 Trm	Hmgcs1
Ppm1m	8.29724e-07	0.456279	0.084	0.059	0.0120186	CD4 Trm	Ppm1m
Parp8	8.68497e-07	0.608776	0.052	0.033	0.0125802	CD4 Trm	Parp8
Zfas1	8.84127e-07	0.250189	0.294	0.254	0.0128066	CD4 Trm	Zfas1
Tsr3	8.88733e-07	0.698125	0.049	0.031	0.0128733	CD4 Trm	Tsr3
Card11	9.07358e-07	0.44429	0.108	0.081	0.0131431	CD4 Trm	Card11
Ankrd44	9.7712e-07	0.289733	0.221	0.185	0.0141536	CD4 Trm	Ankrd44
Fam234b	1.01859e-06	0.842067	0.035	0.02	0.0147542	CD4 Trm	Fam234b
Ifit1bl1	1.16496e-06	1.33238	0.018	0.007	0.0168745	CD4 Trm	Ifit1bl1
Lcp1	1.21123e-06	0.12756	0.704	0.674	0.0175447	CD4 Trm	Lcp1
Gna13	1.2129e-06	0.120743	0.738	0.71	0.0175688	CD4 Trm	Gna13
Tra2b	1.21559e-06	0.252179	0.361	0.322	0.0176079	CD4 Trm	Tra2b
Slc12a7	1.22818e-06	0.674251	0.049	0.031	0.0177902	CD4 Trm	Slc12a7
Coro1a	1.26429e-06	0.115356	0.782	0.754	0.0183132	CD4 Trm	Coro1a
Pecam1	1.3965e-06	0.483909	0.095	0.07	0.0202282	CD4 Trm	Pecam1
Exoc6	1.40479e-06	0.569319	0.065	0.044	0.0203484	CD4 Trm	Exoc6
Dennd4c	1.53202e-06	0.406772	0.131	0.103	0.0221913	CD4 Trm	Dennd4c
Srsf7	1.54114e-06	0.177377	0.523	0.487	0.0223235	CD4 Trm	Srsf7
Klrb1f	1.56497e-06	0.79929	0.037	0.021	0.0226686	CD4 Trm	Klrb1f
Brd2	1.67969e-06	0.199765	0.401	0.36	0.0243303	CD4 Trm	Brd2
Phf20l1	1.72432e-06	0.300929	0.214	0.179	0.0249768	CD4 Trm	Phf20l1
Hells	1.80843e-06	0.856884	0.03	0.016	0.026195	CD4 Trm	Hells
Tmem71	1.84952e-06	0.505629	0.086	0.063	0.0267904	CD4 Trm	Tmem71
Zswim6	1.85337e-06	0.442877	0.136	0.108	0.0268461	CD4 Trm	Zswim6
Gimap5	1.88971e-06	0.222742	0.336	0.298	0.0273724	CD4 Trm	Gimap5
Ncald	2.11906e-06	1.28182	0.019	0.008	0.0306945	CD4 Trm	Ncald
Thap3	2.12825e-06	0.485074	0.07	0.049	0.0308277	CD4 Trm	Thap3
Evi2	2.14114e-06	0.689947	0.052	0.034	0.0310143	CD4 Trm	Evi2
Map4k1	2.24264e-06	0.452227	0.112	0.085	0.0324846	CD4 Trm	Map4k1
Gm7967	2.27845e-06	2.17253	0.01	0.003	0.0330034	CD4 Trm	Gm7967
Rdx	2.32484e-06	0.29595	0.22	0.185	0.0336753	CD4 Trm	Rdx
Dyrk2	2.39311e-06	0.519131	0.092	0.068	0.0346642	CD4 Trm	Dyrk2
Rundc3b	2.40909e-06	0.392623	0.105	0.079	0.0348957	CD4 Trm	Rundc3b
Fdps	2.48319e-06	0.53223	0.089	0.065	0.035969	CD4 Trm	Fdps
Adgrl1	2.50858e-06	0.524444	0.078	0.056	0.0363368	CD4 Trm	Adgrl1
Chsy1	2.57343e-06	0.962716	0.026	0.014	0.0372762	CD4 Trm	Chsy1
Gmfg	2.67704e-06	0.199685	0.435	0.397	0.0387769	CD4 Trm	Gmfg
Ddx43	2.75979e-06	1.09777	0.021	0.01	0.0399756	CD4 Trm	Ddx43
Tnfsf10	2.78173e-06	0.383852	0.077	0.055	0.0402934	CD4 Trm	Tnfsf10
Rab11fip4	2.81221e-06	0.636912	0.055	0.037	0.0407348	CD4 Trm	Rab11fip4
Stard7	3.29711e-06	0.536521	0.072	0.051	0.0477587	CD4 Trm	Stard7
Plcg1	3.29985e-06	0.503921	0.085	0.062	0.0477984	CD4 Trm	Plcg1
Pik3ip1	3.4528e-06	0.656562	0.043	0.027	0.0500138	CD4 Trm	Pik3ip1
Wac	3.55953e-06	0.206299	0.444	0.407	0.0515598	CD4 Trm	Wac
Sh3kbp1	3.59944e-06	0.219302	0.398	0.361	0.0521379	CD4 Trm	Sh3kbp1
Cdh1	3.61386e-06	1.42582	0.014	0.005	0.0523467	CD4 Trm	Cdh1
Ptpn4	3.61591e-06	0.75163	0.047	0.03	0.0523764	CD4 Trm	Ptpn4
Slc26a11	3.63021e-06	0.957189	0.025	0.013	0.0525836	CD4 Trm	Slc26a11
Scml4	3.64748e-06	0.524782	0.077	0.055	0.0528338	CD4 Trm	Scml4
Gpr155	3.71124e-06	0.987961	0.03	0.016	0.0537573	CD4 Trm	Gpr155
Atxn2l	4.04617e-06	0.266246	0.265	0.23	0.0586087	CD4 Trm	Atxn2l
Ddx58	4.08574e-06	0.370009	0.121	0.094	0.059182	CD4 Trm	Ddx58
Ripk2	4.18373e-06	0.478912	0.07	0.049	0.0606013	CD4 Trm	Ripk2
AI506816	4.23274e-06	0.397035	0.135	0.107	0.0613112	CD4 Trm	AI506816
Slc39a6	4.33495e-06	0.595265	0.066	0.047	0.0627917	CD4 Trm	Slc39a6
Crbn	4.44678e-06	0.255209	0.262	0.226	0.0644116	CD4 Trm	Crbn
Slc25a40	4.62785e-06	0.748695	0.041	0.025	0.0670344	CD4 Trm	Slc25a40
Prr5	4.8349e-06	0.695667	0.045	0.028	0.0700336	CD4 Trm	Prr5
Hivep2	5.06582e-06	0.272314	0.22	0.186	0.0733783	CD4 Trm	Hivep2
Slc35e1	5.18429e-06	0.391872	0.106	0.081	0.0750944	CD4 Trm	Slc35e1
Hspa8	5.29165e-06	0.135334	0.9	0.883	0.0766496	CD4 Trm	Hspa8
Tmem131l	5.57413e-06	0.681047	0.042	0.026	0.0807413	CD4 Trm	Tmem131l
Bik	5.7458e-06	0.869906	0.029	0.016	0.0832278	CD4 Trm	Bik
Ppp1r12a	5.83779e-06	0.207353	0.433	0.399	0.0845604	CD4 Trm	Ppp1r12a
Fam53c	5.8441e-06	0.375074	0.101	0.077	0.0846518	CD4 Trm	Fam53c
Eml4	5.85788e-06	0.394057	0.134	0.107	0.0848514	CD4 Trm	Eml4
H2-Q10	6.02817e-06	0.660682	0.04	0.025	0.0873181	CD4 Trm	H2-Q10
Asb2	6.09017e-06	0.218204	0.329	0.293	0.0882161	CD4 Trm	Asb2
Ccl3	6.14398e-06	1.70213	0.027	0.015	0.0889955	CD4 Trm	Ccl3
Hnrnpu	6.4625e-06	0.178208	0.51	0.475	0.0936093	CD4 Trm	Hnrnpu
Srsf4	6.66428e-06	0.420617	0.113	0.088	0.0965322	CD4 Trm	Srsf4
Abtb2	7.03878e-06	0.81098	0.041	0.025	0.101957	CD4 Trm	Abtb2
Tmem97	7.89733e-06	0.68411	0.044	0.028	0.114393	CD4 Trm	Tmem97
Mrpl58	8.00541e-06	0.384709	0.105	0.081	0.115958	CD4 Trm	Mrpl58
Agfg2	8.43605e-06	0.711279	0.042	0.027	0.122196	CD4 Trm	Agfg2
Pawr	8.49452e-06	0.853032	0.031	0.018	0.123043	CD4 Trm	Pawr
Tle4	8.51887e-06	0.451669	0.106	0.082	0.123396	CD4 Trm	Tle4
Tbc1d10c	8.8263e-06	0.269382	0.207	0.174	0.127849	CD4 Trm	Tbc1d10c
Uchl3	9.39153e-06	0.428534	0.1	0.077	0.136036	CD4 Trm	Uchl3
Pde11a	1.00851e-05	0.829884	0.03	0.017	0.146082	CD4 Trm	Pde11a
Prps1	1.04167e-05	0.438927	0.095	0.072	0.150886	CD4 Trm	Prps1
Snhg16	1.08728e-05	0.56607	0.059	0.041	0.157492	CD4 Trm	Snhg16
Chst12	1.09224e-05	0.716181	0.046	0.03	0.158212	CD4 Trm	Chst12
Clk1	1.10259e-05	0.136272	0.654	0.622	0.15971	CD4 Trm	Clk1
Cblb	1.13578e-05	0.314717	0.208	0.177	0.164518	CD4 Trm	Cblb
Phf6	1.1497e-05	0.281313	0.214	0.183	0.166534	CD4 Trm	Phf6
H2-M3	1.16985e-05	0.307355	0.174	0.144	0.169452	CD4 Trm	H2-M3
Ier5	1.18486e-05	0.173548	0.452	0.414	0.171628	CD4 Trm	Ier5
Selplg	1.21359e-05	0.122328	0.652	0.623	0.175788	CD4 Trm	Selplg
Galnt10	1.22787e-05	0.642784	0.051	0.034	0.177856	CD4 Trm	Galnt10
Daxx	1.24047e-05	0.555181	0.053	0.036	0.179682	CD4 Trm	Daxx
Sp140	1.32258e-05	0.400342	0.103	0.079	0.191575	CD4 Trm	Sp140
Matr3	1.43575e-05	0.251411	0.213	0.181	0.207969	CD4 Trm	Matr3
Ptpn12	1.46853e-05	0.771023	0.033	0.019	0.212716	CD4 Trm	Ptpn12
Nxf1	1.47686e-05	0.299085	0.177	0.148	0.213923	CD4 Trm	Nxf1
Stk4	1.48058e-05	0.231827	0.438	0.406	0.214462	CD4 Trm	Stk4
Smurf2	1.52938e-05	0.441976	0.079	0.058	0.221531	CD4 Trm	Smurf2
Gabarapl2	1.63153e-05	0.148414	0.487	0.453	0.236326	CD4 Trm	Gabarapl2
Gas5	1.65352e-05	0.103055	0.726	0.71	0.239513	CD4 Trm	Gas5
B4galt1	1.68174e-05	0.310542	0.154	0.126	0.243599	CD4 Trm	B4galt1
Zscan2	1.73817e-05	0.805327	0.028	0.016	0.251773	CD4 Trm	Zscan2
1600014C10Rik	1.76119e-05	0.448062	0.086	0.065	0.255108	CD4 Trm	1600014C10Rik
Fam111a	1.81712e-05	0.548177	0.065	0.047	0.263209	CD4 Trm	Fam111a
Siah1a	1.81928e-05	0.659021	0.046	0.031	0.263522	CD4 Trm	Siah1a
Fbxl12	1.90441e-05	0.342768	0.129	0.103	0.275854	CD4 Trm	Fbxl12
Bcl6	1.91303e-05	0.356368	0.087	0.065	0.277103	CD4 Trm	Bcl6
Sirt7	2.06633e-05	0.279081	0.199	0.169	0.299308	CD4 Trm	Sirt7
Cd247	2.07168e-05	0.106212	0.467	0.425	0.300083	CD4 Trm	Cd247
Traf3ip3	2.23003e-05	0.319449	0.129	0.104	0.32302	CD4 Trm	Traf3ip3
Fbxo32	2.32159e-05	0.518476	0.065	0.046	0.336283	CD4 Trm	Fbxo32
Cdk5rap3	2.34812e-05	0.440661	0.082	0.061	0.340125	CD4 Trm	Cdk5rap3
Rasal1	2.35935e-05	1.32016	0.012	0.004	0.341752	CD4 Trm	Rasal1
Rabggtb	2.42116e-05	0.371881	0.106	0.083	0.350705	CD4 Trm	Rabggtb
Tspyl1	2.45076e-05	0.408815	0.117	0.093	0.354993	CD4 Trm	Tspyl1
Supt4a	2.48944e-05	0.177523	0.443	0.406	0.360596	CD4 Trm	Supt4a
Tmtc4	2.55776e-05	0.815824	0.023	0.012	0.370492	CD4 Trm	Tmtc4
Ifit2	2.66422e-05	1.14849	0.018	0.008	0.385913	CD4 Trm	Ifit2
Ctnnbip1	2.78085e-05	0.868999	0.026	0.014	0.402806	CD4 Trm	Ctnnbip1
Dop1b	2.88419e-05	0.570764	0.054	0.037	0.417775	CD4 Trm	Dop1b
Maco1	2.93174e-05	0.564127	0.054	0.037	0.424662	CD4 Trm	Maco1
Xcr1	3.00476e-05	1.12246	0.015	0.007	0.43524	CD4 Trm	Xcr1
Ripor2	3.14624e-05	0.328672	0.121	0.097	0.455733	CD4 Trm	Ripor2
Suv39h1	3.35002e-05	0.881046	0.026	0.015	0.485251	CD4 Trm	Suv39h1
Lin54	3.37642e-05	0.351575	0.148	0.122	0.489074	CD4 Trm	Lin54
Crtam	3.56407e-05	1.52986	0.014	0.006	0.516256	CD4 Trm	Crtam
Luzp1	3.64609e-05	0.601664	0.041	0.027	0.528136	CD4 Trm	Luzp1
Pou6f1	3.74038e-05	0.539565	0.054	0.038	0.541794	CD4 Trm	Pou6f1
Tspyl4	3.81869e-05	1.06382	0.017	0.008	0.553137	CD4 Trm	Tspyl4
Zranb2	3.88799e-05	0.330632	0.141	0.115	0.563175	CD4 Trm	Zranb2
S1pr1	3.94075e-05	0.962975	0.03	0.018	0.570817	CD4 Trm	S1pr1
2810013P06Rik	4.01766e-05	0.482237	0.071	0.052	0.581958	CD4 Trm	2810013P06Rik
Armc7	4.5111e-05	0.536255	0.06	0.043	0.653432	CD4 Trm	Armc7
Zkscan14	4.59957e-05	0.43007	0.063	0.046	0.666248	CD4 Trm	Zkscan14
Crlf3	5.11971e-05	0.214257	0.224	0.193	0.74159	CD4 Trm	Crlf3
Tcrg-V1	5.13305e-05	1.3083	0.012	0.005	0.743523	CD4 Trm	Tcrg-V1
Tm6sf1	5.15857e-05	1.23505	0.012	0.005	0.747219	CD4 Trm	Tm6sf1
Saraf	5.53169e-05	0.104309	0.665	0.637	0.801266	CD4 Trm	Saraf
Arap2	5.56541e-05	0.186031	0.379	0.345	0.806149	CD4 Trm	Arap2
9930111J21Rik2	5.64543e-05	0.36702	0.102	0.081	0.81774	CD4 Trm	9930111J21Rik2
Kif2a	5.86837e-05	0.351867	0.123	0.1	0.850034	CD4 Trm	Kif2a
Ifi47	5.89011e-05	0.217546	0.16	0.133	0.853183	CD4 Trm	Ifi47
Aak1	5.94804e-05	0.264258	0.164	0.137	0.861574	CD4 Trm	Aak1
Nfx1	5.95345e-05	0.298307	0.145	0.12	0.862357	CD4 Trm	Nfx1
Arl4d	5.98992e-05	1.25742	0.013	0.005	0.86764	CD4 Trm	Arl4d
Fus	6.09006e-05	0.127394	0.627	0.612	0.882145	CD4 Trm	Fus
Tiprl	6.31354e-05	0.276203	0.193	0.165	0.914516	CD4 Trm	Tiprl
Fam49b	6.53623e-05	0.168034	0.379	0.345	0.946773	CD4 Trm	Fam49b
Mknk2	6.93021e-05	0.213822	0.255	0.224	1	CD4 Trm	Mknk2
Max	6.95847e-05	0.29461	0.155	0.129	1	CD4 Trm	Max
Ric1	6.9992e-05	0.25457	0.201	0.172	1	CD4 Trm	Ric1
Sod1	7.14454e-05	0.171444	0.419	0.387	1	CD4 Trm	Sod1
Dnajb9	7.16727e-05	0.227735	0.263	0.233	1	CD4 Trm	Dnajb9
Hsdl1	7.25496e-05	0.700718	0.029	0.018	1	CD4 Trm	Hsdl1
Cd9	7.35368e-05	0.635575	0.03	0.018	1	CD4 Trm	Cd9
Dusp6	7.71751e-05	0.331423	0.11	0.088	1	CD4 Trm	Dusp6
Ugp2	7.74908e-05	0.401361	0.113	0.091	1	CD4 Trm	Ugp2
Mafk	7.7563e-05	0.447661	0.075	0.056	1	CD4 Trm	Mafk
Isg15	7.97301e-05	0.290425	0.305	0.275	1	CD4 Trm	Isg15
Zbp1	7.99478e-05	0.29923	0.139	0.115	1	CD4 Trm	Zbp1
Prkrip1	8.03517e-05	0.452494	0.052	0.037	1	CD4 Trm	Prkrip1
Cers6	8.09184e-05	0.850961	0.028	0.017	1	CD4 Trm	Cers6
Gimap8	8.18125e-05	0.203526	0.292	0.261	1	CD4 Trm	Gimap8
Adrb1	8.31959e-05	1.073	0.014	0.007	1	CD4 Trm	Adrb1
Emp1	8.43852e-05	0.385052	0.083	0.063	1	CD4 Trm	Emp1
Ccdc82	8.45483e-05	0.2701	0.151	0.126	1	CD4 Trm	Ccdc82
Actn4	8.89242e-05	0.235879	0.227	0.198	1	CD4 Trm	Actn4
Zfand2a	9.09643e-05	0.662809	0.036	0.023	1	CD4 Trm	Zfand2a
Prorsd1	9.27365e-05	0.396776	0.076	0.058	1	CD4 Trm	Prorsd1
Tex14	9.3001e-05	0.204088	0.279	0.249	1	CD4 Trm	Tex14
Srebf2	9.32951e-05	0.244403	0.235	0.206	1	CD4 Trm	Srebf2
Sephs2	9.33672e-05	0.495582	0.044	0.03	1	CD4 Trm	Sephs2
Scin	9.54364e-05	1.62355	0.011	0.004	1	CD4 Trm	Scin
Irf2	9.91427e-05	0.223213	0.222	0.194	1	CD4 Trm	Irf2
Slc28a2	9.96576e-05	0.374183	0.112	0.09	1	CD4 Trm	Slc28a2
Srsf1	0.00010258	0.30052	0.138	0.115	1	CD4 Trm	Srsf1
Crybg2	0.0001042	0.966521	0.017	0.009	1	CD4 Trm	Crybg2
Dguok	0.000104659	0.317255	0.136	0.112	1	CD4 Trm	Dguok
Eif2ak3	0.000105018	0.623187	0.039	0.026	1	CD4 Trm	Eif2ak3
Kdm2a	0.000105357	0.399112	0.106	0.085	1	CD4 Trm	Kdm2a
Sc5d	0.000107191	0.274002	0.126	0.103	1	CD4 Trm	Sc5d
Capn3	0.000108959	1.03044	0.018	0.009	1	CD4 Trm	Capn3
Cd244a	0.000109842	0.980582	0.016	0.008	1	CD4 Trm	Cd244a
Acot2	0.000109859	0.64389	0.032	0.02	1	CD4 Trm	Acot2
Gm7030	0.000112816	0.472522	0.064	0.047	1	CD4 Trm	Gm7030
Grb7	0.000116565	0.585286	0.056	0.041	1	CD4 Trm	Grb7
Aim2	0.00011686	0.303959	0.168	0.143	1	CD4 Trm	Aim2
Rnf14	0.000118974	0.379386	0.075	0.057	1	CD4 Trm	Rnf14
Rassf5	0.000124611	0.182454	0.218	0.189	1	CD4 Trm	Rassf5
Hdhd5	0.000127084	0.422543	0.068	0.051	1	CD4 Trm	Hdhd5
Ifitm10	0.000136515	1.20851	0.011	0.004	1	CD4 Trm	Ifitm10
Acat2	0.00013795	0.708488	0.028	0.018	1	CD4 Trm	Acat2
Sf1	0.000138019	0.142031	0.438	0.405	1	CD4 Trm	Sf1
Iglc2	0.000138792	0.460714	0.125	0.103	1	CD4 Trm	Iglc2
Orc5	0.000145566	0.701029	0.026	0.016	1	CD4 Trm	Orc5
Noct	0.000149417	0.563525	0.025	0.015	1	CD4 Trm	Noct
Ogt	0.000155866	0.312826	0.148	0.125	1	CD4 Trm	Ogt
Dynll1	0.000162521	0.171963	0.373	0.343	1	CD4 Trm	Dynll1
Mink1	0.000163211	0.362958	0.073	0.056	1	CD4 Trm	Mink1
Smpd5	0.000166517	0.487268	0.045	0.031	1	CD4 Trm	Smpd5
Tgif2	0.000169705	0.336422	0.099	0.079	1	CD4 Trm	Tgif2
Usf1	0.000173154	0.615674	0.035	0.023	1	CD4 Trm	Usf1
Usp24	0.000176199	0.3578	0.074	0.056	1	CD4 Trm	Usp24
Cherp	0.000180699	0.336745	0.088	0.069	1	CD4 Trm	Cherp
Cebpg	0.000184344	0.304323	0.107	0.086	1	CD4 Trm	Cebpg
Katnb1	0.000192948	0.669214	0.028	0.018	1	CD4 Trm	Katnb1
Zfp821	0.000194508	1.18703	0.012	0.005	1	CD4 Trm	Zfp821
Mprip	0.000194612	0.299306	0.159	0.135	1	CD4 Trm	Mprip
1110059G10Rik	0.000200171	0.353822	0.099	0.079	1	CD4 Trm	1110059G10Rik
Sbds	0.0002006	0.175918	0.252	0.222	1	CD4 Trm	Sbds
Nol7	0.00020432	0.155186	0.312	0.281	1	CD4 Trm	Nol7
Sh2d1a	0.000204925	0.205114	0.161	0.136	1	CD4 Trm	Sh2d1a
Epb41l4aos	0.000206975	0.406914	0.07	0.053	1	CD4 Trm	Epb41l4aos
Lnpep	0.000209903	0.198668	0.232	0.204	1	CD4 Trm	Lnpep
Armc1	0.000219218	0.386996	0.074	0.057	1	CD4 Trm	Armc1
Mylip	0.000221624	0.529095	0.042	0.029	1	CD4 Trm	Mylip
2310061I04Rik	0.000231703	0.535371	0.039	0.027	1	CD4 Trm	2310061I04Rik
Agpat3	0.000234855	0.29627	0.135	0.112	1	CD4 Trm	Agpat3
S1pr4	0.000236322	0.583388	0.044	0.031	1	CD4 Trm	S1pr4
Tdrp	0.00023824	1.36761	0.01	0.004	1	CD4 Trm	Tdrp
Xkr6	0.00023978	0.605345	0.038	0.026	1	CD4 Trm	Xkr6
Tob1	0.000241942	0.283417	0.165	0.141	1	CD4 Trm	Tob1
Cox5a	0.000247722	0.131233	0.462	0.431	1	CD4 Trm	Cox5a
Pttg1	0.0002546	0.261305	0.275	0.248	1	CD4 Trm	Pttg1
2810001G20Rik	0.000256136	0.48722	0.042	0.029	1	CD4 Trm	2810001G20Rik
Morc3	0.000256292	0.41502	0.086	0.068	1	CD4 Trm	Morc3
Med10	0.000260134	0.22975	0.198	0.171	1	CD4 Trm	Med10
Tbc1d4	0.000266094	0.379826	0.082	0.064	1	CD4 Trm	Tbc1d4
Pfdn5	0.000268883	0.113178	0.642	0.621	1	CD4 Trm	Pfdn5
Atxn7l2	0.000283951	0.696306	0.03	0.019	1	CD4 Trm	Atxn7l2
Ifi214	0.000284709	1.14927	0.017	0.009	1	CD4 Trm	Ifi214
Pdlim2	0.000287165	0.412972	0.068	0.052	1	CD4 Trm	Pdlim2
Mrps5	0.000296207	0.241228	0.137	0.114	1	CD4 Trm	Mrps5
Tor1aip1	0.00029806	0.153417	0.351	0.32	1	CD4 Trm	Tor1aip1
Hbp1	0.000299007	0.206066	0.285	0.258	1	CD4 Trm	Hbp1
Rbm3	0.000305864	0.107251	0.729	0.712	1	CD4 Trm	Rbm3
Ubn1	0.000308349	0.244782	0.213	0.187	1	CD4 Trm	Ubn1
Il12rb1	0.000332188	0.315704	0.127	0.106	1	CD4 Trm	Il12rb1
Gfi1	0.00035148	0.458111	0.041	0.029	1	CD4 Trm	Gfi1
Il7r	0.000378657	0.168274	0.741	0.759	1	CD4 Trm	Il7r
Ccdc50	0.000388188	0.234585	0.138	0.116	1	CD4 Trm	Ccdc50
Hist1h1c	0.000388241	0.154543	0.237	0.209	1	CD4 Trm	Hist1h1c
Sertad2	0.000391352	0.398838	0.069	0.053	1	CD4 Trm	Sertad2
Dvl2	0.000395953	0.859545	0.022	0.013	1	CD4 Trm	Dvl2
Casp3	0.00039698	0.375299	0.101	0.082	1	CD4 Trm	Casp3
Phf10	0.000408155	0.651041	0.029	0.019	1	CD4 Trm	Phf10
Trim23	0.000413856	0.625154	0.029	0.018	1	CD4 Trm	Trim23
Gm13481	0.000415014	0.330146	0.086	0.068	1	CD4 Trm	Gm13481
Gps2	0.000415341	0.256153	0.165	0.142	1	CD4 Trm	Gps2
Gm20939	0.000428016	1.09376	0.01	0.004	1	CD4 Trm	Gm20939
Prrt1	0.000430251	0.153141	0.202	0.175	1	CD4 Trm	Prrt1
Prkcq	0.000431844	0.244904	0.114	0.094	1	CD4 Trm	Prkcq
Mns1	0.000440472	0.507793	0.045	0.032	1	CD4 Trm	Mns1
Tspan5	0.000440814	0.428938	0.049	0.036	1	CD4 Trm	Tspan5
Irf8	0.00044382	0.716181	0.039	0.027	1	CD4 Trm	Irf8
Tmem140	0.0004583	0.494542	0.046	0.033	1	CD4 Trm	Tmem140
Gm48236	0.000459982	0.251192	0.113	0.092	1	CD4 Trm	Gm48236
Rab35	0.000467291	0.251496	0.138	0.116	1	CD4 Trm	Rab35
Taf5	0.0004739	0.27275	0.082	0.065	1	CD4 Trm	Taf5
Mical2	0.000479444	0.923421	0.015	0.008	1	CD4 Trm	Mical2
Actn1	0.00048708	0.756524	0.02	0.011	1	CD4 Trm	Actn1
Smc3	0.000491945	0.228977	0.201	0.176	1	CD4 Trm	Smc3
Flt3l	0.000493663	0.266906	0.145	0.123	1	CD4 Trm	Flt3l
Abr	0.000495545	0.337932	0.083	0.066	1	CD4 Trm	Abr
Gm14029	0.000495699	0.590359	0.028	0.018	1	CD4 Trm	Gm14029
Cln3	0.000504168	0.482588	0.05	0.037	1	CD4 Trm	Cln3
Igf2r	0.000519245	0.38147	0.084	0.067	1	CD4 Trm	Igf2r
Vav3	0.000528565	0.368603	0.084	0.067	1	CD4 Trm	Vav3
Unc5a	0.000533798	0.794138	0.017	0.009	1	CD4 Trm	Unc5a
Csk	0.000539445	0.16668	0.311	0.282	1	CD4 Trm	Csk
Nmi	0.000563275	0.224852	0.18	0.156	1	CD4 Trm	Nmi
Dnah7a	0.000580954	0.238198	0.123	0.103	1	CD4 Trm	Dnah7a
Ss18	0.0005981	0.208513	0.167	0.144	1	CD4 Trm	Ss18
Mtmr1	0.000600159	0.358682	0.087	0.069	1	CD4 Trm	Mtmr1
Taf13	0.000603968	0.400717	0.085	0.068	1	CD4 Trm	Taf13
Nsdhl	0.000618389	0.423994	0.067	0.052	1	CD4 Trm	Nsdhl
Zgpat	0.000623027	0.430702	0.056	0.042	1	CD4 Trm	Zgpat
Trib3	0.000628289	0.935494	0.016	0.009	1	CD4 Trm	Trib3
Zfp707	0.00063271	0.612339	0.029	0.019	1	CD4 Trm	Zfp707
Wdr43	0.000635532	0.222017	0.132	0.11	1	CD4 Trm	Wdr43
Hes6	0.000636858	0.632795	0.035	0.024	1	CD4 Trm	Hes6
Klf6	0.000647161	0.164343	0.666	0.651	1	CD4 Trm	Klf6
Clec2d	0.000650049	0.215099	0.147	0.125	1	CD4 Trm	Clec2d
Nop14	0.000666102	0.280761	0.104	0.085	1	CD4 Trm	Nop14
Acap2	0.000671359	0.286691	0.126	0.106	1	CD4 Trm	Acap2
Lncpint	0.000676807	0.251204	0.106	0.087	1	CD4 Trm	Lncpint
Tef	0.000692439	0.509359	0.033	0.022	1	CD4 Trm	Tef
Rcc1l	0.000696742	0.444145	0.045	0.033	1	CD4 Trm	Rcc1l
Herc3	0.000717408	0.394358	0.075	0.059	1	CD4 Trm	Herc3
Morc2a	0.000732607	0.461563	0.041	0.029	1	CD4 Trm	Morc2a
Ube2s	0.000740412	0.128008	0.537	0.514	1	CD4 Trm	Ube2s
Ube2v2	0.00074344	0.292651	0.084	0.067	1	CD4 Trm	Ube2v2
2610044O15Rik8	0.000748639	0.999624	0.016	0.009	1	CD4 Trm	2610044O15Rik8
Ahr	0.000757943	0.295577	0.124	0.104	1	CD4 Trm	Ahr
Gadd45gip1	0.000758436	0.267651	0.131	0.11	1	CD4 Trm	Gadd45gip1
Racgap1	0.000771704	0.534956	0.035	0.024	1	CD4 Trm	Racgap1
Clspn	0.00078296	1.00764	0.01	0.005	1	CD4 Trm	Clspn
Hist1h4d	0.000793091	0.496511	0.056	0.043	1	CD4 Trm	Hist1h4d
Zfp952	0.000795192	0.820851	0.017	0.01	1	CD4 Trm	Zfp952
Nosip	0.000805712	0.314856	0.083	0.067	1	CD4 Trm	Nosip
Hnrnpd	0.000805804	0.191269	0.369	0.345	1	CD4 Trm	Hnrnpd
H2afx	0.000807164	0.336828	0.11	0.092	1	CD4 Trm	H2afx
Fcrl1	0.000814032	0.62581	0.026	0.017	1	CD4 Trm	Fcrl1
Snhg6	0.000815836	0.229913	0.163	0.141	1	CD4 Trm	Snhg6
Zadh2	0.000830303	0.410832	0.063	0.048	1	CD4 Trm	Zadh2
Sos1	0.000831195	0.429215	0.058	0.044	1	CD4 Trm	Sos1
Idnk	0.000837596	0.261607	0.184	0.162	1	CD4 Trm	Idnk
Cnst	0.000865079	0.388625	0.072	0.057	1	CD4 Trm	Cnst
Kcnk5	0.000870275	0.606186	0.028	0.019	1	CD4 Trm	Kcnk5
Sertad1	0.000870333	0.215674	0.164	0.141	1	CD4 Trm	Sertad1
Map4k4	0.000877769	0.168563	0.169	0.146	1	CD4 Trm	Map4k4
Fam102a	0.00088777	0.244875	0.171	0.149	1	CD4 Trm	Fam102a
Fdft1	0.00088857	0.417423	0.073	0.057	1	CD4 Trm	Fdft1
Slbp	0.000896502	0.207024	0.237	0.212	1	CD4 Trm	Slbp
Aldh4a1	0.000912613	0.950444	0.013	0.007	1	CD4 Trm	Aldh4a1
Cetn4	0.000930964	1.01046	0.01	0.004	1	CD4 Trm	Cetn4
Arhgap45	0.000931449	0.149463	0.383	0.356	1	CD4 Trm	Arhgap45
Pip5k1a	0.000932458	0.296936	0.119	0.1	1	CD4 Trm	Pip5k1a
Gpr55	0.00094138	0.119276	0.264	0.235	1	CD4 Trm	Gpr55
Itpr1	0.000961126	0.267948	0.149	0.128	1	CD4 Trm	Itpr1
Polg2	0.000964487	0.315579	0.09	0.073	1	CD4 Trm	Polg2
Il17ra	0.000965758	0.363952	0.079	0.063	1	CD4 Trm	Il17ra
Gtpbp1	0.000968323	0.336115	0.085	0.069	1	CD4 Trm	Gtpbp1
Pml	0.000971126	0.502125	0.046	0.034	1	CD4 Trm	Pml
Tex9	0.000977085	0.771669	0.019	0.011	1	CD4 Trm	Tex9
Lysmd3	0.000984545	0.359887	0.119	0.101	1	CD4 Trm	Lysmd3
Hps4	0.000984747	0.376433	0.067	0.052	1	CD4 Trm	Hps4
Mpzl3	0.000988804	0.690224	0.034	0.023	1	CD4 Trm	Mpzl3
Il4ra	0.000993402	0.157351	0.376	0.346	1	CD4 Trm	Il4ra
Virma	0.000995581	0.250465	0.182	0.16	1	CD4 Trm	Virma
Ccdc136	0.00102295	1.03406	0.012	0.006	1	CD4 Trm	Ccdc136
Sh3gl1	0.00102408	0.391174	0.063	0.049	1	CD4 Trm	Sh3gl1
Stim2	0.00102449	0.405546	0.072	0.057	1	CD4 Trm	Stim2
Sf3a2	0.00103039	0.251172	0.131	0.111	1	CD4 Trm	Sf3a2
Sumo1	0.00103804	0.152736	0.429	0.406	1	CD4 Trm	Sumo1
Gpr174	0.00104538	0.289272	0.097	0.079	1	CD4 Trm	Gpr174
Srpk2	0.00110546	0.259384	0.118	0.099	1	CD4 Trm	Srpk2
Trp53inp2	0.00112197	0.443928	0.042	0.031	1	CD4 Trm	Trp53inp2
Hmgn2	0.00120503	0.211451	0.162	0.141	1	CD4 Trm	Hmgn2
Art2b	0.00122617	0.331916	0.107	0.089	1	CD4 Trm	Art2b
Katna1	0.00123622	0.227433	0.179	0.157	1	CD4 Trm	Katna1
Fbxo21	0.00126884	0.512551	0.033	0.023	1	CD4 Trm	Fbxo21
Cdkn1b	0.00127461	0.165248	0.22	0.196	1	CD4 Trm	Cdkn1b
Mcm4	0.00127587	0.263566	0.103	0.086	1	CD4 Trm	Mcm4
Slc38a2	0.00128666	0.139027	0.379	0.354	1	CD4 Trm	Slc38a2
Orc6	0.00129855	0.348007	0.067	0.053	1	CD4 Trm	Orc6
L3mbtl3	0.00130289	0.375194	0.049	0.036	1	CD4 Trm	L3mbtl3
Tln1	0.00131256	0.136727	0.466	0.442	1	CD4 Trm	Tln1
Atp5h	0.00133292	0.105973	0.595	0.57	1	CD4 Trm	Atp5h
Tbkbp1	0.00133358	1.02296	0.012	0.006	1	CD4 Trm	Tbkbp1
G3bp2	0.00134644	0.167257	0.302	0.276	1	CD4 Trm	G3bp2
Elp2	0.00134724	0.415268	0.055	0.042	1	CD4 Trm	Elp2
Ntrk3	0.00137213	0.479518	0.037	0.026	1	CD4 Trm	Ntrk3
Ago2	0.00139108	0.185212	0.269	0.244	1	CD4 Trm	Ago2
Pcnt	0.00141541	0.291996	0.112	0.094	1	CD4 Trm	Pcnt
Nop56	0.00141899	0.169758	0.27	0.245	1	CD4 Trm	Nop56
Marcksl1	0.00143577	0.359196	0.1	0.083	1	CD4 Trm	Marcksl1
Rtp4	0.00147706	0.404801	0.062	0.048	1	CD4 Trm	Rtp4
Chic2	0.00148661	0.205541	0.268	0.245	1	CD4 Trm	Chic2
Gripap1	0.00151243	0.276159	0.092	0.075	1	CD4 Trm	Gripap1
Srrm1	0.00153629	0.135871	0.384	0.359	1	CD4 Trm	Srrm1
Rnf114	0.00154093	0.169219	0.219	0.194	1	CD4 Trm	Rnf114
Alkbh4	0.00156631	0.651398	0.021	0.014	1	CD4 Trm	Alkbh4
Ncoa1	0.00160919	0.308989	0.103	0.086	1	CD4 Trm	Ncoa1
Inpp5d	0.00164375	0.168169	0.263	0.239	1	CD4 Trm	Inpp5d
Dcp1b	0.00164429	0.662118	0.032	0.022	1	CD4 Trm	Dcp1b
Mical1	0.00165682	0.280142	0.104	0.086	1	CD4 Trm	Mical1
Lilrb4a	0.00166324	0.222289	0.167	0.146	1	CD4 Trm	Lilrb4a
Zfp874b	0.00166688	0.449473	0.043	0.031	1	CD4 Trm	Zfp874b
Chpt1	0.00169029	0.964349	0.012	0.007	1	CD4 Trm	Chpt1
Tsr2	0.00171167	0.380976	0.053	0.04	1	CD4 Trm	Tsr2
L3mbtl2	0.00172174	0.56237	0.028	0.019	1	CD4 Trm	L3mbtl2
Gm4070	0.00173928	0.405814	0.051	0.038	1	CD4 Trm	Gm4070
Cep76	0.00176414	0.893674	0.013	0.007	1	CD4 Trm	Cep76
Wbp1	0.00177357	0.249459	0.099	0.082	1	CD4 Trm	Wbp1
Sipa1l1	0.00179041	0.253899	0.14	0.12	1	CD4 Trm	Sipa1l1
Mtif2	0.00182533	0.316684	0.08	0.065	1	CD4 Trm	Mtif2
Raf1	0.00183105	0.206012	0.177	0.156	1	CD4 Trm	Raf1
Pxn	0.00184633	0.234928	0.105	0.088	1	CD4 Trm	Pxn
Trak1	0.00185558	0.42648	0.04	0.03	1	CD4 Trm	Trak1
Psmg2	0.00188283	0.393077	0.07	0.056	1	CD4 Trm	Psmg2
Slc25a28	0.00188944	0.335647	0.08	0.065	1	CD4 Trm	Slc25a28
Mta3	0.00191448	0.207877	0.193	0.171	1	CD4 Trm	Mta3
Gm6034	0.00191525	0.782248	0.014	0.008	1	CD4 Trm	Gm6034
Gngt2	0.00193058	0.250922	0.144	0.125	1	CD4 Trm	Gngt2
Unc5cl	0.00193457	0.510996	0.024	0.016	1	CD4 Trm	Unc5cl
Pcgf6	0.00193867	0.360703	0.053	0.04	1	CD4 Trm	Pcgf6
Luc7l	0.00194335	0.242034	0.176	0.155	1	CD4 Trm	Luc7l
Cdkn2aip	0.00194809	0.26434	0.073	0.058	1	CD4 Trm	Cdkn2aip
Rbl1	0.00196588	0.493726	0.032	0.023	1	CD4 Trm	Rbl1
Zup1	0.00198174	0.237244	0.123	0.104	1	CD4 Trm	Zup1
Atg2a	0.00198371	0.273799	0.106	0.089	1	CD4 Trm	Atg2a
Axin1	0.00199419	0.221563	0.128	0.109	1	CD4 Trm	Axin1
Psme2b	0.00200353	0.393345	0.044	0.033	1	CD4 Trm	Psme2b
Zfp280d	0.0020079	0.368141	0.068	0.054	1	CD4 Trm	Zfp280d
Unc119b	0.00201708	0.345295	0.067	0.053	1	CD4 Trm	Unc119b
Cdkn2d	0.0020209	0.30864	0.067	0.053	1	CD4 Trm	Cdkn2d
Gucd1	0.00203539	0.589318	0.023	0.015	1	CD4 Trm	Gucd1
Hpgds	0.00204731	0.468926	0.037	0.027	1	CD4 Trm	Hpgds
Gpsm3	0.00210782	0.187701	0.267	0.244	1	CD4 Trm	Gpsm3
Limk1	0.00213286	0.601269	0.032	0.022	1	CD4 Trm	Limk1
Preb	0.0021689	0.294598	0.084	0.069	1	CD4 Trm	Preb
Dclre1c	0.00217096	0.590583	0.032	0.022	1	CD4 Trm	Dclre1c
Bms1	0.00221197	0.294623	0.079	0.064	1	CD4 Trm	Bms1
Hax1	0.00221656	0.310478	0.098	0.082	1	CD4 Trm	Hax1
Rbm4	0.00225226	0.579063	0.02	0.013	1	CD4 Trm	Rbm4
Mocs2	0.00228824	0.374606	0.051	0.039	1	CD4 Trm	Mocs2
Ap3s1	0.00230132	0.158917	0.261	0.237	1	CD4 Trm	Ap3s1
Zswim1	0.00231179	0.749938	0.018	0.011	1	CD4 Trm	Zswim1
Car2	0.00231301	0.413838	0.087	0.071	1	CD4 Trm	Car2
Mrpl18	0.00232602	0.314006	0.089	0.074	1	CD4 Trm	Mrpl18
Tab1	0.00233508	0.853032	0.011	0.006	1	CD4 Trm	Tab1
Ythdc2	0.00233735	0.410943	0.039	0.029	1	CD4 Trm	Ythdc2
Hp1bp3	0.00235781	0.149279	0.292	0.268	1	CD4 Trm	Hp1bp3
Ppp3cb	0.00238995	0.231654	0.155	0.136	1	CD4 Trm	Ppp3cb
Sfpq	0.00239979	0.127312	0.619	0.607	1	CD4 Trm	Sfpq
Amd1	0.00244567	0.257599	0.122	0.104	1	CD4 Trm	Amd1
Tbc1d25	0.00247839	0.715528	0.021	0.013	1	CD4 Trm	Tbc1d25
Spryd7	0.00247991	0.422913	0.088	0.073	1	CD4 Trm	Spryd7
Asf1b	0.00254691	0.877779	0.012	0.007	1	CD4 Trm	Asf1b
Glipr2	0.002552	0.294678	0.074	0.06	1	CD4 Trm	Glipr2
Ahrr	0.00256341	0.601664	0.021	0.013	1	CD4 Trm	Ahrr
Tbc1d15	0.0025697	0.210323	0.194	0.173	1	CD4 Trm	Tbc1d15
Vps26b	0.00257114	0.230237	0.106	0.089	1	CD4 Trm	Vps26b
Plekha5	0.0026013	0.268469	0.096	0.08	1	CD4 Trm	Plekha5
Polr3gl	0.0026195	0.381163	0.057	0.045	1	CD4 Trm	Polr3gl
Rbm17	0.00262715	0.206708	0.194	0.173	1	CD4 Trm	Rbm17
Stk38	0.00263129	0.225519	0.112	0.095	1	CD4 Trm	Stk38
Plekha1	0.00269115	0.484115	0.037	0.027	1	CD4 Trm	Plekha1
Edem1	0.00275463	0.149776	0.273	0.249	1	CD4 Trm	Edem1
Sae1	0.00279043	0.28121	0.095	0.079	1	CD4 Trm	Sae1
Slamf6	0.00281915	0.430052	0.07	0.057	1	CD4 Trm	Slamf6
Hdac7	0.00283215	0.311398	0.083	0.068	1	CD4 Trm	Hdac7
Tuba1a	0.00283397	0.187742	0.178	0.157	1	CD4 Trm	Tuba1a
Klk1b27	0.00283705	0.530441	0.017	0.01	1	CD4 Trm	Klk1b27
Heph	0.00286357	0.167101	0.291	0.268	1	CD4 Trm	Heph
Rprd2	0.00287302	0.252723	0.143	0.125	1	CD4 Trm	Rprd2
Xaf1	0.00293112	0.299251	0.067	0.054	1	CD4 Trm	Xaf1
Cmc2	0.00294391	0.210135	0.137	0.118	1	CD4 Trm	Cmc2
Iglv1	0.0029521	0.249603	0.071	0.057	1	CD4 Trm	Iglv1
Gimap1os	0.0029786	0.421739	0.043	0.032	1	CD4 Trm	Gimap1os
Trim34a	0.0030051	0.554278	0.026	0.018	1	CD4 Trm	Trim34a
Hsd17b7	0.00304758	0.554672	0.034	0.024	1	CD4 Trm	Hsd17b7
E030030I06Rik	0.00310574	0.482726	0.027	0.019	1	CD4 Trm	E030030I06Rik
Gm20139	0.00312638	0.589318	0.029	0.02	1	CD4 Trm	Gm20139
Cpd	0.00314314	0.242293	0.137	0.12	1	CD4 Trm	Cpd
Copb1	0.00314917	0.153191	0.217	0.194	1	CD4 Trm	Copb1
Dedd2	0.00316788	0.30251	0.079	0.065	1	CD4 Trm	Dedd2
Ptk2b	0.00317699	0.124853	0.354	0.331	1	CD4 Trm	Ptk2b
Slc37a1	0.00323098	0.50973	0.033	0.024	1	CD4 Trm	Slc37a1
Mterf3	0.00323112	0.281819	0.071	0.057	1	CD4 Trm	Mterf3
Sos2	0.00324186	0.327448	0.061	0.048	1	CD4 Trm	Sos2
Hist1h3e	0.00324589	0.770435	0.013	0.007	1	CD4 Trm	Hist1h3e
Ensa	0.00325421	0.19722	0.181	0.161	1	CD4 Trm	Ensa
Ppargc1b	0.00326425	0.809963	0.017	0.01	1	CD4 Trm	Ppargc1b
Ppil4	0.00333346	0.214434	0.178	0.159	1	CD4 Trm	Ppil4
Tbc1d22b	0.00333833	0.331277	0.064	0.052	1	CD4 Trm	Tbc1d22b
Ifih1	0.00335589	0.277051	0.064	0.051	1	CD4 Trm	Ifih1
Orc2	0.00336279	0.410286	0.05	0.039	1	CD4 Trm	Orc2
Trim56	0.00337541	0.369028	0.072	0.059	1	CD4 Trm	Trim56
Gm26740	0.00340459	0.117408	0.424	0.398	1	CD4 Trm	Gm26740
Tmem9b	0.0034175	0.167009	0.217	0.196	1	CD4 Trm	Tmem9b
Srp68	0.0034944	0.275855	0.079	0.065	1	CD4 Trm	Srp68
Ripk1	0.00350008	0.300158	0.072	0.058	1	CD4 Trm	Ripk1
Fip1l1	0.00352015	0.202111	0.175	0.155	1	CD4 Trm	Fip1l1
Magohb	0.00362406	0.327073	0.05	0.039	1	CD4 Trm	Magohb
Rapgef1	0.00365206	0.225243	0.119	0.102	1	CD4 Trm	Rapgef1
Gm15918	0.00376161	0.875993	0.012	0.007	1	CD4 Trm	Gm15918
Ska2	0.00387259	0.806211	0.012	0.007	1	CD4 Trm	Ska2
Cdc7	0.00389973	0.735195	0.017	0.011	1	CD4 Trm	Cdc7
Ms4a6d	0.00390255	0.596008	0.018	0.011	1	CD4 Trm	Ms4a6d
Ankrd13a	0.00390957	0.229266	0.136	0.118	1	CD4 Trm	Ankrd13a
Hspd1	0.00390996	0.217972	0.275	0.253	1	CD4 Trm	Hspd1
Tceanc2	0.00391481	0.506651	0.029	0.021	1	CD4 Trm	Tceanc2
Hspb11	0.00396262	0.54508	0.037	0.027	1	CD4 Trm	Hspb11
Spata13	0.00398114	0.297873	0.066	0.053	1	CD4 Trm	Spata13
Stat4	0.00406529	0.136856	0.375	0.35	1	CD4 Trm	Stat4
Dnaja4	0.00407525	0.25671	0.059	0.047	1	CD4 Trm	Dnaja4
1810044D09Rik	0.00410192	0.953196	0.01	0.005	1	CD4 Trm	1810044D09Rik
1700084C06Rik	0.00412885	0.884868	0.01	0.005	1	CD4 Trm	1700084C06Rik
Shoc2	0.00415005	0.240699	0.103	0.087	1	CD4 Trm	Shoc2
Idh3a	0.00423153	0.278275	0.116	0.1	1	CD4 Trm	Idh3a
Arid2	0.00423472	0.387621	0.07	0.057	1	CD4 Trm	Arid2
Rab8b	0.00424309	0.112338	0.48	0.458	1	CD4 Trm	Rab8b
Cenpv	0.00428155	0.424061	0.04	0.03	1	CD4 Trm	Cenpv
Prpf38a	0.0042837	0.209596	0.113	0.096	1	CD4 Trm	Prpf38a
Tbc1d17	0.00430245	0.368794	0.042	0.031	1	CD4 Trm	Tbc1d17
Mvk	0.00430891	0.489694	0.057	0.045	1	CD4 Trm	Mvk
Gm5547	0.00432742	0.238184	0.069	0.056	1	CD4 Trm	Gm5547
Eri1	0.00443286	0.261598	0.103	0.088	1	CD4 Trm	Eri1
Mospd1	0.00450035	0.595335	0.021	0.014	1	CD4 Trm	Mospd1
Dgkd	0.00456026	0.227716	0.087	0.072	1	CD4 Trm	Dgkd
Ubp1	0.00457706	0.238693	0.097	0.082	1	CD4 Trm	Ubp1
Hps5	0.00457714	0.521954	0.03	0.022	1	CD4 Trm	Hps5
Ggt5	0.00463139	0.579666	0.017	0.011	1	CD4 Trm	Ggt5
Pkn2	0.00467334	0.204969	0.151	0.133	1	CD4 Trm	Pkn2
Rad9a	0.00473513	0.606871	0.017	0.01	1	CD4 Trm	Rad9a
AW011738	0.00474862	0.226253	0.143	0.126	1	CD4 Trm	AW011738
Avl9	0.00475491	0.255614	0.108	0.092	1	CD4 Trm	Avl9
Heatr5a	0.00475846	0.679839	0.013	0.007	1	CD4 Trm	Heatr5a
Jun	0.00480183	0.136338	0.685	0.667	1	CD4 Trm	Jun
Ddx28	0.00482937	0.338253	0.043	0.033	1	CD4 Trm	Ddx28
Tmem65	0.00485713	0.36932	0.062	0.05	1	CD4 Trm	Tmem65
Lsp1	0.00486818	0.114918	0.48	0.457	1	CD4 Trm	Lsp1
Taf15	0.00488663	0.209841	0.179	0.16	1	CD4 Trm	Taf15
Ipcef1	0.00489913	0.192444	0.135	0.117	1	CD4 Trm	Ipcef1
Mcm7	0.00494825	0.242818	0.064	0.052	1	CD4 Trm	Mcm7
Cd2bp2	0.00498767	0.265316	0.093	0.078	1	CD4 Trm	Cd2bp2
Phip	0.00499208	0.209176	0.138	0.121	1	CD4 Trm	Phip
Dse	0.00504085	0.97202	0.01	0.005	1	CD4 Trm	Dse
Senp2	0.0050436	0.209448	0.125	0.109	1	CD4 Trm	Senp2
Gm19585	0.0051166	0.186343	0.21	0.19	1	CD4 Trm	Gm19585
Gpn3	0.00512962	0.205869	0.144	0.127	1	CD4 Trm	Gpn3
Nup88	0.0051404	0.243616	0.094	0.08	1	CD4 Trm	Nup88
Gga1	0.00517084	0.269002	0.086	0.072	1	CD4 Trm	Gga1
Scly	0.00522443	0.299416	0.075	0.062	1	CD4 Trm	Scly
Araf	0.00522551	0.197917	0.165	0.146	1	CD4 Trm	Araf
Mrtfa	0.00523689	0.299403	0.084	0.07	1	CD4 Trm	Mrtfa
Emg1	0.00525261	0.130457	0.373	0.352	1	CD4 Trm	Emg1
Abraxas2	0.00527324	0.419953	0.038	0.028	1	CD4 Trm	Abraxas2
Cic	0.00533664	0.256785	0.072	0.059	1	CD4 Trm	Cic
Ankrd26	0.00533743	0.445951	0.028	0.02	1	CD4 Trm	Ankrd26
Igsf8	0.0054639	0.316793	0.088	0.074	1	CD4 Trm	Igsf8
Prex1	0.00547255	0.170606	0.252	0.231	1	CD4 Trm	Prex1
Gm50069	0.00549332	0.88969	0.011	0.006	1	CD4 Trm	Gm50069
Psmb10	0.00553897	0.130566	0.254	0.232	1	CD4 Trm	Psmb10
A930024E05Rik	0.00555605	0.350532	0.064	0.052	1	CD4 Trm	A930024E05Rik
Cdyl2	0.0057801	0.382953	0.029	0.021	1	CD4 Trm	Cdyl2
Arhgap30	0.00590112	0.188541	0.187	0.168	1	CD4 Trm	Arhgap30
Lyst	0.00590556	0.419996	0.052	0.041	1	CD4 Trm	Lyst
Senp7	0.00591953	0.33885	0.072	0.059	1	CD4 Trm	Senp7
Gm44066	0.00593147	0.62355	0.018	0.012	1	CD4 Trm	Gm44066
Pola2	0.00593505	0.485328	0.027	0.019	1	CD4 Trm	Pola2
Nvl	0.00594894	0.29539	0.065	0.053	1	CD4 Trm	Nvl
Tab2	0.00601462	0.126349	0.334	0.311	1	CD4 Trm	Tab2
Ccnd3	0.006051	0.164692	0.193	0.174	1	CD4 Trm	Ccnd3
Cd3g	0.00609899	0.1007	0.67	0.659	1	CD4 Trm	Cd3g
Pdik1l	0.00621876	0.682728	0.017	0.011	1	CD4 Trm	Pdik1l
Phf12	0.00627136	0.271097	0.095	0.081	1	CD4 Trm	Phf12
Tra2a	0.0063201	0.158045	0.241	0.22	1	CD4 Trm	Tra2a
Mrps35	0.00632595	0.311086	0.056	0.045	1	CD4 Trm	Mrps35
Map2k7	0.00633334	0.350532	0.064	0.052	1	CD4 Trm	Map2k7
Zmym1	0.00639688	0.516269	0.031	0.023	1	CD4 Trm	Zmym1
Ttc1	0.00640423	0.257203	0.099	0.084	1	CD4 Trm	Ttc1
Snai3	0.00640898	0.560567	0.02	0.013	1	CD4 Trm	Snai3
Ipp	0.00644593	0.661733	0.017	0.011	1	CD4 Trm	Ipp
Rev1	0.00644948	0.44003	0.032	0.023	1	CD4 Trm	Rev1
Frg1	0.00651545	0.204932	0.21	0.191	1	CD4 Trm	Frg1
A930007I19Rik	0.00651887	0.677894	0.016	0.01	1	CD4 Trm	A930007I19Rik
Ndc80	0.00658268	0.705374	0.016	0.01	1	CD4 Trm	Ndc80
Kdm7a	0.00664795	0.200516	0.184	0.165	1	CD4 Trm	Kdm7a
Asb13	0.00667031	0.537232	0.022	0.015	1	CD4 Trm	Asb13
Mark2	0.00668678	0.188754	0.189	0.17	1	CD4 Trm	Mark2
Llgl2	0.00670114	0.759922	0.011	0.006	1	CD4 Trm	Llgl2
Phlpp2	0.00671333	0.749081	0.015	0.009	1	CD4 Trm	Phlpp2
Hmgxb4	0.00683752	0.416219	0.04	0.031	1	CD4 Trm	Hmgxb4
Errfi1	0.00684058	0.19209	0.105	0.09	1	CD4 Trm	Errfi1
Ube2h	0.00684087	0.207557	0.184	0.166	1	CD4 Trm	Ube2h
Irgm1	0.00685013	0.253464	0.064	0.052	1	CD4 Trm	Irgm1
Keap1	0.00690557	0.345461	0.066	0.054	1	CD4 Trm	Keap1
Trmt13	0.00692804	0.429244	0.028	0.02	1	CD4 Trm	Trmt13
Dcaf8	0.006974	0.212267	0.122	0.106	1	CD4 Trm	Dcaf8
Lias	0.0069891	0.367057	0.053	0.042	1	CD4 Trm	Lias
Rnf34	0.00702676	0.386752	0.058	0.047	1	CD4 Trm	Rnf34
Camsap2	0.00703349	0.556982	0.023	0.016	1	CD4 Trm	Camsap2
Smndc1	0.00710279	0.1556	0.252	0.232	1	CD4 Trm	Smndc1
Zbtb11	0.0071595	0.289412	0.099	0.085	1	CD4 Trm	Zbtb11
Paip2b	0.00717353	0.347857	0.066	0.054	1	CD4 Trm	Paip2b
Bcl7a	0.00749151	0.710074	0.016	0.011	1	CD4 Trm	Bcl7a
Ppp4r3a	0.00751349	0.188998	0.143	0.126	1	CD4 Trm	Ppp4r3a
Dock11	0.00758148	0.215203	0.108	0.093	1	CD4 Trm	Dock11
Elac1	0.00767078	0.559985	0.019	0.013	1	CD4 Trm	Elac1
Pcyt2	0.00769073	0.375811	0.049	0.039	1	CD4 Trm	Pcyt2
Ddi2	0.00775402	0.340336	0.052	0.041	1	CD4 Trm	Ddi2
Myh9	0.00781002	0.118972	0.452	0.435	1	CD4 Trm	Myh9
Sugct	0.00781885	0.346332	0.044	0.034	1	CD4 Trm	Sugct
Ly9	0.00788144	0.175763	0.188	0.17	1	CD4 Trm	Ly9
Ksr1	0.00796446	0.440729	0.048	0.038	1	CD4 Trm	Ksr1
Per1	0.00796996	0.123855	0.395	0.373	1	CD4 Trm	Per1
Gon4l	0.00799621	0.2494	0.114	0.098	1	CD4 Trm	Gon4l
Kbtbd2	0.0080511	0.361338	0.065	0.053	1	CD4 Trm	Kbtbd2
4930549P19Rik	0.00809642	0.841518	0.011	0.007	1	CD4 Trm	4930549P19Rik
Aptx	0.00817197	0.423288	0.037	0.028	1	CD4 Trm	Aptx
Trmu	0.00819605	0.734447	0.013	0.008	1	CD4 Trm	Trmu
Wdyhv1	0.00820107	0.294994	0.076	0.063	1	CD4 Trm	Wdyhv1
Myo6	0.00820765	0.521518	0.034	0.026	1	CD4 Trm	Myo6
Bola1	0.00822124	0.413176	0.041	0.032	1	CD4 Trm	Bola1
Fam122a	0.00824686	0.329263	0.05	0.04	1	CD4 Trm	Fam122a
Myb	0.00824791	0.606186	0.013	0.008	1	CD4 Trm	Myb
Sh3glb1	0.00835442	0.112284	0.358	0.335	1	CD4 Trm	Sh3glb1
Gm46210	0.00835577	0.520457	0.012	0.007	1	CD4 Trm	Gm46210
Trbv2	0.00840307	0.640038	0.02	0.013	1	CD4 Trm	Trbv2
Chd3	0.00841838	0.126416	0.391	0.369	1	CD4 Trm	Chd3
Dnaja2	0.00844802	0.125252	0.292	0.271	1	CD4 Trm	Dnaja2
Cdk10	0.00848741	0.57856	0.022	0.015	1	CD4 Trm	Cdk10
Leng9	0.00852491	0.35393	0.052	0.042	1	CD4 Trm	Leng9
Ccnq	0.00860665	0.278261	0.07	0.058	1	CD4 Trm	Ccnq
Ubqln2	0.00865647	0.268667	0.097	0.083	1	CD4 Trm	Ubqln2
Mrps18b	0.00871629	0.31359	0.043	0.034	1	CD4 Trm	Mrps18b
Anapc15	0.00881034	0.534956	0.028	0.02	1	CD4 Trm	Anapc15
Cd8b1	0.00893726	0.815038	0.03	0.022	1	CD4 Trm	Cd8b1
Ubr2	0.00901594	0.250456	0.189	0.172	1	CD4 Trm	Ubr2
Pias1	0.00901932	0.22336	0.106	0.091	1	CD4 Trm	Pias1
Rgs14	0.00904897	0.275243	0.069	0.057	1	CD4 Trm	Rgs14
1110012L19Rik	0.00908607	0.370996	0.051	0.041	1	CD4 Trm	1110012L19Rik
Zfp251	0.00916144	0.784627	0.015	0.01	1	CD4 Trm	Zfp251
Srp72	0.00917123	0.190027	0.207	0.189	1	CD4 Trm	Srp72
Rnf157	0.009189	0.225464	0.162	0.145	1	CD4 Trm	Rnf157
Stau2	0.00922715	0.567762	0.022	0.016	1	CD4 Trm	Stau2
Gbp2	0.00926955	0.44751	0.127	0.112	1	CD4 Trm	Gbp2
Txlng	0.00928444	0.209762	0.087	0.073	1	CD4 Trm	Txlng
Tnfrsf26	0.00933193	0.791104	0.01	0.005	1	CD4 Trm	Tnfrsf26
Clps	0.00935573	0.637921	0.022	0.015	1	CD4 Trm	Clps
Hdgfl2	0.00939702	0.226847	0.095	0.081	1	CD4 Trm	Hdgfl2
Maea	0.00950138	0.184238	0.11	0.095	1	CD4 Trm	Maea
Kptn	0.00958905	0.439432	0.031	0.023	1	CD4 Trm	Kptn
Ablim2	0.00964159	0.813932	0.011	0.006	1	CD4 Trm	Ablim2
Ankrd46	0.00969086	0.583192	0.023	0.016	1	CD4 Trm	Ankrd46
Nsun6	0.00970148	0.427554	0.038	0.03	1	CD4 Trm	Nsun6
Trappc8	0.00974791	0.253119	0.066	0.055	1	CD4 Trm	Trappc8
Tent4a	0.00975795	0.418038	0.041	0.032	1	CD4 Trm	Tent4a
Gm28960	0.00976083	0.701029	0.013	0.008	1	CD4 Trm	Gm28960
Btbd19	0.00980711	0.350532	0.039	0.03	1	CD4 Trm	Btbd19
Itsn2	0.0098543	0.133929	0.27	0.25	1	CD4 Trm	Itsn2
Ddx19a	0.00987813	0.312894	0.056	0.045	1	CD4 Trm	Ddx19a
Pdcd6ip	0.00993475	0.118161	0.334	0.313	1	CD4 Trm	Pdcd6ip
Socs2	0	3.51166	0.694	0.113	0	Th2	Socs2
Il17rb	0	4.33539	0.57	0.054	0	Th2	Il17rb
Calca	0	4.1623	0.526	0.066	0	Th2	Calca
Il4	0	3.74669	0.46	0.042	0	Th2	Il4
Lgals7	0	4.38445	0.279	0.019	0	Th2	Lgals7
1700061F12Rik	0	4.57391	0.26	0.013	0	Th2	1700061F12Rik
Deptor	0	5.25607	0.245	0.008	0	Th2	Deptor
Slc7a8	0	6.00633	0.165	0.003	0	Th2	Slc7a8
Hes1	1.98974e-303	4.99475	0.247	0.016	2.88214e-299	Th2	Hes1
Epas1	2.63254e-299	2.52019	0.628	0.147	3.81323e-295	Th2	Epas1
Ptpn13	4.31957e-267	3.16946	0.432	0.074	6.25689e-263	Th2	Ptpn13
Hs3st1	7.17365e-255	4.76189	0.249	0.022	1.0391e-250	Th2	Hs3st1
Gata3	4.83149e-194	2.15816	0.511	0.136	6.99841e-190	Th2	Gata3
Serinc3	1.54038e-192	1.50589	0.896	0.593	2.23125e-188	Th2	Serinc3
Spcs3	8.68929e-190	2.31582	0.507	0.142	1.25864e-185	Th2	Spcs3
Hba-a1	4.15155e-170	5.94744	0.095	0.002	6.01352e-166	Th2	Hba-a1
Ifitm2	3.74824e-161	2.73344	0.334	0.07	5.42933e-157	Th2	Ifitm2
Ccl1	3.52743e-159	3.92257	0.149	0.012	5.10948e-155	Th2	Ccl1
Cpne7	1.89785e-158	3.26937	0.203	0.025	2.74904e-154	Th2	Cpne7
Il5	5.82162e-155	6.03421	0.095	0.003	8.43261e-151	Th2	Il5
Nsg2	3.18246e-149	3.17332	0.19	0.023	4.60979e-145	Th2	Nsg2
Sub1	2.69434e-147	1.10005	0.962	0.859	3.90275e-143	Th2	Sub1
Nxpe4	4.36196e-147	4.88434	0.091	0.003	6.3183e-143	Th2	Nxpe4
Gm20627	6.89882e-145	5.51628	0.08	0.002	9.99295e-141	Th2	Gm20627
Il13	1.93283e-144	4.96363	0.104	0.005	2.79971e-140	Th2	Il13
Chdh	1.51553e-142	3.96062	0.124	0.009	2.19524e-138	Th2	Chdh
Akr1c12	1.38017e-135	4.94744	0.083	0.003	1.99918e-131	Th2	Akr1c12
Pard3	1.61808e-132	3.23962	0.162	0.018	2.34378e-128	Th2	Pard3
Ppp2r3a	2.15459e-129	3.95693	0.113	0.008	3.12092e-125	Th2	Ppp2r3a
Rps9	2.11545e-119	0.55035	1	0.994	3.06422e-115	Th2	Rps9
Rpl13	2.18555e-117	0.512503	1	0.999	3.16577e-113	Th2	Rpl13
Abhd17c	4.13307e-112	1.80409	0.474	0.175	5.98675e-108	Th2	Abhd17c
Gm47599	4.30309e-110	4.59587	0.074	0.003	6.23302e-106	Th2	Gm47599
Prxl2a	4.55507e-110	2.99051	0.16	0.022	6.59802e-106	Th2	Prxl2a
Rpl37a	8.12205e-110	0.532471	0.999	0.991	1.17648e-105	Th2	Rpl37a
Rgs2	2.47671e-109	1.13643	0.873	0.64	3.58752e-105	Th2	Rgs2
Ptgir	2.36588e-108	4.31404	0.082	0.005	3.42698e-104	Th2	Ptgir
Il9r	1.65044e-105	2.67511	0.201	0.037	2.39067e-101	Th2	Il9r
Sox8	1.28323e-102	8.07672	0.042	0	1.85876e-98	Th2	Sox8
Rplp2	3.47201e-100	0.467398	1	0.997	5.0292e-96	Th2	Rplp2
Acbd7	7.25081e-100	3.29571	0.127	0.015	1.05028e-95	Th2	Acbd7
Nmur1	3.95338e-99	5.00633	0.06	0.002	5.72647e-95	Th2	Nmur1
Tnfaip8	3.3699e-95	1.38422	0.685	0.394	4.8813e-91	Th2	Tnfaip8
Pparg	1.87089e-94	4.86128	0.055	0.002	2.70999e-90	Th2	Pparg
Ipmk	1.89497e-92	1.87153	0.404	0.149	2.74487e-88	Th2	Ipmk
Enpp4	3.63474e-91	2.24304	0.236	0.057	5.26492e-87	Th2	Enpp4
Rnf128	5.34544e-90	2.64546	0.173	0.032	7.74287e-86	Th2	Rnf128
Elf1	6.12336e-90	0.936076	0.876	0.653	8.86968e-86	Th2	Elf1
Rps18	1.13173e-85	0.518789	0.997	0.98	1.63931e-81	Th2	Rps18
Rpsa	3.38346e-84	0.548429	0.997	0.959	4.90094e-80	Th2	Rpsa
Rps24	1.21436e-83	0.438626	0.999	0.999	1.759e-79	Th2	Rps24
Samsn1	8.83709e-82	0.839528	0.88	0.657	1.28005e-77	Th2	Samsn1
Dusp10	1.52326e-81	1.27752	0.627	0.346	2.20644e-77	Th2	Dusp10
Prc1	1.82221e-81	3.08381	0.123	0.018	2.63947e-77	Th2	Prc1
Vipr2	2.81329e-81	3.42137	0.09	0.009	4.07505e-77	Th2	Vipr2
Rps6	7.76802e-81	0.502586	0.993	0.98	1.1252e-76	Th2	Rps6
Il6	9.74477e-81	5.3089	0.059	0.003	1.41153e-76	Th2	Il6
Gm42031	2.10305e-78	2.71757	0.143	0.025	3.04626e-74	Th2	Gm42031
Lgmn	1.15084e-76	2.84195	0.138	0.024	1.66699e-72	Th2	Lgmn
Paxbp1	1.22732e-75	1.30103	0.519	0.247	1.77777e-71	Th2	Paxbp1
Rpl23	2.78829e-74	0.44932	0.997	0.988	4.03883e-70	Th2	Rpl23
Serp1	3.24534e-74	1.29088	0.603	0.344	4.70088e-70	Th2	Serp1
Rab4a	1.88059e-73	2.45255	0.148	0.028	2.72403e-69	Th2	Rab4a
Cd200r1	3.29833e-70	2.12895	0.208	0.055	4.77763e-66	Th2	Cd200r1
Lpcat4	3.84569e-70	2.39068	0.181	0.043	5.57048e-66	Th2	Lpcat4
Aff4	5.3107e-67	1.26714	0.527	0.274	7.69255e-63	Th2	Aff4
Blvrb	4.25015e-66	2.9888	0.088	0.011	6.15635e-62	Th2	Blvrb
Tmem64	4.46791e-66	1.05808	0.58	0.31	6.47177e-62	Th2	Tmem64
Rps271	2.37687e-65	0.393753	1	0.995	3.4429e-61	Th2	Rps27
Zeb2	3.2217e-65	2.26007	0.153	0.033	4.66664e-61	Th2	Zeb2
Rps19	8.95732e-65	0.515216	0.978	0.946	1.29747e-60	Th2	Rps19
Rpl5	2.0138e-64	0.42634	0.999	0.989	2.91699e-60	Th2	Rpl5
Rplp1	2.82913e-64	0.442707	1	0.999	4.09799e-60	Th2	Rplp1
Sh3bgrl3	1.05225e-63	0.836952	0.843	0.672	1.52419e-59	Th2	Sh3bgrl3
Rps7	2.642e-62	0.43978	0.997	0.988	3.82693e-58	Th2	Rps7
4930503L19Rik	5.02387e-62	1.31781	0.472	0.237	7.27708e-58	Th2	4930503L19Rik
Rps3	8.85554e-62	0.41495	0.997	0.987	1.28273e-57	Th2	Rps3
Hilpda	1.48843e-61	1.34105	0.59	0.35	2.15599e-57	Th2	Hilpda
Rps161	1.31354e-60	0.382355	0.999	0.996	1.90267e-56	Th2	Rps16
Ppfibp2	5.94521e-60	3.87388	0.056	0.004	8.61163e-56	Th2	Ppfibp2
Rpl32	1.74706e-58	0.413566	0.999	0.991	2.53062e-54	Th2	Rpl32
Rpl23a	2.45589e-58	0.39825	0.998	0.988	3.55736e-54	Th2	Rpl23a
Nrip1	3.73533e-58	0.786077	0.8	0.594	5.41062e-54	Th2	Nrip1
Itgb3	4.21655e-58	1.49287	0.351	0.15	6.10767e-54	Th2	Itgb3
Rpl18a	9.14475e-58	0.35148	1	0.998	1.32462e-53	Th2	Rpl18a
Eef1a1	1.08076e-57	0.27193	1	1	1.56548e-53	Th2	Eef1a1
Rpl27a	2.25172e-57	0.411886	0.997	0.986	3.26162e-53	Th2	Rpl27a
Rps23	2.96417e-57	0.34207	1	0.998	4.2936e-53	Th2	Rps23
2810468N07Rik	1.05707e-56	4.57749	0.039	0.002	1.53117e-52	Th2	2810468N07Rik
Rpl10	1.90837e-56	0.483973	0.986	0.948	2.76428e-52	Th2	Rpl10
Lmo4	3.84225e-56	1.30015	0.514	0.291	5.56549e-52	Th2	Lmo4
Rps12	6.42856e-56	0.456017	0.99	0.962	9.31176e-52	Th2	Rps12
Avil	8.35487e-56	4.83125	0.031	0.001	1.2102e-51	Th2	Avil
Rpl9	9.55965e-56	0.370227	0.997	0.989	1.38471e-51	Th2	Rpl9
Ugcg	2.68622e-55	1.70525	0.221	0.071	3.89099e-51	Th2	Ugcg
Ero1l	2.86441e-55	1.5175	0.333	0.141	4.14909e-51	Th2	Ero1l
Gm973	4.95794e-55	5.08296	0.03	0.001	7.18158e-51	Th2	Gm973
Rpl14	5.44048e-55	0.455549	0.982	0.941	7.88053e-51	Th2	Rpl14
Rps3a1	7.40385e-55	0.378961	0.995	0.987	1.07245e-50	Th2	Rps3a1
Tspan13	1.15639e-54	0.977796	0.672	0.446	1.67503e-50	Th2	Tspan13
Rps21	2.33727e-54	0.431752	0.989	0.957	3.38553e-50	Th2	Rps21
Otulinl	2.75328e-54	1.58291	0.29	0.113	3.98813e-50	Th2	Otulinl
Suco	6.51533e-54	1.30815	0.477	0.257	9.43746e-50	Th2	Suco
Rps5	4.25087e-53	0.4127	0.989	0.964	6.15739e-49	Th2	Rps5
Frmd4b	6.35989e-53	1.57561	0.333	0.145	9.21231e-49	Th2	Frmd4b
Rpl36a	9.33721e-53	0.646282	0.886	0.773	1.35249e-48	Th2	Rpl36a
Bcl21	5.58896e-51	1.12605	0.437	0.219	8.0956e-47	Th2	Bcl2
Zfp981	3.34504e-50	2.62028	0.091	0.016	4.84529e-46	Th2	Zfp981
Rpl17	6.57682e-50	0.329152	1	0.996	9.52653e-46	Th2	Rpl17
Fgl2	1.0112e-49	1.25814	0.366	0.17	1.46472e-45	Th2	Fgl2
Rps20	4.32756e-49	0.438736	0.982	0.949	6.26847e-45	Th2	Rps20
Ly6a	1.61811e-48	1.00575	0.446	0.229	2.34383e-44	Th2	Ly6a
5730420D15Rik	2.48828e-47	4.9068	0.029	0.001	3.60427e-43	Th2	5730420D15Rik
Bcap31	5.45898e-47	1.09611	0.46	0.253	7.90733e-43	Th2	Bcap31
Rps8	1.99875e-45	0.443472	0.969	0.929	2.89519e-41	Th2	Rps8
Rad50	2.01326e-45	1.68597	0.202	0.069	2.91621e-41	Th2	Rad50
Basp1	8.78909e-45	2.78119	0.096	0.019	1.2731e-40	Th2	Basp1
Bzw2	1.92229e-44	1.09638	0.446	0.243	2.78444e-40	Th2	Bzw2
Rpl39	7.51954e-44	0.385951	0.978	0.948	1.08921e-39	Th2	Rpl39
Cd40lg1	1.04813e-43	1.01957	0.499	0.291	1.51822e-39	Th2	Cd40lg
Tiparp	1.17096e-43	1.19915	0.399	0.207	1.69613e-39	Th2	Tiparp
Nr3c1	1.81171e-42	0.650318	0.81	0.653	2.62426e-38	Th2	Nr3c1
Fosb	2.78376e-42	0.743417	0.755	0.584	4.03227e-38	Th2	Fosb
Ccdc184	5.78819e-42	2.2452	0.098	0.021	8.3842e-38	Th2	Ccdc184
4932438H23Rik	8.35504e-42	2.05104	0.119	0.03	1.21023e-37	Th2	4932438H23Rik
Specc1	2.57941e-41	3.21352	0.051	0.006	3.73628e-37	Th2	Specc1
Nedd9	6.15999e-41	1.08933	0.461	0.267	8.92275e-37	Th2	Nedd9
Bmpr2	1.24623e-40	2.36248	0.088	0.018	1.80516e-36	Th2	Bmpr2
Ldha	2.30678e-40	0.944074	0.615	0.425	3.34137e-36	Th2	Ldha
Selenot	8.39059e-40	0.983472	0.499	0.306	1.21538e-35	Th2	Selenot
Tpt1	1.07205e-39	0.251128	1	1	1.55286e-35	Th2	Tpt1
Ifngr2	3.73816e-39	1.96004	0.138	0.041	5.41472e-35	Th2	Ifngr2
Rps4x	4.44102e-39	0.35493	0.989	0.98	6.43281e-35	Th2	Rps4x
Rpl81	5.45111e-39	0.412551	0.969	0.916	7.89594e-35	Th2	Rpl8
Fos1	8.18818e-39	0.563556	0.93	0.859	1.18606e-34	Th2	Fos
Arhgap18	9.21574e-39	1.48169	0.211	0.081	1.3349e-34	Th2	Arhgap18
Rpl121	1.02893e-38	0.404177	0.971	0.947	1.4904e-34	Th2	Rpl12
Mvb12b	1.73133e-38	1.38467	0.241	0.1	2.50784e-34	Th2	Mvb12b
Map4k3	3.24841e-37	2.15957	0.096	0.022	4.70532e-33	Th2	Map4k3
Spry1	3.6683e-37	2.0697	0.106	0.027	5.31354e-33	Th2	Spry1
Asb5	5.98425e-37	3.42807	0.038	0.003	8.66819e-33	Th2	Asb5
Rps14	2.51935e-36	0.282664	0.999	0.997	3.64927e-32	Th2	Rps14
Rps111	4.22336e-36	0.308961	0.997	0.984	6.11754e-32	Th2	Rps11
Dkk3	4.26993e-36	2.12667	0.099	0.024	6.18499e-32	Th2	Dkk3
Rpl19	1.86124e-35	0.310992	0.994	0.99	2.69601e-31	Th2	Rpl19
Amph	1.17039e-34	3.02651	0.046	0.006	1.69532e-30	Th2	Amph
Rplp01	3.95602e-34	0.312186	0.999	0.992	5.73029e-30	Th2	Rplp0
Itm2c	4.29283e-34	0.858815	0.538	0.357	6.21816e-30	Th2	Itm2c
Tph1	4.9354e-34	4.5469	0.027	0.002	7.14893e-30	Th2	Tph1
Zrsr1	6.79494e-34	1.40932	0.231	0.101	9.84246e-30	Th2	Zrsr1
Rps15	6.8e-34	0.347566	0.989	0.958	9.8498e-30	Th2	Rps15
Lpar6	5.43633e-33	1.48005	0.209	0.087	7.87453e-29	Th2	Lpar6
Gm26834	1.42347e-32	4.96451	0.018	0.001	2.0619e-28	Th2	Gm26834
Rpl26	1.53087e-32	0.371692	0.975	0.932	2.21747e-28	Th2	Rpl26
Uba521	1.70565e-32	0.394325	0.937	0.859	2.47063e-28	Th2	Uba52
Rps27a	1.81333e-32	0.304832	0.995	0.985	2.62661e-28	Th2	Rps27a
Spty2d1	2.8414e-32	1.17926	0.47	0.309	4.11576e-28	Th2	Spty2d1
Rpl27	6.71529e-32	0.302562	0.993	0.988	9.7271e-28	Th2	Rpl27
Nck2	7.93873e-32	2.07487	0.094	0.024	1.14993e-27	Th2	Nck2
Rps291	8.9359e-32	0.30927	0.992	0.973	1.29436e-27	Th2	Rps29
Rpl21	1.05643e-31	0.352794	0.974	0.933	1.53024e-27	Th2	Rpl21
Rps2	1.12525e-31	0.311705	0.993	0.982	1.62992e-27	Th2	Rps2
Cysltr1	1.47275e-31	1.95247	0.099	0.027	2.13328e-27	Th2	Cysltr1
Rab27b	1.55049e-31	3.3551	0.033	0.003	2.24588e-27	Th2	Rab27b
Plac81	3.53217e-31	0.911465	0.315	0.161	5.11634e-27	Th2	Plac8
Akr1c13	4.32821e-31	2.15459	0.079	0.018	6.26941e-27	Th2	Akr1c13
Rps13	1.47496e-30	0.310261	0.989	0.973	2.13648e-26	Th2	Rps13
Radx	5.19424e-30	4.96451	0.017	0.001	7.52385e-26	Th2	Radx
Gcnt1	1.67254e-29	2.31704	0.083	0.021	2.42267e-25	Th2	Gcnt1
B630019A10Rik	2.76525e-29	3.73885	0.026	0.002	4.00547e-25	Th2	B630019A10Rik
Fbxl21	3.26498e-29	2.56893	0.055	0.01	4.72932e-25	Th2	Fbxl21
Eef1b2	4.16083e-29	0.52653	0.806	0.687	6.02696e-25	Th2	Eef1b2
Malt1	4.4129e-29	0.99039	0.417	0.26	6.39209e-25	Th2	Malt1
Grin2d	5.75931e-29	3.12641	0.036	0.004	8.34235e-25	Th2	Grin2d
Rbpj	1.3174e-28	0.962427	0.353	0.201	1.90825e-24	Th2	Rbpj
Fam184b	1.56502e-28	3.30332	0.036	0.005	2.26693e-24	Th2	Fam184b
Chn21	1.60773e-28	1.20572	0.216	0.097	2.3288e-24	Th2	Chn2
Rpl36	2.0469e-28	0.385701	0.937	0.866	2.96494e-24	Th2	Rpl36
Mras	2.14999e-28	2.80224	0.047	0.008	3.11426e-24	Th2	Mras
Aldh2	2.43424e-28	2.70089	0.046	0.007	3.526e-24	Th2	Aldh2
Slc2a8	4.72472e-28	1.76446	0.095	0.027	6.84375e-24	Th2	Slc2a8
Ctsd	7.67336e-28	0.993819	0.33	0.183	1.11149e-23	Th2	Ctsd
Rpl30	1.90865e-27	0.273655	0.995	0.985	2.76468e-23	Th2	Rpl30
Padi2	4.01122e-27	1.25708	0.186	0.079	5.81025e-23	Th2	Padi2
Galc	7.24803e-27	1.75	0.094	0.027	1.04988e-22	Th2	Galc
Rpl34	9.13234e-27	0.270812	0.995	0.986	1.32282e-22	Th2	Rpl34
Rps10	1.21025e-26	0.355938	0.937	0.889	1.75305e-22	Th2	Rps10
Tmem273	1.23375e-26	1.53757	0.13	0.047	1.78708e-22	Th2	Tmem273
Nedd4	1.26533e-26	1.19871	0.185	0.079	1.83283e-22	Th2	Nedd4
Litaf1	1.64594e-26	0.720331	0.431	0.266	2.38414e-22	Th2	Litaf
Rpl18	7.5938e-26	0.289886	0.99	0.961	1.09996e-21	Th2	Rpl18
Rpl6	1.53876e-25	0.307585	0.973	0.957	2.2289e-21	Th2	Rpl6
Gm2a	2.96643e-25	1.03834	0.34	0.202	4.29688e-21	Th2	Gm2a
Cd52	2.52075e-24	0.514809	0.79	0.678	3.65131e-20	Th2	Cd52
Eef1g	2.91462e-24	0.582179	0.651	0.504	4.22183e-20	Th2	Eef1g
Rpl10a	5.99467e-24	0.342008	0.934	0.884	8.68327e-20	Th2	Rpl10a
Gm13219	6.38901e-24	2.6313	0.04	0.007	9.25448e-20	Th2	Gm13219
Rpl7a	6.54486e-24	0.329892	0.959	0.904	9.48023e-20	Th2	Rpl7a
Il2	7.54398e-24	1.58487	0.101	0.034	1.09274e-19	Th2	Il2
Rack1	1.19615e-23	0.32174	0.936	0.886	1.73263e-19	Th2	Rack1
Cd47	1.3175e-23	0.725167	0.499	0.344	1.90839e-19	Th2	Cd47
Vars	1.35701e-23	0.954014	0.284	0.156	1.96563e-19	Th2	Vars
Pgm2l1	1.37739e-23	1.00478	0.259	0.136	1.99514e-19	Th2	Pgm2l1
Rpl33	1.78648e-23	0.32937	0.948	0.89	2.58772e-19	Th2	Rpl3
Kif3a	6.85474e-23	2.12498	0.067	0.018	9.92909e-19	Th2	Kif3a
Fau	8.7447e-23	0.220887	0.999	0.997	1.26667e-18	Th2	Fau
Rpl29	9.32801e-23	0.341692	0.92	0.866	1.35116e-18	Th2	Rpl29
2610507B11Rik	2.85182e-22	1.13936	0.177	0.081	4.13086e-18	Th2	2610507B11Rik
Pnn	1.03012e-21	0.857887	0.352	0.218	1.49212e-17	Th2	Pnn
St6galnac5	1.68588e-21	3.18191	0.024	0.003	2.44199e-17	Th2	St6galnac5
Rpl4	2.47038e-21	0.297029	0.964	0.924	3.57834e-17	Th2	Rpl4
Tagln2	3.5047e-21	0.506702	0.625	0.471	5.07655e-17	Th2	Tagln2
Rpl38	4.16454e-21	0.339346	0.901	0.843	6.03233e-17	Th2	Rpl38
Ell2	4.50138e-21	0.701186	0.454	0.316	6.52025e-17	Th2	Ell2
9230102O04Rik	7.68552e-21	2.6355	0.032	0.005	1.11325e-16	Th2	9230102O04Rik
Rpl15	1.20901e-20	0.284191	0.967	0.942	1.75126e-16	Th2	Rpl15
Fosl2	1.21799e-20	0.561152	0.579	0.433	1.76426e-16	Th2	Fosl2
Csf2	1.4958e-20	2.28522	0.148	0.067	2.16666e-16	Th2	Csf2
Rps17	1.84804e-20	0.39965	0.846	0.757	2.67689e-16	Th2	Rps17
Anks6	1.98473e-20	3.18191	0.024	0.003	2.87488e-16	Th2	Anks6
Rpl35	3.89047e-20	0.453759	0.751	0.645	5.63535e-16	Th2	Rpl35
Heph1	4.34475e-20	0.658607	0.414	0.271	6.29337e-16	Th2	Heph
Galnt3	4.88677e-20	4.57749	0.013	0.001	7.07849e-16	Th2	Galnt3
Rps28	6.4718e-20	0.366558	0.88	0.806	9.3744e-16	Th2	Rps28
Gpx4	8.77623e-20	0.521539	0.67	0.533	1.27124e-15	Th2	Gpx4
Atp8a21	9.03081e-20	1.20465	0.161	0.075	1.30811e-15	Th2	Atp8a2
Dst	1.45995e-19	1.4911	0.116	0.047	2.11474e-15	Th2	Dst
Tmsb4x	1.77346e-19	0.186502	1	1	2.56886e-15	Th2	Tmsb4x
Rpl7	1.96885e-19	0.258187	0.981	0.945	2.85188e-15	Th2	Rpl7
Pcsk1	2.79662e-19	2.51448	0.04	0.008	4.05091e-15	Th2	Pcsk1
Baz1a	3.00492e-19	0.891704	0.319	0.199	4.35262e-15	Th2	Baz1a
Sorl11	4.29304e-19	0.851584	0.311	0.192	6.21847e-15	Th2	Sorl1
Rpl11	5.82921e-19	0.226101	0.997	0.983	8.44362e-15	Th2	Rpl11
Tnfrsf11a	9.28407e-19	4.49176	0.013	0.001	1.3448e-14	Th2	Tnfrsf11a
Stt3b	1.44143e-18	1.11358	0.179	0.089	2.08791e-14	Th2	Stt3b
Ern1	2.01836e-18	0.773111	0.338	0.213	2.92359e-14	Th2	Ern1
Hectd2	2.35639e-18	1.51662	0.08	0.027	3.41322e-14	Th2	Hectd2
Gm17745	2.81798e-18	1.94247	0.056	0.015	4.08184e-14	Th2	Gm17745
Mat2a	2.97984e-18	0.661837	0.501	0.372	4.3163e-14	Th2	Mat2a
Tspan32	5.28217e-18	1.22498	0.132	0.058	7.65123e-14	Th2	Tspan32
Efcc1	5.42265e-18	4.19898	0.01	0	7.85471e-14	Th2	Efcc1
Rps26	7.34766e-18	0.299789	0.958	0.926	1.06431e-13	Th2	Rps26
Prodh	1.23716e-17	2.78629	0.024	0.003	1.79203e-13	Th2	Prodh
Myo61	1.30446e-17	1.66227	0.079	0.027	1.88952e-13	Th2	Myo6
Gpnmb	1.78011e-17	2.26937	0.04	0.009	2.57849e-13	Th2	Gpnmb
Rpl22	5.81104e-17	0.310056	0.911	0.854	8.41729e-13	Th2	Rpl22
Ythdc1	5.87074e-17	0.571426	0.511	0.381	8.50377e-13	Th2	Ythdc1
Irf2bp2	6.41629e-17	0.901741	0.233	0.133	9.29399e-13	Th2	Irf2bp2
Dennd4a	9.03421e-17	0.495329	0.595	0.47	1.30861e-12	Th2	Dennd4a
Tor1aip2	1.58443e-16	1.01034	0.294	0.19	2.29504e-12	Th2	Tor1aip2
Itm2b	1.96277e-16	0.280342	0.957	0.917	2.84308e-12	Th2	Itm2b
Taldo1	1.97758e-16	0.669988	0.428	0.305	2.86452e-12	Th2	Taldo1
Gm26708	2.97561e-16	3.42137	0.016	0.002	4.31017e-12	Th2	Gm26708
Inpp4b	3.25079e-16	0.649295	0.437	0.316	4.70876e-12	Th2	Inpp4b
Rasgrp4	3.93676e-16	1.80371	0.06	0.019	5.7024e-12	Th2	Rasgrp4
Tbca	4.35438e-16	0.570111	0.505	0.384	6.30732e-12	Th2	Tbca
Csf1	4.43548e-16	2.28387	0.026	0.004	6.42479e-12	Th2	Csf1
Rpl35a	6.61882e-16	0.264934	0.949	0.909	9.58737e-12	Th2	Rpl35a
Map1lc3a	9.65133e-16	1.09546	0.163	0.084	1.398e-11	Th2	Map1lc3a
Eef2	9.94011e-16	0.265917	0.918	0.877	1.43982e-11	Th2	Eef2
Itgb1	9.99094e-16	1.15058	0.129	0.06	1.44719e-11	Th2	Itgb1
Runx3	1.04374e-15	0.615076	0.448	0.323	1.51185e-11	Th2	Runx3
Epb41l1	1.28543e-15	3.29209	0.016	0.002	1.86195e-11	Th2	Epb41l1
Cacna1d	2.00595e-15	2.65793	0.025	0.004	2.90562e-11	Th2	Cacna1d
Olfr9	2.68958e-15	4.19898	0.01	0.001	3.89585e-11	Th2	Olfr9
Abcb1b1	2.95754e-15	0.866304	0.266	0.164	4.28399e-11	Th2	Abcb1b
Gm20186	4.21063e-15	0.805226	0.455	0.346	6.0991e-11	Th2	Gm20186
Abhd14a	8.2459e-15	1.76602	0.051	0.015	1.19442e-10	Th2	Abhd14a
Pabpc1	8.94646e-15	0.245463	0.961	0.937	1.29589e-10	Th2	Pabpc1
Tent5a	1.15197e-14	0.500363	0.288	0.179	1.66863e-10	Th2	Tent5a
Zdhhc23	1.51072e-14	1.04196	0.145	0.073	2.18827e-10	Th2	Zdhhc23
Gm5127	1.70781e-14	2.20867	0.032	0.007	2.47377e-10	Th2	Gm5127
Mtmr10	1.98847e-14	2.12693	0.046	0.013	2.8803e-10	Th2	Mtmr10
AU020206	2.96134e-14	0.452155	0.579	0.457	4.2895e-10	Th2	AU020206
Gm41414	3.12054e-14	2.60034	0.025	0.005	4.52011e-10	Th2	Gm41414
Mgat5	3.12175e-14	0.937638	0.186	0.104	4.52186e-10	Th2	Mgat5
Hba-a2	3.33437e-14	4.14384	0.01	0.001	4.82984e-10	Th2	Hba-a2
Gpr65	4.54697e-14	0.675667	0.445	0.337	6.58628e-10	Th2	Gpr65
Rps251	4.83806e-14	0.26582	0.908	0.851	7.00794e-10	Th2	Rps25
Mns11	5.54984e-14	1.31068	0.088	0.036	8.03895e-10	Th2	Mns1
Esyt2	8.19823e-14	0.616524	0.388	0.277	1.18751e-09	Th2	Esyt2
Tespa1	8.35248e-14	0.757394	0.282	0.182	1.20986e-09	Th2	Tespa1
Npnt	8.93761e-14	1.53404	0.062	0.021	1.29461e-09	Th2	Npnt
Kmo	2.21781e-13	2.84487	0.019	0.003	3.2125e-09	Th2	Kmo
Zfp652	2.25626e-13	0.873695	0.179	0.1	3.26819e-09	Th2	Zfp652
Mxi1	2.47244e-13	0.761904	0.254	0.16	3.58134e-09	Th2	Mxi1
Plxnc1	2.5035e-13	1.7676	0.055	0.018	3.62632e-09	Th2	Plxnc1
Rps15a	2.75444e-13	0.153287	0.999	0.998	3.9898e-09	Th2	Rps15a
Khdc1a	3.36643e-13	2.91389	0.017	0.002	4.87628e-09	Th2	Khdc1a
Klf4	3.59817e-13	0.664235	0.301	0.199	5.21195e-09	Th2	Klf4
Rpl31	4.28476e-13	0.291028	0.873	0.827	6.20647e-09	Th2	Rpl31
Jak2	4.84024e-13	0.433817	0.544	0.424	7.01109e-09	Th2	Jak2
Arl6ip5	5.53882e-13	0.575764	0.423	0.314	8.02298e-09	Th2	Arl6ip5
Neurl31	9.71445e-13	0.299409	0.869	0.769	1.40714e-08	Th2	Neurl3
Lif	1.39494e-12	2.08174	0.027	0.006	2.02056e-08	Th2	Lif
Cops9	2.38929e-12	0.637195	0.319	0.219	3.46088e-08	Th2	Cops9
Rnf130	2.81042e-12	0.959514	0.153	0.084	4.0709e-08	Th2	Rnf130
Lyn	3.20852e-12	1.16875	0.132	0.069	4.64754e-08	Th2	Lyn
Acer2	3.299e-12	2.16735	0.029	0.007	4.77861e-08	Th2	Acer2
Tmem50a	6.28991e-12	0.47188	0.507	0.401	9.11093e-08	Th2	Tmem50a
Crebl2	9.79959e-12	1.32486	0.059	0.022	1.41947e-07	Th2	Crebl2
Ikbip	1.2499e-11	1.93547	0.035	0.01	1.81047e-07	Th2	Ikbip
Mfge8	1.52952e-11	1.6313	0.043	0.014	2.2155e-07	Th2	Mfge8
Rb1	1.60729e-11	0.685165	0.229	0.145	2.32816e-07	Th2	Rb1
Rnd3	1.71871e-11	3.59694	0.011	0.001	2.48954e-07	Th2	Rnd3
Pkdcc	1.73843e-11	3.33648	0.011	0.001	2.51811e-07	Th2	Pkdcc
Tfcp2	1.74274e-11	1.79905	0.038	0.011	2.52436e-07	Th2	Tfcp2
Rpl37	1.87773e-11	0.209125	0.951	0.935	2.71989e-07	Th2	Rpl37
Sc5d1	2.69126e-11	0.886995	0.185	0.111	3.8983e-07	Th2	Sc5d
Tsc22d3	4.80413e-11	0.479636	0.494	0.396	6.95879e-07	Th2	Tsc22d3
Faah	4.81049e-11	0.901799	0.13	0.07	6.968e-07	Th2	Faah
Ptpn9	5.07928e-11	1.10755	0.114	0.059	7.35733e-07	Th2	Ptpn9
Prkcb	5.10193e-11	0.766271	0.195	0.119	7.39015e-07	Th2	Prkcb
Fhl2	5.48269e-11	1.2048	0.072	0.03	7.94168e-07	Th2	Fhl2
Gabarapl21	6.09184e-11	0.396106	0.576	0.466	8.82403e-07	Th2	Gabarapl2
Pde7b	6.58355e-11	1.46014	0.049	0.017	9.53627e-07	Th2	Pde7b
Ecm1	6.64501e-11	1.22789	0.082	0.037	9.62529e-07	Th2	Ecm1
Ccnd2	8.32551e-11	0.352072	0.55	0.434	1.20595e-06	Th2	Ccnd2
Ptma	8.83308e-11	0.19571	0.968	0.95	1.27947e-06	Th2	Ptma
Irs2	1.13133e-10	0.939495	0.144	0.081	1.63873e-06	Th2	Irs2
Aldoa	1.21256e-10	0.485126	0.475	0.38	1.75639e-06	Th2	Aldoa
Mboat1	1.25014e-10	1.75064	0.04	0.013	1.81083e-06	Th2	Mboat1
Zfp516	1.3003e-10	2.00323	0.029	0.007	1.88348e-06	Th2	Zfp516
Churc1	1.3229e-10	0.685046	0.249	0.166	1.91623e-06	Th2	Churc1
Tprgl	1.33923e-10	0.551084	0.335	0.24	1.93988e-06	Th2	Tprgl
Dusp1	1.42155e-10	0.276396	0.867	0.805	2.05912e-06	Th2	Dusp1
Klk8	1.51821e-10	0.664277	0.237	0.155	2.19913e-06	Th2	Klk8
Kcnn4	1.55321e-10	0.844012	0.12	0.063	2.24983e-06	Th2	Kcnn4
Nuak2	1.5623e-10	3.02144	0.013	0.002	2.26299e-06	Th2	Nuak2
Ndfip1	1.75478e-10	0.271527	0.807	0.742	2.5418e-06	Th2	Ndfip1
Ercc6l2	1.79548e-10	1.1295	0.092	0.045	2.60076e-06	Th2	Ercc6l2
Tanc2	2.02879e-10	1.89386	0.034	0.01	2.9387e-06	Th2	Tanc2
A630072M18Rik	2.03873e-10	1.33281	0.071	0.031	2.9531e-06	Th2	A630072M18Rik
Spns3	2.27371e-10	3.26937	0.011	0.001	3.29346e-06	Th2	Spns3
2510009E07Rik	2.28801e-10	2.14009	0.025	0.006	3.31418e-06	Th2	2510009E07Rik
Cnot6l	2.85673e-10	0.482955	0.413	0.315	4.13797e-06	Th2	Cnot6l
Npm1	3.51826e-10	0.17746	0.895	0.842	5.0962e-06	Th2	Npm1
Icosl	3.94709e-10	1.54513	0.041	0.014	5.71736e-06	Th2	Icosl
Tnfrsf18	4.65999e-10	0.198503	0.586	0.462	6.75e-06	Th2	Tnfrsf18
Rpl9-ps6	5.97902e-10	0.69446	0.211	0.136	8.66061e-06	Th2	Rpl9-ps6
Tmem30a	6.05045e-10	0.576557	0.326	0.237	8.76408e-06	Th2	Tmem30a
Rabac1	7.39942e-10	0.406643	0.555	0.462	1.07181e-05	Th2	Rabac1
A630001O12Rik	7.66761e-10	2.19898	0.021	0.004	1.11065e-05	Th2	A630001O12Rik
Rpl28	7.89499e-10	0.273506	0.826	0.773	1.14359e-05	Th2	Rpl28
Eef1d	8.12724e-10	0.454529	0.452	0.358	1.17723e-05	Th2	Eef1d
Ramp3	8.63628e-10	0.184437	0.781	0.657	1.25096e-05	Th2	Ramp3
Rgs12	9.05285e-10	2.00633	0.026	0.007	1.31131e-05	Th2	Rgs12
Plxdc2	1.03098e-09	1.09345	0.081	0.038	1.49337e-05	Th2	Plxdc2
P4ha2	1.07391e-09	2.44048	0.018	0.004	1.55556e-05	Th2	P4ha2
Sdf2	1.07415e-09	0.586975	0.246	0.166	1.55591e-05	Th2	Sdf2
Rpl13a1	1.09042e-09	0.25461	0.721	0.628	1.57948e-05	Th2	Rpl13a
Vps37b1	1.09918e-09	0.243486	0.921	0.891	1.59216e-05	Th2	Vps37b
Mir142hg1	1.19233e-09	0.419693	0.523	0.425	1.72709e-05	Th2	Mir142hg
Kifap3	1.24382e-09	1.80246	0.033	0.01	1.80168e-05	Th2	Kifap3
Gvin1	1.25016e-09	1.26626	0.063	0.027	1.81085e-05	Th2	Gvin1
Tbx211	1.31398e-09	0.942475	0.129	0.073	1.9033e-05	Th2	Tbx21
Emc7	1.60022e-09	0.600663	0.267	0.185	2.31792e-05	Th2	Emc7
Utrn	1.62724e-09	0.507857	0.304	0.217	2.35705e-05	Th2	Utrn
Rps27rt	1.64488e-09	0.779403	0.158	0.095	2.38261e-05	Th2	Rps27rt
Klf61	2.18194e-09	0.271165	0.735	0.654	3.16054e-05	Th2	Klf6
Ahr1	2.19491e-09	0.662154	0.179	0.111	3.17933e-05	Th2	Ahr
Kcnq5	2.61445e-09	0.994279	0.1	0.053	3.78702e-05	Th2	Kcnq5
Nop53	3.71704e-09	0.31957	0.632	0.542	5.38414e-05	Th2	Nop53
Prdm2	4.16822e-09	0.728289	0.212	0.142	6.03766e-05	Th2	Prdm2
Aplp2	4.17013e-09	0.577338	0.403	0.322	6.04044e-05	Th2	Aplp2
Cntn1	4.46912e-09	1.88604	0.024	0.006	6.47352e-05	Th2	Cntn1
Snapc1	4.85197e-09	0.800059	0.161	0.099	7.02807e-05	Th2	Snapc1
Lhfpl3	5.42166e-09	2.87705	0.011	0.002	7.85328e-05	Th2	Lhfpl3
Cox7a2l	6.09755e-09	0.336451	0.575	0.478	8.8323e-05	Th2	Cox7a2l
Spcs2	6.15971e-09	0.374948	0.572	0.495	8.92234e-05	Th2	Spcs2
Alpk2	6.63184e-09	1.9521	0.029	0.008	9.60623e-05	Th2	Alpk2
Pdia3	7.04853e-09	0.304077	0.68	0.605	0.000102098	Th2	Pdia3
Herc4	7.15077e-09	0.789662	0.16	0.099	0.000103579	Th2	Herc4
Ywhab	8.63019e-09	0.460678	0.372	0.284	0.000125008	Th2	Ywhab
Sulf21	1.0007e-08	1.32757	0.049	0.02	0.000144952	Th2	Sulf2
Lgals9	1.09234e-08	0.559608	0.249	0.172	0.000158225	Th2	Lgals9
Lamp1	1.12264e-08	0.528715	0.247	0.171	0.000162614	Th2	Lamp1
Gm10076	1.39957e-08	0.471173	0.36	0.275	0.000202727	Th2	Gm10076
Slc35g1	1.45476e-08	1.7288	0.032	0.01	0.000210722	Th2	Slc35g1
Tmem170b	1.46725e-08	1.18833	0.056	0.024	0.000212531	Th2	Tmem170b
Dennd5a	1.8241e-08	0.549787	0.222	0.151	0.000264222	Th2	Dennd5a
Nfkbiz	1.83648e-08	0.381272	0.611	0.541	0.000266014	Th2	Nfkbiz
Rpl36al	2.11999e-08	0.294058	0.603	0.511	0.000307081	Th2	Rpl36al
Ppp1r15a	2.14749e-08	0.259654	0.818	0.76	0.000311064	Th2	Ppp1r15a
mt-Atp6	2.26746e-08	0.13409	0.998	0.998	0.000328442	Th2	mt-Atp6
Iqgap2	2.29749e-08	0.574211	0.195	0.128	0.000332791	Th2	Iqgap2
Pygl	2.31872e-08	1.27841	0.043	0.017	0.000335867	Th2	Pygl
Ms4a6c	2.40944e-08	1.22112	0.064	0.03	0.000349007	Th2	Ms4a6c
Stx3	2.60014e-08	2.83641	0.01	0.001	0.000376631	Th2	Stx3
Ift20	2.83371e-08	0.597898	0.228	0.156	0.000410463	Th2	Ift20
Jdp2	2.83843e-08	1.67202	0.031	0.01	0.000411146	Th2	Jdp2
Tuba1b	3.04329e-08	0.495003	0.317	0.237	0.00044082	Th2	Tuba1b
Rbfa	3.17666e-08	0.681887	0.141	0.086	0.00046014	Th2	Rbfa
Ccdc171	3.42246e-08	1.39654	0.055	0.024	0.000495744	Th2	Ccdc171
Crem	3.66451e-08	0.292089	0.821	0.762	0.000530804	Th2	Crem
Tubb4b	3.69937e-08	0.624091	0.247	0.176	0.000535854	Th2	Tubb4b
Ppp1r14b	4.38421e-08	0.647473	0.172	0.111	0.000635053	Th2	Ppp1r14b
Myadm	5.12266e-08	1.57905	0.033	0.011	0.000742017	Th2	Myadm
Arsk	5.54559e-08	1.55665	0.03	0.01	0.000803279	Th2	Arsk
Cdk11b	5.75651e-08	0.49346	0.481	0.401	0.000833831	Th2	Cdk11b
Atp8a1	6.1443e-08	0.94447	0.096	0.052	0.000890002	Th2	Atp8a1
Fkbp5	6.37269e-08	0.66147	0.181	0.12	0.000923085	Th2	Fkbp5
Prnp	6.5582e-08	1.37955	0.036	0.013	0.000949956	Th2	Prnp
Galnt12	7.10547e-08	0.911053	0.094	0.051	0.00102923	Th2	Galnt12
Prkcq1	8.09653e-08	0.692078	0.16	0.102	0.00117278	Th2	Prkcq
Tmem106b	8.14088e-08	0.930528	0.103	0.058	0.00117921	Th2	Tmem106b
Opa3	8.29544e-08	0.854557	0.1	0.056	0.00120159	Th2	Opa3
Pdcd1lg2	8.82484e-08	0.665348	0.172	0.112	0.00127828	Th2	Pdcd1lg2
Rrm2b	9.39768e-08	0.57375	0.201	0.136	0.00136125	Th2	Rrm2b
Gm45717	9.92613e-08	2.24383	0.015	0.003	0.0014378	Th2	Gm45717
Ifitm31	1.07774e-07	1.11929	0.051	0.022	0.0015611	Th2	Ifitm3
Ankrd50	1.15164e-07	1.20636	0.056	0.025	0.00166816	Th2	Ankrd50
Herc1	1.20878e-07	0.47076	0.25	0.177	0.00175092	Th2	Herc1
Csf2ra	1.26022e-07	1.44155	0.033	0.012	0.00182542	Th2	Csf2ra
Sv2c	1.27742e-07	1.22046	0.056	0.026	0.00185035	Th2	Sv2c
Cnnm2	1.28115e-07	0.952603	0.081	0.043	0.00185574	Th2	Cnnm2
Ctsc	1.29354e-07	0.622931	0.182	0.122	0.00187369	Th2	Ctsc
Klf13	1.5481e-07	0.299941	0.567	0.481	0.00224242	Th2	Klf13
Kdelr1	1.6412e-07	0.621164	0.201	0.138	0.00237728	Th2	Kdelr1
Exoc3	1.75181e-07	0.4605	0.271	0.198	0.0025375	Th2	Exoc3
Gm26917	2.03026e-07	0.672765	0.115	0.068	0.00294083	Th2	Gm26917
AW0117381	2.03098e-07	0.635336	0.194	0.132	0.00294187	Th2	AW011738
AC149090.1	2.08899e-07	0.54287	0.361	0.288	0.0030259	Th2	AC149090.1
Synj1	2.3845e-07	0.855059	0.095	0.053	0.00345395	Th2	Synj1
Cptp	2.7285e-07	2.01698	0.018	0.005	0.00395223	Th2	Cptp
Cldnd1	2.80482e-07	0.433123	0.247	0.177	0.00406278	Th2	Cldnd1
Dnajc6	2.86166e-07	1.29033	0.041	0.017	0.00414511	Th2	Dnajc6
Rcn2	3.1414e-07	0.644878	0.129	0.079	0.00455031	Th2	Rcn2
Alad	3.3666e-07	1.001	0.064	0.031	0.00487652	Th2	Alad
Swap70	3.54284e-07	0.948378	0.072	0.037	0.0051318	Th2	Swap70
Kmt2c	3.68563e-07	0.493628	0.263	0.192	0.00533864	Th2	Kmt2c
Nek7	3.73197e-07	0.672147	0.217	0.155	0.00540576	Th2	Nek7
Gnai3	3.89792e-07	0.508841	0.279	0.209	0.00564613	Th2	Gnai3
Catsperd	3.905e-07	2.07435	0.018	0.005	0.0056564	Th2	Catsperd
Mettl7a1	3.91563e-07	1.04254	0.062	0.03	0.00567178	Th2	Mettl7a1
Ndufa4	4.20335e-07	0.350718	0.509	0.431	0.00608856	Th2	Ndufa4
Sesn1	4.92749e-07	0.844386	0.119	0.073	0.00713748	Th2	Sesn1
Lmna	4.96014e-07	0.583947	0.146	0.093	0.00718477	Th2	Lmna
Xist	5.28051e-07	0.372977	0.502	0.424	0.00764882	Th2	Xist
Os9	5.43446e-07	0.419764	0.353	0.277	0.00787182	Th2	Os9
Hspa4	5.53432e-07	0.371374	0.369	0.29	0.00801646	Th2	Hspa4
Plaur	6.2054e-07	1.69835	0.024	0.008	0.00898853	Th2	Plaur
Ncoa2	6.23508e-07	0.620354	0.186	0.128	0.00903151	Th2	Ncoa2
Hist1h2bc	6.26064e-07	1.23842	0.043	0.019	0.00906853	Th2	Hist1h2bc
Gm34006	6.57329e-07	2.61402	0.015	0.003	0.00952141	Th2	Gm34006
Itk1	6.60868e-07	0.337221	0.659	0.591	0.00957267	Th2	Itk
mt-Nd4l	6.86545e-07	0.409429	0.358	0.282	0.00994461	Th2	mt-Nd4l
Sik1	7.6936e-07	0.467582	0.274	0.204	0.0111442	Th2	Sik1
Oip5os1	7.81408e-07	0.573453	0.172	0.116	0.0113187	Th2	Oip5os1
Uhrf2	8.04406e-07	0.358208	0.384	0.306	0.0116518	Th2	Uhrf2
Itgb7	8.42994e-07	0.340071	0.523	0.448	0.0122108	Th2	Itgb7
Selenok	8.7446e-07	0.241374	0.686	0.616	0.0126665	Th2	Selenok
Olfr10331	9.23538e-07	0.449762	0.327	0.255	0.0133774	Th2	Olfr1033
Fam102a1	9.65371e-07	0.488127	0.221	0.158	0.0139834	Th2	Fam102a
Sp1101	1.09156e-06	0.384549	0.287	0.215	0.0158113	Th2	Sp110
Pmm2	1.09923e-06	0.804367	0.097	0.057	0.0159223	Th2	Pmm2
2700097O09Rik	1.12635e-06	1.15685	0.048	0.022	0.0163152	Th2	2700097O09Rik
Gm11944	1.17526e-06	2.09944	0.014	0.003	0.0170236	Th2	Gm11944
Grcc10	1.17939e-06	0.481552	0.228	0.165	0.0170835	Th2	Grcc10
Aprt	1.30398e-06	0.459758	0.307	0.238	0.0188882	Th2	Aprt
Senp1	1.35054e-06	0.991694	0.117	0.074	0.0195626	Th2	Senp1
Lrrk1	1.46701e-06	1.49372	0.025	0.009	0.0212497	Th2	Lrrk1
Atf3	1.5031e-06	0.52951	0.243	0.179	0.0217724	Th2	Atf3
Tep1	1.58886e-06	1.14835	0.062	0.031	0.0230147	Th2	Tep1
Klhl5	1.65835e-06	1.11262	0.055	0.027	0.0240212	Th2	Klhl5
P4hb	1.66287e-06	0.492388	0.235	0.172	0.0240866	Th2	P4hb
Pwwp3a	1.66624e-06	0.712277	0.104	0.062	0.0241354	Th2	Pwwp3a
H2-Oa	1.74936e-06	1.37955	0.033	0.013	0.0253395	Th2	H2-Oa
Dnal4	1.81685e-06	1.49176	0.029	0.01	0.0263171	Th2	Dnal4
Cntrl	1.83925e-06	0.397455	0.295	0.225	0.0266416	Th2	Cntrl
Lcp21	1.90221e-06	0.31508	0.603	0.543	0.0275535	Th2	Lcp2
Tpi1	1.94835e-06	0.784934	0.103	0.062	0.0282219	Th2	Tpi1
Igsf5	2.35032e-06	2.01765	0.029	0.011	0.0340444	Th2	Igsf5
Pdgfrb	2.36064e-06	2.15716	0.015	0.004	0.0341939	Th2	Pdgfrb
St6gal1	2.40932e-06	1.11806	0.051	0.025	0.034899	Th2	St6gal1
Impact	2.42181e-06	0.72065	0.127	0.081	0.0350799	Th2	Impact
Pik3ap1	2.58613e-06	0.889409	0.068	0.037	0.0374601	Th2	Pik3ap1
Dipk1a	2.59213e-06	0.860657	0.076	0.042	0.037547	Th2	Dipk1a
Ccn4	2.63178e-06	1.43107	0.041	0.018	0.0381214	Th2	Ccn4
Tmx2	2.65077e-06	0.897552	0.082	0.047	0.0383963	Th2	Tmx2
Rpl41	3.09908e-06	0.138385	0.971	0.969	0.0448902	Th2	Rpl41
Rab11fip5	3.10809e-06	2.33648	0.011	0.002	0.0450206	Th2	Rab11fip5
Trio	3.13732e-06	0.922098	0.078	0.043	0.045444	Th2	Trio
Plcb3	3.24791e-06	1.60099	0.023	0.008	0.047046	Th2	Plcb3
Hadh	3.27758e-06	0.688848	0.124	0.08	0.0474758	Th2	Hadh
Abcb9	3.65603e-06	0.73403	0.113	0.071	0.0529575	Th2	Abcb9
Adrb2	4.30155e-06	0.788825	0.101	0.062	0.0623079	Th2	Adrb2
Edil3	4.76394e-06	2.00633	0.01	0.002	0.0690057	Th2	Edil3
Colgalt1	4.82007e-06	1.03096	0.05	0.024	0.0698187	Th2	Colgalt1
Scyl3	4.9519e-06	0.81314	0.084	0.049	0.0717283	Th2	Scyl3
Pcmt1	5.47175e-06	0.520945	0.174	0.122	0.0792582	Th2	Pcmt1
Hexa	5.77126e-06	0.73021	0.086	0.05	0.0835967	Th2	Hexa
Gm20388	5.86619e-06	0.471029	0.246	0.186	0.0849717	Th2	Gm20388
Nptn	6.16178e-06	0.49976	0.242	0.182	0.0892534	Th2	Nptn
Impg1	7.61829e-06	1.96451	0.016	0.005	0.110351	Th2	Impg1
Ifitm101	7.66733e-06	1.6681	0.022	0.007	0.111061	Th2	Ifitm10
Per3	8.10212e-06	1.50753	0.024	0.009	0.117359	Th2	Per3
Pfdn51	8.24705e-06	0.19221	0.693	0.629	0.119459	Th2	Pfdn5
Calm3	8.42206e-06	0.397917	0.261	0.198	0.121994	Th2	Calm3
Chd7	8.50656e-06	0.475053	0.307	0.246	0.123218	Th2	Chd7
Gm11998	8.51593e-06	2.09944	0.011	0.003	0.123353	Th2	Gm11998
Gbp21	8.52082e-06	0.433699	0.168	0.117	0.123424	Th2	Gbp2
Hist3h2a	8.52103e-06	0.598701	0.135	0.089	0.123427	Th2	Hist3h2a
B4galt5	8.58237e-06	1.52598	0.027	0.011	0.124316	Th2	B4galt5
Ighm	9.33235e-06	0.120435	0.204	0.144	0.135179	Th2	Ighm
Plcl1	9.51602e-06	1.37775	0.021	0.007	0.13784	Th2	Plcl1
Nudt3	9.81549e-06	0.705896	0.099	0.061	0.142177	Th2	Nudt3
Mettl26	1.01271e-05	0.733718	0.094	0.057	0.146691	Th2	Mettl26
Pgrmc1	1.05864e-05	0.47047	0.17	0.119	0.153343	Th2	Pgrmc1
Ly6e	1.1184e-05	0.115122	0.936	0.892	0.162	Th2	Ly6e
Pik3ip11	1.19295e-05	0.918872	0.064	0.035	0.172798	Th2	Pik3ip1
Rab11a	1.26079e-05	0.429119	0.275	0.214	0.182625	Th2	Rab11a
Apobec3	1.32764e-05	0.444843	0.293	0.232	0.192308	Th2	Apobec3
Ivns1abp	1.36042e-05	0.389839	0.308	0.244	0.197056	Th2	Ivns1abp
Rab23	1.37551e-05	1.89299	0.014	0.004	0.199242	Th2	Rab23
Kyat3	1.39983e-05	2.25145	0.01	0.002	0.202766	Th2	Kyat3
Carhsp1	1.45327e-05	0.869622	0.082	0.049	0.210506	Th2	Carhsp1
Gnaq	1.47574e-05	0.888765	0.056	0.029	0.213761	Th2	Gnaq
Pik3r51	1.49356e-05	0.59653	0.178	0.129	0.216343	Th2	Pik3r5
Cybb	1.52156e-05	0.986744	0.07	0.04	0.220398	Th2	Cybb
Selenow	1.5651e-05	0.307643	0.55	0.489	0.226704	Th2	Selenow
Ffar2	1.64553e-05	0.458739	0.099	0.061	0.238354	Th2	Ffar2
Tmem50b	1.64564e-05	0.84087	0.084	0.051	0.23837	Th2	Tmem50b
Pttg1ip	1.67863e-05	0.578462	0.147	0.101	0.24315	Th2	Pttg1ip
Rpl10-ps3	1.68989e-05	0.517825	0.194	0.142	0.244781	Th2	Rpl10-ps3
Dusp11	1.75086e-05	0.42639	0.254	0.194	0.253613	Th2	Dusp11
Afdn	1.83109e-05	1.14599	0.041	0.02	0.265233	Th2	Afdn
Acp5	1.8788e-05	0.504129	0.202	0.149	0.272144	Th2	Acp5
Psd3	1.88666e-05	1.52214	0.022	0.008	0.273282	Th2	Psd3
Ifnar1	1.93433e-05	0.439249	0.23	0.173	0.280188	Th2	Ifnar1
Siah2	1.93829e-05	0.502131	0.164	0.116	0.280762	Th2	Siah2
Igfbp4	1.98822e-05	1.93898	0.015	0.004	0.287994	Th2	Igfbp4
Ptpn18	2.00552e-05	0.259689	0.56	0.49	0.2905	Th2	Ptpn18
Gkap1	2.03236e-05	1.20089	0.03	0.012	0.294387	Th2	Gkap1
Lyst1	2.12402e-05	0.850624	0.078	0.046	0.307664	Th2	Lyst
Nsmf	2.14967e-05	1.40284	0.029	0.012	0.311379	Th2	Nsmf
4930549P19Rik1	2.23487e-05	1.53936	0.023	0.008	0.323721	Th2	4930549P19Rik
Trbv12-2	2.25599e-05	1.48711	0.026	0.01	0.32678	Th2	Trbv12-2
Phlda3	2.26322e-05	2.57749	0.01	0.002	0.327827	Th2	Phlda3
Gm26759	2.30458e-05	1.37565	0.023	0.008	0.333818	Th2	Gm26759
Vmn2r96	2.54788e-05	1.94744	0.013	0.003	0.369061	Th2	Vmn2r96
Ahnak	2.58711e-05	0.263656	0.528	0.461	0.374743	Th2	Ahnak
Ikbkb	2.58894e-05	0.437176	0.209	0.154	0.375008	Th2	Ikbkb
Ccdc1361	2.72993e-05	1.49537	0.023	0.009	0.39543	Th2	Ccdc136
Rps6ka5	3.00712e-05	1.37213	0.03	0.013	0.435582	Th2	Rps6ka5
Smdt1	3.13509e-05	0.326755	0.322	0.257	0.454118	Th2	Smdt1
Hmbox1	3.26613e-05	0.963726	0.05	0.026	0.473098	Th2	Hmbox1
Rpl22l1	3.27681e-05	0.174652	0.774	0.71	0.474645	Th2	Rpl22l1
Glul	3.3347e-05	0.554854	0.145	0.1	0.483032	Th2	Glul
Gm12454	3.64743e-05	2.14835	0.01	0.002	0.52833	Th2	Gm12454
Cep85	3.85059e-05	0.883407	0.065	0.037	0.557758	Th2	Cep85
Mtap	4.08573e-05	0.793036	0.08	0.048	0.591818	Th2	Mtap
Irak3	4.18542e-05	0.60952	0.113	0.075	0.606259	Th2	Irak3
Cyp2d22	4.496e-05	1.6371	0.016	0.005	0.651245	Th2	Cyp2d22
Chrne	4.5123e-05	0.777516	0.071	0.042	0.653607	Th2	Chrne
Crtap	4.64059e-05	1.33391	0.03	0.013	0.672189	Th2	Crtap
Rccd1	4.67078e-05	1.33189	0.029	0.012	0.676563	Th2	Rccd1
Anxa11	4.83357e-05	0.561024	0.16	0.115	0.700143	Th2	Anxa11
Fasl1	4.84323e-05	0.401792	0.287	0.23	0.701541	Th2	Fasl
Unc45a	4.99036e-05	0.480651	0.187	0.138	0.722854	Th2	Unc45a
Nlrc3	5.12935e-05	0.65089	0.114	0.076	0.742987	Th2	Nlrc3
Itga2	5.21497e-05	1.09434	0.044	0.023	0.755389	Th2	Itga2
Hs3st3b1	5.41238e-05	1.34456	0.03	0.013	0.783984	Th2	Hs3st3b1
Btbd191	5.65136e-05	0.927678	0.059	0.033	0.8186	Th2	Btbd19
Hdc	5.72676e-05	1.1865	0.034	0.016	0.829521	Th2	Hdc
Galnt7	5.8252e-05	0.663345	0.087	0.054	0.843779	Th2	Galnt7
Gm134811	6.00337e-05	0.69136	0.114	0.076	0.869588	Th2	Gm13481
Slain1	6.25568e-05	0.659416	0.16	0.115	0.906135	Th2	Slain1
Gm50431	6.33283e-05	1.32184	0.022	0.008	0.91731	Th2	Gm50431
Csrnp2	6.58275e-05	1.62855	0.018	0.006	0.953511	Th2	Csrnp2
Vkorc1	6.62119e-05	0.533959	0.117	0.079	0.959079	Th2	Vkorc1
Pigk	6.63316e-05	0.742122	0.097	0.063	0.960813	Th2	Pigk
Myo16	6.75611e-05	1.41139	0.019	0.007	0.978622	Th2	Myo16
Tomm20	6.7703e-05	0.241671	0.539	0.471	0.980677	Th2	Tomm20
Cobll1	7.0118e-05	0.688812	0.082	0.051	1	Th2	Cobll1
Ppp2r5a	7.12566e-05	0.247474	0.381	0.314	1	Th2	Ppp2r5a
Slc4a7	7.17727e-05	0.627717	0.123	0.084	1	Th2	Slc4a7
Scmh1	7.23183e-05	1.33189	0.027	0.012	1	Th2	Scmh1
mt-Cytb	7.39039e-05	0.122561	0.982	0.976	1	Th2	mt-Cytb
mt-Atp8	7.50563e-05	0.365287	0.315	0.258	1	Th2	mt-Atp8
Arl10	7.61453e-05	1.31983	0.022	0.008	1	Th2	Arl10
Ecpas	7.72217e-05	0.612525	0.114	0.077	1	Th2	Ecpas
Gas51	7.75761e-05	0.180041	0.759	0.717	1	Th2	Gas5
Itpr2	8.07531e-05	0.41316	0.253	0.198	1	Th2	Itpr2
Tex91	8.08049e-05	1.09944	0.032	0.015	1	Th2	Tex9
Tmem41a	8.19487e-05	1.56893	0.018	0.006	1	Th2	Tmem41a
Psen2	8.34283e-05	0.510247	0.176	0.129	1	Th2	Psen2
Klf2	8.53942e-05	0.127051	0.389	0.324	1	Th2	Klf2
Tusc3	8.71831e-05	0.589823	0.109	0.073	1	Th2	Tusc3
Zfr	8.97045e-05	0.561024	0.182	0.137	1	Th2	Zfr
Trmt112	9.08604e-05	0.263859	0.371	0.305	1	Th2	Trmt112
Stim1	9.4127e-05	0.485153	0.197	0.15	1	Th2	Stim1
Bambi	9.5631e-05	1.17315	0.055	0.031	1	Th2	Bambi
Taok1	9.63444e-05	0.607292	0.107	0.071	1	Th2	Taok1
Atp5c1	9.64637e-05	0.213234	0.499	0.43	1	Th2	Atp5c1
Zbtb18	9.76091e-05	1.93439	0.011	0.003	1	Th2	Zbtb18
Ipo7	9.91666e-05	0.493358	0.123	0.084	1	Th2	Ipo7
mt-Nd5	9.96667e-05	0.156069	0.804	0.768	1	Th2	mt-Nd5
S100a11	0.000101876	0.180646	0.593	0.528	1	Th2	S100a11
Gm43305	0.000102842	0.735876	0.096	0.063	1	Th2	Gm43305
Ppp1r9b	0.000103629	0.572898	0.104	0.069	1	Th2	Ppp1r9b
Gcnt2	0.000103904	0.400614	0.218	0.167	1	Th2	Gcnt2
Prkar2a	0.000104532	0.698565	0.067	0.04	1	Th2	Prkar2a
Filip1l	0.000105465	0.755665	0.078	0.048	1	Th2	Filip1l
Il1rl1	0.000105603	0.211132	0.106	0.07	1	Th2	Il1rl1
Rbmx	0.000106335	0.506255	0.138	0.097	1	Th2	Rbmx
Ganc	0.00010665	0.850417	0.049	0.027	1	Th2	Ganc
Use1	0.000106999	0.284609	0.38	0.319	1	Th2	Use1
Rapgef2	0.000110297	0.641633	0.103	0.068	1	Th2	Rapgef2
Nme3	0.000110572	1.28387	0.026	0.011	1	Th2	Nme3
Dpp4	0.000110949	0.666919	0.082	0.052	1	Th2	Dpp4
Pde7a1	0.000113812	0.43732	0.238	0.187	1	Th2	Pde7a
Glb1	0.000118831	0.71969	0.109	0.074	1	Th2	Glb1
Ets2	0.000119346	0.449829	0.193	0.146	1	Th2	Ets2
Abhd16a	0.000122533	0.512126	0.14	0.099	1	Th2	Abhd16a
Gnb1	0.000123213	0.280347	0.385	0.321	1	Th2	Gnb1
Dusp23	0.000127304	1.399	0.017	0.006	1	Th2	Dusp23
Cpne3	0.000128473	0.712307	0.112	0.076	1	Th2	Cpne3
Pura	0.000131058	0.462515	0.187	0.14	1	Th2	Pura
Zfpm1	0.000143937	0.691101	0.06	0.035	1	Th2	Zfpm1
Atxn7	0.000147714	0.394065	0.161	0.117	1	Th2	Atxn7
Kmt2d	0.000151356	0.459287	0.153	0.11	1	Th2	Kmt2d
Pkig	0.000151593	1.32184	0.022	0.009	1	Th2	Pkig
Mrpl33	0.000159438	0.287489	0.299	0.241	1	Th2	Mrpl33
Gm13091	0.000164836	1.68441	0.014	0.004	1	Th2	Gm13091
Gm482361	0.000173474	0.558585	0.141	0.102	1	Th2	Gm48236
Gnb2	0.000174528	0.272387	0.501	0.448	1	Th2	Gnb2
Zfp871	0.000180755	0.600484	0.099	0.066	1	Th2	Zfp871
Rtf1	0.000181188	0.361904	0.233	0.182	1	Th2	Rtf1
Zc3h7b	0.00018123	0.858006	0.047	0.025	1	Th2	Zc3h7b
Usp32	0.000182079	0.646652	0.071	0.043	1	Th2	Usp32
Ywhaq	0.000184219	0.321956	0.307	0.251	1	Th2	Ywhaq
Gm40271	0.00018692	0.263118	0.389	0.328	1	Th2	Gm40271
Rcn1	0.00019755	0.738627	0.065	0.039	1	Th2	Rcn1
Tmem216	0.000208146	1.38895	0.022	0.009	1	Th2	Tmem216
Wdr89	0.000209181	0.545208	0.122	0.085	1	Th2	Wdr89
Atp5h1	0.000217604	0.187906	0.641	0.581	1	Th2	Atp5h
Rere	0.000223566	0.668582	0.072	0.045	1	Th2	Rere
Zbtb37	0.000226809	1.1856	0.024	0.01	1	Th2	Zbtb37
Crip1	0.000227552	0.166262	0.335	0.272	1	Th2	Crip1
Tlk1	0.00022757	0.341162	0.246	0.195	1	Th2	Tlk1
Il15	0.000230692	1.28002	0.018	0.007	1	Th2	Il15
Gsto1	0.0002353	0.691638	0.09	0.059	1	Th2	Gsto1
Nprl3	0.000245315	0.840058	0.048	0.027	1	Th2	Nprl3
Elovl5	0.000250867	0.396808	0.308	0.255	1	Th2	Elovl5
Ide	0.000251688	0.393557	0.184	0.139	1	Th2	Ide
Setdb2	0.000252218	0.891093	0.056	0.033	1	Th2	Setdb2
Cebpb	0.000252324	0.287832	0.46	0.406	1	Th2	Cebpb
Pde4a	0.000261421	1.19255	0.025	0.011	1	Th2	Pde4a
Ubap2l	0.000262054	0.296013	0.258	0.204	1	Th2	Ubap2l
2025-09-08	0.000262644	0.923018	0.043	0.023	1	Th2	2025-09-08
Erap1	0.000271931	0.4649	0.147	0.107	1	Th2	Erap1
Prpf4b	0.000278745	0.329256	0.302	0.249	1	Th2	Prpf4b
Emid1	0.000279541	1.23189	0.021	0.008	1	Th2	Emid1
Ttc3	0.000281577	0.441483	0.149	0.109	1	Th2	Ttc3
Nlrp3	0.000282336	1.64693	0.017	0.006	1	Th2	Nlrp3
Vps8	0.000288867	1.2351	0.026	0.012	1	Th2	Vps8
Napsa	0.000289951	1.41762	0.017	0.006	1	Th2	Napsa
Spryd71	0.000293727	0.45066	0.115	0.08	1	Th2	Spryd7
Cnih1	0.000315768	0.71478	0.114	0.08	1	Th2	Cnih1
Gtf2a1	0.000328744	0.83333	0.064	0.039	1	Th2	Gtf2a1
Adam8	0.000340647	0.804296	0.056	0.033	1	Th2	Adam8
Ppp1r3e	0.000342624	1.17455	0.025	0.011	1	Th2	Ppp1r3e
Rfx7	0.000343851	0.415124	0.128	0.091	1	Th2	Rfx7
Foxn3	0.000349047	0.345454	0.25	0.199	1	Th2	Foxn3
Pnpla7	0.000352133	0.636044	0.099	0.067	1	Th2	Pnpla7
Cbx6	0.000353793	0.668105	0.059	0.035	1	Th2	Cbx6
Vat1	0.00036318	0.916222	0.035	0.018	1	Th2	Vat1
mt-Nd2	0.000365491	0.101345	0.839	0.781	1	Th2	mt-Nd2
Mapk14	0.000386526	0.516024	0.111	0.077	1	Th2	Mapk14
Zcchc10	0.000396776	0.747396	0.075	0.048	1	Th2	Zcchc10
Ptov1	0.000408183	1.09296	0.035	0.018	1	Th2	Ptov1
Rhob	0.000413388	0.383489	0.206	0.161	1	Th2	Rhob
Ero1lb	0.000420918	0.690639	0.063	0.038	1	Th2	Ero1lb
Msh2	0.000423129	0.604507	0.089	0.059	1	Th2	Msh2
Plekhg3	0.000426932	0.897136	0.033	0.017	1	Th2	Plekhg3
Tmem184c	0.000435332	1.17607	0.029	0.014	1	Th2	Tmem184c
Trim361	0.000441161	0.740501	0.058	0.035	1	Th2	Trim36
Dubr	0.000447434	0.852723	0.043	0.024	1	Th2	Dubr
Arhgap15	0.000449352	0.402419	0.237	0.19	1	Th2	Arhgap15
Epm2aip1	0.000456467	0.904338	0.055	0.033	1	Th2	Epm2aip1
Kdm1a	0.00047234	0.35221	0.185	0.141	1	Th2	Kdm1a
Mrpl23	0.000485442	0.389524	0.195	0.151	1	Th2	Mrpl23
Kidins220	0.000511401	0.559171	0.104	0.072	1	Th2	Kidins220
3110001I22Rik	0.000514352	0.741892	0.051	0.03	1	Th2	3110001I22Rik
Pcbd2	0.000515809	0.402885	0.114	0.08	1	Th2	Pcbd2
Ints8	0.000519925	0.668347	0.07	0.044	1	Th2	Ints8
Enpp5	0.000527776	0.954821	0.047	0.027	1	Th2	Enpp5
Fndc5	0.000532106	1.53757	0.013	0.004	1	Th2	Fndc5
Kcnip1	0.000539612	1.54305	0.016	0.006	1	Th2	Kcnip1
Trps1	0.000554305	0.722881	0.068	0.043	1	Th2	Trps1
Tmem67	0.000555316	1.5913	0.015	0.005	1	Th2	Tmem67
Taf1d	0.000556803	0.355899	0.292	0.242	1	Th2	Taf1d
Rgl2	0.00055862	0.82764	0.043	0.024	1	Th2	Rgl2
Rpl24	0.000559851	0.130994	0.832	0.788	1	Th2	Rpl24
Tkt	0.00056006	0.359386	0.221	0.175	1	Th2	Tkt
Tmbim4	0.000562071	0.361904	0.231	0.185	1	Th2	Tmbim4
Kmt2a	0.000562743	0.340426	0.328	0.281	1	Th2	Kmt2a
Vcpkmt1	0.000577311	0.453244	0.178	0.137	1	Th2	Vcpkmt
Tubb5	0.000577387	0.298779	0.306	0.254	1	Th2	Tubb5
Rpl36a-ps1	0.000596785	0.675418	0.066	0.042	1	Th2	Rpl36a-ps1
Ap1s3	0.000623371	0.853688	0.039	0.021	1	Th2	Ap1s3
Polg	0.000624411	0.97577	0.05	0.03	1	Th2	Polg
Tmem186	0.000628866	1.27632	0.025	0.012	1	Th2	Tmem186
Gm32401	0.000634556	1.75841	0.016	0.006	1	Th2	Gm32401
Nop10	0.000639745	0.287639	0.382	0.331	1	Th2	Nop10
Sh3d19	0.000659907	1.32451	0.016	0.006	1	Th2	Sh3d19
Tbc1d19	0.000675994	1.64001	0.015	0.005	1	Th2	Tbc1d19
Tfap4	0.000679351	1.48801	0.013	0.004	1	Th2	Tfap4
Hist1h2be	0.000680516	1.10776	0.029	0.014	1	Th2	Hist1h2be
E130102H24Rik	0.000682378	1.2612	0.023	0.01	1	Th2	E130102H24Rik
Acod1	0.000685845	1.29634	0.041	0.023	1	Th2	Acod1
Decr1	0.00069613	1.22498	0.034	0.018	1	Th2	Decr1
Hcst1	0.000705614	0.179003	0.525	0.463	1	Th2	Hcst
Eif3h	0.000705937	0.180256	0.566	0.503	1	Th2	Eif3h
2810002D19Rik	0.000720686	1.39683	0.017	0.007	1	Th2	2810002D19Rik
Nmt2	0.00072371	0.612257	0.079	0.052	1	Th2	Nmt2
Vdac1	0.000759384	0.400568	0.148	0.11	1	Th2	Vdac1
Bicra	0.000782463	0.726134	0.059	0.037	1	Th2	Bicra
Rmi1	0.000793447	0.775769	0.056	0.034	1	Th2	Rmi1
Aldh6a1	0.000793931	1.71757	0.011	0.004	1	Th2	Aldh6a1
Kdm6a	0.000813259	0.345928	0.161	0.121	1	Th2	Kdm6a
Rpn2	0.000814266	0.317155	0.266	0.217	1	Th2	Rpn2
Tmed2	0.000839722	0.235493	0.374	0.318	1	Th2	Tmed2
B4galnt2	0.000841517	1.63378	0.017	0.007	1	Th2	B4galnt2
Raver2	0.000856542	1.46201	0.013	0.004	1	Th2	Raver2
Abhd14b	0.000861599	1.16568	0.026	0.013	1	Th2	Abhd14b
Atp6ap1	0.000869865	0.428067	0.163	0.125	1	Th2	Atp6ap1
Slc39a4	0.000872243	0.548796	0.104	0.073	1	Th2	Slc39a4
Fnip1	0.000875282	0.463577	0.103	0.072	1	Th2	Fnip1
Ppp3ca	0.000893786	0.431641	0.141	0.105	1	Th2	Ppp3ca
Stx7	0.000938936	0.605455	0.065	0.041	1	Th2	Stx7
G2e3	0.00094299	1.09944	0.03	0.015	1	Th2	G2e3
Fam173a	0.000983816	0.743141	0.051	0.031	1	Th2	Fam173a
Tmem231	0.00102193	1.62028	0.011	0.004	1	Th2	Tmem231
Creg1	0.001045	0.426555	0.12	0.087	1	Th2	Creg1
Myo1d	0.00105637	1.51448	0.014	0.005	1	Th2	Myo1d
Tia1	0.00108058	0.470518	0.086	0.058	1	Th2	Tia1
Tmed3	0.00110331	0.638892	0.079	0.053	1	Th2	Tmed3
Atp5e	0.00111601	0.16248	0.49	0.431	1	Th2	Atp5e
Ahcyl2	0.0011306	0.519776	0.095	0.066	1	Th2	Ahcyl2
Actr8	0.00113227	0.791322	0.056	0.035	1	Th2	Actr8
Dnajc3	0.00113405	0.216801	0.316	0.264	1	Th2	Dnajc3
Tbc1d41	0.00113601	0.379789	0.104	0.073	1	Th2	Tbc1d4
2310009B15Rik	0.00113993	0.775703	0.05	0.03	1	Th2	2310009B15Rik
Pigc	0.00114219	0.81113	0.054	0.033	1	Th2	Pigc
Ctns	0.00114647	1.16656	0.023	0.011	1	Th2	Ctns
Arl8a	0.00118471	0.473133	0.111	0.079	1	Th2	Arl8a
Plk31	0.00119034	0.365256	0.283	0.235	1	Th2	Plk3
Trav14n-3	0.00119207	1.61402	0.01	0.003	1	Th2	Trav14n-3
4930523C07Rik	0.00119385	0.36477	0.368	0.324	1	Th2	4930523C07Rik
Nme6	0.00121259	1.46201	0.015	0.006	1	Th2	Nme6
Gypc	0.00126144	0.496582	0.09	0.062	1	Th2	Gypc
Plscr4	0.00130536	1.79132	0.013	0.005	1	Th2	Plscr4
Cisd1	0.00130899	0.578394	0.092	0.064	1	Th2	Cisd1
Auh	0.0013136	0.509429	0.099	0.07	1	Th2	Auh
Slc35e2	0.00132995	0.684407	0.076	0.051	1	Th2	Slc35e2
Agpat2	0.00133006	0.742227	0.039	0.022	1	Th2	Agpat2
2810459M11Rik	0.00133243	0.877052	0.029	0.015	1	Th2	2810459M11Rik
Glcci1	0.00134396	0.71478	0.057	0.036	1	Th2	Glcci1
Acvr2a	0.0013516	0.633359	0.106	0.076	1	Th2	Acvr2a
Trim14	0.00136115	0.491961	0.111	0.08	1	Th2	Trim14
D2hgdh	0.00138174	0.974749	0.026	0.013	1	Th2	D2hgdh
Selenof	0.00138175	0.247241	0.397	0.344	1	Th2	Selenof
Nadk2	0.00139525	0.809938	0.039	0.022	1	Th2	Nadk2
Dad1	0.00140234	0.217036	0.59	0.541	1	Th2	Dad1
Fnta	0.00140881	0.666121	0.054	0.033	1	Th2	Fnta
Plxna1	0.0014229	0.916222	0.033	0.018	1	Th2	Plxna1
Rbm33	0.00142938	0.392518	0.161	0.124	1	Th2	Rbm33
Fdx1	0.00144597	0.580715	0.098	0.07	1	Th2	Fdx1
Bora	0.00146098	1.10909	0.025	0.012	1	Th2	Bora
Bcl2l15	0.00146661	1.26294	0.015	0.006	1	Th2	Bcl2l15
Skp1a	0.00146831	0.346319	0.306	0.263	1	Th2	Skp1a
Chsy11	0.0014878	0.853688	0.036	0.02	1	Th2	Chsy1
Dmxl1	0.00151699	0.522943	0.109	0.079	1	Th2	Dmxl1
Tm9sf3	0.00153248	0.22998	0.3	0.25	1	Th2	Tm9sf3
Slc9a1	0.00153871	0.690143	0.064	0.041	1	Th2	Slc9a1
Edf1	0.00153883	0.186374	0.332	0.278	1	Th2	Edf1
Rad51d	0.00155741	0.905965	0.036	0.02	1	Th2	Rad51d
Gm14305	0.00155957	1.06382	0.022	0.01	1	Th2	Gm14305
Dleu2	0.00156796	0.653043	0.084	0.058	1	Th2	Dleu2
Zfand5	0.00157033	0.259385	0.332	0.282	1	Th2	Zfand5
Foxd2os	0.0015865	0.955479	0.029	0.015	1	Th2	Foxd2os
Unc93b1	0.00159668	0.556302	0.075	0.051	1	Th2	Unc93b1
Letmd1	0.0016245	0.61874	0.056	0.035	1	Th2	Letmd1
0610010F05Rik	0.00162818	1.27502	0.017	0.007	1	Th2	0610010F05Rik
Osgin11	0.00163549	0.408583	0.115	0.084	1	Th2	Osgin1
Pcbp2	0.00163712	0.155099	0.725	0.693	1	Th2	Pcbp2
Zfp263	0.0016832	0.630968	0.057	0.036	1	Th2	Zfp263
Vps13a	0.00168689	0.427604	0.138	0.104	1	Th2	Vps13a
Eif4b	0.00169099	0.282942	0.261	0.216	1	Th2	Eif4b
Itm2a	0.00175879	0.647983	0.047	0.028	1	Th2	Itm2a
Phtf2	0.00177821	0.73637	0.054	0.034	1	Th2	Phtf2
Ddb1	0.00178661	0.430213	0.135	0.101	1	Th2	Ddb1
Eif3f	0.00178987	0.176678	0.625	0.585	1	Th2	Eif3f
Sik2	0.00179442	0.641633	0.055	0.034	1	Th2	Sik2
Ktn1	0.00181268	0.400568	0.139	0.105	1	Th2	Ktn1
Gbp7	0.0018289	0.273531	0.198	0.157	1	Th2	Gbp7
Slc12a2	0.00184072	1.19342	0.03	0.016	1	Th2	Slc12a2
Ddx59	0.00189376	1.23962	0.018	0.008	1	Th2	Ddx59
Ctdsp1	0.00189442	0.438892	0.13	0.097	1	Th2	Ctdsp1
Arid3b	0.00189618	0.888236	0.038	0.021	1	Th2	Arid3b
Gm11714	0.0019077	1.25442	0.017	0.007	1	Th2	Gm11714
Arsb	0.00192294	0.707975	0.055	0.035	1	Th2	Arsb
Cpox	0.00192421	0.625513	0.066	0.044	1	Th2	Cpox
Npc1	0.00194176	0.854332	0.03	0.016	1	Th2	Npc1
Ccrl2	0.00195282	0.426445	0.198	0.158	1	Th2	Ccrl2
Zmpste24	0.001965	0.543719	0.076	0.052	1	Th2	Zmpste24
Nfix	0.00198458	1.66056	0.013	0.005	1	Th2	Nfix
Jazf1	0.00198574	1.05214	0.022	0.01	1	Th2	Jazf1
Igkv4-59	0.00209112	1.4043	0.019	0.009	1	Th2	Igkv4-59
Mzt1	0.00209376	0.502409	0.117	0.087	1	Th2	Mzt1
Gm49980	0.00209586	0.464141	0.089	0.063	1	Th2	Gm49980
Ndrg3	0.00211112	0.519299	0.103	0.074	1	Th2	Ndrg3
Adgre51	0.00212245	0.22651	0.303	0.253	1	Th2	Adgre5
Abhd2	0.00224974	0.509207	0.096	0.068	1	Th2	Abhd2
Prpf40b	0.0022563	1.44737	0.014	0.005	1	Th2	Prpf40b
Rab3d	0.00228927	1.24383	0.021	0.01	1	Th2	Rab3d
Eif3e	0.00230115	0.190262	0.506	0.459	1	Th2	Eif3e
Cradd	0.00230854	0.837281	0.046	0.028	1	Th2	Cradd
Tmco1	0.00232241	0.395604	0.157	0.123	1	Th2	Tmco1
Metrnl	0.00233321	0.530601	0.084	0.059	1	Th2	Metrnl
Camk2b	0.00239203	0.561425	0.064	0.042	1	Th2	Camk2b
Tusc1	0.00241544	1.57749	0.013	0.005	1	Th2	Tusc1
Slc25a12	0.00243912	0.44356	0.094	0.066	1	Th2	Slc25a12
Nceh1	0.00244905	0.691496	0.051	0.032	1	Th2	Nceh1
Ywhaz	0.00244915	0.159527	0.686	0.652	1	Th2	Ywhaz
Zfp36	0.00245109	0.327527	0.455	0.417	1	Th2	Zfp36
Nsd1	0.00246048	0.275368	0.231	0.189	1	Th2	Nsd1
Ssh3	0.00251573	1.58007	0.01	0.004	1	Th2	Ssh3
Tmem156	0.00256195	0.885319	0.044	0.027	1	Th2	Tmem156
Pou2f2	0.00261199	0.558298	0.074	0.051	1	Th2	Pou2f2
Plgrkt	0.00270771	0.290234	0.243	0.2	1	Th2	Plgrkt
Hs6st1	0.00273572	0.722475	0.049	0.031	1	Th2	Hs6st1
Dpy19l4	0.00273768	1.08034	0.025	0.013	1	Th2	Dpy19l4
Nucb1	0.00274402	0.343228	0.197	0.159	1	Th2	Nucb1
Tmed7	0.0027453	0.293568	0.19	0.151	1	Th2	Tmed7
Tecpr2	0.00279738	0.480232	0.083	0.058	1	Th2	Tecpr2
Carm1	0.00285605	0.732662	0.041	0.024	1	Th2	Carm1
Sppl3	0.00287905	0.472748	0.107	0.079	1	Th2	Sppl3
Dtymk	0.0029009	0.600749	0.066	0.044	1	Th2	Dtymk
Evi5	0.00290141	1.1095	0.023	0.011	1	Th2	Evi5
Hint1	0.00291062	0.194787	0.438	0.386	1	Th2	Hint1
Zfp973	0.00297253	1.00323	0.029	0.015	1	Th2	Zfp973
Ercc5	0.00308288	0.599303	0.071	0.048	1	Th2	Ercc5
Rexo5	0.00309151	0.763262	0.047	0.029	1	Th2	Rexo5
Kctd2	0.00311844	0.563144	0.071	0.048	1	Th2	Kctd2
Eid1	0.00311928	0.390907	0.123	0.092	1	Th2	Eid1
Lrch3	0.00317881	0.496929	0.113	0.084	1	Th2	Lrch3
Ing1	0.00320456	0.328192	0.154	0.12	1	Th2	Ing1
Arhgap25	0.00320809	0.459716	0.111	0.082	1	Th2	Arhgap25
Nop561	0.00320961	0.255258	0.302	0.257	1	Th2	Nop56
Usp33	0.00325985	0.73021	0.034	0.02	1	Th2	Usp33
[truncated: 5,972 more rows]
