# Supplementary material for: RORγt+ APCs require a distinct cis-regulatory element to instruct tolerance to dietary antigens
Source: Research Square preprint supplement (doi:10.21203/rs.3.rs-4865841/v1), 2025-08-01
Supplement: Supplementary file 6 [file ddaebb02d1cddce154618ecd.xlsx]

## Sheet: Table 2. 3-week-old mLN APC DEG
	p_val	avg_log2FC	pct.1	pct.2	p_val_adj	cluster	gene
Rora	0	3.72785	0.803	0.127	0	MHC-II+ ILC3	Rora
Cxcr6	0	4.34597	0.793	0.117	0	MHC-II+ ILC3	Cxcr6
Klrb1b	0	3.97993	0.734	0.07	0	MHC-II+ ILC3	Klrb1b
Cebpb	0	3.64681	0.876	0.222	0	MHC-II+ ILC3	Cebpb
Il2rb	0	3.4614	0.932	0.293	0	MHC-II+ ILC3	Il2rb
Ier5l	0	3.43626	0.801	0.168	0	MHC-II+ ILC3	Ier5l
Cd53	0	2.71827	0.856	0.24	0	MHC-II+ ILC3	Cd53
Ckb	0	2.95357	0.863	0.251	0	MHC-II+ ILC3	Ckb
Selenop	0	3.52864	0.685	0.075	0	MHC-II+ ILC3	Selenop
Neurl3	0	3.05374	0.9	0.293	0	MHC-II+ ILC3	Neurl3
D16Ertd472e	0	3.23478	0.772	0.183	0	MHC-II+ ILC3	D16Ertd472e
Ptprcap	0	3.02554	0.749	0.16	0	MHC-II+ ILC3	Ptprcap
Ifngr1	0	2.83602	0.871	0.29	0	MHC-II+ ILC3	Ifngr1
Nrgn	0	2.47138	0.717	0.139	0	MHC-II+ ILC3	Nrgn
Il18r1	0	3.16368	0.66	0.096	0	MHC-II+ ILC3	Il18r1
Emb	0	3.777	0.993	0.43	0	MHC-II+ ILC3	Emb
Ern1	0	3.1487	0.665	0.108	0	MHC-II+ ILC3	Ern1
Ccdc184	0	4.32902	0.625	0.069	0	MHC-II+ ILC3	Ccdc184
Gem	0	3.01396	0.842	0.29	0	MHC-II+ ILC3	Gem
Dgat1	0	3.13784	0.909	0.363	0	MHC-II+ ILC3	Dgat1
S100a10	0	2.85759	0.899	0.354	0	MHC-II+ ILC3	S100a10
Vegfa	0	3.38192	0.695	0.152	0	MHC-II+ ILC3	Vegfa
Vps37b	0	3.21226	0.941	0.401	0	MHC-II+ ILC3	Vps37b
Il7r	0	2.78759	0.944	0.406	0	MHC-II+ ILC3	Il7r
Itk	0	3.9082	0.594	0.057	0	MHC-II+ ILC3	Itk
Lmna	0	3.18617	0.768	0.232	0	MHC-II+ ILC3	Lmna
Ets1	0	3.69428	0.6	0.067	0	MHC-II+ ILC3	Ets1
Cx3cl1	0	3.09738	0.703	0.171	0	MHC-II+ ILC3	Cx3cl1
Pxdc1	0	3.04791	0.935	0.407	0	MHC-II+ ILC3	Pxdc1
Tgm2	0	3.95462	0.64	0.116	0	MHC-II+ ILC3	Tgm2
Cwc25	0	3.26603	0.644	0.124	0	MHC-II+ ILC3	Cwc25
Fosl2	0	2.58836	0.689	0.169	0	MHC-II+ ILC3	Fosl2
Irs2	0	3.5872	0.603	0.087	0	MHC-II+ ILC3	Irs2
Cd82	0	2.2119	0.957	0.446	0	MHC-II+ ILC3	Cd82
Shisa5	0	2.92129	0.991	0.481	0	MHC-II+ ILC3	Shisa5
Dll1	0	4.54162	0.55	0.045	0	MHC-II+ ILC3	Dll1
Ltb	0	2.03084	0.869	0.365	0	MHC-II+ ILC3	Ltb
Sdc4	0	2.65042	0.655	0.152	0	MHC-II+ ILC3	Sdc4
Nabp1	0	2.40406	0.872	0.377	0	MHC-II+ ILC3	Nabp1
Eprs	0	3.08703	0.832	0.338	0	MHC-II+ ILC3	Eprs
Trbc2	0	4.47516	0.544	0.056	0	MHC-II+ ILC3	Trbc2
Ttn	0	2.82063	0.605	0.118	0	MHC-II+ ILC3	Ttn
Fam110a	0	2.3884	0.754	0.267	0	MHC-II+ ILC3	Fam110a
Cd4	0	4.09869	0.545	0.064	0	MHC-II+ ILC3	Cd4
Isy1	0	2.72881	0.642	0.161	0	MHC-II+ ILC3	Isy1
Tuba4a	0	2.69096	0.694	0.214	0	MHC-II+ ILC3	Tuba4a
Rgs2	0	2.85599	0.883	0.406	0	MHC-II+ ILC3	Rgs2
Maff	0	2.60037	0.634	0.16	0	MHC-II+ ILC3	Maff
Macf1	0	1.96092	0.723	0.25	0	MHC-II+ ILC3	Macf1
Tnfsf11	0	3.49947	0.572	0.1	0	MHC-II+ ILC3	Tnfsf11
Bcl2	0	3.73416	0.521	0.052	0	MHC-II+ ILC3	Bcl2
Rasl11a	0	3.64073	0.563	0.096	0	MHC-II+ ILC3	Rasl11a
Saraf	0	2.09128	0.712	0.251	0	MHC-II+ ILC3	Saraf
Cd37	0	1.55061	0.747	0.295	0	MHC-II+ ILC3	Cd37
Sik1	0	2.22555	0.619	0.168	0	MHC-II+ ILC3	Sik1
Ier2	0	1.99956	0.713	0.265	0	MHC-II+ ILC3	Ier2
Mndal	0	1.79859	0.665	0.218	0	MHC-II+ ILC3	Mndal
Ppp1cc	0	2.09768	0.732	0.286	0	MHC-II+ ILC3	Ppp1cc
Orai1	0	2.26525	0.711	0.267	0	MHC-II+ ILC3	Orai1
Gpr183	0	1.84011	0.865	0.422	0	MHC-II+ ILC3	Gpr183
Lmo4	0	2.69224	0.64	0.201	0	MHC-II+ ILC3	Lmo4
Uhrf2	0	2.37691	0.632	0.193	0	MHC-II+ ILC3	Uhrf2
Prr7	0	2.40808	0.584	0.145	0	MHC-II+ ILC3	Prr7
Sptssa	0	2.87167	0.572	0.133	0	MHC-II+ ILC3	Sptssa
Ccr6	0	2.67352	0.586	0.147	0	MHC-II+ ILC3	Ccr6
Spty2d1	0	2.50227	0.627	0.19	0	MHC-II+ ILC3	Spty2d1
Rac2	0	1.69018	0.897	0.461	0	MHC-II+ ILC3	Rac2
2025-09-01	0	2.46558	0.567	0.131	0	MHC-II+ ILC3	2025-09-01
Socs3	0	2.56507	0.555	0.121	0	MHC-II+ ILC3	Socs3
Bzw2	0	2.67077	0.56	0.131	0	MHC-II+ ILC3	Bzw2
Impa2	0	3.58765	0.496	0.067	0	MHC-II+ ILC3	Impa2
Il2ra	0	2.56721	0.534	0.118	0	MHC-II+ ILC3	Il2ra
Ms4a4c	0	2.61207	0.514	0.098	0	MHC-II+ ILC3	Ms4a4c
Cxxc5	0	3.72665	0.464	0.049	0	MHC-II+ ILC3	Cxxc5
Ell2	0	2.0814	0.631	0.218	0	MHC-II+ ILC3	Ell2
Odc1	0	3.81176	0.989	0.577	0	MHC-II+ ILC3	Odc1
Btg2	0	1.75762	0.879	0.469	0	MHC-II+ ILC3	Btg2
Clcn3	0	2.69061	0.514	0.108	0	MHC-II+ ILC3	Clcn3
Phlda1	0	2.88951	0.487	0.081	0	MHC-II+ ILC3	Phlda1
Ivns1abp	0	1.76153	0.746	0.341	0	MHC-II+ ILC3	Ivns1abp
Nfkbiz	0	1.68669	0.675	0.271	0	MHC-II+ ILC3	Nfkbiz
Nr4a1	0	1.42775	0.801	0.399	0	MHC-II+ ILC3	Nr4a1
Prdx6	0	1.57106	0.721	0.32	0	MHC-II+ ILC3	Prdx6
Evl	0	2.84189	0.487	0.087	0	MHC-II+ ILC3	Evl
Mat2a	0	2.02097	0.658	0.26	0	MHC-II+ ILC3	Mat2a
Cryaa	0	2.50118	0.536	0.138	0	MHC-II+ ILC3	Cryaa
Zc3hav1	0	1.86739	0.669	0.276	0	MHC-II+ ILC3	Zc3hav1
Hcst	0	3.75307	0.439	0.046	0	MHC-II+ ILC3	Hcst
Klf4	0	2.46697	0.537	0.145	0	MHC-II+ ILC3	Klf4
Trf	0	2.7772	0.51	0.118	0	MHC-II+ ILC3	Trf
Ndfip1	0	1.69526	0.778	0.387	0	MHC-II+ ILC3	Ndfip1
Cd164	0	2.39067	0.574	0.183	0	MHC-II+ ILC3	Cd164
Gna13	0	1.98733	0.608	0.218	0	MHC-II+ ILC3	Gna13
Tm9sf2	0	1.85584	0.627	0.241	0	MHC-II+ ILC3	Tm9sf2
Jak1	0	1.56791	0.804	0.42	0	MHC-II+ ILC3	Jak1
Fos	0	1.66429	0.842	0.459	0	MHC-II+ ILC3	Fos
Hk2	0	3.08355	0.469	0.087	0	MHC-II+ ILC3	Hk2
Ncor1	0	1.53823	0.732	0.35	0	MHC-II+ ILC3	Ncor1
Stk17b	0	1.58573	0.708	0.327	0	MHC-II+ ILC3	Stk17b
Snhg5	0	2.95535	0.475	0.095	0	MHC-II+ ILC3	Snhg5
Kdm6b	0	1.14717	0.755	0.379	0	MHC-II+ ILC3	Kdm6b
Asb2	0	2.29018	0.498	0.122	0	MHC-II+ ILC3	Asb2
Spcs2	0	1.85541	0.6	0.225	0	MHC-II+ ILC3	Spcs2
Sppl2a	0	1.69547	0.675	0.301	0	MHC-II+ ILC3	Sppl2a
Serp1	0	1.68861	0.745	0.371	0	MHC-II+ ILC3	Serp1
Ldha	0	1.3607	0.724	0.35	0	MHC-II+ ILC3	Ldha
Eno1	0	1.74126	0.607	0.235	0	MHC-II+ ILC3	Eno1
Cdk11b	0	2.54062	0.742	0.373	0	MHC-II+ ILC3	Cdk11b
Nfkb1	0	1.58944	0.813	0.444	0	MHC-II+ ILC3	Nfkb1
Tmem50a	0	1.7186	0.62	0.252	0	MHC-II+ ILC3	Tmem50a
Gimap3	0	4.43469	0.397	0.029	0	MHC-II+ ILC3	Gimap3
Socs1	0	1.82332	0.629	0.262	0	MHC-II+ ILC3	Socs1
Krt83	0	4.09865	0.403	0.037	0	MHC-II+ ILC3	Krt83
Smox	0	3.22808	0.427	0.061	0	MHC-II+ ILC3	Smox
Prkar1a	0	1.63396	0.816	0.45	0	MHC-II+ ILC3	Prkar1a
Zfp36l2	0	2.16865	0.518	0.153	0	MHC-II+ ILC3	Zfp36l2
Car2	0	1.93089	0.542	0.178	0	MHC-II+ ILC3	Car2
F2r	0	4.72304	0.38	0.019	0	MHC-II+ ILC3	F2r
Fxyd5	0	1.33939	0.662	0.302	0	MHC-II+ ILC3	Fxyd5
Ptpn22	0	2.9469	0.43	0.071	0	MHC-II+ ILC3	Ptpn22
Cd7	0	1.27813	0.669	0.311	0	MHC-II+ ILC3	Cd7
Crem	0	2.8825	0.947	0.59	0	MHC-II+ ILC3	Crem
Fosb	0	1.45228	0.627	0.271	0	MHC-II+ ILC3	Fosb
Snx18	0	2.58052	0.444	0.088	0	MHC-II+ ILC3	Snx18
Trmt61b	0	3.38458	0.446	0.091	0	MHC-II+ ILC3	Trmt61b
Rabac1	0	1.5384	0.772	0.418	0	MHC-II+ ILC3	Rabac1
Gpr65	0	2.47473	0.461	0.107	0	MHC-II+ ILC3	Gpr65
Lpxn	0	2.92304	0.427	0.073	0	MHC-II+ ILC3	Lpxn
Arid5a	0	2.56868	0.456	0.103	0	MHC-II+ ILC3	Arid5a
Cbarp	0	2.38427	0.475	0.122	0	MHC-II+ ILC3	Cbarp
Tcf7	0	1.4446	0.832	0.479	0	MHC-II+ ILC3	Tcf7
Furin	0	2.61117	0.441	0.089	0	MHC-II+ ILC3	Furin
Cd81	0	1.06283	0.66	0.31	0	MHC-II+ ILC3	Cd81
Dnajc3	0	1.79986	0.553	0.203	0	MHC-II+ ILC3	Dnajc3
Gng2	0	2.43745	0.451	0.101	0	MHC-II+ ILC3	Gng2
Ablim1	0	3.81149	0.384	0.036	0	MHC-II+ ILC3	Ablim1
Ifi203	0	2.00421	0.476	0.128	0	MHC-II+ ILC3	Ifi203
Klf13	0	1.99776	0.499	0.152	0	MHC-II+ ILC3	Klf13
Kit	0	1.63095	0.551	0.206	0	MHC-II+ ILC3	Kit
Nr4a3	0	1.21752	0.761	0.416	0	MHC-II+ ILC3	Nr4a3
Bpnt1	0	2.67477	0.432	0.087	0	MHC-II+ ILC3	Bpnt1
Eng	0	3.36754	0.402	0.058	0	MHC-II+ ILC3	Eng
Tgfb1	0	1.99389	0.523	0.18	0	MHC-II+ ILC3	Tgfb1
Itgb7	0	1.87432	0.493	0.15	0	MHC-II+ ILC3	Itgb7
Xlr4a	0	2.95821	0.401	0.059	0	MHC-II+ ILC3	Xlr4a
Prrc2c	0	1.508	0.879	0.537	0	MHC-II+ ILC3	Prrc2c
Cited2	0	2.26554	0.534	0.193	0	MHC-II+ ILC3	Cited2
Ddx3x	0	1.42575	0.697	0.356	0	MHC-II+ ILC3	Ddx3x
Trp53inp1	0	3.09903	0.4	0.062	0	MHC-II+ ILC3	Trp53inp1
P2ry10	0	1.38956	0.702	0.364	0	MHC-II+ ILC3	P2ry10
Podnl1	0	4.46972	0.357	0.02	0	MHC-II+ ILC3	Podnl1
Dot1l	0	1.6522	0.516	0.181	0	MHC-II+ ILC3	Dot1l
Ppp1r11	0	1.7104	0.638	0.303	0	MHC-II+ ILC3	Ppp1r11
Nfkbie	0	1.40732	0.812	0.478	0	MHC-II+ ILC3	Nfkbie
Tnfrsf25	0	3.39221	0.377	0.044	0	MHC-II+ ILC3	Tnfrsf25
Anp32a	0	1.42039	0.702	0.371	0	MHC-II+ ILC3	Anp32a
Anxa6	0	1.43576	0.53	0.2	0	MHC-II+ ILC3	Anxa6
Cntn1	0	2.86739	0.386	0.056	0	MHC-II+ ILC3	Cntn1
Ypel3	0	2.07801	0.47	0.14	0	MHC-II+ ILC3	Ypel3
Tex2	0	3.55818	0.365	0.036	0	MHC-II+ ILC3	Tex2
Cish	0	3.1903	0.389	0.061	0	MHC-II+ ILC3	Cish
Espn	0	4.47662	0.348	0.02	0	MHC-II+ ILC3	Espn
Clnk	0	3.82802	0.358	0.03	0	MHC-II+ ILC3	Clnk
Tspan13	0	1.18557	0.807	0.48	0	MHC-II+ ILC3	Tspan13
Smarca5	0	1.57117	0.65	0.323	0	MHC-II+ ILC3	Smarca5
Celf2	0	1.08787	0.67	0.344	0	MHC-II+ ILC3	Celf2
Dnaja1	0	1.89349	0.939	0.613	0	MHC-II+ ILC3	Dnaja1
Gmfg	0	1.51847	0.555	0.23	0	MHC-II+ ILC3	Gmfg
Skp1a	0	1.28206	0.688	0.363	0	MHC-II+ ILC3	Skp1a
Dad1	0	2.16651	0.917	0.593	0	MHC-II+ ILC3	Dad1
Tpst2	0	2.51668	0.419	0.095	0	MHC-II+ ILC3	Tpst2
Il2rg	0	1.54796	0.925	0.602	0	MHC-II+ ILC3	Il2rg
Irak2	0	2.2176	0.438	0.115	0	MHC-II+ ILC3	Irak2
Ninj1	0	2.22875	0.457	0.134	0	MHC-II+ ILC3	Ninj1
Sytl3	0	3.52861	0.358	0.036	0	MHC-II+ ILC3	Sytl3
Plcb4	0	2.96568	0.38	0.059	0	MHC-II+ ILC3	Plcb4
Ifrd1	0	1.4046	0.864	0.543	0	MHC-II+ ILC3	Ifrd1
Rgcc	0	3.23747	0.387	0.068	0	MHC-II+ ILC3	Rgcc
Ramp1	0	2.04198	0.45	0.133	0	MHC-II+ ILC3	Ramp1
Traf4	0	2.70781	0.395	0.078	0	MHC-II+ ILC3	Traf4
D8Ertd738e	0	1.4726	0.706	0.389	0	MHC-II+ ILC3	D8Ertd738e
Ly6e	0	2.64296	1	0.687	0	MHC-II+ ILC3	Ly6e
Hsp90b1	0	1.38847	0.842	0.53	0	MHC-II+ ILC3	Hsp90b1
Ppp1r16b	0	2.94769	0.365	0.056	0	MHC-II+ ILC3	Ppp1r16b
Rnf125	0	4.13006	0.331	0.022	0	MHC-II+ ILC3	Rnf125
Cnnm2	0	3.20574	0.359	0.05	0	MHC-II+ ILC3	Cnnm2
Tnfaip3	0	1.29003	0.83	0.522	0	MHC-II+ ILC3	Tnfaip3
Serpinb1a	0	2.11477	0.395	0.089	0	MHC-II+ ILC3	Serpinb1a
Tob2	0	1.80613	0.549	0.246	0	MHC-II+ ILC3	Tob2
Srsf5	0	1.23344	0.722	0.42	0	MHC-II+ ILC3	Srsf5
Bhlhe40	0	1.40793	0.939	0.638	0	MHC-II+ ILC3	Bhlhe40
Hilpda	0	2.48799	0.426	0.126	0	MHC-II+ ILC3	Hilpda
Lat	0	4.25142	0.32	0.02	0	MHC-II+ ILC3	Lat
Tiparp	0	2.70778	0.378	0.08	0	MHC-II+ ILC3	Tiparp
Ube2s	0	1.15508	0.703	0.405	0	MHC-II+ ILC3	Ube2s
Rhoq	0	2.36526	0.391	0.095	0	MHC-II+ ILC3	Rhoq
Emd	0	1.8045	0.775	0.484	0	MHC-II+ ILC3	Emd
Xlr4b	0	2.86333	0.341	0.053	0	MHC-II+ ILC3	Xlr4b
Fam184b	0	4.7579	0.302	0.015	0	MHC-II+ ILC3	Fam184b
Fcer1g	0	1.59295	0.962	0.677	0	MHC-II+ ILC3	Fcer1g
Calm2	0	1.18521	0.734	0.45	0	MHC-II+ ILC3	Calm2
Hmgb1	0	1.07792	0.869	0.589	0	MHC-II+ ILC3	Hmgb1
Pim1	0	1.00026	0.825	0.546	0	MHC-II+ ILC3	Pim1
Rnasel	0	3.50826	0.316	0.039	0	MHC-II+ ILC3	Rnasel
Ptpn7	0	4.1786	0.297	0.02	0	MHC-II+ ILC3	Ptpn7
Gimap8	0	3.51015	0.31	0.034	0	MHC-II+ ILC3	Gimap8
Atf4	0	1.13585	0.729	0.455	0	MHC-II+ ILC3	Atf4
Sfpq	0	1.15511	0.842	0.569	0	MHC-II+ ILC3	Sfpq
Jund	0	1.89084	0.969	0.697	0	MHC-II+ ILC3	Jund
Psd2	0	3.8164	0.295	0.025	0	MHC-II+ ILC3	Psd2
Cd160	0	4.14904	0.287	0.019	0	MHC-II+ ILC3	Cd160
Zap70	0	4.10983	0.283	0.019	0	MHC-II+ ILC3	Zap70
Cnbp	0	1.64869	0.966	0.703	0	MHC-II+ ILC3	Cnbp
Arhgdib	0	1.07099	0.885	0.629	0	MHC-II+ ILC3	Arhgdib
Hspa5	0	1.18109	0.949	0.702	0	MHC-II+ ILC3	Hspa5
Il22	0	4.30742	0.741	0.498	0	MHC-II+ ILC3	Il22
Prdx2	0	1.27539	0.716	0.478	0	MHC-II+ ILC3	Prdx2
Cdkn1a	0	1.67709	0.875	0.641	0	MHC-II+ ILC3	Cdkn1a
Ywhaz	0	1.01982	0.844	0.613	0	MHC-II+ ILC3	Ywhaz
Tpm4	0	1.2627	0.867	0.639	0	MHC-II+ ILC3	Tpm4
Eif5a	0	0.863382	0.848	0.621	0	MHC-II+ ILC3	Eif5a
Gpr132	0	0.836823	0.856	0.634	0	MHC-II+ ILC3	Gpr132
Serinc3	0	1.06678	0.877	0.657	0	MHC-II+ ILC3	Serinc3
Ncl	0	0.90431	0.912	0.693	0	MHC-II+ ILC3	Ncl
Srsf3	0	1.03545	0.86	0.648	0	MHC-II+ ILC3	Srsf3
Atp5d	0	1.17027	0.901	0.713	0	MHC-II+ ILC3	Atp5d
Atp5md	0	1.3565	0.871	0.691	0	MHC-II+ ILC3	Atp5md
Junb	0	1.80194	0.992	0.833	0	MHC-II+ ILC3	Junb
mt-Nd2	0	0.65005	0.965	0.836	0	MHC-II+ ILC3	mt-Nd2
Slc25a3	0	0.972735	0.957	0.859	0	MHC-II+ ILC3	Slc25a3
Oaz1	0	1.07681	0.994	0.908	0	MHC-II+ ILC3	Oaz1
Rpl12	0	0.794359	0.99	0.91	0	MHC-II+ ILC3	Rpl12
Itm2b	0	0.789301	0.989	0.909	0	MHC-II+ ILC3	Itm2b
Ptma	0	0.623329	0.996	0.923	0	MHC-II+ ILC3	Ptma
Hnrnpa2b1	0	0.610477	0.982	0.927	0	MHC-II+ ILC3	Hnrnpa2b1
Rpl38	0	0.83404	0.996	0.955	0	MHC-II+ ILC3	Rpl38
Rps8	0	0.575744	0.998	0.959	0	MHC-II+ ILC3	Rps8
Tmsb10	0	1.69701	1	0.969	0	MHC-II+ ILC3	Tmsb10
Ddx5	0	0.734066	0.999	0.97	0	MHC-II+ ILC3	Ddx5
Hsp90ab1	0	0.619342	0.997	0.97	0	MHC-II+ ILC3	Hsp90ab1
Rps21	0	0.6462	0.997	0.975	0	MHC-II+ ILC3	Rps21
H3f3b	0	0.625068	0.994	0.976	0	MHC-II+ ILC3	H3f3b
Rps18	0	0.490018	0.999	0.981	0	MHC-II+ ILC3	Rps18
Rpl5	0	0.560989	0.999	0.986	0	MHC-II+ ILC3	Rpl5
Rps3a1	0	0.536594	1	0.991	0	MHC-II+ ILC3	Rps3a1
Rpl21	0	0.851721	1	0.992	0	MHC-II+ ILC3	Rpl21
Eif1	0	0.617121	1	0.995	0	MHC-II+ ILC3	Eif1
Rpl23	0	0.561072	1	0.996	0	MHC-II+ ILC3	Rpl23
Fth1	0	1.70216	1	0.997	0	MHC-II+ ILC3	Fth1
Rpl10	0	0.721224	1	0.998	0	MHC-II+ ILC3	Rpl10
Rps16	0	0.417841	1	0.998	0	MHC-II+ ILC3	Rps16
Rps24	0	0.421309	1	0.998	0	MHC-II+ ILC3	Rps24
Rplp1	0	0.563627	1	0.998	0	MHC-II+ ILC3	Rplp1
Tpt1	0	0.668901	1	0.999	0	MHC-II+ ILC3	Tpt1
Icam2	2.36193e-307	3.21479	0.318	0.042	4.24675e-303	MHC-II+ ILC3	Icam2
Icos	1.23658e-306	2.96634	0.341	0.06	2.22337e-302	MHC-II+ ILC3	Icos
Slc6a13	1.55639e-306	2.86873	0.336	0.054	2.79839e-302	MHC-II+ ILC3	Slc6a13
Ptbp1	1.44242e-305	1.46124	0.566	0.259	2.59346e-301	MHC-II+ ILC3	Ptbp1
Krtcap2	6.66628e-305	1.35733	0.616	0.315	1.1986e-300	MHC-II+ ILC3	Krtcap2
Chmp1b	1.93969e-304	2.14133	0.435	0.139	3.48757e-300	MHC-II+ ILC3	Chmp1b
Fyb	4.33106e-304	1.06233	0.673	0.342	7.78724e-300	MHC-II+ ILC3	Fyb
Map1lc3b	6.24229e-301	1.10195	0.753	0.519	1.12236e-296	MHC-II+ ILC3	Map1lc3b
Hk3	8.50597e-301	4.1485	0.28	0.02	1.52937e-296	MHC-II+ ILC3	Hk3
Ubl3	7.76809e-299	1.42695	0.574	0.268	1.3967e-294	MHC-II+ ILC3	Ubl3
Chd4	1.31778e-297	1.27139	0.637	0.342	2.36937e-293	MHC-II+ ILC3	Chd4
Tubb4b	6.13616e-297	1.6089	0.514	0.213	1.10328e-292	MHC-II+ ILC3	Tubb4b
Stat4	4.95734e-295	1.42524	0.509	0.191	8.9133e-291	MHC-II+ ILC3	Stat4
Zc3h15	1.06318e-294	1.55546	0.554	0.26	1.9116e-290	MHC-II+ ILC3	Zc3h15
Cerk	3.60268e-294	2.3761	0.374	0.09	6.47762e-290	MHC-II+ ILC3	Cerk
Rrad	1.34906e-291	1.78856	0.651	0.394	2.42561e-287	MHC-II+ ILC3	Rrad
Txk	7.4801e-290	3.8229	0.277	0.023	1.34492e-285	MHC-II+ ILC3	Txk
Gpx4	5.20949e-289	0.699585	0.923	0.806	9.36666e-285	MHC-II+ ILC3	Gpx4
Ormdl3	1.53035e-287	3.16122	0.307	0.044	2.75158e-283	MHC-II+ ILC3	Ormdl3
Smap2	3.57256e-287	1.30915	0.597	0.299	6.42346e-283	MHC-II+ ILC3	Smap2
Gnas	5.6514e-287	0.570782	0.952	0.854	1.01612e-282	MHC-II+ ILC3	Gnas
Satb1	1.24357e-286	2.1084	0.38	0.094	2.23595e-282	MHC-II+ ILC3	Satb1
Tfip11	2.73627e-285	2.48133	0.359	0.084	4.91982e-281	MHC-II+ ILC3	Tfip11
Eef1a1	4.32064e-285	0.310603	1	1	7.7685e-281	MHC-II+ ILC3	Eef1a1
Cd96	1.72437e-284	2.61619	0.326	0.056	3.10041e-280	MHC-II+ ILC3	Cd96
Jmy	3.43062e-283	2.68083	0.336	0.066	6.16826e-279	MHC-II+ ILC3	Jmy
H2afy	3.5012e-282	1.02217	0.673	0.369	6.29516e-278	MHC-II+ ILC3	H2afy
Vars	6.32727e-282	1.57219	0.488	0.191	1.13764e-277	MHC-II+ ILC3	Vars
Gimap6	2.55324e-281	3.12852	0.313	0.052	4.59072e-277	MHC-II+ ILC3	Gimap6
Dnajb6	1.31523e-280	1.25944	0.695	0.446	2.36478e-276	MHC-II+ ILC3	Dnajb6
Itgav	6.29537e-278	2.31053	0.36	0.085	1.13191e-273	MHC-II+ ILC3	Itgav
Cited4	1.18961e-277	2.81954	0.321	0.057	2.13891e-273	MHC-II+ ILC3	Cited4
Rpl23a	1.21218e-277	0.423848	0.999	0.993	2.1795e-273	MHC-II+ ILC3	Rpl23a
Nop10	1.13962e-276	1.36365	0.57	0.279	2.04904e-272	MHC-II+ ILC3	Nop10
Tmed5	3.21512e-274	1.47447	0.507	0.211	5.78078e-270	MHC-II+ ILC3	Tmed5
Mapk10	2.55343e-273	3.80126	0.266	0.023	4.59106e-269	MHC-II+ ILC3	Mapk10
Sptbn1	3.61242e-273	2.12778	0.372	0.096	6.49513e-269	MHC-II+ ILC3	Sptbn1
Ccnl1	9.69547e-272	1.10036	0.689	0.423	1.74325e-267	MHC-II+ ILC3	Ccnl1
Rrp1	5.02269e-270	1.46965	0.535	0.252	9.0308e-266	MHC-II+ ILC3	Rrp1
Rpl14	1.15874e-269	0.444924	0.997	0.975	2.08342e-265	MHC-II+ ILC3	Rpl14
Arpc3	1.95209e-269	0.659195	0.945	0.902	3.50985e-265	MHC-II+ ILC3	Arpc3
Mbnl1	3.26858e-269	1.20894	0.588	0.294	5.8769e-265	MHC-II+ ILC3	Mbnl1
Ube2j1	1.36315e-268	1.56691	0.495	0.213	2.45094e-264	MHC-II+ ILC3	Ube2j1
Rps27	4.34323e-268	0.403437	1	0.999	7.80913e-264	MHC-II+ ILC3	Rps27
Rpl8	7.72815e-268	0.457732	0.997	0.967	1.38952e-263	MHC-II+ ILC3	Rpl8
Ptges	1.42948e-266	3.9775	0.27	0.03	2.57021e-262	MHC-II+ ILC3	Ptges
Tecr	8.36343e-266	1.14379	0.626	0.342	1.50375e-261	MHC-II+ ILC3	Tecr
Cd93	8.44909e-266	3.35939	0.277	0.033	1.51915e-261	MHC-II+ ILC3	Cd93
Rpl31	8.93487e-265	0.458015	0.998	0.976	1.60649e-260	MHC-II+ ILC3	Rpl31
Rps17	2.12594e-264	0.545258	0.973	0.888	3.82245e-260	MHC-II+ ILC3	Rps17
Laptm5	5.86362e-263	0.633965	0.931	0.773	1.05428e-258	MHC-II+ ILC3	Laptm5
Tut4	6.38611e-263	1.54256	0.48	0.194	1.14822e-258	MHC-II+ ILC3	Tut4
Foxs1	1.09549e-259	2.79869	0.304	0.054	1.96969e-255	MHC-II+ ILC3	Foxs1
Il1r1	4.6478e-259	2.9517	0.286	0.041	8.35675e-255	MHC-II+ ILC3	Il1r1
Pkm	3.30093e-257	1.01927	0.672	0.406	5.93507e-253	MHC-II+ ILC3	Pkm
Nop53	1.01491e-256	1.04569	0.749	0.545	1.82481e-252	MHC-II+ ILC3	Nop53
Bmp2	1.11904e-256	3.05401	0.291	0.047	2.01203e-252	MHC-II+ ILC3	Bmp2
Lcp2	2.86527e-256	2.35874	0.332	0.075	5.15175e-252	MHC-II+ ILC3	Lcp2
Chd2	4.77913e-256	1.32537	0.555	0.277	8.59287e-252	MHC-II+ ILC3	Chd2
Snrpb	1.07607e-254	1.00711	0.684	0.42	1.93477e-250	MHC-II+ ILC3	Snrpb
Rpl13	2.85489e-254	0.334911	1	0.999	5.1331e-250	MHC-II+ ILC3	Rpl13
Rps15	6.66054e-254	0.431455	0.998	0.983	1.19757e-249	MHC-II+ ILC3	Rps15
Purb	6.83746e-254	1.2016	0.616	0.349	1.22937e-249	MHC-II+ ILC3	Purb
Ssr2	6.99461e-254	1.37728	0.532	0.255	1.25763e-249	MHC-II+ ILC3	Ssr2
Gm47283	2.21769e-253	0.725104	0.816	0.574	3.98741e-249	MHC-II+ ILC3	Gm47283
Kcnk1	2.37548e-253	4.08576	0.242	0.017	4.27111e-249	MHC-II+ ILC3	Kcnk1
Prr29	3.00964e-253	2.37144	0.316	0.063	5.41133e-249	MHC-II+ ILC3	Prr29
Il23r	2.62833e-251	3.1957	0.263	0.03	4.72575e-247	MHC-II+ ILC3	Il23r
Coq8a	8.94695e-251	2.79641	0.29	0.048	1.60866e-246	MHC-II+ ILC3	Coq8a
Ahcyl2	9.86153e-250	1.44901	0.442	0.162	1.7731e-245	MHC-II+ ILC3	Ahcyl2
Smad3	1.59798e-249	2.52438	0.307	0.06	2.87317e-245	MHC-II+ ILC3	Smad3
Midn	1.736e-249	1.77153	0.415	0.145	3.12132e-245	MHC-II+ ILC3	Midn
Rps15a	5.3519e-249	0.39437	1	0.993	9.62271e-245	MHC-II+ ILC3	Rps15a
Dusp5	3.18927e-248	0.895123	0.737	0.501	5.73432e-244	MHC-II+ ILC3	Dusp5
Pop5	8.92567e-248	1.85276	0.431	0.167	1.60484e-243	MHC-II+ ILC3	Pop5
Sla	2.38623e-247	2.16761	0.371	0.112	4.29044e-243	MHC-II+ ILC3	Sla
Dynll1	3.11082e-247	0.786774	0.84	0.66	5.59326e-243	MHC-II+ ILC3	Dynll1
Dexi	8.75545e-247	1.78161	0.442	0.175	1.57423e-242	MHC-II+ ILC3	Dexi
Cotl1	2.35206e-246	1.1338	0.606	0.327	4.229e-242	MHC-II+ ILC3	Cotl1
Ezr	1.15281e-245	1.41704	0.51	0.235	2.07274e-241	MHC-II+ ILC3	Ezr
Elovl5	2.4742e-245	1.66675	0.465	0.197	4.44862e-241	MHC-II+ ILC3	Elovl5
Clint1	1.87816e-244	1.41967	0.512	0.242	3.37693e-240	MHC-II+ ILC3	Clint1
Ube2b	1.54702e-243	1.01988	0.665	0.408	2.78155e-239	MHC-II+ ILC3	Ube2b
2025-09-11	7.8992e-243	1.93226	0.367	0.108	1.42028e-238	MHC-II+ ILC3	2025-09-11
Hmces	1.3598e-242	2.83104	0.282	0.047	2.44493e-238	MHC-II+ ILC3	Hmces
Tmed10	2.94779e-242	1.07001	0.644	0.383	5.30013e-238	MHC-II+ ILC3	Tmed10
Tgfbr2	3.06762e-242	2.53964	0.298	0.058	5.51559e-238	MHC-II+ ILC3	Tgfbr2
Syncrip	8.05087e-242	1.29077	0.535	0.263	1.44755e-237	MHC-II+ ILC3	Syncrip
Arf4	3.02258e-241	0.622687	0.894	0.762	5.4346e-237	MHC-II+ ILC3	Arf4
Tmem176a	1.44805e-240	0.542661	0.972	0.839	2.6036e-236	MHC-II+ ILC3	Tmem176a
Areg	2.74281e-240	3.16035	0.28	0.048	4.93158e-236	MHC-II+ ILC3	Areg
Egln3	5.40699e-237	3.57198	0.252	0.03	9.72176e-233	MHC-II+ ILC3	Egln3
Sema4c	3.45429e-235	2.44473	0.309	0.07	6.21081e-231	MHC-II+ ILC3	Sema4c
Ago2	8.46307e-235	1.68078	0.416	0.154	1.52166e-230	MHC-II+ ILC3	Ago2
Sec62	1.05951e-233	1.21631	0.56	0.297	1.90501e-229	MHC-II+ ILC3	Sec62
Chad	3.90082e-233	3.8034	0.25	0.031	7.01367e-229	MHC-II+ ILC3	Chad
Il18rap	1.21634e-231	3.37883	0.241	0.025	2.18699e-227	MHC-II+ ILC3	Il18rap
Rpl37a	2.3729e-231	0.431723	1	0.997	4.26647e-227	MHC-II+ ILC3	Rpl37a
Acat1	1.03361e-230	1.80466	0.381	0.128	1.85843e-226	MHC-II+ ILC3	Acat1
Mapkapk3	3.68011e-230	1.77734	0.394	0.14	6.61684e-226	MHC-II+ ILC3	Mapkapk3
Rpl36a	8.05714e-230	0.543603	0.954	0.876	1.44867e-225	MHC-II+ ILC3	Rpl36a
Cdk2ap2	4.42414e-228	1.46513	0.452	0.19	7.9546e-224	MHC-II+ ILC3	Cdk2ap2
Slc38a1	5.85313e-228	1.59403	0.408	0.149	1.05239e-223	MHC-II+ ILC3	Slc38a1
Tmem176b	6.73744e-227	0.471943	0.992	0.897	1.21139e-222	MHC-II+ ILC3	Tmem176b
Ndel1	2.69419e-226	1.54049	0.453	0.196	4.84415e-222	MHC-II+ ILC3	Ndel1
Spn	2.7528e-226	2.68162	0.272	0.047	4.94954e-222	MHC-II+ ILC3	Spn
Ecm1	7.30056e-225	3.83751	0.23	0.022	1.31264e-220	MHC-II+ ILC3	Ecm1
Xlr4c	1.48666e-223	3.0881	0.242	0.029	2.67301e-219	MHC-II+ ILC3	Xlr4c
Limd2	3.08558e-221	0.847719	0.736	0.511	5.54788e-217	MHC-II+ ILC3	Limd2
Rasal3	3.26522e-220	2.67713	0.264	0.045	5.87086e-216	MHC-II+ ILC3	Rasal3
Ddx6	3.72982e-220	0.968785	0.667	0.419	6.70621e-216	MHC-II+ ILC3	Ddx6
Gimap5	2.57491e-219	3.13632	0.245	0.034	4.62968e-215	MHC-II+ ILC3	Gimap5
Ugcg	4.19335e-219	2.51439	0.285	0.061	7.53964e-215	MHC-II+ ILC3	Ugcg
Tcrg-C1	6.56322e-219	4.9114	0.209	0.012	1.18007e-214	MHC-II+ ILC3	Tcrg-C1
Akap12	6.64538e-219	4.25834	0.23	0.025	1.19484e-214	MHC-II+ ILC3	Akap12
Nab1	5.84141e-218	1.60015	0.415	0.164	1.05029e-213	MHC-II+ ILC3	Nab1
Cnp	1.23026e-217	2.32503	0.297	0.07	2.212e-213	MHC-II+ ILC3	Cnp
Serpina3g	5.51205e-217	1.55366	0.443	0.19	9.91066e-213	MHC-II+ ILC3	Serpina3g
Tnfrsf9	6.27357e-216	1.55988	0.498	0.256	1.12799e-211	MHC-II+ ILC3	Tnfrsf9
Pdcd1	8.06541e-216	3.86193	0.218	0.019	1.45016e-211	MHC-II+ ILC3	Pdcd1
Klrb1f	1.05696e-215	3.53477	0.223	0.021	1.90041e-211	MHC-II+ ILC3	Klrb1f
Tle5	2.34599e-215	0.852641	0.73	0.532	4.21808e-211	MHC-II+ ILC3	Tle5
Nsd3	1.0682e-214	1.24077	0.529	0.274	1.92062e-210	MHC-II+ ILC3	Nsd3
Znrf1	2.59197e-214	1.59298	0.41	0.162	4.66036e-210	MHC-II+ ILC3	Znrf1
Gabarapl2	4.35149e-213	1.07424	0.588	0.337	7.82398e-209	MHC-II+ ILC3	Gabarapl2
Tnik	1.12293e-212	3.05107	0.233	0.028	2.01902e-208	MHC-II+ ILC3	Tnik
Hnrnpa0	1.54824e-212	0.904338	0.681	0.443	2.78374e-208	MHC-II+ ILC3	Hnrnpa0
Zc3h12a	8.21976e-212	1.51551	0.418	0.169	1.47791e-207	MHC-II+ ILC3	Zc3h12a
Fkbp3	1.20838e-211	1.53317	0.418	0.17	2.17266e-207	MHC-II+ ILC3	Fkbp3
Tln1	1.62762e-211	0.941266	0.64	0.386	2.92646e-207	MHC-II+ ILC3	Tln1
Rpl3	4.93544e-211	0.447879	0.98	0.925	8.87391e-207	MHC-II+ ILC3	Rpl3
Emp3	1.98082e-210	0.975206	0.583	0.314	3.56152e-206	MHC-II+ ILC3	Emp3
Ap3s1	4.69728e-210	1.54353	0.412	0.167	8.44571e-206	MHC-II+ ILC3	Ap3s1
Mapkapk2	1.81364e-209	1.24227	0.515	0.265	3.26092e-205	MHC-II+ ILC3	Mapkapk2
Gramd1a	1.88871e-209	1.29649	0.468	0.213	3.3959e-205	MHC-II+ ILC3	Gramd1a
Xbp1	1.76678e-208	1.57342	0.414	0.171	3.17667e-204	MHC-II+ ILC3	Xbp1
Gatad1	6.15655e-208	1.73635	0.408	0.171	1.10695e-203	MHC-II+ ILC3	Gatad1
Ssh2	9.38902e-208	1.94347	0.322	0.092	1.68815e-203	MHC-II+ ILC3	Ssh2
Paip2	1.41529e-207	1.17953	0.541	0.293	2.54469e-203	MHC-II+ ILC3	Paip2
Tnfrsf18	1.69563e-207	1.64799	0.401	0.16	3.04875e-203	MHC-II+ ILC3	Tnfrsf18
Batf	3.16867e-207	2.34878	0.293	0.072	5.69727e-203	MHC-II+ ILC3	Batf
Tox2	9.98013e-206	3.01504	0.234	0.032	1.79443e-201	MHC-II+ ILC3	Tox2
Vps28	1.65809e-205	1.07898	0.584	0.341	2.98125e-201	MHC-II+ ILC3	Vps28
Maf	3.28239e-205	3.46881	0.216	0.022	5.90173e-201	MHC-II+ ILC3	Maf
Cenpa	5.28178e-205	2.24097	0.294	0.074	9.49664e-201	MHC-II+ ILC3	Cenpa
Rps13	8.74706e-205	0.375845	0.997	0.985	1.57272e-200	MHC-II+ ILC3	Rps13
Rab37	1.03835e-204	2.85152	0.241	0.038	1.86696e-200	MHC-II+ ILC3	Rab37
Diaph1	1.49095e-204	1.55841	0.394	0.153	2.68074e-200	MHC-II+ ILC3	Diaph1
Agpat5	8.93759e-202	2.30037	0.283	0.067	1.60698e-197	MHC-II+ ILC3	Agpat5
Magoh	1.38579e-201	1.28747	0.496	0.252	2.49165e-197	MHC-II+ ILC3	Magoh
Rpl17	2.9938e-201	0.30357	1	0.998	5.38285e-197	MHC-II+ ILC3	Rpl17
Coq10b	5.09396e-201	1.2046	0.493	0.241	9.15893e-197	MHC-II+ ILC3	Coq10b
Per1	1.39072e-200	1.40438	0.42	0.176	2.50051e-196	MHC-II+ ILC3	Per1
Rps3	2.26479e-200	0.332663	1	0.994	4.07209e-196	MHC-II+ ILC3	Rps3
Abhd17b	5.48961e-200	1.99195	0.31	0.088	9.87032e-196	MHC-II+ ILC3	Abhd17b
Rinl	1.01672e-198	1.9898	0.312	0.09	1.82806e-194	MHC-II+ ILC3	Rinl
Arl5b	1.05717e-198	2.22724	0.287	0.073	1.90079e-194	MHC-II+ ILC3	Arl5b
Ctse	3.4832e-197	2.85468	0.23	0.034	6.26279e-193	MHC-II+ ILC3	Ctse
Rps14	9.52168e-197	0.307567	1	0.997	1.712e-192	MHC-II+ ILC3	Rps14
Fam102a	3.5507e-196	3.08428	0.222	0.029	6.38416e-192	MHC-II+ ILC3	Fam102a
Cxcr5	4.09619e-196	2.42981	0.26	0.054	7.36496e-192	MHC-II+ ILC3	Cxcr5
Itgal	7.60676e-196	2.44457	0.255	0.05	1.36769e-191	MHC-II+ ILC3	Itgal
Rpl36	1.78594e-195	0.437432	0.991	0.971	3.21112e-191	MHC-II+ ILC3	Rpl36
Atp5a1	5.5161e-195	0.678755	0.791	0.604	9.91794e-191	MHC-II+ ILC3	Atp5a1
Tinf2	1.61956e-192	1.83893	0.34	0.117	2.91197e-188	MHC-II+ ILC3	Tinf2
Eef2	2.80298e-192	0.478178	0.948	0.873	5.03977e-188	MHC-II+ ILC3	Eef2
Wls	4.42555e-192	2.34372	0.261	0.057	7.95713e-188	MHC-II+ ILC3	Wls
Nfil3	5.28317e-192	0.909579	0.584	0.326	9.49914e-188	MHC-II+ ILC3	Nfil3
Ndufa13	7.43097e-192	0.920925	0.64	0.413	1.33609e-187	MHC-II+ ILC3	Ndufa13
Glrx5	9.95762e-192	1.70602	0.355	0.129	1.79038e-187	MHC-II+ ILC3	Glrx5
Mcrip2	2.28183e-191	2.32015	0.273	0.066	4.10273e-187	MHC-II+ ILC3	Mcrip2
Eif4e	8.22997e-190	1.80539	0.356	0.133	1.47975e-185	MHC-II+ ILC3	Eif4e
Acap1	1.0228e-189	2.54137	0.242	0.045	1.83899e-185	MHC-II+ ILC3	Acap1
Gstp3	1.70869e-189	3.38195	0.209	0.025	3.07222e-185	MHC-II+ ILC3	Gstp3
Tspan32	6.13194e-188	3.79596	0.191	0.015	1.10252e-183	MHC-II+ ILC3	Tspan32
Tm2d2	6.35461e-188	1.55157	0.405	0.176	1.14256e-183	MHC-II+ ILC3	Tm2d2
Eml4	2.25157e-187	1.60524	0.361	0.135	4.04833e-183	MHC-II+ ILC3	Eml4
Tecpr1	7.81693e-187	2.58474	0.241	0.047	1.40548e-182	MHC-II+ ILC3	Tecpr1
Rpl22	8.63788e-187	0.468459	0.954	0.897	1.55309e-182	MHC-II+ ILC3	Rpl22
Pld3	3.50394e-186	2.26856	0.263	0.062	6.30009e-182	MHC-II+ ILC3	Pld3
Aff1	4.61596e-186	1.47296	0.4	0.17	8.29949e-182	MHC-II+ ILC3	Aff1
Igf1r	4.71602e-186	2.16339	0.27	0.065	8.4794e-182	MHC-II+ ILC3	Igf1r
Map2k3	4.68434e-185	1.68432	0.34	0.119	8.42244e-181	MHC-II+ ILC3	Map2k3
Amz2	1.14212e-184	2.23013	0.271	0.068	2.05353e-180	MHC-II+ ILC3	Amz2
Zc3h13	5.80906e-184	1.38696	0.424	0.193	1.04447e-179	MHC-II+ ILC3	Zc3h13
Rpl18	8.01355e-184	0.32462	0.999	0.995	1.44084e-179	MHC-II+ ILC3	Rpl18
Rps11	1.36409e-182	0.316372	1	0.997	2.45263e-178	MHC-II+ ILC3	Rps11
Gtf2i	1.38685e-182	1.69862	0.327	0.11	2.49355e-178	MHC-II+ ILC3	Gtf2i
Grcc10	1.89326e-182	1.24869	0.458	0.225	3.40409e-178	MHC-II+ ILC3	Grcc10
Pabpc1	6.83432e-182	0.557287	0.963	0.934	1.22881e-177	MHC-II+ ILC3	Pabpc1
Rpl36al	1.08876e-181	0.724894	0.769	0.593	1.95759e-177	MHC-II+ ILC3	Rpl36al
Tnip1	1.86487e-181	1.07273	0.523	0.284	3.35303e-177	MHC-II+ ILC3	Tnip1
Cdc14a	5.94102e-181	1.7201	0.345	0.128	1.0682e-176	MHC-II+ ILC3	Cdc14a
Ptpn18	1.44933e-180	0.969171	0.559	0.315	2.60589e-176	MHC-II+ ILC3	Ptpn18
Rprd1b	2.68175e-179	2.41368	0.26	0.064	4.82179e-175	MHC-II+ ILC3	Rprd1b
Capg	3.58975e-179	1.15214	0.405	0.166	6.45438e-175	MHC-II+ ILC3	Capg
Hnrnpab	6.67609e-179	0.767156	0.665	0.425	1.20036e-174	MHC-II+ ILC3	Hnrnpab
Rpl29	5.19159e-177	0.37306	0.994	0.972	9.33448e-173	MHC-II+ ILC3	Rpl29
Srrm2	2.26061e-176	0.548643	0.841	0.657	4.06458e-172	MHC-II+ ILC3	Srrm2
Itpr2	3.80299e-176	2.3003	0.236	0.047	6.83778e-172	MHC-II+ ILC3	Itpr2
S1pr1	5.57202e-176	2.85065	0.215	0.035	1.00185e-171	MHC-II+ ILC3	S1pr1
Pja1	9.12301e-176	2.2004	0.27	0.073	1.64032e-171	MHC-II+ ILC3	Pja1
Rell1	1.34457e-175	2.11857	0.265	0.068	2.41754e-171	MHC-II+ ILC3	Rell1
Csk	1.56557e-175	1.38479	0.399	0.176	2.81489e-171	MHC-II+ ILC3	Csk
Itgb3	2.26821e-175	2.50948	0.225	0.041	4.07825e-171	MHC-II+ ILC3	Itgb3
Adgrg5	7.08983e-175	2.40842	0.233	0.046	1.27475e-170	MHC-II+ ILC3	Adgrg5
Aff4	2.59447e-174	1.18097	0.453	0.22	4.66486e-170	MHC-II+ ILC3	Aff4
Eef2k	4.2297e-174	3.03804	0.201	0.027	7.60501e-170	MHC-II+ ILC3	Eef2k
Pim2	1.47191e-173	2.33738	0.248	0.058	2.64649e-169	MHC-II+ ILC3	Pim2
Gstp1	3.17157e-173	1.61236	0.332	0.121	5.70249e-169	MHC-II+ ILC3	Gstp1
Manf	4.68026e-173	1.11918	0.493	0.266	8.4151e-169	MHC-II+ ILC3	Manf
Pqbp1	8.09431e-172	1.59634	0.344	0.132	1.45536e-167	MHC-II+ ILC3	Pqbp1
Arhgef28	4.26935e-171	2.60804	0.215	0.036	7.67629e-167	MHC-II+ ILC3	Arhgef28
Tcp11l2	1.41568e-170	2.40367	0.233	0.049	2.5454e-166	MHC-II+ ILC3	Tcp11l2
Rnaseh2c	1.54538e-170	1.62438	0.329	0.119	2.7786e-166	MHC-II+ ILC3	Rnaseh2c
Ssbp3	3.51137e-170	1.95748	0.273	0.077	6.31344e-166	MHC-II+ ILC3	Ssbp3
Rpl10a	5.18965e-170	0.367059	0.988	0.949	9.33099e-166	MHC-II+ ILC3	Rpl10a
Pop4	1.57309e-169	1.94661	0.293	0.094	2.82841e-165	MHC-II+ ILC3	Pop4
Ldhb	7.78071e-169	2.15258	0.246	0.057	1.39897e-164	MHC-II+ ILC3	Ldhb
Def6	1.08459e-168	2.24772	0.245	0.058	1.9501e-164	MHC-II+ ILC3	Def6
Rpn1	2.34782e-168	1.75752	0.315	0.111	4.22138e-164	MHC-II+ ILC3	Rpn1
Igfbp7	5.95377e-168	3.55493	0.174	0.014	1.07049e-163	MHC-II+ ILC3	Igfbp7
Esyt1	7.38689e-168	1.81138	0.294	0.095	1.32816e-163	MHC-II+ ILC3	Esyt1
Senp6	1.60925e-167	1.1136	0.471	0.242	2.89343e-163	MHC-II+ ILC3	Senp6
Tnfsf8	7.75278e-167	4.09344	0.174	0.014	1.39395e-162	MHC-II+ ILC3	Tnfsf8
Il1rl2	6.1709e-166	3.57252	0.18	0.018	1.10953e-161	MHC-II+ ILC3	Il1rl2
Rpl6	2.11981e-165	0.319201	0.998	0.984	3.81143e-161	MHC-II+ ILC3	Rpl6
Eif4g2	2.42487e-165	0.619193	0.81	0.656	4.35991e-161	MHC-II+ ILC3	Eif4g2
Rack1	2.56345e-165	0.386376	0.979	0.928	4.60908e-161	MHC-II+ ILC3	Rack1
Cisd2	3.51223e-165	1.27912	0.426	0.21	6.315e-161	MHC-II+ ILC3	Cisd2
Rpl9	2.35337e-164	0.287814	1	0.997	4.23136e-160	MHC-II+ ILC3	Rpl9
Sun2	2.78087e-164	1.49391	0.349	0.14	5.00001e-160	MHC-II+ ILC3	Sun2
Atf3	3.20798e-164	1.15304	0.418	0.197	5.76795e-160	MHC-II+ ILC3	Atf3
Agpat3	3.76139e-163	2.07428	0.246	0.061	6.76298e-159	MHC-II+ ILC3	Agpat3
Stap1	5.018e-163	1.92757	0.264	0.074	9.02236e-159	MHC-II+ ILC3	Stap1
Ahnak	7.65094e-163	0.718151	0.571	0.322	1.37564e-158	MHC-II+ ILC3	Ahnak
Zbtb1	1.54347e-162	1.52702	0.351	0.144	2.77516e-158	MHC-II+ ILC3	Zbtb1
Usp38	1.62798e-162	1.83478	0.296	0.1	2.9271e-158	MHC-II+ ILC3	Usp38
Mvk	2.133e-162	2.30307	0.253	0.068	3.83514e-158	MHC-II+ ILC3	Mvk
Ndufb11	2.18432e-162	0.876056	0.588	0.367	3.92741e-158	MHC-II+ ILC3	Ndufb11
Atp1b3	3.16369e-162	1.15414	0.453	0.231	5.68832e-158	MHC-II+ ILC3	Atp1b3
Bik	5.62525e-162	3.64072	0.175	0.017	1.01142e-157	MHC-II+ ILC3	Bik
Rbl2	7.62333e-162	1.51588	0.336	0.13	1.37067e-157	MHC-II+ ILC3	Rbl2
Tnfaip8l2	8.47929e-162	2.32265	0.239	0.058	1.52458e-157	MHC-II+ ILC3	Tnfaip8l2
Ptp4a2	4.5357e-161	0.89428	0.59	0.378	8.15518e-157	MHC-II+ ILC3	Ptp4a2
Rpn2	9.69131e-161	1.1988	0.431	0.214	1.7425e-156	MHC-II+ ILC3	Rpn2
Arl6ip1	1.43402e-160	0.762856	0.663	0.458	2.57837e-156	MHC-II+ ILC3	Arl6ip1
Ptprc	2.10312e-160	0.67128	0.721	0.511	3.78141e-156	MHC-II+ ILC3	Ptprc
Bnip3l	2.09995e-159	1.15701	0.445	0.228	3.77571e-155	MHC-II+ ILC3	Bnip3l
Znrd1	3.72886e-159	1.5581	0.346	0.142	6.7045e-155	MHC-II+ ILC3	Znrd1
Dok2	3.99743e-159	3.58697	0.167	0.014	7.18737e-155	MHC-II+ ILC3	Dok2
Ankrd11	1.54993e-158	0.807106	0.573	0.341	2.78678e-154	MHC-II+ ILC3	Ankrd11
Mgat5	3.75993e-158	2.07946	0.232	0.053	6.76036e-154	MHC-II+ ILC3	Mgat5
Slco3a1	6.85743e-157	2.78355	0.192	0.03	1.23297e-152	MHC-II+ ILC3	Slco3a1
Utrn	6.87234e-157	1.57888	0.295	0.098	1.23565e-152	MHC-II+ ILC3	Utrn
Sh3kbp1	9.88904e-157	1.25685	0.389	0.178	1.77805e-152	MHC-II+ ILC3	Sh3kbp1
Scn1b	1.25092e-156	3.68998	0.165	0.014	2.24915e-152	MHC-II+ ILC3	Scn1b
Btg3	3.82e-156	2.21732	0.235	0.058	6.86836e-152	MHC-II+ ILC3	Btg3
Stk10	6.24222e-156	2.23495	0.224	0.05	1.12235e-151	MHC-II+ ILC3	Stk10
Mppe1	2.29772e-155	2.40106	0.219	0.047	4.1313e-151	MHC-II+ ILC3	Mppe1
Tagln2	8.68515e-155	0.238445	0.965	0.861	1.56159e-150	MHC-II+ ILC3	Tagln2
Baiap2	3.48045e-154	1.92289	0.276	0.09	6.25784e-150	MHC-II+ ILC3	Baiap2
Sap18	3.73397e-154	1.53706	0.477	0.279	6.71368e-150	MHC-II+ ILC3	Sap18
Il27ra	2.88395e-153	2.69581	0.193	0.032	5.18535e-149	MHC-II+ ILC3	Il27ra
Trbc1	5.15463e-153	3.48141	0.183	0.027	9.26802e-149	MHC-II+ ILC3	Trbc1
Snrpg	5.09042e-152	0.63874	0.801	0.665	9.15257e-148	MHC-II+ ILC3	Snrpg
Tgoln1	1.4143e-151	1.03144	0.486	0.271	2.5429e-147	MHC-II+ ILC3	Tgoln1
Chn2	1.85917e-151	1.69873	0.268	0.082	3.34278e-147	MHC-II+ ILC3	Chn2
mt-Nd3	2.30784e-151	0.565583	0.787	0.611	4.1495e-147	MHC-II+ ILC3	mt-Nd3
Errfi1	6.02825e-151	2.48979	0.225	0.055	1.08388e-146	MHC-II+ ILC3	Errfi1
Itgb2	7.60714e-151	1.437	0.323	0.124	1.36776e-146	MHC-II+ ILC3	Itgb2
Ldb1	1.02082e-150	1.33486	0.364	0.161	1.83543e-146	MHC-II+ ILC3	Ldb1
Prelid2	2.89735e-149	2.76394	0.192	0.033	5.20943e-145	MHC-II+ ILC3	Prelid2
Nr4a2	4.13149e-149	0.73961	0.536	0.301	7.42843e-145	MHC-II+ ILC3	Nr4a2
Eya2	5.39547e-149	4.25258	0.148	0.008	9.70106e-145	MHC-II+ ILC3	Eya2
Ralgps2	3.08929e-148	3.00389	0.18	0.027	5.55454e-144	MHC-II+ ILC3	Ralgps2
Rps4x	5.10483e-148	0.281029	0.999	0.989	9.17848e-144	MHC-II+ ILC3	Rps4x
Ppp1r3b	6.68893e-148	4.27564	0.149	0.009	1.20267e-143	MHC-II+ ILC3	Ppp1r3b
Stk11	3.04798e-147	1.27214	0.364	0.162	5.48027e-143	MHC-II+ ILC3	Stk11
AI506816	8.26218e-146	1.59301	0.309	0.12	1.48554e-141	MHC-II+ ILC3	AI506816
Gdpd5	1.10028e-145	2.46133	0.191	0.034	1.9783e-141	MHC-II+ ILC3	Gdpd5
Fli1	1.65599e-145	2.30186	0.205	0.043	2.97748e-141	MHC-II+ ILC3	Fli1
Slc15a3	1.88908e-145	1.6098	0.309	0.119	3.39656e-141	MHC-II+ ILC3	Slc15a3
Nudt4	4.16159e-145	2.1272	0.244	0.072	7.48254e-141	MHC-II+ ILC3	Nudt4
Pecam1	6.26656e-145	2.30862	0.204	0.043	1.12673e-140	MHC-II+ ILC3	Pecam1
Srpr	1.23293e-144	1.11543	0.432	0.226	2.21681e-140	MHC-II+ ILC3	Srpr
Hsp90aa1	1.40201e-144	0.427676	0.888	0.734	2.52082e-140	MHC-II+ ILC3	Hsp90aa1
Hnrnpa3	1.52974e-144	0.560625	0.815	0.664	2.75048e-140	MHC-II+ ILC3	Hnrnpa3
Rcc2	2.67175e-144	1.49672	0.328	0.137	4.80381e-140	MHC-II+ ILC3	Rcc2
Csrnp1	3.34139e-144	0.858133	0.494	0.275	6.00782e-140	MHC-II+ ILC3	Csrnp1
Gstm1	7.0049e-144	2.67443	0.183	0.03	1.25948e-139	MHC-II+ ILC3	Gstm1
Ndufa4	8.0552e-144	0.645913	0.739	0.57	1.44833e-139	MHC-II+ ILC3	Ndufa4
Usp36	5.51316e-143	2.19172	0.22	0.055	9.91266e-139	MHC-II+ ILC3	Usp36
Por	2.54132e-141	2.25121	0.224	0.059	4.56929e-137	MHC-II+ ILC3	Por
Pitpna	3.76259e-141	0.93306	0.486	0.278	6.76513e-137	MHC-II+ ILC3	Pitpna
Dhx40	8.77862e-141	2.06863	0.221	0.056	1.5784e-136	MHC-II+ ILC3	Dhx40
Rock1	2.41346e-140	1.00623	0.489	0.285	4.33941e-136	MHC-II+ ILC3	Rock1
Mfsd6	2.41848e-140	1.91516	0.243	0.073	4.34843e-136	MHC-II+ ILC3	Mfsd6
Timm23	3.37285e-140	0.978248	0.491	0.286	6.06438e-136	MHC-II+ ILC3	Timm23
Gabpb1	9.82824e-140	1.58696	0.339	0.154	1.76712e-135	MHC-II+ ILC3	Gabpb1
Ms4a4b	1.30119e-139	2.7526	0.171	0.025	2.33954e-135	MHC-II+ ILC3	Ms4a4b
Cd69	2.5975e-139	2.22165	0.211	0.05	4.6703e-135	MHC-II+ ILC3	Cd69
Mdh1	1.03492e-137	0.816184	0.584	0.389	1.86078e-133	MHC-II+ ILC3	Mdh1
Lta	9.69765e-137	2.92395	0.196	0.043	1.74364e-132	MHC-II+ ILC3	Lta
Abhd8	1.15401e-136	2.57736	0.182	0.034	2.07492e-132	MHC-II+ ILC3	Abhd8
Lbr	1.37839e-136	2.02359	0.225	0.062	2.47835e-132	MHC-II+ ILC3	Lbr
Skap1	5.39792e-136	3.50281	0.147	0.013	9.70545e-132	MHC-II+ ILC3	Skap1
Txndc11	6.20934e-136	1.54293	0.313	0.132	1.11644e-131	MHC-II+ ILC3	Txndc11
Abcb9	1.1448e-135	3.30529	0.154	0.017	2.05834e-131	MHC-II+ ILC3	Abcb9
Rplp2	1.15369e-135	0.231667	1	0.997	2.07434e-131	MHC-II+ ILC3	Rplp2
Rpl13a	1.87943e-135	0.549448	0.815	0.69	3.37921e-131	MHC-II+ ILC3	Rpl13a
Rorc	3.04152e-135	1.65607	0.238	0.07	5.46865e-131	MHC-II+ ILC3	Rorc
Tox	4.48318e-135	2.14529	0.197	0.043	8.06075e-131	MHC-II+ ILC3	Tox
Ubald1	6.37374e-135	1.51639	0.311	0.129	1.146e-130	MHC-II+ ILC3	Ubald1
Rnft1	9.83532e-135	2.18526	0.212	0.054	1.76839e-130	MHC-II+ ILC3	Rnft1
Snx1	9.94494e-135	1.22137	0.379	0.186	1.7881e-130	MHC-II+ ILC3	Snx1
Rpl30	1.59652e-134	0.266957	0.999	0.993	2.87055e-130	MHC-II+ ILC3	Rpl30
Sod2	2.04933e-134	1.1692	0.39	0.195	3.68469e-130	MHC-II+ ILC3	Sod2
Pabpc4	2.49298e-134	1.51248	0.294	0.115	4.48238e-130	MHC-II+ ILC3	Pabpc4
Rps5	4.43446e-134	0.269402	0.999	0.99	7.97316e-130	MHC-II+ ILC3	Rps5
Plk3	1.26454e-133	3.00928	0.161	0.022	2.27365e-129	MHC-II+ ILC3	Plk3
Ost4	1.6881e-133	0.75046	0.627	0.436	3.0352e-129	MHC-II+ ILC3	Ost4
Isca1	2.07773e-133	2.29215	0.194	0.042	3.73576e-129	MHC-II+ ILC3	Isca1
Mlec	2.2185e-133	1.50405	0.298	0.119	3.98887e-129	MHC-II+ ILC3	Mlec
Ctsd	3.96578e-133	1.36515	0.281	0.104	7.13047e-129	MHC-II+ ILC3	Ctsd
Mien1	1.19094e-132	1.0742	0.449	0.256	2.14132e-128	MHC-II+ ILC3	Mien1
Tnks2	2.75106e-132	1.07327	0.416	0.221	4.9464e-128	MHC-II+ ILC3	Tnks2
Tor1aip1	3.17269e-132	1.06626	0.444	0.25	5.7045e-128	MHC-II+ ILC3	Tor1aip1
Tmem64	5.85233e-132	2.40114	0.2	0.048	1.05225e-127	MHC-II+ ILC3	Tmem64
Inpp1	8.55073e-132	2.54549	0.186	0.039	1.53742e-127	MHC-II+ ILC3	Inpp1
Impdh2	8.64062e-132	1.25384	0.455	0.265	1.55358e-127	MHC-II+ ILC3	Impdh2
Faah	9.41839e-132	2.99753	0.159	0.022	1.69343e-127	MHC-II+ ILC3	Faah
Tomm20	1.03329e-131	0.775361	0.592	0.397	1.85786e-127	MHC-II+ ILC3	Tomm20
Jdp2	1.30475e-131	1.48029	0.282	0.106	2.34594e-127	MHC-II+ ILC3	Jdp2
Ddx21	1.45755e-131	1.12087	0.387	0.194	2.62067e-127	MHC-II+ ILC3	Ddx21
Cldnd1	2.64415e-131	1.38775	0.322	0.14	4.75418e-127	MHC-II+ ILC3	Cldnd1
Wsb1	3.17481e-131	1.06669	0.411	0.215	5.70831e-127	MHC-II+ ILC3	Wsb1
mt-Nd5	1.88567e-130	0.341871	0.971	0.9	3.39044e-126	MHC-II+ ILC3	mt-Nd5
Spry2	6.66473e-130	2.67548	0.169	0.029	1.19832e-125	MHC-II+ ILC3	Spry2
Csnk1g2	8.40057e-130	1.49102	0.292	0.116	1.51042e-125	MHC-II+ ILC3	Csnk1g2
Arg1	1.50376e-129	3.94003	0.137	0.01	2.70375e-125	MHC-II+ ILC3	Arg1
Tab2	1.1066e-128	0.882992	0.519	0.323	1.98966e-124	MHC-II+ ILC3	Tab2
Bcap31	1.15396e-128	1.10203	0.403	0.212	2.07482e-124	MHC-II+ ILC3	Bcap31
Iqgap2	1.23319e-128	1.84291	0.22	0.061	2.21728e-124	MHC-II+ ILC3	Iqgap2
Ythdc1	1.51791e-128	0.916615	0.486	0.288	2.7292e-124	MHC-II+ ILC3	Ythdc1
Tatdn2	1.83275e-128	1.6825	0.256	0.09	3.29529e-124	MHC-II+ ILC3	Tatdn2
Hint1	1.04443e-127	0.686312	0.637	0.437	1.87788e-123	MHC-II+ ILC3	Hint1
Bst2	1.87812e-127	0.752781	0.566	0.365	3.37687e-123	MHC-II+ ILC3	Bst2
Tra2a	6.50007e-127	0.923132	0.462	0.264	1.16871e-122	MHC-II+ ILC3	Tra2a
Nebl	7.08026e-127	3.08993	0.149	0.018	1.27303e-122	MHC-II+ ILC3	Nebl
Rpl18a	2.17904e-126	0.23004	1	0.999	3.91791e-122	MHC-II+ ILC3	Rpl18a
Apol7e	3.78574e-126	4.3406	0.126	0.006	6.80676e-122	MHC-II+ ILC3	Apol7e
Dgka	6.36417e-126	1.96509	0.219	0.064	1.14428e-121	MHC-II+ ILC3	Dgka
Pink1	1.62715e-125	1.68204	0.252	0.088	2.92562e-121	MHC-II+ ILC3	Pink1
Gimap4	3.09465e-125	3.07317	0.154	0.023	5.56419e-121	MHC-II+ ILC3	Gimap4
Bclaf3	4.4342e-125	2.09065	0.212	0.06	7.9727e-121	MHC-II+ ILC3	Bclaf3
Serinc2	5.13416e-125	3.93426	0.132	0.01	9.23122e-121	MHC-II+ ILC3	Serinc2
Srsf6	6.72625e-125	0.970461	0.457	0.266	1.20938e-120	MHC-II+ ILC3	Srsf6
Slbp	8.31606e-125	1.20286	0.363	0.18	1.49523e-120	MHC-II+ ILC3	Slbp
Pnrc1	3.49217e-124	0.381226	0.827	0.654	6.27891e-120	MHC-II+ ILC3	Pnrc1
Piwil4	9.04137e-124	2.93775	0.154	0.023	1.62564e-119	MHC-II+ ILC3	Piwil4
Gpr171	1.26987e-123	1.4854	0.233	0.072	2.28323e-119	MHC-II+ ILC3	Gpr171
Gm50431	2.20864e-123	3.66425	0.135	0.012	3.97113e-119	MHC-II+ ILC3	Gm50431
Grk6	2.36912e-123	1.71844	0.237	0.078	4.25967e-119	MHC-II+ ILC3	Grk6
Gata3	2.54292e-123	3.10268	0.15	0.021	4.57218e-119	MHC-II+ ILC3	Gata3
Dgkz	3.41073e-123	2.21347	0.188	0.044	6.13249e-119	MHC-II+ ILC3	Dgkz
Fhl2	5.67876e-123	3.75127	0.134	0.012	1.02104e-118	MHC-II+ ILC3	Fhl2
Nfatc1	6.51825e-123	1.79678	0.228	0.072	1.17198e-118	MHC-II+ ILC3	Nfatc1
Gpn3	3.14679e-122	1.71975	0.246	0.086	5.65794e-118	MHC-II+ ILC3	Gpn3
Dgkd	5.58244e-122	1.54528	0.257	0.093	1.00372e-117	MHC-II+ ILC3	Dgkd
Nolc1	8.10676e-122	1.30248	0.305	0.129	1.45759e-117	MHC-II+ ILC3	Nolc1
Ndufa5	1.68323e-121	1.32878	0.322	0.148	3.02645e-117	MHC-II+ ILC3	Ndufa5
Vgll4	1.58653e-120	1.57433	0.266	0.102	2.85258e-116	MHC-II+ ILC3	Vgll4
Tmem258	2.70598e-120	0.83272	0.546	0.366	4.86535e-116	MHC-II+ ILC3	Tmem258
Tmem243	3.65324e-120	1.13249	0.372	0.191	6.56852e-116	MHC-II+ ILC3	Tmem243
Grap2	7.12987e-120	2.93991	0.151	0.023	1.28195e-115	MHC-II+ ILC3	Grap2
Pim3	8.06443e-120	1.41335	0.303	0.134	1.44999e-115	MHC-II+ ILC3	Pim3
Arhgef1	2.04193e-119	1.08251	0.381	0.198	3.67138e-115	MHC-II+ ILC3	Arhgef1
Sla2	2.48162e-119	3.14958	0.143	0.019	4.46196e-115	MHC-II+ ILC3	Sla2
Gbp7	3.16713e-119	2.67689	0.145	0.019	5.69451e-115	MHC-II+ ILC3	Gbp7
Esyt2	7.83053e-119	1.26434	0.317	0.144	1.40793e-114	MHC-II+ ILC3	Esyt2
Amd1	1.01831e-118	1.88981	0.218	0.068	1.83092e-114	MHC-II+ ILC3	Amd1
Prkd3	5.00934e-118	1.714	0.236	0.081	9.00679e-114	MHC-II+ ILC3	Prkd3
Ndufv3	2.91183e-117	0.88302	0.491	0.309	5.23547e-113	MHC-II+ ILC3	Ndufv3
Ssb	6.18991e-117	0.735138	0.583	0.401	1.11295e-112	MHC-II+ ILC3	Ssb
Atp5g3	6.22747e-117	0.76736	0.561	0.376	1.1197e-112	MHC-II+ ILC3	Atp5g3
Il17re	1.63137e-116	2.92414	0.142	0.019	2.9332e-112	MHC-II+ ILC3	Il17re
Nucb1	2.05382e-116	1.30856	0.3	0.131	3.69277e-112	MHC-II+ ILC3	Nucb1
Tusc3	2.08188e-116	1.76378	0.218	0.068	3.74323e-112	MHC-II+ ILC3	Tusc3
2025-03-02	2.65001e-116	1.21327	0.331	0.158	4.76472e-112	MHC-II+ ILC3	2025-03-02
Kpna1	3.10619e-116	1.28903	0.313	0.142	5.58494e-112	MHC-II+ ILC3	Kpna1
Larp7	4.28243e-116	1.53586	0.261	0.102	7.69981e-112	MHC-II+ ILC3	Larp7
BC031181	6.05487e-116	1.00497	0.447	0.267	1.08867e-111	MHC-II+ ILC3	BC031181
Hspa9	1.13741e-115	1.1069	0.353	0.176	2.04506e-111	MHC-II+ ILC3	Hspa9
Tgif1	1.34219e-115	0.857017	0.457	0.268	2.41325e-111	MHC-II+ ILC3	Tgif1
Gm20186	1.45365e-115	2.77882	0.167	0.036	2.61367e-111	MHC-II+ ILC3	Gm20186
Hnrnpc	1.52002e-115	0.622948	0.674	0.504	2.733e-111	MHC-II+ ILC3	Hnrnpc
Pebp1	1.11858e-114	0.854423	0.481	0.296	2.0112e-110	MHC-II+ ILC3	Pebp1
Cxcl10	1.43214e-114	2.14762	0.254	0.098	2.57498e-110	MHC-II+ ILC3	Cxcl10
Abcb1b	1.49191e-114	1.89976	0.22	0.073	2.68246e-110	MHC-II+ ILC3	Abcb1b
Hmgn3	1.88881e-114	0.762737	0.531	0.34	3.39608e-110	MHC-II+ ILC3	Hmgn3
Canx	8.0854e-114	0.683307	0.614	0.436	1.45376e-109	MHC-II+ ILC3	Canx
Nme1	9.67983e-114	1.05448	0.364	0.185	1.74043e-109	MHC-II+ ILC3	Nme1
Xist	2.3819e-113	0.486764	0.662	0.464	4.28265e-109	MHC-II+ ILC3	Xist
Arnt2	2.4105e-113	2.912	0.14	0.019	4.33407e-109	MHC-II+ ILC3	Arnt2
Ptger2	3.15599e-113	3.33348	0.13	0.014	5.67448e-109	MHC-II+ ILC3	Ptger2
Snu13	4.65874e-113	0.777804	0.54	0.359	8.37642e-109	MHC-II+ ILC3	Snu13
Ero1l	5.5972e-113	1.76781	0.215	0.068	1.00638e-108	MHC-II+ ILC3	Ero1l
Ubn1	5.74772e-113	1.12597	0.355	0.181	1.03344e-108	MHC-II+ ILC3	Ubn1
4930523C07Rik	1.13324e-112	0.757122	0.543	0.36	2.03756e-108	MHC-II+ ILC3	4930523C07Rik
Fermt3	1.1703e-112	0.963645	0.403	0.219	2.1042e-108	MHC-II+ ILC3	Fermt3
Pcna	5.72418e-112	0.779197	0.469	0.281	1.02921e-107	MHC-II+ ILC3	Pcna
Dph3	9.62759e-112	1.37425	0.296	0.134	1.73104e-107	MHC-II+ ILC3	Dph3
Ski	1.30764e-111	2.31413	0.159	0.032	2.35114e-107	MHC-II+ ILC3	Ski
Abi3bp	1.3802e-111	3.88866	0.119	0.009	2.4816e-107	MHC-II+ ILC3	Abi3bp
Lef1	1.60051e-111	2.73383	0.144	0.023	2.87771e-107	MHC-II+ ILC3	Lef1
Sms	2.47723e-111	1.18269	0.311	0.142	4.45406e-107	MHC-II+ ILC3	Sms
Cebpz	2.76882e-111	1.14453	0.323	0.152	4.97834e-107	MHC-II+ ILC3	Cebpz
Prkd2	6.38639e-111	1.8143	0.209	0.066	1.14827e-106	MHC-II+ ILC3	Prkd2
Impdh1	7.77182e-111	2.83042	0.14	0.021	1.39737e-106	MHC-II+ ILC3	Impdh1
G3bp2	1.03759e-110	0.993113	0.42	0.244	1.86558e-106	MHC-II+ ILC3	G3bp2
Las1l	1.07026e-110	1.60365	0.222	0.074	1.92433e-106	MHC-II+ ILC3	Las1l
Hmgb2	3.64909e-110	0.601816	0.519	0.342	6.56107e-106	MHC-II+ ILC3	Hmgb2
Ikzf3	4.49844e-110	3.17545	0.137	0.02	8.0882e-106	MHC-II+ ILC3	Ikzf3
Cd84	8.58305e-110	2.79456	0.14	0.022	1.54323e-105	MHC-II+ ILC3	Cd84
Dars2	8.76631e-110	2.11964	0.181	0.047	1.57618e-105	MHC-II+ ILC3	Dars2
Tagap	1.09748e-109	1.46003	0.219	0.072	1.97326e-105	MHC-II+ ILC3	Tagap
Unc45a	1.50421e-109	1.69608	0.216	0.071	2.70458e-105	MHC-II+ ILC3	Unc45a
Atp2a3	1.6532e-109	2.87508	0.136	0.019	2.97246e-105	MHC-II+ ILC3	Atp2a3
Srsf2	2.72394e-109	0.62819	0.647	0.476	4.89765e-105	MHC-II+ ILC3	Srsf2
Slc16a10	4.39882e-109	2.96253	0.148	0.027	7.90907e-105	MHC-II+ ILC3	Slc16a10
Atp5j	4.61607e-109	0.594621	0.689	0.525	8.29969e-105	MHC-II+ ILC3	Atp5j
Plcg2	5.2958e-109	1.06609	0.347	0.175	9.52184e-105	MHC-II+ ILC3	Plcg2
Ccdc88c	1.22929e-108	1.81562	0.203	0.063	2.21027e-104	MHC-II+ ILC3	Ccdc88c
Man1b1	1.32605e-108	1.418	0.279	0.122	2.38424e-104	MHC-II+ ILC3	Man1b1
Rps10	2.80024e-108	0.303681	0.977	0.953	5.03484e-104	MHC-II+ ILC3	Rps10
Stt3b	4.82081e-108	1.35148	0.272	0.115	8.66781e-104	MHC-II+ ILC3	Stt3b
Tm9sf3	9.56626e-108	0.896312	0.428	0.249	1.72001e-103	MHC-II+ ILC3	Tm9sf3
Eif4g3	1.22597e-107	1.34128	0.271	0.113	2.2043e-103	MHC-II+ ILC3	Eif4g3
Trp53i11	1.31463e-107	2.14635	0.162	0.036	2.3637e-103	MHC-II+ ILC3	Trp53i11
Rpl4	4.54375e-107	0.263826	0.991	0.958	8.16967e-103	MHC-II+ ILC3	Rpl4
Fam189b	7.03465e-107	2.73774	0.142	0.024	1.26483e-102	MHC-II+ ILC3	Fam189b
Ssbp2	8.13511e-107	1.89556	0.186	0.052	1.46269e-102	MHC-II+ ILC3	Ssbp2
Arrdc3	9.4327e-107	2.50237	0.158	0.034	1.696e-102	MHC-II+ ILC3	Arrdc3
Lats2	1.04686e-106	1.86976	0.194	0.058	1.88225e-102	MHC-II+ ILC3	Lats2
Ubald2	1.19046e-106	1.02723	0.453	0.282	2.14045e-102	MHC-II+ ILC3	Ubald2
Zdhhc18	1.66443e-106	1.23115	0.297	0.136	2.99264e-102	MHC-II+ ILC3	Zdhhc18
Lin54	1.77794e-106	1.81342	0.201	0.063	3.19674e-102	MHC-II+ ILC3	Lin54
Aak1	2.2831e-106	1.74207	0.193	0.057	4.10501e-102	MHC-II+ ILC3	Aak1
Vkorc1	2.31159e-106	1.73629	0.209	0.068	4.15624e-102	MHC-II+ ILC3	Vkorc1
Lgals9	5.89708e-106	1.9358	0.177	0.046	1.0603e-101	MHC-II+ ILC3	Lgals9
Aldh2	9.36709e-106	1.57771	0.229	0.084	1.6842e-101	MHC-II+ ILC3	Aldh2
Pdia3	1.27909e-105	0.569158	0.686	0.519	2.29981e-101	MHC-II+ ILC3	Pdia3
Fmnl1	1.45823e-105	0.886328	0.397	0.22	2.62189e-101	MHC-II+ ILC3	Fmnl1
Srxn1	1.63683e-105	1.62163	0.237	0.09	2.94303e-101	MHC-II+ ILC3	Srxn1
Arhgap18	3.94089e-105	1.82966	0.191	0.057	7.08573e-101	MHC-II+ ILC3	Arhgap18
Wdr83os	4.88937e-105	1.10703	0.349	0.183	8.79109e-101	MHC-II+ ILC3	Wdr83os
Mospd3	7.81221e-105	1.67437	0.212	0.071	1.40464e-100	MHC-II+ ILC3	Mospd3
Rps27a	4.09131e-104	0.207711	1	0.998	7.35618e-100	MHC-II+ ILC3	Rps27a
Sdcbp	4.54977e-104	0.855791	0.437	0.261	8.18049e-100	MHC-II+ ILC3	Sdcbp
Trir	5.04987e-104	0.814624	0.479	0.305	9.07967e-100	MHC-II+ ILC3	Trir
Hacd3	6.17854e-104	2.25309	0.16	0.037	1.1109e-99	MHC-II+ ILC3	Hacd3
Asphd2	6.29879e-104	3.48497	0.118	0.012	1.13252e-99	MHC-II+ ILC3	Asphd2
Abca2	8.80997e-104	1.89746	0.186	0.054	1.58403e-99	MHC-II+ ILC3	Abca2
Crlf3	1.67633e-103	1.06745	0.359	0.193	3.01404e-99	MHC-II+ ILC3	Crlf3
Ret	2.05894e-103	3.51232	0.117	0.012	3.70198e-99	MHC-II+ ILC3	Ret
Wac	2.08027e-103	0.956115	0.479	0.31	3.74032e-99	MHC-II+ ILC3	Wac
Ms4a6b	2.09165e-103	2.03099	0.161	0.037	3.76078e-99	MHC-II+ ILC3	Ms4a6b
Akna	2.96575e-103	0.918015	0.405	0.231	5.33242e-99	MHC-II+ ILC3	Akna
Mettl26	5.94789e-103	1.53594	0.228	0.084	1.06943e-98	MHC-II+ ILC3	Mettl26
Rhoh	6.3984e-103	2.45588	0.146	0.029	1.15043e-98	MHC-II+ ILC3	Rhoh
Fcgr3	1.06787e-102	2.97622	0.126	0.017	1.92003e-98	MHC-II+ ILC3	Fcgr3
Leprotl1	1.06953e-102	1.25317	0.307	0.15	1.92302e-98	MHC-II+ ILC3	Leprotl1
Atn1	1.35944e-102	1.95754	0.179	0.05	2.44427e-98	MHC-II+ ILC3	Atn1
Cbr1	3.85176e-102	2.47089	0.148	0.03	6.92546e-98	MHC-II+ ILC3	Cbr1
Sltm	3.9506e-102	0.47858	0.711	0.555	7.10318e-98	MHC-II+ ILC3	Sltm
Ppia	4.28244e-102	0.179648	1	0.999	7.69983e-98	MHC-II+ ILC3	Ppia
Pdlim7	4.562e-102	1.58608	0.216	0.076	8.20248e-98	MHC-II+ ILC3	Pdlim7
Prpf4b	2.34382e-101	0.7112	0.513	0.333	4.21419e-97	MHC-II+ ILC3	Prpf4b
Uhrf1bp1l	2.54897e-101	1.59018	0.213	0.074	4.58306e-97	MHC-II+ ILC3	Uhrf1bp1l
Ppp3ca	3.46231e-101	1.30292	0.25	0.1	6.22522e-97	MHC-II+ ILC3	Ppp3ca
Spcs1	4.45166e-101	0.750791	0.53	0.36	8.00408e-97	MHC-II+ ILC3	Spcs1
Ccr1	4.53358e-101	4.17112	0.109	0.008	8.15137e-97	MHC-II+ ILC3	Ccr1
Nup98	4.90461e-101	0.860881	0.427	0.254	8.8185e-97	MHC-II+ ILC3	Nup98
Stk26	8.64564e-101	3.17962	0.118	0.013	1.55449e-96	MHC-II+ ILC3	Stk26
Vipr2	9.91934e-101	3.85569	0.106	0.007	1.7835e-96	MHC-II+ ILC3	Vipr2
Tram1	1.38617e-100	1.1038	0.343	0.182	2.49233e-96	MHC-II+ ILC3	Tram1
Fkbp4	1.77393e-100	1.29356	0.272	0.12	3.18953e-96	MHC-II+ ILC3	Fkbp4
Ppp2ca	2.56486e-100	0.639674	0.617	0.448	4.61161e-96	MHC-II+ ILC3	Ppp2ca
Csnk1a1	6.40005e-100	0.681286	0.578	0.41	1.15073e-95	MHC-II+ ILC3	Csnk1a1
B3galt5	6.77125e-100	2.90333	0.128	0.02	1.21747e-95	MHC-II+ ILC3	B3galt5
Eif4a1	1.03796e-99	0.439289	0.804	0.674	1.86625e-95	MHC-II+ ILC3	Eif4a1
Rab2a	1.65841e-99	0.683177	0.569	0.402	2.98183e-95	MHC-II+ ILC3	Rab2a
Nop58	2.9186e-99	0.954865	0.341	0.174	5.24765e-95	MHC-II+ ILC3	Nop58
Tra2b	3.50978e-99	0.74068	0.517	0.347	6.31058e-95	MHC-II+ ILC3	Tra2b
Rwdd1	5.22458e-99	1.13557	0.343	0.183	9.39379e-95	MHC-II+ ILC3	Rwdd1
mt-Nd4l	1.65671e-98	0.611363	0.592	0.416	2.97876e-94	MHC-II+ ILC3	mt-Nd4l
Gadd45g	1.99173e-98	1.68497	0.233	0.093	3.58113e-94	MHC-II+ ILC3	Gadd45g
2025-09-06	2.12512e-98	1.16423	0.295	0.14	3.82097e-94	MHC-II+ ILC3	2025-09-06
Med31	2.15358e-98	2.0051	0.228	0.092	3.87214e-94	MHC-II+ ILC3	Med31
Slc9a3r1	2.3956e-98	0.982359	0.421	0.258	4.30729e-94	MHC-II+ ILC3	Slc9a3r1
Abt1	2.8641e-98	2.11489	0.191	0.062	5.14965e-94	MHC-II+ ILC3	Abt1
Rps6	1.18797e-97	0.215464	0.999	0.995	2.13598e-93	MHC-II+ ILC3	Rps6
Hdlbp	2.43416e-97	0.885877	0.436	0.27	4.37661e-93	MHC-II+ ILC3	Hdlbp
Iars2	2.45886e-97	1.55809	0.213	0.077	4.42104e-93	MHC-II+ ILC3	Iars2
Elovl1	4.21333e-97	1.21089	0.331	0.176	7.57556e-93	MHC-II+ ILC3	Elovl1
Nol10	4.69585e-97	2.04561	0.166	0.045	8.44315e-93	MHC-II+ ILC3	Nol10
Rarg	5.32935e-97	1.88658	0.186	0.059	9.58218e-93	MHC-II+ ILC3	Rarg
Mex3c	5.98804e-97	1.54818	0.229	0.09	1.07665e-92	MHC-II+ ILC3	Mex3c
Rnf145	6.15667e-97	1.68134	0.198	0.067	1.10697e-92	MHC-II+ ILC3	Rnf145
Hnrnpu	8.72288e-97	0.586414	0.637	0.47	1.56837e-92	MHC-II+ ILC3	Hnrnpu
Higd1a	1.62564e-96	1.05214	0.347	0.187	2.9229e-92	MHC-II+ ILC3	Higd1a
Acyp2	1.79206e-96	3.11949	0.118	0.015	3.22212e-92	MHC-II+ ILC3	Acyp2
Lingo4	1.92835e-96	3.15165	0.115	0.014	3.46717e-92	MHC-II+ ILC3	Lingo4
Metrnl	2.38226e-96	1.69433	0.215	0.081	4.2833e-92	MHC-II+ ILC3	Metrnl
Ube2d3	2.42348e-96	0.472803	0.797	0.7	4.35741e-92	MHC-II+ ILC3	Ube2d3
Gimap1	8.59125e-96	2.73922	0.131	0.024	1.54471e-91	MHC-II+ ILC3	Gimap1
Susd6	1.06787e-95	1.67493	0.19	0.062	1.92004e-91	MHC-II+ ILC3	Susd6
Med14	1.20754e-95	1.52263	0.225	0.088	2.17115e-91	MHC-II+ ILC3	Med14
Selenos	1.48907e-95	1.01697	0.358	0.199	2.67734e-91	MHC-II+ ILC3	Selenos
Sec11c	1.70404e-95	0.548515	0.675	0.513	3.06387e-91	MHC-II+ ILC3	Sec11c
Nfkbid	4.60227e-95	0.902825	0.348	0.184	8.27489e-91	MHC-II+ ILC3	Nfkbid
Rcn2	5.12915e-95	1.55516	0.214	0.08	9.22222e-91	MHC-II+ ILC3	Rcn2
Camk4	5.59161e-95	1.80902	0.159	0.041	1.00537e-90	MHC-II+ ILC3	Camk4
Cobll1	7.17155e-95	3.37275	0.109	0.011	1.28945e-90	MHC-II+ ILC3	Cobll1
Rnf166	7.32849e-95	1.2944	0.253	0.11	1.31766e-90	MHC-II+ ILC3	Rnf166
Qpct	1.94589e-94	3.09928	0.115	0.015	3.49872e-90	MHC-II+ ILC3	Qpct
Bud31	1.09513e-93	0.814669	0.446	0.28	1.96904e-89	MHC-II+ ILC3	Bud31
Prss2	1.10469e-93	3.8185	0.127	0.023	1.98622e-89	MHC-II+ ILC3	Prss2
Arl6ip5	1.26565e-93	0.973762	0.36	0.201	2.27564e-89	MHC-II+ ILC3	Arl6ip5
Ccnd2	1.58531e-93	0.565742	0.399	0.222	2.85039e-89	MHC-II+ ILC3	Ccnd2
Stk24	1.73207e-93	0.835826	0.414	0.249	3.11426e-89	MHC-II+ ILC3	Stk24
Cysltr2	2.0373e-93	3.69668	0.102	0.008	3.66307e-89	MHC-II+ ILC3	Cysltr2
Rpl34	2.79401e-93	0.220931	0.999	0.998	5.02363e-89	MHC-II+ ILC3	Rpl34
Gjb2	2.84911e-93	1.43464	0.205	0.073	5.1227e-89	MHC-II+ ILC3	Gjb2
Tnk2	9.09341e-93	2.33597	0.135	0.027	1.635e-88	MHC-II+ ILC3	Tnk2
Pdcd6ip	1.01617e-92	0.890384	0.405	0.244	1.82708e-88	MHC-II+ ILC3	Pdcd6ip
Plxdc2	1.05811e-92	2.35417	0.133	0.026	1.90249e-88	MHC-II+ ILC3	Plxdc2
Hnrnph1	1.88836e-92	0.66904	0.518	0.35	3.39526e-88	MHC-II+ ILC3	Hnrnph1
Cstb	2.21397e-92	1.20731	0.73	0.675	3.98072e-88	MHC-II+ ILC3	Cstb
Plaur	2.36983e-92	1.73154	0.176	0.054	4.26096e-88	MHC-II+ ILC3	Plaur
Muc1	2.77236e-92	2.3585	0.139	0.03	4.9847e-88	MHC-II+ ILC3	Muc1
Lrrc8b	3.18968e-92	2.20539	0.142	0.032	5.73505e-88	MHC-II+ ILC3	Lrrc8b
Thy1	3.64753e-92	2.50281	0.131	0.025	6.55825e-88	MHC-II+ ILC3	Thy1
Cox6a1	3.71181e-92	0.431855	0.814	0.714	6.67383e-88	MHC-II+ ILC3	Cox6a1
Smyd2	3.74177e-92	1.58282	0.198	0.07	6.7277e-88	MHC-II+ ILC3	Smyd2
Eif4ebp2	3.85772e-92	1.15768	0.296	0.148	6.93618e-88	MHC-II+ ILC3	Eif4ebp2
Cers4	3.93241e-92	2.89791	0.113	0.015	7.07047e-88	MHC-II+ ILC3	Cers4
Rara	5.67888e-92	1.41634	0.222	0.087	1.02106e-87	MHC-II+ ILC3	Rara
Dscam	8.49784e-92	0.897511	0.302	0.148	1.52791e-87	MHC-II+ ILC3	Dscam
2900026A02Rik	9.18892e-92	2.50474	0.126	0.022	1.65217e-87	MHC-II+ ILC3	2900026A02Rik
Gnb2	9.48842e-92	0.513073	0.68	0.527	1.70602e-87	MHC-II+ ILC3	Gnb2
Hspa4	1.04217e-91	0.776358	0.464	0.298	1.87383e-87	MHC-II+ ILC3	Hspa4
Gm44511	3.135e-91	1.08985	0.284	0.136	5.63674e-87	MHC-II+ ILC3	Gm44511
Ppm1h	8.38608e-91	1.43933	0.202	0.073	1.50782e-86	MHC-II+ ILC3	Ppm1h
Bsg	8.80398e-91	0.721732	0.493	0.329	1.58296e-86	MHC-II+ ILC3	Bsg
Dhrs3	1.00944e-90	1.44685	0.221	0.088	1.81497e-86	MHC-II+ ILC3	Dhrs3
Sf3b1	1.49178e-90	0.519961	0.743	0.617	2.68222e-86	MHC-II+ ILC3	Sf3b1
Romo1	2.5884e-90	0.797757	0.464	0.305	4.65394e-86	MHC-II+ ILC3	Romo1
Ndufa2	3.50798e-90	0.638551	0.585	0.43	6.30735e-86	MHC-II+ ILC3	Ndufa2
Ipcef1	5.33872e-90	3.10107	0.11	0.014	9.59902e-86	MHC-II+ ILC3	Ipcef1
Ywhab	7.36922e-90	0.66672	0.535	0.376	1.32499e-85	MHC-II+ ILC3	Ywhab
Pak2	7.4706e-90	0.692487	0.529	0.368	1.34321e-85	MHC-II+ ILC3	Pak2
Zhx2	1.61088e-89	1.20335	0.235	0.098	2.89637e-85	MHC-II+ ILC3	Zhx2
Sdc2	2.33634e-89	3.33752	0.105	0.012	4.20075e-85	MHC-II+ ILC3	Sdc2
Hspd1	3.74903e-89	0.732203	0.466	0.302	6.74076e-85	MHC-II+ ILC3	Hspd1
Lif	4.97549e-89	3.49313	0.101	0.01	8.94592e-85	MHC-II+ ILC3	Lif
Parvg	6.39931e-89	0.950274	0.292	0.14	1.1506e-84	MHC-II+ ILC3	Parvg
Arhgap4	7.21862e-89	1.60618	0.194	0.069	1.29791e-84	MHC-II+ ILC3	Arhgap4
Oga	9.30001e-89	0.99968	0.373	0.217	1.67214e-84	MHC-II+ ILC3	Oga
Clk1	1.0305e-88	0.514734	0.635	0.464	1.85284e-84	MHC-II+ ILC3	Clk1
Fus	1.62749e-88	0.577827	0.627	0.47	2.92622e-84	MHC-II+ ILC3	Fus
Thrap3	1.80538e-88	0.74248	0.475	0.314	3.24607e-84	MHC-II+ ILC3	Thrap3
Coro2b	1.83703e-88	3.85824	0.095	0.007	3.30299e-84	MHC-II+ ILC3	Coro2b
Synj2	3.57935e-88	2.48872	0.123	0.022	6.43566e-84	MHC-II+ ILC3	Synj2
Rsl1d1	4.5048e-88	0.924395	0.353	0.198	8.09962e-84	MHC-II+ ILC3	Rsl1d1
Bend4	6.52962e-88	1.66239	0.188	0.066	1.17403e-83	MHC-II+ ILC3	Bend4
Tespa1	1.25437e-87	2.47442	0.126	0.024	2.25535e-83	MHC-II+ ILC3	Tespa1
Polr2l	1.35763e-87	1.17157	0.278	0.135	2.44102e-83	MHC-II+ ILC3	Polr2l
Ndufs7	4.84449e-87	0.922047	0.384	0.23	8.7104e-83	MHC-II+ ILC3	Ndufs7
Anapc11	4.99784e-87	0.84953	0.428	0.274	8.98612e-83	MHC-II+ ILC3	Anapc11
Gabbr1	6.52183e-87	2.20777	0.136	0.031	1.17263e-82	MHC-II+ ILC3	Gabbr1
Stim1	7.45959e-87	1.36575	0.214	0.085	1.34123e-82	MHC-II+ ILC3	Stim1
Abcb1a	8.42308e-87	2.93874	0.11	0.015	1.51447e-82	MHC-II+ ILC3	Abcb1a
Sh2b1	1.15818e-86	1.69714	0.177	0.058	2.0824e-82	MHC-II+ ILC3	Sh2b1
Jak3	1.92176e-86	1.51386	0.193	0.07	3.45532e-82	MHC-II+ ILC3	Jak3
Bptf	2.5145e-86	0.836123	0.389	0.232	4.52106e-82	MHC-II+ ILC3	Bptf
Gimap9	2.89037e-86	3.15803	0.106	0.014	5.19689e-82	MHC-II+ ILC3	Gimap9
St6galnac6	7.86176e-86	1.62457	0.188	0.068	1.41355e-81	MHC-II+ ILC3	St6galnac6
Arhgap15	1.58255e-85	1.19621	0.242	0.107	2.84542e-81	MHC-II+ ILC3	Arhgap15
Son	2.42549e-85	0.427336	0.716	0.571	4.36102e-81	MHC-II+ ILC3	Son
Ttpal	4.60284e-85	1.91357	0.156	0.045	8.27591e-81	MHC-II+ ILC3	Ttpal
Arid5b	5.61618e-85	1.72711	0.161	0.048	1.00979e-80	MHC-II+ ILC3	Arid5b
Adgrg3	5.96202e-85	2.54811	0.116	0.02	1.07197e-80	MHC-II+ ILC3	Adgrg3
Uba1	1.1789e-84	0.795573	0.436	0.283	2.11966e-80	MHC-II+ ILC3	Uba1
Agpat4	1.4515e-84	1.43783	0.201	0.077	2.6098e-80	MHC-II+ ILC3	Agpat4
Dock2	1.99989e-84	0.610472	0.469	0.306	3.59581e-80	MHC-II+ ILC3	Dock2
Rpl10-ps3	3.43e-84	0.718639	0.47	0.312	6.16713e-80	MHC-II+ ILC3	Rpl10-ps3
Akr1b3	3.58467e-84	0.772819	0.379	0.221	6.44523e-80	MHC-II+ ILC3	Akr1b3
Crot	4.55601e-84	2.09163	0.142	0.037	8.1917e-80	MHC-II+ ILC3	Crot
Lgals3bp	5.3433e-84	1.24703	0.243	0.109	9.60725e-80	MHC-II+ ILC3	Lgals3bp
Mllt3	5.53927e-84	2.41574	0.12	0.023	9.9596e-80	MHC-II+ ILC3	Mllt3
Homer1	9.6863e-84	1.84687	0.163	0.051	1.7416e-79	MHC-II+ ILC3	Homer1
Mfng	1.25584e-83	2.31193	0.127	0.028	2.258e-79	MHC-II+ ILC3	Mfng
Tnrc6b	1.26414e-83	0.857263	0.343	0.19	2.27293e-79	MHC-II+ ILC3	Tnrc6b
Atf6	1.45694e-83	1.27984	0.238	0.106	2.61957e-79	MHC-II+ ILC3	Atf6
Glul	2.92171e-83	1.59598	0.222	0.096	5.25324e-79	MHC-II+ ILC3	Glul
Chst11	3.90971e-83	1.11728	0.224	0.093	7.02965e-79	MHC-II+ ILC3	Chst11
Rpl35	4.31918e-83	0.281753	0.979	0.96	7.76589e-79	MHC-II+ ILC3	Rpl35
Capn3	7.75849e-83	3.32076	0.098	0.011	1.39498e-78	MHC-II+ ILC3	Capn3
St3gal6	1.25029e-82	3.13298	0.1	0.012	2.24803e-78	MHC-II+ ILC3	St3gal6
Tnfsf12	1.39387e-82	2.9879	0.1	0.012	2.50618e-78	MHC-II+ ILC3	Tnfsf12
Lck	3.21645e-82	2.44266	0.114	0.02	5.78318e-78	MHC-II+ ILC3	Lck
Bambi	2.90759e-81	1.75397	0.173	0.06	5.22784e-77	MHC-II+ ILC3	Bambi
Neil1	3.11027e-81	2.50219	0.12	0.025	5.59226e-77	MHC-II+ ILC3	Neil1
Il16	3.54338e-81	2.18624	0.131	0.031	6.37101e-77	MHC-II+ ILC3	Il16
Sestd1	3.70022e-81	1.94148	0.146	0.041	6.65299e-77	MHC-II+ ILC3	Sestd1
Arf1	4.75899e-81	0.486123	0.702	0.571	8.55666e-77	MHC-II+ ILC3	Arf1
Impg1	5.62863e-81	3.50025	0.092	0.009	1.01203e-76	MHC-II+ ILC3	Impg1
Raly	6.69242e-81	0.58473	0.563	0.409	1.2033e-76	MHC-II+ ILC3	Raly
Sf3b4	8.04667e-81	0.828129	0.384	0.235	1.44679e-76	MHC-II+ ILC3	Sf3b4
Rheb	8.19219e-81	0.792108	0.439	0.289	1.47295e-76	MHC-II+ ILC3	Rheb
Eef1g	1.06605e-80	0.40595	0.758	0.619	1.91676e-76	MHC-II+ ILC3	Eef1g
Drap1	1.62247e-80	0.889641	0.363	0.216	2.9172e-76	MHC-II+ ILC3	Drap1
Dipk2a	1.74184e-80	2.20829	0.132	0.032	3.13183e-76	MHC-II+ ILC3	Dipk2a
Sar1a	1.96913e-80	0.786017	0.424	0.274	3.5405e-76	MHC-II+ ILC3	Sar1a
P4hb	2.61102e-80	0.803181	0.4	0.249	4.69461e-76	MHC-II+ ILC3	P4hb
Tprgl	2.78311e-80	0.826878	0.403	0.255	5.00403e-76	MHC-II+ ILC3	Tprgl
Pkp4	2.88239e-80	2.29372	0.121	0.025	5.18253e-76	MHC-II+ ILC3	Pkp4
Serbp1	3.21797e-80	0.462412	0.728	0.594	5.78591e-76	MHC-II+ ILC3	Serbp1
Ikbke	3.79319e-80	2.55528	0.107	0.017	6.82015e-76	MHC-II+ ILC3	Ikbke
Cfap36	4.61524e-80	1.25209	0.243	0.114	8.29819e-76	MHC-II+ ILC3	Cfap36
Rpl27a	4.99429e-80	0.176032	1	0.998	8.97973e-76	MHC-II+ ILC3	Rpl27a
Ctnnb1	6.26694e-80	0.945572	0.352	0.207	1.1268e-75	MHC-II+ ILC3	Ctnnb1
Smc1a	7.43779e-80	0.880941	0.351	0.204	1.33731e-75	MHC-II+ ILC3	Smc1a
Pdcd1lg2	8.24321e-80	1.41037	0.205	0.084	1.48213e-75	MHC-II+ ILC3	Pdcd1lg2
Rnf187	1.37612e-79	0.801961	0.377	0.228	2.47427e-75	MHC-II+ ILC3	Rnf187
Scamp3	1.46744e-79	1.19932	0.247	0.117	2.63845e-75	MHC-II+ ILC3	Scamp3
Zcchc18	3.42228e-79	3.52436	0.09	0.008	6.15326e-75	MHC-II+ ILC3	Zcchc18
4932438A13Rik	4.34287e-79	1.11792	0.257	0.123	7.80848e-75	MHC-II+ ILC3	4932438A13Rik
Irf2bpl	8.88315e-79	3.31689	0.093	0.01	1.59719e-74	MHC-II+ ILC3	Irf2bpl
Prkch	1.03973e-78	1.97867	0.132	0.033	1.86943e-74	MHC-II+ ILC3	Prkch
Cdip1	1.11201e-78	1.16065	0.249	0.119	1.99939e-74	MHC-II+ ILC3	Cdip1
Rnf10	2.25335e-78	0.788287	0.392	0.242	4.05152e-74	MHC-II+ ILC3	Rnf10
Usp2	2.7969e-78	2.4046	0.115	0.023	5.02882e-74	MHC-II+ ILC3	Usp2
Nop56	4.05354e-78	0.82504	0.35	0.203	7.28827e-74	MHC-II+ ILC3	Nop56
Tiam2	4.42173e-78	3.20258	0.094	0.011	7.95028e-74	MHC-II+ ILC3	Tiam2
Rnase4	5.33127e-78	3.06035	0.088	0.008	9.58562e-74	MHC-II+ ILC3	Rnase4
Ddx39b	6.75622e-78	0.664299	0.462	0.309	1.21477e-73	MHC-II+ ILC3	Ddx39b
Trp53	7.25932e-78	0.900711	0.339	0.196	1.30523e-73	MHC-II+ ILC3	Trp53
Ddx24	9.34006e-78	0.863424	0.379	0.235	1.67934e-73	MHC-II+ ILC3	Ddx24
Gm26740	1.03303e-77	2.16551	0.131	0.033	1.85739e-73	MHC-II+ ILC3	Gm26740
Rtn4rl1	2.14396e-77	2.55316	0.106	0.018	3.85484e-73	MHC-II+ ILC3	Rtn4rl1
Ociad1	2.20746e-77	0.644838	0.504	0.353	3.96901e-73	MHC-II+ ILC3	Ociad1
Colgalt2	3.65916e-77	4.05557	0.082	0.005	6.57916e-73	MHC-II+ ILC3	Colgalt2
Etfb	4.00203e-77	1.00193	0.296	0.159	7.19565e-73	MHC-II+ ILC3	Etfb
Slk	4.76012e-77	0.868027	0.368	0.224	8.5587e-73	MHC-II+ ILC3	Slk
Cetn2	8.12392e-77	1.23356	0.231	0.107	1.46068e-72	MHC-II+ ILC3	Cetn2
Hprt	8.16512e-77	0.942115	0.319	0.179	1.46809e-72	MHC-II+ ILC3	Hprt
Zfp326	1.10112e-76	1.14081	0.257	0.128	1.97982e-72	MHC-II+ ILC3	Zfp326
S1pr3	1.14315e-76	1.96098	0.13	0.033	2.05538e-72	MHC-II+ ILC3	S1pr3
Tcf25	1.53458e-76	0.637028	0.512	0.364	2.75918e-72	MHC-II+ ILC3	Tcf25
Ikzf2	1.57866e-76	2.65727	0.1	0.015	2.83844e-72	MHC-II+ ILC3	Ikzf2
Chpf	1.6155e-76	2.32566	0.116	0.025	2.90466e-72	MHC-II+ ILC3	Chpf
Card19	1.78882e-76	1.23761	0.232	0.108	3.2163e-72	MHC-II+ ILC3	Card19
Pou2af1	2.75755e-76	2.36851	0.121	0.028	4.95808e-72	MHC-II+ ILC3	Pou2af1
Emc10	2.87125e-76	1.00812	0.295	0.16	5.1625e-72	MHC-II+ ILC3	Emc10
Rbbp4	2.87492e-76	0.553738	0.581	0.432	5.16911e-72	MHC-II+ ILC3	Rbbp4
Mgat4a	3.82893e-76	1.31748	0.192	0.076	6.88442e-72	MHC-II+ ILC3	Mgat4a
Fdx1	1.0214e-75	1.15588	0.262	0.133	1.83648e-71	MHC-II+ ILC3	Fdx1
Eif4a3	1.20647e-75	0.688055	0.456	0.306	2.16924e-71	MHC-II+ ILC3	Eif4a3
Cyfip2	1.28401e-75	0.779806	0.382	0.235	2.30866e-71	MHC-II+ ILC3	Cyfip2
Hexim1	1.88566e-75	0.84834	0.335	0.192	3.39042e-71	MHC-II+ ILC3	Hexim1
Irf2bp2	2.25611e-75	1.2687	0.215	0.095	4.05649e-71	MHC-II+ ILC3	Irf2bp2
Tut7	2.33453e-75	0.846361	0.358	0.215	4.19749e-71	MHC-II+ ILC3	Tut7
Cysltr1	3.22934e-75	3.36651	0.09	0.01	5.80635e-71	MHC-II+ ILC3	Cysltr1
Stn1	3.32349e-75	1.94308	0.143	0.043	5.97564e-71	MHC-II+ ILC3	Stn1
Mrpl23	4.11757e-75	0.932931	0.332	0.193	7.40339e-71	MHC-II+ ILC3	Mrpl23
Ndufb7	7.94359e-75	0.648995	0.499	0.352	1.42826e-70	MHC-II+ ILC3	Ndufb7
Rps7	8.8699e-75	0.179092	0.999	0.996	1.59481e-70	MHC-II+ ILC3	Rps7
Cope	8.91064e-75	0.67331	0.503	0.359	1.60213e-70	MHC-II+ ILC3	Cope
Sidt2	1.32953e-74	1.11212	0.26	0.132	2.39049e-70	MHC-II+ ILC3	Sidt2
Igfbp4	1.34329e-74	2.33393	0.12	0.028	2.41523e-70	MHC-II+ ILC3	Igfbp4
Mtmr12	2.13586e-74	1.07666	0.27	0.14	3.84027e-70	MHC-II+ ILC3	Mtmr12
Ppib	3.94067e-74	0.494268	0.669	0.536	7.08533e-70	MHC-II+ ILC3	Ppib
Ddit4	4.33311e-74	1.66079	0.177	0.068	7.79093e-70	MHC-II+ ILC3	Ddit4
Adipor2	8.2644e-74	0.897118	0.328	0.19	1.48594e-69	MHC-II+ ILC3	Adipor2
Apol7b	9.10905e-74	3.42881	0.085	0.008	1.63781e-69	MHC-II+ ILC3	Apol7b
Srp9	9.74043e-74	0.775468	0.402	0.258	1.75133e-69	MHC-II+ ILC3	Srp9
Golph3	1.50254e-73	0.888204	0.322	0.184	2.70157e-69	MHC-II+ ILC3	Golph3
Acyp1	1.87888e-73	2.52774	0.105	0.02	3.37822e-69	MHC-II+ ILC3	Acyp1
Gnl3	2.95046e-73	1.10898	0.234	0.111	5.30493e-69	MHC-II+ ILC3	Gnl3
Dpm3	4.88937e-73	1.21905	0.229	0.109	8.79108e-69	MHC-II+ ILC3	Dpm3
Nrip1	7.84471e-73	0.896555	0.328	0.19	1.41048e-68	MHC-II+ ILC3	Nrip1
Rapgef6	8.08549e-73	0.765643	0.337	0.196	1.45377e-68	MHC-II+ ILC3	Rapgef6
Tspan4	1.29982e-72	2.62345	0.097	0.015	2.33707e-68	MHC-II+ ILC3	Tspan4
Rcor1	1.68622e-72	1.21182	0.224	0.103	3.03182e-68	MHC-II+ ILC3	Rcor1
Anxa1	2.13542e-72	1.00561	0.172	0.062	3.83949e-68	MHC-II+ ILC3	Anxa1
Osbpl9	2.82429e-72	1.22196	0.265	0.14	5.07807e-68	MHC-II+ ILC3	Osbpl9
Bysl	2.88804e-72	2.23855	0.122	0.031	5.19269e-68	MHC-II+ ILC3	Bysl
Ctla2a	3.43021e-72	3.51611	0.087	0.01	6.16752e-68	MHC-II+ ILC3	Ctla2a
Chchd7	4.70716e-72	1.18911	0.222	0.103	8.46347e-68	MHC-II+ ILC3	Chchd7
Appl2	4.8813e-72	1.47798	0.175	0.067	8.77658e-68	MHC-II+ ILC3	Appl2
Ddx10	9.95928e-72	1.53811	0.169	0.063	1.79068e-67	MHC-II+ ILC3	Ddx10
Adgre5	1.15453e-71	0.620525	0.408	0.258	2.07585e-67	MHC-II+ ILC3	Adgre5
Fam216a	1.49553e-71	1.83501	0.138	0.041	2.68896e-67	MHC-II+ ILC3	Fam216a
Ubtf	2.1895e-71	0.944226	0.318	0.185	3.93673e-67	MHC-II+ ILC3	Ubtf
Glb1	2.2114e-71	1.42665	0.189	0.078	3.9761e-67	MHC-II+ ILC3	Glb1
Dgat2	2.70641e-71	2.48702	0.129	0.037	4.86613e-67	MHC-II+ ILC3	Dgat2
Gas7	2.91049e-71	2.74341	0.092	0.013	5.23307e-67	MHC-II+ ILC3	Gas7
Ddost	3.14951e-71	0.759867	0.416	0.277	5.66281e-67	MHC-II+ ILC3	Ddost
Mia3	3.55534e-71	0.907882	0.322	0.188	6.39249e-67	MHC-II+ ILC3	Mia3
Ddrgk1	3.77935e-71	0.984179	0.282	0.153	6.79528e-67	MHC-II+ ILC3	Ddrgk1
Aqp3	6.89732e-71	4.06308	0.075	0.005	1.24014e-66	MHC-II+ ILC3	Aqp3
Arrb1	9.20093e-71	2.15021	0.112	0.025	1.65433e-66	MHC-II+ ILC3	Arrb1
Gpr18	1.00462e-70	1.76764	0.14	0.044	1.8063e-66	MHC-II+ ILC3	Gpr18
Ctsw	1.40033e-70	2.10785	0.124	0.033	2.51779e-66	MHC-II+ ILC3	Ctsw
Elob	1.63364e-70	0.417888	0.751	0.643	2.93728e-66	MHC-II+ ILC3	Elob
Selenot	2.03418e-70	0.817299	0.368	0.231	3.65746e-66	MHC-II+ ILC3	Selenot
Hps4	2.10538e-70	1.26744	0.206	0.092	3.78548e-66	MHC-II+ ILC3	Hps4
Pnpla7	3.44591e-70	1.05348	0.254	0.13	6.19574e-66	MHC-II+ ILC3	Pnpla7
Rps28	3.67195e-70	0.228415	0.982	0.969	6.60216e-66	MHC-II+ ILC3	Rps28
Dkkl1	3.99325e-70	0.989067	0.168	0.061	7.17986e-66	MHC-II+ ILC3	Dkkl1
Hsd17b10	5.48754e-70	1.30182	0.204	0.091	9.8666e-66	MHC-II+ ILC3	Hsd17b10
Heph	6.34274e-70	0.526824	0.589	0.452	1.14042e-65	MHC-II+ ILC3	Heph
Cdc45	6.66151e-70	2.35562	0.108	0.024	1.19774e-65	MHC-II+ ILC3	Cdc45
Gucy1a1	8.26441e-70	3.64779	0.079	0.007	1.48594e-65	MHC-II+ ILC3	Gucy1a1
Mtap	1.14345e-69	2.10344	0.119	0.03	2.05592e-65	MHC-II+ ILC3	Mtap
Cox7b	1.23012e-69	0.498912	0.616	0.475	2.21175e-65	MHC-II+ ILC3	Cox7b
Ddc	1.2577e-69	4.62137	0.072	0.003	2.26134e-65	MHC-II+ ILC3	Ddc
Arap3	1.86577e-69	3.27404	0.081	0.008	3.35465e-65	MHC-II+ ILC3	Arap3
Plgrkt	4.83492e-69	0.703878	0.41	0.27	8.69318e-65	MHC-II+ ILC3	Plgrkt
Sdc1	5.59305e-69	2.5105	0.098	0.018	1.00563e-64	MHC-II+ ILC3	Sdc1
Ift20	6.86145e-69	1.10795	0.239	0.12	1.23369e-64	MHC-II+ ILC3	Ift20
Ddx58	7.32374e-69	1.63455	0.143	0.047	1.31681e-64	MHC-II+ ILC3	Ddx58
Ikzf1	2.04252e-68	0.854193	0.287	0.156	3.67245e-64	MHC-II+ ILC3	Ikzf1
Zfp703	2.11524e-68	1.5391	0.185	0.078	3.80321e-64	MHC-II+ ILC3	Zfp703
Cd200r1	3.09573e-68	3.6508	0.077	0.007	5.56612e-64	MHC-II+ ILC3	Cd200r1
Pik3cd	3.61793e-68	1.18846	0.191	0.081	6.50504e-64	MHC-II+ ILC3	Pik3cd
Phf1	4.63075e-68	1.3722	0.171	0.067	8.32608e-64	MHC-II+ ILC3	Phf1
Uqcrb	6.91788e-68	0.526957	0.583	0.446	1.24383e-63	MHC-II+ ILC3	Uqcrb
Scn5a	8.07902e-68	4.35992	0.071	0.004	1.45261e-63	MHC-II+ ILC3	Scn5a
Mast4	9.79833e-68	1.69174	0.131	0.039	1.76174e-63	MHC-II+ ILC3	Mast4
Dennd1c	1.16016e-67	1.14506	0.218	0.103	2.08597e-63	MHC-II+ ILC3	Dennd1c
Sertad1	1.81992e-67	1.11436	0.234	0.116	3.27222e-63	MHC-II+ ILC3	Sertad1
Dctn1	1.98322e-67	0.86062	0.338	0.207	3.56583e-63	MHC-II+ ILC3	Dctn1
Atp10a	2.23688e-67	2.90981	0.084	0.011	4.02191e-63	MHC-II+ ILC3	Atp10a
Rps12	2.44708e-67	0.165512	0.998	0.989	4.39985e-63	MHC-II+ ILC3	Rps12
Eef1d	3.5425e-67	0.576255	0.521	0.379	6.36941e-63	MHC-II+ ILC3	Eef1d
Ppt2	3.97817e-67	1.43138	0.161	0.061	7.15275e-63	MHC-II+ ILC3	Ppt2
Txnl1	5.15718e-67	0.791149	0.468	0.338	9.27261e-63	MHC-II+ ILC3	Txnl1
Hadhb	5.6533e-67	0.947805	0.277	0.152	1.01646e-62	MHC-II+ ILC3	Hadhb
Prrt1	7.31662e-67	3.61492	0.075	0.007	1.31553e-62	MHC-II+ ILC3	Prrt1
Cbx6	8.53647e-67	2.1323	0.106	0.024	1.53486e-62	MHC-II+ ILC3	Cbx6
Srsf7	1.6403e-66	0.433195	0.667	0.537	2.94926e-62	MHC-II+ ILC3	Srsf7
Nr1d2	1.9804e-66	1.85136	0.124	0.036	3.56077e-62	MHC-II+ ILC3	Nr1d2
Rab27a	2.68229e-66	1.18448	0.203	0.092	4.82275e-62	MHC-II+ ILC3	Rab27a
Carnmt1	3.83418e-66	1.49422	0.174	0.071	6.89386e-62	MHC-II+ ILC3	Carnmt1
Gatad2a	5.20052e-66	1.05346	0.249	0.13	9.35053e-62	MHC-II+ ILC3	Gatad2a
Plod2	5.66462e-66	3.04354	0.085	0.012	1.0185e-61	MHC-II+ ILC3	Plod2
Ppig	1.1353e-65	0.824898	0.361	0.23	2.04127e-61	MHC-II+ ILC3	Ppig
Ppm1g	1.25697e-65	0.943501	0.324	0.198	2.26003e-61	MHC-II+ ILC3	Ppm1g
Unc119	1.41653e-65	1.45779	0.148	0.052	2.54692e-61	MHC-II+ ILC3	Unc119
Phf6	1.51754e-65	1.50877	0.225	0.114	2.72854e-61	MHC-II+ ILC3	Phf6
Olfr1033	2.48112e-65	1.74832	0.131	0.041	4.46106e-61	MHC-II+ ILC3	Olfr1033
Runx3	3.01638e-65	0.592991	0.413	0.267	5.42346e-61	MHC-II+ ILC3	Runx3
Bag1	3.15706e-65	0.786862	0.359	0.226	5.6764e-61	MHC-II+ ILC3	Bag1
Myo1e	3.74166e-65	1.19766	0.182	0.076	6.72751e-61	MHC-II+ ILC3	Myo1e
Nipbl	5.84808e-65	0.618383	0.44	0.298	1.05149e-60	MHC-II+ ILC3	Nipbl
Ssbp4	7.29755e-65	1.43351	0.168	0.068	1.3121e-60	MHC-II+ ILC3	Ssbp4
Tmed2	7.3049e-65	0.637385	0.445	0.307	1.31342e-60	MHC-II+ ILC3	Tmed2
Cox7a2	7.94455e-65	0.455583	0.686	0.572	1.42843e-60	MHC-II+ ILC3	Cox7a2
Calu	9.37356e-65	1.35694	0.169	0.068	1.68537e-60	MHC-II+ ILC3	Calu
Cebpd	9.45309e-65	1.82988	0.149	0.054	1.69967e-60	MHC-II+ ILC3	Cebpd
Sf1	9.51387e-65	0.549298	0.502	0.364	1.71059e-60	MHC-II+ ILC3	Sf1
Erbin	9.91968e-65	0.769887	0.357	0.225	1.78356e-60	MHC-II+ ILC3	Erbin
Hspa8	1.89078e-64	0.193246	0.995	0.99	3.39961e-60	MHC-II+ ILC3	Hspa8
U2af1	2.60296e-64	0.665314	0.419	0.282	4.68012e-60	MHC-II+ ILC3	U2af1
Tcrg-C4	5.15317e-64	3.80523	0.073	0.007	9.2654e-60	MHC-II+ ILC3	Tcrg-C4
Lilrb4a	9.54986e-64	1.67974	0.129	0.041	1.71707e-59	MHC-II+ ILC3	Lilrb4a
Abcf1	1.11131e-63	0.774238	0.346	0.216	1.99814e-59	MHC-II+ ILC3	Abcf1
Slc7a1	1.12868e-63	1.41559	0.159	0.062	2.02936e-59	MHC-II+ ILC3	Slc7a1
Ctsf	1.23187e-63	2.98086	0.079	0.01	2.21491e-59	MHC-II+ ILC3	Ctsf
St6galnac3	1.66087e-63	1.5751	0.134	0.044	2.98625e-59	MHC-II+ ILC3	St6galnac3
Prrc2a	1.70104e-63	0.685127	0.393	0.258	3.05847e-59	MHC-II+ ILC3	Prrc2a
Crim1	2.14587e-63	2.74074	0.082	0.012	3.85827e-59	MHC-II+ ILC3	Crim1
Ss18	2.56469e-63	1.05663	0.239	0.124	4.6113e-59	MHC-II+ ILC3	Ss18
Ccdc189	2.76808e-63	2.32643	0.099	0.022	4.97701e-59	MHC-II+ ILC3	Ccdc189
Clic1	3.8778e-63	0.405623	0.724	0.616	6.97228e-59	MHC-II+ ILC3	Clic1
Ostc	4.84228e-63	0.725842	0.354	0.222	8.70641e-59	MHC-II+ ILC3	Ostc
Mpzl1	8.94811e-63	2.1	0.11	0.029	1.60887e-58	MHC-II+ ILC3	Mpzl1
Gch1	1.25145e-62	0.75166	0.311	0.182	2.2501e-58	MHC-II+ ILC3	Gch1
Atp5o.1	1.42103e-62	0.51033	0.538	0.4	2.55501e-58	MHC-II+ ILC3	Atp5o.1
Hip1r	1.60385e-62	1.64966	0.129	0.042	2.88372e-58	MHC-II+ ILC3	Hip1r
Ybx3	2.08967e-62	0.766522	0.299	0.172	3.75724e-58	MHC-II+ ILC3	Ybx3
Tmem173	2.72994e-62	0.804745	0.358	0.23	4.90844e-58	MHC-II+ ILC3	Tmem173
Rnf167	3.39938e-62	1.00901	0.238	0.124	6.11208e-58	MHC-II+ ILC3	Rnf167
Spryd4	3.75955e-62	2.6684	0.085	0.014	6.75967e-58	MHC-II+ ILC3	Spryd4
Rps20	5.9071e-62	0.153548	0.999	0.995	1.0621e-57	MHC-II+ ILC3	Rps20
Tubb6	1.00081e-61	0.879751	0.326	0.201	1.79946e-57	MHC-II+ ILC3	Tubb6
Mapk14	1.08312e-61	0.9697	0.224	0.112	1.94744e-57	MHC-II+ ILC3	Mapk14
Cage1	1.13926e-61	2.96153	0.08	0.012	2.04839e-57	MHC-II+ ILC3	Cage1
Samd11	1.50619e-61	3.06348	0.076	0.009	2.70812e-57	MHC-II+ ILC3	Samd11
Chd3	1.70881e-61	0.655003	0.348	0.215	3.07244e-57	MHC-II+ ILC3	Chd3
Lpcat3	1.93683e-61	1.59039	0.137	0.047	3.48242e-57	MHC-II+ ILC3	Lpcat3
Tmem154	2.03186e-61	1.87576	0.113	0.031	3.65328e-57	MHC-II+ ILC3	Tmem154
Cnst	2.10696e-61	2.06825	0.103	0.025	3.78832e-57	MHC-II+ ILC3	Cnst
Rbpms2	3.1803e-61	3.3615	0.071	0.007	5.71819e-57	MHC-II+ ILC3	Rbpms2
Unc119b	6.10449e-61	1.84471	0.117	0.035	1.09759e-56	MHC-II+ ILC3	Unc119b
Arhgef26	6.38623e-61	3.57505	0.068	0.005	1.14824e-56	MHC-II+ ILC3	Arhgef26
Fam167a	6.9891e-61	2.0852	0.104	0.026	1.25664e-56	MHC-II+ ILC3	Fam167a
Mmgt2	7.80797e-61	2.14699	0.1	0.024	1.40387e-56	MHC-II+ ILC3	Mmgt2
Mgat2	8.157e-61	0.862353	0.312	0.191	1.46663e-56	MHC-II+ ILC3	Mgat2
Mef2d	1.20165e-60	1.04047	0.219	0.109	2.16056e-56	MHC-II+ ILC3	Mef2d
F2rl2	1.32925e-60	4.25043	0.064	0.003	2.38998e-56	MHC-II+ ILC3	F2rl2
Snx9	1.69173e-60	1.20041	0.199	0.095	3.04173e-56	MHC-II+ ILC3	Snx9
Cd226	1.74688e-60	2.76158	0.081	0.013	3.14088e-56	MHC-II+ ILC3	Cd226
Cct7	1.93755e-60	0.602987	0.455	0.323	3.48372e-56	MHC-II+ ILC3	Cct7
Hspa2	2.48623e-60	1.1041	0.201	0.096	4.47024e-56	MHC-II+ ILC3	Hspa2
Dhrs11	2.48838e-60	1.99437	0.108	0.029	4.47411e-56	MHC-II+ ILC3	Dhrs11
Clcf1	3.10244e-60	1.62422	0.127	0.041	5.57819e-56	MHC-II+ ILC3	Clcf1
Pttg1	3.63248e-60	1.05353	0.221	0.112	6.5312e-56	MHC-II+ ILC3	Pttg1
Rps23	4.04291e-60	0.13536	1	0.999	7.26914e-56	MHC-II+ ILC3	Rps23
Micos10	7.01446e-60	0.508933	0.541	0.409	1.2612e-55	MHC-II+ ILC3	Micos10
Galnt1	7.09202e-60	0.653432	0.429	0.3	1.27515e-55	MHC-II+ ILC3	Galnt1
Nfe2l2	8.8054e-60	0.353107	0.434	0.285	1.58321e-55	MHC-II+ ILC3	Nfe2l2
Pdhb	9.54337e-60	0.828679	0.297	0.176	1.7159e-55	MHC-II+ ILC3	Pdhb
Bzw1	1.12352e-59	0.445653	0.536	0.403	2.02008e-55	MHC-II+ ILC3	Bzw1
Klf7	1.14261e-59	1.4698	0.154	0.061	2.05442e-55	MHC-II+ ILC3	Klf7
Pdha1	1.38899e-59	1.19539	0.199	0.095	2.4974e-55	MHC-II+ ILC3	Pdha1
2610035D17Rik	1.67293e-59	1.93896	0.103	0.026	3.00792e-55	MHC-II+ ILC3	2610035D17Rik
Uba52	1.68064e-59	0.19058	0.992	0.979	3.02179e-55	MHC-II+ ILC3	Uba52
Cd52	2.05472e-59	0.374455	0.927	0.883	3.69439e-55	MHC-II+ ILC3	Cd52
Exosc3	2.08756e-59	1.12716	0.208	0.103	3.75343e-55	MHC-II+ ILC3	Exosc3
Ttc28	2.59177e-59	1.98352	0.099	0.024	4.66001e-55	MHC-II+ ILC3	Ttc28
Tax1bp1	3.01094e-59	0.472387	0.615	0.49	5.41367e-55	MHC-II+ ILC3	Tax1bp1
Padi2	3.73156e-59	2.63641	0.082	0.014	6.70934e-55	MHC-II+ ILC3	Padi2
Hnrnph2	4.21369e-59	0.808216	0.319	0.198	7.57621e-55	MHC-II+ ILC3	Hnrnph2
Taf4b	5.94436e-59	2.08087	0.116	0.036	1.0688e-54	MHC-II+ ILC3	Taf4b
Man2a2	6.81839e-59	2.09999	0.099	0.024	1.22595e-54	MHC-II+ ILC3	Man2a2
Slc1a5	6.94211e-59	0.76133	0.314	0.191	1.24819e-54	MHC-II+ ILC3	Slc1a5
Lrp10	7.44811e-59	0.824419	0.331	0.211	1.33917e-54	MHC-II+ ILC3	Lrp10
Fnbp1	7.53807e-59	0.292045	0.657	0.506	1.35535e-54	MHC-II+ ILC3	Fnbp1
Ndufs3	8.04859e-59	0.83882	0.301	0.181	1.44714e-54	MHC-II+ ILC3	Ndufs3
Polr2f	1.76798e-58	0.921196	0.252	0.139	3.17882e-54	MHC-II+ ILC3	Polr2f
Tuba8	1.95169e-58	4.44975	0.059	0.002	3.50915e-54	MHC-II+ ILC3	Tuba8
Kras	2.18041e-58	0.82754	0.322	0.202	3.92038e-54	MHC-II+ ILC3	Kras
Sdhc	2.77247e-58	0.986589	0.244	0.133	4.9849e-54	MHC-II+ ILC3	Sdhc
Atp2b4	3.20511e-58	1.50559	0.14	0.052	5.76279e-54	MHC-II+ ILC3	Atp2b4
Plekha2	4.44668e-58	0.86296	0.307	0.189	7.99513e-54	MHC-II+ ILC3	Plekha2
Ramp3	4.73787e-58	0.918383	0.36	0.242	8.5187e-54	MHC-II+ ILC3	Ramp3
B9d2	5.50385e-58	1.1452	0.209	0.105	9.89591e-54	MHC-II+ ILC3	B9d2
Ankrd39	8.93306e-58	1.87696	0.111	0.032	1.60616e-53	MHC-II+ ILC3	Ankrd39
Sgf29	1.03282e-57	1.68287	0.123	0.041	1.85702e-53	MHC-II+ ILC3	Sgf29
Atp5j2	1.28295e-57	0.433051	0.652	0.538	2.30674e-53	MHC-II+ ILC3	Atp5j2
Snrpf	1.29136e-57	0.536435	0.484	0.35	2.32186e-53	MHC-II+ ILC3	Snrpf
Sh2d2a	1.37956e-57	3.12821	0.07	0.008	2.48044e-53	MHC-II+ ILC3	Sh2d2a
Arl2bp	2.02692e-57	0.975329	0.238	0.129	3.6444e-53	MHC-II+ ILC3	Arl2bp
Gcnt2	2.47146e-57	0.744369	0.22	0.11	4.44369e-53	MHC-II+ ILC3	Gcnt2
Bin2	2.90703e-57	1.07594	0.207	0.103	5.22683e-53	MHC-II+ ILC3	Bin2
Psen2	2.92415e-57	1.02439	0.208	0.104	5.25761e-53	MHC-II+ ILC3	Psen2
Ddx41	3.70756e-57	1.28063	0.169	0.074	6.6662e-53	MHC-II+ ILC3	Ddx41
Tshz1	6.64273e-57	1.94609	0.105	0.03	1.19436e-52	MHC-II+ ILC3	Tshz1
Cript	7.35399e-57	0.694809	0.38	0.256	1.32225e-52	MHC-II+ ILC3	Cript
Atp5h	9.39254e-57	0.330079	0.77	0.677	1.68878e-52	MHC-II+ ILC3	Atp5h
Ccrl2	1.10078e-56	0.557154	0.314	0.19	1.9792e-52	MHC-II+ ILC3	Ccrl2
Rbm39	1.31872e-56	0.268744	0.839	0.746	2.37105e-52	MHC-II+ ILC3	Rbm39
Zfand5	1.46596e-56	0.608376	0.506	0.378	2.6358e-52	MHC-II+ ILC3	Zfand5
Rabgef1	1.67784e-56	1.08857	0.227	0.121	3.01675e-52	MHC-II+ ILC3	Rabgef1
Pttg1ip	1.85734e-56	1.11509	0.204	0.102	3.3395e-52	MHC-II+ ILC3	Pttg1ip
Thra	1.99043e-56	2.00641	0.095	0.024	3.5788e-52	MHC-II+ ILC3	Thra
Hcls1	2.72784e-56	0.66967	0.286	0.166	4.90466e-52	MHC-II+ ILC3	Hcls1
Tmem30a	2.93393e-56	0.7467	0.336	0.216	5.2752e-52	MHC-II+ ILC3	Tmem30a
Emc4	3.94682e-56	0.797449	0.312	0.195	7.09638e-52	MHC-II+ ILC3	Emc4
Pon2	4.53832e-56	0.904558	0.265	0.154	8.1599e-52	MHC-II+ ILC3	Pon2
Npnt	4.80005e-56	3.09488	0.069	0.008	8.63048e-52	MHC-II+ ILC3	Npnt
Mgst2	4.81719e-56	1.55827	0.119	0.039	8.66131e-52	MHC-II+ ILC3	Mgst2
Srprb	5.03781e-56	1.24596	0.173	0.078	9.05799e-52	MHC-II+ ILC3	Srprb
Gab3	5.22368e-56	2.99779	0.07	0.009	9.39218e-52	MHC-II+ ILC3	Gab3
Timm17b	6.37751e-56	0.950287	0.255	0.145	1.14668e-51	MHC-II+ ILC3	Timm17b
Popdc3	9.10886e-56	3.56605	0.063	0.006	1.63777e-51	MHC-II+ ILC3	Popdc3
Slc39a4	9.71391e-56	2.82998	0.074	0.011	1.74656e-51	MHC-II+ ILC3	Slc39a4
Ppil4	1.47104e-55	0.858311	0.28	0.167	2.64493e-51	MHC-II+ ILC3	Ppil4
Smim4	1.79728e-55	1.43645	0.151	0.063	3.2315e-51	MHC-II+ ILC3	Smim4
Gm9844	2.00444e-55	1.75873	0.108	0.032	3.60398e-51	MHC-II+ ILC3	Gm9844
A630072M18Rik	2.0839e-55	2.04059	0.109	0.033	3.74685e-51	MHC-II+ ILC3	A630072M18Rik
Adam9	3.749e-55	1.20126	0.176	0.081	6.7407e-51	MHC-II+ ILC3	Adam9
Slc38a10	5.23444e-55	0.989563	0.221	0.117	9.41152e-51	MHC-II+ ILC3	Slc38a10
Fkbp2	6.19793e-55	1.17037	0.19	0.092	1.11439e-50	MHC-II+ ILC3	Fkbp2
Notch1	1.06552e-54	2.68019	0.074	0.012	1.9158e-50	MHC-II+ ILC3	Notch1
Cxcr4	1.10614e-54	1.17919	0.231	0.128	1.98883e-50	MHC-II+ ILC3	Cxcr4
Kcnmb4	1.30221e-54	2.22431	0.085	0.019	2.34138e-50	MHC-II+ ILC3	Kcnmb4
Pdp1	1.5944e-54	2.37368	0.083	0.017	2.86673e-50	MHC-II+ ILC3	Pdp1
Cox16	1.74478e-54	1.30114	0.159	0.069	3.13712e-50	MHC-II+ ILC3	Cox16
Fkbp1a	2.05565e-54	0.657462	0.367	0.245	3.69606e-50	MHC-II+ ILC3	Fkbp1a
Rbms2	2.38423e-54	1.10034	0.192	0.095	4.28685e-50	MHC-II+ ILC3	Rbms2
Sumo1	2.67975e-54	0.442941	0.616	0.493	4.81818e-50	MHC-II+ ILC3	Sumo1
Ciapin1	2.9113e-54	1.65667	0.181	0.088	5.23452e-50	MHC-II+ ILC3	Ciapin1
Spaca9	3.21893e-54	2.54189	0.077	0.014	5.78764e-50	MHC-II+ ILC3	Spaca9
Syf2	3.41718e-54	0.679304	0.387	0.267	6.14409e-50	MHC-II+ ILC3	Syf2
Bcl2l11	4.05013e-54	0.756783	0.269	0.156	7.28214e-50	MHC-II+ ILC3	Bcl2l11
Traf3ip2	6.46917e-54	1.85812	0.099	0.027	1.16316e-49	MHC-II+ ILC3	Traf3ip2
Nrg2	7.00073e-54	1.45942	0.138	0.054	1.25873e-49	MHC-II+ ILC3	Nrg2
Cox6c	7.20289e-54	0.341159	0.813	0.748	1.29508e-49	MHC-II+ ILC3	Cox6c
Msl2	7.39535e-54	1.10912	0.193	0.095	1.32968e-49	MHC-II+ ILC3	Msl2
Phpt1	7.98389e-54	1.36909	0.146	0.06	1.4355e-49	MHC-II+ ILC3	Phpt1
Nasp	9.40102e-54	0.770756	0.279	0.165	1.6903e-49	MHC-II+ ILC3	Nasp
Agpat2	9.69613e-54	1.95135	0.102	0.03	1.74336e-49	MHC-II+ ILC3	Agpat2
Kdelr2	1.19698e-53	1.12503	0.19	0.094	2.15217e-49	MHC-II+ ILC3	Kdelr2
Sec23b	1.2533e-53	0.92207	0.241	0.135	2.25344e-49	MHC-II+ ILC3	Sec23b
Nlrc3	1.36183e-53	3.44358	0.062	0.006	2.44857e-49	MHC-II+ ILC3	Nlrc3
Ndufa12	2.22917e-53	0.690918	0.352	0.232	4.00804e-49	MHC-II+ ILC3	Ndufa12
Ppp1r10	2.30171e-53	0.540352	0.397	0.271	4.13847e-49	MHC-II+ ILC3	Ppp1r10
Smco4	2.65054e-53	2.24275	0.086	0.019	4.76567e-49	MHC-II+ ILC3	Smco4
Tdrkh	3.13989e-53	1.62097	0.116	0.039	5.64553e-49	MHC-II+ ILC3	Tdrkh
Farp1	3.25523e-53	1.98707	0.085	0.019	5.8529e-49	MHC-II+ ILC3	Farp1
2025-09-09	3.81217e-53	0.871892	0.249	0.142	6.85428e-49	MHC-II+ ILC3	2025-09-09
1700016L21Rik	4.90352e-53	3.12094	0.064	0.007	8.81654e-49	MHC-II+ ILC3	1700016L21Rik
Dpy19l3	5.72718e-53	2.30104	0.079	0.016	1.02975e-48	MHC-II+ ILC3	Dpy19l3
Yaf2	6.76952e-53	1.28322	0.158	0.07	1.21716e-48	MHC-II+ ILC3	Yaf2
Rasa3	7.73984e-53	1.4617	0.126	0.046	1.39162e-48	MHC-II+ ILC3	Rasa3
Xrcc5	8.50306e-53	2.84132	0.069	0.01	1.52885e-48	MHC-II+ ILC3	Xrcc5
Lysmd3	9.23016e-53	1.42701	0.137	0.054	1.65958e-48	MHC-II+ ILC3	Lysmd3
Kmt2e	1.12249e-52	0.404066	0.57	0.438	2.01824e-48	MHC-II+ ILC3	Kmt2e
Cdc42se2	1.62096e-52	0.904375	0.235	0.131	2.91449e-48	MHC-II+ ILC3	Cdc42se2
Lpar6	1.92316e-52	1.99058	0.094	0.025	3.45783e-48	MHC-II+ ILC3	Lpar6
Socs5	2.38209e-52	2.12264	0.086	0.02	4.283e-48	MHC-II+ ILC3	Socs5
Slc12a7	3.81804e-52	2.70432	0.068	0.01	6.86484e-48	MHC-II+ ILC3	Slc12a7
G6pdx	7.08104e-52	1.23578	0.155	0.068	1.27317e-47	MHC-II+ ILC3	G6pdx
Itpr1	1.42256e-51	0.900978	0.211	0.11	2.55776e-47	MHC-II+ ILC3	Itpr1
Wdr43	1.74489e-51	0.991617	0.219	0.119	3.13731e-47	MHC-II+ ILC3	Wdr43
Was	1.92771e-51	0.946141	0.21	0.111	3.46603e-47	MHC-II+ ILC3	Was
Pgm2l1	2.08406e-51	2.88625	0.068	0.01	3.74713e-47	MHC-II+ ILC3	Pgm2l1
Rundc3b	2.6248e-51	2.10548	0.086	0.021	4.71939e-47	MHC-II+ ILC3	Rundc3b
Lyn	2.8295e-51	0.875584	0.368	0.263	5.08744e-47	MHC-II+ ILC3	Lyn
Srpk2	4.01985e-51	1.21775	0.162	0.074	7.22769e-47	MHC-II+ ILC3	Srpk2
Tbc1d10c	4.12155e-51	1.01802	0.209	0.112	7.41054e-47	MHC-II+ ILC3	Tbc1d10c
Ppp2r5a	4.39975e-51	0.673518	0.34	0.223	7.91075e-47	MHC-II+ ILC3	Ppp2r5a
Prickle1	5.13341e-51	2.29779	0.081	0.018	9.22987e-47	MHC-II+ ILC3	Prickle1
Hnrnpm	5.58166e-51	0.496549	0.487	0.362	1.00358e-46	MHC-II+ ILC3	Hnrnpm
Sf3b6	6.30859e-51	0.534882	0.484	0.364	1.13428e-46	MHC-II+ ILC3	Sf3b6
Eny2	6.33108e-51	0.783501	0.291	0.181	1.13833e-46	MHC-II+ ILC3	Eny2
Stk16	8.35554e-51	1.11447	0.183	0.09	1.50233e-46	MHC-II+ ILC3	Stk16
Mid1	8.63566e-51	1.3242	0.142	0.059	1.55269e-46	MHC-II+ ILC3	Mid1
Gm17745	9.37934e-51	3.39088	0.059	0.006	1.6864e-46	MHC-II+ ILC3	Gm17745
Arap1	9.46019e-51	1.17779	0.148	0.063	1.70094e-46	MHC-II+ ILC3	Arap1
S100a13	1.32368e-50	0.556827	0.459	0.341	2.37997e-46	MHC-II+ ILC3	S100a13
Ndufb2	1.41202e-50	0.772956	0.303	0.192	2.53882e-46	MHC-II+ ILC3	Ndufb2
Dtd1	1.5953e-50	1.94554	0.089	0.023	2.86835e-46	MHC-II+ ILC3	Dtd1
Gstm5	1.69424e-50	2.76995	0.07	0.012	3.04624e-46	MHC-II+ ILC3	Gstm5
H2-Ke6	1.75931e-50	1.45092	0.125	0.047	3.16324e-46	MHC-II+ ILC3	H2-Ke6
Foxp1	1.88022e-50	0.736446	0.264	0.154	3.38063e-46	MHC-II+ ILC3	Foxp1
Capns1	2.34166e-50	0.482373	0.516	0.397	4.2103e-46	MHC-II+ ILC3	Capns1
Foxo1	2.44508e-50	1.19589	0.185	0.093	4.39625e-46	MHC-II+ ILC3	Foxo1
Slc16a2	2.91925e-50	2.30625	0.077	0.016	5.24881e-46	MHC-II+ ILC3	Slc16a2
Ndufs8	4.45214e-50	0.675412	0.36	0.244	8.00496e-46	MHC-II+ ILC3	Ndufs8
S1pr4	5.23973e-50	2.63372	0.068	0.011	9.42104e-46	MHC-II+ ILC3	S1pr4
Dnttip2	6.02575e-50	0.824743	0.263	0.157	1.08343e-45	MHC-II+ ILC3	Dnttip2
Cox10	9.10003e-50	1.77406	0.098	0.029	1.63619e-45	MHC-II+ ILC3	Cox10
Bccip	9.71408e-50	0.983595	0.214	0.116	1.74659e-45	MHC-II+ ILC3	Bccip
BC005561	9.81682e-50	1.32042	0.143	0.061	1.76506e-45	MHC-II+ ILC3	BC005561
Ythdf1	1.41685e-49	1.0288	0.193	0.1	2.5475e-45	MHC-II+ ILC3	Ythdf1
Pnn	1.79195e-49	0.696103	0.342	0.229	3.22192e-45	MHC-II+ ILC3	Pnn
Aoah	2.08704e-49	3.17172	0.057	0.005	3.7525e-45	MHC-II+ ILC3	Aoah
Hgsnat	2.12502e-49	1.88984	0.096	0.028	3.82079e-45	MHC-II+ ILC3	Hgsnat
Rrm1	2.16593e-49	1.27149	0.153	0.069	3.89434e-45	MHC-II+ ILC3	Rrm1
Snrpd2	3.03343e-49	0.446689	0.529	0.405	5.45411e-45	MHC-II+ ILC3	Snrpd2
Zmat4	3.51059e-49	1.90453	0.086	0.022	6.31204e-45	MHC-II+ ILC3	Zmat4
Comt	3.60761e-49	1.13358	0.187	0.096	6.48648e-45	MHC-II+ ILC3	Comt
Cldn5	3.92937e-49	3.578	0.062	0.008	7.06501e-45	MHC-II+ ILC3	Cldn5
Ripor2	4.0964e-49	1.1689	0.141	0.059	7.36532e-45	MHC-II+ ILC3	Ripor2
Rhod	4.43421e-49	2.34066	0.073	0.014	7.9727e-45	MHC-II+ ILC3	Rhod
Entpd6	4.78939e-49	1.69225	0.104	0.034	8.61132e-45	MHC-II+ ILC3	Entpd6
Kdm5a	5.09233e-49	0.810128	0.26	0.155	9.15601e-45	MHC-II+ ILC3	Kdm5a
Riok1	5.29144e-49	1.15447	0.182	0.092	9.514e-45	MHC-II+ ILC3	Riok1
Rps29	5.84461e-49	0.128348	1	1	1.05086e-44	MHC-II+ ILC3	Rps29
Ralbp1	5.87689e-49	0.88232	0.26	0.157	1.05666e-44	MHC-II+ ILC3	Ralbp1
Golim4	6.29326e-49	1.61007	0.112	0.039	1.13153e-44	MHC-II+ ILC3	Golim4
Arih1	7.77664e-49	0.609674	0.375	0.258	1.39824e-44	MHC-II+ ILC3	Arih1
Map3k4	9.76366e-49	1.49896	0.108	0.036	1.75551e-44	MHC-II+ ILC3	Map3k4
Sesn1	1.18181e-48	1.61848	0.109	0.038	2.12489e-44	MHC-II+ ILC3	Sesn1
Cycs	1.18847e-48	0.436663	0.505	0.38	2.13686e-44	MHC-II+ ILC3	Cycs
Ccm2	1.21662e-48	0.90702	0.224	0.125	2.18749e-44	MHC-II+ ILC3	Ccm2
Mdn1	1.30776e-48	1.24457	0.144	0.063	2.35135e-44	MHC-II+ ILC3	Mdn1
Naa10	1.31199e-48	0.994139	0.211	0.115	2.35896e-44	MHC-II+ ILC3	Naa10
Sde2	1.60268e-48	0.918212	0.217	0.12	2.88162e-44	MHC-II+ ILC3	Sde2
Tacc1	1.83996e-48	0.78932	0.287	0.181	3.30825e-44	MHC-II+ ILC3	Tacc1
Abhd4	2.27761e-48	1.17507	0.161	0.075	4.09514e-44	MHC-II+ ILC3	Abhd4
Gspt1	2.87573e-48	0.728451	0.294	0.186	5.17056e-44	MHC-II+ ILC3	Gspt1
Dnajb4	3.74194e-48	1.72203	0.106	0.036	6.728e-44	MHC-II+ ILC3	Dnajb4
Eci1	4.70713e-48	1.06076	0.18	0.09	8.46341e-44	MHC-II+ ILC3	Eci1
Hspa13	6.99137e-48	1.20265	0.147	0.065	1.25705e-43	MHC-II+ ILC3	Hspa13
Brd2	8.57837e-48	0.390993	0.501	0.375	1.54239e-43	MHC-II+ ILC3	Brd2
Mrps28	1.10294e-47	1.02638	0.189	0.098	1.98308e-43	MHC-II+ ILC3	Mrps28
Prps2	1.28257e-47	1.42991	0.118	0.044	2.30606e-43	MHC-II+ ILC3	Prps2
Ppfia1	2.39693e-47	1.19774	0.181	0.093	4.30969e-43	MHC-II+ ILC3	Ppfia1
Mphosph8	2.60813e-47	1.01257	0.203	0.11	4.68942e-43	MHC-II+ ILC3	Mphosph8
Adcy7	2.71074e-47	1.35562	0.119	0.045	4.87392e-43	MHC-II+ ILC3	Adcy7
Calr	2.75502e-47	0.275095	0.773	0.681	4.95353e-43	MHC-II+ ILC3	Calr
Nek1	3.71025e-47	1.64725	0.097	0.03	6.67103e-43	MHC-II+ ILC3	Nek1
Hid1	4.00002e-47	3.12799	0.059	0.007	7.19203e-43	MHC-II+ ILC3	Hid1
Zdhhc20	4.51813e-47	0.998924	0.182	0.092	8.12361e-43	MHC-II+ ILC3	Zdhhc20
Fndc3a	6.45615e-47	0.876325	0.202	0.108	1.16082e-42	MHC-II+ ILC3	Fndc3a
Ssr4	7.92812e-47	0.480423	0.519	0.403	1.42548e-42	MHC-II+ ILC3	Ssr4
Nrp1	8.2381e-47	1.30182	0.131	0.054	1.48121e-42	MHC-II+ ILC3	Nrp1
Adk	1.24391e-46	1.76861	0.092	0.027	2.23654e-42	MHC-II+ ILC3	Adk
Brwd1	1.43962e-46	1.0389	0.176	0.089	2.58843e-42	MHC-II+ ILC3	Brwd1
Metap1d	2.11005e-46	1.69348	0.096	0.03	3.79387e-42	MHC-II+ ILC3	Metap1d
Tmed9	2.35089e-46	0.679294	0.329	0.221	4.2269e-42	MHC-II+ ILC3	Tmed9
Pear1	3.28903e-46	3.30689	0.053	0.005	5.91367e-42	MHC-II+ ILC3	Pear1
Ulk1	3.49976e-46	1.30978	0.133	0.056	6.29257e-42	MHC-II+ ILC3	Ulk1
Adam12	4.78568e-46	1.71765	0.094	0.029	8.60466e-42	MHC-II+ ILC3	Adam12
Scp2	5.59422e-46	0.43457	0.468	0.35	1.00584e-41	MHC-II+ ILC3	Scp2
Ogt	5.75489e-46	0.841231	0.219	0.122	1.03473e-41	MHC-II+ ILC3	Ogt
Itih1	6.63364e-46	2.84473	0.059	0.008	1.19273e-41	MHC-II+ ILC3	Itih1
Snrnp70	7.45254e-46	0.498935	0.459	0.341	1.33997e-41	MHC-II+ ILC3	Snrnp70
Ctdsp1	8.10123e-46	0.914204	0.204	0.112	1.4566e-41	MHC-II+ ILC3	Ctdsp1
Hdac7	8.21249e-46	1.68633	0.098	0.032	1.47661e-41	MHC-II+ ILC3	Hdac7
Pacsin1	9.63855e-46	2.52348	0.07	0.014	1.73301e-41	MHC-II+ ILC3	Pacsin1
Cwc15	9.73893e-46	0.51959	0.463	0.351	1.75106e-41	MHC-II+ ILC3	Cwc15
Tns4	9.77863e-46	3.83818	0.051	0.004	1.7582e-41	MHC-II+ ILC3	Tns4
Zdbf2	1.12645e-45	1.38611	0.133	0.057	2.02535e-41	MHC-II+ ILC3	Zdbf2
Morf4l1	1.17764e-45	0.357841	0.663	0.561	2.1174e-41	MHC-II+ ILC3	Morf4l1
Lsm7	1.32066e-45	0.770739	0.261	0.161	2.37454e-41	MHC-II+ ILC3	Lsm7
H13	2.00985e-45	0.498937	0.45	0.332	3.61371e-41	MHC-II+ ILC3	H13
Cyc1	2.46793e-45	0.635267	0.341	0.231	4.43733e-41	MHC-II+ ILC3	Cyc1
Smarca2	2.5119e-45	0.671848	0.296	0.188	4.5164e-41	MHC-II+ ILC3	Smarca2
Ndufs5	3.51048e-45	0.573822	0.397	0.288	6.31185e-41	MHC-II+ ILC3	Ndufs5
Phf3	4.09024e-45	0.624773	0.34	0.231	7.35426e-41	MHC-II+ ILC3	Phf3
Ggt5	4.29179e-45	2.09772	0.075	0.018	7.71664e-41	MHC-II+ ILC3	Ggt5
Brap	4.38475e-45	1.0752	0.164	0.081	7.88377e-41	MHC-II+ ILC3	Brap
Lax1	4.95545e-45	2.1243	0.073	0.017	8.9099e-41	MHC-II+ ILC3	Lax1
Yipf3	5.01281e-45	0.736338	0.286	0.183	9.01303e-41	MHC-II+ ILC3	Yipf3
Aldh3a1	6.52214e-45	4.29601	0.047	0.002	1.17268e-40	MHC-II+ ILC3	Aldh3a1
Rd3	7.61188e-45	4.02405	0.047	0.003	1.36862e-40	MHC-II+ ILC3	Rd3
Sfn	7.74236e-45	1.90179	0.086	0.025	1.39208e-40	MHC-II+ ILC3	Sfn
Urod	8.67792e-45	1.19073	0.144	0.065	1.56029e-40	MHC-II+ ILC3	Urod
Larp1b	1.02362e-44	1.09396	0.179	0.093	1.84048e-40	MHC-II+ ILC3	Larp1b
Tmem248	1.18738e-44	0.837264	0.224	0.129	2.13492e-40	MHC-II+ ILC3	Tmem248
Cr1l	1.20371e-44	0.651697	0.325	0.219	2.16428e-40	MHC-II+ ILC3	Cr1l
Cdc20	1.38804e-44	2.29867	0.071	0.016	2.49569e-40	MHC-II+ ILC3	Cdc20
Mthfr	2.3191e-44	1.2196	0.139	0.062	4.16974e-40	MHC-II+ ILC3	Mthfr
Fh1	2.54528e-44	0.877785	0.205	0.114	4.57641e-40	MHC-II+ ILC3	Fh1
Elavl1	3.87016e-44	0.617593	0.355	0.248	6.95855e-40	MHC-II+ ILC3	Elavl1
Acpp	4.00847e-44	2.29355	0.069	0.015	7.20722e-40	MHC-II+ ILC3	Acpp
Spata13	4.85589e-44	2.92259	0.055	0.007	8.73089e-40	MHC-II+ ILC3	Spata13
Tbc1d30	4.92117e-44	1.80734	0.087	0.026	8.84826e-40	MHC-II+ ILC3	Tbc1d30
Hnrnpk	5.14816e-44	0.310683	0.741	0.642	9.25639e-40	MHC-II+ ILC3	Hnrnpk
Trim39	5.15359e-44	1.53844	0.106	0.039	9.26616e-40	MHC-II+ ILC3	Trim39
Kcnab2	5.69602e-44	1.72799	0.094	0.03	1.02414e-39	MHC-II+ ILC3	Kcnab2
Gm31887	6.79812e-44	3.9953	0.048	0.003	1.2223e-39	MHC-II+ ILC3	Gm31887
Mafg	7.34677e-44	0.935034	0.195	0.107	1.32095e-39	MHC-II+ ILC3	Mafg
Sec61a1	1.20035e-43	0.658908	0.324	0.22	2.15823e-39	MHC-II+ ILC3	Sec61a1
Prkacb	1.28217e-43	1.20457	0.14	0.063	2.30533e-39	MHC-II+ ILC3	Prkacb
Ints6l	1.47898e-43	1.70278	0.089	0.028	2.65921e-39	MHC-II+ ILC3	Ints6l
Dennd4c	1.50416e-43	1.84428	0.08	0.022	2.70448e-39	MHC-II+ ILC3	Dennd4c
Slc20a1	1.71084e-43	1.11613	0.207	0.119	3.07609e-39	MHC-II+ ILC3	Slc20a1
1810073O08Rik	2.90241e-43	3.96042	0.047	0.003	5.21854e-39	MHC-II+ ILC3	1810073O08Rik
Ctsl	2.99606e-43	0.761461	0.183	0.096	5.38691e-39	MHC-II+ ILC3	Ctsl
Tlcd1	3.80173e-43	2.16094	0.073	0.018	6.83551e-39	MHC-II+ ILC3	Tlcd1
Zscan26	3.92878e-43	0.848143	0.199	0.11	7.06395e-39	MHC-II+ ILC3	Zscan26
Dus2	5.35581e-43	1.96381	0.081	0.023	9.62974e-39	MHC-II+ ILC3	Dus2
Fbxl6	5.91502e-43	0.985031	0.183	0.098	1.06352e-38	MHC-II+ ILC3	Fbxl6
Bclaf1	7.81703e-43	0.455325	0.451	0.333	1.4055e-38	MHC-II+ ILC3	Bclaf1
2810459M11Rik	8.12749e-43	2.39737	0.061	0.011	1.46132e-38	MHC-II+ ILC3	2810459M11Rik
Chd1	9.61193e-43	0.580771	0.365	0.259	1.72823e-38	MHC-II+ ILC3	Chd1
Rasgrp4	1.00705e-42	1.29928	0.119	0.049	1.81068e-38	MHC-II+ ILC3	Rasgrp4
Nars	1.17356e-42	0.751041	0.292	0.193	2.11006e-38	MHC-II+ ILC3	Nars
Fbxo34	1.27017e-42	1.30644	0.14	0.065	2.28376e-38	MHC-II+ ILC3	Fbxo34
Whrn	1.32121e-42	1.24963	0.124	0.052	2.37554e-38	MHC-II+ ILC3	Whrn
Nktr	1.55088e-42	0.616824	0.316	0.212	2.78848e-38	MHC-II+ ILC3	Nktr
Fam3c	1.69808e-42	1.65187	0.09	0.029	3.05315e-38	MHC-II+ ILC3	Fam3c
Eif3a	2.27703e-42	0.3953	0.668	0.573	4.09409e-38	MHC-II+ ILC3	Eif3a
AU020206	2.58369e-42	0.621109	0.309	0.204	4.64547e-38	MHC-II+ ILC3	AU020206
Afg3l2	2.68772e-42	1.34412	0.12	0.05	4.83252e-38	MHC-II+ ILC3	Afg3l2
Azi2	2.72547e-42	0.955041	0.179	0.095	4.90039e-38	MHC-II+ ILC3	Azi2
Rps6ka3	3.16451e-42	0.829994	0.2	0.112	5.68979e-38	MHC-II+ ILC3	Rps6ka3
Pura	3.49913e-42	0.703265	0.265	0.167	6.29143e-38	MHC-II+ ILC3	Pura
Smyd3	4.0695e-42	1.33796	0.1	0.036	7.31697e-38	MHC-II+ ILC3	Smyd3
Ctdsp2	4.18029e-42	0.734988	0.257	0.161	7.51616e-38	MHC-II+ ILC3	Ctdsp2
Dynlt3	4.55075e-42	0.984511	0.179	0.096	8.18225e-38	MHC-II+ ILC3	Dynlt3
Grina	5.27799e-42	0.586134	0.307	0.203	9.48983e-38	MHC-II+ ILC3	Grina
1300002E11Rik	5.71136e-42	1.88952	0.08	0.023	1.0269e-37	MHC-II+ ILC3	1300002E11Rik
Hspbp1	7.74568e-42	1.12694	0.141	0.066	1.39267e-37	MHC-II+ ILC3	Hspbp1
Zfp52	7.90861e-42	1.59356	0.096	0.034	1.42197e-37	MHC-II+ ILC3	Zfp52
Gtf2b	9.8583e-42	0.686939	0.303	0.203	1.77252e-37	MHC-II+ ILC3	Gtf2b
Zfp131	9.88997e-42	0.851525	0.218	0.128	1.77822e-37	MHC-II+ ILC3	Zfp131
Prelid1	1.30335e-41	0.398295	0.547	0.433	2.34342e-37	MHC-II+ ILC3	Prelid1
Tmem71	1.38417e-41	2.81612	0.055	0.008	2.48875e-37	MHC-II+ ILC3	Tmem71
Atp2a2	1.50548e-41	0.964146	0.189	0.105	2.70686e-37	MHC-II+ ILC3	Atp2a2
Isyna1	1.50567e-41	0.759886	0.243	0.15	2.7072e-37	MHC-II+ ILC3	Isyna1
Serinc1	1.50624e-41	0.620266	0.312	0.209	2.70821e-37	MHC-II+ ILC3	Serinc1
Gm19585	1.54735e-41	3.39818	0.048	0.005	2.78214e-37	MHC-II+ ILC3	Gm19585
Zfp652	1.68635e-41	1.14024	0.133	0.06	3.03206e-37	MHC-II+ ILC3	Zfp652
Cct6a	1.87016e-41	0.489107	0.452	0.345	3.36255e-37	MHC-II+ ILC3	Cct6a
Dennd3	2.17225e-41	0.795994	0.222	0.131	3.9057e-37	MHC-II+ ILC3	Dennd3
Park7	2.19648e-41	0.437675	0.508	0.396	3.94926e-37	MHC-II+ ILC3	Park7
Stip1	2.54783e-41	0.588324	0.35	0.246	4.58099e-37	MHC-II+ ILC3	Stip1
Gm11551	3.05929e-41	4.52074	0.042	0.002	5.5006e-37	MHC-II+ ILC3	Gm11551
Siah2	3.3356e-41	0.767712	0.201	0.113	5.99741e-37	MHC-II+ ILC3	Siah2
Pspc1	3.63443e-41	0.923473	0.184	0.101	6.53471e-37	MHC-II+ ILC3	Pspc1
Mvb12b	4.03875e-41	1.67076	0.086	0.027	7.26167e-37	MHC-II+ ILC3	Mvb12b
Tmco1	4.3988e-41	0.778263	0.254	0.161	7.90904e-37	MHC-II+ ILC3	Tmco1
1110038B12Rik	4.50512e-41	0.899055	0.209	0.122	8.10021e-37	MHC-II+ ILC3	1110038B12Rik
mt-Nd4	7.0857e-41	0.117484	0.997	0.967	1.27401e-36	MHC-II+ ILC3	mt-Nd4
Rbm33	7.56878e-41	0.873853	0.196	0.11	1.36087e-36	MHC-II+ ILC3	Rbm33
Ptk2b	7.85848e-41	0.602605	0.288	0.187	1.41296e-36	MHC-II+ ILC3	Ptk2b
Yod1	7.91148e-41	2.28766	0.069	0.017	1.42248e-36	MHC-II+ ILC3	Yod1
Hpn	8.5806e-41	4.11223	0.043	0.003	1.54279e-36	MHC-II+ ILC3	Hpn
Selenof	8.954e-41	0.490612	0.435	0.328	1.60993e-36	MHC-II+ ILC3	Selenof
Il4ra	9.32019e-41	0.480482	0.493	0.39	1.67577e-36	MHC-II+ ILC3	Il4ra
2510002D24Rik	9.82273e-41	1.18442	0.137	0.064	1.76613e-36	MHC-II+ ILC3	2510002D24Rik
Ccny	1.21396e-40	0.906212	0.183	0.1	2.1827e-36	MHC-II+ ILC3	Ccny
Zfpm1	1.50971e-40	1.76688	0.082	0.025	2.71445e-36	MHC-II+ ILC3	Zfpm1
Top1	1.55911e-40	0.414417	0.486	0.372	2.80328e-36	MHC-II+ ILC3	Top1
Skil	1.90361e-40	0.355385	0.494	0.369	3.42268e-36	MHC-II+ ILC3	Skil
Set	1.96089e-40	0.326354	0.535	0.411	3.52568e-36	MHC-II+ ILC3	Set
Gm15417	2.09417e-40	2.09197	0.069	0.017	3.76532e-36	MHC-II+ ILC3	Gm15417
Pcf11	2.12917e-40	0.59051	0.295	0.193	3.82825e-36	MHC-II+ ILC3	Pcf11
Spcs3	2.30847e-40	0.925162	0.183	0.1	4.15062e-36	MHC-II+ ILC3	Spcs3
Tsn	2.31529e-40	0.685104	0.29	0.193	4.16288e-36	MHC-II+ ILC3	Tsn
Sf3b5	3.08116e-40	0.563795	0.394	0.29	5.53993e-36	MHC-II+ ILC3	Sf3b5
Znrf3	3.1855e-40	2.13612	0.063	0.014	5.72754e-36	MHC-II+ ILC3	Znrf3
Shmt2	3.43294e-40	1.22325	0.123	0.054	6.17242e-36	MHC-II+ ILC3	Shmt2
Ing1	4.09917e-40	0.823158	0.236	0.146	7.37031e-36	MHC-II+ ILC3	Ing1
Rab3gap1	4.26384e-40	1.12892	0.139	0.066	7.66639e-36	MHC-II+ ILC3	Rab3gap1
Adgrl1	4.62264e-40	1.54513	0.092	0.032	8.3115e-36	MHC-II+ ILC3	Adgrl1
Rpl7	5.86776e-40	0.146573	0.995	0.988	1.05502e-35	MHC-II+ ILC3	Rpl7
Csnk1g3	6.18755e-40	0.886321	0.207	0.122	1.11252e-35	MHC-II+ ILC3	Csnk1g3
Ubxn6	6.23402e-40	0.831282	0.223	0.135	1.12088e-35	MHC-II+ ILC3	Ubxn6
Clp1	7.29842e-40	0.936022	0.176	0.095	1.31226e-35	MHC-II+ ILC3	Clp1
Tob1	7.45011e-40	1.15348	0.147	0.073	1.33953e-35	MHC-II+ ILC3	Tob1
Hsd11b1	7.83877e-40	3.03836	0.049	0.006	1.40941e-35	MHC-II+ ILC3	Hsd11b1
Tcrg-C2	9.77696e-40	4.5881	0.041	0.002	1.7579e-35	MHC-II+ ILC3	Tcrg-C2
Smim11	1.13942e-39	1.0033	0.165	0.086	2.04869e-35	MHC-II+ ILC3	Smim11
Rsrc2	1.26936e-39	0.514052	0.401	0.294	2.28231e-35	MHC-II+ ILC3	Rsrc2
Creb3l2	1.33194e-39	1.94195	0.069	0.017	2.39483e-35	MHC-II+ ILC3	Creb3l2
Tpr	1.33543e-39	0.423529	0.542	0.434	2.4011e-35	MHC-II+ ILC3	Tpr
Slc2a3	1.47058e-39	1.97465	0.073	0.02	2.6441e-35	MHC-II+ ILC3	Slc2a3
Rflnb	1.48783e-39	2.93832	0.048	0.005	2.67511e-35	MHC-II+ ILC3	Rflnb
Maf1	1.72784e-39	0.70618	0.254	0.161	3.10666e-35	MHC-II+ ILC3	Maf1
Slc25a51	1.87674e-39	1.01243	0.163	0.086	3.37438e-35	MHC-II+ ILC3	Slc25a51
Stk39	2.17402e-39	1.56493	0.083	0.027	3.90889e-35	MHC-II+ ILC3	Stk39
Map4k2	2.1998e-39	1.19423	0.123	0.054	3.95524e-35	MHC-II+ ILC3	Map4k2
Lsm8	2.60641e-39	0.863753	0.243	0.154	4.68632e-35	MHC-II+ ILC3	Lsm8
Sfr1	2.67291e-39	0.541091	0.404	0.302	4.80588e-35	MHC-II+ ILC3	Sfr1
Nab2	2.95941e-39	0.944268	0.16	0.083	5.32102e-35	MHC-II+ ILC3	Nab2
Srpk1	3.88559e-39	0.797571	0.224	0.135	6.9863e-35	MHC-II+ ILC3	Srpk1
Ranbp2	4.21946e-39	0.523388	0.293	0.192	7.58659e-35	MHC-II+ ILC3	Ranbp2
Clcn4	4.82264e-39	0.930954	0.164	0.086	8.67111e-35	MHC-II+ ILC3	Clcn4
Gm15918	5.01654e-39	4.85421	0.039	0.001	9.01974e-35	MHC-II+ ILC3	Gm15918
Tle4	6.28004e-39	1.16181	0.132	0.061	1.12915e-34	MHC-II+ ILC3	Tle4
Aco2	6.30183e-39	0.694481	0.271	0.177	1.13307e-34	MHC-II+ ILC3	Aco2
Srp14	7.24556e-39	0.444804	0.48	0.375	1.30275e-34	MHC-II+ ILC3	Srp14
Elovl6	7.55503e-39	2.538	0.056	0.01	1.3584e-34	MHC-II+ ILC3	Elovl6
Tiam1	9.42843e-39	1.20957	0.114	0.049	1.69523e-34	MHC-II+ ILC3	Tiam1
Gtf2h5	9.80715e-39	0.709444	0.278	0.186	1.76332e-34	MHC-II+ ILC3	Gtf2h5
Wbp1l	9.9892e-39	1.02293	0.159	0.083	1.79606e-34	MHC-II+ ILC3	Wbp1l
Ssrp1	1.31426e-38	0.582882	0.295	0.197	2.36305e-34	MHC-II+ ILC3	Ssrp1
Mtss1	1.38033e-38	1.58734	0.084	0.028	2.48183e-34	MHC-II+ ILC3	Mtss1
Akirin1	1.43148e-38	0.592858	0.34	0.242	2.57381e-34	MHC-II+ ILC3	Akirin1
Nfatc3	1.69604e-38	0.924706	0.175	0.096	3.04947e-34	MHC-II+ ILC3	Nfatc3
Elk4	1.74041e-38	1.01647	0.145	0.072	3.12927e-34	MHC-II+ ILC3	Elk4
Tnrc6c	2.2767e-38	0.679181	0.234	0.144	4.09352e-34	MHC-II+ ILC3	Tnrc6c
Bola3	2.70548e-38	0.842424	0.197	0.114	4.86445e-34	MHC-II+ ILC3	Bola3
Ctla4	3.19047e-38	1.66171	0.094	0.035	5.73646e-34	MHC-II+ ILC3	Ctla4
Fam120b	3.37344e-38	0.806364	0.193	0.11	6.06545e-34	MHC-II+ ILC3	Fam120b
Fuca2	3.78613e-38	1.23944	0.125	0.057	6.80746e-34	MHC-II+ ILC3	Fuca2
Derl1	4.02736e-38	0.649702	0.293	0.198	7.2412e-34	MHC-II+ ILC3	Derl1
Ybx1	4.09019e-38	0.20908	0.79	0.705	7.35416e-34	MHC-II+ ILC3	Ybx1
Ccng2	4.6833e-38	0.599163	0.286	0.19	8.42057e-34	MHC-II+ ILC3	Ccng2
Snrpd3	4.73144e-38	0.480322	0.389	0.285	8.50713e-34	MHC-II+ ILC3	Snrpd3
Eif4g1	5.88092e-38	0.532505	0.356	0.255	1.05739e-33	MHC-II+ ILC3	Eif4g1
Slc35b2	7.07316e-38	0.579706	0.291	0.194	1.27175e-33	MHC-II+ ILC3	Slc35b2
C2	8.05949e-38	1.79232	0.077	0.024	1.4491e-33	MHC-II+ ILC3	C2
Rusc1	8.24537e-38	0.927451	0.211	0.128	1.48252e-33	MHC-II+ ILC3	Rusc1
Dnajb2	8.69828e-38	0.710591	0.255	0.164	1.56395e-33	MHC-II+ ILC3	Dnajb2
Rrp1b	8.85609e-38	1.40873	0.101	0.04	1.59232e-33	MHC-II+ ILC3	Rrp1b
Ppp1cb	1.10727e-37	0.526353	0.343	0.242	1.99086e-33	MHC-II+ ILC3	Ppp1cb
Timp2	1.12893e-37	1.90604	0.062	0.014	2.02982e-33	MHC-II+ ILC3	Timp2
Eif3j1	1.53148e-37	0.705699	0.244	0.154	2.75359e-33	MHC-II+ ILC3	Eif3j1
Hp1bp3	1.61498e-37	0.480958	0.406	0.303	2.90374e-33	MHC-II+ ILC3	Hp1bp3
Fgd3	1.8165e-37	1.79806	0.072	0.02	3.26607e-33	MHC-II+ ILC3	Fgd3
Polr2k	1.81768e-37	0.686125	0.278	0.186	3.2682e-33	MHC-II+ ILC3	Polr2k
Sgtb	2.29044e-37	3.52469	0.042	0.004	4.11821e-33	MHC-II+ ILC3	Sgtb
2310033P09Rik	2.56436e-37	0.934326	0.18	0.102	4.61072e-33	MHC-II+ ILC3	2310033P09Rik
Tiprl	2.79583e-37	0.854779	0.215	0.132	5.0269e-33	MHC-II+ ILC3	Tiprl
Rab7	3.11163e-37	0.460253	0.498	0.401	5.59472e-33	MHC-II+ ILC3	Rab7
Pdcd6	3.49749e-37	0.583175	0.343	0.247	6.28849e-33	MHC-II+ ILC3	Pdcd6
Il17f	3.5552e-37	2.94157	0.053	0.009	6.39226e-33	MHC-II+ ILC3	Il17f
Adgra3	3.62725e-37	3.31847	0.043	0.004	6.52179e-33	MHC-II+ ILC3	Adgra3
Slc2a1	4.01788e-37	1.41401	0.115	0.051	7.22414e-33	MHC-II+ ILC3	Slc2a1
Tmem59	4.08808e-37	0.546066	0.401	0.303	7.35037e-33	MHC-II+ ILC3	Tmem59
Cad	4.31216e-37	1.77209	0.073	0.022	7.75327e-33	MHC-II+ ILC3	Cad
Swi5	4.40036e-37	0.405725	0.498	0.39	7.91184e-33	MHC-II+ ILC3	Swi5
Edf1	4.67988e-37	0.321891	0.729	0.657	8.41442e-33	MHC-II+ ILC3	Edf1
Slc50a1	5.20319e-37	0.759362	0.225	0.139	9.35533e-33	MHC-II+ ILC3	Slc50a1
Prpf38a	5.55908e-37	0.887034	0.183	0.104	9.99523e-33	MHC-II+ ILC3	Prpf38a
Sema4d	6.10583e-37	0.685679	0.19	0.108	1.09783e-32	MHC-II+ ILC3	Sema4d
Ppme1	6.35586e-37	1.11441	0.13	0.062	1.14278e-32	MHC-II+ ILC3	Ppme1
Uqcrc1	7.12422e-37	0.44515	0.435	0.328	1.28093e-32	MHC-II+ ILC3	Uqcrc1
Frmd6	8.52726e-37	2.29609	0.058	0.013	1.5332e-32	MHC-II+ ILC3	Frmd6
Rela	9.69521e-37	0.396403	0.479	0.371	1.7432e-32	MHC-II+ ILC3	Rela
Sec61g	1.03791e-36	0.312794	0.726	0.659	1.86616e-32	MHC-II+ ILC3	Sec61g
Rln3	1.17074e-36	4.32157	0.038	0.002	2.10499e-32	MHC-II+ ILC3	Rln3
H2afv	1.21782e-36	0.475806	0.399	0.298	2.18964e-32	MHC-II+ ILC3	H2afv
Sec61b	1.32909e-36	0.228664	0.79	0.728	2.3897e-32	MHC-II+ ILC3	Sec61b
Arhgef18	1.34221e-36	1.80301	0.071	0.021	2.41329e-32	MHC-II+ ILC3	Arhgef18
Spice1	1.52889e-36	1.79787	0.074	0.023	2.74894e-32	MHC-II+ ILC3	Spice1
Rab19	1.98181e-36	2.53746	0.052	0.009	3.56329e-32	MHC-II+ ILC3	Rab19
Itpkb	2.22036e-36	1.07892	0.132	0.064	3.9922e-32	MHC-II+ ILC3	Itpkb
D030028A08Rik	2.2306e-36	2.96973	0.047	0.007	4.01061e-32	MHC-II+ ILC3	D030028A08Rik
Apbb1ip	2.23674e-36	0.500434	0.371	0.269	4.02166e-32	MHC-II+ ILC3	Apbb1ip
Pnpla2	2.29481e-36	0.54903	0.317	0.22	4.12608e-32	MHC-II+ ILC3	Pnpla2
Nr3c1	2.35112e-36	0.702822	0.25	0.161	4.22732e-32	MHC-II+ ILC3	Nr3c1
BC018473	2.72915e-36	4.6794	0.037	0.002	4.907e-32	MHC-II+ ILC3	BC018473
Tmem147	2.73965e-36	0.855924	0.188	0.109	4.92589e-32	MHC-II+ ILC3	Tmem147
Jakmip1	2.74374e-36	2.72139	0.047	0.007	4.93324e-32	MHC-II+ ILC3	Jakmip1
Il12rb1	3.12621e-36	3.56811	0.041	0.004	5.62093e-32	MHC-II+ ILC3	Il12rb1
5430416N02Rik	3.22572e-36	1.31304	0.107	0.046	5.79984e-32	MHC-II+ ILC3	5430416N02Rik
Atp5b	4.23071e-36	0.210221	0.855	0.788	7.60681e-32	MHC-II+ ILC3	Atp5b
Ubash3a	4.59313e-36	2.00873	0.063	0.016	8.25845e-32	MHC-II+ ILC3	Ubash3a
Emid1	5.27619e-36	3.65694	0.04	0.003	9.4866e-32	MHC-II+ ILC3	Emid1
Npm3	5.91517e-36	0.898958	0.176	0.1	1.06355e-31	MHC-II+ ILC3	Npm3
Trib2	6.57655e-36	3.4543	0.042	0.004	1.18246e-31	MHC-II+ ILC3	Trib2
Acadvl	6.83613e-36	0.83654	0.189	0.11	1.22914e-31	MHC-II+ ILC3	Acadvl
Raet1e	7.40974e-36	1.75463	0.081	0.028	1.33227e-31	MHC-II+ ILC3	Raet1e
Tceal9	7.61359e-36	0.892794	0.162	0.087	1.36892e-31	MHC-II+ ILC3	Tceal9
Akap8l	7.76119e-36	0.491525	0.324	0.225	1.39546e-31	MHC-II+ ILC3	Akap8l
Idh3g	8.65481e-36	0.54793	0.369	0.273	1.55614e-31	MHC-II+ ILC3	Idh3g
Zswim4	8.80885e-36	1.04743	0.141	0.071	1.58383e-31	MHC-II+ ILC3	Zswim4
Tcf4	9.01575e-36	0.675331	0.216	0.131	1.62103e-31	MHC-II+ ILC3	Tcf4
Slc32a1	9.61395e-36	2.89444	0.048	0.008	1.72859e-31	MHC-II+ ILC3	Slc32a1
Cox8a	9.61964e-36	0.228882	0.871	0.846	1.72961e-31	MHC-II+ ILC3	Cox8a
Morf4l2	1.029e-35	0.561749	0.334	0.239	1.85014e-31	MHC-II+ ILC3	Morf4l2
Lbh	1.03941e-35	0.989284	0.149	0.078	1.86885e-31	MHC-II+ ILC3	Lbh
Ptges3	1.09777e-35	0.403954	0.495	0.394	1.97379e-31	MHC-II+ ILC3	Ptges3
Rab24	1.14541e-35	0.998296	0.147	0.076	2.05944e-31	MHC-II+ ILC3	Rab24
Top2b	1.20862e-35	0.583354	0.311	0.216	2.1731e-31	MHC-II+ ILC3	Top2b
Tnfsf14	1.33222e-35	2.52532	0.051	0.009	2.39534e-31	MHC-II+ ILC3	Tnfsf14
Tnfrsf21	1.36721e-35	1.92041	0.065	0.017	2.45824e-31	MHC-II+ ILC3	Tnfrsf21
Ubap2l	1.44035e-35	0.460853	0.409	0.308	2.58975e-31	MHC-II+ ILC3	Ubap2l
Gm33104	1.4627e-35	4.58792	0.036	0.002	2.62994e-31	MHC-II+ ILC3	Gm33104
Cars	1.66841e-35	1.37774	0.093	0.036	2.99981e-31	MHC-II+ ILC3	Cars
Dnajb1	1.80598e-35	1.01264	0.327	0.237	3.24715e-31	MHC-II+ ILC3	Dnajb1
Nfatc2	1.99057e-35	1.53875	0.085	0.031	3.57904e-31	MHC-II+ ILC3	Nfatc2
Fam162a	2.13546e-35	0.94811	0.17	0.095	3.83957e-31	MHC-II+ ILC3	Fam162a
Copb2	2.21425e-35	0.565311	0.314	0.22	3.98122e-31	MHC-II+ ILC3	Copb2
Cers2	2.33055e-35	0.767653	0.211	0.13	4.19034e-31	MHC-II+ ILC3	Cers2
Mbnl3	2.47471e-35	1.7339	0.076	0.025	4.44953e-31	MHC-II+ ILC3	Mbnl3
Hk1	2.7874e-35	0.988866	0.142	0.073	5.01174e-31	MHC-II+ ILC3	Hk1
Stx5a	3.03057e-35	0.643076	0.264	0.175	5.44897e-31	MHC-II+ ILC3	Stx5a
Hopx	3.17505e-35	1.99368	0.067	0.019	5.70874e-31	MHC-II+ ILC3	Hopx
Pigl	3.17816e-35	1.80017	0.067	0.019	5.71433e-31	MHC-II+ ILC3	Pigl
Ech1	3.50681e-35	0.606582	0.279	0.188	6.30524e-31	MHC-II+ ILC3	Ech1
Zfhx2	3.8741e-35	1.46291	0.085	0.031	6.96564e-31	MHC-II+ ILC3	Zfhx2
Pdcd11	4.74852e-35	1.16413	0.12	0.056	8.53784e-31	MHC-II+ ILC3	Pdcd11
Snx14	5.33927e-35	1.09942	0.118	0.054	9.6e-31	MHC-II+ ILC3	Snx14
Gm31392	5.61333e-35	3.81325	0.038	0.003	1.00928e-30	MHC-II+ ILC3	Gm31392
Adipor1	5.89832e-35	0.551478	0.32	0.226	1.06052e-30	MHC-II+ ILC3	Adipor1
Klrb1c	6.14737e-35	2.72159	0.044	0.006	1.1053e-30	MHC-II+ ILC3	Klrb1c
Cds2	6.15307e-35	1.26803	0.107	0.046	1.10632e-30	MHC-II+ ILC3	Cds2
Hectd1	6.15899e-35	0.616141	0.278	0.187	1.10739e-30	MHC-II+ ILC3	Hectd1
A930001A20Rik	6.16783e-35	5.26126	0.034	0.001	1.10898e-30	MHC-II+ ILC3	A930001A20Rik
Acot7	6.26966e-35	0.731498	0.231	0.147	1.12729e-30	MHC-II+ ILC3	Acot7
Card11	7.56119e-35	0.955563	0.129	0.062	1.3595e-30	MHC-II+ ILC3	Card11
Ip6k1	7.87033e-35	0.77144	0.192	0.113	1.41508e-30	MHC-II+ ILC3	Ip6k1
Camk2g	9.32483e-35	1.13033	0.117	0.054	1.6766e-30	MHC-II+ ILC3	Camk2g
Tma7	9.45065e-35	0.319586	0.659	0.569	1.69923e-30	MHC-II+ ILC3	Tma7
Srf	1.05338e-34	1.34203	0.108	0.048	1.89397e-30	MHC-II+ ILC3	Srf
Akirin2	1.09206e-34	0.756738	0.233	0.149	1.96353e-30	MHC-II+ ILC3	Akirin2
Eif3i	1.29467e-34	0.41381	0.496	0.397	2.32782e-30	MHC-II+ ILC3	Eif3i
Tfdp2	1.31084e-34	1.14533	0.113	0.051	2.35688e-30	MHC-II+ ILC3	Tfdp2
Nek8	1.35517e-34	1.92603	0.063	0.017	2.4366e-30	MHC-II+ ILC3	Nek8
Mphosph10	1.43319e-34	0.872167	0.163	0.09	2.57687e-30	MHC-II+ ILC3	Mphosph10
Mrps6	1.4431e-34	0.678728	0.268	0.181	2.59469e-30	MHC-II+ ILC3	Mrps6
Add3	1.44622e-34	1.12382	0.134	0.068	2.60031e-30	MHC-II+ ILC3	Add3
Cnot6	1.57058e-34	0.50004	0.38	0.284	2.8239e-30	MHC-II+ ILC3	Cnot6
Ptpa	1.80228e-34	0.752366	0.199	0.12	3.24051e-30	MHC-II+ ILC3	Ptpa
Cfap20	1.91723e-34	0.971818	0.163	0.091	3.44718e-30	MHC-II+ ILC3	Cfap20
Vps36	1.97666e-34	0.80474	0.2	0.121	3.55403e-30	MHC-II+ ILC3	Vps36
Ripk2	2.04703e-34	1.19231	0.112	0.051	3.68055e-30	MHC-II+ ILC3	Ripk2
Denr	2.12121e-34	0.728048	0.21	0.129	3.81394e-30	MHC-II+ ILC3	Denr
Ube3a	2.81166e-34	0.705775	0.231	0.148	5.05537e-30	MHC-II+ ILC3	Ube3a
Zfp57	2.82638e-34	3.38646	0.039	0.003	5.08184e-30	MHC-II+ ILC3	Zfp57
Ccdc125	2.87262e-34	2.31474	0.052	0.01	5.16496e-30	MHC-II+ ILC3	Ccdc125
Zfp395	3.05681e-34	2.35917	0.051	0.01	5.49615e-30	MHC-II+ ILC3	Zfp395
Gpsm3	3.29482e-34	0.584508	0.31	0.218	5.92409e-30	MHC-II+ ILC3	Gpsm3
Slc52a2	3.54342e-34	1.20912	0.111	0.05	6.37108e-30	MHC-II+ ILC3	Slc52a2
Kmt2a	3.62268e-34	0.408289	0.38	0.279	6.51357e-30	MHC-II+ ILC3	Kmt2a
Tmem189	3.67799e-34	0.994545	0.149	0.08	6.61303e-30	MHC-II+ ILC3	Tmem189
Ewsr1	3.78222e-34	0.506363	0.363	0.268	6.80042e-30	MHC-II+ ILC3	Ewsr1
Mafk	3.95723e-34	1.30839	0.092	0.036	7.1151e-30	MHC-II+ ILC3	Mafk
Pnpo	4.3341e-34	1.45869	0.086	0.032	7.79271e-30	MHC-II+ ILC3	Pnpo
Zfp672	4.43054e-34	1.09768	0.112	0.051	7.96612e-30	MHC-II+ ILC3	Zfp672
Pole4	4.49003e-34	0.667449	0.258	0.172	8.07307e-30	MHC-II+ ILC3	Pole4
Pdia6	4.97912e-34	0.488028	0.325	0.23	8.95246e-30	MHC-II+ ILC3	Pdia6
Pstpip1	4.98801e-34	1.45936	0.09	0.036	8.96843e-30	MHC-II+ ILC3	Pstpip1
Phf20l1	5.59964e-34	0.622283	0.227	0.143	1.00681e-29	MHC-II+ ILC3	Phf20l1
Uck2	6.66597e-34	0.868402	0.234	0.154	1.19854e-29	MHC-II+ ILC3	Uck2
Trp53cor1	7.23014e-34	2.08569	0.056	0.013	1.29998e-29	MHC-II+ ILC3	Trp53cor1
Gimap1os	7.32224e-34	4.05088	0.036	0.002	1.31654e-29	MHC-II+ ILC3	Gimap1os
Rassf1	7.32787e-34	0.669591	0.29	0.203	1.31755e-29	MHC-II+ ILC3	Rassf1
5830411N06Rik	7.59802e-34	4.02198	0.041	0.005	1.36612e-29	MHC-II+ ILC3	5830411N06Rik
Ebna1bp2	7.75687e-34	0.725572	0.216	0.135	1.39469e-29	MHC-II+ ILC3	Ebna1bp2
Slc37a3	7.78885e-34	2.13369	0.054	0.012	1.40044e-29	MHC-II+ ILC3	Slc37a3
Mob4	1.1424e-33	0.595427	0.299	0.21	2.05403e-29	MHC-II+ ILC3	Mob4
Lman2	1.22329e-33	0.547322	0.341	0.249	2.19947e-29	MHC-II+ ILC3	Lman2
Hivep2	1.34865e-33	0.765646	0.15	0.079	2.42488e-29	MHC-II+ ILC3	Hivep2
Cxcr3	1.47547e-33	2.86709	0.048	0.009	2.65289e-29	MHC-II+ ILC3	Cxcr3
Arntl	1.7253e-33	1.24061	0.1	0.043	3.1021e-29	MHC-II+ ILC3	Arntl
Gm27162	1.76291e-33	3.76362	0.036	0.002	3.16971e-29	MHC-II+ ILC3	Gm27162
Lamtor2	1.82039e-33	0.602493	0.274	0.186	3.27306e-29	MHC-II+ ILC3	Lamtor2
Ndufv1	1.83228e-33	0.692438	0.236	0.154	3.29444e-29	MHC-II+ ILC3	Ndufv1
Lyrm9	1.89067e-33	2.83227	0.044	0.007	3.39943e-29	MHC-II+ ILC3	Lyrm9
Nfx1	2.0086e-33	0.805757	0.191	0.115	3.61147e-29	MHC-II+ ILC3	Nfx1
Qrfp	2.40223e-33	4.73255	0.033	0.001	4.3192e-29	MHC-II+ ILC3	Qrfp
4933424M12Rik	2.71163e-33	2.7363	0.044	0.007	4.87551e-29	MHC-II+ ILC3	4933424M12Rik
Rnf20	2.7945e-33	0.730451	0.198	0.12	5.02452e-29	MHC-II+ ILC3	Rnf20
Xkr6	2.91671e-33	3.00636	0.041	0.005	5.24424e-29	MHC-II+ ILC3	Xkr6
Slc30a9	3.7288e-33	0.923127	0.153	0.084	6.70438e-29	MHC-II+ ILC3	Slc30a9
Eif3k	4.08335e-33	0.308686	0.687	0.595	7.34187e-29	MHC-II+ ILC3	Eif3k
Cbx4	4.41351e-33	0.675252	0.187	0.11	7.93549e-29	MHC-II+ ILC3	Cbx4
Rpl28	4.53743e-33	0.128792	0.981	0.968	8.15829e-29	MHC-II+ ILC3	Rpl28
Impa1	4.63748e-33	0.818956	0.201	0.124	8.33818e-29	MHC-II+ ILC3	Impa1
2025-03-06	4.81521e-33	0.825714	0.173	0.1	8.65775e-29	MHC-II+ ILC3	2025-03-06
Chsy1	5.3235e-33	1.4802	0.079	0.028	9.57166e-29	MHC-II+ ILC3	Chsy1
Cenpq	5.73075e-33	1.29216	0.101	0.044	1.03039e-28	MHC-II+ ILC3	Cenpq
Fzd4	5.82024e-33	4.10947	0.034	0.002	1.04648e-28	MHC-II+ ILC3	Fzd4
Lta4h	5.99997e-33	0.629623	0.239	0.155	1.07879e-28	MHC-II+ ILC3	Lta4h
Dlat	6.03256e-33	1.22055	0.116	0.055	1.08465e-28	MHC-II+ ILC3	Dlat
Tmem50b	7.77631e-33	0.944871	0.149	0.081	1.39818e-28	MHC-II+ ILC3	Tmem50b
Ackr3	1.04524e-32	0.609796	0.082	0.03	1.87934e-28	MHC-II+ ILC3	Ackr3
Pcmtd2	1.1079e-32	1.16534	0.098	0.042	1.99201e-28	MHC-II+ ILC3	Pcmtd2
Jtb	1.16648e-32	0.639797	0.271	0.186	2.09733e-28	MHC-II+ ILC3	Jtb
BC005624	1.16959e-32	0.659892	0.255	0.172	2.10292e-28	MHC-II+ ILC3	BC005624
Coq2	1.22063e-32	1.08761	0.126	0.063	2.19469e-28	MHC-II+ ILC3	Coq2
Thbd	1.22662e-32	2.97861	0.04	0.005	2.20546e-28	MHC-II+ ILC3	Thbd
Mob2	1.32774e-32	0.893457	0.163	0.093	2.38728e-28	MHC-II+ ILC3	Mob2
B4galt1	1.35872e-32	0.996635	0.141	0.075	2.44298e-28	MHC-II+ ILC3	B4galt1
Tfpi	1.44437e-32	2.4383	0.048	0.009	2.59698e-28	MHC-II+ ILC3	Tfpi
Ralgds	1.73818e-32	1.22876	0.096	0.04	3.12525e-28	MHC-II+ ILC3	Ralgds
Pdia4	1.78778e-32	0.983109	0.137	0.072	3.21443e-28	MHC-II+ ILC3	Pdia4
Lingo2	1.81298e-32	1.80409	0.061	0.017	3.25974e-28	MHC-II+ ILC3	Lingo2
Pcca	1.91051e-32	1.42907	0.116	0.056	3.43509e-28	MHC-II+ ILC3	Pcca
Mrps5	2.0406e-32	1.15252	0.12	0.059	3.669e-28	MHC-II+ ILC3	Mrps5
Zdhhc8	2.08943e-32	1.36443	0.09	0.036	3.7568e-28	MHC-II+ ILC3	Zdhhc8
Mrps14	2.11879e-32	0.51937	0.342	0.252	3.80959e-28	MHC-II+ ILC3	Mrps14
Oxr1	2.26449e-32	0.986447	0.119	0.058	4.07155e-28	MHC-II+ ILC3	Oxr1
Wdr18	2.37181e-32	0.941246	0.145	0.078	4.26451e-28	MHC-II+ ILC3	Wdr18
Ppm1b	2.37803e-32	0.826584	0.171	0.099	4.27569e-28	MHC-II+ ILC3	Ppm1b
Oxnad1	2.83608e-32	2.1307	0.053	0.012	5.09927e-28	MHC-II+ ILC3	Oxnad1
Ctbp1	3.17088e-32	0.539242	0.303	0.214	5.70123e-28	MHC-II+ ILC3	Ctbp1
Sdha	3.2799e-32	0.505475	0.349	0.258	5.89725e-28	MHC-II+ ILC3	Sdha
Sec11a	3.57089e-32	0.528806	0.339	0.248	6.42047e-28	MHC-II+ ILC3	Sec11a
Fbxo33	3.69885e-32	0.871928	0.165	0.094	6.65053e-28	MHC-II+ ILC3	Fbxo33
Lrrfip1	4.78129e-32	0.358032	0.443	0.345	8.59676e-28	MHC-II+ ILC3	Lrrfip1
Tmem164	5.66304e-32	1.05385	0.114	0.054	1.01821e-27	MHC-II+ ILC3	Tmem164
Agtrap	5.69848e-32	1.06507	0.124	0.063	1.02459e-27	MHC-II+ ILC3	Agtrap
Ppp1ca	5.93897e-32	0.273372	0.741	0.673	1.06783e-27	MHC-II+ ILC3	Ppp1ca
Fam124b	5.94742e-32	3.48383	0.036	0.003	1.06935e-27	MHC-II+ ILC3	Fam124b
Emc7	6.25168e-32	0.593189	0.291	0.205	1.12405e-27	MHC-II+ ILC3	Emc7
Taf1	6.76469e-32	0.866251	0.175	0.104	1.21629e-27	MHC-II+ ILC3	Taf1
Mbnl2	7.37838e-32	0.643196	0.185	0.109	1.32663e-27	MHC-II+ ILC3	Mbnl2
Nsmf	8.35483e-32	1.44141	0.081	0.031	1.5022e-27	MHC-II+ ILC3	Nsmf
Ppan	8.43424e-32	0.981684	0.128	0.065	1.51648e-27	MHC-II+ ILC3	Ppan
Cdon	1.13139e-31	0.946273	0.144	0.078	2.03424e-27	MHC-II+ ILC3	Cdon
Kdsr	1.2136e-31	1.63206	0.069	0.023	2.18205e-27	MHC-II+ ILC3	Kdsr
Irgq	1.44084e-31	1.56502	0.067	0.022	2.59062e-27	MHC-II+ ILC3	Irgq
Cenpx	1.57694e-31	0.569751	0.313	0.226	2.83533e-27	MHC-II+ ILC3	Cenpx
Ptpra	1.69474e-31	0.531186	0.292	0.204	3.04715e-27	MHC-II+ ILC3	Ptpra
Gm26982	1.70252e-31	2.01627	0.056	0.015	3.06113e-27	MHC-II+ ILC3	Gm26982
Slc25a36	1.84984e-31	0.878387	0.143	0.077	3.32602e-27	MHC-II+ ILC3	Slc25a36
Igsf5	2.04602e-31	3.71041	0.034	0.002	3.67875e-27	MHC-II+ ILC3	Igsf5
Prss12	2.26115e-31	3.43443	0.036	0.003	4.06555e-27	MHC-II+ ILC3	Prss12
Numa1	2.31613e-31	0.592987	0.248	0.165	4.16439e-27	MHC-II+ ILC3	Numa1
Mri1	2.63039e-31	1.04752	0.128	0.066	4.72943e-27	MHC-II+ ILC3	Mri1
Xdh	2.92433e-31	2.24745	0.045	0.008	5.25795e-27	MHC-II+ ILC3	Xdh
Pfdn2	3.03783e-31	0.724912	0.209	0.133	5.46201e-27	MHC-II+ ILC3	Pfdn2
Fam107b	3.3081e-31	0.400166	0.466	0.367	5.94796e-27	MHC-II+ ILC3	Fam107b
Surf4	3.43118e-31	0.595248	0.309	0.224	6.16926e-27	MHC-II+ ILC3	Surf4
Blcap	3.45461e-31	1.04493	0.123	0.062	6.21139e-27	MHC-II+ ILC3	Blcap
Hdac1	3.62674e-31	0.496072	0.352	0.261	6.52088e-27	MHC-II+ ILC3	Hdac1
Peg13	3.88359e-31	1.09437	0.112	0.054	6.98269e-27	MHC-II+ ILC3	Peg13
Adssl1	4.46364e-31	1.62295	0.07	0.024	8.02563e-27	MHC-II+ ILC3	Adssl1
Usp25	5.66045e-31	0.612308	0.252	0.169	1.01775e-26	MHC-II+ ILC3	Usp25
Gprin3	6.13215e-31	3.08535	0.037	0.004	1.10256e-26	MHC-II+ ILC3	Gprin3
Srrd	6.20056e-31	0.822901	0.191	0.118	1.11486e-26	MHC-II+ ILC3	Srrd
Hhex	7.25049e-31	1.25825	0.095	0.042	1.30364e-26	MHC-II+ ILC3	Hhex
Gm14029	9.68261e-31	1.94073	0.052	0.013	1.74093e-26	MHC-II+ ILC3	Gm14029
Ifi47	1.07163e-30	0.984547	0.121	0.061	1.92679e-26	MHC-II+ ILC3	Ifi47
P2rx1	1.1306e-30	3.96357	0.033	0.002	2.03282e-26	MHC-II+ ILC3	P2rx1
Rexo2	1.27884e-30	0.614744	0.244	0.162	2.29935e-26	MHC-II+ ILC3	Rexo2
Flnb	1.31222e-30	0.627998	0.216	0.138	2.35937e-26	MHC-II+ ILC3	Flnb
Usp16	1.31787e-30	0.580885	0.27	0.186	2.36953e-26	MHC-II+ ILC3	Usp16
Ssna1	1.35581e-30	0.859066	0.206	0.133	2.43775e-26	MHC-II+ ILC3	Ssna1
Sil1	1.50416e-30	1.07157	0.111	0.053	2.70448e-26	MHC-II+ ILC3	Sil1
Ccnt1	1.55308e-30	0.5666	0.262	0.178	2.79243e-26	MHC-II+ ILC3	Ccnt1
Rapsn	1.59068e-30	2.98035	0.041	0.006	2.86004e-26	MHC-II+ ILC3	Rapsn
Tdrd9	1.5977e-30	3.64966	0.034	0.003	2.87266e-26	MHC-II+ ILC3	Tdrd9
Actn4	1.63536e-30	0.600624	0.269	0.187	2.94038e-26	MHC-II+ ILC3	Actn4
Snhg8	1.71972e-30	0.579057	0.258	0.176	3.09205e-26	MHC-II+ ILC3	Snhg8
Pfkl	1.77702e-30	0.946786	0.131	0.069	3.19508e-26	MHC-II+ ILC3	Pfkl
Epas1	1.8005e-30	2.54883	0.044	0.008	3.2373e-26	MHC-II+ ILC3	Epas1
Fam43a	1.83531e-30	2.89428	0.042	0.007	3.29989e-26	MHC-II+ ILC3	Fam43a
4930414F18Rik	1.95614e-30	2.70743	0.04	0.006	3.51713e-26	MHC-II+ ILC3	4930414F18Rik
Kbtbd11	2.48097e-30	1.76609	0.066	0.022	4.46078e-26	MHC-II+ ILC3	Kbtbd11
Mesd	2.55498e-30	1.18774	0.102	0.047	4.59386e-26	MHC-II+ ILC3	Mesd
Slc35e1	2.60056e-30	1.0023	0.124	0.063	4.67581e-26	MHC-II+ ILC3	Slc35e1
Smad4	2.90121e-30	0.467132	0.378	0.288	5.21638e-26	MHC-II+ ILC3	Smad4
Rbbp6	3.39441e-30	0.475102	0.329	0.24	6.10314e-26	MHC-II+ ILC3	Rbbp6
Kif5b	3.53276e-30	0.426477	0.454	0.363	6.3519e-26	MHC-II+ ILC3	Kif5b
Cox17	3.54386e-30	0.284952	0.524	0.425	6.37186e-26	MHC-II+ ILC3	Cox17
Lrrc8d	3.78836e-30	0.837965	0.148	0.082	6.81147e-26	MHC-II+ ILC3	Lrrc8d
Cyth3	3.83282e-30	0.966526	0.127	0.066	6.89141e-26	MHC-II+ ILC3	Cyth3
Gm36738	4.29541e-30	2.10145	0.051	0.012	7.72314e-26	MHC-II+ ILC3	Gm36738
Rpgrip1	4.89478e-30	1.97444	0.053	0.014	8.80081e-26	MHC-II+ ILC3	Rpgrip1
Snapc1	5.12478e-30	1.12663	0.114	0.056	9.21435e-26	MHC-II+ ILC3	Snapc1
Disp1	5.39407e-30	1.57448	0.067	0.023	9.69854e-26	MHC-II+ ILC3	Disp1
Anapc2	5.39465e-30	0.722526	0.221	0.145	9.69958e-26	MHC-II+ ILC3	Anapc2
Igtp	6.52565e-30	1.43076	0.105	0.05	1.17331e-25	MHC-II+ ILC3	Igtp
Mxd4	6.98914e-30	0.610291	0.212	0.136	1.25665e-25	MHC-II+ ILC3	Mxd4
Plekhf1	7.14054e-30	2.81671	0.04	0.006	1.28387e-25	MHC-II+ ILC3	Plekhf1
Tacstd2	7.16732e-30	2.50459	0.044	0.008	1.28868e-25	MHC-II+ ILC3	Tacstd2
Klf3	7.24693e-30	0.67167	0.196	0.122	1.303e-25	MHC-II+ ILC3	Klf3
Bet1	7.39192e-30	1.07068	0.125	0.066	1.32907e-25	MHC-II+ ILC3	Bet1
Ptbp3	8.64981e-30	0.444583	0.408	0.318	1.55524e-25	MHC-II+ ILC3	Ptbp3
Kdm5b	1.0907e-29	0.882593	0.14	0.077	1.96107e-25	MHC-II+ ILC3	Kdm5b
Synj2bp	1.13444e-29	0.954515	0.14	0.077	2.03973e-25	MHC-II+ ILC3	Synj2bp
8030451A03Rik	1.15621e-29	2.38793	0.042	0.007	2.07887e-25	MHC-II+ ILC3	8030451A03Rik
Srp72	1.2003e-29	0.537709	0.289	0.206	2.15813e-25	MHC-II+ ILC3	Srp72
Dnajb9	1.20232e-29	0.568213	0.257	0.175	2.16177e-25	MHC-II+ ILC3	Dnajb9
Olig2	1.73578e-29	3.73327	0.034	0.003	3.12094e-25	MHC-II+ ILC3	Olig2
Ly6a	1.92838e-29	1.40496	0.165	0.1	3.46723e-25	MHC-II+ ILC3	Ly6a
Cbx3	1.97392e-29	0.580744	0.263	0.182	3.54912e-25	MHC-II+ ILC3	Cbx3
Slc25a23	2.04086e-29	1.79993	0.058	0.017	3.66946e-25	MHC-II+ ILC3	Slc25a23
Serpina3f	2.22329e-29	2.45587	0.042	0.007	3.99747e-25	MHC-II+ ILC3	Serpina3f
Frmpd2	2.32186e-29	2.9525	0.036	0.004	4.17471e-25	MHC-II+ ILC3	Frmpd2
Rpp21	2.40312e-29	0.774676	0.188	0.118	4.3208e-25	MHC-II+ ILC3	Rpp21
Rbfa	2.55202e-29	1.06653	0.125	0.066	4.58854e-25	MHC-II+ ILC3	Rbfa
Flna	2.79752e-29	0.415924	0.436	0.343	5.02994e-25	MHC-II+ ILC3	Flna
Gbe1	2.8826e-29	1.17293	0.091	0.04	5.18292e-25	MHC-II+ ILC3	Gbe1
Csf2	3.20955e-29	3.16999	0.041	0.007	5.77077e-25	MHC-II+ ILC3	Csf2
Ube2a	3.38317e-29	0.56649	0.292	0.21	6.08294e-25	MHC-II+ ILC3	Ube2a
Pdcd4	3.49005e-29	0.459848	0.309	0.221	6.2751e-25	MHC-II+ ILC3	Pdcd4
Mrps21	3.59278e-29	0.527739	0.346	0.262	6.45982e-25	MHC-II+ ILC3	Mrps21
Psd4	3.63591e-29	0.660062	0.198	0.124	6.53737e-25	MHC-II+ ILC3	Psd4
Tnrc18	3.80424e-29	0.648436	0.198	0.124	6.84002e-25	MHC-II+ ILC3	Tnrc18
Nap1l4	4.37004e-29	0.558753	0.288	0.206	7.85734e-25	MHC-II+ ILC3	Nap1l4
Prpf6	4.51282e-29	0.632559	0.218	0.143	8.11405e-25	MHC-II+ ILC3	Prpf6
Tmem191c	4.53753e-29	1.91455	0.051	0.013	8.15848e-25	MHC-II+ ILC3	Tmem191c
Ndnf	4.68114e-29	0.700542	0.192	0.12	8.41668e-25	MHC-II+ ILC3	Ndnf
Pofut2	4.79269e-29	0.873836	0.154	0.09	8.61726e-25	MHC-II+ ILC3	Pofut2
Pigx	5.16845e-29	0.776496	0.172	0.104	9.29287e-25	MHC-II+ ILC3	Pigx
Rap1a	5.21207e-29	0.439261	0.434	0.348	9.3713e-25	MHC-II+ ILC3	Rap1a
Nop14	5.86551e-29	0.792957	0.179	0.11	1.05462e-24	MHC-II+ ILC3	Nop14
Cd320	6.16041e-29	1.51731	0.069	0.025	1.10764e-24	MHC-II+ ILC3	Cd320
Fbxo31	6.59964e-29	1.46884	0.075	0.029	1.18661e-24	MHC-II+ ILC3	Fbxo31
Prkx	6.61325e-29	0.725207	0.206	0.133	1.18906e-24	MHC-II+ ILC3	Prkx
Sorl1	6.76166e-29	0.751033	0.151	0.086	1.21575e-24	MHC-II+ ILC3	Sorl1
Kti12	6.85317e-29	1.09627	0.114	0.057	1.2322e-24	MHC-II+ ILC3	Kti12
Mdh2	6.8893e-29	0.1688	0.536	0.425	1.2387e-24	MHC-II+ ILC3	Mdh2
Rcbtb2	9.32908e-29	1.16846	0.091	0.04	1.67737e-24	MHC-II+ ILC3	Rcbtb2
Braf	1.01217e-28	0.800527	0.151	0.087	1.81989e-24	MHC-II+ ILC3	Braf
Ndst1	1.01298e-28	1.61627	0.063	0.021	1.82133e-24	MHC-II+ ILC3	Ndst1
Khdrbs3	1.06181e-28	3.51876	0.033	0.003	1.90914e-24	MHC-II+ ILC3	Khdrbs3
Casp4	1.10644e-28	0.678967	0.201	0.129	1.98938e-24	MHC-II+ ILC3	Casp4
Pcmtd1	1.14636e-28	0.627438	0.204	0.131	2.06116e-24	MHC-II+ ILC3	Pcmtd1
Stard10	1.45366e-28	0.998154	0.109	0.054	2.61368e-24	MHC-II+ ILC3	Stard10
Anp32e	1.57474e-28	0.495137	0.292	0.208	2.83138e-24	MHC-II+ ILC3	Anp32e
Fis1	1.6363e-28	0.3137	0.592	0.509	2.94207e-24	MHC-II+ ILC3	Fis1
Chd6	1.87549e-28	0.532257	0.236	0.157	3.37213e-24	MHC-II+ ILC3	Chd6
Gls2	2.11642e-28	1.42914	0.075	0.029	3.80532e-24	MHC-II+ ILC3	Gls2
Eif5	2.16924e-28	0.252828	0.592	0.489	3.90029e-24	MHC-II+ ILC3	Eif5
St6galnac2	2.27939e-28	1.52287	0.067	0.024	4.09834e-24	MHC-II+ ILC3	St6galnac2
Btaf1	2.30957e-28	0.503439	0.241	0.161	4.1526e-24	MHC-II+ ILC3	Btaf1
Hipk1	2.70172e-28	0.726967	0.184	0.115	4.85769e-24	MHC-II+ ILC3	Hipk1
Nucks1	2.70361e-28	0.375817	0.34	0.248	4.86108e-24	MHC-II+ ILC3	Nucks1
Ilvbl	2.929e-28	1.04215	0.107	0.053	5.26635e-24	MHC-II+ ILC3	Ilvbl
Pdk1	2.9569e-28	1.3844	0.071	0.027	5.3165e-24	MHC-II+ ILC3	Pdk1
Tcof1	3.07553e-28	1.07117	0.107	0.052	5.52981e-24	MHC-II+ ILC3	Tcof1
Fpgs	3.32762e-28	1.84983	0.054	0.015	5.98305e-24	MHC-II+ ILC3	Fpgs
2025-09-08	3.72187e-28	1.63488	0.063	0.021	6.69193e-24	MHC-II+ ILC3	2025-09-08
Tbcel	4.6961e-28	1.13044	0.094	0.043	8.44358e-24	MHC-II+ ILC3	Tbcel
2025-03-08	4.80479e-28	2.51195	0.04	0.007	8.63902e-24	MHC-II+ ILC3	2025-03-08
Best1	5.06782e-28	3.32787	0.033	0.003	9.11195e-24	MHC-II+ ILC3	Best1
Fkbp5	5.41107e-28	0.952786	0.119	0.062	9.72911e-24	MHC-II+ ILC3	Fkbp5
Lonp1	6.59843e-28	0.871249	0.131	0.072	1.1864e-23	MHC-II+ ILC3	Lonp1
Dxo	6.86623e-28	0.774727	0.179	0.112	1.23455e-23	MHC-II+ ILC3	Dxo
Cyp4f16	7.39278e-28	0.773022	0.134	0.073	1.32922e-23	MHC-II+ ILC3	Cyp4f16
Cry1	7.91413e-28	1.09842	0.095	0.044	1.42296e-23	MHC-II+ ILC3	Cry1
Gls	8.67114e-28	0.497583	0.311	0.229	1.55907e-23	MHC-II+ ILC3	Gls
Jun	9.2546e-28	0.201996	0.61	0.5	1.66398e-23	MHC-II+ ILC3	Jun
Tex30	1.00437e-27	0.890962	0.119	0.063	1.80586e-23	MHC-II+ ILC3	Tex30
Klhdc2	1.09441e-27	0.931492	0.132	0.073	1.96774e-23	MHC-II+ ILC3	Klhdc2
Spock2	1.11174e-27	2.26363	0.043	0.009	1.9989e-23	MHC-II+ ILC3	Spock2
Osbpl5	1.13763e-27	2.66604	0.038	0.006	2.04546e-23	MHC-II+ ILC3	Osbpl5
Gm10076	1.18991e-27	0.265898	0.733	0.695	2.13946e-23	MHC-II+ ILC3	Gm10076
Klhl6	1.28598e-27	1.30584	0.08	0.033	2.3122e-23	MHC-II+ ILC3	Klhl6
Arl13b	1.34278e-27	0.732579	0.159	0.094	2.41432e-23	MHC-II+ ILC3	Arl13b
Srgap2	1.37242e-27	0.590421	0.159	0.093	2.46762e-23	MHC-II+ ILC3	Srgap2
Sephs2	1.39698e-27	1.35986	0.078	0.032	2.51177e-23	MHC-II+ ILC3	Sephs2
Cnot7	1.50737e-27	0.712151	0.194	0.125	2.71025e-23	MHC-II+ ILC3	Cnot7
Atp11b	1.59024e-27	0.630156	0.218	0.145	2.85924e-23	MHC-II+ ILC3	Atp11b
Ddx46	2.10723e-27	0.484491	0.315	0.233	3.7888e-23	MHC-II+ ILC3	Ddx46
Hmgn5	2.12738e-27	1.36362	0.084	0.037	3.82502e-23	MHC-II+ ILC3	Hmgn5
Hdac5	2.14011e-27	0.873393	0.118	0.061	3.84792e-23	MHC-II+ ILC3	Hdac5
Gm41609	2.2135e-27	2.65482	0.034	0.004	3.97987e-23	MHC-II+ ILC3	Gm41609
Cd101	2.47681e-27	2.43962	0.037	0.006	4.4533e-23	MHC-II+ ILC3	Cd101
Blm	2.50211e-27	1.74545	0.056	0.018	4.49879e-23	MHC-II+ ILC3	Blm
Mpp7	3.07788e-27	0.770612	0.148	0.085	5.53403e-23	MHC-II+ ILC3	Mpp7
Kin	3.20817e-27	0.780394	0.159	0.095	5.76829e-23	MHC-II+ ILC3	Kin
Arhgap26.1	3.4157e-27	0.941511	0.092	0.042	6.14142e-23	MHC-II+ ILC3	Arhgap26.1
Lilr4b	3.70473e-27	0.410208	0.143	0.082	6.6611e-23	MHC-II+ ILC3	Lilr4b
Chchd2	3.88097e-27	0.135451	0.94	0.913	6.97798e-23	MHC-II+ ILC3	Chchd2
Fry	4.34583e-27	1.57036	0.055	0.017	7.8138e-23	MHC-II+ ILC3	Fry
Card6	5.09369e-27	2.49043	0.04	0.008	9.15846e-23	MHC-II+ ILC3	Card6
Setd7	5.50664e-27	0.863267	0.129	0.071	9.90094e-23	MHC-II+ ILC3	Setd7
H2afj	5.68715e-27	0.441299	0.398	0.314	1.02255e-22	MHC-II+ ILC3	H2afj
Gm50222	6.7317e-27	3.61259	0.03	0.003	1.21036e-22	MHC-II+ ILC3	Gm50222
Eef1akmt1	6.93341e-27	0.967349	0.125	0.068	1.24663e-22	MHC-II+ ILC3	Eef1akmt1
Tasp1	7.07991e-27	1.68068	0.058	0.019	1.27297e-22	MHC-II+ ILC3	Tasp1
Gm16201	8.80036e-27	0.849824	0.112	0.057	1.58231e-22	MHC-II+ ILC3	Gm16201
Zfand6	9.06613e-27	0.181552	0.664	0.564	1.63009e-22	MHC-II+ ILC3	Zfand6
Haus3	9.41858e-27	1.05793	0.1	0.049	1.69346e-22	MHC-II+ ILC3	Haus3
Tmx1	9.58532e-27	0.728574	0.179	0.113	1.72344e-22	MHC-II+ ILC3	Tmx1
Nedd9	9.97627e-27	1.01018	0.104	0.052	1.79373e-22	MHC-II+ ILC3	Nedd9
Lemd3	1.05397e-26	0.862915	0.131	0.073	1.89503e-22	MHC-II+ ILC3	Lemd3
Akt1	1.07213e-26	0.546849	0.294	0.217	1.9277e-22	MHC-II+ ILC3	Akt1
Hlf	1.12576e-26	2.27416	0.042	0.009	2.02412e-22	MHC-II+ ILC3	Hlf
Phb	1.2072e-26	0.727097	0.165	0.1	2.17055e-22	MHC-II+ ILC3	Phb
Camk2d	1.26546e-26	0.893981	0.11	0.056	2.27531e-22	MHC-II+ ILC3	Camk2d
Sytl1	1.36218e-26	2.89003	0.034	0.005	2.44921e-22	MHC-II+ ILC3	Sytl1
Usp37	1.43336e-26	0.943582	0.13	0.073	2.57718e-22	MHC-II+ ILC3	Usp37
Klhl12	1.43384e-26	2.1226	0.04	0.008	2.57804e-22	MHC-II+ ILC3	Klhl12
Cpd	1.74069e-26	1.36665	0.066	0.025	3.12977e-22	MHC-II+ ILC3	Cpd
Mrm1	1.76482e-26	1.80981	0.055	0.017	3.17315e-22	MHC-II+ ILC3	Mrm1
Trat1	1.86203e-26	2.36331	0.037	0.006	3.34793e-22	MHC-II+ ILC3	Trat1
Txn2	1.86929e-26	0.60281	0.222	0.15	3.36098e-22	MHC-II+ ILC3	Txn2
Rpl35a	1.97095e-26	0.10332	0.99	0.983	3.54376e-22	MHC-II+ ILC3	Rpl35a
Aldoa	2.00106e-26	0.130183	0.669	0.558	3.5979e-22	MHC-II+ ILC3	Aldoa
Rps25	2.05743e-26	0.115037	0.978	0.964	3.69925e-22	MHC-II+ ILC3	Rps25
Ndufa8	2.16632e-26	0.53934	0.25	0.174	3.89504e-22	MHC-II+ ILC3	Ndufa8
Pgam1	2.25207e-26	0.467989	0.314	0.233	4.04922e-22	MHC-II+ ILC3	Pgam1
Gm28177	2.68739e-26	1.88532	0.05	0.014	4.83193e-22	MHC-II+ ILC3	Gm28177
Ctps	3.35223e-26	1.613	0.061	0.022	6.02731e-22	MHC-II+ ILC3	Ctps
Rsad1	3.61079e-26	2.39178	0.041	0.009	6.4922e-22	MHC-II+ ILC3	Rsad1
AW011738	3.64823e-26	1.38176	0.07	0.028	6.55951e-22	MHC-II+ ILC3	AW011738
Atp5g1	3.96114e-26	0.330772	0.445	0.356	7.12214e-22	MHC-II+ ILC3	Atp5g1
Itgb5	3.96304e-26	1.26545	0.073	0.029	7.12554e-22	MHC-II+ ILC3	Itgb5
Abhd17a	3.99013e-26	0.633568	0.202	0.133	7.17425e-22	MHC-II+ ILC3	Abhd17a
Svil	4.18285e-26	1.00443	0.095	0.046	7.52076e-22	MHC-II+ ILC3	Svil
Prkcq	4.9006e-26	3.05075	0.03	0.003	8.81128e-22	MHC-II+ ILC3	Prkcq
AI854703	5.4014e-26	3.71536	0.029	0.002	9.71172e-22	MHC-II+ ILC3	AI854703
Mag	5.68581e-26	2.64409	0.033	0.004	1.02231e-21	MHC-II+ ILC3	Mag
Sigirr	5.87409e-26	0.908947	0.111	0.058	1.05616e-21	MHC-II+ ILC3	Sigirr
Pard3	7.67226e-26	2.8936	0.032	0.004	1.37947e-21	MHC-II+ ILC3	Pard3
Atxn10	7.75029e-26	0.408238	0.347	0.263	1.3935e-21	MHC-II+ ILC3	Atxn10
Mindy2	8.52038e-26	1.05311	0.092	0.044	1.53196e-21	MHC-II+ ILC3	Mindy2
Atxn7	8.9836e-26	0.565224	0.206	0.136	1.61525e-21	MHC-II+ ILC3	Atxn7
Ldlrad4	9.24388e-26	1.16481	0.077	0.032	1.66205e-21	MHC-II+ ILC3	Ldlrad4
Glo1	9.29747e-26	0.80395	0.149	0.089	1.67168e-21	MHC-II+ ILC3	Glo1
Dennd1b	1.15827e-25	0.751368	0.138	0.079	2.08256e-21	MHC-II+ ILC3	Dennd1b
Gpr34	1.20532e-25	2.737	0.035	0.006	2.16716e-21	MHC-II+ ILC3	Gpr34
Ywhaq	1.26498e-25	0.258848	0.566	0.47	2.27443e-21	MHC-II+ ILC3	Ywhaq
Sarnp	1.388e-25	0.42066	0.391	0.31	2.49563e-21	MHC-II+ ILC3	Sarnp
Rbm18	1.5246e-25	1.00444	0.108	0.056	2.74123e-21	MHC-II+ ILC3	Rbm18
Tbl1xr1	1.55755e-25	0.701422	0.177	0.112	2.80048e-21	MHC-II+ ILC3	Tbl1xr1
Sf3b2	1.66639e-25	0.316792	0.542	0.458	2.99616e-21	MHC-II+ ILC3	Sf3b2
Rab11b	1.67869e-25	0.413335	0.399	0.319	3.01828e-21	MHC-II+ ILC3	Rab11b
Kdm7a	1.70801e-25	0.584333	0.221	0.15	3.071e-21	MHC-II+ ILC3	Kdm7a
Scrt1	2.36335e-25	3.89666	0.027	0.002	4.2493e-21	MHC-II+ ILC3	Scrt1
Cisd3	2.4116e-25	1.10925	0.094	0.046	4.33606e-21	MHC-II+ ILC3	Cisd3
Rab4a	2.52764e-25	3.09898	0.03	0.003	4.54469e-21	MHC-II+ ILC3	Rab4a
Araf	2.92741e-25	0.541032	0.239	0.166	5.26348e-21	MHC-II+ ILC3	Araf
Nup50	2.92887e-25	0.702282	0.173	0.109	5.26611e-21	MHC-II+ ILC3	Nup50
Gnl3l	3.00953e-25	1.04541	0.098	0.049	5.41113e-21	MHC-II+ ILC3	Gnl3l
Ik	3.80419e-25	0.385705	0.388	0.304	6.83994e-21	MHC-II+ ILC3	Ik
Rev3l	4.33898e-25	0.738705	0.139	0.081	7.80149e-21	MHC-II+ ILC3	Rev3l
Bud23	4.50423e-25	0.881783	0.136	0.08	8.0986e-21	MHC-II+ ILC3	Bud23
Vamp2	5.9091e-25	0.74197	0.164	0.102	1.06246e-20	MHC-II+ ILC3	Vamp2
Lgals8	5.99647e-25	1.06986	0.088	0.041	1.07817e-20	MHC-II+ ILC3	Lgals8
Slc25a53	6.03952e-25	1.8994	0.043	0.011	1.08591e-20	MHC-II+ ILC3	Slc25a53
Rab6b	6.37761e-25	1.36067	0.065	0.025	1.14669e-20	MHC-II+ ILC3	Rab6b
Myo3b	8.14497e-25	2.25206	0.036	0.007	1.46447e-20	MHC-II+ ILC3	Myo3b
Ppp2r2a	8.57721e-25	0.552594	0.235	0.163	1.54218e-20	MHC-II+ ILC3	Ppp2r2a
Armc3	9.21615e-25	2.60269	0.034	0.006	1.65706e-20	MHC-II+ ILC3	Armc3
Ubxn4	1.32376e-24	0.304449	0.447	0.361	2.38013e-20	MHC-II+ ILC3	Ubxn4
Mtf2	1.36728e-24	0.670916	0.171	0.108	2.45838e-20	MHC-II+ ILC3	Mtf2
Maml3	1.388e-24	0.892007	0.094	0.046	2.49562e-20	MHC-II+ ILC3	Maml3
Ext2	1.4961e-24	0.863637	0.123	0.069	2.68999e-20	MHC-II+ ILC3	Ext2
Alg5	1.50455e-24	0.889321	0.128	0.074	2.70519e-20	MHC-II+ ILC3	Alg5
Snap47	1.57468e-24	1.10467	0.086	0.04	2.83127e-20	MHC-II+ ILC3	Snap47
Adpgk	1.61047e-24	1.36906	0.065	0.025	2.89563e-20	MHC-II+ ILC3	Adpgk
Zswim6	1.85219e-24	0.831908	0.114	0.061	3.33024e-20	MHC-II+ ILC3	Zswim6
Tpbgl	1.86884e-24	4.39898	0.025	0.001	3.36017e-20	MHC-II+ ILC3	Tpbgl
Bag5	1.90661e-24	0.936589	0.11	0.059	3.42809e-20	MHC-II+ ILC3	Bag5
Cdkn1b	1.92472e-24	0.561509	0.27	0.198	3.46065e-20	MHC-II+ ILC3	Cdkn1b
Ncor2	2.11649e-24	0.505588	0.255	0.182	3.80545e-20	MHC-II+ ILC3	Ncor2
Slain1	2.2244e-24	1.49363	0.058	0.021	3.99947e-20	MHC-II+ ILC3	Slain1
Fbl	2.73621e-24	0.462669	0.237	0.164	4.9197e-20	MHC-II+ ILC3	Fbl
Panx1	2.84155e-24	0.944324	0.115	0.063	5.1091e-20	MHC-II+ ILC3	Panx1
Gm21887	2.99904e-24	0.628675	0.163	0.101	5.39227e-20	MHC-II+ ILC3	Gm21887
Parp1	3.4046e-24	0.637401	0.201	0.136	6.12146e-20	MHC-II+ ILC3	Parp1
Rpl22l1	3.53722e-24	0.214885	0.717	0.64	6.35992e-20	MHC-II+ ILC3	Rpl22l1
Fam160a2	4.02384e-24	1.94385	0.041	0.01	7.23486e-20	MHC-II+ ILC3	Fam160a2
Wdr61	4.03426e-24	0.668905	0.189	0.125	7.2536e-20	MHC-II+ ILC3	Wdr61
Serf1	4.44338e-24	1.45918	0.066	0.027	7.9892e-20	MHC-II+ ILC3	Serf1
Olfr60	4.45741e-24	2.30583	0.035	0.007	8.01442e-20	MHC-II+ ILC3	Olfr60
Dnah7a	4.90512e-24	1.73472	0.045	0.013	8.81941e-20	MHC-II+ ILC3	Dnah7a
Hsdl2	4.91761e-24	0.817945	0.131	0.076	8.84186e-20	MHC-II+ ILC3	Hsdl2
Mapk12	5.05447e-24	3.71487	0.026	0.002	9.08794e-20	MHC-II+ ILC3	Mapk12
Napa	5.10305e-24	0.468679	0.305	0.23	9.17528e-20	MHC-II+ ILC3	Napa
CAAA01118383.1	5.2508e-24	0.605443	0.219	0.151	9.44094e-20	MHC-II+ ILC3	CAAA01118383.1
Mknk2	5.70307e-24	0.414446	0.361	0.282	1.02541e-19	MHC-II+ ILC3	Mknk2
Dok3	6.78084e-24	1.53303	0.055	0.019	1.2192e-19	MHC-II+ ILC3	Dok3
Fam83a	7.39351e-24	3.45923	0.027	0.002	1.32935e-19	MHC-II+ ILC3	Fam83a
Cdkn1c	7.9507e-24	2.14024	0.04	0.01	1.42954e-19	MHC-II+ ILC3	Cdkn1c
Ahdc1	8.28794e-24	1.9328	0.042	0.011	1.49017e-19	MHC-II+ ILC3	Ahdc1
Oip5os1	9.94197e-24	0.594454	0.229	0.161	1.78757e-19	MHC-II+ ILC3	Oip5os1
Klrg1	1.016e-23	1.77346	0.035	0.007	1.82677e-19	MHC-II+ ILC3	Klrg1
Itgb3bp	1.05322e-23	1.28647	0.065	0.026	1.8937e-19	MHC-II+ ILC3	Itgb3bp
Acin1	1.07351e-23	0.345997	0.421	0.339	1.93016e-19	MHC-II+ ILC3	Acin1
Arid4a	1.36794e-23	0.451987	0.365	0.29	2.45955e-19	MHC-II+ ILC3	Arid4a
Secisbp2l	1.38718e-23	0.666261	0.183	0.12	2.49415e-19	MHC-II+ ILC3	Secisbp2l
Tcn2	1.4969e-23	0.678771	0.132	0.076	2.69142e-19	MHC-II+ ILC3	Tcn2
Rdm1	1.50061e-23	0.711477	0.192	0.129	2.6981e-19	MHC-II+ ILC3	Rdm1
Imp3	1.53119e-23	0.580888	0.253	0.184	2.75308e-19	MHC-II+ ILC3	Imp3
Ide	1.55979e-23	0.66272	0.176	0.114	2.80449e-19	MHC-II+ ILC3	Ide
Plk4	1.57712e-23	1.02591	0.105	0.057	2.83567e-19	MHC-II+ ILC3	Plk4
Rab3d	1.59441e-23	1.45089	0.058	0.021	2.86674e-19	MHC-II+ ILC3	Rab3d
Mrpl51	1.62126e-23	0.641541	0.205	0.14	2.91502e-19	MHC-II+ ILC3	Mrpl51
Dhrs7	1.62301e-23	0.928466	0.11	0.06	2.91817e-19	MHC-II+ ILC3	Dhrs7
Pdlim1	1.63355e-23	2.07436	0.048	0.015	2.93712e-19	MHC-II+ ILC3	Pdlim1
Ndufb6	1.64995e-23	0.481734	0.324	0.249	2.96661e-19	MHC-II+ ILC3	Ndufb6
Os9	1.78402e-23	0.348568	0.405	0.323	3.20767e-19	MHC-II+ ILC3	Os9
Stag2	1.88964e-23	0.464357	0.3	0.226	3.39757e-19	MHC-II+ ILC3	Stag2
Syvn1	2.09062e-23	0.859054	0.11	0.06	3.75893e-19	MHC-II+ ILC3	Syvn1
Kif23	2.20039e-23	1.47815	0.06	0.023	3.95629e-19	MHC-II+ ILC3	Kif23
F13a1	2.27124e-23	3.20736	0.026	0.002	4.08368e-19	MHC-II+ ILC3	F13a1
Hells	2.40969e-23	1.01096	0.093	0.047	4.33262e-19	MHC-II+ ILC3	Hells
Cbx7	2.52495e-23	0.676803	0.157	0.098	4.53986e-19	MHC-II+ ILC3	Cbx7
Arhgap9	2.67429e-23	0.928409	0.105	0.056	4.80838e-19	MHC-II+ ILC3	Arhgap9
Ranbp1	2.93226e-23	0.274417	0.364	0.279	5.2722e-19	MHC-II+ ILC3	Ranbp1
Ahsa1	2.94568e-23	0.523706	0.255	0.184	5.29634e-19	MHC-II+ ILC3	Ahsa1
Zfp91.1	3.32404e-23	0.825638	0.123	0.071	5.97662e-19	MHC-II+ ILC3	Zfp91.1
Abcf3	3.41927e-23	0.872885	0.11	0.06	6.14786e-19	MHC-II+ ILC3	Abcf3
Ergic3	3.7784e-23	0.435265	0.314	0.239	6.79356e-19	MHC-II+ ILC3	Ergic3
Kiz	4.02015e-23	1.51388	0.056	0.02	7.22824e-19	MHC-II+ ILC3	Kiz
Abcg2	4.22313e-23	1.96748	0.039	0.01	7.59318e-19	MHC-II+ ILC3	Abcg2
Strap	4.22621e-23	0.52352	0.257	0.187	7.59872e-19	MHC-II+ ILC3	Strap
Ppard	4.26453e-23	1.07944	0.088	0.043	7.66762e-19	MHC-II+ ILC3	Ppard
Bcas2	4.71474e-23	0.567075	0.24	0.172	8.4771e-19	MHC-II+ ILC3	Bcas2
Zbtb4	4.84109e-23	1.02396	0.083	0.04	8.70429e-19	MHC-II+ ILC3	Zbtb4
Ccr4	4.9562e-23	4.39178	0.023	0.001	8.91125e-19	MHC-II+ ILC3	Ccr4
Slc12a6	5.10934e-23	1.25753	0.066	0.027	9.1866e-19	MHC-II+ ILC3	Slc12a6
Hyou1	5.12574e-23	1.03077	0.1	0.053	9.21608e-19	MHC-II+ ILC3	Hyou1
Dnajc25	5.13257e-23	1.33664	0.068	0.029	9.22836e-19	MHC-II+ ILC3	Dnajc25
Ppp1r15b	5.36704e-23	0.551763	0.211	0.145	9.64993e-19	MHC-II+ ILC3	Ppp1r15b
Cd79b	5.44414e-23	0.683845	0.172	0.112	9.78857e-19	MHC-II+ ILC3	Cd79b
Rb1cc1	5.6275e-23	0.579388	0.183	0.12	1.01182e-18	MHC-II+ ILC3	Rb1cc1
Gm41386	5.98441e-23	3.82474	0.023	0.001	1.076e-18	MHC-II+ ILC3	Gm41386
Gna15	6.81886e-23	1.77373	0.045	0.013	1.22603e-18	MHC-II+ ILC3	Gna15
Cpq	6.91178e-23	0.599283	0.148	0.091	1.24274e-18	MHC-II+ ILC3	Cpq
Fam173a	7.71959e-23	0.985633	0.095	0.049	1.38798e-18	MHC-II+ ILC3	Fam173a
Pde3b	7.78359e-23	0.729105	0.107	0.058	1.39949e-18	MHC-II+ ILC3	Pde3b
Pex16	7.88347e-23	0.572665	0.214	0.148	1.41745e-18	MHC-II+ ILC3	Pex16
Gpbp1	7.89985e-23	0.344914	0.407	0.325	1.42039e-18	MHC-II+ ILC3	Gpbp1
Slc15a2	7.94667e-23	1.02219	0.091	0.046	1.42881e-18	MHC-II+ ILC3	Slc15a2
Ndufb5	8.08652e-23	0.388211	0.406	0.329	1.45396e-18	MHC-II+ ILC3	Ndufb5
Myo16	8.38293e-23	2.59162	0.031	0.005	1.50725e-18	MHC-II+ ILC3	Myo16
Polr3d	8.46324e-23	1.21707	0.073	0.033	1.52169e-18	MHC-II+ ILC3	Polr3d
Cast	8.58903e-23	0.50916	0.238	0.169	1.54431e-18	MHC-II+ ILC3	Cast
Cnn3	8.69116e-23	1.20506	0.108	0.06	1.56267e-18	MHC-II+ ILC3	Cnn3
Macrod1	1.01408e-22	2.58082	0.03	0.005	1.82332e-18	MHC-II+ ILC3	Macrod1
Med25	1.03748e-22	0.716865	0.139	0.084	1.86539e-18	MHC-II+ ILC3	Med25
Arid4b	1.06002e-22	0.410095	0.327	0.249	1.90591e-18	MHC-II+ ILC3	Arid4b
Samm50	1.10756e-22	0.61954	0.209	0.145	1.99139e-18	MHC-II+ ILC3	Samm50
Imp4	1.16947e-22	0.689559	0.164	0.105	2.1027e-18	MHC-II+ ILC3	Imp4
Eaf1	1.29664e-22	1.0976	0.084	0.041	2.33136e-18	MHC-II+ ILC3	Eaf1
Rps6kb1	1.40009e-22	0.6225	0.173	0.112	2.51736e-18	MHC-II+ ILC3	Rps6kb1
Entpd5	1.45012e-22	1.80705	0.042	0.012	2.60732e-18	MHC-II+ ILC3	Entpd5
Rgs16	1.50212e-22	3.66381	0.025	0.002	2.70082e-18	MHC-II+ ILC3	Rgs16
Hmg20a	1.61452e-22	0.797586	0.12	0.069	2.9029e-18	MHC-II+ ILC3	Hmg20a
Man1c1	1.63163e-22	1.3896	0.055	0.02	2.93368e-18	MHC-II+ ILC3	Man1c1
Pigp	1.6629e-22	0.61494	0.214	0.15	2.98989e-18	MHC-II+ ILC3	Pigp
Dnaja4	1.76733e-22	1.90908	0.04	0.01	3.17766e-18	MHC-II+ ILC3	Dnaja4
Gm26759	1.86692e-22	2.23457	0.032	0.006	3.35673e-18	MHC-II+ ILC3	Gm26759
Trappc6a	1.86705e-22	0.555507	0.226	0.159	3.35696e-18	MHC-II+ ILC3	Trappc6a
Klk8	2.08301e-22	1.09482	0.078	0.037	3.74526e-18	MHC-II+ ILC3	Klk8
Atp5mpl	2.20058e-22	0.288539	0.56	0.484	3.95664e-18	MHC-II+ ILC3	Atp5mpl
Cct3	2.33042e-22	0.322558	0.383	0.3	4.19009e-18	MHC-II+ ILC3	Cct3
Gnl1	2.36591e-22	0.807595	0.131	0.078	4.25391e-18	MHC-II+ ILC3	Gnl1
Prpf19	2.37406e-22	0.659366	0.169	0.11	4.26856e-18	MHC-II+ ILC3	Prpf19
Usp9x	2.43063e-22	0.445211	0.279	0.206	4.37027e-18	MHC-II+ ILC3	Usp9x
Gm33332	2.50267e-22	2.8986	0.029	0.004	4.4998e-18	MHC-II+ ILC3	Gm33332
Nudt18	2.65718e-22	1.0429	0.082	0.039	4.77761e-18	MHC-II+ ILC3	Nudt18
Emg1	2.87105e-22	0.555619	0.232	0.165	5.16215e-18	MHC-II+ ILC3	Emg1
Hs2st1	2.95131e-22	1.01471	0.086	0.043	5.30645e-18	MHC-II+ ILC3	Hs2st1
Sp4	3.093e-22	0.913274	0.094	0.048	5.56122e-18	MHC-II+ ILC3	Sp4
Mtdh	3.11439e-22	0.329843	0.438	0.358	5.59968e-18	MHC-II+ ILC3	Mtdh
Cyth4	3.12431e-22	0.329212	0.206	0.138	5.61751e-18	MHC-II+ ILC3	Cyth4
Mid1ip1	3.61954e-22	1.16036	0.1	0.054	6.50794e-18	MHC-II+ ILC3	Mid1ip1
Efr3a	4.01904e-22	0.538291	0.219	0.153	7.22623e-18	MHC-II+ ILC3	Efr3a
Hars	4.16887e-22	0.696198	0.162	0.105	7.49563e-18	MHC-II+ ILC3	Hars
Endog	4.22924e-22	1.38257	0.061	0.025	7.60417e-18	MHC-II+ ILC3	Endog
Inpp5d	4.33393e-22	0.367368	0.247	0.176	7.79241e-18	MHC-II+ ILC3	Inpp5d
Cnot6l	5.00169e-22	0.453975	0.265	0.193	8.99305e-18	MHC-II+ ILC3	Cnot6l
4930532G15Rik	5.13339e-22	1.84927	0.043	0.012	9.22984e-18	MHC-II+ ILC3	4930532G15Rik
Kdm2b	5.32516e-22	0.417644	0.341	0.265	9.57464e-18	MHC-II+ ILC3	Kdm2b
Grb10	5.32912e-22	3.75915	0.023	0.002	9.58176e-18	MHC-II+ ILC3	Grb10
Ss18l2	5.50187e-22	1.1536	0.083	0.041	9.89236e-18	MHC-II+ ILC3	Ss18l2
Fkbp8	5.70808e-22	0.335197	0.457	0.381	1.02631e-17	MHC-II+ ILC3	Fkbp8
Slc4a7	5.72786e-22	1.06182	0.082	0.04	1.02987e-17	MHC-II+ ILC3	Slc4a7
1200007C13Rik	6.04184e-22	3.78502	0.022	0.001	1.08632e-17	MHC-II+ ILC3	1200007C13Rik
Srgap3	6.41143e-22	0.765982	0.115	0.065	1.15277e-17	MHC-II+ ILC3	Srgap3
Paqr5	6.56164e-22	3.21409	0.026	0.003	1.17978e-17	MHC-II+ ILC3	Paqr5
Cdca4	6.59673e-22	0.897001	0.108	0.06	1.18609e-17	MHC-II+ ILC3	Cdca4
Smc3	6.95511e-22	0.531054	0.248	0.181	1.25053e-17	MHC-II+ ILC3	Smc3
Fmc1	7.01765e-22	0.841304	0.114	0.065	1.26177e-17	MHC-II+ ILC3	Fmc1
Btd	7.13333e-22	1.07302	0.074	0.034	1.28257e-17	MHC-II+ ILC3	Btd
Helz2	7.31246e-22	0.540731	0.185	0.124	1.31478e-17	MHC-II+ ILC3	Helz2
Tmem156	8.62816e-22	1.74051	0.042	0.012	1.55134e-17	MHC-II+ ILC3	Tmem156
Vasp	9.00814e-22	0.361537	0.336	0.259	1.61966e-17	MHC-II+ ILC3	Vasp
Smap1	9.04041e-22	0.49586	0.285	0.216	1.62546e-17	MHC-II+ ILC3	Smap1
Slc16a6	9.25419e-22	1.13273	0.081	0.04	1.6639e-17	MHC-II+ ILC3	Slc16a6
Tspyl2	9.44063e-22	0.880077	0.107	0.059	1.69743e-17	MHC-II+ ILC3	Tspyl2
Dbf4	9.66676e-22	1.05222	0.092	0.048	1.73808e-17	MHC-II+ ILC3	Dbf4
Tmx4	9.96837e-22	1.24324	0.062	0.026	1.79231e-17	MHC-II+ ILC3	Tmx4
Mrps15	1.01914e-21	0.537517	0.23	0.164	1.83241e-17	MHC-II+ ILC3	Mrps15
Dhx9	1.02291e-21	0.480981	0.272	0.202	1.8392e-17	MHC-II+ ILC3	Dhx9
Zbtb2	1.05581e-21	1.03491	0.08	0.039	1.89834e-17	MHC-II+ ILC3	Zbtb2
Tbc1d17	1.09903e-21	0.868787	0.11	0.062	1.97605e-17	MHC-II+ ILC3	Tbc1d17
Stambpl1	1.19793e-21	1.99514	0.039	0.01	2.15388e-17	MHC-II+ ILC3	Stambpl1
Opa3	1.23797e-21	0.832756	0.121	0.071	2.22587e-17	MHC-II+ ILC3	Opa3
Gde1	1.37397e-21	0.885927	0.102	0.056	2.4704e-17	MHC-II+ ILC3	Gde1
Stx11	1.38279e-21	0.396119	0.303	0.23	2.48625e-17	MHC-II+ ILC3	Stx11
Rgs14	1.53866e-21	1.66249	0.046	0.015	2.76652e-17	MHC-II+ ILC3	Rgs14
Sppl2b	1.60109e-21	1.04449	0.086	0.043	2.87876e-17	MHC-II+ ILC3	Sppl2b
Bcr	1.60848e-21	1.0605	0.071	0.032	2.89206e-17	MHC-II+ ILC3	Bcr
Sipa1	1.64358e-21	0.870391	0.106	0.059	2.95516e-17	MHC-II+ ILC3	Sipa1
Adcy3	1.8627e-21	2.03585	0.035	0.008	3.34914e-17	MHC-II+ ILC3	Adcy3
Cul3	2.03282e-21	0.478587	0.28	0.212	3.65501e-17	MHC-II+ ILC3	Cul3
Gmds	2.37571e-21	1.29332	0.06	0.024	4.27153e-17	MHC-II+ ILC3	Gmds
Paip2b	2.73408e-21	1.13902	0.07	0.032	4.91588e-17	MHC-II+ ILC3	Paip2b
[truncated: 24,089 more rows]
