# Supplementary material for: RORγt+ APCs require a distinct cis-regulatory element to instruct tolerance to dietary antigens
Source: Research Square preprint supplement (doi:10.21203/rs.3.rs-4865841/v1), 2025-08-01
Supplement: Supplementary file 7 [file ea5c7338511d88e8828abaa0.xlsx]

## Sheet: Table 1A. 6-week-old ILC DEG
	p_val	avg_log2FC	pct.1	pct.2	p_val_adj	cluster	gene
Hs3st1	0	7.37321	0.942	0.029	0	ILC2	Hs3st1
Il17rb	0	6.61883	0.813	0.019	0	ILC2	Il17rb
Ptpn13	0	5.46865	0.693	0.034	0	ILC2	Ptpn13
Gata3	0	4.06215	0.742	0.084	0	ILC2	Gata3
Calca	0	6.50214	0.649	0.027	0	ILC2	Calca
Tspan13	0	2.75939	0.914	0.296	0	ILC2	Tspan13
Neb	0	6.30548	0.614	0.019	0	ILC2	Neb
Klrg1	0	5.04725	0.583	0.027	0	ILC2	Klrg1
Il4	0	5.77763	0.568	0.017	0	ILC2	Il4
Bzw2	0	2.55906	0.729	0.179	0	ILC2	Bzw2
Itk	0	2.10117	0.824	0.313	0	ILC2	Itk
Paxbp1	0	2.78372	0.637	0.146	0	ILC2	Paxbp1
Inpp4b	0	3.07617	0.566	0.085	0	ILC2	Inpp4b
Ly6a	0	4.25727	0.504	0.036	0	ILC2	Ly6a
Spcs3	0	2.72019	0.591	0.123	0	ILC2	Spcs3
Tnfrsf18	0	2.0315	0.745	0.285	0	ILC2	Tnfrsf18
Fyb	0	2.26659	0.611	0.16	0	ILC2	Fyb
Nr3c1	0	1.7834	0.859	0.411	0	ILC2	Nr3c1
Areg	0	3.26504	0.521	0.074	0	ILC2	Areg
Deptor	0	4.03443	0.484	0.038	0	ILC2	Deptor
Epas1	0	1.99716	0.708	0.262	0	ILC2	Epas1
Hes1	0	3.27223	0.55	0.109	0	ILC2	Hes1
Otulinl	0	2.77182	0.531	0.108	0	ILC2	Otulinl
Ets2	0	3.33632	0.482	0.064	0	ILC2	Ets2
Enpp4	0	2.91137	0.498	0.092	0	ILC2	Enpp4
Dusp10	0	2.43585	0.565	0.163	0	ILC2	Dusp10
Rnf128	0	3.33273	0.474	0.08	0	ILC2	Rnf128
Serp1	0	1.57425	0.812	0.429	0	ILC2	Serp1
Gcnt1	0	3.38597	0.436	0.055	0	ILC2	Gcnt1
Aff4	0	1.52956	0.755	0.375	0	ILC2	Aff4
Chd7	0	2.19792	0.528	0.154	0	ILC2	Chd7
Ipmk	0	3.39335	0.423	0.054	0	ILC2	Ipmk
Lilr4b	0	1.5817	0.526	0.16	0	ILC2	Lilr4b
Elovl5	0	1.74597	0.623	0.258	0	ILC2	Elovl5
Gpr65	0	1.45008	0.742	0.378	0	ILC2	Gpr65
Rab4a	0	3.35484	0.407	0.048	0	ILC2	Rab4a
Abhd17c	0	2.49034	0.452	0.102	0	ILC2	Abhd17c
Socs2	0	1.61772	0.544	0.199	0	ILC2	Socs2
Trbc1	0	1.03911	0.754	0.411	0	ILC2	Trbc1
Elf1	0	1.67513	0.795	0.452	0	ILC2	Elf1
Slain1	0	2.85319	0.426	0.084	0	ILC2	Slain1
Nfkb1	0	1.63098	0.899	0.572	0	ILC2	Nfkb1
Zrsr1	0	2.31527	0.453	0.126	0	ILC2	Zrsr1
Cyp51	0	2.05889	0.472	0.147	0	ILC2	Cyp51
Stk4	0	1.57226	0.545	0.227	0	ILC2	Stk4
Sp110	0	1.62397	0.497	0.186	0	ILC2	Sp110
Ell2	0	1.25023	0.646	0.336	0	ILC2	Ell2
Lmo4	0	1.98191	0.968	0.659	0	ILC2	Lmo4
Jak2	0	1.39454	0.582	0.274	0	ILC2	Jak2
Irf2bp2	0	2.18079	0.416	0.109	0	ILC2	Irf2bp2
4930523C07Rik	0	1.25991	0.689	0.386	0	ILC2	4930523C07Rik
Ldha	0	1.37004	0.729	0.428	0	ILC2	Ldha
Tgm2	0	3.11171	0.36	0.06	0	ILC2	Tgm2
Spty2d1	0	1.68549	0.744	0.445	0	ILC2	Spty2d1
Ifnar1	0	2.15795	0.403	0.106	0	ILC2	Ifnar1
Cysltr1	0	2.80912	0.351	0.056	0	ILC2	Cysltr1
Gm40271	0	1.19928	0.608	0.313	0	ILC2	Gm40271
Ikzf3	0	1.10853	0.665	0.375	0	ILC2	Ikzf3
Rad51b	0	3.48075	0.322	0.033	0	ILC2	Rad51b
Gm20186	0	1.41284	0.739	0.45	0	ILC2	Gm20186
Taldo1	0	1.16332	0.617	0.328	0	ILC2	Taldo1
Samhd1	0	1.41353	0.538	0.25	0	ILC2	Samhd1
Cd200r1	0	2.67999	0.347	0.065	0	ILC2	Cd200r1
Dennd5a	0	2.50441	0.349	0.069	0	ILC2	Dennd5a
Pdlim1	0	4.4845	0.297	0.018	0	ILC2	Pdlim1
Cd27	0	3.79254	0.302	0.025	0	ILC2	Cd27
Glb1	0	2.50786	0.351	0.074	0	ILC2	Glb1
Ret	0	2.03603	0.376	0.101	0	ILC2	Ret
Tmem64	0	1.10723	0.655	0.381	0	ILC2	Tmem64
Basp1	0	1.86355	0.462	0.188	0	ILC2	Basp1
Igsf5	0	2.05353	0.382	0.109	0	ILC2	Igsf5
Gpx4	0	1.11203	0.823	0.55	0	ILC2	Gpx4
Eef1g	0	0.937897	0.76	0.489	0	ILC2	Eef1g
Rpl36a	0	1.40989	0.957	0.691	0	ILC2	Rpl36a
Gas5	0	0.962758	0.858	0.599	0	ILC2	Gas5
Slc7a8	0	6.23464	0.258	0.004	0	ILC2	Slc7a8
Klf4	0	1.10804	0.772	0.521	0	ILC2	Klf4
Ccr4	0	5.9311	0.248	0.005	0	ILC2	Ccr4
Eef1b2	0	0.982602	0.859	0.617	0	ILC2	Eef1b2
Il9r	0	6.64333	0.24	0.003	0	ILC2	Il9r
Ccl1	0	5.62915	0.248	0.012	0	ILC2	Ccl1
Plaur	0	3.81388	0.256	0.021	0	ILC2	Plaur
Klf5	0	7.07982	0.233	0.002	0	ILC2	Klf5
Arhgef6	0	1.94622	0.359	0.128	0	ILC2	Arhgef6
Rpl35	0	1.07998	0.929	0.7	0	ILC2	Rpl35
Rapgef2	0	2.18512	0.302	0.074	0	ILC2	Rapgef2
Il1rl1	0	5.57961	0.235	0.009	0	ILC2	Il1rl1
Dnaja1	0	1.66185	0.928	0.707	0	ILC2	Dnaja1
Npnt	0	2.14024	0.287	0.068	0	ILC2	Npnt
Samsn1	0	1.34525	0.979	0.76	0	ILC2	Samsn1
Faah	0	2.66652	0.261	0.046	0	ILC2	Faah
Lilrb4a	0	2.17449	0.277	0.062	0	ILC2	Lilrb4a
Adora2a	0	2.83846	0.249	0.035	0	ILC2	Adora2a
Atp8a2	0	3.97999	0.228	0.015	0	ILC2	Atp8a2
Klk8	0	2.62933	0.257	0.045	0	ILC2	Klk8
Soat1	0	2.67624	0.257	0.048	0	ILC2	Soat1
Hilpda	0	1.78399	0.947	0.738	0	ILC2	Hilpda
Il5	0	7.2634	0.211	0.004	0	ILC2	Il5
AW011738	0	2.65812	0.251	0.046	0	ILC2	AW011738
H2-Oa	0	2.98118	0.234	0.029	0	ILC2	H2-Oa
Mras	0	5.0044	0.213	0.008	0	ILC2	Mras
Sorbs1	0	3.11155	0.236	0.033	0	ILC2	Sorbs1
4932438H23Rik	0	4.29268	0.214	0.012	0	ILC2	4932438H23Rik
Gm13219	0	6.76623	0.198	0.002	0	ILC2	Gm13219
Emp3	0	2.33219	0.247	0.052	0	ILC2	Emp3
Ptgir	0	6.96606	0.193	0.001	0	ILC2	Ptgir
Serinc3	0	1.18165	0.982	0.794	0	ILC2	Serinc3
Ar	0	3.40753	0.203	0.019	0	ILC2	Ar
Gm48236	0	3.35678	0.201	0.021	0	ILC2	Gm48236
Pparg	0	6.32541	0.182	0.002	0	ILC2	Pparg
Ccr8	0	5.95805	0.183	0.003	0	ILC2	Ccr8
Chdh	0	4.48972	0.186	0.009	0	ILC2	Chdh
Hba-a1	0	7.07993	0.176	0.002	0	ILC2	Hba-a1
Il13	0	6.89567	0.176	0.003	0	ILC2	Il13
Kif23	0	2.92617	0.182	0.026	0	ILC2	Kif23
Lgals7	0	5.47662	0.156	0.004	0	ILC2	Lgals7
Lpcat2	0	4.71626	0.155	0.007	0	ILC2	Lpcat2
Adam19	0	3.13302	0.165	0.02	0	ILC2	Adam19
Rps17	0	0.830468	0.95	0.806	0	ILC2	Rps17
Tanc2	0	3.64536	0.155	0.013	0	ILC2	Tanc2
Rxrg	0	6.96384	0.141	0.001	0	ILC2	Rxrg
Rgs2	0	1.71762	0.982	0.849	0	ILC2	Rgs2
Slc25a3	0	0.811306	0.951	0.819	0	ILC2	Slc25a3
Uba52	0	0.795207	0.961	0.831	0	ILC2	Uba52
Rpl28	0	0.761813	0.952	0.823	0	ILC2	Rpl28
Specc1	0	4.47036	0.132	0.006	0	ILC2	Specc1
Rpl38	0	0.885293	0.971	0.845	0	ILC2	Rpl38
Nrip1	0	0.68512	0.948	0.823	0	ILC2	Nrip1
Rab27b	0	4.86504	0.129	0.005	0	ILC2	Rab27b
Rps28	0	0.995156	0.976	0.853	0	ILC2	Rps28
Rps10	0	0.931828	0.981	0.859	0	ILC2	Rps10
Scel	0	6.88789	0.121	0.001	0	ILC2	Scel
Lgmn	0	4.45842	0.126	0.006	0	ILC2	Lgmn
Rpl12	0	1.1155	0.987	0.868	0	ILC2	Rpl12
Rpl22	0	0.724823	0.962	0.845	0	ILC2	Rpl22
Npm1	0	0.722992	0.956	0.841	0	ILC2	Npm1
Tph1	0	6.67364	0.113	0.002	0	ILC2	Tph1
Rack1	0	0.725153	0.968	0.861	0	ILC2	Rack1
Rpl10a	0	0.901561	0.98	0.879	0	ILC2	Rpl10a
Rpl36	0	0.927814	0.987	0.889	0	ILC2	Rpl36
Rpl3	0	0.732442	0.974	0.878	0	ILC2	Rpl3
Rpl7a	0	0.660814	0.975	0.889	0	ILC2	Rpl7a
Rpl31	0	0.754439	0.97	0.893	0	ILC2	Rpl31
Rpl8	0	0.730449	0.983	0.912	0	ILC2	Rpl8
Rpl35a	0	0.70053	0.981	0.91	0	ILC2	Rpl35a
Sub1	0	1.11863	0.987	0.921	0	ILC2	Sub1
Rpsa	0	1.04557	0.995	0.93	0	ILC2	Rpsa
Rpl39	0	1.05571	0.997	0.936	0	ILC2	Rpl39
Rps8	0	0.977335	0.994	0.936	0	ILC2	Rps8
Rpl4	0	0.67261	0.986	0.928	0	ILC2	Rpl4
Rps13	0	0.872557	0.993	0.936	0	ILC2	Rps13
Rpl37	0	0.827439	0.989	0.933	0	ILC2	Rpl37
Rps20	0	1.26854	0.998	0.945	0	ILC2	Rps20
Rps19	0	1.02439	0.997	0.95	0	ILC2	Rps19
Rps15	0	0.782486	0.992	0.945	0	ILC2	Rps15
Rps26	0	1.04177	0.996	0.953	0	ILC2	Rps26
Rpl26	0	0.803927	0.993	0.95	0	ILC2	Rpl26
Rpl7	0	0.607753	0.989	0.947	0	ILC2	Rpl7
Rps12	0	0.952041	0.995	0.956	0	ILC2	Rps12
Rpl6	0	0.756948	0.994	0.958	0	ILC2	Rpl6
Rps21	0	0.782849	0.996	0.962	0	ILC2	Rps21
Rps5	0	0.780798	0.995	0.963	0	ILC2	Rps5
Rpl14	0	0.647965	0.993	0.963	0	ILC2	Rpl14
Rpl15	0	0.736148	0.994	0.966	0	ILC2	Rpl15
Rps6	0	1.08953	0.999	0.972	0	ILC2	Rps6
Rpl18	0	0.592072	0.993	0.967	0	ILC2	Rpl18
Rpl41	0	0.837713	0.998	0.973	0	ILC2	Rpl41
Rps4x	0	0.811292	0.997	0.975	0	ILC2	Rps4x
Rpl11	0	0.710978	0.997	0.975	0	ILC2	Rpl11
Rps27a	0	0.85032	0.999	0.978	0	ILC2	Rps27a
Rps18	0	1.03202	0.999	0.978	0	ILC2	Rps18
Rpl21	0	0.492626	0.995	0.976	0	ILC2	Rpl21
Rps11	0	0.835167	0.999	0.98	0	ILC2	Rps11
Rps3	0	0.775719	0.999	0.983	0	ILC2	Rps3
Rpl19	0	0.837126	0.999	0.984	0	ILC2	Rpl19
Rpl30	0	0.688797	0.998	0.983	0	ILC2	Rpl30
Rps2	0	0.779431	0.998	0.983	0	ILC2	Rps2
Rpl27	0	0.608422	0.997	0.983	0	ILC2	Rpl27
Rps29	0	0.748124	0.999	0.985	0	ILC2	Rps29
Rplp0	0	0.8992	0.999	0.986	0	ILC2	Rplp0
Rpl23a	0	0.718304	0.999	0.986	0	ILC2	Rpl23a
Rpl32	0	1.05062	1	0.988	0	ILC2	Rpl32
Rpl37a	0	1.08611	1	0.989	0	ILC2	Rpl37a
Rpl34	0	0.667997	0.999	0.988	0	ILC2	Rpl34
Rpl27a	0	0.686364	0.999	0.988	0	ILC2	Rpl27a
Rpl9	0	0.64402	1	0.991	0	ILC2	Rpl9
Rpl5	0	0.829168	1	0.991	0	ILC2	Rpl5
Rpl23	0	0.844057	1	0.991	0	ILC2	Rpl23
Rps7	0	0.945629	1	0.991	0	ILC2	Rps7
Rps3a1	0	0.787189	1	0.992	0	ILC2	Rps3a1
Rps9	0	1.01759	1	0.993	0	ILC2	Rps9
Rps15a	0	0.739634	0.999	0.992	0	ILC2	Rps15a
H2-K1	0	0.470344	0.999	0.992	0	ILC2	H2-K1
Fau	0	0.593452	1	0.994	0	ILC2	Fau
Rps14	0	0.60521	1	0.996	0	ILC2	Rps14
Rps16	0	0.7453	1	0.997	0	ILC2	Rps16
Rplp2	0	0.773922	1	0.997	0	ILC2	Rplp2
Rps23	0	0.748124	1	0.997	0	ILC2	Rps23
Rps27	0	0.771622	1	0.998	0	ILC2	Rps27
Rpl18a	0	0.808114	1	0.998	0	ILC2	Rpl18a
Rpl17	0	0.735871	0.999	0.997	0	ILC2	Rpl17
Tmsb4x	0	0.520594	1	0.999	0	ILC2	Tmsb4x
Rpl13	0	0.853915	1	0.999	0	ILC2	Rpl13
Rps24	0	0.917554	1	0.999	0	ILC2	Rps24
Tpt1	0	0.39093	1	1	0	ILC2	Tpt1
Rplp1	0	1.67026	1	1	0	ILC2	Rplp1
Eef1a1	0	0.462492	1	1	0	ILC2	Eef1a1
Nsg2	6.22662e-307	5.23915	0.114	0.003	9.7428e-303	ILC2	Nsg2
Hlf	3.97054e-305	2.49626	0.211	0.041	6.2127e-301	ILC2	Hlf
Jdp2	1.97775e-300	2.46139	0.219	0.046	3.09458e-296	ILC2	Jdp2
Ivns1abp	3.84956e-300	0.963067	0.717	0.451	6.0234e-296	ILC2	Ivns1abp
Csf2	1.68613e-299	2.09661	0.5	0.257	2.63828e-295	ILC2	Csf2
Kcnn4	1.71052e-299	4.13727	0.126	0.008	2.67646e-295	ILC2	Kcnn4
Pdcd1lg2	3.92274e-299	2.2516	0.226	0.049	6.13792e-295	ILC2	Pdcd1lg2
Nck2	6.17579e-298	3.48152	0.142	0.013	9.66326e-294	ILC2	Nck2
Ebi3	5.82783e-297	2.91146	0.166	0.022	9.1188e-293	ILC2	Ebi3
Bmp7	5.18174e-296	5.45269	0.108	0.003	8.10787e-292	ILC2	Bmp7
Selenot	2.8793e-292	1.09467	0.621	0.357	4.50524e-288	ILC2	Selenot
Ifngr2	7.74249e-292	1.71893	0.326	0.109	1.21147e-287	ILC2	Ifngr2
Rpl13a	3.70456e-291	0.80098	0.793	0.55	5.79653e-287	ILC2	Rpl13a
Ppp2r3a	7.76312e-289	4.32489	0.117	0.006	1.21469e-284	ILC2	Ppp2r3a
Ifitm2	1.04404e-286	2.20444	0.202	0.039	1.63361e-282	ILC2	Ifitm2
Itgb7	2.2125e-286	1.04305	0.596	0.324	3.46189e-282	ILC2	Itgb7
B230307C23Rik	5.71364e-286	2.56523	0.19	0.034	8.94012e-282	ILC2	B230307C23Rik
Prxl2a	9.21087e-285	2.67634	0.176	0.028	1.44123e-280	ILC2	Prxl2a
B2m	8.35432e-284	0.320187	1	1	1.3072e-279	ILC2	B2m
Trdv4	1.98284e-283	3.01074	0.153	0.019	3.10256e-279	ILC2	Trdv4
Arl5a	2.35467e-281	1.88473	0.284	0.085	3.68435e-277	ILC2	Arl5a
Eef2	4.45976e-281	0.54638	0.956	0.866	6.97819e-277	ILC2	Eef2
Gm10076	5.1314e-281	1.13107	0.547	0.286	8.02909e-277	ILC2	Gm10076
Rpl22l1	6.12364e-279	0.75325	0.854	0.648	9.58165e-275	ILC2	Rpl22l1
Selenow	2.03097e-278	1.0412	0.59	0.32	3.17785e-274	ILC2	Selenow
Skap1	1.28126e-277	1.05111	0.566	0.297	2.00479e-273	ILC2	Skap1
Rbfa	3.75321e-277	1.84613	0.298	0.096	5.87266e-273	ILC2	Rbfa
Fbxl21	5.9155e-274	3.42435	0.135	0.013	9.25598e-270	ILC2	Fbxl21
Tbca	3.45531e-271	1.08422	0.569	0.31	5.40653e-267	ILC2	Tbca
Pde4d	2.02778e-270	2.1845	0.216	0.049	3.17286e-266	ILC2	Pde4d
Isg15	6.24597e-268	1.52364	0.37	0.146	9.77307e-264	ILC2	Isg15
Ctla2a	4.52243e-267	4.33745	0.127	0.011	7.07625e-263	ILC2	Ctla2a
Nrros	9.47704e-267	2.36309	0.194	0.039	1.48287e-262	ILC2	Nrros
Stxbp6	1.59516e-266	5.33256	0.098	0.002	2.49595e-262	ILC2	Stxbp6
Gla	1.65175e-266	2.46933	0.227	0.057	2.5845e-262	ILC2	Gla
Pnn	1.13475e-264	1.25276	0.483	0.238	1.77554e-260	ILC2	Pnn
Akr1c12	2.57752e-264	5.94822	0.095	0.002	4.03304e-260	ILC2	Akr1c12
Rpl29	3.62808e-262	0.510325	0.967	0.89	5.67685e-258	ILC2	Rpl29
Homer2	2.50072e-259	6.74038	0.09	0.001	3.91288e-255	ILC2	Homer2
Nop53	1.03236e-258	0.798521	0.806	0.594	1.61534e-254	ILC2	Nop53
Tmem273	1.39321e-258	1.67594	0.31	0.108	2.17995e-254	ILC2	Tmem273
Zdhhc23	1.58422e-257	3.18764	0.138	0.017	2.47883e-253	ILC2	Zdhhc23
Rps25	6.86402e-257	0.5455	0.942	0.837	1.07401e-252	ILC2	Rps25
mt-Co1	9.04026e-255	0.306848	1	1	1.41453e-250	ILC2	mt-Co1
Map4k3	4.25937e-253	2.44805	0.177	0.034	6.66464e-249	ILC2	Map4k3
Heph	1.39168e-251	1.1246	0.496	0.252	2.17756e-247	ILC2	Heph
Creb3l1	7.43164e-248	3.91818	0.108	0.007	1.16283e-243	ILC2	Creb3l1
Cacna1d	4.83876e-244	4.77241	0.095	0.004	7.5712e-240	ILC2	Cacna1d
Lgals9	3.99923e-243	1.39958	0.369	0.154	6.2576e-239	ILC2	Lgals9
2410006H16Rik	7.82373e-243	0.892298	0.661	0.411	1.22418e-238	ILC2	2410006H16Rik
Dgat2	1.29094e-242	3.05054	0.132	0.016	2.01993e-238	ILC2	Dgat2
Pou2f2	7.90599e-240	3.62846	0.112	0.009	1.23705e-235	ILC2	Pou2f2
Fbxo34	2.96451e-238	1.68593	0.29	0.101	4.63857e-234	ILC2	Fbxo34
Acer2	1.12963e-237	5.33535	0.088	0.002	1.76753e-233	ILC2	Acer2
B4galt1	2.47324e-236	1.61255	0.279	0.094	3.86988e-232	ILC2	B4galt1
Gm973	2.54596e-235	7.91589	0.079	0	3.98367e-231	ILC2	Gm973
Ptpn9	3.74536e-235	1.89544	0.232	0.066	5.86036e-231	ILC2	Ptpn9
Tiparp	5.39923e-232	0.993021	0.598	0.356	8.44817e-228	ILC2	Tiparp
Ptpn18	7.68319e-230	0.923966	0.589	0.344	1.20219e-225	ILC2	Ptpn18
Apaf1	2.20745e-229	1.71065	0.27	0.091	3.45399e-225	ILC2	Apaf1
Suco	3.21952e-226	1.19408	0.483	0.259	5.03758e-222	ILC2	Suco
Fos	3.60291e-225	0.589838	0.981	0.967	5.63747e-221	ILC2	Fos
Rpl24	8.45765e-225	0.574154	0.9	0.748	1.32337e-220	ILC2	Rpl24
Nckap5	9.3896e-225	4.21879	0.093	0.005	1.46919e-220	ILC2	Nckap5
Glrx	3.01205e-223	2.15914	0.188	0.045	4.71296e-219	ILC2	Glrx
Nxpe4	1.18795e-222	6.18524	0.079	0.001	1.85879e-218	ILC2	Nxpe4
Tbck	1.01957e-221	2.05344	0.208	0.057	1.59533e-217	ILC2	Tbck
Prkcq	2.17337e-217	2.2255	0.166	0.035	3.40068e-213	ILC2	Prkcq
Bcl11b	5.07361e-217	2.05895	0.189	0.047	7.93868e-213	ILC2	Bcl11b
Nmur1	5.5496e-217	4.32318	0.089	0.004	8.68346e-213	ILC2	Nmur1
Frmd4b	4.52573e-216	1.22967	0.431	0.215	7.08142e-212	ILC2	Frmd4b
Gm20627	2.67201e-215	2.33945	0.164	0.035	4.18089e-211	ILC2	Gm20627
Il2ra	2.04884e-214	0.825621	0.665	0.426	3.20581e-210	ILC2	Il2ra
Lsm8	1.37521e-212	1.14408	0.452	0.232	2.15179e-208	ILC2	Lsm8
Plscr1	1.73351e-211	1.03934	0.51	0.283	2.71242e-207	ILC2	Plscr1
Ighm	2.30351e-210	1.5921	0.238	0.075	3.6043e-206	ILC2	Ighm
Angpt1	2.48242e-210	4.25587	0.087	0.004	3.88424e-206	ILC2	Angpt1
Naip5	3.80593e-210	3.55111	0.101	0.009	5.95513e-206	ILC2	Naip5
Gm47601	2.66543e-206	6.01025	0.073	0.001	4.1706e-202	ILC2	Gm47601
Cipc	6.61745e-206	2.28777	0.158	0.034	1.03543e-201	ILC2	Cipc
Tkt	1.72066e-205	1.27106	0.351	0.154	2.69231e-201	ILC2	Tkt
Tent5a	5.16199e-204	1.26408	0.403	0.198	8.07697e-200	ILC2	Tent5a
Gm2a	3.75956e-203	1.04717	0.435	0.218	5.88259e-199	ILC2	Gm2a
Sptssa	2.24265e-202	0.925719	0.626	0.412	3.50908e-198	ILC2	Sptssa
Pard3	2.86742e-200	3.26131	0.102	0.011	4.48665e-196	ILC2	Pard3
Rab8b	8.10841e-200	0.886139	0.557	0.329	1.26872e-195	ILC2	Rab8b
H2-Q7	2.26404e-198	0.488316	0.928	0.781	3.54255e-194	ILC2	H2-Q7
Mboat1	1.39775e-197	3.68777	0.091	0.007	2.18706e-193	ILC2	Mboat1
Art2b	1.8845e-196	2.5033	0.129	0.022	2.94868e-192	ILC2	Art2b
Mxi1	2.22245e-195	1.68759	0.248	0.088	3.47747e-191	ILC2	Mxi1
Galnt3	2.54173e-194	5.76031	0.069	0.001	3.97705e-190	ILC2	Galnt3
Cnih1	2.32088e-193	1.73901	0.217	0.069	3.63148e-189	ILC2	Cnih1
Kcnq5	1.26153e-192	2.15492	0.161	0.038	1.97392e-188	ILC2	Kcnq5
Cbarp	1.49307e-191	1.51526	0.247	0.087	2.3362e-187	ILC2	Cbarp
Itgb3	2.30226e-190	1.04301	0.421	0.213	3.60235e-186	ILC2	Itgb3
Klf2	5.53716e-190	1.43136	0.406	0.211	8.66399e-186	ILC2	Klf2
Mia2	7.99646e-188	0.883236	0.55	0.33	1.25121e-183	ILC2	Mia2
Cytip	9.94518e-188	0.639052	0.819	0.645	1.55612e-183	ILC2	Cytip
Zc3hav1	1.14536e-187	0.748942	0.696	0.486	1.79215e-183	ILC2	Zc3hav1
Rad50	5.93829e-187	1.54569	0.255	0.094	9.29164e-183	ILC2	Rad50
Nsa2	8.91229e-187	0.851199	0.558	0.338	1.39451e-182	ILC2	Nsa2
Aldoa	1.04598e-186	0.808895	0.597	0.377	1.63664e-182	ILC2	Aldoa
Lcp2	1.8371e-186	0.732539	0.643	0.414	2.87451e-182	ILC2	Lcp2
Tapbpl	1.30169e-185	1.49914	0.264	0.101	2.03676e-181	ILC2	Tapbpl
Pde7b	2.46222e-185	1.86738	0.182	0.05	3.85264e-181	ILC2	Pde7b
Eef1d	8.8384e-185	0.872226	0.54	0.324	1.38294e-180	ILC2	Eef1d
1700113H08Rik	3.14274e-184	2.39952	0.129	0.024	4.91744e-180	ILC2	1700113H08Rik
Stab2	4.02938e-184	2.30923	0.17	0.045	6.30476e-180	ILC2	Stab2
Cybb	8.74719e-182	3.96758	0.08	0.006	1.36867e-177	ILC2	Cybb
Fam102a	4.75765e-180	1.29552	0.313	0.137	7.44429e-176	ILC2	Fam102a
Gbp7	8.68623e-179	1.38276	0.275	0.11	1.35914e-174	ILC2	Gbp7
Ugcg	2.71589e-178	1.2264	0.297	0.124	4.24955e-174	ILC2	Ugcg
Catsperd	2.22393e-177	4.55362	0.071	0.003	3.47978e-173	ILC2	Catsperd
Il6	3.46639e-176	5.59073	0.069	0.003	5.42385e-172	ILC2	Il6
Rtn3	2.13649e-175	1.11393	0.405	0.212	3.34296e-171	ILC2	Rtn3
Churc1	5.25651e-174	1.28762	0.293	0.124	8.22485e-170	ILC2	Churc1
Cd81	1.89224e-173	1.24544	0.259	0.098	2.96078e-169	ILC2	Cd81
2510009E07Rik	5.79429e-173	3.21303	0.091	0.01	9.06633e-169	ILC2	2510009E07Rik
Tespa1	2.88855e-171	1.13168	0.352	0.168	4.51971e-167	ILC2	Tespa1
Hgsnat	5.46578e-171	1.86774	0.179	0.053	8.5523e-167	ILC2	Hgsnat
Zfas1	3.26158e-169	1.0622	0.391	0.202	5.1034e-165	ILC2	Zfas1
Ttc3	2.1422e-168	1.59177	0.209	0.07	3.3519e-164	ILC2	Ttc3
Larp1	3.16697e-168	1.38984	0.268	0.11	4.95536e-164	ILC2	Larp1
Galc	9.41488e-168	2.13679	0.14	0.032	1.47315e-163	ILC2	Galc
Ero1l	1.5292e-167	1.21485	0.432	0.244	2.39274e-163	ILC2	Ero1l
H2-D1	1.15326e-166	0.278283	0.999	0.995	1.80451e-162	ILC2	H2-D1
I730030J21Rik	7.89302e-164	3.71672	0.075	0.006	1.23502e-159	ILC2	I730030J21Rik
Acbd7	2.90388e-163	3.04038	0.094	0.013	4.54371e-159	ILC2	Acbd7
Eif3e	4.63722e-163	0.705106	0.643	0.44	7.25585e-159	ILC2	Eif3e
Zc3h12c	8.59245e-162	2.95036	0.091	0.012	1.34446e-157	ILC2	Zc3h12c
Etv3	1.18632e-160	1.24353	0.329	0.158	1.85623e-156	ILC2	Etv3
Bmp2	2.32818e-160	2.06069	0.146	0.037	3.64291e-156	ILC2	Bmp2
Atp5g2	9.65089e-160	0.670463	0.658	0.452	1.51008e-155	ILC2	Atp5g2
Ctsd	4.21557e-159	1.05658	0.366	0.186	6.5961e-155	ILC2	Ctsd
Pglyrp2	4.91273e-158	1.84112	0.159	0.045	7.68695e-154	ILC2	Pglyrp2
Ccnd2	9.67658e-158	0.75756	0.532	0.323	1.51409e-153	ILC2	Ccnd2
Eepd1	1.60944e-157	4.66195	0.064	0.003	2.5183e-153	ILC2	Eepd1
Sc5d	1.04775e-156	1.64602	0.186	0.06	1.63941e-152	ILC2	Sc5d
Anks6	1.81452e-156	2.91849	0.089	0.012	2.83918e-152	ILC2	Anks6
Tcrg-C1	2.49169e-156	0.882887	0.555	0.352	3.89874e-152	ILC2	Tcrg-C1
Dapp1	5.68809e-156	1.78804	0.173	0.053	8.90015e-152	ILC2	Dapp1
Akr1c13	9.67536e-156	3.00201	0.089	0.012	1.5139e-151	ILC2	Akr1c13
Bambi	5.69879e-155	1.72882	0.194	0.066	8.9169e-151	ILC2	Bambi
Nav2	6.09608e-152	3.6089	0.07	0.005	9.53854e-148	ILC2	Nav2
Hspe1	1.84033e-151	0.844894	0.465	0.273	2.87956e-147	ILC2	Hspe1
Atp8a1	1.07922e-150	1.57449	0.189	0.064	1.68866e-146	ILC2	Atp8a1
Lrrc52	1.76472e-150	6.63844	0.052	0	2.76125e-146	ILC2	Lrrc52
Cnot6l	9.15073e-150	0.877992	0.465	0.274	1.43181e-145	ILC2	Cnot6l
Naca	5.15728e-149	0.484478	0.869	0.732	8.06959e-145	ILC2	Naca
Arid5b	1.08276e-148	1.32985	0.287	0.132	1.69419e-144	ILC2	Arid5b
Atl3	1.46323e-146	1.40742	0.235	0.095	2.28952e-142	ILC2	Atl3
Swap70	2.24202e-145	1.5046	0.2	0.072	3.50809e-141	ILC2	Swap70
Prnp	2.57268e-145	2.84041	0.085	0.012	4.02548e-141	ILC2	Prnp
Crybg1	7.00069e-145	2.42674	0.106	0.021	1.0954e-140	ILC2	Crybg1
Cdk11b	1.33674e-144	0.846995	0.648	0.47	2.09159e-140	ILC2	Cdk11b
Grb2	5.4403e-142	0.871984	0.447	0.263	8.51243e-138	ILC2	Grb2
Hspa4	6.19216e-142	0.759591	0.548	0.36	9.68887e-138	ILC2	Hspa4
Eif3f	7.85433e-142	0.552435	0.738	0.553	1.22897e-137	ILC2	Eif3f
Chn2	3.30418e-140	1.0489	0.316	0.155	5.17006e-136	ILC2	Chn2
Rpl9-ps6	3.43576e-140	1.18907	0.274	0.125	5.37593e-136	ILC2	Rpl9-ps6
Rcsd1	3.99431e-139	1.08655	0.315	0.155	6.24989e-135	ILC2	Rcsd1
Plac8	2.71562e-138	1.09162	0.263	0.117	4.24913e-134	ILC2	Plac8
Socs5	2.72332e-137	2.23475	0.108	0.023	4.26117e-133	ILC2	Socs5
Hspa8	4.58363e-137	0.358757	0.959	0.91	7.17201e-133	ILC2	Hspa8
Ythdc1	8.5268e-135	0.810603	0.583	0.402	1.33419e-130	ILC2	Ythdc1
Vps54	2.37044e-134	1.23201	0.246	0.107	3.70902e-130	ILC2	Vps54
Rcn1	7.69157e-134	2.38783	0.097	0.019	1.2035e-129	ILC2	Rcn1
Fgl2	2.28918e-133	0.721562	0.496	0.305	3.58188e-129	ILC2	Fgl2
Arhgef10l	2.60187e-133	5.45816	0.049	0.001	4.07115e-129	ILC2	Arhgef10l
Tet2	6.23663e-133	1.32422	0.223	0.091	9.75845e-129	ILC2	Tet2
Cox7a2l	6.38907e-133	0.57131	0.68	0.489	9.99698e-129	ILC2	Cox7a2l
Ppp1r14b	1.70022e-132	1.45481	0.197	0.075	2.66034e-128	ILC2	Ppp1r14b
Cnn2	3.43528e-132	0.857565	0.402	0.227	5.37518e-128	ILC2	Cnn2
Ppfibp2	6.55051e-132	1.72846	0.143	0.042	1.02496e-127	ILC2	Ppfibp2
Selenok	1.39209e-131	0.564375	0.771	0.62	2.1782e-127	ILC2	Selenok
Cfap53	2.15009e-131	3.45605	0.065	0.006	3.36424e-127	ILC2	Cfap53
Cystm1	5.63326e-130	2.61207	0.093	0.017	8.81436e-126	ILC2	Cystm1
Dus2	5.73184e-130	1.89992	0.132	0.037	8.96861e-126	ILC2	Dus2
Tcrg-C4	2.8096e-128	1.04393	0.295	0.144	4.39618e-124	ILC2	Tcrg-C4
Hpgds	5.57765e-128	2.58682	0.077	0.011	8.72735e-124	ILC2	Hpgds
Prkcz	5.93738e-128	4.7183	0.051	0.002	9.29022e-124	ILC2	Prkcz
Arhgap15	1.22442e-127	0.989817	0.294	0.143	1.91586e-123	ILC2	Arhgap15
Ptprcap	3.41811e-127	0.69859	0.519	0.333	5.34831e-123	ILC2	Ptprcap
Tinf2	4.08391e-127	1.09774	0.295	0.147	6.39009e-123	ILC2	Tinf2
Alox5	1.69008e-126	6.50657	0.044	0	2.64447e-122	ILC2	Alox5
Dennd4a	1.06354e-125	0.624928	0.583	0.399	1.66412e-121	ILC2	Dennd4a
Ndufa6	1.71331e-125	0.633366	0.611	0.428	2.68082e-121	ILC2	Ndufa6
Epb41l4a	5.15965e-125	5.82819	0.044	0.001	8.0733e-121	ILC2	Epb41l4a
Osbpl8	1.66823e-124	1.24861	0.23	0.1	2.61027e-120	ILC2	Osbpl8
Krt80	1.84941e-124	7.22918	0.042	0	2.89378e-120	ILC2	Krt80
Grin2d	2.71461e-123	3.71239	0.057	0.004	4.24755e-119	ILC2	Grin2d
Gm20388	3.97032e-123	0.894086	0.34	0.182	6.21236e-119	ILC2	Gm20388
Jmy	6.74722e-122	0.881752	0.397	0.232	1.05574e-117	ILC2	Jmy
Zfand5	5.73248e-121	0.807007	0.617	0.464	8.96961e-117	ILC2	Zfand5
Efcc1	6.07317e-121	6.00217	0.043	0.001	9.50269e-117	ILC2	Efcc1
A630001O12Rik	3.29744e-120	4.47285	0.048	0.002	5.1595e-116	ILC2	A630001O12Rik
Tnfrsf10b	1.037e-119	2.18068	0.097	0.021	1.6226e-115	ILC2	Tnfrsf10b
Myc	1.63285e-119	1.87493	0.114	0.03	2.55493e-115	ILC2	Myc
Cd24a	2.48166e-119	4.85468	0.048	0.002	3.88306e-115	ILC2	Cd24a
Impact	5.39962e-119	1.32202	0.199	0.081	8.44879e-115	ILC2	Impact
Trbc2	1.59493e-118	0.461857	0.8	0.618	2.49559e-114	ILC2	Trbc2
Dpp4	2.75478e-118	1.86747	0.117	0.032	4.31041e-114	ILC2	Dpp4
Ptprc	7.46122e-118	0.396359	0.832	0.672	1.16746e-113	ILC2	Ptprc
Flt3l	1.63341e-117	1.55812	0.155	0.054	2.5558e-113	ILC2	Flt3l
Herc1	4.07269e-117	1.00971	0.288	0.145	6.37254e-113	ILC2	Herc1
Prkcb	5.16213e-117	1.43211	0.162	0.057	8.07719e-113	ILC2	Prkcb
Ctnna1	9.56842e-117	1.10726	0.248	0.115	1.49717e-112	ILC2	Ctnna1
Atp5e	1.31229e-116	0.617245	0.585	0.408	2.05334e-112	ILC2	Atp5e
Abcb1a	1.45301e-116	0.720461	0.416	0.246	2.27352e-112	ILC2	Abcb1a
Rpl36a-ps1	2.45963e-116	1.83316	0.12	0.034	3.84858e-112	ILC2	Rpl36a-ps1
Rora	3.12524e-116	0.33945	0.968	0.94	4.89006e-112	ILC2	Rora
Dnah12	4.07792e-116	3.88939	0.051	0.003	6.38073e-112	ILC2	Dnah12
Cd47	5.02481e-116	0.622462	0.559	0.38	7.86232e-112	ILC2	Cd47
Ada	8.9277e-116	2.11578	0.098	0.023	1.39692e-111	ILC2	Ada
Taf1d	4.84285e-115	0.756929	0.434	0.265	7.57761e-111	ILC2	Taf1d
Rexo2	6.10348e-115	0.854747	0.366	0.208	9.55012e-111	ILC2	Rexo2
H2-T22	6.6875e-115	0.941762	0.301	0.155	1.04639e-110	ILC2	H2-T22
Cpq	1.18151e-114	1.83987	0.115	0.032	1.8487e-110	ILC2	Cpq
Lztfl1	3.54969e-114	0.917635	0.321	0.172	5.5542e-110	ILC2	Lztfl1
Tubb5	4.78667e-113	0.815105	0.385	0.226	7.4897e-109	ILC2	Tubb5
Gm47599	7.57565e-113	3.35086	0.056	0.005	1.18536e-108	ILC2	Gm47599
Tpd52	1.8464e-112	1.06265	0.27	0.134	2.88906e-108	ILC2	Tpd52
mt-Atp6	4.49963e-112	0.243151	0.999	0.998	7.04057e-108	ILC2	mt-Atp6
Plcl1	1.61087e-111	4.15292	0.047	0.003	2.52053e-107	ILC2	Plcl1
Mylip	2.01373e-110	1.38135	0.173	0.067	3.15088e-106	ILC2	Mylip
Nkg7	2.59063e-110	0.349447	0.467	0.276	4.05356e-106	ILC2	Nkg7
Blvrb	3.55855e-110	2.29674	0.087	0.019	5.56806e-106	ILC2	Blvrb
Wdr89	5.86008e-110	1.17323	0.222	0.1	9.16927e-106	ILC2	Wdr89
Rgs10	6.22579e-110	0.828404	0.328	0.178	9.74149e-106	ILC2	Rgs10
Id2	1.49436e-109	0.709603	0.795	0.705	2.33823e-105	ILC2	Id2
Ppp1r15a	1.89648e-109	0.455837	0.882	0.786	2.96742e-105	ILC2	Ppp1r15a
Pdcd1	3.74712e-109	1.41229	0.147	0.051	5.86311e-105	ILC2	Pdcd1
Trps1	3.7547e-109	1.7982	0.114	0.032	5.87498e-105	ILC2	Trps1
Snrpg	4.15182e-109	0.45159	0.769	0.602	6.49635e-105	ILC2	Snrpg
Mrpl33	5.96992e-109	0.962135	0.303	0.161	9.34114e-105	ILC2	Mrpl33
Map1lc3a	2.41303e-108	1.16285	0.246	0.12	3.77567e-104	ILC2	Map1lc3a
Itpr2	2.78617e-108	0.778048	0.383	0.226	4.35952e-104	ILC2	Itpr2
Rps27rt	3.42207e-108	1.09358	0.243	0.116	5.35451e-104	ILC2	Rps27rt
Rasgrp4	1.2815e-106	1.88138	0.106	0.029	2.00517e-102	ILC2	Rasgrp4
Cltc	1.40394e-106	0.886343	0.34	0.194	2.19674e-102	ILC2	Cltc
Erap1	4.26248e-106	1.04842	0.248	0.121	6.66951e-102	ILC2	Erap1
H2-Q4	1.08234e-105	0.491017	0.678	0.5	1.69354e-101	ILC2	H2-Q4
Abcb9	1.53369e-105	1.07298	0.231	0.109	2.39976e-101	ILC2	Abcb9
Usp3	7.13886e-105	1.10513	0.234	0.111	1.11702e-100	ILC2	Usp3
Wipf3	1.87561e-104	6.52393	0.036	0	2.93476e-100	ILC2	Wipf3
Malat1	1.92694e-104	0.266321	0.998	0.999	3.01508e-100	ILC2	Malat1
Mrpl30	2.86557e-104	1.05505	0.25	0.123	4.48376e-100	ILC2	Mrpl30
Ndufa10	4.27415e-104	0.916338	0.298	0.16	6.68776e-100	ILC2	Ndufa10
Pabpc1	2.36186e-103	0.257696	0.978	0.935	3.6956e-99	ILC2	Pabpc1
Sh3kbp1	2.74507e-103	0.639944	0.483	0.316	4.29522e-99	ILC2	Sh3kbp1
Coro2a	3.39516e-103	0.629658	0.502	0.335	5.3124e-99	ILC2	Coro2a
Cd3g	8.62811e-103	1.42627	0.174	0.071	1.35004e-98	ILC2	Cd3g
Lif	1.53469e-102	1.57554	0.135	0.046	2.40133e-98	ILC2	Lif
Gbp2	6.21487e-102	1.38135	0.187	0.08	9.7244e-98	ILC2	Gbp2
Ube2e2	2.42468e-101	4.13974	0.043	0.002	3.7939e-97	ILC2	Ube2e2
4930412O13Rik	4.21247e-101	6.6139	0.035	0	6.59126e-97	ILC2	4930412O13Rik
Sp140	4.37977e-101	1.32649	0.165	0.065	6.85303e-97	ILC2	Sp140
Glul	1.56674e-100	1.04547	0.288	0.155	2.45148e-96	ILC2	Glul
Pcsk1	1.21448e-99	6.01234	0.036	0.001	1.9003e-95	ILC2	Pcsk1
Mir142hg	3.28744e-99	0.608832	0.503	0.337	5.14386e-95	ILC2	Mir142hg
Hba-a2	5.67812e-99	6.6139	0.034	0	8.88456e-95	ILC2	Hba-a2
Cyp2d22	6.06083e-99	3.57642	0.049	0.005	9.48338e-95	ILC2	Cyp2d22
Itpr3	7.34217e-99	1.29785	0.17	0.07	1.14883e-94	ILC2	Itpr3
Galnt10	6.27245e-98	1.95625	0.093	0.024	9.8145e-94	ILC2	Galnt10
Ppp3ca	1.05177e-96	0.77354	0.341	0.198	1.64571e-92	ILC2	Ppp3ca
Noxa1	1.09235e-96	5.18306	0.036	0.001	1.70919e-92	ILC2	Noxa1
Klf6	4.09904e-96	0.518758	0.771	0.643	6.41377e-92	ILC2	Klf6
Rb1	4.48797e-96	0.917351	0.287	0.157	7.02232e-92	ILC2	Rb1
Psme1	4.97212e-96	0.558047	0.559	0.399	7.77987e-92	ILC2	Psme1
Ltb4r1	9.42797e-96	1.16934	0.198	0.09	1.4752e-91	ILC2	Ltb4r1
Vrk1	7.43169e-95	0.941976	0.256	0.132	1.16284e-90	ILC2	Vrk1
Riok1	7.73578e-95	0.925619	0.294	0.164	1.21042e-90	ILC2	Riok1
Akap6	1.08435e-94	4.56108	0.036	0.001	1.69668e-90	ILC2	Akap6
Ndufa3	2.36225e-94	0.719932	0.388	0.24	3.69621e-90	ILC2	Ndufa3
Stk17b	2.79094e-93	0.38934	0.828	0.689	4.36699e-89	ILC2	Stk17b
Igkc	5.14436e-93	0.51592	0.702	0.55	8.04937e-89	ILC2	Igkc
Lat	7.85898e-93	0.786549	0.306	0.172	1.22969e-88	ILC2	Lat
Syne1	2.38823e-92	1.29986	0.168	0.071	3.73686e-88	ILC2	Syne1
Psen2	3.84067e-92	0.905266	0.27	0.145	6.00949e-88	ILC2	Psen2
Nedd4	3.85232e-92	0.678438	0.415	0.265	6.02772e-88	ILC2	Nedd4
St8sia4	6.10413e-92	0.924142	0.254	0.132	9.55113e-88	ILC2	St8sia4
Plxdc2	1.79742e-91	0.891058	0.281	0.154	2.81242e-87	ILC2	Plxdc2
Chd3	2.00016e-91	0.679941	0.384	0.237	3.12965e-87	ILC2	Chd3
Gnaq	2.28879e-91	1.48907	0.129	0.046	3.58127e-87	ILC2	Gnaq
Acp5	4.17674e-91	2.07326	0.072	0.015	6.53534e-87	ILC2	Acp5
Itpkb	4.43505e-91	0.934596	0.256	0.135	6.93953e-87	ILC2	Itpkb
Ppme1	1.02798e-90	1.21391	0.186	0.084	1.60848e-86	ILC2	Ppme1
Gm49980	1.63557e-90	1.02468	0.166	0.07	2.55918e-86	ILC2	Gm49980
Susd6	2.06513e-90	0.851944	0.336	0.202	3.23131e-86	ILC2	Susd6
St6galnac5	3.70591e-90	4.22423	0.036	0.001	5.79864e-86	ILC2	St6galnac5
Cops9	4.12454e-90	0.75803	0.356	0.217	6.45367e-86	ILC2	Cops9
Gm16271	7.16137e-90	2.39291	0.064	0.012	1.12054e-85	ILC2	Gm16271
Nxpe3	7.69535e-90	2.29956	0.067	0.013	1.20409e-85	ILC2	Nxpe3
Tsc22d3	2.1849e-89	0.547171	0.534	0.374	3.41871e-85	ILC2	Tsc22d3
Mvb12b	2.23158e-89	1.06627	0.204	0.097	3.49175e-85	ILC2	Mvb12b
Gm6213	3.18991e-89	5.0643	0.034	0.001	4.99125e-85	ILC2	Gm6213
Fosb	4.03426e-89	0.332534	0.95	0.901	6.31241e-85	ILC2	Fosb
Zfp638	2.76912e-88	0.805811	0.302	0.172	4.33284e-84	ILC2	Zfp638
Mical3	7.63063e-88	3.13441	0.046	0.005	1.19397e-83	ILC2	Mical3
Cct4	2.40705e-87	0.570618	0.484	0.331	3.76631e-83	ILC2	Cct4
Osbpl9	1.79526e-86	0.859315	0.433	0.297	2.80904e-82	ILC2	Osbpl9
Ikzf1	4.55287e-86	0.790219	0.303	0.174	7.12387e-82	ILC2	Ikzf1
Igha	9.8307e-86	0.475105	0.615	0.459	1.53821e-81	ILC2	Igha
Slc16a1	2.7517e-85	2.33801	0.061	0.011	4.30559e-81	ILC2	Slc16a1
Nfkbiz	4.30995e-85	0.520916	0.769	0.691	6.74378e-81	ILC2	Nfkbiz
Tnrc6a	1.10893e-84	1.15615	0.182	0.084	1.73514e-80	ILC2	Tnrc6a
Ube2l6	2.03916e-84	2.38369	0.062	0.012	3.19067e-80	ILC2	Ube2l6
Atp5mpl	2.28826e-84	0.596587	0.446	0.298	3.58044e-80	ILC2	Atp5mpl
Spry1	5.63794e-84	2.01799	0.085	0.023	8.82168e-80	ILC2	Spry1
Ddx39b	1.06792e-83	0.622069	0.407	0.263	1.67097e-79	ILC2	Ddx39b
Gfpt1	1.29456e-83	1.52012	0.115	0.04	2.0256e-79	ILC2	Gfpt1
Tbc1d4	2.63046e-83	2.52565	0.057	0.01	4.11588e-79	ILC2	Tbc1d4
Srrd	3.38714e-83	1.05919	0.21	0.105	5.29986e-79	ILC2	Srrd
Gpi1	4.61481e-83	0.657143	0.384	0.245	7.2208e-79	ILC2	Gpi1
Itm2c	7.10779e-83	0.494911	0.615	0.461	1.11216e-78	ILC2	Itm2c
Mat2a	8.76431e-83	0.545323	0.603	0.461	1.37135e-78	ILC2	Mat2a
Sh2d2a	1.69467e-82	0.442035	0.441	0.287	2.65164e-78	ILC2	Sh2d2a
Snrpe	1.75756e-82	0.549534	0.499	0.35	2.75005e-78	ILC2	Snrpe
Bscl2	2.29047e-82	1.23169	0.153	0.065	3.5839e-78	ILC2	Bscl2
Zcchc10	8.26182e-82	1.50891	0.122	0.045	1.29273e-77	ILC2	Zcchc10
Atp5c1	8.95038e-82	0.493523	0.545	0.388	1.40047e-77	ILC2	Atp5c1
Mbnl1	1.17466e-81	0.425065	0.692	0.54	1.83799e-77	ILC2	Mbnl1
Ppm1l	1.59463e-81	2.16077	0.069	0.016	2.49512e-77	ILC2	Ppm1l
Rab11fip5	7.08748e-81	4.13553	0.034	0.002	1.10898e-76	ILC2	Rab11fip5
Fzd6	1.05243e-80	2.74692	0.05	0.008	1.64673e-76	ILC2	Fzd6
Dkk3	2.10954e-80	1.03156	0.211	0.107	3.3008e-76	ILC2	Dkk3
Pde1c	2.55055e-80	1.60908	0.098	0.031	3.99085e-76	ILC2	Pde1c
Peli1	2.6527e-80	0.659777	0.386	0.249	4.15068e-76	ILC2	Peli1
Rbms1	3.35438e-80	0.670397	0.366	0.231	5.2486e-76	ILC2	Rbms1
Aplp2	4.13709e-80	0.564761	0.532	0.387	6.47331e-76	ILC2	Aplp2
Eif2d	5.33004e-80	1.02881	0.185	0.087	8.33992e-76	ILC2	Eif2d
Castor1	6.61193e-80	2.09576	0.069	0.016	1.03457e-75	ILC2	Castor1
Mtrr	2.94408e-79	2.06564	0.069	0.016	4.6066e-75	ILC2	Mtrr
Slc25a19	3.08332e-79	1.77797	0.089	0.027	4.82448e-75	ILC2	Slc25a19
Satb1	3.46943e-79	0.666193	0.363	0.23	5.42862e-75	ILC2	Satb1
Gm9750	8.14674e-79	1.57175	0.103	0.035	1.27472e-74	ILC2	Gm9750
Hspb11	8.29535e-79	1.70021	0.091	0.028	1.29797e-74	ILC2	Hspb11
Amph	1.59258e-78	2.80043	0.048	0.007	2.4919e-74	ILC2	Amph
Alad	2.27666e-78	1.7235	0.087	0.026	3.56228e-74	ILC2	Alad
Tspan32	2.34979e-78	0.925812	0.213	0.109	3.67671e-74	ILC2	Tspan32
Psmd13	2.39293e-78	0.889188	0.241	0.131	3.74422e-74	ILC2	Psmd13
Tecpr2	3.44376e-78	1.40322	0.124	0.048	5.38845e-74	ILC2	Tecpr2
Eprs	3.67059e-78	0.519952	0.757	0.647	5.74338e-74	ILC2	Eprs
Smpdl3a	6.18864e-78	0.545202	0.471	0.324	9.68336e-74	ILC2	Smpdl3a
Uck2	6.82177e-78	1.28951	0.135	0.055	1.0674e-73	ILC2	Uck2
Gm47283	9.74532e-78	0.549828	0.588	0.448	1.52485e-73	ILC2	Gm47283
Ide	1.05052e-77	0.745486	0.302	0.18	1.64374e-73	ILC2	Ide
Uqcrh	1.07143e-77	0.412028	0.696	0.551	1.67647e-73	ILC2	Uqcrh
Exoc3	1.13932e-77	0.771678	0.279	0.16	1.7827e-73	ILC2	Exoc3
Itga4	1.16191e-77	0.772322	0.372	0.244	1.81804e-73	ILC2	Itga4
Synj1	1.30478e-77	1.43575	0.118	0.044	2.04159e-73	ILC2	Synj1
Lonrf1	1.73032e-77	3.13585	0.04	0.004	2.70744e-73	ILC2	Lonrf1
Rel	1.98714e-77	0.691199	0.542	0.42	3.10927e-73	ILC2	Rel
Pde7a	2.13577e-77	0.880864	0.254	0.142	3.34184e-73	ILC2	Pde7a
Ahcyl2	3.24062e-77	0.654656	0.359	0.227	5.0706e-73	ILC2	Ahcyl2
Bcap31	3.33834e-77	0.590293	0.436	0.296	5.2235e-73	ILC2	Bcap31
Rheb	3.31823e-76	0.596875	0.45	0.309	5.19204e-72	ILC2	Rheb
Ppp2r5c	5.59786e-76	0.648736	0.37	0.238	8.75897e-72	ILC2	Ppp2r5c
Mdh1	7.75579e-76	0.571929	0.465	0.325	1.21355e-71	ILC2	Mdh1
Pde3b	2.56216e-75	0.898972	0.22	0.116	4.00902e-71	ILC2	Pde3b
Eif3m	2.56913e-75	0.464212	0.541	0.39	4.01992e-71	ILC2	Eif3m
mt-Co3	2.62876e-75	0.192004	0.999	0.999	4.11322e-71	ILC2	mt-Co3
Dock1	4.77535e-75	5.62095	0.027	0.001	7.47199e-71	ILC2	Dock1
Hist1h2bc	5.01251e-75	1.97852	0.076	0.021	7.84308e-71	ILC2	Hist1h2bc
Pik3ip1	1.19341e-74	1.79575	0.08	0.023	1.86733e-70	ILC2	Pik3ip1
P2ry14	2.47389e-74	2.86958	0.043	0.006	3.87089e-70	ILC2	P2ry14
Pfdn5	2.80581e-74	0.37683	0.726	0.582	4.39026e-70	ILC2	Pfdn5
Radx	3.16307e-74	3.91653	0.033	0.002	4.94925e-70	ILC2	Radx
Lpar6	3.997e-74	1.01285	0.23	0.126	6.25411e-70	ILC2	Lpar6
Crtap	1.26111e-73	2.11939	0.061	0.014	1.97326e-69	ILC2	Crtap
Chrne	1.33538e-73	2.3976	0.055	0.011	2.08947e-69	ILC2	Chrne
Ubash3a	1.60376e-73	2.1228	0.06	0.013	2.5094e-69	ILC2	Ubash3a
Dipk1a	2.69574e-73	2.37325	0.054	0.01	4.21802e-69	ILC2	Dipk1a
Gm20400	3.33661e-73	0.929022	0.184	0.09	5.22079e-69	ILC2	Gm20400
Xxylt1	4.90308e-73	1.81943	0.077	0.022	7.67185e-69	ILC2	Xxylt1
Scin	2.21044e-72	4.23122	0.032	0.002	3.45867e-68	ILC2	Scin
Tob2	2.32423e-72	0.443388	0.68	0.549	3.63672e-68	ILC2	Tob2
Nt5c	5.11865e-72	0.897377	0.219	0.118	8.00915e-68	ILC2	Nt5c
AC149090.1	6.03462e-72	0.758683	0.288	0.173	9.44237e-68	ILC2	AC149090.1
Tomm20	7.21859e-72	0.445907	0.589	0.442	1.12949e-67	ILC2	Tomm20
Kcnd2	7.42105e-72	4.59968	0.028	0.001	1.16117e-67	ILC2	Kcnd2
Eif4b	8.3245e-72	0.612131	0.383	0.254	1.30253e-67	ILC2	Eif4b
Atp2a2	8.35907e-72	0.773616	0.298	0.181	1.30794e-67	ILC2	Atp2a2
Pwp1	8.82375e-72	1.54497	0.108	0.04	1.38065e-67	ILC2	Pwp1
Ldlrad4	1.55831e-71	1.34697	0.134	0.057	2.43829e-67	ILC2	Ldlrad4
Ptger4	2.6562e-71	1.26861	0.124	0.05	4.15615e-67	ILC2	Ptger4
Ddx24	3.62146e-71	0.63687	0.385	0.257	5.6665e-67	ILC2	Ddx24
Mzt1	4.33674e-71	1.06816	0.178	0.088	6.78569e-67	ILC2	Mzt1
Smchd1	5.56937e-71	0.76634	0.306	0.189	8.71439e-67	ILC2	Smchd1
Aig1	5.80754e-71	1.35832	0.108	0.04	9.08706e-67	ILC2	Aig1
Spcs2	9.60491e-71	0.419832	0.616	0.467	1.50288e-66	ILC2	Spcs2
Mfge8	1.81051e-70	1.88355	0.069	0.018	2.8329e-66	ILC2	Mfge8
Ypel2	2.02138e-70	2.07442	0.069	0.019	3.16285e-66	ILC2	Ypel2
Ncf4	2.729e-70	1.55631	0.093	0.031	4.27007e-66	ILC2	Ncf4
Eif3k	1.14771e-69	0.442668	0.551	0.406	1.79582e-65	ILC2	Eif3k
Pitpnc1	1.22202e-69	0.79702	0.226	0.124	1.9121e-65	ILC2	Pitpnc1
Ctsz	1.53793e-69	1.04607	0.172	0.084	2.4064e-65	ILC2	Ctsz
Gfi1	3.56816e-69	2.77155	0.041	0.006	5.5831e-65	ILC2	Gfi1
Sik1	3.99272e-69	0.445756	0.554	0.412	6.2474e-65	ILC2	Sik1
Cast	1.2679e-68	0.598509	0.363	0.238	1.98388e-64	ILC2	Cast
Rtraf	1.33746e-68	0.630901	0.337	0.214	2.09273e-64	ILC2	Rtraf
A630072M18Rik	2.11062e-68	1.36489	0.124	0.052	3.30248e-64	ILC2	A630072M18Rik
Siah2	2.52929e-68	0.669607	0.332	0.212	3.95758e-64	ILC2	Siah2
Gkap1	5.68125e-68	2.44174	0.047	0.008	8.88945e-64	ILC2	Gkap1
Tnfaip3	7.6604e-68	0.283181	0.965	0.962	1.19862e-63	ILC2	Tnfaip3
Aimp1	8.45055e-68	0.802051	0.243	0.139	1.32226e-63	ILC2	Aimp1
Tnfsf14	8.63357e-68	1.19862	0.132	0.057	1.35089e-63	ILC2	Tnfsf14
Atp13a3	1.31395e-67	1.09678	0.154	0.073	2.05593e-63	ILC2	Atp13a3
Cpsf6	1.64926e-67	0.87654	0.235	0.133	2.58059e-63	ILC2	Cpsf6
Tnfsf10	2.02535e-67	1.43713	0.099	0.036	3.16906e-63	ILC2	Tnfsf10
AB124611	2.34265e-67	4.17029	0.028	0.002	3.66555e-63	ILC2	AB124611
Gbp3	5.96823e-67	1.79856	0.074	0.022	9.33848e-63	ILC2	Gbp3
Ccm2	9.10914e-67	0.93335	0.203	0.109	1.42531e-62	ILC2	Ccm2
Cnnm2	1.29187e-66	0.676361	0.314	0.197	2.02139e-62	ILC2	Cnnm2
Psmb1	1.55422e-66	0.406318	0.574	0.43	2.43189e-62	ILC2	Psmb1
Arih1	1.81677e-66	0.638392	0.423	0.298	2.8427e-62	ILC2	Arih1
Ap1s3	5.8374e-66	2.1105	0.055	0.012	9.13379e-62	ILC2	Ap1s3
Enah	5.95445e-66	5.16064	0.025	0.001	9.31693e-62	ILC2	Enah
mt-Atp8	8.27006e-66	0.495438	0.481	0.348	1.29402e-61	ILC2	mt-Atp8
Man1a	1.80418e-65	0.730335	0.306	0.194	2.823e-61	ILC2	Man1a
Pabpc4	1.88653e-65	0.895505	0.203	0.11	2.95185e-61	ILC2	Pabpc4
Cish	1.90374e-65	0.472447	0.51	0.371	2.97879e-61	ILC2	Cish
Spata13	2.3148e-65	1.94307	0.061	0.015	3.62197e-61	ILC2	Spata13
Rusc1	3.48084e-65	1.24203	0.133	0.059	5.44647e-61	ILC2	Rusc1
Mc5r	3.79941e-65	5.40295	0.023	0	5.94494e-61	ILC2	Mc5r
Gramd4	5.28124e-65	1.59121	0.081	0.027	8.26356e-61	ILC2	Gramd4
Tut4	9.56886e-65	0.391744	0.632	0.492	1.49724e-60	ILC2	Tut4
Gm5127	1.11153e-64	3.095	0.034	0.004	1.73921e-60	ILC2	Gm5127
Bbs9	1.53335e-64	1.76904	0.073	0.022	2.39923e-60	ILC2	Bbs9
Nudt3	2.7578e-64	1.12726	0.141	0.065	4.31514e-60	ILC2	Nudt3
Sdf4	2.97228e-64	0.481789	0.483	0.35	4.65073e-60	ILC2	Sdf4
Tsen15	3.59316e-64	1.54296	0.088	0.031	5.62222e-60	ILC2	Tsen15
Esyt2	8.32971e-64	0.516497	0.441	0.311	1.30335e-59	ILC2	Esyt2
Rem2	1.68439e-63	4.83975	0.025	0.001	2.63556e-59	ILC2	Rem2
Rcc2	2.88172e-63	0.728353	0.275	0.168	4.50903e-59	ILC2	Rcc2
Abhd17b	5.30759e-63	0.812309	0.253	0.152	8.30479e-59	ILC2	Abhd17b
4930417O13Rik	9.98643e-63	2.73335	0.039	0.006	1.56258e-58	ILC2	4930417O13Rik
Sh3bgrl	1.03008e-62	0.766198	0.248	0.146	1.61176e-58	ILC2	Sh3bgrl
Chsy3	3.89222e-62	3.0999	0.034	0.004	6.09015e-58	ILC2	Chsy3
Rab26os	4.74064e-62	1.3249	0.104	0.041	7.41768e-58	ILC2	Rab26os
Man1b1	4.90203e-62	1.09166	0.149	0.072	7.6702e-58	ILC2	Man1b1
1700061F12Rik	5.20701e-62	6.31506	0.022	0	8.14741e-58	ILC2	1700061F12Rik
Rpl10	6.91687e-62	0.186296	0.995	0.979	1.08228e-57	ILC2	Rpl10
Osm	8.34446e-62	3.8214	0.029	0.003	1.30566e-57	ILC2	Osm
Tomm34	8.8168e-62	0.870982	0.207	0.115	1.37956e-57	ILC2	Tomm34
Ywhab	1.46837e-61	0.529727	0.418	0.293	2.29756e-57	ILC2	Ywhab
Ubash3b	1.9122e-61	1.07699	0.147	0.071	2.99202e-57	ILC2	Ubash3b
Nfix	2.58386e-61	3.13524	0.031	0.003	4.04297e-57	ILC2	Nfix
Gnai3	2.97037e-61	0.561389	0.372	0.252	4.64775e-57	ILC2	Gnai3
Ppp1r18	3.56753e-61	0.547297	0.353	0.233	5.58212e-57	ILC2	Ppp1r18
AU020206	1.21197e-60	0.472669	0.454	0.325	1.89637e-56	ILC2	AU020206
Nucb2	1.30196e-60	6.19414	0.021	0	2.03717e-56	ILC2	Nucb2
Dach2	2.33871e-60	4.72283	0.023	0.001	3.65939e-56	ILC2	Dach2
Mbd1	3.03376e-60	1.10034	0.132	0.061	4.74693e-56	ILC2	Mbd1
Snrpf	3.3551e-60	0.407668	0.57	0.438	5.24972e-56	ILC2	Snrpf
Btf3	3.5176e-60	0.300139	0.82	0.712	5.50399e-56	ILC2	Btf3
Chd2	5.66599e-60	0.491763	0.489	0.361	8.86558e-56	ILC2	Chd2
Abhd14a	6.90346e-60	1.61435	0.077	0.025	1.08018e-55	ILC2	Abhd14a
P4ha2	1.02567e-59	2.38158	0.044	0.008	1.60487e-55	ILC2	P4ha2
Unc5b	2.05861e-59	6.56108	0.02	0	3.22111e-55	ILC2	Unc5b
Dtnbp1	2.28643e-59	1.02312	0.162	0.083	3.57757e-55	ILC2	Dtnbp1
Ptp4a2	2.38966e-59	0.398574	0.578	0.448	3.73911e-55	ILC2	Ptp4a2
Metrnl	3.0892e-59	1.55543	0.082	0.029	4.83367e-55	ILC2	Metrnl
Atp5md	3.5466e-59	0.36261	0.768	0.662	5.54936e-55	ILC2	Atp5md
Dennd2d	4.73979e-59	1.38869	0.091	0.034	7.41636e-55	ILC2	Dennd2d
Naip6	5.08339e-59	3.16083	0.031	0.003	7.95398e-55	ILC2	Naip6
Fbl	6.06376e-59	0.73143	0.275	0.173	9.48797e-55	ILC2	Fbl
Nup98	1.14205e-58	0.560667	0.367	0.25	1.78697e-54	ILC2	Nup98
D430036J16Rik	1.19657e-58	5.73372	0.021	0	1.87227e-54	ILC2	D430036J16Rik
Akap12	1.24053e-58	3.45206	0.032	0.004	1.94106e-54	ILC2	Akap12
Enpp5	1.37338e-58	0.91909	0.182	0.098	2.14892e-54	ILC2	Enpp5
Arl5c	1.7699e-58	0.881941	0.242	0.146	2.76936e-54	ILC2	Arl5c
Meis3	2.11333e-58	1.79662	0.06	0.016	3.30673e-54	ILC2	Meis3
Tap1	2.98817e-58	0.799537	0.198	0.11	4.67559e-54	ILC2	Tap1
Gm43445	3.89953e-58	3.14311	0.03	0.003	6.10159e-54	ILC2	Gm43445
Nsd3	4.01545e-58	0.49758	0.487	0.364	6.28298e-54	ILC2	Nsd3
Btaf1	4.62374e-58	0.759617	0.244	0.147	7.23476e-54	ILC2	Btaf1
Src	4.78018e-58	1.75264	0.063	0.018	7.47954e-54	ILC2	Src
Mov10	5.18374e-58	1.75525	0.066	0.02	8.111e-54	ILC2	Mov10
Lsm6	5.3527e-58	0.839105	0.201	0.113	8.37537e-54	ILC2	Lsm6
Gfpt2	5.89532e-58	5.39856	0.021	0	9.22441e-54	ILC2	Gfpt2
Rras2	7.01686e-58	1.59811	0.07	0.022	1.09793e-53	ILC2	Rras2
Slc25a25	1.14258e-57	1.08437	0.125	0.057	1.7878e-53	ILC2	Slc25a25
Plaat3	1.49652e-57	0.471479	0.433	0.307	2.3416e-53	ILC2	Plaat3
Fkbp5	1.63645e-57	0.943842	0.169	0.089	2.56055e-53	ILC2	Fkbp5
Emg1	1.67568e-57	0.521564	0.374	0.256	2.62194e-53	ILC2	Emg1
Sp100	1.72096e-57	0.669128	0.273	0.171	2.69278e-53	ILC2	Sp100
Appl1	2.59715e-57	0.669326	0.289	0.185	4.06376e-53	ILC2	Appl1
Anapc16	3.00482e-57	0.80349	0.21	0.12	4.70164e-53	ILC2	Anapc16
Miga1	3.55127e-57	2.54922	0.037	0.006	5.55668e-53	ILC2	Miga1
Dyrk3	3.60156e-57	1.08605	0.12	0.053	5.63535e-53	ILC2	Dyrk3
Use1	5.59964e-57	0.437553	0.465	0.337	8.76175e-53	ILC2	Use1
Cox7a2	6.25238e-57	0.416489	0.519	0.392	9.7831e-53	ILC2	Cox7a2
Ndufb5	7.34895e-57	0.601817	0.315	0.206	1.14989e-52	ILC2	Ndufb5
Cct5	8.90487e-57	0.508012	0.399	0.28	1.39335e-52	ILC2	Cct5
Dctn6	1.04162e-56	0.830759	0.204	0.116	1.62982e-52	ILC2	Dctn6
Pcbp2	1.09867e-56	0.309366	0.782	0.666	1.71909e-52	ILC2	Pcbp2
Lsamp	1.85585e-56	3.73818	0.027	0.002	2.90385e-52	ILC2	Lsamp
Gm2000	2.06605e-56	1.49203	0.08	0.028	3.23275e-52	ILC2	Gm2000
Zfp131	2.29928e-56	0.708016	0.265	0.165	3.59769e-52	ILC2	Zfp131
Mgat5	8.68306e-56	0.57651	0.325	0.216	1.35864e-51	ILC2	Mgat5
Zfp981	1.08167e-55	0.659261	0.3	0.196	1.69249e-51	ILC2	Zfp981
Gas2l3	1.32924e-55	2.47113	0.04	0.007	2.07986e-51	ILC2	Gas2l3
mt-Co2	1.5387e-55	0.207087	0.987	0.975	2.40761e-51	ILC2	mt-Co2
Atp5j2	3.66593e-55	0.489203	0.401	0.282	5.73608e-51	ILC2	Atp5j2
Il10ra	5.40667e-55	2.6284	0.037	0.006	8.45982e-51	ILC2	Il10ra
Rpl36al	5.73519e-55	0.359103	0.614	0.483	8.97385e-51	ILC2	Rpl36al
Slc39a13	5.80302e-55	2.59524	0.036	0.006	9.07999e-51	ILC2	Slc39a13
Runx1	6.25631e-55	0.561162	0.368	0.255	9.78925e-51	ILC2	Runx1
Aff1	6.56475e-55	0.610365	0.313	0.207	1.02719e-50	ILC2	Aff1
Gpx7	8.39159e-55	3.05596	0.031	0.004	1.31303e-50	ILC2	Gpx7
D030028A08Rik	1.09233e-54	2.21058	0.046	0.011	1.70918e-50	ILC2	D030028A08Rik
Txn1	1.81148e-54	0.403465	0.468	0.342	2.83442e-50	ILC2	Txn1
Jchain	3.45101e-54	0.580355	0.314	0.207	5.39979e-50	ILC2	Jchain
Nme2	4.59422e-54	0.68931	0.263	0.166	7.18858e-50	ILC2	Nme2
Mllt3	6.37938e-54	0.693232	0.239	0.145	9.98181e-50	ILC2	Mllt3
Epb41l1	6.63301e-54	2.33138	0.04	0.008	1.03787e-49	ILC2	Epb41l1
Epcam	7.61939e-54	1.77537	0.06	0.018	1.19221e-49	ILC2	Epcam
Ndufa4	1.02045e-53	0.382753	0.542	0.409	1.5967e-49	ILC2	Ndufa4
Nr4a1	1.19347e-53	0.45682	0.89	0.887	1.86743e-49	ILC2	Nr4a1
Mthfd1l	1.20975e-53	1.56997	0.065	0.021	1.8929e-49	ILC2	Mthfd1l
Map2k3	1.90024e-53	0.82557	0.197	0.113	2.97331e-49	ILC2	Map2k3
Eva1b	2.24719e-53	1.33725	0.084	0.032	3.51619e-49	ILC2	Eva1b
Fam118b	2.31962e-53	1.78366	0.054	0.015	3.62951e-49	ILC2	Fam118b
Zdhhc18	4.51715e-53	0.604919	0.285	0.183	7.06798e-49	ILC2	Zdhhc18
Setdb2	5.45915e-53	1.45197	0.084	0.032	8.54194e-49	ILC2	Setdb2
Ifi27	7.12904e-53	0.698639	0.256	0.161	1.11548e-48	ILC2	Ifi27
Ncl	7.88509e-53	0.248382	0.928	0.876	1.23378e-48	ILC2	Ncl
Msn	8.78193e-53	0.378241	0.483	0.353	1.37411e-48	ILC2	Msn
9230102O04Rik	1.10257e-52	6.10889	0.018	0	1.72519e-48	ILC2	9230102O04Rik
Ikbip	1.48201e-52	1.33366	0.089	0.035	2.3189e-48	ILC2	Ikbip
Gm11361	1.68694e-52	1.51689	0.073	0.026	2.63956e-48	ILC2	Gm11361
Adpgk	1.9355e-52	0.9848	0.137	0.068	3.02848e-48	ILC2	Adpgk
Pard3b	2.25184e-52	3.72283	0.024	0.002	3.52346e-48	ILC2	Pard3b
Ppp1cc	4.05118e-52	0.311564	0.694	0.563	6.33888e-48	ILC2	Ppp1cc
Fermt3	4.5729e-52	0.52621	0.356	0.246	7.15522e-48	ILC2	Fermt3
Zfp704	6.50129e-52	2.34697	0.037	0.007	1.01726e-47	ILC2	Zfp704
Ngly1	6.6664e-52	0.938574	0.145	0.074	1.04309e-47	ILC2	Ngly1
Unc45a	7.53298e-52	0.763757	0.22	0.132	1.17869e-47	ILC2	Unc45a
Arl14ep	9.92185e-52	1.53548	0.071	0.024	1.55247e-47	ILC2	Arl14ep
Ggh	1.39452e-51	1.14483	0.143	0.073	2.182e-47	ILC2	Ggh
Sys1	1.56106e-51	0.681619	0.244	0.151	2.44259e-47	ILC2	Sys1
Atp5o.1	1.70774e-51	0.515169	0.342	0.233	2.6721e-47	ILC2	Atp5o.1
Psmb8	2.08705e-51	0.399973	0.503	0.375	3.26561e-47	ILC2	Psmb8
Anp32b	2.68674e-51	0.442259	0.453	0.337	4.20394e-47	ILC2	Anp32b
Nprl3	2.84092e-51	1.6067	0.069	0.024	4.44518e-47	ILC2	Nprl3
Evi2a	3.38028e-51	0.695216	0.232	0.142	5.28913e-47	ILC2	Evi2a
Elk4	3.87624e-51	0.73824	0.219	0.132	6.06516e-47	ILC2	Elk4
Samd9l	5.32042e-51	0.645075	0.244	0.151	8.32486e-47	ILC2	Samd9l
Gm11808	8.19406e-51	1.31004	0.087	0.035	1.28212e-46	ILC2	Gm11808
Skp1a	1.00691e-50	0.382653	0.511	0.388	1.57551e-46	ILC2	Skp1a
Jcad	1.035e-50	4.65572	0.02	0.001	1.61946e-46	ILC2	Jcad
Hivep2	1.30877e-50	0.60988	0.298	0.198	2.04783e-46	ILC2	Hivep2
Rac2	2.25098e-50	0.276566	0.716	0.58	3.52211e-46	ILC2	Rac2
Dcaf7	2.2809e-50	1.14822	0.117	0.055	3.56893e-46	ILC2	Dcaf7
Ncoa1	3.49278e-50	0.915477	0.149	0.078	5.46515e-46	ILC2	Ncoa1
Cuedc1	5.29435e-50	1.59015	0.062	0.02	8.28407e-46	ILC2	Cuedc1
Casc4	5.69747e-50	2.9756	0.026	0.003	8.91483e-46	ILC2	Casc4
Sox8	1.10793e-49	5.76165	0.018	0	1.73357e-45	ILC2	Sox8
Prag1	1.19923e-49	2.61704	0.032	0.005	1.87644e-45	ILC2	Prag1
Cfdp1	1.2629e-49	0.681249	0.214	0.128	1.97606e-45	ILC2	Cfdp1
Apbb2	1.86904e-49	4.16462	0.02	0.001	2.92448e-45	ILC2	Apbb2
Hacd3	2.36285e-49	0.786199	0.203	0.121	3.69715e-45	ILC2	Hacd3
Nin	2.52434e-49	0.818844	0.175	0.098	3.94983e-45	ILC2	Nin
Sod1	4.38459e-49	0.409384	0.429	0.311	6.86057e-45	ILC2	Sod1
Kdsr	4.50821e-49	1.11831	0.111	0.052	7.054e-45	ILC2	Kdsr
Gm47922	5.48755e-49	5.96384	0.017	0	8.58636e-45	ILC2	Gm47922
Pik3c2a	6.44911e-49	1.48349	0.065	0.022	1.00909e-44	ILC2	Pik3c2a
Cers2	6.72681e-49	0.713462	0.217	0.131	1.05254e-44	ILC2	Cers2
Naip2	1.00278e-48	2.55618	0.032	0.005	1.56904e-44	ILC2	Naip2
Micos13	1.03992e-48	0.625154	0.246	0.155	1.62717e-44	ILC2	Micos13
Cfap20	1.63925e-48	0.886655	0.162	0.089	2.56494e-44	ILC2	Cfap20
Baz1a	2.11434e-48	0.558601	0.345	0.242	3.30831e-44	ILC2	Baz1a
Rrm2b	2.29627e-48	0.663778	0.229	0.141	3.59297e-44	ILC2	Rrm2b
Acadl	3.75641e-48	0.547842	0.314	0.214	5.87765e-44	ILC2	Acadl
Gm4070	5.36906e-48	1.0461	0.115	0.055	8.40096e-44	ILC2	Gm4070
Tle1	5.39614e-48	1.99669	0.042	0.01	8.44335e-44	ILC2	Tle1
Impdh2	7.18743e-48	0.504896	0.407	0.295	1.12462e-43	ILC2	Impdh2
Kmt2c	7.83414e-48	0.514848	0.321	0.218	1.22581e-43	ILC2	Kmt2c
Cyth3	9.8991e-48	1.51906	0.071	0.026	1.54891e-43	ILC2	Cyth3
Fam216a	1.06303e-47	1.18951	0.098	0.043	1.66332e-43	ILC2	Fam216a
Csk	1.1513e-47	0.495311	0.358	0.253	1.80144e-43	ILC2	Csk
Matk	1.25198e-47	3.19538	0.024	0.002	1.95898e-43	ILC2	Matk
Impa2	1.50007e-47	1.64191	0.062	0.021	2.34716e-43	ILC2	Impa2
Pi4ka	1.5651e-47	0.940066	0.134	0.069	2.44891e-43	ILC2	Pi4ka
Eif3h	2.59782e-47	0.307723	0.65	0.528	4.0648e-43	ILC2	Eif3h
Dph5	2.94042e-47	1.13216	0.099	0.044	4.60087e-43	ILC2	Dph5
Mpped2	3.13832e-47	3.17029	0.023	0.002	4.91053e-43	ILC2	Mpped2
Huwe1	3.68508e-47	0.518431	0.316	0.216	5.76605e-43	ILC2	Huwe1
Gclm	6.1751e-47	1.08825	0.105	0.049	9.66218e-43	ILC2	Gclm
Tktl1	7.08729e-47	5.87811	0.016	0	1.10895e-42	ILC2	Tktl1
Dhx40	7.51568e-47	0.601884	0.335	0.235	1.17598e-42	ILC2	Dhx40
Dok2	8.42074e-47	0.852676	0.156	0.085	1.31759e-42	ILC2	Dok2
Fndc3a	1.05669e-46	0.618798	0.256	0.166	1.6534e-42	ILC2	Fndc3a
Atp5l	1.06087e-46	0.316829	0.644	0.525	1.65994e-42	ILC2	Atp5l
Plpp5	1.10224e-46	1.44679	0.071	0.026	1.72468e-42	ILC2	Plpp5
Rps6ka1	1.18149e-46	1.05889	0.113	0.054	1.84868e-42	ILC2	Rps6ka1
Ntng2	1.90695e-46	2.01293	0.043	0.011	2.9838e-42	ILC2	Ntng2
Stim1	1.91453e-46	0.583158	0.281	0.187	2.99566e-42	ILC2	Stim1
Rtf1	2.47184e-46	0.632907	0.243	0.155	3.86769e-42	ILC2	Rtf1
Utp14a	6.92058e-46	0.967033	0.128	0.065	1.08286e-41	ILC2	Utp14a
Scamp1	7.67838e-46	2.7092	0.027	0.004	1.20144e-41	ILC2	Scamp1
Kidins220	7.8245e-46	0.863422	0.148	0.08	1.2243e-41	ILC2	Kidins220
Tomm7	8.58901e-46	0.376425	0.504	0.387	1.34392e-41	ILC2	Tomm7
Phgdh	1.30867e-45	1.37834	0.072	0.027	2.04768e-41	ILC2	Phgdh
Atp1b1	1.3188e-45	2.39708	0.034	0.007	2.06353e-41	ILC2	Atp1b1
Vmp1	1.32059e-45	0.610836	0.249	0.16	2.06633e-41	ILC2	Vmp1
Galnt6	1.38852e-45	1.39196	0.069	0.026	2.17262e-41	ILC2	Galnt6
Gm50240	1.69427e-45	1.30164	0.078	0.031	2.65103e-41	ILC2	Gm50240
Bcl2l11	2.02291e-45	0.691232	0.195	0.116	3.16525e-41	ILC2	Bcl2l11
Plec	3.04505e-45	1.58984	0.063	0.022	4.76458e-41	ILC2	Plec
Bola2	3.54042e-45	0.751518	0.175	0.101	5.5397e-41	ILC2	Bola2
Galnt7	4.31799e-45	0.866547	0.154	0.085	6.75636e-41	ILC2	Galnt7
Arl5b	5.2529e-45	0.659309	0.256	0.168	8.21921e-41	ILC2	Arl5b
Nbn	5.76575e-45	0.662127	0.237	0.152	9.02168e-41	ILC2	Nbn
Ddah1	5.9231e-45	1.76898	0.047	0.014	9.26787e-41	ILC2	Ddah1
Dusp1	6.98705e-45	0.277659	0.88	0.824	1.09326e-40	ILC2	Dusp1
Serbp1	8.68104e-45	0.297192	0.673	0.554	1.35832e-40	ILC2	Serbp1
Snhg6	8.78287e-45	0.70465	0.204	0.124	1.37426e-40	ILC2	Snhg6
Nedd9	1.13216e-44	0.428764	0.323	0.222	1.77148e-40	ILC2	Nedd9
Mctp1	1.60833e-44	4.23915	0.018	0.001	2.51655e-40	ILC2	Mctp1
D8Ertd738e	1.867e-44	0.345704	0.517	0.398	2.92129e-40	ILC2	D8Ertd738e
Pigp	2.03749e-44	0.691428	0.183	0.107	3.18807e-40	ILC2	Pigp
Nop56	2.57154e-44	0.512448	0.308	0.212	4.02368e-40	ILC2	Nop56
Dtx1	2.63406e-44	0.732886	0.184	0.109	4.12152e-40	ILC2	Dtx1
Selenof	2.71632e-44	0.394488	0.465	0.355	4.25022e-40	ILC2	Selenof
Mbd5	2.90688e-44	1.03961	0.113	0.056	4.54839e-40	ILC2	Mbd5
Coro1a	3.09452e-44	0.255568	0.7	0.567	4.842e-40	ILC2	Coro1a
Hif1a	3.57139e-44	0.570833	0.295	0.202	5.58816e-40	ILC2	Hif1a
Ralbp1	3.91285e-44	0.520066	0.288	0.194	6.12244e-40	ILC2	Ralbp1
Sh3pxd2a	4.64374e-44	2.92798	0.024	0.003	7.26606e-40	ILC2	Sh3pxd2a
Eef1aknmt	4.75061e-44	2.12254	0.037	0.009	7.43327e-40	ILC2	Eef1aknmt
Rfx7	5.43155e-44	0.759221	0.187	0.112	8.49874e-40	ILC2	Rfx7
Rasgrp2	5.72869e-44	1.31455	0.077	0.031	8.96368e-40	ILC2	Rasgrp2
Nudcd3	6.92976e-44	0.611239	0.242	0.156	1.0843e-39	ILC2	Nudcd3
Epb41l4aos	7.01085e-44	0.944041	0.127	0.066	1.09699e-39	ILC2	Epb41l4aos
Tapbp	7.36124e-44	0.572176	0.269	0.179	1.15181e-39	ILC2	Tapbp
H3f3b	7.5361e-44	0.264899	0.992	0.995	1.17917e-39	ILC2	H3f3b
Decr1	7.56322e-44	1.15246	0.091	0.041	1.18342e-39	ILC2	Decr1
Tnfrsf9	7.83591e-44	0.751184	0.186	0.112	1.22608e-39	ILC2	Tnfrsf9
Notch2	9.81968e-44	1.14135	0.099	0.046	1.53649e-39	ILC2	Notch2
mt-Nd1	1.34261e-43	0.174327	0.984	0.973	2.10079e-39	ILC2	mt-Nd1
Trim25	1.43369e-43	1.39148	0.067	0.025	2.2433e-39	ILC2	Trim25
Rasal3	1.44851e-43	0.5552	0.277	0.186	2.26648e-39	ILC2	Rasal3
Gngt2	1.50534e-43	0.990313	0.113	0.056	2.3554e-39	ILC2	Gngt2
Arhgef12	2.08137e-43	2.4501	0.03	0.005	3.25672e-39	ILC2	Arhgef12
Zfp36	2.12617e-43	0.457247	0.725	0.628	3.32681e-39	ILC2	Zfp36
Dync1h1	2.21121e-43	0.729298	0.185	0.11	3.45988e-39	ILC2	Dync1h1
Atpif1	2.52657e-43	0.738271	0.187	0.112	3.95333e-39	ILC2	Atpif1
Fzd4	3.10419e-43	1.8273	0.043	0.012	4.85713e-39	ILC2	Fzd4
Myo1d	3.13077e-43	3.20021	0.022	0.002	4.89871e-39	ILC2	Myo1d
Mettl23	3.25631e-43	0.720722	0.191	0.115	5.09515e-39	ILC2	Mettl23
Ebpl	3.30044e-43	1.15451	0.09	0.04	5.1642e-39	ILC2	Ebpl
Abcc8	3.49137e-43	5.78696	0.015	0	5.46295e-39	ILC2	Abcc8
Il2rg	3.98018e-43	0.259368	0.819	0.717	6.22778e-39	ILC2	Il2rg
Mrpl32	4.63672e-43	0.639813	0.221	0.14	7.25507e-39	ILC2	Mrpl32
Eif3i	5.23664e-43	0.439537	0.376	0.273	8.19378e-39	ILC2	Eif3i
Calm3	6.65931e-43	0.575257	0.258	0.171	1.04198e-38	ILC2	Calm3
Pkia	6.96972e-43	4.33665	0.017	0.001	1.09055e-38	ILC2	Pkia
Tex9	8.06721e-43	1.60207	0.053	0.017	1.26228e-38	ILC2	Tex9
Kdm1a	1.04302e-42	0.72381	0.194	0.118	1.63202e-38	ILC2	Kdm1a
Il2	1.47578e-42	1.46693	0.064	0.024	2.30915e-38	ILC2	Il2
Ppfia1	1.5065e-42	0.536478	0.33	0.235	2.35722e-38	ILC2	Ppfia1
Cct2	1.70616e-42	0.396861	0.425	0.317	2.66963e-38	ILC2	Cct2
Asxl2	2.17986e-42	0.707384	0.184	0.11	3.41083e-38	ILC2	Asxl2
Cct7	2.87948e-42	0.432621	0.37	0.268	4.50552e-38	ILC2	Cct7
Fam104a	2.94625e-42	0.633366	0.209	0.13	4.61e-38	ILC2	Fam104a
Rgs12	3.66983e-42	1.16976	0.082	0.035	5.74218e-38	ILC2	Rgs12
Plcb2	3.948e-42	0.986331	0.112	0.056	6.17743e-38	ILC2	Plcb2
4921511I17Rik	3.95474e-42	5.84836	0.015	0	6.18798e-38	ILC2	4921511I17Rik
Dtnb	3.95944e-42	0.979681	0.114	0.057	6.19534e-38	ILC2	Dtnb
Herc4	4.23812e-42	0.912246	0.135	0.073	6.63139e-38	ILC2	Herc4
Irak3	4.56859e-42	0.613666	0.204	0.126	7.14848e-38	ILC2	Irak3
Ppia	4.60521e-42	0.169836	0.992	0.989	7.20578e-38	ILC2	Ppia
Snhg15	7.72576e-42	0.464117	0.345	0.247	1.20885e-37	ILC2	Snhg15
Nme1	8.21885e-42	0.571322	0.283	0.194	1.286e-37	ILC2	Nme1
Gm26708	8.95935e-42	3.13076	0.022	0.002	1.40187e-37	ILC2	Gm26708
Csf1	1.04946e-41	2.70664	0.026	0.004	1.64208e-37	ILC2	Csf1
Adcy3	1.12943e-41	2.07076	0.035	0.008	1.76721e-37	ILC2	Adcy3
9130401M01Rik	1.19207e-41	0.937865	0.117	0.059	1.86523e-37	ILC2	9130401M01Rik
Gm1976	1.19512e-41	1.71835	0.046	0.014	1.87e-37	ILC2	Gm1976
Arhgef1	1.34278e-41	0.340984	0.464	0.351	2.10105e-37	ILC2	Arhgef1
Fam92a	1.62525e-41	1.29037	0.069	0.027	2.54302e-37	ILC2	Fam92a
Psip1	1.73914e-41	0.495722	0.305	0.212	2.72123e-37	ILC2	Psip1
Noc2l	1.97507e-41	0.855109	0.144	0.08	3.09039e-37	ILC2	Noc2l
Pdcd5	2.15005e-41	0.641858	0.201	0.124	3.36418e-37	ILC2	Pdcd5
Sytl3	2.18691e-41	0.405948	0.485	0.378	3.42186e-37	ILC2	Sytl3
Son	2.75598e-41	0.268758	0.655	0.536	4.31229e-37	ILC2	Son
Gm12316	5.38589e-41	3.71591	0.018	0.001	8.4273e-37	ILC2	Gm12316
Cdk6	6.19543e-41	1.49247	0.058	0.021	9.69398e-37	ILC2	Cdk6
Adam8	6.61052e-41	1.37856	0.06	0.022	1.03435e-36	ILC2	Adam8
Gm32401	8.18458e-41	2.70664	0.025	0.004	1.28064e-36	ILC2	Gm32401
Rhog	8.37475e-41	0.331582	0.471	0.358	1.3104e-36	ILC2	Rhog
Abcb1b	1.01988e-40	0.615119	0.173	0.102	1.59581e-36	ILC2	Abcb1b
Gm30211	1.38126e-40	0.70236	0.163	0.095	2.16125e-36	ILC2	Gm30211
Atp5b	1.50086e-40	0.28609	0.686	0.579	2.34839e-36	ILC2	Atp5b
Sytl2	2.21119e-40	1.52644	0.054	0.018	3.45985e-36	ILC2	Sytl2
Rexo5	2.78889e-40	1.36345	0.065	0.025	4.36377e-36	ILC2	Rexo5
Car8	3.38045e-40	5.31651	0.014	0	5.28939e-36	ILC2	Car8
4930579G24Rik	3.63915e-40	2.25658	0.033	0.007	5.69417e-36	ILC2	4930579G24Rik
Tcf25	4.04247e-40	0.341035	0.495	0.385	6.32525e-36	ILC2	Tcf25
Tfdp1	4.41154e-40	1.41208	0.058	0.021	6.90274e-36	ILC2	Tfdp1
Pak1	4.90705e-40	1.57519	0.05	0.016	7.67806e-36	ILC2	Pak1
Dgcr6	4.98801e-40	1.49707	0.053	0.018	7.80473e-36	ILC2	Dgcr6
Psma7	6.17421e-40	0.316279	0.53	0.415	9.66078e-36	ILC2	Psma7
C2	6.35509e-40	0.978045	0.111	0.056	9.94381e-36	ILC2	C2
Tmem238	8.18865e-40	1.86705	0.042	0.012	1.28128e-35	ILC2	Tmem238
Runx1t1	1.12917e-39	5.60918	0.014	0	1.76681e-35	ILC2	Runx1t1
Nob1	1.28096e-39	1.18376	0.082	0.036	2.00432e-35	ILC2	Nob1
Cct3	2.76267e-39	0.519721	0.295	0.206	4.32275e-35	ILC2	Cct3
C9orf72	3.32522e-39	0.808162	0.165	0.098	5.20297e-35	ILC2	C9orf72
Hint1	3.46455e-39	0.357642	0.503	0.397	5.42098e-35	ILC2	Hint1
Aldh2	3.58514e-39	1.00608	0.092	0.043	5.60967e-35	ILC2	Aldh2
Mdn1	3.63583e-39	0.968108	0.105	0.052	5.68899e-35	ILC2	Mdn1
Pmepa1	3.64316e-39	1.36576	0.055	0.019	5.70045e-35	ILC2	Pmepa1
Anapc5	4.15292e-39	0.668358	0.193	0.12	6.49808e-35	ILC2	Anapc5
Dip2b	4.25294e-39	0.784029	0.145	0.082	6.65458e-35	ILC2	Dip2b
Atp1b2	5.22529e-39	4.34313	0.016	0.001	8.17602e-35	ILC2	Atp1b2
Rnf144b	5.36441e-39	1.88698	0.041	0.012	8.39369e-35	ILC2	Rnf144b
Pts	5.39004e-39	0.87363	0.134	0.074	8.43379e-35	ILC2	Pts
Slfn5	6.54424e-39	2.32673	0.026	0.004	1.02398e-34	ILC2	Slfn5
Fastkd3	7.80539e-39	2.27074	0.031	0.007	1.22131e-34	ILC2	Fastkd3
Gimap1	1.27273e-38	0.528604	0.267	0.183	1.99145e-34	ILC2	Gimap1
Sv2c	1.34561e-38	1.84551	0.039	0.011	2.10547e-34	ILC2	Sv2c
Adgrl2	1.50987e-38	3.59838	0.018	0.002	2.36249e-34	ILC2	Adgrl2
Car13	1.65168e-38	4.72283	0.014	0	2.58439e-34	ILC2	Car13
Oip5os1	2.09331e-38	0.599042	0.212	0.136	3.2754e-34	ILC2	Oip5os1
Cd6	2.50672e-38	1.33719	0.059	0.022	3.92226e-34	ILC2	Cd6
Ddb1	2.79542e-38	0.6952	0.19	0.118	4.374e-34	ILC2	Ddb1
Cxcl2	3.46421e-38	1.19499	0.215	0.142	5.42044e-34	ILC2	Cxcl2
Spns3	3.91666e-38	2.68523	0.024	0.004	6.1284e-34	ILC2	Spns3
Gm42031	4.39549e-38	0.432589	0.363	0.267	6.87763e-34	ILC2	Gm42031
Actr8	5.37358e-38	0.957223	0.096	0.047	8.40804e-34	ILC2	Actr8
Gm31718	5.55125e-38	1.98329	0.036	0.009	8.68604e-34	ILC2	Gm31718
Traf3ip2	5.85903e-38	0.655288	0.193	0.121	9.16763e-34	ILC2	Traf3ip2
Cox10	5.94546e-38	0.586781	0.209	0.133	9.30286e-34	ILC2	Cox10
Rbm28	6.0672e-38	0.689798	0.179	0.11	9.49335e-34	ILC2	Rbm28
Fkbp3	6.16542e-38	0.40422	0.386	0.287	9.64704e-34	ILC2	Fkbp3
Egln2	7.32641e-38	1.01596	0.101	0.05	1.14636e-33	ILC2	Egln2
Dhrs7	8.07651e-38	0.72953	0.153	0.089	1.26373e-33	ILC2	Dhrs7
Bex3	9.51351e-38	0.517008	0.244	0.162	1.48858e-33	ILC2	Bex3
Zfp36l1	9.60687e-38	0.190618	0.97	0.962	1.50319e-33	ILC2	Zfp36l1
Ppp1r9b	1.1274e-37	0.825698	0.134	0.075	1.76405e-33	ILC2	Ppp1r9b
Nlrc3	2.15325e-37	0.794608	0.132	0.073	3.36919e-33	ILC2	Nlrc3
Khdc1a	2.53657e-37	3.97961	0.016	0.001	3.96897e-33	ILC2	Khdc1a
Mrpl52	3.06943e-37	0.496061	0.277	0.192	4.80274e-33	ILC2	Mrpl52
Gm26834	3.55414e-37	4.53642	0.014	0.001	5.56117e-33	ILC2	Gm26834
Gbp9	4.54496e-37	0.871083	0.113	0.059	7.11149e-33	ILC2	Gbp9
Rab11a	4.64657e-37	0.565072	0.285	0.202	7.27048e-33	ILC2	Rab11a
Sfmbt1	4.7161e-37	1.18908	0.074	0.032	7.37928e-33	ILC2	Sfmbt1
Isy1	5.12768e-37	0.287422	0.554	0.444	8.02328e-33	ILC2	Isy1
P2rx4	5.83121e-37	0.978848	0.098	0.049	9.12409e-33	ILC2	P2rx4
Fbxo33	5.8907e-37	0.707105	0.177	0.109	9.21718e-33	ILC2	Fbxo33
Braf	7.2551e-37	0.819665	0.144	0.083	1.1352e-32	ILC2	Braf
Vamp1	7.2898e-37	1.53222	0.049	0.017	1.14064e-32	ILC2	Vamp1
Stau2	7.93763e-37	1.92692	0.035	0.009	1.242e-32	ILC2	Stau2
Fam107b	1.31449e-36	0.3455	0.566	0.466	2.05678e-32	ILC2	Fam107b
Cmpk1	1.37126e-36	0.529513	0.251	0.171	2.1456e-32	ILC2	Cmpk1
Rgs6	1.46694e-36	6.49222	0.012	0	2.29533e-32	ILC2	Rgs6
Rrp1b	1.53671e-36	1.28089	0.066	0.028	2.4045e-32	ILC2	Rrp1b
Grhl2	1.61626e-36	5.29902	0.013	0	2.52897e-32	ILC2	Grhl2
Gnpnat1	1.96485e-36	1.13739	0.081	0.037	3.07441e-32	ILC2	Gnpnat1
Aebp2	2.12262e-36	0.418585	0.363	0.27	3.32126e-32	ILC2	Aebp2
Klf7	2.54551e-36	0.608524	0.219	0.144	3.98296e-32	ILC2	Klf7
Sec24d	2.81177e-36	1.11718	0.083	0.039	4.39957e-32	ILC2	Sec24d
Rp9	3.04082e-36	0.439251	0.295	0.208	4.75798e-32	ILC2	Rp9
Tlr1	3.60804e-36	5.84836	0.012	0	5.6455e-32	ILC2	Tlr1
Slc3a2	5.13049e-36	0.269658	0.696	0.587	8.02768e-32	ILC2	Slc3a2
Specc1l	5.45495e-36	0.738807	0.16	0.097	8.53536e-32	ILC2	Specc1l
Zfp973	5.53789e-36	1.48656	0.051	0.018	8.66514e-32	ILC2	Zfp973
Cd53	6.44506e-36	0.239031	0.748	0.641	1.00846e-31	ILC2	Cd53
Gm13522	7.11699e-36	4.53642	0.014	0.001	1.11359e-31	ILC2	Gm13522
mt-Nd2	1.15371e-35	0.222028	0.883	0.823	1.80521e-31	ILC2	mt-Nd2
Mvk	1.37583e-35	0.905956	0.1	0.051	2.15275e-31	ILC2	Mvk
Pitpnm2	1.67296e-35	1.82819	0.036	0.01	2.61768e-31	ILC2	Pitpnm2
Rbm5	1.98441e-35	0.553737	0.233	0.157	3.105e-31	ILC2	Rbm5
Ndufv3	2.26454e-35	0.395381	0.355	0.261	3.54332e-31	ILC2	Ndufv3
Cerk	2.57632e-35	0.447858	0.297	0.211	4.03118e-31	ILC2	Cerk
Acsbg1	2.77951e-35	1.14891	0.072	0.032	4.3491e-31	ILC2	Acsbg1
2610507B11Rik	3.13076e-35	0.62254	0.209	0.137	4.89869e-31	ILC2	2610507B11Rik
Fars2	3.21445e-35	0.951668	0.095	0.047	5.02965e-31	ILC2	Fars2
Slc18a2	3.77562e-35	5.07076	0.013	0	5.90771e-31	ILC2	Slc18a2
Mecom	3.82316e-35	4.63844	0.013	0	5.98209e-31	ILC2	Mecom
Pla2g12a	4.75681e-35	2.02733	0.03	0.007	7.44298e-31	ILC2	Pla2g12a
Ifnar2	5.74788e-35	0.696517	0.174	0.108	8.99371e-31	ILC2	Ifnar2
Rpl10-ps3	5.80928e-35	0.512794	0.253	0.174	9.08978e-31	ILC2	Rpl10-ps3
Nop58	5.91832e-35	0.451191	0.326	0.239	9.2604e-31	ILC2	Nop58
Hmgn2	6.15135e-35	0.75032	0.153	0.091	9.62501e-31	ILC2	Hmgn2
Ahr	6.39766e-35	0.640683	0.161	0.097	1.00104e-30	ILC2	Ahr
Camk4	7.62193e-35	0.494166	0.275	0.194	1.1926e-30	ILC2	Camk4
Hmgcs1	8.75614e-35	0.889732	0.137	0.079	1.37007e-30	ILC2	Hmgcs1
Ncoa2	8.88966e-35	0.553137	0.211	0.138	1.39097e-30	ILC2	Ncoa2
Kalrn	9.41544e-35	1.09648	0.08	0.037	1.47323e-30	ILC2	Kalrn
Stat1	1.11155e-34	0.666139	0.17	0.106	1.73925e-30	ILC2	Stat1
Map4k1	1.12814e-34	0.950302	0.097	0.05	1.76519e-30	ILC2	Map4k1
Cxcl1	1.14325e-34	2.69181	0.045	0.015	1.78884e-30	ILC2	Cxcl1
Etfb	1.23495e-34	0.570979	0.215	0.143	1.93232e-30	ILC2	Etfb
Ndufa1	1.30681e-34	0.398982	0.323	0.234	2.04477e-30	ILC2	Ndufa1
Ass1	1.58514e-34	1.66656	0.039	0.012	2.48027e-30	ILC2	Ass1
Ino80d	1.62353e-34	0.663417	0.164	0.1	2.54033e-30	ILC2	Ino80d
Gtf2b	1.88806e-34	0.393093	0.389	0.297	2.95424e-30	ILC2	Gtf2b
Tapt1	2.06236e-34	0.751709	0.144	0.085	3.22697e-30	ILC2	Tapt1
Kdelr1	2.21595e-34	0.534206	0.224	0.149	3.4673e-30	ILC2	Kdelr1
Ifi209	3.02737e-34	0.893362	0.092	0.045	4.73693e-30	ILC2	Ifi209
Fam117a	3.64773e-34	1.31684	0.056	0.022	5.7076e-30	ILC2	Fam117a
Dip2c	4.08412e-34	2.67187	0.022	0.004	6.39042e-30	ILC2	Dip2c
Slc25a5	4.20635e-34	0.26416	0.658	0.554	6.58167e-30	ILC2	Slc25a5
Sema4a	4.41834e-34	3.83326	0.015	0.001	6.91338e-30	ILC2	Sema4a
Arf3	5.02703e-34	0.722037	0.149	0.089	7.86579e-30	ILC2	Arf3
Txnl1	5.45408e-34	0.495291	0.414	0.324	8.534e-30	ILC2	Txnl1
Plod2	5.93548e-34	0.766422	0.105	0.055	9.28724e-30	ILC2	Plod2
Cotl1	6.07309e-34	0.316688	0.595	0.496	9.50257e-30	ILC2	Cotl1
Fam151a	8.24735e-34	7.41315	0.011	0	1.29046e-29	ILC2	Fam151a
Nceh1	1.40816e-33	1.00946	0.081	0.039	2.20335e-29	ILC2	Nceh1
Wdr83os	1.46072e-33	0.470562	0.266	0.187	2.28559e-29	ILC2	Wdr83os
Il15ra	1.47603e-33	1.46032	0.046	0.016	2.30955e-29	ILC2	Il15ra
Slc31a2	1.52297e-33	1.68242	0.038	0.012	2.38299e-29	ILC2	Slc31a2
Tmx3	2.08376e-33	0.625455	0.16	0.097	3.26046e-29	ILC2	Tmx3
H2afz	3.16942e-33	0.574737	0.726	0.662	4.95919e-29	ILC2	H2afz
Abhd16a	3.46526e-33	0.607976	0.196	0.128	5.42209e-29	ILC2	Abhd16a
Cox4i1	3.61928e-33	0.217304	0.818	0.737	5.66308e-29	ILC2	Cox4i1
Eya2	3.85081e-33	0.707616	0.15	0.091	6.02536e-29	ILC2	Eya2
Cab39	4.93773e-33	0.43579	0.271	0.19	7.72607e-29	ILC2	Cab39
Eif3d	4.94012e-33	0.447382	0.286	0.204	7.7298e-29	ILC2	Eif3d
Yeats2	4.95312e-33	1.06808	0.079	0.037	7.75014e-29	ILC2	Yeats2
Gm9920	5.16996e-33	4.51133	0.013	0.001	8.08944e-29	ILC2	Gm9920
Stn1	5.55787e-33	0.774612	0.126	0.072	8.69639e-29	ILC2	Stn1
Mycbp2	6.11895e-33	0.332064	0.415	0.321	9.57432e-29	ILC2	Mycbp2
Hectd2	7.14636e-33	1.3608	0.054	0.021	1.11819e-28	ILC2	Hectd2
Gm20139	7.66496e-33	1.88819	0.033	0.009	1.19934e-28	ILC2	Gm20139
G430095P16Rik	9.27589e-33	4.36026	0.013	0.001	1.4514e-28	ILC2	G430095P16Rik
Gm15340	9.32609e-33	2.43818	0.022	0.004	1.45925e-28	ILC2	Gm15340
Etfdh	9.72245e-33	0.891339	0.11	0.06	1.52127e-28	ILC2	Etfdh
Dusp11	1.0747e-32	0.441291	0.306	0.223	1.68159e-28	ILC2	Dusp11
Bhlhb9	1.08026e-32	1.53758	0.043	0.014	1.69029e-28	ILC2	Bhlhb9
Smo	1.20183e-32	5.35086	0.011	0	1.88051e-28	ILC2	Smo
Slc35g1	1.35144e-32	3.24829	0.016	0.002	2.1146e-28	ILC2	Slc35g1
Nfkbia	1.57701e-32	0.286707	0.953	0.994	2.46754e-28	ILC2	Nfkbia
Dnajb6	1.8121e-32	0.303975	0.658	0.567	2.8354e-28	ILC2	Dnajb6
Casp8	1.97751e-32	0.5822	0.207	0.138	3.09422e-28	ILC2	Casp8
St3gal4	2.41742e-32	1.32209	0.051	0.019	3.78254e-28	ILC2	St3gal4
Pcmt1	2.56224e-32	0.526254	0.237	0.164	4.00914e-28	ILC2	Pcmt1
Trappc6b	2.8797e-32	0.466203	0.275	0.195	4.50586e-28	ILC2	Trappc6b
Tfpi	2.94639e-32	1.33623	0.052	0.02	4.61022e-28	ILC2	Tfpi
Txndc17	2.95223e-32	0.437966	0.323	0.239	4.61935e-28	ILC2	Txndc17
H2-DMa	3.07081e-32	1.18205	0.059	0.025	4.8049e-28	ILC2	H2-DMa
Tnfaip8	3.1777e-32	0.259117	0.611	0.51	4.97214e-28	ILC2	Tnfaip8
Tspan31	3.69788e-32	0.786219	0.116	0.065	5.78607e-28	ILC2	Tspan31
Rassf5	3.8081e-32	0.588801	0.194	0.127	5.95854e-28	ILC2	Rassf5
Plk2	4.28898e-32	0.997855	0.082	0.04	6.71097e-28	ILC2	Plk2
Ndufs4	4.34216e-32	0.4314	0.287	0.205	6.79417e-28	ILC2	Ndufs4
Gm13212	5.81239e-32	0.969409	0.089	0.045	9.09465e-28	ILC2	Gm13212
Prelid1	6.01424e-32	0.347251	0.369	0.278	9.41048e-28	ILC2	Prelid1
Galnt12	9.20755e-32	0.683908	0.155	0.096	1.4407e-27	ILC2	Galnt12
Raver2	1.02597e-31	2.29582	0.024	0.005	1.60534e-27	ILC2	Raver2
Muc1	1.06224e-31	0.871083	0.09	0.046	1.66208e-27	ILC2	Muc1
Adrb2	1.16796e-31	0.996565	0.103	0.056	1.8275e-27	ILC2	Adrb2
Bola3	1.29067e-31	0.58828	0.168	0.106	2.01951e-27	ILC2	Bola3
Ldlr	1.57839e-31	1.23599	0.057	0.023	2.46971e-27	ILC2	Ldlr
Cmtm6	1.82823e-31	0.492913	0.251	0.177	2.86063e-27	ILC2	Cmtm6
Hmgb2	2.18922e-31	0.255397	0.676	0.579	3.42547e-27	ILC2	Hmgb2
Erc1	2.29139e-31	1.92571	0.03	0.008	3.58534e-27	ILC2	Erc1
Bcap29	2.72212e-31	0.777731	0.129	0.076	4.2593e-27	ILC2	Bcap29
Tmem234	2.87263e-31	0.331241	0.411	0.318	4.4948e-27	ILC2	Tmem234
Gm27162	3.02024e-31	0.866759	0.116	0.066	4.72577e-27	ILC2	Gm27162
Sh3glb1	3.20631e-31	0.330777	0.414	0.321	5.01691e-27	ILC2	Sh3glb1
Gnl3	3.24468e-31	0.513774	0.239	0.166	5.07696e-27	ILC2	Gnl3
Camk2d	3.53816e-31	0.674497	0.137	0.081	5.53615e-27	ILC2	Camk2d
Gprasp2	4.61693e-31	3.74145	0.013	0.001	7.22411e-27	ILC2	Gprasp2
Slc2a1	5.29982e-31	1.0035	0.086	0.043	8.29262e-27	ILC2	Slc2a1
Dap3	5.83647e-31	0.714631	0.14	0.085	9.13233e-27	ILC2	Dap3
Tomm70a	6.14921e-31	0.593763	0.178	0.115	9.62167e-27	ILC2	Tomm70a
Edf1	6.16161e-31	0.312292	0.39	0.299	9.64107e-27	ILC2	Edf1
Il27ra	7.36862e-31	0.569112	0.181	0.117	1.15297e-26	ILC2	Il27ra
Was	7.39407e-31	0.466225	0.264	0.188	1.15695e-26	ILC2	Was
Wdr43	7.42642e-31	0.680423	0.152	0.094	1.16201e-26	ILC2	Wdr43
Rapsn	7.52189e-31	1.978	0.03	0.008	1.17695e-26	ILC2	Rapsn
Slc7a5	7.71975e-31	1.61888	0.041	0.014	1.20791e-26	ILC2	Slc7a5
Il10rb	7.72291e-31	0.865857	0.103	0.056	1.2084e-26	ILC2	Il10rb
Mxd1	8.33361e-31	0.22214	0.482	0.377	1.30396e-26	ILC2	Mxd1
Gm14164	8.362e-31	1.56939	0.039	0.013	1.3084e-26	ILC2	Gm14164
Lyn	8.60647e-31	0.306071	0.41	0.317	1.34665e-26	ILC2	Lyn
Itgb3bp	1.17429e-30	1.05884	0.065	0.029	1.83742e-26	ILC2	Itgb3bp
Rpn2	1.34403e-30	0.37673	0.334	0.249	2.10301e-26	ILC2	Rpn2
Sema3e	1.52913e-30	5.30779	0.011	0	2.39263e-26	ILC2	Sema3e
Zeb2	1.63631e-30	1.66911	0.037	0.012	2.56033e-26	ILC2	Zeb2
Tcp1	1.73589e-30	0.400444	0.318	0.236	2.71615e-26	ILC2	Tcp1
Rhof	2.03712e-30	0.892079	0.128	0.076	3.18748e-26	ILC2	Rhof
Eif4ebp2	2.07478e-30	0.43305	0.29	0.212	3.24641e-26	ILC2	Eif4ebp2
Simc1	2.60765e-30	1.17594	0.057	0.024	4.08019e-26	ILC2	Simc1
Dcun1d1	2.87491e-30	0.749831	0.135	0.081	4.49837e-26	ILC2	Dcun1d1
Vars	3.49612e-30	0.295851	0.443	0.349	5.47037e-26	ILC2	Vars
Anxa11	3.64836e-30	0.585612	0.201	0.135	5.70859e-26	ILC2	Anxa11
Asb5	4.11253e-30	2.46985	0.02	0.003	6.43488e-26	ILC2	Asb5
Orc4	4.16267e-30	0.825931	0.11	0.062	6.51333e-26	ILC2	Orc4
Nono	4.60178e-30	0.342049	0.355	0.268	7.2004e-26	ILC2	Nono
Txn2	4.79752e-30	0.561682	0.201	0.135	7.50668e-26	ILC2	Txn2
Zhx1	5.09125e-30	0.647086	0.141	0.086	7.96628e-26	ILC2	Zhx1
Hnrnpa1	5.46514e-30	0.234592	0.667	0.565	8.55131e-26	ILC2	Hnrnpa1
Ifi35	6.46646e-30	0.742225	0.122	0.071	1.01181e-25	ILC2	Ifi35
Csrp1	7.25341e-30	0.595976	0.174	0.112	1.13494e-25	ILC2	Csrp1
Kcnab2	7.26989e-30	0.840398	0.1	0.054	1.13752e-25	ILC2	Kcnab2
Anp32e	7.51167e-30	0.465748	0.259	0.186	1.17535e-25	ILC2	Anp32e
Npepl1	8.90901e-30	0.700922	0.13	0.077	1.39399e-25	ILC2	Npepl1
Ralgapa1	9.40075e-30	0.770651	0.123	0.072	1.47093e-25	ILC2	Ralgapa1
Aprt	9.95391e-30	0.398607	0.278	0.201	1.55749e-25	ILC2	Aprt
Pomgnt1	1.04227e-29	1.59945	0.051	0.021	1.63084e-25	ILC2	Pomgnt1
Fnip2	1.13672e-29	1.89662	0.026	0.006	1.77862e-25	ILC2	Fnip2
Lamc1	1.20162e-29	0.673891	0.153	0.096	1.88018e-25	ILC2	Lamc1
Lpcat3	1.24987e-29	1.14416	0.063	0.028	1.95567e-25	ILC2	Lpcat3
Kif13b	1.32892e-29	0.97122	0.073	0.035	2.07936e-25	ILC2	Kif13b
Ddit4	1.71926e-29	1.35762	0.051	0.021	2.69013e-25	ILC2	Ddit4
Nmt2	1.83268e-29	0.941835	0.112	0.065	2.86759e-25	ILC2	Nmt2
Snrpd2	1.88894e-29	0.385484	0.334	0.253	2.95563e-25	ILC2	Snrpd2
Sidt2	1.91169e-29	0.508988	0.223	0.154	2.99122e-25	ILC2	Sidt2
Itga2	2.51207e-29	1.51372	0.037	0.012	3.93063e-25	ILC2	Itga2
Vopp1	2.821e-29	0.950736	0.083	0.042	4.41402e-25	ILC2	Vopp1
Med15	2.92788e-29	0.687716	0.135	0.082	4.58125e-25	ILC2	Med15
Rbpj	3.05743e-29	0.40776	0.33	0.25	4.78396e-25	ILC2	Rbpj
Spryd7	3.11326e-29	0.876921	0.095	0.051	4.87131e-25	ILC2	Spryd7
Idh2	3.17909e-29	1.31036	0.048	0.019	4.97432e-25	ILC2	Idh2
Plxna1	3.35979e-29	2.29582	0.022	0.005	5.25707e-25	ILC2	Plxna1
Gm26759	3.47729e-29	1.41721	0.042	0.015	5.44092e-25	ILC2	Gm26759
AC150683.1	3.80813e-29	4.58533	0.012	0.001	5.95858e-25	ILC2	AC150683.1
Map6	4.08861e-29	4.56457	0.011	0	6.39746e-25	ILC2	Map6
Oas3	4.59101e-29	1.96253	0.024	0.005	7.18356e-25	ILC2	Oas3
Phb2	4.8881e-29	0.417211	0.278	0.202	7.64841e-25	ILC2	Phb2
Fam71f2	5.11354e-29	1.54693	0.039	0.014	8.00116e-25	ILC2	Fam71f2
Cct8	5.52845e-29	0.360683	0.329	0.247	8.65036e-25	ILC2	Cct8
Kars	5.64245e-29	0.713346	0.122	0.072	8.82874e-25	ILC2	Kars
Mindy1	5.80091e-29	1.38941	0.045	0.017	9.07668e-25	ILC2	Mindy1
Hpn	6.14037e-29	1.51301	0.036	0.012	9.60783e-25	ILC2	Hpn
Nras	6.86433e-29	0.815348	0.106	0.06	1.07406e-24	ILC2	Nras
Laptm5	7.3032e-29	0.177843	0.796	0.679	1.14273e-24	ILC2	Laptm5
A930006K02Rik	8.1197e-29	1.51787	0.039	0.013	1.27049e-24	ILC2	A930006K02Rik
Zfp592	9.74337e-29	0.769253	0.119	0.07	1.52455e-24	ILC2	Zfp592
Cdk8	9.90467e-29	0.583257	0.194	0.131	1.54978e-24	ILC2	Cdk8
Rhoc	1.07427e-28	0.572086	0.206	0.141	1.68091e-24	ILC2	Rhoc
Arl6ip5	1.5158e-28	0.347374	0.39	0.304	2.37177e-24	ILC2	Arl6ip5
Acss1	1.54942e-28	1.94929	0.025	0.006	2.42437e-24	ILC2	Acss1
Nipal1	1.67994e-28	3.16152	0.014	0.001	2.62861e-24	ILC2	Nipal1
Arpp19	1.83007e-28	0.380164	0.305	0.226	2.86352e-24	ILC2	Arpp19
Atp5f1	2.12616e-28	0.289962	0.443	0.352	3.3268e-24	ILC2	Atp5f1
Usp33	2.19752e-28	1.24416	0.05	0.021	3.43847e-24	ILC2	Usp33
Ncor2	3.45716e-28	0.566558	0.183	0.121	5.40943e-24	ILC2	Ncor2
Mrpl23	3.56394e-28	0.398427	0.26	0.186	5.57649e-24	ILC2	Mrpl23
Zfp609	4.25663e-28	1.46763	0.04	0.015	6.66035e-24	ILC2	Zfp609
Ppa1	4.76954e-28	1.0271	0.073	0.036	7.46291e-24	ILC2	Ppa1
Slk	4.87786e-28	0.318449	0.42	0.333	7.63239e-24	ILC2	Slk
Chchd3	4.99942e-28	0.48596	0.222	0.155	7.82259e-24	ILC2	Chchd3
Tcf7l1	5.00727e-28	3.47285	0.013	0.001	7.83487e-24	ILC2	Tcf7l1
Gm12840	5.17187e-28	0.539154	0.128	0.077	8.09243e-24	ILC2	Gm12840
Synj2	5.83007e-28	1.07577	0.065	0.03	9.12231e-24	ILC2	Synj2
Ostc	6.82394e-28	0.380425	0.296	0.218	1.06774e-23	ILC2	Ostc
Cox5b	6.98774e-28	0.297314	0.456	0.365	1.09337e-23	ILC2	Cox5b
Csf2ra	7.43564e-28	1.30404	0.047	0.019	1.16345e-23	ILC2	Csf2ra
Pmm2	7.63593e-28	0.705477	0.122	0.073	1.19479e-23	ILC2	Pmm2
Tbc1d9b	8.00618e-28	0.493162	0.215	0.149	1.25273e-23	ILC2	Tbc1d9b
Arpc1a	8.0605e-28	0.501896	0.217	0.151	1.26123e-23	ILC2	Arpc1a
Hmgcr	9.00429e-28	0.711486	0.144	0.091	1.4089e-23	ILC2	Hmgcr
Eif2a	1.01358e-27	0.600671	0.156	0.1	1.58594e-23	ILC2	Eif2a
Gbp4	1.04112e-27	0.612655	0.147	0.093	1.62905e-23	ILC2	Gbp4
Clstn1	1.07062e-27	1.38844	0.044	0.017	1.67519e-23	ILC2	Clstn1
Mmp25	1.07503e-27	1.01269	0.071	0.035	1.6821e-23	ILC2	Mmp25
4921511C10Rik	1.11246e-27	3.64587	0.012	0.001	1.74067e-23	ILC2	4921511C10Rik
Irf9	1.17875e-27	0.882353	0.094	0.051	1.84439e-23	ILC2	Irf9
Trmt112	1.21889e-27	0.307947	0.403	0.317	1.9072e-23	ILC2	Trmt112
Srebf2	1.24148e-27	0.433545	0.251	0.18	1.94254e-23	ILC2	Srebf2
Arhgap27os3	1.24593e-27	2.30024	0.02	0.004	1.94951e-23	ILC2	Arhgap27os3
Myl6	1.25364e-27	0.20126	0.776	0.679	1.96158e-23	ILC2	Myl6
Psmg4	1.29804e-27	0.604994	0.144	0.09	2.03104e-23	ILC2	Psmg4
Nufip2	1.33123e-27	0.426956	0.287	0.213	2.08297e-23	ILC2	Nufip2
Myo6	1.35365e-27	1.03833	0.087	0.047	2.11805e-23	ILC2	Myo6
Mak16	1.45687e-27	0.686649	0.136	0.084	2.27956e-23	ILC2	Mak16
Kmt2d	1.48615e-27	0.627657	0.142	0.088	2.32538e-23	ILC2	Kmt2d
Cyld	1.77837e-27	0.453836	0.267	0.196	2.78261e-23	ILC2	Cyld
Cep63	1.78986e-27	0.621005	0.137	0.085	2.80059e-23	ILC2	Cep63
Med12l	1.80555e-27	2.20769	0.021	0.005	2.82515e-23	ILC2	Med12l
Serpine1	2.16776e-27	5.81799	0.01	0	3.3919e-23	ILC2	Serpine1
Crip1	2.26588e-27	0.474714	0.314	0.237	3.54543e-23	ILC2	Crip1
Llph	2.3455e-27	0.415672	0.26	0.188	3.67e-23	ILC2	Llph
Snhg8	2.35238e-27	0.299864	0.391	0.306	3.68077e-23	ILC2	Snhg8
Macf1	2.39203e-27	0.226595	0.56	0.462	3.74281e-23	ILC2	Macf1
Ralgps2	2.85547e-27	0.708551	0.126	0.076	4.46796e-23	ILC2	Ralgps2
Blmh	2.90358e-27	0.762252	0.111	0.065	4.54323e-23	ILC2	Blmh
Mtap	3.13579e-27	0.739332	0.11	0.064	4.90657e-23	ILC2	Mtap
Bcl2	4.43264e-27	0.241177	0.446	0.352	6.93575e-23	ILC2	Bcl2
Actn3	4.52278e-27	4.91875	0.01	0	7.07679e-23	ILC2	Actn3
Atic	4.63208e-27	0.807455	0.093	0.051	7.24781e-23	ILC2	Atic
Rab20	5.09075e-27	0.905849	0.085	0.045	7.9655e-23	ILC2	Rab20
Mybbp1a	5.3015e-27	0.686573	0.134	0.083	8.29526e-23	ILC2	Mybbp1a
Ndufa13	5.38888e-27	0.305161	0.394	0.308	8.43198e-23	ILC2	Ndufa13
Zfp827	6.05745e-27	1.42312	0.039	0.014	9.47809e-23	ILC2	Zfp827
Syne4	6.089e-27	3.23169	0.013	0.001	9.52746e-23	ILC2	Syne4
Psd3	7.09076e-27	1.22276	0.055	0.024	1.10949e-22	ILC2	Psd3
Rsrc2	7.10611e-27	0.35413	0.396	0.315	1.11189e-22	ILC2	Rsrc2
Atp5g1	8.28634e-27	0.405775	0.284	0.211	1.29656e-22	ILC2	Atp5g1
Sppl3	8.66619e-27	0.625668	0.16	0.105	1.356e-22	ILC2	Sppl3
Snrpd1	8.73838e-27	0.473638	0.221	0.155	1.36729e-22	ILC2	Snrpd1
Ern1	1.08072e-26	0.312787	0.424	0.338	1.691e-22	ILC2	Ern1
Ifitm3	1.13584e-26	1.76446	0.025	0.006	1.77724e-22	ILC2	Ifitm3
Ccnl2	1.15237e-26	0.371354	0.3	0.223	1.80312e-22	ILC2	Ccnl2
Pla2g7	1.17e-26	2.49947	0.016	0.002	1.83069e-22	ILC2	Pla2g7
Tgfb1	1.27381e-26	0.332029	0.359	0.277	1.99313e-22	ILC2	Tgfb1
Plgrkt	1.29492e-26	0.366494	0.291	0.216	2.02616e-22	ILC2	Plgrkt
Tgif2	1.34225e-26	0.719022	0.115	0.068	2.10022e-22	ILC2	Tgif2
Ubb	1.3659e-26	0.10132	1	1	2.13723e-22	ILC2	Ubb
Ldhd	1.86366e-26	1.56788	0.037	0.013	2.91607e-22	ILC2	Ldhd
Zfp467	2.14212e-26	1.35922	0.04	0.015	3.35178e-22	ILC2	Zfp467
Map1b	2.17626e-26	2.83326	0.015	0.002	3.40519e-22	ILC2	Map1b
Rnpepl1	2.59066e-26	0.810274	0.09	0.049	4.05361e-22	ILC2	Rnpepl1
Gm49339	3.37002e-26	2.1259	0.021	0.004	5.27307e-22	ILC2	Gm49339
Hist1h1c	3.43661e-26	0.471003	0.239	0.172	5.37726e-22	ILC2	Hist1h1c
Ndufa5	4.01978e-26	0.625176	0.158	0.104	6.28975e-22	ILC2	Ndufa5
Ankrd44	4.36241e-26	0.429884	0.215	0.15	6.82587e-22	ILC2	Ankrd44
Tmem135	4.48761e-26	0.795228	0.114	0.068	7.02177e-22	ILC2	Tmem135
Txnip	4.57311e-26	0.677065	0.17	0.114	7.15554e-22	ILC2	Txnip
Cuedc2	4.69996e-26	0.806309	0.1	0.057	7.35403e-22	ILC2	Cuedc2
Ankrd13c	5.69912e-26	0.684668	0.133	0.083	8.91741e-22	ILC2	Ankrd13c
Zbtb21	5.9039e-26	0.466536	0.23	0.165	9.23784e-22	ILC2	Zbtb21
Padi2	5.9986e-26	0.496447	0.171	0.113	9.38601e-22	ILC2	Padi2
Ppid	6.42324e-26	0.841058	0.095	0.053	1.00504e-21	ILC2	Ppid
Cnpy2	6.8137e-26	0.675162	0.117	0.07	1.06614e-21	ILC2	Cnpy2
Lrch3	6.86548e-26	0.611182	0.146	0.094	1.07424e-21	ILC2	Lrch3
Fabp5	6.98703e-26	1.43529	0.04	0.015	1.09326e-21	ILC2	Fabp5
Gimap6	8.70646e-26	0.203066	0.608	0.513	1.3623e-21	ILC2	Gimap6
Fkbp11	8.75969e-26	3.31925	0.012	0.001	1.37063e-21	ILC2	Fkbp11
Smg9	9.37129e-26	0.904816	0.074	0.038	1.46633e-21	ILC2	Smg9
Thsd4	9.83652e-26	3.95146	0.01	0	1.53912e-21	ILC2	Thsd4
Tlk1	1.37001e-25	0.419366	0.256	0.187	2.14366e-21	ILC2	Tlk1
Sytl1	1.46368e-25	1.68398	0.029	0.009	2.29022e-21	ILC2	Sytl1
Pip5k1b	1.61856e-25	0.518699	0.176	0.119	2.53256e-21	ILC2	Pip5k1b
Fam174b	1.78936e-25	2.98222	0.013	0.001	2.79981e-21	ILC2	Fam174b
Eif2s3x	1.81863e-25	0.461101	0.233	0.168	2.84561e-21	ILC2	Eif2s3x
Cited2	1.82019e-25	0.356166	0.396	0.315	2.84805e-21	ILC2	Cited2
Epm2aip1	1.82187e-25	1.03724	0.083	0.045	2.85069e-21	ILC2	Epm2aip1
BC048403	2.11559e-25	1.23248	0.046	0.019	3.31027e-21	ILC2	BC048403
Rcan3	2.22511e-25	1.87245	0.024	0.006	3.48163e-21	ILC2	Rcan3
Sec61g	2.23177e-25	0.234693	0.522	0.429	3.49204e-21	ILC2	Sec61g
Trim30d	2.23349e-25	1.06019	0.057	0.027	3.49474e-21	ILC2	Trim30d
Uchl3	2.38145e-25	0.672006	0.118	0.071	3.72625e-21	ILC2	Uchl3
Nfx1	2.45744e-25	0.507061	0.201	0.141	3.84516e-21	ILC2	Nfx1
Usp10	2.7065e-25	0.82894	0.082	0.044	4.23487e-21	ILC2	Usp10
Tmem165	2.86423e-25	0.939612	0.076	0.04	4.48166e-21	ILC2	Tmem165
Nktr	2.93162e-25	0.308225	0.343	0.264	4.5871e-21	ILC2	Nktr
Gm49735	3.14735e-25	2.13161	0.02	0.004	4.92466e-21	ILC2	Gm49735
Gm43305	3.31778e-25	0.541509	0.222	0.158	5.19133e-21	ILC2	Gm43305
Fam210a	4.12306e-25	1.16122	0.053	0.024	6.45135e-21	ILC2	Fam210a
Trp53i11	4.27276e-25	0.833213	0.086	0.047	6.68559e-21	ILC2	Trp53i11
Cox6b1	6.19823e-25	0.247187	0.508	0.417	9.69838e-21	ILC2	Cox6b1
Mxd4	6.53143e-25	0.417816	0.255	0.187	1.02197e-20	ILC2	Mxd4
Park7	7.20298e-25	0.327983	0.343	0.266	1.12705e-20	ILC2	Park7
Hadh	7.42529e-25	0.608074	0.148	0.097	1.16183e-20	ILC2	Hadh
Rnf130	7.84915e-25	0.255064	0.416	0.329	1.22816e-20	ILC2	Rnf130
Prc1	7.93455e-25	0.888745	0.087	0.049	1.24152e-20	ILC2	Prc1
Supt3	1.23863e-24	1.0256	0.057	0.027	1.93808e-20	ILC2	Supt3
Sdhb	1.28804e-24	0.405805	0.238	0.173	2.0154e-20	ILC2	Sdhb
Dstyk	1.35671e-24	1.28068	0.041	0.016	2.12285e-20	ILC2	Dstyk
Rsbn1l	1.4213e-24	0.333648	0.343	0.267	2.2239e-20	ILC2	Rsbn1l
Fads1	1.68341e-24	2.30522	0.018	0.003	2.63403e-20	ILC2	Fads1
Arhgap4	1.96182e-24	0.490172	0.181	0.124	3.06966e-20	ILC2	Arhgap4
Ecpas	2.02413e-24	0.560905	0.161	0.107	3.16716e-20	ILC2	Ecpas
Rgs18	2.07912e-24	1.25222	0.041	0.016	3.2532e-20	ILC2	Rgs18
Hipk2	2.54455e-24	0.964313	0.062	0.03	3.98146e-20	ILC2	Hipk2
Mrps16	2.83804e-24	0.613343	0.139	0.089	4.44069e-20	ILC2	Mrps16
Plcg1	2.99659e-24	1.31403	0.039	0.015	4.68877e-20	ILC2	Plcg1
Nap1l1	3.06579e-24	0.237399	0.481	0.393	4.79705e-20	ILC2	Nap1l1
Dtx3l	4.06122e-24	0.970699	0.062	0.03	6.35459e-20	ILC2	Dtx3l
Gvin1	4.22115e-24	1.00298	0.063	0.031	6.60484e-20	ILC2	Gvin1
Svil	4.41954e-24	0.594886	0.132	0.084	6.91525e-20	ILC2	Svil
Lrrfip2	4.64968e-24	0.566423	0.156	0.103	7.27535e-20	ILC2	Lrrfip2
Cd79b	5.10292e-24	0.847606	0.076	0.04	7.98454e-20	ILC2	Cd79b
Bpnt1	5.58389e-24	0.320393	0.328	0.253	8.73711e-20	ILC2	Bpnt1
Gbp8	5.70173e-24	0.636689	0.123	0.076	8.9215e-20	ILC2	Gbp8
Tbc1d10a	6.39008e-24	0.874835	0.08	0.044	9.99856e-20	ILC2	Tbc1d10a
Trim12a	6.67692e-24	0.524729	0.161	0.107	1.04474e-19	ILC2	Trim12a
Grik5	6.94185e-24	1.68132	0.027	0.009	1.08619e-19	ILC2	Grik5
Zcwpw1	7.42267e-24	1.25762	0.041	0.017	1.16143e-19	ILC2	Zcwpw1
4932438A13Rik	7.95435e-24	0.347178	0.312	0.24	1.24462e-19	ILC2	4932438A13Rik
Btk	7.9833e-24	3.22493	0.012	0.001	1.24915e-19	ILC2	Btk
Mid1	8.48148e-24	0.773163	0.086	0.048	1.3271e-19	ILC2	Mid1
Luc7l	8.90795e-24	0.44985	0.21	0.149	1.39383e-19	ILC2	Luc7l
Pim2	8.94506e-24	0.317594	0.274	0.204	1.39963e-19	ILC2	Pim2
E2f4	9.30647e-24	0.544302	0.167	0.113	1.45618e-19	ILC2	E2f4
Tmem160	1.02453e-23	0.360635	0.239	0.173	1.60308e-19	ILC2	Tmem160
Gramd1c	1.11593e-23	1.34626	0.035	0.013	1.74609e-19	ILC2	Gramd1c
Hint3	1.15274e-23	0.722569	0.104	0.062	1.80369e-19	ILC2	Hint3
C1qbp	1.18712e-23	0.567682	0.158	0.105	1.85748e-19	ILC2	C1qbp
Taok3	1.29669e-23	0.533508	0.175	0.12	2.02892e-19	ILC2	Taok3
Erp29	1.45545e-23	0.476872	0.193	0.135	2.27735e-19	ILC2	Erp29
Pa2g4	1.63628e-23	0.439948	0.25	0.186	2.56028e-19	ILC2	Pa2g4
Gm44686	1.90654e-23	2.06785	0.02	0.005	2.98316e-19	ILC2	Gm44686
1110038B12Rik	2.25574e-23	0.589984	0.144	0.094	3.52955e-19	ILC2	1110038B12Rik
Sipa1l1	2.37725e-23	0.448715	0.194	0.136	3.71968e-19	ILC2	Sipa1l1
Ikbke	2.62438e-23	0.862038	0.071	0.037	4.10637e-19	ILC2	Ikbke
Tfip11	2.65531e-23	0.458398	0.219	0.158	4.15476e-19	ILC2	Tfip11
6530402F18Rik	2.75194e-23	1.42177	0.034	0.013	4.30596e-19	ILC2	6530402F18Rik
Zcchc7	3.49428e-23	0.513871	0.178	0.123	5.4675e-19	ILC2	Zcchc7
Maz	4.12572e-23	0.583558	0.135	0.087	6.45552e-19	ILC2	Maz
Camk2b	4.22334e-23	0.73774	0.106	0.064	6.60825e-19	ILC2	Camk2b
Mfsd14a	4.35042e-23	0.632254	0.129	0.082	6.80711e-19	ILC2	Mfsd14a
Gm21887	4.35197e-23	0.850853	0.075	0.04	6.80953e-19	ILC2	Gm21887
Mrpl54	4.53013e-23	0.495798	0.186	0.13	7.08829e-19	ILC2	Mrpl54
Gaa	4.93064e-23	0.942938	0.066	0.034	7.71497e-19	ILC2	Gaa
Psma5	4.95358e-23	0.409331	0.231	0.168	7.75087e-19	ILC2	Psma5
Carf	5.44199e-23	1.10024	0.053	0.025	8.51508e-19	ILC2	Carf
Fam162a	6.53911e-23	0.617335	0.129	0.082	1.02317e-18	ILC2	Fam162a
Gapvd1	6.80046e-23	0.523276	0.169	0.116	1.06407e-18	ILC2	Gapvd1
Myo1g	7.65939e-23	0.508752	0.174	0.12	1.19846e-18	ILC2	Myo1g
Acsl3	8.00169e-23	1.7411	0.024	0.007	1.25202e-18	ILC2	Acsl3
Atxn1	8.19814e-23	0.45261	0.196	0.138	1.28276e-18	ILC2	Atxn1
Gng10	1.14735e-22	1.11421	0.045	0.019	1.79525e-18	ILC2	Gng10
Wdr60	1.28043e-22	2.46985	0.014	0.002	2.00349e-18	ILC2	Wdr60
Reps1	1.47867e-22	0.580058	0.143	0.094	2.31368e-18	ILC2	Reps1
Psmc3	1.49442e-22	0.386429	0.265	0.2	2.33832e-18	ILC2	Psmc3
Sh3bgrl3	1.51075e-22	0.165895	0.818	0.737	2.36387e-18	ILC2	Sh3bgrl3
Cntnap2	1.52609e-22	3.0999	0.012	0.001	2.38787e-18	ILC2	Cntnap2
Dnmbp	1.61747e-22	0.906608	0.066	0.035	2.53086e-18	ILC2	Dnmbp
Tmem267	1.7099e-22	1.73515	0.025	0.008	2.67548e-18	ILC2	Tmem267
Ifitm10	1.81654e-22	2.15649	0.017	0.004	2.84234e-18	ILC2	Ifitm10
Kntc1	1.85751e-22	3.13787	0.011	0.001	2.90645e-18	ILC2	Kntc1
Gmfb	1.95989e-22	0.580707	0.133	0.086	3.06665e-18	ILC2	Gmfb
Polg2	2.21799e-22	0.657446	0.112	0.07	3.47049e-18	ILC2	Polg2
Serpinb6a	2.28116e-22	0.844775	0.078	0.043	3.56933e-18	ILC2	Serpinb6a
Atcayos	2.33823e-22	2.30779	0.016	0.003	3.65863e-18	ILC2	Atcayos
Ehmt2	2.43966e-22	0.393863	0.247	0.184	3.81733e-18	ILC2	Ehmt2
Ripk3	2.55312e-22	0.896269	0.071	0.038	3.99486e-18	ILC2	Ripk3
mt-Nd4l	2.70707e-22	0.263165	0.422	0.341	4.23576e-18	ILC2	mt-Nd4l
Prep	3.15333e-22	1.0136	0.06	0.03	4.93402e-18	ILC2	Prep
Fas	3.5577e-22	1.4023	0.032	0.012	5.56673e-18	ILC2	Fas
Mif4gd	3.6211e-22	0.353676	0.301	0.233	5.66593e-18	ILC2	Mif4gd
Mpp6	4.03822e-22	0.907963	0.063	0.032	6.3186e-18	ILC2	Mpp6
Dnajc2	4.18983e-22	0.444943	0.167	0.114	6.55583e-18	ILC2	Dnajc2
Gimap8	5.15961e-22	0.307991	0.301	0.231	8.07324e-18	ILC2	Gimap8
Selenoh	5.34107e-22	0.494461	0.148	0.099	8.35717e-18	ILC2	Selenoh
Ubl5	6.33692e-22	0.196894	0.539	0.446	9.91537e-18	ILC2	Ubl5
Psmb9	6.99246e-22	0.438739	0.205	0.148	1.09411e-17	ILC2	Psmb9
Glrx3	7.04733e-22	0.457078	0.19	0.134	1.1027e-17	ILC2	Glrx3
Man2b1	7.30944e-22	0.61698	0.116	0.073	1.14371e-17	ILC2	Man2b1
Pkn2	7.34103e-22	0.416169	0.243	0.181	1.14865e-17	ILC2	Pkn2
Babam2	7.36459e-22	0.518174	0.159	0.108	1.15234e-17	ILC2	Babam2
Foxn3	8.25534e-22	0.375928	0.228	0.167	1.29171e-17	ILC2	Foxn3
Cyb5b	9.71305e-22	0.736205	0.091	0.054	1.5198e-17	ILC2	Cyb5b
Taf1c	1.02111e-21	1.06521	0.049	0.023	1.59774e-17	ILC2	Taf1c
Nsmf	1.14259e-21	1.41952	0.032	0.012	1.78781e-17	ILC2	Nsmf
Atp6v0d1	1.27275e-21	0.445594	0.208	0.151	1.99148e-17	ILC2	Atp6v0d1
R3hdm1	1.48907e-21	0.450121	0.182	0.128	2.32995e-17	ILC2	R3hdm1
Nt5c3b	1.58337e-21	0.733851	0.094	0.056	2.4775e-17	ILC2	Nt5c3b
Cst7	1.65783e-21	0.776715	0.075	0.042	2.59401e-17	ILC2	Cst7
Morrbid	1.68756e-21	1.38343	0.037	0.015	2.64053e-17	ILC2	Morrbid
Atxn10	1.71089e-21	0.418249	0.201	0.144	2.67703e-17	ILC2	Atxn10
Grap	1.80467e-21	0.659981	0.113	0.071	2.82377e-17	ILC2	Grap
Tex2	1.80913e-21	0.236798	0.4	0.32	2.83074e-17	ILC2	Tex2
Ubap2l	1.89325e-21	0.313154	0.307	0.239	2.96236e-17	ILC2	Ubap2l
Maml2	1.93106e-21	0.700859	0.091	0.054	3.02152e-17	ILC2	Maml2
Cisd1	2.0261e-21	0.778334	0.085	0.049	3.17024e-17	ILC2	Cisd1
Mpp7	2.28637e-21	0.433998	0.208	0.151	3.57748e-17	ILC2	Mpp7
Camk1d	2.34605e-21	0.318216	0.331	0.26	3.67087e-17	ILC2	Camk1d
Esyt1	2.64006e-21	0.491459	0.159	0.109	4.13091e-17	ILC2	Esyt1
Gm8797	2.89989e-21	0.483366	0.177	0.125	4.53745e-17	ILC2	Gm8797
Psma1	2.94272e-21	0.348378	0.261	0.197	4.60447e-17	ILC2	Psma1
Slc39a4	3.10008e-21	0.644026	0.107	0.066	4.8507e-17	ILC2	Slc39a4
Cenpv	3.15267e-21	1.74493	0.024	0.007	4.93298e-17	ILC2	Cenpv
A630001G21Rik	3.27883e-21	0.845714	0.068	0.037	5.13038e-17	ILC2	A630001G21Rik
Nop9	3.88103e-21	0.897865	0.063	0.033	6.07265e-17	ILC2	Nop9
Fam20b	3.93353e-21	0.879486	0.067	0.036	6.15479e-17	ILC2	Fam20b
Tmem147	4.33825e-21	0.478157	0.16	0.11	6.78806e-17	ILC2	Tmem147
Prcp	4.42642e-21	0.550485	0.15	0.102	6.92602e-17	ILC2	Prcp
Txnl4a	4.43857e-21	0.689007	0.09	0.053	6.94503e-17	ILC2	Txnl4a
Smdt1	6.21972e-21	0.277608	0.336	0.265	9.73199e-17	ILC2	Smdt1
Ccdc171	7.5882e-21	1.10008	0.047	0.022	1.18733e-16	ILC2	Ccdc171
Sh3d19	7.81444e-21	1.74634	0.019	0.005	1.22273e-16	ILC2	Sh3d19
Mrps7	8.25662e-21	0.587098	0.119	0.076	1.29191e-16	ILC2	Mrps7
Fam133b	9.32362e-21	0.688606	0.097	0.059	1.45887e-16	ILC2	Fam133b
Gm13012	1.10022e-20	1.37888	0.031	0.012	1.72151e-16	ILC2	Gm13012
Gpatch4	1.12443e-20	1.23224	0.036	0.014	1.7594e-16	ILC2	Gpatch4
CAAA01118383.1	1.19468e-20	0.506159	0.154	0.106	1.86932e-16	ILC2	CAAA01118383.1
Zbtb1	1.22362e-20	0.363525	0.24	0.179	1.9146e-16	ILC2	Zbtb1
Iars2	1.22367e-20	0.460093	0.187	0.134	1.91468e-16	ILC2	Iars2
Jag1	1.24629e-20	1.22403	0.039	0.017	1.95007e-16	ILC2	Jag1
Eif4g2	1.30273e-20	0.160972	0.808	0.727	2.03838e-16	ILC2	Eif4g2
Fez1	1.3119e-20	3.17029	0.01	0.001	2.05273e-16	ILC2	Fez1
Trmt61b	1.40364e-20	0.500849	0.155	0.106	2.19628e-16	ILC2	Trmt61b
Cct6a	1.41318e-20	0.304311	0.27	0.206	2.2112e-16	ILC2	Cct6a
Ccdc69	1.5014e-20	1.20833	0.041	0.018	2.34924e-16	ILC2	Ccdc69
Bora	1.51215e-20	1.38749	0.03	0.011	2.36607e-16	ILC2	Bora
Birc2	1.51438e-20	0.3542	0.247	0.186	2.36954e-16	ILC2	Birc2
Mndal	1.6679e-20	0.181493	0.484	0.4	2.60977e-16	ILC2	Mndal
Cacna1a	1.71358e-20	1.23277	0.039	0.017	2.68124e-16	ILC2	Cacna1a
Tap2	1.80424e-20	0.311968	0.287	0.221	2.82309e-16	ILC2	Tap2
Scd2	1.83234e-20	1.71935	0.024	0.008	2.86706e-16	ILC2	Scd2
Pld3	1.88179e-20	0.685133	0.095	0.057	2.94444e-16	ILC2	Pld3
Dipk2a	1.91125e-20	0.865358	0.072	0.04	2.99054e-16	ILC2	Dipk2a
Tdg	1.91626e-20	0.445615	0.201	0.146	2.99837e-16	ILC2	Tdg
Rec8	1.98881e-20	2.52644	0.013	0.002	3.11188e-16	ILC2	Rec8
Pus7	2.02661e-20	1.41172	0.029	0.011	3.17103e-16	ILC2	Pus7
Gm5547	2.13313e-20	1.88489	0.019	0.005	3.33771e-16	ILC2	Gm5547
Arl4a	2.29373e-20	0.388932	0.232	0.173	3.589e-16	ILC2	Arl4a
Fkbp4	2.35865e-20	0.49778	0.159	0.11	3.69058e-16	ILC2	Fkbp4
Akap8l	2.5163e-20	0.29774	0.301	0.233	3.93726e-16	ILC2	Akap8l
Gm41414	2.7951e-20	2.21946	0.015	0.003	4.37349e-16	ILC2	Gm41414
Eif1b	3.07466e-20	0.554047	0.156	0.108	4.81092e-16	ILC2	Eif1b
Aggf1	3.22695e-20	0.542087	0.128	0.084	5.04921e-16	ILC2	Aggf1
5730420D15Rik	3.68421e-20	1.8421	0.019	0.005	5.76468e-16	ILC2	5730420D15Rik
Kxd1	3.69483e-20	0.473809	0.163	0.114	5.7813e-16	ILC2	Kxd1
Ipo7	3.77242e-20	0.526131	0.152	0.105	5.90271e-16	ILC2	Ipo7
Gpcpd1	3.8642e-20	0.464018	0.195	0.142	6.04632e-16	ILC2	Gpcpd1
Mrps17	3.88059e-20	0.598554	0.115	0.074	6.07195e-16	ILC2	Mrps17
Pum1	4.00748e-20	0.385946	0.227	0.169	6.2705e-16	ILC2	Pum1
Atp6v0a2	4.51467e-20	0.722131	0.085	0.05	7.06411e-16	ILC2	Atp6v0a2
Lyrm4	5.53585e-20	1.15479	0.041	0.019	8.66195e-16	ILC2	Lyrm4
Grhl1	6.00695e-20	2.94147	0.01	0.001	9.39907e-16	ILC2	Grhl1
Trim13	6.01469e-20	1.49314	0.029	0.011	9.41118e-16	ILC2	Trim13
Slc9a9	6.80129e-20	0.583873	0.119	0.077	1.0642e-15	ILC2	Slc9a9
Hdx	6.96924e-20	3.05987	0.01	0.001	1.09048e-15	ILC2	Hdx
Trerf1	7.72311e-20	0.765353	0.073	0.041	1.20843e-15	ILC2	Trerf1
Ubl4a	7.84239e-20	0.797396	0.07	0.039	1.2271e-15	ILC2	Ubl4a
Acot11	8.20201e-20	1.39156	0.032	0.013	1.28337e-15	ILC2	Acot11
Trpm3	8.39803e-20	1.37093	0.031	0.012	1.31404e-15	ILC2	Trpm3
Tmem208	8.42192e-20	0.578419	0.115	0.074	1.31778e-15	ILC2	Tmem208
Tmem50a	1.10665e-19	0.172101	0.555	0.465	1.73157e-15	ILC2	Tmem50a
Rnf2	1.15407e-19	0.525152	0.171	0.122	1.80577e-15	ILC2	Rnf2
Mrps33	1.18298e-19	0.36528	0.213	0.156	1.85102e-15	ILC2	Mrps33
Rpia	1.18787e-19	0.650957	0.101	0.063	1.85865e-15	ILC2	Rpia
Hdac4	1.33989e-19	0.72562	0.085	0.051	2.09653e-15	ILC2	Hdac4
Tmbim4	1.52039e-19	0.290283	0.321	0.254	2.37895e-15	ILC2	Tmbim4
Dpy19l3	1.54815e-19	0.624456	0.101	0.063	2.4224e-15	ILC2	Dpy19l3
Pon3	1.61281e-19	1.16514	0.037	0.016	2.52356e-15	ILC2	Pon3
Gtpbp4	1.70401e-19	0.396116	0.22	0.163	2.66627e-15	ILC2	Gtpbp4
Spint2	1.89473e-19	0.402061	0.22	0.164	2.96468e-15	ILC2	Spint2
Foxn2	1.974e-19	0.875443	0.059	0.031	3.08872e-15	ILC2	Foxn2
Snrpd3	2.01941e-19	0.279202	0.329	0.262	3.15977e-15	ILC2	Snrpd3
Mns1	2.36296e-19	1.44515	0.035	0.014	3.69732e-15	ILC2	Mns1
Nop14	2.38438e-19	0.527451	0.131	0.088	3.73084e-15	ILC2	Nop14
Stk10	2.5525e-19	0.351187	0.233	0.175	3.9939e-15	ILC2	Stk10
Swi5	2.59728e-19	0.281423	0.289	0.223	4.06397e-15	ILC2	Swi5
Efnb2	2.70199e-19	2.72807	0.011	0.001	4.2278e-15	ILC2	Efnb2
Tbl1xr1	2.71641e-19	0.532838	0.132	0.089	4.25036e-15	ILC2	Tbl1xr1
Il6st	2.72177e-19	1.25617	0.033	0.013	4.25875e-15	ILC2	Il6st
Rps6ka5	2.81504e-19	1.18572	0.038	0.017	4.40469e-15	ILC2	Rps6ka5
Hcfc1r1	3.35752e-19	0.504344	0.154	0.107	5.25351e-15	ILC2	Hcfc1r1
Zdhhc21	3.37914e-19	0.950933	0.051	0.026	5.28734e-15	ILC2	Zdhhc21
Dynlrb1	3.39509e-19	0.271385	0.323	0.256	5.3123e-15	ILC2	Dynlrb1
Hectd4	3.4816e-19	0.660677	0.095	0.059	5.44766e-15	ILC2	Hectd4
1190007I07Rik	3.6165e-19	0.848363	0.061	0.032	5.65873e-15	ILC2	1190007I07Rik
Lrmda	4.03463e-19	1.30068	0.031	0.012	6.31299e-15	ILC2	Lrmda
Lhfpl3	4.15949e-19	2.64191	0.012	0.002	6.50836e-15	ILC2	Lhfpl3
Agrp	4.47061e-19	1.4588	0.026	0.009	6.99517e-15	ILC2	Agrp
Axin2	4.54391e-19	1.07009	0.043	0.02	7.10986e-15	ILC2	Axin2
Shfl	4.66061e-19	0.980176	0.047	0.022	7.29246e-15	ILC2	Shfl
Cr1l	4.74777e-19	0.354189	0.247	0.188	7.42884e-15	ILC2	Cr1l
Rmdn1	4.87102e-19	0.711318	0.067	0.037	7.62169e-15	ILC2	Rmdn1
Ech1	5.05864e-19	0.459001	0.182	0.131	7.91526e-15	ILC2	Ech1
Thra	5.15134e-19	0.61747	0.091	0.055	8.0603e-15	ILC2	Thra
Nenf	5.1688e-19	1.25621	0.033	0.013	8.08763e-15	ILC2	Nenf
Bmi1	5.36455e-19	0.592074	0.109	0.07	8.39392e-15	ILC2	Bmi1
B230118H07Rik	6.41254e-19	0.984936	0.05	0.025	1.00337e-14	ILC2	B230118H07Rik
Med14	7.34262e-19	0.444433	0.176	0.126	1.1489e-14	ILC2	Med14
Arpc5	7.40382e-19	0.204877	0.467	0.386	1.15848e-14	ILC2	Arpc5
Rev3l	7.64543e-19	0.453732	0.172	0.123	1.19628e-14	ILC2	Rev3l
G3bp2	7.64624e-19	0.290601	0.313	0.248	1.19641e-14	ILC2	G3bp2
Naxe	7.91548e-19	0.523574	0.13	0.088	1.23854e-14	ILC2	Naxe
Trmt1	8.02313e-19	0.631552	0.094	0.058	1.25538e-14	ILC2	Trmt1
Neo1	8.0561e-19	2.64673	0.01	0.001	1.26054e-14	ILC2	Neo1
Adamts6	8.48124e-19	1.52837	0.023	0.008	1.32706e-14	ILC2	Adamts6
Rabggtb	9.22031e-19	0.585931	0.101	0.063	1.4427e-14	ILC2	Rabggtb
1810026B05Rik	9.65263e-19	1.11374	0.042	0.019	1.51035e-14	ILC2	1810026B05Rik
1700016D06Rik	9.68249e-19	1.44783	0.027	0.01	1.51502e-14	ILC2	1700016D06Rik
Guk1	9.85893e-19	0.606566	0.104	0.066	1.54263e-14	ILC2	Guk1
Rabep1	9.92098e-19	0.485929	0.138	0.094	1.55234e-14	ILC2	Rabep1
Synpo2	1.00765e-18	2.68563	0.011	0.002	1.57668e-14	ILC2	Synpo2
Gna15	1.02795e-18	0.812072	0.068	0.038	1.60843e-14	ILC2	Gna15
Eml5	1.07867e-18	1.20941	0.038	0.017	1.6878e-14	ILC2	Eml5
Tbk1	1.5288e-18	0.500156	0.133	0.09	2.39211e-14	ILC2	Tbk1
Add3	1.61031e-18	0.637508	0.09	0.055	2.51965e-14	ILC2	Add3
Zfp512b	1.61575e-18	1.08883	0.041	0.019	2.52816e-14	ILC2	Zfp512b
Irak1	1.78442e-18	0.386061	0.182	0.131	2.79208e-14	ILC2	Irak1
Ube2a	1.83344e-18	0.362468	0.244	0.187	2.86878e-14	ILC2	Ube2a
Vipr2	2.00907e-18	0.384469	0.132	0.089	3.1436e-14	ILC2	Vipr2
Cpne3	2.20001e-18	0.458952	0.149	0.104	3.44236e-14	ILC2	Cpne3
Gm7030	2.22893e-18	0.81399	0.066	0.037	3.48761e-14	ILC2	Gm7030
Cox7b	2.27713e-18	0.2596	0.402	0.332	3.56302e-14	ILC2	Cox7b
Isca1	2.33125e-18	0.428174	0.188	0.138	3.64771e-14	ILC2	Isca1
Rad52	2.37121e-18	1.58277	0.023	0.008	3.71023e-14	ILC2	Rad52
Gtf2h2	2.41774e-18	1.0142	0.048	0.024	3.78304e-14	ILC2	Gtf2h2
H2-T24	2.47401e-18	2.24479	0.013	0.003	3.87108e-14	ILC2	H2-T24
Tnip1	2.50066e-18	0.265938	0.37	0.302	3.91279e-14	ILC2	Tnip1
Cds2	2.68242e-18	0.616038	0.106	0.068	4.19719e-14	ILC2	Cds2
Hmga1	2.75085e-18	1.09276	0.039	0.018	4.30426e-14	ILC2	Hmga1
Cfap54	2.99295e-18	1.20924	0.03	0.012	4.68306e-14	ILC2	Cfap54
Rpe	3.08117e-18	0.634768	0.092	0.057	4.82111e-14	ILC2	Rpe
Gm45717	3.1502e-18	2.56596	0.012	0.002	4.92912e-14	ILC2	Gm45717
Gsk3b	3.15983e-18	0.352	0.228	0.173	4.94418e-14	ILC2	Gsk3b
Ifit1	3.31721e-18	1.63466	0.017	0.005	5.19044e-14	ILC2	Ifit1
Slc50a1	3.34233e-18	0.395396	0.197	0.145	5.22975e-14	ILC2	Slc50a1
Dtymk	3.69011e-18	0.703385	0.082	0.05	5.77391e-14	ILC2	Dtymk
Pdha1	3.73906e-18	0.289292	0.262	0.203	5.85051e-14	ILC2	Pdha1
Srp19	4.05517e-18	0.458902	0.147	0.102	6.34513e-14	ILC2	Srp19
Prpf8	4.29296e-18	0.396295	0.196	0.145	6.7172e-14	ILC2	Prpf8
Gm43055	4.32952e-18	2.17699	0.014	0.003	6.77441e-14	ILC2	Gm43055
Lman1	4.3464e-18	0.502204	0.132	0.09	6.80082e-14	ILC2	Lman1
Ndufb9	4.41268e-18	0.351746	0.223	0.168	6.90453e-14	ILC2	Ndufb9
Plekhj1	4.74591e-18	0.448616	0.18	0.131	7.42592e-14	ILC2	Plekhj1
Snhg1	4.87603e-18	0.273693	0.322	0.258	7.62953e-14	ILC2	Snhg1
Rnps1	4.93169e-18	0.368815	0.198	0.146	7.71662e-14	ILC2	Rnps1
Spag9	5.09456e-18	0.328931	0.245	0.188	7.97146e-14	ILC2	Spag9
Tshz3	5.17343e-18	0.95654	0.051	0.026	8.09486e-14	ILC2	Tshz3
Cfl2	5.25164e-18	0.848363	0.054	0.029	8.21724e-14	ILC2	Cfl2
Cs	5.6141e-18	0.463258	0.156	0.111	8.78438e-14	ILC2	Cs
Gm30275	6.05729e-18	2.92236	0.01	0.001	9.47785e-14	ILC2	Gm30275
Ap2s1	6.06723e-18	0.413665	0.186	0.136	9.49339e-14	ILC2	Ap2s1
Vdac1	6.10972e-18	0.433111	0.191	0.141	9.55988e-14	ILC2	Vdac1
Caprin1	6.55992e-18	0.336624	0.263	0.205	1.02643e-13	ILC2	Caprin1
Ddias	6.57629e-18	1.27039	0.033	0.014	1.02899e-13	ILC2	Ddias
Mrpl21	7.04796e-18	0.438987	0.171	0.123	1.10279e-13	ILC2	Mrpl21
Sfn	7.21236e-18	1.02577	0.048	0.024	1.12852e-13	ILC2	Sfn
Emilin1	7.62646e-18	1.79233	0.017	0.005	1.19331e-13	ILC2	Emilin1
Gm42372	8.10795e-18	2.51133	0.012	0.002	1.26865e-13	ILC2	Gm42372
Slc15a2	8.33857e-18	0.446599	0.174	0.126	1.30474e-13	ILC2	Slc15a2
Srek1	9.00069e-18	0.530311	0.13	0.088	1.40834e-13	ILC2	Srek1
Trio	9.08535e-18	0.458217	0.162	0.116	1.42158e-13	ILC2	Trio
Snrpc	9.79208e-18	0.328797	0.27	0.211	1.53217e-13	ILC2	Snrpc
Pdcd11	1.00226e-17	0.595545	0.1	0.064	1.56823e-13	ILC2	Pdcd11
Mrpl12	1.01595e-17	0.638499	0.091	0.057	1.58965e-13	ILC2	Mrpl12
Ndufa2	1.02937e-17	0.231131	0.414	0.343	1.61065e-13	ILC2	Ndufa2
Irak4	1.04689e-17	0.693145	0.081	0.049	1.63807e-13	ILC2	Irak4
Ldb1	1.05025e-17	0.309838	0.286	0.226	1.64332e-13	ILC2	Ldb1
Emc7	1.06727e-17	0.305557	0.242	0.185	1.66997e-13	ILC2	Emc7
Fam114a2	1.13426e-17	0.461692	0.16	0.115	1.77477e-13	ILC2	Fam114a2
Pbx2	1.15895e-17	0.8541	0.063	0.035	1.8134e-13	ILC2	Pbx2
Sdhaf4	1.17406e-17	0.769161	0.069	0.04	1.83705e-13	ILC2	Sdhaf4
Usp11	1.17782e-17	1.22472	0.032	0.013	1.84294e-13	ILC2	Usp11
Gm37988	1.20695e-17	0.758928	0.067	0.038	1.88851e-13	ILC2	Gm37988
Ccdc12	1.23528e-17	0.315097	0.256	0.199	1.93284e-13	ILC2	Ccdc12
Nlrc5	1.24299e-17	0.690411	0.079	0.048	1.94491e-13	ILC2	Nlrc5
Pgls	1.46992e-17	0.333969	0.213	0.16	2.29998e-13	ILC2	Pgls
Akap9	1.61194e-17	0.373554	0.216	0.163	2.5222e-13	ILC2	Akap9
Atp8b4	1.64658e-17	1.54268	0.021	0.007	2.5764e-13	ILC2	Atp8b4
1700016P03Rik	1.69403e-17	0.363799	0.233	0.178	2.65065e-13	ILC2	1700016P03Rik
Ndufc2	1.73103e-17	0.28852	0.26	0.202	2.70854e-13	ILC2	Ndufc2
Map2k2	1.80256e-17	0.316927	0.258	0.2	2.82046e-13	ILC2	Map2k2
Pdk3	1.82806e-17	0.916444	0.053	0.028	2.86036e-13	ILC2	Pdk3
A330040F15Rik	2.04001e-17	2.19125	0.012	0.002	3.192e-13	ILC2	A330040F15Rik
Eif3g	2.06955e-17	0.285342	0.308	0.246	3.23823e-13	ILC2	Eif3g
Osgin1	2.07716e-17	0.462321	0.114	0.075	3.25014e-13	ILC2	Osgin1
Hemk1	2.21268e-17	1.02054	0.041	0.02	3.46218e-13	ILC2	Hemk1
Sema6d	2.25352e-17	2.2634	0.014	0.003	3.52608e-13	ILC2	Sema6d
Slx4	2.26991e-17	1.12978	0.038	0.017	3.55173e-13	ILC2	Slx4
Nfu1	2.51081e-17	0.660097	0.081	0.049	3.92866e-13	ILC2	Nfu1
Mlec	2.87107e-17	0.363798	0.21	0.158	4.49236e-13	ILC2	Mlec
Acsl5	2.92248e-17	0.406406	0.195	0.145	4.5728e-13	ILC2	Acsl5
E230032D23Rik	3.15266e-17	1.86747	0.018	0.005	4.93297e-13	ILC2	E230032D23Rik
Cdk4	3.26723e-17	0.424164	0.177	0.13	5.11224e-13	ILC2	Cdk4
Fam49b	3.27069e-17	0.26476	0.311	0.248	5.11765e-13	ILC2	Fam49b
Tsg101	3.30159e-17	0.410884	0.186	0.137	5.166e-13	ILC2	Tsg101
Sdf2	3.49565e-17	0.329505	0.225	0.171	5.46965e-13	ILC2	Sdf2
Tns1	3.7479e-17	2.07533	0.013	0.003	5.86434e-13	ILC2	Tns1
Herc2	4.00005e-17	0.482461	0.145	0.102	6.25888e-13	ILC2	Herc2
Ebp	4.40257e-17	0.55239	0.126	0.087	6.88871e-13	ILC2	Ebp
Syngr2	4.78729e-17	0.284963	0.297	0.237	7.49067e-13	ILC2	Syngr2
Mrps24	4.89427e-17	0.402631	0.168	0.122	7.65806e-13	ILC2	Mrps24
Ston2	5.53017e-17	0.59009	0.097	0.062	8.65306e-13	ILC2	Ston2
Gm19951	5.55219e-17	0.365707	0.24	0.185	8.68751e-13	ILC2	Gm19951
Mnat1	5.73145e-17	0.519608	0.117	0.078	8.968e-13	ILC2	Mnat1
0610030E20Rik	5.75137e-17	1.07734	0.04	0.019	8.99916e-13	ILC2	0610030E20Rik
Zfp62	5.9369e-17	0.4258	0.18	0.132	9.28947e-13	ILC2	Zfp62
Ssbp2	6.32837e-17	0.440346	0.146	0.102	9.902e-13	ILC2	Ssbp2
Fer	6.45567e-17	2.60736	0.01	0.002	1.01012e-12	ILC2	Fer
Ascc1	6.46481e-17	0.58044	0.101	0.066	1.01155e-12	ILC2	Ascc1
Mrpl45	6.57048e-17	0.652629	0.088	0.055	1.02808e-12	ILC2	Mrpl45
Igbp1	7.20534e-17	0.336148	0.22	0.167	1.12742e-12	ILC2	Igbp1
Cacybp	7.34652e-17	0.471661	0.146	0.103	1.14951e-12	ILC2	Cacybp
Zfp263	7.38665e-17	0.808523	0.062	0.035	1.15579e-12	ILC2	Zfp263
Snapc1	7.53654e-17	0.605249	0.107	0.071	1.17924e-12	ILC2	Snapc1
Zmynd11	7.59001e-17	0.294059	0.274	0.216	1.18761e-12	ILC2	Zmynd11
Rbis	7.76811e-17	0.357562	0.218	0.166	1.21548e-12	ILC2	Rbis
Pik3r5	7.77264e-17	0.53752	0.096	0.061	1.21618e-12	ILC2	Pik3r5
Ndufb1-ps	7.8491e-17	0.258351	0.309	0.247	1.22815e-12	ILC2	Ndufb1-ps
1700056E22Rik	8.13446e-17	1.08506	0.031	0.013	1.2728e-12	ILC2	1700056E22Rik
Cd274	9.58225e-17	0.722633	0.071	0.042	1.49933e-12	ILC2	Cd274
H2-T23	1.0102e-16	0.165031	0.553	0.47	1.58065e-12	ILC2	H2-T23
Mdh2	1.08077e-16	0.209282	0.388	0.318	1.69108e-12	ILC2	Mdh2
Utrn	1.12261e-16	0.252512	0.33	0.267	1.75655e-12	ILC2	Utrn
Kcnk5	1.12667e-16	0.814141	0.065	0.038	1.7629e-12	ILC2	Kcnk5
2510039O18Rik	1.25882e-16	0.546558	0.101	0.066	1.96968e-12	ILC2	2510039O18Rik
Tmtc4	1.26954e-16	0.9772	0.045	0.023	1.98645e-12	ILC2	Tmtc4
Grcc10	1.27783e-16	0.330264	0.247	0.192	1.99941e-12	ILC2	Grcc10
Herc3	1.35488e-16	0.794124	0.062	0.035	2.11998e-12	ILC2	Herc3
Glcci1	1.36561e-16	1.12031	0.036	0.017	2.13677e-12	ILC2	Glcci1
Trrap	1.37813e-16	0.565537	0.115	0.077	2.15637e-12	ILC2	Trrap
Atp13a1	1.39081e-16	0.778965	0.069	0.041	2.17621e-12	ILC2	Atp13a1
Fundc2	1.41832e-16	0.443279	0.171	0.125	2.21925e-12	ILC2	Fundc2
Ppan	1.42832e-16	0.76152	0.068	0.04	2.23489e-12	ILC2	Ppan
Epc2	1.43436e-16	0.385736	0.189	0.141	2.24435e-12	ILC2	Epc2
Atmin	1.44265e-16	0.514939	0.114	0.076	2.25731e-12	ILC2	Atmin
Cd72	1.45244e-16	0.43302	0.174	0.128	2.27263e-12	ILC2	Cd72
Zmym4	1.50855e-16	0.555533	0.094	0.061	2.36043e-12	ILC2	Zmym4
Tsr1	1.50969e-16	0.835469	0.059	0.033	2.36221e-12	ILC2	Tsr1
Snrnp48	1.523e-16	0.455824	0.147	0.104	2.38304e-12	ILC2	Snrnp48
Tmed1	1.57238e-16	1.31962	0.026	0.01	2.46031e-12	ILC2	Tmed1
Milr1	1.57582e-16	0.73779	0.089	0.056	2.46569e-12	ILC2	Milr1
Hp1bp3	1.63972e-16	0.243343	0.344	0.281	2.56568e-12	ILC2	Hp1bp3
Arid3b	1.65413e-16	0.97298	0.045	0.023	2.58822e-12	ILC2	Arid3b
Fam120a	1.66816e-16	0.558712	0.11	0.073	2.61017e-12	ILC2	Fam120a
Csnk2a1	1.70257e-16	0.354944	0.21	0.159	2.66401e-12	ILC2	Csnk2a1
Nsun2	1.73704e-16	0.43696	0.151	0.107	2.71794e-12	ILC2	Nsun2
Ccdc88b	1.76383e-16	0.488492	0.124	0.085	2.75986e-12	ILC2	Ccdc88b
Itsn2	1.81485e-16	0.257776	0.296	0.236	2.83969e-12	ILC2	Itsn2
Taf7	1.82778e-16	0.300336	0.273	0.216	2.85993e-12	ILC2	Taf7
Trim30a	1.85399e-16	0.455643	0.155	0.111	2.90094e-12	ILC2	Trim30a
Foxp1	1.86308e-16	0.27678	0.28	0.222	2.91517e-12	ILC2	Foxp1
Atp13a2	1.87867e-16	1.66074	0.018	0.006	2.93955e-12	ILC2	Atp13a2
Gapdh	1.915e-16	0.128909	0.785	0.698	2.99639e-12	ILC2	Gapdh
Hist3h2a	1.91616e-16	0.759666	0.071	0.042	2.99821e-12	ILC2	Hist3h2a
Ppfibp1	1.92656e-16	0.795776	0.068	0.04	3.01448e-12	ILC2	Ppfibp1
Atp6v0b	2.28427e-16	0.302389	0.263	0.207	3.57419e-12	ILC2	Atp6v0b
Ugp2	2.30264e-16	0.470806	0.13	0.09	3.60293e-12	ILC2	Ugp2
Kif3a	2.32694e-16	0.921196	0.051	0.027	3.64097e-12	ILC2	Kif3a
Fhit	2.35622e-16	0.997449	0.04	0.019	3.68678e-12	ILC2	Fhit
H2afj	2.36871e-16	0.371902	0.218	0.167	3.70631e-12	ILC2	H2afj
St7	2.38693e-16	0.819911	0.06	0.034	3.73483e-12	ILC2	St7
Capn1	2.40493e-16	0.554244	0.109	0.073	3.763e-12	ILC2	Capn1
Ipo4	2.70769e-16	1.35706	0.028	0.012	4.23673e-12	ILC2	Ipo4
Pgk1	2.74598e-16	0.322069	0.227	0.174	4.29664e-12	ILC2	Pgk1
Vegfb	2.76692e-16	1.23955	0.029	0.012	4.3294e-12	ILC2	Vegfb
Plekha7	2.85166e-16	1.46195	0.022	0.008	4.46199e-12	ILC2	Plekha7
Gdi2	2.98616e-16	0.18035	0.392	0.323	4.67244e-12	ILC2	Gdi2
Pwwp3a	2.99101e-16	0.71834	0.081	0.05	4.68004e-12	ILC2	Pwwp3a
Phtf2	3.01031e-16	0.542302	0.102	0.067	4.71023e-12	ILC2	Phtf2
Ier3ip1	3.0333e-16	0.285402	0.262	0.205	4.7462e-12	ILC2	Ier3ip1
Gatd1	3.05715e-16	0.672312	0.076	0.047	4.78352e-12	ILC2	Gatd1
Numb	3.07659e-16	0.685989	0.074	0.044	4.81395e-12	ILC2	Numb
Tmem87a	3.10836e-16	0.534997	0.108	0.072	4.86364e-12	ILC2	Tmem87a
Timm9	3.43037e-16	0.875796	0.047	0.025	5.3675e-12	ILC2	Timm9
Lrrk1	3.45938e-16	1.21735	0.029	0.012	5.41289e-12	ILC2	Lrrk1
Mpc2	3.48014e-16	0.327642	0.226	0.174	5.44538e-12	ILC2	Mpc2
Eif3b	3.49735e-16	0.468377	0.15	0.107	5.47231e-12	ILC2	Eif3b
Mef2d	3.74637e-16	0.370841	0.197	0.148	5.86195e-12	ILC2	Mef2d
Gabarap	3.83694e-16	0.185999	0.488	0.415	6.00366e-12	ILC2	Gabarap
Map4k5	4.07754e-16	1.01547	0.037	0.018	6.38012e-12	ILC2	Map4k5
Kras	4.09192e-16	0.300094	0.251	0.197	6.40262e-12	ILC2	Kras
H13	4.28128e-16	0.190004	0.344	0.277	6.69892e-12	ILC2	H13
Srm	4.34811e-16	0.96384	0.041	0.02	6.80348e-12	ILC2	Srm
2700097O09Rik	4.47443e-16	0.909974	0.047	0.025	7.00114e-12	ILC2	2700097O09Rik
Prodh	4.55088e-16	2.01259	0.013	0.003	7.12076e-12	ILC2	Prodh
Trim27	4.64437e-16	0.447228	0.126	0.087	7.26704e-12	ILC2	Trim27
Rap1gds1	4.71285e-16	0.425636	0.152	0.11	7.3742e-12	ILC2	Rap1gds1
Ube2m	4.75799e-16	0.411391	0.172	0.127	7.44482e-12	ILC2	Ube2m
Adgrl1	4.77514e-16	0.539208	0.105	0.07	7.47166e-12	ILC2	Adgrl1
Acbd6	5.02141e-16	0.38724	0.189	0.142	7.857e-12	ILC2	Acbd6
Eif3l	5.10563e-16	0.348973	0.209	0.159	7.98878e-12	ILC2	Eif3l
Dnmt3a	5.38175e-16	0.703221	0.069	0.041	8.42082e-12	ILC2	Dnmt3a
Tnrc6c	5.7558e-16	0.379245	0.199	0.151	9.00609e-12	ILC2	Tnrc6c
Thumpd1	5.873e-16	0.576461	0.104	0.069	9.18948e-12	ILC2	Thumpd1
Limd2	5.90454e-16	0.170174	0.373	0.304	9.23884e-12	ILC2	Limd2
Slc35d1	5.94146e-16	0.881653	0.046	0.024	9.29661e-12	ILC2	Slc35d1
Nrd1	5.94722e-16	0.262096	0.255	0.199	9.30561e-12	ILC2	Nrd1
AI854703	5.97669e-16	1.14198	0.03	0.013	9.35172e-12	ILC2	AI854703
Gm16008	6.07059e-16	1.92333	0.014	0.003	9.49865e-12	ILC2	Gm16008
Amfr	6.14329e-16	0.420942	0.153	0.111	9.61241e-12	ILC2	Amfr
Fam172a	6.33043e-16	0.394412	0.163	0.119	9.90522e-12	ILC2	Fam172a
Utp14b	6.6721e-16	1.42567	0.023	0.008	1.04398e-11	ILC2	Utp14b
Nolc1	6.84935e-16	0.423929	0.192	0.145	1.07172e-11	ILC2	Nolc1
A630089N07Rik	6.86153e-16	1.34389	0.021	0.008	1.07362e-11	ILC2	A630089N07Rik
Hook3	7.00984e-16	0.520199	0.128	0.089	1.09683e-11	ILC2	Hook3
Fli1	7.26694e-16	0.300639	0.261	0.206	1.13706e-11	ILC2	Fli1
Ccnt1	7.27507e-16	0.286078	0.242	0.188	1.13833e-11	ILC2	Ccnt1
Arhgef18	7.35748e-16	0.86301	0.05	0.027	1.15123e-11	ILC2	Arhgef18
Mfng	7.36518e-16	0.577365	0.089	0.057	1.15243e-11	ILC2	Mfng
Abracl	7.62193e-16	0.238458	0.308	0.247	1.1926e-11	ILC2	Abracl
Hps4	7.64297e-16	0.46883	0.139	0.099	1.1959e-11	ILC2	Hps4
Rab14	7.69013e-16	0.287511	0.284	0.228	1.20327e-11	ILC2	Rab14
Ccdc82	7.77634e-16	0.385629	0.165	0.121	1.21676e-11	ILC2	Ccdc82
Polr2e	8.09458e-16	0.313697	0.207	0.157	1.26656e-11	ILC2	Polr2e
Ercc5	8.30064e-16	0.774407	0.064	0.038	1.2988e-11	ILC2	Ercc5
Sbf2	8.31043e-16	0.817104	0.053	0.029	1.30033e-11	ILC2	Sbf2
Suclg2	8.76695e-16	0.508259	0.105	0.07	1.37176e-11	ILC2	Suclg2
Eci2	8.80581e-16	0.755144	0.066	0.039	1.37784e-11	ILC2	Eci2
Abce1	9.34062e-16	0.579188	0.105	0.07	1.46153e-11	ILC2	Abce1
Ccar1	9.63762e-16	0.300822	0.256	0.202	1.508e-11	ILC2	Ccar1
Elavl1	9.87431e-16	0.285173	0.275	0.219	1.54503e-11	ILC2	Elavl1
Cdk2ap1	1.03099e-15	0.480457	0.143	0.102	1.61319e-11	ILC2	Cdk2ap1
Usp34	1.14833e-15	0.274379	0.241	0.187	1.79679e-11	ILC2	Usp34
Calcrl	1.23294e-15	1.00693	0.041	0.02	1.92918e-11	ILC2	Calcrl
Gdf11	1.24316e-15	1.87345	0.015	0.004	1.94517e-11	ILC2	Gdf11
Reep5	1.31893e-15	0.250613	0.26	0.204	2.06373e-11	ILC2	Reep5
Slfn8	1.36367e-15	0.868318	0.045	0.023	2.13373e-11	ILC2	Slfn8
Casd1	1.36572e-15	0.78332	0.052	0.029	2.13695e-11	ILC2	Casd1
Hsd17b10	1.37071e-15	0.490041	0.131	0.092	2.14475e-11	ILC2	Hsd17b10
Zfp655	1.44e-15	0.594202	0.101	0.067	2.25316e-11	ILC2	Zfp655
2025-09-08	1.47276e-15	0.485301	0.121	0.083	2.30442e-11	ILC2	2025-09-08
Cstb	1.49976e-15	0.400236	0.329	0.273	2.34668e-11	ILC2	Cstb
Pofut1	1.54207e-15	0.779116	0.06	0.034	2.41288e-11	ILC2	Pofut1
Plcb1	1.64131e-15	1.34357	0.026	0.01	2.56815e-11	ILC2	Plcb1
Atp11a	1.74585e-15	1.22687	0.026	0.011	2.73173e-11	ILC2	Atp11a
Coq10b	1.83496e-15	0.160081	0.597	0.522	2.87117e-11	ILC2	Coq10b
Gltp	1.91203e-15	0.423433	0.157	0.114	2.99175e-11	ILC2	Gltp
Rsad2	1.92166e-15	1.10134	0.02	0.007	3.00682e-11	ILC2	Rsad2
Pdxk	2.07689e-15	0.83831	0.047	0.025	3.24971e-11	ILC2	Pdxk
Dmac1	2.08798e-15	0.743264	0.068	0.041	3.26707e-11	ILC2	Dmac1
Zbtb8os	2.20241e-15	0.591179	0.09	0.058	3.44611e-11	ILC2	Zbtb8os
Icos	2.22281e-15	0.143729	0.513	0.435	3.47803e-11	ILC2	Icos
Nmnat2	2.24946e-15	0.701186	0.042	0.021	3.51973e-11	ILC2	Nmnat2
Rnf114	2.27679e-15	0.288656	0.216	0.166	3.5625e-11	ILC2	Rnf114
Usp25	2.2773e-15	0.227495	0.346	0.285	3.56329e-11	ILC2	Usp25
Nepro	2.49372e-15	1.04383	0.036	0.017	3.90193e-11	ILC2	Nepro
Mrpl15	2.52733e-15	0.585641	0.092	0.06	3.95452e-11	ILC2	Mrpl15
Gm34006	2.53263e-15	2.04409	0.011	0.002	3.9628e-11	ILC2	Gm34006
Erg28	2.71172e-15	0.718303	0.075	0.047	4.24303e-11	ILC2	Erg28
Cebpz	2.82684e-15	0.293876	0.259	0.205	4.42316e-11	ILC2	Cebpz
Gsdmd	2.82711e-15	0.462454	0.135	0.096	4.42358e-11	ILC2	Gsdmd
Plekha8	2.86589e-15	1.58533	0.018	0.006	4.48426e-11	ILC2	Plekha8
Kifc3	2.9011e-15	2.05395	0.011	0.002	4.53935e-11	ILC2	Kifc3
Rbm3	2.91438e-15	0.136585	0.761	0.684	4.56013e-11	ILC2	Rbm3
Dleu2	3.17768e-15	0.671059	0.072	0.044	4.97212e-11	ILC2	Dleu2
Abcg3	3.46231e-15	0.995467	0.034	0.016	5.41748e-11	ILC2	Abcg3
Trim12c	3.49899e-15	0.66829	0.07	0.042	5.47487e-11	ILC2	Trim12c
Hsbp1	3.51686e-15	0.389396	0.175	0.131	5.50283e-11	ILC2	Hsbp1
Akap13	3.62084e-15	0.139505	0.515	0.44	5.66553e-11	ILC2	Akap13
Vps13c	3.67069e-15	0.630518	0.073	0.045	5.74353e-11	ILC2	Vps13c
Pwwp2b	4.10884e-15	1.21449	0.025	0.01	6.4291e-11	ILC2	Pwwp2b
Nudt21	4.45426e-15	0.258613	0.266	0.211	6.96959e-11	ILC2	Nudt21
Prkacb	4.56728e-15	0.301663	0.227	0.176	7.14642e-11	ILC2	Prkacb
Grk2	4.68101e-15	0.310149	0.217	0.167	7.32437e-11	ILC2	Grk2
Tex264	4.68417e-15	0.529531	0.105	0.071	7.32932e-11	ILC2	Tex264
Cyba	4.72125e-15	0.136003	0.601	0.518	7.38733e-11	ILC2	Cyba
Patz1	4.98102e-15	0.920256	0.038	0.019	7.79381e-11	ILC2	Patz1
Hectd3	5.40047e-15	0.975961	0.042	0.022	8.45011e-11	ILC2	Hectd3
Ncoa4	5.80307e-15	0.442371	0.136	0.097	9.08007e-11	ILC2	Ncoa4
Aida	5.91485e-15	0.791577	0.065	0.039	9.25497e-11	ILC2	Aida
Tmem258	5.99666e-15	0.218972	0.347	0.285	9.38297e-11	ILC2	Tmem258
Parp3	6.06024e-15	0.80085	0.056	0.032	9.48246e-11	ILC2	Parp3
Tmem14c	6.30347e-15	0.290142	0.252	0.199	9.86303e-11	ILC2	Tmem14c
Stk38	6.46153e-15	0.413773	0.142	0.102	1.01104e-10	ILC2	Stk38
mt-Nd3	6.48333e-15	0.145242	0.655	0.576	1.01445e-10	ILC2	mt-Nd3
Dst	6.66075e-15	0.941473	0.033	0.015	1.04221e-10	ILC2	Dst
P4hb	6.72844e-15	0.248387	0.282	0.225	1.0528e-10	ILC2	P4hb
Frs2	6.74958e-15	0.831913	0.054	0.03	1.05611e-10	ILC2	Frs2
Smap1	7.07641e-15	0.233703	0.329	0.268	1.10725e-10	ILC2	Smap1
Vti1a	7.08327e-15	0.496764	0.112	0.077	1.10832e-10	ILC2	Vti1a
Pmvk	7.16171e-15	1.27274	0.026	0.011	1.12059e-10	ILC2	Pmvk
Ccdc122	7.20671e-15	1.64732	0.017	0.005	1.12763e-10	ILC2	Ccdc122
St3gal2	7.33887e-15	1.15176	0.029	0.013	1.14831e-10	ILC2	St3gal2
Sorl1	7.67219e-15	0.255932	0.319	0.26	1.20047e-10	ILC2	Sorl1
Spag4	8.66493e-15	2.01437	0.012	0.003	1.3558e-10	ILC2	Spag4
Bdh1	9.25032e-15	1.39972	0.021	0.008	1.4474e-10	ILC2	Bdh1
Polg	9.49969e-15	0.791683	0.049	0.027	1.48642e-10	ILC2	Polg
Relch	1.02409e-14	0.540024	0.096	0.064	1.6024e-10	ILC2	Relch
Birc6	1.04019e-14	0.272521	0.296	0.24	1.62758e-10	ILC2	Birc6
Psmb4	1.09948e-14	0.219849	0.359	0.296	1.72035e-10	ILC2	Psmb4
Ttc28	1.09973e-14	0.466531	0.105	0.071	1.72074e-10	ILC2	Ttc28
Tm9sf3	1.10471e-14	0.17543	0.401	0.334	1.72853e-10	ILC2	Tm9sf3
Zfp746	1.13682e-14	0.723789	0.062	0.037	1.77878e-10	ILC2	Zfp746
Rab39	1.16376e-14	1.37588	0.021	0.008	1.82094e-10	ILC2	Rab39
Zfp992	1.19348e-14	0.976723	0.039	0.019	1.86744e-10	ILC2	Zfp992
Phf11b	1.26406e-14	1.44896	0.019	0.007	1.97788e-10	ILC2	Phf11b
Emc2	1.2708e-14	0.371188	0.176	0.132	1.98842e-10	ILC2	Emc2
Mdm4	1.34741e-14	0.328496	0.198	0.152	2.10829e-10	ILC2	Mdm4
Lmbrd1	1.38231e-14	0.420851	0.146	0.106	2.16291e-10	ILC2	Lmbrd1
Mrpl14	1.38273e-14	0.478658	0.121	0.085	2.16356e-10	ILC2	Mrpl14
Nifk	1.498e-14	0.687502	0.073	0.046	2.34392e-10	ILC2	Nifk
Sf3b3	1.51674e-14	0.407545	0.128	0.091	2.37324e-10	ILC2	Sf3b3
Gm20559	1.52408e-14	0.736609	0.063	0.038	2.38473e-10	ILC2	Gm20559
Klhl24	1.5431e-14	0.32766	0.197	0.151	2.41448e-10	ILC2	Klhl24
Ago2	1.56212e-14	0.195789	0.371	0.307	2.44424e-10	ILC2	Ago2
Casc3	1.58461e-14	0.477124	0.116	0.08	2.47944e-10	ILC2	Casc3
Snrnp25	1.62033e-14	0.615341	0.071	0.043	2.53534e-10	ILC2	Snrnp25
Gm41804	1.64409e-14	1.53642	0.018	0.006	2.57251e-10	ILC2	Gm41804
Ccnk	1.74542e-14	0.379044	0.172	0.129	2.73107e-10	ILC2	Ccnk
Ddx21	1.74669e-14	0.236987	0.317	0.259	2.73305e-10	ILC2	Ddx21
Rdh14	1.85972e-14	0.87939	0.046	0.024	2.9099e-10	ILC2	Rdh14
Med31	1.88288e-14	0.451492	0.213	0.167	2.94614e-10	ILC2	Med31
Rida	1.89719e-14	0.956739	0.038	0.019	2.96854e-10	ILC2	Rida
Ndufb3	1.96064e-14	0.318488	0.208	0.16	3.06782e-10	ILC2	Ndufb3
Taf1b	2.00756e-14	0.683231	0.066	0.04	3.14122e-10	ILC2	Taf1b
Lnx2	2.02204e-14	0.926366	0.039	0.02	3.16388e-10	ILC2	Lnx2
Nfat5	2.11371e-14	0.465921	0.117	0.082	3.30733e-10	ILC2	Nfat5
Sh3bgrl2	2.13577e-14	1.18046	0.027	0.012	3.34184e-10	ILC2	Sh3bgrl2
Trappc6a	2.15414e-14	0.452655	0.136	0.098	3.37059e-10	ILC2	Trappc6a
Tm2d3	2.16489e-14	0.953061	0.038	0.019	3.3874e-10	ILC2	Tm2d3
Smim8	2.22166e-14	0.672656	0.067	0.041	3.47623e-10	ILC2	Smim8
Adcy9	2.36814e-14	2.43333	0.01	0.002	3.70542e-10	ILC2	Adcy9
Por	2.37905e-14	0.476012	0.111	0.077	3.7225e-10	ILC2	Por
Sirt2	2.40247e-14	0.323814	0.191	0.145	3.75915e-10	ILC2	Sirt2
Kat2b	2.6215e-14	0.58207	0.096	0.064	4.10186e-10	ILC2	Kat2b
Wdr86	2.6875e-14	0.878208	0.039	0.02	4.20513e-10	ILC2	Wdr86
Dgka	2.76647e-14	0.408879	0.144	0.104	4.32869e-10	ILC2	Dgka
Ppp1r13b	2.77665e-14	0.526435	0.081	0.052	4.34462e-10	ILC2	Ppp1r13b
Chuk	2.82131e-14	0.450824	0.128	0.091	4.4145e-10	ILC2	Chuk
Pes1	3.02647e-14	0.517932	0.099	0.067	4.73552e-10	ILC2	Pes1
Unkl	3.10592e-14	0.974488	0.037	0.019	4.85983e-10	ILC2	Unkl
Gm14305	3.23981e-14	1.21504	0.029	0.013	5.06933e-10	ILC2	Gm14305
Actr1b	3.56004e-14	0.427902	0.152	0.113	5.5704e-10	ILC2	Actr1b
Grap2	3.56311e-14	0.393088	0.145	0.106	5.5752e-10	ILC2	Grap2
Pigs	3.73825e-14	0.611587	0.084	0.055	5.84924e-10	ILC2	Pigs
Irgm1	3.75163e-14	0.748468	0.062	0.037	5.87018e-10	ILC2	Irgm1
Clcn6	4.0628e-14	0.868716	0.04	0.02	6.35707e-10	ILC2	Clcn6
Eif4a2	4.26768e-14	0.141891	0.609	0.533	6.67765e-10	ILC2	Eif4a2
Pigt	4.71565e-14	0.713675	0.064	0.039	7.37859e-10	ILC2	Pigt
Emc6	4.93388e-14	0.333287	0.2	0.154	7.72005e-10	ILC2	Emc6
Mrps15	5.43312e-14	0.364766	0.149	0.109	8.5012e-10	ILC2	Mrps15
Sec61b	5.48752e-14	0.114751	0.473	0.398	8.58632e-10	ILC2	Sec61b
Ubr4	5.54365e-14	0.436143	0.134	0.097	8.67414e-10	ILC2	Ubr4
Atxn7	5.66834e-14	0.335047	0.199	0.154	8.86924e-10	ILC2	Atxn7
Itfg1	5.67209e-14	0.530748	0.099	0.067	8.87512e-10	ILC2	Itfg1
Ambra1	5.99829e-14	0.499811	0.107	0.074	9.38552e-10	ILC2	Ambra1
Gm32856	6.02031e-14	1.87006	0.011	0.003	9.41998e-10	ILC2	Gm32856
Usp16	6.75969e-14	0.30458	0.215	0.167	1.05769e-09	ILC2	Usp16
Mrpl19	6.76448e-14	0.60194	0.067	0.041	1.05844e-09	ILC2	Mrpl19
Tsr2	6.79637e-14	0.601293	0.074	0.047	1.06343e-09	ILC2	Tsr2
Foxa1	6.97057e-14	1.76297	0.013	0.004	1.09069e-09	ILC2	Foxa1
Ganab	7.44417e-14	0.553542	0.086	0.057	1.16479e-09	ILC2	Ganab
Eed	8.01381e-14	0.347901	0.175	0.133	1.25392e-09	ILC2	Eed
Gm26917	8.1229e-14	0.493536	0.111	0.077	1.27099e-09	ILC2	Gm26917
Sltm	8.73803e-14	0.201275	0.35	0.291	1.36724e-09	ILC2	Sltm
Dbi	8.9624e-14	0.368257	0.16	0.119	1.40235e-09	ILC2	Dbi
Rfk	9.11659e-14	0.38178	0.149	0.11	1.42647e-09	ILC2	Rfk
Raph1	9.15434e-14	2.05808	0.013	0.003	1.43238e-09	ILC2	Raph1
Ndufb10	9.27399e-14	0.280705	0.206	0.16	1.4511e-09	ILC2	Ndufb10
Rnf213	9.35808e-14	0.440505	0.13	0.094	1.46426e-09	ILC2	Rnf213
Ndufb4	9.91093e-14	0.280952	0.242	0.193	1.55076e-09	ILC2	Ndufb4
Klhl15	9.95584e-14	1.01266	0.035	0.017	1.55779e-09	ILC2	Klhl15
Mfsd10	9.95605e-14	0.476953	0.113	0.079	1.55782e-09	ILC2	Mfsd10
Ankrd10	1.03706e-13	0.625315	0.077	0.049	1.62269e-09	ILC2	Ankrd10
2900092C05Rik	1.05595e-13	1.49535	0.018	0.006	1.65224e-09	ILC2	2900092C05Rik
Zhx3	1.07324e-13	1.18695	0.025	0.011	1.67929e-09	ILC2	Zhx3
Mettl1	1.08494e-13	0.888423	0.045	0.024	1.69761e-09	ILC2	Mettl1
Srpk1	1.0855e-13	0.282149	0.237	0.189	1.69848e-09	ILC2	Srpk1
Celsr1	1.11617e-13	1.80937	0.013	0.003	1.74647e-09	ILC2	Celsr1
Rcl1	1.12781e-13	0.757175	0.058	0.035	1.76469e-09	ILC2	Rcl1
Ddx58	1.16565e-13	0.409285	0.143	0.104	1.82389e-09	ILC2	Ddx58
9930021J03Rik	1.21324e-13	0.491373	0.1	0.068	1.89835e-09	ILC2	9930021J03Rik
Slirp	1.22365e-13	0.581762	0.094	0.063	1.91464e-09	ILC2	Slirp
Ash1l	1.24773e-13	0.330453	0.169	0.127	1.95232e-09	ILC2	Ash1l
Homer1	1.30156e-13	0.675285	0.071	0.045	2.03655e-09	ILC2	Homer1
Pck2	1.3892e-13	0.738505	0.061	0.037	2.17369e-09	ILC2	Pck2
Lig4	1.39992e-13	2.15322	0.01	0.002	2.19045e-09	ILC2	Lig4
Cln6	1.42809e-13	0.790999	0.051	0.029	2.23454e-09	ILC2	Cln6
Zfp809	1.47099e-13	0.657315	0.07	0.044	2.30166e-09	ILC2	Zfp809
Ogfr	1.47207e-13	0.375316	0.166	0.125	2.30334e-09	ILC2	Ogfr
Taf3	1.53459e-13	0.459798	0.119	0.085	2.40118e-09	ILC2	Taf3
Ptcd2	1.55408e-13	0.973894	0.033	0.016	2.43167e-09	ILC2	Ptcd2
Atp6ap1	1.56615e-13	0.366212	0.156	0.116	2.45056e-09	ILC2	Atp6ap1
Ube2l3	1.65756e-13	0.179552	0.423	0.359	2.59359e-09	ILC2	Ube2l3
Uqcc3	1.70833e-13	0.51404	0.103	0.071	2.67303e-09	ILC2	Uqcc3
Pnpo	1.77227e-13	0.55928	0.088	0.058	2.77306e-09	ILC2	Pnpo
Zdhhc13	1.79972e-13	0.91278	0.038	0.02	2.81602e-09	ILC2	Zdhhc13
Chd9	1.89753e-13	0.2129	0.292	0.238	2.96907e-09	ILC2	Chd9
Celf1	1.99344e-13	0.405104	0.148	0.109	3.11913e-09	ILC2	Celf1
Ubqln1	2.05542e-13	0.299081	0.2	0.155	3.21612e-09	ILC2	Ubqln1
Zwint	2.17427e-13	0.409351	0.146	0.108	3.40208e-09	ILC2	Zwint
Gm43738	2.20963e-13	1.81089	0.013	0.004	3.45741e-09	ILC2	Gm43738
2900060B14Rik	2.26385e-13	0.863994	0.038	0.02	3.54225e-09	ILC2	2900060B14Rik
Hey1	2.36291e-13	0.747996	0.055	0.032	3.69724e-09	ILC2	Hey1
Ilf2	2.45802e-13	0.425209	0.135	0.098	3.84607e-09	ILC2	Ilf2
Sar1b	2.48504e-13	0.435225	0.136	0.099	3.88834e-09	ILC2	Sar1b
Zbtb20	2.51833e-13	0.315019	0.175	0.133	3.94042e-09	ILC2	Zbtb20
Cdc26	2.54734e-13	0.463373	0.131	0.095	3.98582e-09	ILC2	Cdc26
Pheta2	2.67213e-13	1.95855	0.011	0.003	4.18109e-09	ILC2	Pheta2
Pcyt2	2.68159e-13	0.70284	0.054	0.031	4.19589e-09	ILC2	Pcyt2
Flcn	3.04579e-13	0.711797	0.059	0.035	4.76574e-09	ILC2	Flcn
Tram1	3.0641e-13	0.212844	0.315	0.26	4.7944e-09	ILC2	Tram1
Fdps	3.0675e-13	0.70467	0.06	0.036	4.79972e-09	ILC2	Fdps
Polb	3.07482e-13	0.427801	0.137	0.1	4.81117e-09	ILC2	Polb
Thada	3.16745e-13	0.57035	0.084	0.055	4.9561e-09	ILC2	Thada
Cand1	3.19398e-13	0.470202	0.142	0.105	4.99763e-09	ILC2	Cand1
Cat	3.23774e-13	0.537142	0.091	0.061	5.06609e-09	ILC2	Cat
Cep120	3.36478e-13	0.458767	0.12	0.086	5.26487e-09	ILC2	Cep120
Hpf1	3.37965e-13	0.447572	0.117	0.083	5.28814e-09	ILC2	Hpf1
Rbck1	3.4236e-13	0.371682	0.158	0.118	5.3569e-09	ILC2	Rbck1
Agpat3	3.5581e-13	0.399284	0.155	0.116	5.56736e-09	ILC2	Agpat3
Atp5k	3.81609e-13	0.376907	0.174	0.133	5.97103e-09	ILC2	Atp5k
Dhx15	3.93977e-13	0.257293	0.252	0.203	6.16456e-09	ILC2	Dhx15
Slc16a7	3.95929e-13	2.0519	0.01	0.002	6.19511e-09	ILC2	Slc16a7
Rnf41	4.10115e-13	0.656937	0.057	0.034	6.41706e-09	ILC2	Rnf41
C1qtnf12	4.1659e-13	1.35962	0.02	0.008	6.51839e-09	ILC2	C1qtnf12
B3galnt2	4.26813e-13	0.709276	0.054	0.032	6.67834e-09	ILC2	B3galnt2
Carm1	4.53994e-13	0.798348	0.053	0.031	7.10364e-09	ILC2	Carm1
Rtcb	4.69246e-13	0.37907	0.153	0.114	7.3423e-09	ILC2	Rtcb
H2-Ke6	4.76333e-13	0.540867	0.104	0.072	7.45319e-09	ILC2	H2-Ke6
Smad3	5.08483e-13	0.317778	0.184	0.142	7.95624e-09	ILC2	Smad3
Tmx2	5.19471e-13	0.582497	0.085	0.056	8.12816e-09	ILC2	Tmx2
Ppp6r1	5.42866e-13	0.346412	0.176	0.135	8.49423e-09	ILC2	Ppp6r1
Ptpn2	5.59201e-13	0.176327	0.359	0.299	8.74982e-09	ILC2	Ptpn2
Rai1	5.79723e-13	0.394645	0.14	0.103	9.07092e-09	ILC2	Rai1
Adam10	5.91524e-13	0.375835	0.155	0.116	9.25558e-09	ILC2	Adam10
Tmem50b	6.0581e-13	0.601007	0.082	0.054	9.47911e-09	ILC2	Tmem50b
Prmt3	6.11893e-13	0.612684	0.064	0.04	9.57428e-09	ILC2	Prmt3
Dars	6.16043e-13	0.39816	0.155	0.117	9.63923e-09	ILC2	Dars
Gbp5	6.36083e-13	1.17264	0.024	0.011	9.9528e-09	ILC2	Gbp5
Mir155hg	6.40458e-13	0.886837	0.037	0.019	1.00212e-08	ILC2	Mir155hg
Emc4	6.42138e-13	0.331542	0.178	0.137	1.00475e-08	ILC2	Emc4
Rpa3	6.70161e-13	0.440684	0.119	0.085	1.0486e-08	ILC2	Rpa3
Pds5b	6.74101e-13	0.412948	0.132	0.096	1.05477e-08	ILC2	Pds5b
Pear1	6.93744e-13	0.691674	0.049	0.028	1.0855e-08	ILC2	Pear1
Elmo3	7.19368e-13	1.59858	0.014	0.004	1.1256e-08	ILC2	Elmo3
Coa5	7.34338e-13	0.522488	0.086	0.058	1.14902e-08	ILC2	Coa5
Ipo5	7.77209e-13	0.610349	0.087	0.058	1.2161e-08	ILC2	Ipo5
Mtmr3	8.22478e-13	0.442335	0.124	0.089	1.28693e-08	ILC2	Mtmr3
Nbas	8.2804e-13	0.65614	0.054	0.032	1.29563e-08	ILC2	Nbas
Ergic3	8.53365e-13	0.365058	0.153	0.114	1.33526e-08	ILC2	Ergic3
G3bp1	8.62968e-13	0.22211	0.327	0.273	1.35029e-08	ILC2	G3bp1
1110059E24Rik	8.9326e-13	0.866166	0.043	0.024	1.39768e-08	ILC2	1110059E24Rik
Fam160b1	9.11374e-13	0.764947	0.051	0.03	1.42603e-08	ILC2	Fam160b1
Tmem170b	9.16869e-13	0.745637	0.046	0.026	1.43463e-08	ILC2	Tmem170b
Arpc2	9.39719e-13	0.113954	0.722	0.642	1.47038e-08	ILC2	Arpc2
Ikbkb	9.68808e-13	0.325245	0.178	0.137	1.51589e-08	ILC2	Ikbkb
Rc3h1	9.82108e-13	0.466085	0.116	0.083	1.5367e-08	ILC2	Rc3h1
Crebzf	9.84576e-13	0.621407	0.08	0.053	1.54057e-08	ILC2	Crebzf
Psat1	1.00596e-12	0.917843	0.036	0.018	1.57403e-08	ILC2	Psat1
Pdia3	1.04153e-12	0.107124	0.751	0.677	1.62968e-08	ILC2	Pdia3
Neat1	1.05439e-12	0.505252	0.1	0.069	1.64981e-08	ILC2	Neat1
Rdm1	1.14636e-12	0.39989	0.131	0.096	1.7937e-08	ILC2	Rdm1
Abcc5	1.25683e-12	1.27499	0.021	0.008	1.96655e-08	ILC2	Abcc5
Ints14	1.26058e-12	0.625731	0.07	0.045	1.97242e-08	ILC2	Ints14
Mlkl	1.27092e-12	1.66195	0.014	0.004	1.98861e-08	ILC2	Mlkl
Pla2g6	1.29166e-12	0.954715	0.033	0.017	2.02105e-08	ILC2	Pla2g6
Map2k5	1.4273e-12	0.518167	0.086	0.058	2.2333e-08	ILC2	Map2k5
Dip2a	1.43893e-12	1.54238	0.015	0.005	2.2515e-08	ILC2	Dip2a
Vwa5a	1.45217e-12	0.599004	0.071	0.045	2.27221e-08	ILC2	Vwa5a
St13	1.49587e-12	0.25394	0.239	0.191	2.34058e-08	ILC2	St13
Atp5j	1.54542e-12	0.169363	0.475	0.413	2.41811e-08	ILC2	Atp5j
Cdipt	1.61215e-12	0.391097	0.147	0.11	2.52254e-08	ILC2	Cdipt
Dis3	1.74113e-12	0.855653	0.04	0.022	2.72435e-08	ILC2	Dis3
Usp24	1.78832e-12	0.491906	0.1	0.07	2.79819e-08	ILC2	Usp24
Prdx1	1.89126e-12	0.16556	0.46	0.398	2.95925e-08	ILC2	Prdx1
Dhx29	1.90497e-12	0.746401	0.048	0.027	2.98071e-08	ILC2	Dhx29
Gstp1	1.9322e-12	0.344809	0.159	0.12	3.02332e-08	ILC2	Gstp1
Smad4	2.05883e-12	0.358182	0.224	0.18	3.22146e-08	ILC2	Smad4
Parp10	2.08174e-12	0.655447	0.057	0.035	3.25729e-08	ILC2	Parp10
E2f6	2.12078e-12	1.12004	0.023	0.01	3.31838e-08	ILC2	E2f6
Tusc3	2.14546e-12	0.288786	0.214	0.17	3.35701e-08	ILC2	Tusc3
Slc39a11	2.14712e-12	1.03996	0.033	0.017	3.35959e-08	ILC2	Slc39a11
Vapb	2.21506e-12	0.337973	0.168	0.129	3.46591e-08	ILC2	Vapb
Eya3	2.25544e-12	0.801366	0.049	0.029	3.52908e-08	ILC2	Eya3
Miip	2.31395e-12	0.705013	0.057	0.035	3.62064e-08	ILC2	Miip
Usp36	2.51226e-12	0.412201	0.151	0.114	3.93093e-08	ILC2	Usp36
Tacc1	2.5916e-12	0.318156	0.191	0.149	4.05507e-08	ILC2	Tacc1
Cntrl	2.69247e-12	0.247198	0.236	0.189	4.21291e-08	ILC2	Cntrl
Slc4a7	2.81644e-12	0.406914	0.135	0.1	4.40688e-08	ILC2	Slc4a7
Gsr	2.82645e-12	0.347019	0.128	0.094	4.42254e-08	ILC2	Gsr
Hmg20b	2.84096e-12	0.393751	0.135	0.1	4.44526e-08	ILC2	Hmg20b
Alg5	2.95966e-12	0.47244	0.112	0.08	4.63098e-08	ILC2	Alg5
Qdpr	3.23369e-12	0.391604	0.135	0.1	5.05976e-08	ILC2	Qdpr
Atg16l2	3.40312e-12	0.592023	0.079	0.052	5.32487e-08	ILC2	Atg16l2
Ezh1	3.442e-12	0.391991	0.145	0.109	5.38569e-08	ILC2	Ezh1
Cul9	3.45644e-12	0.997589	0.029	0.014	5.40829e-08	ILC2	Cul9
Per3	3.47735e-12	1.27499	0.021	0.009	5.441e-08	ILC2	Per3
Aak1	3.75724e-12	0.268052	0.215	0.171	5.87895e-08	ILC2	Aak1
Mapk1	3.83992e-12	0.284576	0.204	0.161	6.00832e-08	ILC2	Mapk1
Armc3	4.07087e-12	1.46218	0.016	0.006	6.36969e-08	ILC2	Armc3
Syne2	4.0867e-12	0.658147	0.057	0.035	6.39446e-08	ILC2	Syne2
Akip1	4.08913e-12	0.898989	0.03	0.014	6.39826e-08	ILC2	Akip1
Dnajc19	4.15253e-12	0.328196	0.162	0.124	6.49746e-08	ILC2	Dnajc19
Themis	4.16888e-12	0.876767	0.034	0.018	6.52304e-08	ILC2	Themis
Mdp1	4.46847e-12	0.433326	0.111	0.08	6.99182e-08	ILC2	Mdp1
Apc	4.6614e-12	0.369238	0.141	0.106	7.2937e-08	ILC2	Apc
Nek7	5.08391e-12	0.208926	0.294	0.243	7.9548e-08	ILC2	Nek7
Phldb3	5.45614e-12	1.15582	0.025	0.012	8.53722e-08	ILC2	Phldb3
Cap1	5.47989e-12	0.197024	0.285	0.233	8.57439e-08	ILC2	Cap1
Cd1d1	5.59767e-12	0.935474	0.033	0.017	8.75867e-08	ILC2	Cd1d1
Gfer	5.62369e-12	0.671445	0.056	0.034	8.79939e-08	ILC2	Gfer
Tmem164	5.65989e-12	0.545117	0.086	0.059	8.85604e-08	ILC2	Tmem164
Chchd1	5.74479e-12	0.395298	0.154	0.117	8.98887e-08	ILC2	Chchd1
Agk	5.76226e-12	0.80167	0.039	0.021	9.01621e-08	ILC2	Agk
Npm3	5.81058e-12	0.313866	0.194	0.153	9.09182e-08	ILC2	Npm3
Kmt5a	6.05971e-12	0.401558	0.123	0.09	9.48163e-08	ILC2	Kmt5a
Gprasp1	6.61142e-12	0.558306	0.092	0.064	1.03449e-07	ILC2	Gprasp1
Lrrc8d	6.72817e-12	0.450451	0.102	0.072	1.05276e-07	ILC2	Lrrc8d
Med12	6.75556e-12	0.490172	0.092	0.064	1.05704e-07	ILC2	Med12
Kpnb1	6.81616e-12	0.3324	0.183	0.143	1.06653e-07	ILC2	Kpnb1
Smarce1	6.83181e-12	0.196357	0.284	0.233	1.06897e-07	ILC2	Smarce1
Ppp2r5a	6.93733e-12	0.187689	0.388	0.332	1.08548e-07	ILC2	Ppp2r5a
Ice2	7.34627e-12	1.03392	0.032	0.016	1.14947e-07	ILC2	Ice2
Gstcd	7.48223e-12	0.735022	0.056	0.035	1.17074e-07	ILC2	Gstcd
Ddx49	8.3495e-12	0.558568	0.075	0.049	1.30645e-07	ILC2	Ddx49
Rtp4	8.35832e-12	0.723762	0.044	0.025	1.30783e-07	ILC2	Rtp4
Erp44	8.40123e-12	0.29372	0.179	0.139	1.31454e-07	ILC2	Erp44
Psmb10	8.5822e-12	0.1871	0.325	0.272	1.34286e-07	ILC2	Psmb10
Dhx32	8.65451e-12	0.78448	0.042	0.024	1.35417e-07	ILC2	Dhx32
Elob	8.79996e-12	0.127808	0.521	0.455	1.37693e-07	ILC2	Elob
4933406I18Rik	9.05502e-12	1.05886	0.023	0.01	1.41684e-07	ILC2	4933406I18Rik
Pkn1	9.06108e-12	0.274836	0.234	0.189	1.41779e-07	ILC2	Pkn1
Wdr1	9.28325e-12	0.290107	0.2	0.158	1.45255e-07	ILC2	Wdr1
Rccd1	9.371e-12	0.790331	0.044	0.025	1.46628e-07	ILC2	Rccd1
Nol7	9.38582e-12	0.185335	0.329	0.276	1.4686e-07	ILC2	Nol7
Sf3b5	9.523e-12	0.196938	0.288	0.238	1.49006e-07	ILC2	Sf3b5
Hic1	9.69512e-12	0.476983	0.094	0.065	1.517e-07	ILC2	Hic1
Ndufs6	9.81628e-12	0.246958	0.233	0.187	1.53595e-07	ILC2	Ndufs6
Nle1	9.97561e-12	0.916598	0.031	0.016	1.56088e-07	ILC2	Nle1
2610002M06Rik	1.0173e-11	0.775775	0.045	0.026	1.59177e-07	ILC2	2610002M06Rik
Polr1c	1.03376e-11	0.329725	0.154	0.117	1.61752e-07	ILC2	Polr1c
[truncated: 9,306 more rows]

## Sheet: Table 1B. 6-week-old CD4 T DEG
	p_val	avg_log2FC	pct.1	pct.2	p_val_adj	cluster	gene
Nkg7	0	2.982	0.835	0.213	0	CD4 Trm	Nkg7
Ms4a4b	0	2.13384	0.812	0.322	0	CD4 Trm	Ms4a4b
Epsti1	0	2.32026	0.67	0.227	0	CD4 Trm	Epsti1
Ctsw	0	2.7682	0.484	0.089	0	CD4 Trm	Ctsw
Ccl5	0	4.15142	0.864	0.492	0	CD4 Trm	Ccl5
Ptpn22	0	1.22826	0.891	0.603	0	CD4 Trm	Ptpn22
Gimap4	0	1.00098	0.924	0.708	0	CD4 Trm	Gimap4
Zfp36l2	4.32866e-304	1.42556	0.782	0.472	6.62675e-300	CD4 Trm	Zfp36l2
Il12rb2	2.7575e-296	3.65396	0.41	0.05	4.22146e-292	CD4 Trm	Il12rb2
Sh2d2a	4.20203e-283	1.12488	0.852	0.603	6.43289e-279	CD4 Trm	Sh2d2a
Ifng	5.42635e-282	3.68706	0.398	0.049	8.3072e-278	CD4 Trm	Ifng
AW112010	3.81209e-260	0.911021	0.946	0.855	5.83592e-256	CD4 Trm	AW112010
Gzmk	5.96981e-241	4.45473	0.32	0.02	9.13918e-237	CD4 Trm	Gzmk
Dtx1	3.82939e-229	2.39416	0.409	0.092	5.86241e-225	CD4 Trm	Dtx1
Pik3r1	7.42632e-223	1.46961	0.639	0.337	1.1369e-218	CD4 Trm	Pik3r1
Klf3	6.13773e-221	2.04168	0.469	0.155	9.39625e-217	CD4 Trm	Klf3
Hcst	1.0344e-218	1.29563	0.674	0.385	1.58356e-214	CD4 Trm	Hcst
Pde3b	2.06322e-217	2.48655	0.381	0.078	3.15859e-213	CD4 Trm	Pde3b
Slfn2	3.16272e-210	1.41452	0.595	0.29	4.84181e-206	CD4 Trm	Slfn2
Slamf7	1.7293e-202	3.63197	0.299	0.031	2.64738e-198	CD4 Trm	Slamf7
Slc16a10	2.99726e-202	2.95989	0.334	0.055	4.5885e-198	CD4 Trm	Slc16a10
Cxcr3	2.43886e-200	2.12199	0.387	0.091	3.73365e-196	CD4 Trm	Cxcr3
Fasl	3.27464e-198	2.70567	0.339	0.06	5.01315e-194	CD4 Trm	Fasl
Rpl13a	3.13144e-196	0.804021	0.862	0.672	4.79393e-192	CD4 Trm	Rpl13a
Dnajc15	5.61905e-189	1.8194	0.446	0.156	8.60221e-185	CD4 Trm	Dnajc15
Ms4a6b	1.57155e-188	1.05861	0.729	0.477	2.40588e-184	CD4 Trm	Ms4a6b
Hmgb2	1.34143e-186	0.899318	0.823	0.605	2.05359e-182	CD4 Trm	Hmgb2
Rac2	1.89302e-186	0.637918	0.953	0.872	2.89802e-182	CD4 Trm	Rac2
Serpinb6b	7.37246e-186	1.69131	0.5	0.213	1.12865e-181	CD4 Trm	Serpinb6b
Cd52	6.44107e-178	0.781623	0.901	0.774	9.86063e-174	CD4 Trm	Cd52
Gm8369	2.01008e-171	1.28631	0.594	0.328	3.07723e-167	CD4 Trm	Gm8369
Gramd3	2.40648e-171	1.79282	0.49	0.23	3.68408e-167	CD4 Trm	Gramd3
Lat	6.6192e-171	0.833778	0.791	0.573	1.01333e-166	CD4 Trm	Lat
Gdi2	8.03501e-171	1.10966	0.674	0.431	1.23008e-166	CD4 Trm	Gdi2
Gzma	8.92399e-171	1.91552	0.485	0.217	1.36617e-166	CD4 Trm	Gzma
Tcf7	2.05787e-167	2.19123	0.349	0.09	3.1504e-163	CD4 Trm	Tcf7
Thy1	5.85471e-165	1.17974	0.598	0.328	8.96298e-161	CD4 Trm	Thy1
Wipf1	6.49141e-162	1.40723	0.488	0.219	9.9377e-158	CD4 Trm	Wipf1
Gimap6	1.7723e-160	0.603829	0.939	0.809	2.71321e-156	CD4 Trm	Gimap6
Plac8	1.88977e-160	0.976767	0.61	0.317	2.89305e-156	CD4 Trm	Plac8
Themis	5.1879e-157	2.47879	0.297	0.06	7.94215e-153	CD4 Trm	Themis
Inpp1	1.92518e-156	2.02358	0.351	0.101	2.94725e-152	CD4 Trm	Inpp1
Rps11	3.06828e-152	0.376639	0.999	0.997	4.69723e-148	CD4 Trm	Rps11
Pde7a	5.88526e-152	2.0599	0.327	0.086	9.00975e-148	CD4 Trm	Pde7a
Gtf2i	1.70375e-149	1.82444	0.373	0.127	2.60828e-145	CD4 Trm	Gtf2i
Gpr171	2.02603e-149	1.65911	0.393	0.141	3.10164e-145	CD4 Trm	Gpr171
Rplp0	2.12842e-148	0.362407	0.999	0.998	3.25839e-144	CD4 Trm	Rplp0
Ptprc	7.54646e-148	0.458435	0.987	0.962	1.15529e-143	CD4 Trm	Ptprc
Tesc	4.30973e-141	1.83632	0.342	0.106	6.59777e-137	CD4 Trm	Tesc
Evi2a	2.11376e-139	1.67691	0.375	0.135	3.23596e-135	CD4 Trm	Evi2a
P2rx7	5.23778e-133	1.61294	0.378	0.144	8.01852e-129	CD4 Trm	P2rx7
Apol7e	3.82434e-132	2.30581	0.269	0.059	5.85469e-128	CD4 Trm	Apol7e
Trbc2	2.10146e-131	0.531827	0.973	0.93	3.21712e-127	CD4 Trm	Trbc2
Cd40lg	2.42382e-131	1.13416	0.389	0.14	3.71063e-127	CD4 Trm	Cd40lg
Nr4a2	4.13385e-131	1.33096	0.502	0.267	6.32851e-127	CD4 Trm	Nr4a2
Dusp2	7.07784e-130	1.4638	0.486	0.256	1.08355e-125	CD4 Trm	Dusp2
Ubac2	2.01713e-129	1.48246	0.383	0.149	3.08802e-125	CD4 Trm	Ubac2
Ccr5	5.71102e-129	1.45955	0.412	0.175	8.743e-125	CD4 Trm	Ccr5
Tmsb4x	3.29694e-126	0.407851	1	1	5.04728e-122	CD4 Trm	Tmsb4x
Coro1a	6.9156e-125	0.552991	0.939	0.882	1.05871e-120	CD4 Trm	Coro1a
Bcl2l11	1.18494e-123	1.80226	0.337	0.119	1.81403e-119	CD4 Trm	Bcl2l11
Grap2	3.79087e-120	1.1546	0.466	0.23	5.80345e-116	CD4 Trm	Grap2
Slfn1	6.40387e-120	2.29156	0.254	0.058	9.80368e-116	CD4 Trm	Slfn1
Efhd2	5.38305e-119	1.29385	0.428	0.202	8.24091e-115	CD4 Trm	Efhd2
Sh3bgrl3	1.59375e-118	0.61119	0.856	0.735	2.43987e-114	CD4 Trm	Sh3bgrl3
Bcl2a1d	6.62242e-118	0.858585	0.634	0.393	1.01383e-113	CD4 Trm	Bcl2a1d
Selplg	8.29048e-115	0.668934	0.779	0.605	1.26919e-110	CD4 Trm	Selplg
Car2	3.10168e-113	2.36084	0.263	0.072	4.74836e-109	CD4 Trm	Car2
Dtx4	9.88012e-113	2.6224	0.215	0.038	1.51255e-108	CD4 Trm	Dtx4
Ikzf1	1.9337e-112	1.21917	0.422	0.2	2.9603e-108	CD4 Trm	Ikzf1
Arid5a	4.96598e-111	1.57219	0.328	0.122	7.60242e-107	CD4 Trm	Arid5a
B4galnt1	1.0938e-110	1.25551	0.418	0.201	1.67449e-106	CD4 Trm	B4galnt1
Rnf166	4.5861e-110	1.09762	0.472	0.251	7.02086e-106	CD4 Trm	Rnf166
Cd160	5.78232e-107	2.22252	0.252	0.069	8.85216e-103	CD4 Trm	Cd160
Gmfg	4.48774e-105	0.895125	0.564	0.35	6.87029e-101	CD4 Trm	Gmfg
Uba52	1.80903e-104	0.456043	0.956	0.895	2.76945e-100	CD4 Trm	Uba52
Evl	1.53779e-102	1.81843	0.27	0.084	2.35421e-98	CD4 Trm	Evl
Lsp1	5.71825e-102	0.76334	0.683	0.505	8.75406e-98	CD4 Trm	Lsp1
Nabp1	1.47495e-101	1.11044	0.497	0.294	2.25801e-97	CD4 Trm	Nabp1
Rsrp1	2.49091e-101	0.915359	0.566	0.361	3.81334e-97	CD4 Trm	Rsrp1
Rcbtb2	1.83676e-100	1.42742	0.343	0.144	2.81189e-96	CD4 Trm	Rcbtb2
Lck	1.02567e-98	0.587629	0.793	0.626	1.57019e-94	CD4 Trm	Lck
Cbx4	3.24472e-98	1.02594	0.468	0.259	4.96734e-94	CD4 Trm	Cbx4
Rpl18	1.04084e-97	0.331216	0.996	0.988	1.59342e-93	CD4 Trm	Rpl18
Pde4b	5.09001e-97	1.11427	0.41	0.203	7.7923e-93	CD4 Trm	Pde4b
Sp100	2.27161e-95	0.909405	0.514	0.309	3.47761e-91	CD4 Trm	Sp100
2025-09-01	2.97402e-95	0.604445	0.774	0.607	4.55293e-91	CD4 Trm	2025-09-01
Cir1	3.7659e-95	1.20201	0.407	0.209	5.76521e-91	CD4 Trm	Cir1
Crot	5.15021e-93	1.72765	0.268	0.092	7.88446e-89	CD4 Trm	Crot
Xcl1	3.89932e-92	3.32938	0.188	0.037	5.96947e-88	CD4 Trm	Xcl1
Rps16	3.22284e-91	0.267277	0.999	0.997	4.93385e-87	CD4 Trm	Rps16
Gimap7	4.41676e-91	0.743062	0.601	0.396	6.76162e-87	CD4 Trm	Gimap7
Pip4k2a	2.86517e-90	1.33157	0.326	0.14	4.38628e-86	CD4 Trm	Pip4k2a
Gimap9	3.08964e-90	1.01575	0.457	0.258	4.72994e-86	CD4 Trm	Gimap9
St3gal6	1.72952e-89	2.66985	0.173	0.029	2.64772e-85	CD4 Trm	St3gal6
Dennd2d	2.05137e-89	2.43677	0.19	0.04	3.14044e-85	CD4 Trm	Dennd2d
Cxcr6	8.54358e-89	1.03953	0.393	0.193	1.30794e-84	CD4 Trm	Cxcr6
Dapk2	9.2002e-89	3.04215	0.158	0.02	1.40846e-84	CD4 Trm	Dapk2
2025-09-06	3.93651e-88	0.904286	0.48	0.283	6.0264e-84	CD4 Trm	2025-09-06
Cfl1	1.77332e-85	0.41657	0.976	0.962	2.71477e-81	CD4 Trm	Cfl1
Stk17b	2.8382e-85	0.439856	0.93	0.85	4.345e-81	CD4 Trm	Stk17b
Clta	4.21074e-85	0.705659	0.632	0.448	6.44622e-81	CD4 Trm	Clta
Tbx21	1.92087e-83	2.52003	0.17	0.032	2.94067e-79	CD4 Trm	Tbx21
Epb41	3.86001e-83	1.14812	0.383	0.198	5.90928e-79	CD4 Trm	Epb41
Stk26	9.7243e-83	1.65355	0.237	0.077	1.48869e-78	CD4 Trm	Stk26
Mfsd6	1.80839e-82	1.89551	0.212	0.06	2.76847e-78	CD4 Trm	Mfsd6
H2afy	2.54317e-82	0.702474	0.634	0.464	3.89334e-78	CD4 Trm	H2afy
Mrpl9	1.33525e-81	1.09958	0.384	0.202	2.04413e-77	CD4 Trm	Mrpl9
Gzmb	1.60344e-80	1.27356	0.555	0.396	2.45471e-76	CD4 Trm	Gzmb
Slc3a2	7.75813e-80	0.534061	0.825	0.712	1.18769e-75	CD4 Trm	Slc3a2
Rpa2	1.2573e-79	2.16105	0.182	0.042	1.9248e-75	CD4 Trm	Rpa2
Smim3	1.36858e-79	2.25008	0.171	0.035	2.09516e-75	CD4 Trm	Smim3
Itga1	5.17307e-79	3.82489	0.128	0.01	7.91946e-75	CD4 Trm	Itga1
Supt4a	1.07894e-77	0.654887	0.633	0.462	1.65175e-73	CD4 Trm	Supt4a
Abcb1b	6.69992e-76	1.42199	0.235	0.081	1.02569e-71	CD4 Trm	Abcb1b
Lpxn	1.90199e-75	0.7926	0.525	0.347	2.91175e-71	CD4 Trm	Lpxn
Gimap3	2.47457e-74	0.431414	0.914	0.823	3.78832e-70	CD4 Trm	Gimap3
Arhgdib	1.04976e-72	0.452805	0.876	0.793	1.60708e-68	CD4 Trm	Arhgdib
Gpr18	6.03564e-72	2.72068	0.139	0.021	9.23996e-68	CD4 Trm	Gpr18
Psmb9	1.78661e-71	0.777609	0.486	0.307	2.73513e-67	CD4 Trm	Psmb9
Fam189b	8.83637e-71	0.968611	0.39	0.218	1.35276e-66	CD4 Trm	Fam189b
Serpinb9	2.66475e-70	1.56759	0.27	0.119	4.07946e-66	CD4 Trm	Serpinb9
Actn2	6.06136e-70	1.20673	0.286	0.128	9.27934e-66	CD4 Trm	Actn2
Tmem9b	4.20395e-69	0.992369	0.368	0.2	6.43582e-65	CD4 Trm	Tmem9b
Gnas	4.55038e-69	0.50998	0.773	0.643	6.96618e-65	CD4 Trm	Gnas
Psmb10	8.0404e-69	0.878646	0.419	0.247	1.2309e-64	CD4 Trm	Psmb10
Bin2	1.12648e-68	0.823055	0.45	0.276	1.72452e-64	CD4 Trm	Bin2
Actb	1.21641e-68	0.427127	0.995	0.992	1.8622e-64	CD4 Trm	Actb
Adgre5	6.55364e-68	0.992361	0.358	0.191	1.0033e-63	CD4 Trm	Adgre5
Prdx6	2.05222e-67	0.633653	0.596	0.422	3.14174e-63	CD4 Trm	Prdx6
Abi3	2.87378e-67	1.60109	0.211	0.074	4.39947e-63	CD4 Trm	Abi3
Mcl1	2.7081e-66	0.556743	0.693	0.542	4.14583e-62	CD4 Trm	Mcl1
Arpc5	7.14696e-66	0.63091	0.658	0.517	1.09413e-61	CD4 Trm	Arpc5
Cd3e	2.07254e-65	0.423789	0.856	0.762	3.17285e-61	CD4 Trm	Cd3e
Fau	2.82226e-65	0.227736	1	0.999	4.32059e-61	CD4 Trm	Fau
Me2	1.20086e-64	1.25666	0.286	0.136	1.8384e-60	CD4 Trm	Me2
Plcxd2	1.54057e-64	1.08907	0.308	0.152	2.35845e-60	CD4 Trm	Plcxd2
Ppp3cc	2.38951e-64	1.34297	0.249	0.105	3.6581e-60	CD4 Trm	Ppp3cc
Rnf138	3.94966e-64	0.794431	0.434	0.264	6.04654e-60	CD4 Trm	Rnf138
Ucp2	5.86467e-64	0.491932	0.753	0.61	8.97823e-60	CD4 Trm	Ucp2
Serbp1	1.09253e-63	0.477926	0.774	0.64	1.67256e-59	CD4 Trm	Serbp1
Rinl	2.47668e-63	0.82489	0.436	0.275	3.79155e-59	CD4 Trm	Rinl
Commd8	8.8657e-63	1.32508	0.248	0.107	1.35725e-58	CD4 Trm	Commd8
Ablim1	1.16182e-62	0.660451	0.554	0.388	1.77864e-58	CD4 Trm	Ablim1
Gpsm3	4.0868e-62	0.752961	0.461	0.299	6.25648e-58	CD4 Trm	Gpsm3
Zbp1	7.01553e-62	0.989803	0.346	0.189	1.07401e-57	CD4 Trm	Zbp1
Sorl1	9.0561e-62	1.212	0.247	0.106	1.3864e-57	CD4 Trm	Sorl1
Cox4i1	1.71828e-61	0.389045	0.897	0.831	2.63052e-57	CD4 Trm	Cox4i1
Litaf	2.49497e-61	1.08466	0.322	0.171	3.81955e-57	CD4 Trm	Litaf
Gm2682	1.91826e-60	2.48865	0.135	0.029	2.93667e-56	CD4 Trm	Gm2682
Sp110	2.86441e-60	0.860444	0.392	0.234	4.38512e-56	CD4 Trm	Sp110
Pik3cd	3.02878e-60	1.22118	0.248	0.109	4.63675e-56	CD4 Trm	Pik3cd
Emg1	2.81142e-59	0.675902	0.49	0.325	4.30401e-55	CD4 Trm	Emg1
Tgfbr2	1.49549e-58	0.943267	0.339	0.188	2.28945e-54	CD4 Trm	Tgfbr2
Ndufb1-ps	3.74348e-58	0.711667	0.492	0.332	5.73089e-54	CD4 Trm	Ndufb1-ps
Arhgap9	7.48842e-58	0.802752	0.387	0.23	1.1464e-53	CD4 Trm	Arhgap9
Ets1	7.61115e-58	0.380499	0.869	0.776	1.16519e-53	CD4 Trm	Ets1
Calhm6	2.3415e-57	2.8538	0.114	0.018	3.5846e-53	CD4 Trm	Calhm6
Ifi47	2.61206e-57	0.858031	0.353	0.2	3.99881e-53	CD4 Trm	Ifi47
AI506816	3.497e-57	1.27375	0.244	0.111	5.35356e-53	CD4 Trm	AI506816
Ostf1	6.25877e-56	0.704481	0.493	0.34	9.58156e-52	CD4 Trm	Ostf1
Rpsa	7.18765e-56	0.238489	0.994	0.982	1.10036e-51	CD4 Trm	Rpsa
Dcp1b	1.50158e-55	2.38491	0.139	0.036	2.29877e-51	CD4 Trm	Dcp1b
Serpina3g	6.68247e-55	1.4916	0.191	0.072	1.02302e-50	CD4 Trm	Serpina3g
Cd4	6.82023e-55	0.550363	0.638	0.502	1.04411e-50	CD4 Trm	Cd4
Pik3r5	7.63843e-55	1.43851	0.196	0.075	1.16937e-50	CD4 Trm	Pik3r5
Gnptab	1.25727e-54	2.1	0.139	0.036	1.92475e-50	CD4 Trm	Gnptab
Ifi208	4.74706e-54	2.21225	0.132	0.033	7.26727e-50	CD4 Trm	Ifi208
Ppp1ca	5.13292e-54	0.477038	0.735	0.622	7.85799e-50	CD4 Trm	Ppp1ca
Cd7	9.09921e-54	2.91656	0.12	0.026	1.393e-49	CD4 Trm	Cd7
Arpc2	1.34328e-53	0.335757	0.923	0.888	2.05643e-49	CD4 Trm	Arpc2
Rpl27	1.4384e-53	0.21188	0.998	0.996	2.20205e-49	CD4 Trm	Rpl27
Cd226	3.82663e-53	1.16564	0.247	0.117	5.85818e-49	CD4 Trm	Cd226
Rps10	4.7984e-53	0.269915	0.969	0.923	7.34587e-49	CD4 Trm	Rps10
Sntb2	8.28901e-53	1.82349	0.148	0.044	1.26896e-48	CD4 Trm	Sntb2
Gramd1a	8.8752e-53	0.802249	0.385	0.239	1.3587e-48	CD4 Trm	Gramd1a
Trat1	1.4854e-52	1.32407	0.206	0.086	2.274e-48	CD4 Trm	Trat1
Tbc1d10c	2.50444e-52	0.824651	0.373	0.228	3.83405e-48	CD4 Trm	Tbc1d10c
Gbp4	2.70163e-52	0.974527	0.313	0.174	4.13592e-48	CD4 Trm	Gbp4
Slc25a5	6.56659e-52	0.402534	0.787	0.674	1.00528e-47	CD4 Trm	Slc25a5
Twf2	6.97329e-52	1.06407	0.275	0.142	1.06754e-47	CD4 Trm	Twf2
Acoxl	7.4238e-52	2.01309	0.136	0.037	1.13651e-47	CD4 Trm	Acoxl
Nab1	8.40152e-52	0.740312	0.44	0.292	1.28619e-47	CD4 Trm	Nab1
Cox7a2l	9.80483e-52	0.487993	0.679	0.543	1.50102e-47	CD4 Trm	Cox7a2l
Sh2d1a	1.40685e-51	0.716177	0.394	0.244	2.15375e-47	CD4 Trm	Sh2d1a
Fyn	2.27281e-51	0.463077	0.707	0.576	3.47944e-47	CD4 Trm	Fyn
D8Ertd738e	3.52022e-51	0.607563	0.547	0.402	5.3891e-47	CD4 Trm	D8Ertd738e
Cd48	5.97828e-51	0.645579	0.501	0.353	9.15216e-47	CD4 Trm	Cd48
Rassf5	8.18855e-51	0.828115	0.345	0.203	1.25358e-46	CD4 Trm	Rassf5
Ctsa	8.44462e-51	0.834042	0.364	0.222	1.29279e-46	CD4 Trm	Ctsa
Fam241a	1.00927e-50	1.74106	0.158	0.053	1.54509e-46	CD4 Trm	Fam241a
Rundc3b	1.21434e-50	1.30719	0.209	0.09	1.85903e-46	CD4 Trm	Rundc3b
Casp1	2.73928e-50	1.43683	0.19	0.077	4.19357e-46	CD4 Trm	Casp1
Pabpc1	1.18047e-49	0.241155	0.99	0.986	1.80719e-45	CD4 Trm	Pabpc1
Ctsd	1.34342e-49	0.794865	0.366	0.224	2.05665e-45	CD4 Trm	Ctsd
Arhgap45	2.20701e-49	0.523439	0.599	0.458	3.37871e-45	CD4 Trm	Arhgap45
St8sia4	2.81261e-49	0.828943	0.362	0.223	4.30583e-45	CD4 Trm	St8sia4
Thada	3.80114e-49	1.17843	0.218	0.099	5.81916e-45	CD4 Trm	Thada
Ptger4	4.879e-49	1.06367	0.262	0.135	7.46927e-45	CD4 Trm	Ptger4
Jaml	8.42917e-49	2.96749	0.096	0.014	1.29042e-44	CD4 Trm	Jaml
Prrt1	1.75763e-48	1.28505	0.197	0.084	2.69075e-44	CD4 Trm	Prrt1
Zap70	2.51936e-48	0.557252	0.541	0.396	3.85689e-44	CD4 Trm	Zap70
Ptpn6	3.19147e-48	1.15246	0.228	0.108	4.88582e-44	CD4 Trm	Ptpn6
Tpst2	3.49004e-48	0.62476	0.471	0.323	5.3429e-44	CD4 Trm	Tpst2
Prkacb	6.8259e-48	0.864532	0.317	0.183	1.04498e-43	CD4 Trm	Prkacb
Anxa2	2.47545e-47	1.72441	0.148	0.049	3.78966e-43	CD4 Trm	Anxa2
Bcl2a1b	2.84431e-47	0.428478	0.788	0.667	4.35436e-43	CD4 Trm	Bcl2a1b
Smap1	3.90444e-47	0.663837	0.452	0.31	5.97731e-43	CD4 Trm	Smap1
Cd3g	5.43175e-47	0.393341	0.792	0.683	8.31546e-43	CD4 Trm	Cd3g
Trip4	5.69708e-47	1.48049	0.168	0.064	8.72166e-43	CD4 Trm	Trip4
B4galnt4	2.19111e-46	1.52823	0.154	0.054	3.35437e-42	CD4 Trm	B4galnt4
Itgb2	2.44438e-46	0.696654	0.401	0.26	3.7421e-42	CD4 Trm	Itgb2
Gngt2	3.36638e-46	1.00159	0.25	0.128	5.15359e-42	CD4 Trm	Gngt2
Tmem140	3.68537e-46	1.70522	0.144	0.048	5.64193e-42	CD4 Trm	Tmem140
Rpl4	8.43912e-46	0.227872	0.98	0.963	1.29195e-41	CD4 Trm	Rpl4
Dnajc3	1.11294e-45	0.757582	0.355	0.22	1.70379e-41	CD4 Trm	Dnajc3
Rab8a	4.71604e-45	0.692856	0.411	0.277	7.21979e-41	CD4 Trm	Rab8a
Ly6a	1.63019e-44	0.484984	0.443	0.288	2.49565e-40	CD4 Trm	Ly6a
Pitpnc1	2.00512e-44	0.779183	0.336	0.204	3.06965e-40	CD4 Trm	Pitpnc1
Ubc	2.54244e-44	0.202152	0.994	0.993	3.89223e-40	CD4 Trm	Ubc
Arpc1b	4.16571e-44	0.398188	0.748	0.644	6.37728e-40	CD4 Trm	Arpc1b
Mbp	4.49019e-44	0.931388	0.273	0.151	6.87404e-40	CD4 Trm	Mbp
Gm20069	5.77189e-44	1.50973	0.148	0.052	8.83619e-40	CD4 Trm	Gm20069
Itgal	1.18744e-43	0.786721	0.333	0.202	1.81785e-39	CD4 Trm	Itgal
Tprgl	1.3919e-43	0.733707	0.37	0.238	2.13086e-39	CD4 Trm	Tprgl
Ppm1m	2.29926e-43	1.20716	0.193	0.087	3.51993e-39	CD4 Trm	Ppm1m
Lilr4b	2.44289e-43	0.646539	0.524	0.39	3.73981e-39	CD4 Trm	Lilr4b
Scml4	4.53487e-43	1.37194	0.161	0.063	6.94243e-39	CD4 Trm	Scml4
Ccl4	4.60163e-43	2.4438	0.127	0.04	7.04464e-39	CD4 Trm	Ccl4
Rpl28	5.40673e-43	0.287813	0.913	0.855	8.27716e-39	CD4 Trm	Rpl28
Atp5h	5.64135e-43	0.434108	0.655	0.528	8.63634e-39	CD4 Trm	Atp5h
Raf1	8.15553e-43	0.735823	0.391	0.259	1.24853e-38	CD4 Trm	Raf1
Ezh2	1.19919e-42	1.07453	0.224	0.112	1.83584e-38	CD4 Trm	Ezh2
Eef2	1.51855e-42	0.246274	0.967	0.943	2.32475e-38	CD4 Trm	Eef2
Baiap3	1.54937e-42	2.07198	0.11	0.029	2.37194e-38	CD4 Trm	Baiap3
Prf1	1.64719e-42	2.2864	0.098	0.021	2.52169e-38	CD4 Trm	Prf1
Rpl17	2.66625e-42	0.172488	0.999	1	4.08177e-38	CD4 Trm	Rpl17
Got1	3.23439e-42	0.427595	0.613	0.47	4.95153e-38	CD4 Trm	Got1
Cd3d	3.24534e-42	0.363155	0.787	0.685	4.96828e-38	CD4 Trm	Cd3d
Cd96	4.30278e-42	0.670585	0.369	0.236	6.58713e-38	CD4 Trm	Cd96
Tsc22d4	5.61266e-42	0.701757	0.366	0.237	8.59242e-38	CD4 Trm	Tsc22d4
Apbb1ip	8.18932e-42	0.561358	0.507	0.374	1.2537e-37	CD4 Trm	Apbb1ip
Ifi213	1.68136e-41	1.13008	0.204	0.097	2.57399e-37	CD4 Trm	Ifi213
Sipa1	1.70983e-41	0.901359	0.27	0.153	2.61757e-37	CD4 Trm	Sipa1
Lcp1	1.74349e-41	0.339922	0.854	0.771	2.66911e-37	CD4 Trm	Lcp1
Stat1	2.10952e-41	0.612853	0.455	0.32	3.22946e-37	CD4 Trm	Stat1
Ifi206	3.04215e-41	1.12115	0.215	0.107	4.65723e-37	CD4 Trm	Ifi206
Gcnt2	3.04748e-41	1.71168	0.123	0.038	4.66539e-37	CD4 Trm	Gcnt2
Sh2d3c	4.04526e-41	1.87116	0.109	0.029	6.19289e-37	CD4 Trm	Sh2d3c
Ehd3	5.41468e-41	1.88917	0.114	0.033	8.28933e-37	CD4 Trm	Ehd3
Ncf1	5.60217e-41	3.17078	0.074	0.008	8.57637e-37	CD4 Trm	Ncf1
Tmem131l	5.88019e-41	1.53337	0.141	0.051	9.00199e-37	CD4 Trm	Tmem131l
Susd3	8.94262e-41	0.93832	0.242	0.128	1.36903e-36	CD4 Trm	Susd3
Ptpn18	9.70889e-41	0.414555	0.712	0.598	1.48633e-36	CD4 Trm	Ptpn18
Fam78a	1.39135e-40	2.19197	0.097	0.022	2.13002e-36	CD4 Trm	Fam78a
Txnip	1.40275e-40	0.772565	0.296	0.173	2.14747e-36	CD4 Trm	Txnip
Rpl29	3.96758e-40	0.24977	0.963	0.935	6.07397e-36	CD4 Trm	Rpl29
Psmb1	4.85605e-40	0.419346	0.669	0.554	7.43413e-36	CD4 Trm	Psmb1
Arrb2	8.72109e-40	0.592847	0.419	0.286	1.33511e-35	CD4 Trm	Arrb2
Psmb8	8.84078e-40	0.452866	0.605	0.474	1.35343e-35	CD4 Trm	Psmb8
Gabarapl2	8.85761e-40	0.516427	0.55	0.422	1.35601e-35	CD4 Trm	Gabarapl2
Pstpip1	1.01382e-39	0.841243	0.279	0.162	1.55206e-35	CD4 Trm	Pstpip1
Lax1	2.41478e-39	1.55687	0.14	0.052	3.69679e-35	CD4 Trm	Lax1
Il16	2.5189e-39	0.961375	0.229	0.12	3.85618e-35	CD4 Trm	Il16
Tnfaip8	3.699e-39	0.431074	0.508	0.368	5.66279e-35	CD4 Trm	Tnfaip8
Stat4	4.24649e-39	0.585864	0.493	0.362	6.50094e-35	CD4 Trm	Stat4
Pfkp	4.43933e-39	0.783481	0.314	0.195	6.79617e-35	CD4 Trm	Pfkp
Dbf4	6.73548e-39	1.13487	0.208	0.105	1.03113e-34	CD4 Trm	Dbf4
Ifi203	1.05449e-38	0.543051	0.507	0.378	1.61432e-34	CD4 Trm	Ifi203
Mrps16	1.19193e-38	0.829025	0.287	0.171	1.82473e-34	CD4 Trm	Mrps16
Chst12	1.61172e-38	1.71877	0.121	0.04	2.46739e-34	CD4 Trm	Chst12
Btg2	1.68461e-38	0.54136	0.613	0.497	2.57897e-34	CD4 Trm	Btg2
5430416N02Rik	1.80912e-38	1.03575	0.251	0.143	2.76958e-34	CD4 Trm	5430416N02Rik
Med10	3.7444e-38	0.754035	0.324	0.206	5.7323e-34	CD4 Trm	Med10
St8sia1	3.97722e-38	2.26677	0.082	0.015	6.08873e-34	CD4 Trm	St8sia1
Sytl3	5.15999e-38	0.911005	0.265	0.153	7.89943e-34	CD4 Trm	Sytl3
Actg1	5.19243e-38	0.292163	0.996	0.989	7.94909e-34	CD4 Trm	Actg1
Phf6	6.25087e-38	0.708082	0.337	0.215	9.56946e-34	CD4 Trm	Phf6
Riok1	1.26892e-37	0.73991	0.346	0.227	1.94259e-33	CD4 Trm	Riok1
Sugt1	1.34491e-37	0.758877	0.315	0.198	2.05892e-33	CD4 Trm	Sugt1
Prex1	1.57271e-37	0.719386	0.323	0.204	2.40767e-33	CD4 Trm	Prex1
Sash3	1.60237e-37	0.926732	0.252	0.144	2.45306e-33	CD4 Trm	Sash3
S1pr4	1.64494e-37	1.4295	0.144	0.057	2.51824e-33	CD4 Trm	S1pr4
Rab19	1.74537e-37	1.10829	0.196	0.097	2.67199e-33	CD4 Trm	Rab19
Osgin1	2.28587e-37	1.15154	0.19	0.093	3.49944e-33	CD4 Trm	Osgin1
Actr3	3.93329e-37	0.28276	0.898	0.854	6.02147e-33	CD4 Trm	Actr3
Rpl19	7.38116e-37	0.177835	0.998	0.997	1.12998e-32	CD4 Trm	Rpl19
Smchd1	9.06235e-37	0.582187	0.427	0.302	1.38736e-32	CD4 Trm	Smchd1
Zswim6	1.01961e-36	0.883156	0.259	0.15	1.56093e-32	CD4 Trm	Zswim6
Capza1	1.14022e-36	0.44832	0.595	0.48	1.74557e-32	CD4 Trm	Capza1
B2m	1.37492e-36	0.141065	1	1	2.10486e-32	CD4 Trm	B2m
Usp48	2.18975e-36	1.01418	0.209	0.108	3.35229e-32	CD4 Trm	Usp48
Elmsan1	2.58173e-36	1.09947	0.182	0.087	3.95237e-32	CD4 Trm	Elmsan1
Psme1	2.74116e-36	0.383717	0.654	0.535	4.19644e-32	CD4 Trm	Psme1
Gm15472	3.97574e-36	1.87043	0.105	0.032	6.08646e-32	CD4 Trm	Gm15472
Ppm1h	5.12004e-36	0.890144	0.242	0.136	7.83827e-32	CD4 Trm	Ppm1h
Fyb	7.1251e-36	0.34738	0.742	0.642	1.09078e-31	CD4 Trm	Fyb
Gm30054	8.63575e-36	1.62599	0.114	0.038	1.32205e-31	CD4 Trm	Gm30054
Dop1b	1.22881e-35	1.51295	0.13	0.049	1.88118e-31	CD4 Trm	Dop1b
Arap2	1.4059e-35	0.587366	0.395	0.27	2.15229e-31	CD4 Trm	Arap2
Podnl1	1.45902e-35	0.775843	0.265	0.155	2.23361e-31	CD4 Trm	Podnl1
Rtp4	1.46348e-35	1.20642	0.179	0.087	2.24045e-31	CD4 Trm	Rtp4
Hvcn1	1.71552e-35	1.30363	0.149	0.063	2.62628e-31	CD4 Trm	Hvcn1
Apol7b	1.73827e-35	2.08019	0.086	0.019	2.66112e-31	CD4 Trm	Apol7b
Galnt10	1.76384e-35	1.53039	0.125	0.046	2.70027e-31	CD4 Trm	Galnt10
Plek	1.93167e-35	0.946015	0.167	0.075	2.95719e-31	CD4 Trm	Plek
Lrrfip1	2.05113e-35	0.610477	0.425	0.306	3.14008e-31	CD4 Trm	Lrrfip1
Ifi214	2.25561e-35	1.66364	0.121	0.044	3.45312e-31	CD4 Trm	Ifi214
Actr2	2.35919e-35	0.455573	0.558	0.432	3.61168e-31	CD4 Trm	Actr2
Il12rb1	3.07034e-35	0.878531	0.222	0.12	4.70039e-31	CD4 Trm	Il12rb1
Tgtp2	4.88654e-35	0.936398	0.211	0.111	7.4808e-31	CD4 Trm	Tgtp2
Rpl12	5.92031e-35	0.213835	0.976	0.953	9.0634e-31	CD4 Trm	Rpl12
Abcb1a	7.94691e-35	0.470958	0.552	0.435	1.21659e-30	CD4 Trm	Abcb1a
Capzb	9.94926e-35	0.376605	0.706	0.61	1.52313e-30	CD4 Trm	Capzb
Lgals3	1.08019e-34	2.31973	0.096	0.027	1.65366e-30	CD4 Trm	Lgals3
Cd47	1.28652e-34	0.443091	0.558	0.434	1.96953e-30	CD4 Trm	Cd47
Fam204a	1.65234e-34	0.904365	0.225	0.124	2.52957e-30	CD4 Trm	Fam204a
4930503L19Rik	1.95262e-34	0.567829	0.418	0.297	2.98927e-30	CD4 Trm	4930503L19Rik
Tmem71	2.12854e-34	0.972138	0.185	0.091	3.25858e-30	CD4 Trm	Tmem71
Tmem234	2.23897e-34	0.476595	0.508	0.385	3.42764e-30	CD4 Trm	Tmem234
Evi2	2.38817e-34	1.98844	0.087	0.021	3.65605e-30	CD4 Trm	Evi2
Tapbpl	2.48939e-34	0.711983	0.304	0.192	3.811e-30	CD4 Trm	Tapbpl
Psma5	2.53207e-34	0.641508	0.357	0.242	3.87634e-30	CD4 Trm	Psma5
Rps13	2.78982e-34	0.180647	0.994	0.992	4.27094e-30	CD4 Trm	Rps13
Sh3kbp1	3.13002e-34	0.407299	0.583	0.461	4.79175e-30	CD4 Trm	Sh3kbp1
Scand1	3.76013e-34	0.458909	0.536	0.418	5.75639e-30	CD4 Trm	Scand1
Acadl	4.00003e-34	0.780807	0.323	0.213	6.12365e-30	CD4 Trm	Acadl
Gng2	4.04217e-34	0.712928	0.314	0.202	6.18816e-30	CD4 Trm	Gng2
Rpl32	4.58395e-34	0.15898	0.999	0.997	7.01757e-30	CD4 Trm	Rpl32
Arpc4	4.88087e-34	0.557891	0.46	0.346	7.47212e-30	CD4 Trm	Arpc4
Cox8a	6.56681e-34	0.303585	0.806	0.717	1.00531e-29	CD4 Trm	Cox8a
Rnf114	7.50946e-34	0.671727	0.322	0.208	1.14962e-29	CD4 Trm	Rnf114
Eif2ak3	7.89499e-34	1.56217	0.109	0.037	1.20864e-29	CD4 Trm	Eif2ak3
Atp5md	2.03897e-33	0.370973	0.709	0.601	3.12146e-29	CD4 Trm	Atp5md
Serf2	2.14435e-33	0.304805	0.825	0.746	3.28279e-29	CD4 Trm	Serf2
Igf2r	3.54865e-33	0.923617	0.189	0.096	5.43263e-29	CD4 Trm	Igf2r
Rab35	4.35508e-33	0.783523	0.26	0.155	6.66719e-29	CD4 Trm	Rab35
Sp4	5.33009e-33	0.884293	0.226	0.128	8.15984e-29	CD4 Trm	Sp4
Mirt1	5.71319e-33	1.76127	0.096	0.029	8.74633e-29	CD4 Trm	Mirt1
Fam49a	5.80551e-33	1.9428	0.089	0.024	8.88766e-29	CD4 Trm	Fam49a
Atp5c1	8.58404e-33	0.417613	0.599	0.493	1.31413e-28	CD4 Trm	Atp5c1
Rasal3	9.83097e-33	0.688425	0.326	0.215	1.50502e-28	CD4 Trm	Rasal3
Cipc	9.83508e-33	1.12046	0.159	0.073	1.50565e-28	CD4 Trm	Cipc
Cdc42	1.13464e-32	0.313243	0.791	0.713	1.73702e-28	CD4 Trm	Cdc42
Skap1	1.46214e-32	0.399689	0.628	0.518	2.2384e-28	CD4 Trm	Skap1
Oas3	1.68151e-32	1.96168	0.088	0.024	2.57423e-28	CD4 Trm	Oas3
Adam19	1.89237e-32	0.871951	0.245	0.145	2.89702e-28	CD4 Trm	Adam19
H2-T22	1.97565e-32	0.509869	0.436	0.318	3.02453e-28	CD4 Trm	H2-T22
Cib1	2.13465e-32	0.887445	0.228	0.13	3.26793e-28	CD4 Trm	Cib1
Nlk	3.64264e-32	0.993688	0.195	0.103	5.57652e-28	CD4 Trm	Nlk
Uqcrh	3.96996e-32	0.320799	0.733	0.629	6.07762e-28	CD4 Trm	Uqcrh
Cd28	8.08751e-32	0.351528	0.613	0.485	1.23812e-27	CD4 Trm	Cd28
Aak1	1.0497e-31	0.80417	0.25	0.15	1.60699e-27	CD4 Trm	Aak1
Myo1f	1.05233e-31	0.909763	0.205	0.112	1.61101e-27	CD4 Trm	Myo1f
Ociad1	1.18853e-31	0.452129	0.548	0.437	1.81952e-27	CD4 Trm	Ociad1
B3galt5	1.31161e-31	1.93367	0.086	0.023	2.00794e-27	CD4 Trm	B3galt5
Emp1	1.63009e-31	1.31638	0.126	0.051	2.49551e-27	CD4 Trm	Emp1
Fryl	1.88103e-31	0.55058	0.444	0.331	2.87967e-27	CD4 Trm	Fryl
Nfatc1	2.52958e-31	0.409791	0.546	0.423	3.87253e-27	CD4 Trm	Nfatc1
Ankrd44	2.70031e-31	0.630666	0.34	0.23	4.13391e-27	CD4 Trm	Ankrd44
Klrb1c	3.54425e-31	2.89026	0.068	0.013	5.42589e-27	CD4 Trm	Klrb1c
Prkcq	3.72191e-31	0.761505	0.25	0.15	5.69788e-27	CD4 Trm	Prkcq
Tle5	4.47122e-31	0.381283	0.631	0.524	6.84499e-27	CD4 Trm	Tle5
Myl6	5.2814e-31	0.278018	0.878	0.811	8.0853e-27	CD4 Trm	Myl6
Dap	5.98688e-31	0.979425	0.198	0.108	9.16531e-27	CD4 Trm	Dap
Casp3	6.30316e-31	0.756795	0.274	0.171	9.64951e-27	CD4 Trm	Casp3
Trafd1	6.517e-31	0.947908	0.204	0.113	9.97688e-27	CD4 Trm	Trafd1
AI662270	1.19677e-30	0.538377	0.38	0.266	1.83214e-26	CD4 Trm	AI662270
Sub1	1.60029e-30	0.198456	0.93	0.891	2.44989e-26	CD4 Trm	Sub1
Pycard	1.93113e-30	0.661055	0.355	0.249	2.95637e-26	CD4 Trm	Pycard
Nlrc5	2.0416e-30	0.852639	0.214	0.121	3.12549e-26	CD4 Trm	Nlrc5
9930111J21Rik2	2.45233e-30	0.986743	0.189	0.101	3.75427e-26	CD4 Trm	9930111J21Rik2
Tspan14	2.57494e-30	1.15821	0.148	0.069	3.94197e-26	CD4 Trm	Tspan14
Os9	2.60999e-30	0.5373	0.397	0.283	3.99564e-26	CD4 Trm	Os9
Was	2.63059e-30	0.534398	0.383	0.27	4.02718e-26	CD4 Trm	Was
Gbp9	2.87011e-30	0.801806	0.236	0.14	4.39385e-26	CD4 Trm	Gbp9
Clec2d	2.87864e-30	0.913009	0.202	0.111	4.40691e-26	CD4 Trm	Clec2d
Mndal	2.98468e-30	0.403589	0.644	0.536	4.56924e-26	CD4 Trm	Mndal
Dnajb6	3.61429e-30	0.354387	0.64	0.518	5.53311e-26	CD4 Trm	Dnajb6
Cox5b	3.98407e-30	0.436222	0.566	0.459	6.09921e-26	CD4 Trm	Cox5b
Lcp2	5.41134e-30	0.349558	0.654	0.543	8.28422e-26	CD4 Trm	Lcp2
Def6	5.88606e-30	0.698408	0.264	0.164	9.01096e-26	CD4 Trm	Def6
Ier2	6.07849e-30	0.472198	0.517	0.402	9.30556e-26	CD4 Trm	Ier2
Itgb1	6.50007e-30	1.17775	0.144	0.066	9.95096e-26	CD4 Trm	Itgb1
Klrd1	7.51128e-30	4.67575	0.049	0.004	1.1499e-25	CD4 Trm	Klrd1
Cnp	9.26864e-30	0.842948	0.227	0.134	1.41894e-25	CD4 Trm	Cnp
Mctp2	1.44915e-29	2.21661	0.067	0.013	2.21851e-25	CD4 Trm	Mctp2
Chsy1	1.65825e-29	2.42693	0.064	0.012	2.53862e-25	CD4 Trm	Chsy1
Btbd11	1.66055e-29	1.63986	0.095	0.031	2.54213e-25	CD4 Trm	Btbd11
Pik3ap1	1.77146e-29	1.60577	0.096	0.033	2.71192e-25	CD4 Trm	Pik3ap1
Rasgrp2	2.25109e-29	1.12161	0.154	0.074	3.44619e-25	CD4 Trm	Rasgrp2
Ugcg	3.34795e-29	0.923412	0.184	0.099	5.12538e-25	CD4 Trm	Ugcg
Rpl8	4.24659e-29	0.193639	0.961	0.932	6.50111e-25	CD4 Trm	Rpl8
Tor1aip1	4.35635e-29	0.515922	0.442	0.335	6.66913e-25	CD4 Trm	Tor1aip1
Traf3ip3	4.77376e-29	0.708098	0.248	0.151	7.30814e-25	CD4 Trm	Traf3ip3
Lyst	5.47521e-29	1.63448	0.104	0.039	8.382e-25	CD4 Trm	Lyst
Stk4	5.86149e-29	0.347518	0.615	0.502	8.97335e-25	CD4 Trm	Stk4
Rpl23a	5.91282e-29	0.155006	0.996	0.992	9.05194e-25	CD4 Trm	Rpl23a
mt-Co1	6.37564e-29	0.127964	1	1	9.76047e-25	CD4 Trm	mt-Co1
Sesn3	6.84754e-29	0.696045	0.26	0.161	1.04829e-24	CD4 Trm	Sesn3
Vcpkmt	8.3635e-29	0.655995	0.301	0.2	1.28037e-24	CD4 Trm	Vcpkmt
Arhgap10	8.98252e-29	0.981009	0.176	0.093	1.37513e-24	CD4 Trm	Arhgap10
Ddx58	1.10865e-28	0.846249	0.208	0.119	1.69723e-24	CD4 Trm	Ddx58
Chic2	1.36186e-28	0.47627	0.428	0.318	2.08488e-24	CD4 Trm	Chic2
Syne2	1.56552e-28	2.10185	0.068	0.015	2.39665e-24	CD4 Trm	Syne2
Arhgap30	1.87039e-28	0.556181	0.348	0.241	2.86339e-24	CD4 Trm	Arhgap30
Ppp1cc	2.12885e-28	0.363567	0.61	0.504	3.25906e-24	CD4 Trm	Ppp1cc
Grk6	2.26269e-28	0.513834	0.397	0.29	3.46395e-24	CD4 Trm	Grk6
Armc7	2.57206e-28	1.2179	0.127	0.056	3.93756e-24	CD4 Trm	Armc7
Ddx28	2.58318e-28	1.38049	0.115	0.047	3.9546e-24	CD4 Trm	Ddx28
Mrpl18	2.94697e-28	0.82306	0.218	0.128	4.51152e-24	CD4 Trm	Mrpl18
Rps25	3.19708e-28	0.215656	0.916	0.867	4.8944e-24	CD4 Trm	Rps25
Rpl35a	5.54899e-28	0.206092	0.958	0.93	8.49495e-24	CD4 Trm	Rpl35a
Gm29243	5.61531e-28	2.7108	0.058	0.01	8.59647e-24	CD4 Trm	Gm29243
Nod1	5.86113e-28	3.92443	0.045	0.003	8.9728e-24	CD4 Trm	Nod1
Snx20	6.33889e-28	0.682152	0.272	0.176	9.7042e-24	CD4 Trm	Snx20
Trbc1	6.9682e-28	0.54826	0.547	0.457	1.06676e-23	CD4 Trm	Trbc1
Smc3	7.52258e-28	0.694948	0.297	0.199	1.15163e-23	CD4 Trm	Smc3
Arhgef3	9.21326e-28	0.522904	0.326	0.219	1.41046e-23	CD4 Trm	Arhgef3
Rpl36al	9.66709e-28	0.341008	0.62	0.509	1.47993e-23	CD4 Trm	Rpl36al
Sp140	1.10537e-27	0.897504	0.182	0.099	1.69221e-23	CD4 Trm	Sp140
Unc119b	1.11286e-27	1.27814	0.117	0.049	1.70367e-23	CD4 Trm	Unc119b
Rnf167	1.17898e-27	0.76471	0.242	0.151	1.8049e-23	CD4 Trm	Rnf167
Tmem154	1.31465e-27	0.576745	0.355	0.251	2.0126e-23	CD4 Trm	Tmem154
Ppp1r18	1.57091e-27	0.397235	0.569	0.47	2.4049e-23	CD4 Trm	Ppp1r18
Gm12216	1.6319e-27	1.32593	0.109	0.044	2.49827e-23	CD4 Trm	Gm12216
Atp6v0a2	2.34184e-27	0.936812	0.172	0.092	3.58512e-23	CD4 Trm	Atp6v0a2
Actn1	2.36006e-27	1.67362	0.086	0.028	3.61302e-23	CD4 Trm	Actn1
Cyld	3.24933e-27	0.472887	0.416	0.307	4.9744e-23	CD4 Trm	Cyld
Trim12a	3.52168e-27	0.833002	0.216	0.129	5.39133e-23	CD4 Trm	Trim12a
Limd2	5.22093e-27	0.34081	0.699	0.61	7.99273e-23	CD4 Trm	Limd2
Gm14029	5.33205e-27	2.31145	0.059	0.011	8.16283e-23	CD4 Trm	Gm14029
Baiap2	6.13237e-27	1.16023	0.131	0.06	9.38804e-23	CD4 Trm	Baiap2
Cnn2	8.33978e-27	0.421307	0.582	0.485	1.27674e-22	CD4 Trm	Cnn2
Slc35e1	1.6342e-26	1.08653	0.138	0.066	2.5018e-22	CD4 Trm	Slc35e1
Mta3	1.71594e-26	0.566394	0.314	0.214	2.62693e-22	CD4 Trm	Mta3
Ubl5	1.97218e-26	0.325382	0.664	0.563	3.01921e-22	CD4 Trm	Ubl5
Mrpl57	2.10766e-26	0.740777	0.23	0.142	3.22662e-22	CD4 Trm	Mrpl57
Sla2	2.39796e-26	0.873364	0.173	0.094	3.67103e-22	CD4 Trm	Sla2
Kmt2e	2.40569e-26	0.401532	0.533	0.429	3.68288e-22	CD4 Trm	Kmt2e
Ddx46	2.6681e-26	0.451057	0.413	0.306	4.0846e-22	CD4 Trm	Ddx46
Myo6	2.68035e-26	1.65799	0.082	0.027	4.10335e-22	CD4 Trm	Myo6
Tgtp1	3.15011e-26	1.34118	0.105	0.042	4.82251e-22	CD4 Trm	Tgtp1
Pdcd2	3.49145e-26	0.951437	0.17	0.092	5.34506e-22	CD4 Trm	Pdcd2
Pfn1	3.69864e-26	0.20028	0.974	0.966	5.66225e-22	CD4 Trm	Pfn1
Cox5a	3.75658e-26	0.394613	0.542	0.435	5.75095e-22	CD4 Trm	Cox5a
Ogt	3.85797e-26	0.687751	0.242	0.151	5.90616e-22	CD4 Trm	Ogt
Nsmaf	4.69827e-26	0.605646	0.321	0.224	7.19257e-22	CD4 Trm	Nsmaf
Usp38	4.90102e-26	0.608086	0.286	0.19	7.50297e-22	CD4 Trm	Usp38
Xrn1	6.63852e-26	0.737286	0.236	0.148	1.01629e-21	CD4 Trm	Xrn1
Rpl31	6.71704e-26	0.213533	0.926	0.889	1.02831e-21	CD4 Trm	Rpl31
Rps8	7.11447e-26	0.161864	0.978	0.962	1.08915e-21	CD4 Trm	Rps8
Heatr9	7.39296e-26	3.97947	0.042	0.003	1.13179e-21	CD4 Trm	Heatr9
Hnrnpa3	7.89308e-26	0.258339	0.852	0.789	1.20835e-21	CD4 Trm	Hnrnpa3
Tnfrsf1a	1.0295e-25	1.57106	0.093	0.035	1.57606e-21	CD4 Trm	Tnfrsf1a
Dtx3l	1.2888e-25	0.882164	0.167	0.09	1.97302e-21	CD4 Trm	Dtx3l
H2afj	1.40984e-25	0.547987	0.321	0.223	2.15832e-21	CD4 Trm	H2afj
Cotl1	1.98644e-25	0.321728	0.7	0.61	3.04104e-21	CD4 Trm	Cotl1
Xaf1	2.09314e-25	0.927524	0.173	0.096	3.20438e-21	CD4 Trm	Xaf1
Slamf6	2.12486e-25	0.69739	0.253	0.164	3.25295e-21	CD4 Trm	Slamf6
Fam234b	2.4364e-25	1.90857	0.069	0.019	3.72988e-21	CD4 Trm	Fam234b
Rnf14	3.40756e-25	0.935144	0.164	0.089	5.21664e-21	CD4 Trm	Rnf14
Itk	4.02754e-25	0.279495	0.677	0.573	6.16576e-21	CD4 Trm	Itk
Irf9	4.8278e-25	0.732947	0.236	0.149	7.39089e-21	CD4 Trm	Irf9
Slc9a9	5.45809e-25	0.931976	0.172	0.095	8.35579e-21	CD4 Trm	Slc9a9
Ifi27l2a	5.84087e-25	0.42101	0.69	0.622	8.94179e-21	CD4 Trm	Ifi27l2a
Mns1	5.93918e-25	1.64367	0.082	0.028	9.09228e-21	CD4 Trm	Mns1
Snhg12	6.28412e-25	0.665997	0.29	0.198	9.62037e-21	CD4 Trm	Snhg12
Cd38	6.35029e-25	0.861721	0.173	0.097	9.72166e-21	CD4 Trm	Cd38
Fam49b	6.97319e-25	0.356497	0.541	0.434	1.06753e-20	CD4 Trm	Fam49b
Enpp1	6.97805e-25	1.12636	0.126	0.06	1.06827e-20	CD4 Trm	Enpp1
Cmc2	7.35152e-25	0.805928	0.176	0.098	1.12544e-20	CD4 Trm	Cmc2
Scly	7.37771e-25	0.975479	0.144	0.073	1.12945e-20	CD4 Trm	Scly
Hdhd5	7.84414e-25	1.03684	0.141	0.071	1.20086e-20	CD4 Trm	Hdhd5
Cblb	9.58224e-25	0.561374	0.326	0.229	1.46695e-20	CD4 Trm	Cblb
Nol7	1.00511e-24	0.438554	0.426	0.322	1.53872e-20	CD4 Trm	Nol7
Ppp6r1	1.11678e-24	0.605181	0.293	0.201	1.70967e-20	CD4 Trm	Ppp6r1
Psma1	1.42672e-24	0.514672	0.372	0.274	2.18417e-20	CD4 Trm	Psma1
Sidt1	1.51846e-24	1.35015	0.104	0.044	2.32461e-20	CD4 Trm	Sidt1
Cpeb1	1.75319e-24	1.64672	0.079	0.027	2.68396e-20	CD4 Trm	Cpeb1
Ssna1	1.76975e-24	0.891806	0.17	0.094	2.70931e-20	CD4 Trm	Ssna1
Ubr2	2.28628e-24	0.598596	0.312	0.217	3.50007e-20	CD4 Trm	Ubr2
Ndufa10	2.47009e-24	0.563076	0.304	0.21	3.78146e-20	CD4 Trm	Ndufa10
Cwc15	2.67907e-24	0.418397	0.453	0.356	4.10139e-20	CD4 Trm	Cwc15
Sirt7	2.7742e-24	0.546861	0.331	0.236	4.24702e-20	CD4 Trm	Sirt7
Ankrd13a	2.80266e-24	0.698422	0.22	0.136	4.29059e-20	CD4 Trm	Ankrd13a
Nfe2l2	2.98851e-24	0.842448	0.184	0.106	4.57512e-20	CD4 Trm	Nfe2l2
Ccdc50	3.09347e-24	0.765975	0.189	0.109	4.7358e-20	CD4 Trm	Ccdc50
Atp5f1	3.5853e-24	0.37414	0.502	0.4	5.48873e-20	CD4 Trm	Atp5f1
Rpl6	3.72457e-24	0.153154	0.99	0.978	5.70195e-20	CD4 Trm	Rpl6
Tspyl1	3.81893e-24	0.756102	0.196	0.116	5.8464e-20	CD4 Trm	Tspyl1
Rassf2	3.84354e-24	1.43849	0.092	0.036	5.88408e-20	CD4 Trm	Rassf2
Rpl7	3.98298e-24	0.15887	0.985	0.976	6.09754e-20	CD4 Trm	Rpl7
Dgka	4.17199e-24	0.546356	0.345	0.251	6.38691e-20	CD4 Trm	Dgka
Iigp1	4.68751e-24	0.958393	0.139	0.07	7.17611e-20	CD4 Trm	Iigp1
P2ry10b	4.95225e-24	2.42868	0.046	0.006	7.5814e-20	CD4 Trm	P2ry10b
Mgat2	5.23851e-24	0.651035	0.251	0.164	8.01963e-20	CD4 Trm	Mgat2
Soat2	5.67135e-24	2.20736	0.056	0.012	8.68227e-20	CD4 Trm	Soat2
Ezh1	7.04611e-24	0.768991	0.193	0.114	1.07869e-19	CD4 Trm	Ezh1
A430088P11Rik	7.0971e-24	3.72351	0.039	0.003	1.0865e-19	CD4 Trm	A430088P11Rik
Cage1	7.97665e-24	1.0297	0.137	0.069	1.22115e-19	CD4 Trm	Cage1
Irgm1	8.45398e-24	0.944375	0.155	0.084	1.29422e-19	CD4 Trm	Irgm1
Tln1	1.0065e-23	0.327224	0.609	0.511	1.54084e-19	CD4 Trm	Tln1
Bicdl1	1.17249e-23	1.69962	0.072	0.022	1.79497e-19	CD4 Trm	Bicdl1
Cep97	1.20618e-23	1.34189	0.089	0.034	1.84655e-19	CD4 Trm	Cep97
Cept1	1.28055e-23	0.816739	0.18	0.104	1.9604e-19	CD4 Trm	Cept1
Nemp2	1.46779e-23	1.56057	0.084	0.031	2.24704e-19	CD4 Trm	Nemp2
Mcm4	1.57015e-23	0.851679	0.169	0.095	2.40374e-19	CD4 Trm	Mcm4
Eif3h	2.13424e-23	0.297218	0.679	0.587	3.26731e-19	CD4 Trm	Eif3h
Rflnb	2.14201e-23	1.18746	0.111	0.05	3.27921e-19	CD4 Trm	Rflnb
Otulin	2.52719e-23	0.650438	0.224	0.141	3.86887e-19	CD4 Trm	Otulin
Akap13	3.31015e-23	0.326484	0.661	0.575	5.0675e-19	CD4 Trm	Akap13
Bcl2	3.94179e-23	1.0375	0.138	0.071	6.03449e-19	CD4 Trm	Bcl2
Rps6	4.00637e-23	0.136305	0.997	0.994	6.13336e-19	CD4 Trm	Rps6
Uqcrq	4.06329e-23	0.443948	0.37	0.271	6.22049e-19	CD4 Trm	Uqcrq
Pik3ip1	4.36913e-23	1.68571	0.072	0.023	6.6887e-19	CD4 Trm	Pik3ip1
Sec11a	5.8465e-23	0.453886	0.376	0.28	8.9504e-19	CD4 Trm	Sec11a
Mir142hg	7.0901e-23	0.428515	0.461	0.36	1.08542e-18	CD4 Trm	Mir142hg
Myb	8.83175e-23	2.03919	0.061	0.016	1.35205e-18	CD4 Trm	Myb
Ttc7	9.21757e-23	0.841801	0.163	0.091	1.41112e-18	CD4 Trm	Ttc7
Kdm7a	9.50184e-23	0.536458	0.306	0.214	1.45464e-18	CD4 Trm	Kdm7a
Frmd6	9.6932e-23	1.17009	0.113	0.053	1.48393e-18	CD4 Trm	Frmd6
Cap1	1.1104e-22	0.382058	0.486	0.386	1.69991e-18	CD4 Trm	Cap1
Taf12	1.13545e-22	0.835557	0.154	0.084	1.73826e-18	CD4 Trm	Taf12
Atp5l	1.20266e-22	0.279649	0.703	0.612	1.84115e-18	CD4 Trm	Atp5l
Ubn1	1.24783e-22	0.532316	0.315	0.223	1.9103e-18	CD4 Trm	Ubn1
Jakmip1	1.26976e-22	0.822427	0.172	0.099	1.94387e-18	CD4 Trm	Jakmip1
Ppp2r5a	1.38322e-22	0.399741	0.461	0.365	2.11758e-18	CD4 Trm	Ppp2r5a
Egr1	1.58006e-22	1.01803	0.238	0.157	2.41891e-18	CD4 Trm	Egr1
Lair1	1.5981e-22	3.3339	0.038	0.003	2.44653e-18	CD4 Trm	Lair1
Stk38	1.90449e-22	0.740817	0.217	0.138	2.91558e-18	CD4 Trm	Stk38
AU020206	2.05318e-22	0.337237	0.552	0.455	3.14321e-18	CD4 Trm	AU020206
Dzip1	2.39919e-22	2.6639	0.044	0.006	3.67292e-18	CD4 Trm	Dzip1
Il21	2.90225e-22	3.32132	0.044	0.007	4.44306e-18	CD4 Trm	Il21
Usp25	2.9898e-22	0.443903	0.405	0.31	4.57708e-18	CD4 Trm	Usp25
4933406I18Rik	3.13345e-22	2.15783	0.051	0.01	4.797e-18	CD4 Trm	4933406I18Rik
Sgtb	3.49178e-22	1.68789	0.07	0.022	5.34556e-18	CD4 Trm	Sgtb
Rpl18a	3.73915e-22	0.118086	1	1	5.72426e-18	CD4 Trm	Rpl18a
Csnk2b	3.91012e-22	0.380903	0.517	0.421	5.98601e-18	CD4 Trm	Csnk2b
Gm5106	4.72292e-22	2.18746	0.051	0.011	7.23031e-18	CD4 Trm	Gm5106
Maf1	4.78752e-22	0.43128	0.406	0.31	7.32921e-18	CD4 Trm	Maf1
Egr2	4.85027e-22	2.34122	0.053	0.012	7.42528e-18	CD4 Trm	Egr2
Ifit1bl1	5.08168e-22	1.892	0.064	0.019	7.77955e-18	CD4 Trm	Ifit1bl1
Atp6v1d	5.53855e-22	0.484644	0.317	0.224	8.47896e-18	CD4 Trm	Atp6v1d
Hivep2	5.8129e-22	0.415484	0.347	0.251	8.89898e-18	CD4 Trm	Hivep2
Srebf2	6.05133e-22	0.516699	0.322	0.232	9.26399e-18	CD4 Trm	Srebf2
Ptpre	6.05267e-22	0.901115	0.15	0.082	9.26603e-18	CD4 Trm	Ptpre
Chn2	6.2359e-22	0.910524	0.148	0.081	9.54653e-18	CD4 Trm	Chn2
Ddit3	6.37912e-22	0.768677	0.182	0.108	9.76579e-18	CD4 Trm	Ddit3
Ndufb11	6.94853e-22	0.37168	0.479	0.38	1.06375e-17	CD4 Trm	Ndufb11
Ntan1	8.07137e-22	0.668191	0.222	0.143	1.23565e-17	CD4 Trm	Ntan1
Slc20a1	8.83128e-22	1.07169	0.112	0.053	1.35198e-17	CD4 Trm	Slc20a1
Flt3l	9.21883e-22	0.638146	0.208	0.129	1.41131e-17	CD4 Trm	Flt3l
Slc38a1	9.75913e-22	0.509388	0.315	0.224	1.49403e-17	CD4 Trm	Slc38a1
Prdm1	1.0122e-21	0.748545	0.16	0.09	1.54958e-17	CD4 Trm	Prdm1
Ndufa3	1.06445e-21	0.422238	0.412	0.315	1.62957e-17	CD4 Trm	Ndufa3
Hipk1	1.17868e-21	0.666096	0.232	0.153	1.80445e-17	CD4 Trm	Hipk1
Rgs1	1.19499e-21	0.362322	0.792	0.74	1.82941e-17	CD4 Trm	Rgs1
Frg1	1.35518e-21	0.468161	0.34	0.249	2.07465e-17	CD4 Trm	Frg1
Virma	1.43579e-21	0.520243	0.294	0.206	2.19805e-17	CD4 Trm	Virma
Gtf2b	1.52792e-21	0.428152	0.411	0.314	2.3391e-17	CD4 Trm	Gtf2b
Slc28a2	1.60308e-21	0.62902	0.217	0.139	2.45415e-17	CD4 Trm	Slc28a2
Casp4	1.98957e-21	0.785814	0.173	0.102	3.04584e-17	CD4 Trm	Casp4
B4galt1	2.10314e-21	0.618917	0.241	0.16	3.21969e-17	CD4 Trm	B4galt1
Pdcd6ip	2.29055e-21	0.400308	0.441	0.347	3.50661e-17	CD4 Trm	Pdcd6ip
Rgs3	2.41994e-21	1.01437	0.128	0.066	3.70468e-17	CD4 Trm	Rgs3
Eif3k	2.4276e-21	0.338198	0.59	0.498	3.71642e-17	CD4 Trm	Eif3k
Emc10	2.74119e-21	0.613609	0.244	0.163	4.19648e-17	CD4 Trm	Emc10
Pag1	2.85114e-21	1.31901	0.095	0.041	4.36481e-17	CD4 Trm	Pag1
Ripor2	2.97085e-21	0.812227	0.179	0.108	4.54808e-17	CD4 Trm	Ripor2
Grap	3.91682e-21	0.442368	0.353	0.262	5.99626e-17	CD4 Trm	Grap
Tgfbr3	4.18526e-21	3.07931	0.038	0.004	6.40722e-17	CD4 Trm	Tgfbr3
Rnf19a	4.21012e-21	0.642986	0.242	0.162	6.44527e-17	CD4 Trm	Rnf19a
Rpl41	5.54422e-21	0.125228	0.997	0.991	8.48765e-17	CD4 Trm	Rpl41
Plcl2	5.99448e-21	0.585359	0.249	0.168	9.17694e-17	CD4 Trm	Plcl2
Nudt21	6.37253e-21	0.472336	0.343	0.253	9.7557e-17	CD4 Trm	Nudt21
Mrpl33	6.95263e-21	0.419533	0.371	0.277	1.06438e-16	CD4 Trm	Mrpl33
Mosmo	7.03299e-21	1.21445	0.102	0.047	1.07668e-16	CD4 Trm	Mosmo
Hbp1	7.26531e-21	0.427696	0.378	0.285	1.11225e-16	CD4 Trm	Hbp1
Ifi209	7.69572e-21	0.534317	0.306	0.218	1.17814e-16	CD4 Trm	Ifi209
Mkrn1	8.37344e-21	0.396497	0.418	0.326	1.28189e-16	CD4 Trm	Mkrn1
Uqcrfs1	8.54273e-21	0.427579	0.394	0.302	1.30781e-16	CD4 Trm	Uqcrfs1
Lpar6	1.20318e-20	0.840156	0.135	0.072	1.84195e-16	CD4 Trm	Lpar6
Rpl9	1.24611e-20	0.120044	0.997	0.995	1.90766e-16	CD4 Trm	Rpl9
Ptpn4	1.41821e-20	1.4454	0.081	0.032	2.17114e-16	CD4 Trm	Ptpn4
Oaz1	1.66552e-20	0.157939	0.972	0.958	2.54974e-16	CD4 Trm	Oaz1
4921524J17Rik	1.84182e-20	0.699576	0.191	0.119	2.81964e-16	CD4 Trm	4921524J17Rik
Cd2bp2	1.86663e-20	0.791531	0.154	0.087	2.85762e-16	CD4 Trm	Cd2bp2
Tmem50b	2.12134e-20	0.960102	0.122	0.062	3.24756e-16	CD4 Trm	Tmem50b
Rps17	2.2011e-20	0.194077	0.847	0.769	3.36966e-16	CD4 Trm	Rps17
Ndufs4	2.37953e-20	0.491039	0.332	0.245	3.64282e-16	CD4 Trm	Ndufs4
Sc5d	2.46372e-20	0.827944	0.163	0.096	3.77171e-16	CD4 Trm	Sc5d
Morc3	3.14163e-20	0.751414	0.161	0.094	4.80951e-16	CD4 Trm	Morc3
Gimap1	3.16879e-20	0.334548	0.49	0.396	4.8511e-16	CD4 Trm	Gimap1
Rab5if	3.53679e-20	0.598078	0.224	0.147	5.41447e-16	CD4 Trm	Rab5if
Cox6b1	3.65891e-20	0.309374	0.609	0.521	5.60143e-16	CD4 Trm	Cox6b1
Rab11fip4	3.77063e-20	1.06168	0.108	0.052	5.77245e-16	CD4 Trm	Rab11fip4
Cops9	3.80721e-20	0.421991	0.38	0.29	5.82846e-16	CD4 Trm	Cops9
Tspan3	3.93309e-20	0.986325	0.134	0.073	6.02117e-16	CD4 Trm	Tspan3
Abhd8	4.3343e-20	0.886191	0.14	0.077	6.63537e-16	CD4 Trm	Abhd8
Cdadc1	4.6564e-20	0.932579	0.134	0.073	7.12849e-16	CD4 Trm	Cdadc1
Idh3b	4.71378e-20	0.454987	0.333	0.246	7.21633e-16	CD4 Trm	Idh3b
Aplp2	4.80929e-20	0.461978	0.392	0.305	7.36255e-16	CD4 Trm	Aplp2
Idnk	5.42996e-20	0.534955	0.262	0.182	8.31273e-16	CD4 Trm	Idnk
Gm48228	5.74043e-20	0.761635	0.162	0.095	8.78803e-16	CD4 Trm	Gm48228
Vasp	6.15099e-20	0.313667	0.598	0.513	9.41655e-16	CD4 Trm	Vasp
Atg12	6.88291e-20	0.628595	0.183	0.112	1.05371e-15	CD4 Trm	Atg12
Prdx2	6.96578e-20	0.501122	0.337	0.252	1.06639e-15	CD4 Trm	Prdx2
Psmd4	7.0112e-20	0.368793	0.47	0.379	1.07334e-15	CD4 Trm	Psmd4
Abhd17a	7.39637e-20	0.502548	0.278	0.195	1.13231e-15	CD4 Trm	Abhd17a
Slc26a11	8.98542e-20	1.80637	0.057	0.017	1.37558e-15	CD4 Trm	Slc26a11
Myh9	9.06666e-20	0.288311	0.638	0.552	1.38802e-15	CD4 Trm	Myh9
Chfr	9.12176e-20	0.723526	0.195	0.124	1.39645e-15	CD4 Trm	Chfr
Mat2b	9.23471e-20	0.399469	0.385	0.295	1.41374e-15	CD4 Trm	Mat2b
Srp9	9.74367e-20	0.417238	0.401	0.313	1.49166e-15	CD4 Trm	Srp9
Cers6	9.99564e-20	1.42153	0.065	0.022	1.53023e-15	CD4 Trm	Cers6
Trappc8	1.03971e-19	0.840597	0.135	0.073	1.5917e-15	CD4 Trm	Trappc8
Srfbp1	1.04091e-19	1.14653	0.092	0.041	1.59353e-15	CD4 Trm	Srfbp1
Ly9	1.04944e-19	0.548014	0.29	0.208	1.60658e-15	CD4 Trm	Ly9
Ube2h	1.11071e-19	0.438824	0.335	0.248	1.70038e-15	CD4 Trm	Ube2h
1500009L16Rik	1.12946e-19	1.44614	0.067	0.023	1.72909e-15	CD4 Trm	1500009L16Rik
Mrpl58	1.26411e-19	0.750889	0.176	0.107	1.93522e-15	CD4 Trm	Mrpl58
Dnm2	1.29505e-19	0.426768	0.384	0.297	1.9826e-15	CD4 Trm	Dnm2
Pim2	1.33971e-19	1.09962	0.124	0.066	2.05097e-15	CD4 Trm	Pim2
Ncald	1.44584e-19	3.66779	0.032	0.003	2.21344e-15	CD4 Trm	Ncald
Maml2	1.45404e-19	1.06289	0.124	0.065	2.22599e-15	CD4 Trm	Maml2
Atp5mpl	1.46118e-19	0.368242	0.453	0.36	2.23692e-15	CD4 Trm	Atp5mpl
2010016I18Rik	1.47029e-19	2.29304	0.044	0.009	2.25086e-15	CD4 Trm	2010016I18Rik
Usp15	1.69967e-19	0.52265	0.256	0.176	2.60203e-15	CD4 Trm	Usp15
Tomm22	1.8675e-19	0.403844	0.4	0.312	2.85895e-15	CD4 Trm	Tomm22
Ss18	2.07449e-19	0.619828	0.241	0.165	3.17583e-15	CD4 Trm	Ss18
Ppp1r12a	2.25449e-19	0.328322	0.534	0.446	3.4514e-15	CD4 Trm	Ppp1r12a
Snrk	2.32369e-19	0.854145	0.14	0.079	3.55734e-15	CD4 Trm	Snrk
Anxa6	3.24726e-19	0.404816	0.386	0.3	4.97123e-15	CD4 Trm	Anxa6
Hpcal1	3.40245e-19	0.572335	0.238	0.162	5.20882e-15	CD4 Trm	Hpcal1
Ctsc	3.61567e-19	0.705872	0.192	0.122	5.53522e-15	CD4 Trm	Ctsc
Tram1	3.61761e-19	0.402932	0.392	0.304	5.5382e-15	CD4 Trm	Tram1
Rnasel	3.68005e-19	0.859838	0.137	0.076	5.63379e-15	CD4 Trm	Rnasel
Ggnbp2	4.28599e-19	0.473248	0.31	0.227	6.56143e-15	CD4 Trm	Ggnbp2
1810058I24Rik	4.40689e-19	0.556555	0.257	0.18	6.74651e-15	CD4 Trm	1810058I24Rik
Rps3a1	4.48869e-19	0.123674	0.997	0.993	6.87174e-15	CD4 Trm	Rps3a1
Ndufb8	4.93688e-19	0.432848	0.338	0.253	7.55787e-15	CD4 Trm	Ndufb8
Bak1	5.39928e-19	0.764385	0.161	0.096	8.26576e-15	CD4 Trm	Bak1
Nudt16l1	5.71104e-19	0.779723	0.145	0.083	8.74303e-15	CD4 Trm	Nudt16l1
Igbp1	6.05234e-19	0.512359	0.283	0.203	9.26552e-15	CD4 Trm	Igbp1
Bdh1	6.74114e-19	1.38147	0.072	0.028	1.032e-14	CD4 Trm	Bdh1
Fam111a	7.70641e-19	1.04322	0.099	0.047	1.17977e-14	CD4 Trm	Fam111a
Srpk2	7.8937e-19	0.695184	0.187	0.118	1.20845e-14	CD4 Trm	Srpk2
Gbp8	8.52527e-19	0.591799	0.223	0.149	1.30513e-14	CD4 Trm	Gbp8
0610012G03Rik	8.82808e-19	0.74864	0.157	0.094	1.35149e-14	CD4 Trm	0610012G03Rik
Gbp2	9.04701e-19	0.711968	0.242	0.168	1.38501e-14	CD4 Trm	Gbp2
Ntrk3	9.50553e-19	1.44892	0.068	0.025	1.4552e-14	CD4 Trm	Ntrk3
Snx6	9.87039e-19	0.611896	0.211	0.14	1.51106e-14	CD4 Trm	Snx6
Eif3f	1.03573e-18	0.230768	0.763	0.698	1.58561e-14	CD4 Trm	Eif3f
S100a13	1.08237e-18	0.442345	0.349	0.263	1.657e-14	CD4 Trm	S100a13
Mrps5	1.18209e-18	0.750213	0.153	0.09	1.80966e-14	CD4 Trm	Mrps5
Rdx	1.34041e-18	0.450088	0.317	0.233	2.05204e-14	CD4 Trm	Rdx
Nck1	1.40307e-18	0.872586	0.131	0.073	2.14796e-14	CD4 Trm	Nck1
Clint1	1.62046e-18	0.252527	0.658	0.574	2.48076e-14	CD4 Trm	Clint1
Lbr	1.63286e-18	0.475506	0.298	0.217	2.49975e-14	CD4 Trm	Lbr
Plk3	1.65447e-18	0.557209	0.261	0.185	2.53283e-14	CD4 Trm	Plk3
Lfng	1.68622e-18	1.1921	0.09	0.042	2.58144e-14	CD4 Trm	Lfng
Klrb1f	1.70506e-18	2.05126	0.045	0.011	2.61027e-14	CD4 Trm	Klrb1f
Rps7	1.77958e-18	0.10422	0.998	0.998	2.72435e-14	CD4 Trm	Rps7
Max	1.79314e-18	0.531991	0.242	0.166	2.74512e-14	CD4 Trm	Max
Ccnd3	1.915e-18	0.637179	0.179	0.112	2.93168e-14	CD4 Trm	Ccnd3
Mrpl30	1.92189e-18	0.518878	0.268	0.189	2.94221e-14	CD4 Trm	Mrpl30
Uqcc3	1.98427e-18	0.66711	0.187	0.119	3.03772e-14	CD4 Trm	Uqcc3
Smndc1	1.98958e-18	0.425429	0.334	0.249	3.04585e-14	CD4 Trm	Smndc1
Nedd9	2.10739e-18	0.413673	0.43	0.345	3.2262e-14	CD4 Trm	Nedd9
Fam102a	2.27212e-18	0.603942	0.213	0.141	3.47839e-14	CD4 Trm	Fam102a
Nmnat2	2.43076e-18	1.70669	0.063	0.022	3.72124e-14	CD4 Trm	Nmnat2
Smc6	2.48117e-18	0.462201	0.325	0.245	3.79842e-14	CD4 Trm	Smc6
Isg15	2.52287e-18	0.482153	0.384	0.296	3.86225e-14	CD4 Trm	Isg15
Ipcef1	2.54223e-18	0.42674	0.304	0.221	3.8919e-14	CD4 Trm	Ipcef1
Fdps	2.83756e-18	1.00332	0.117	0.062	4.34402e-14	CD4 Trm	Fdps
Triap1	3.07756e-18	0.814963	0.126	0.069	4.71144e-14	CD4 Trm	Triap1
Ctse	3.10959e-18	0.98902	0.116	0.061	4.76047e-14	CD4 Trm	Ctse
Luzp1	3.29649e-18	1.47368	0.065	0.024	5.0466e-14	CD4 Trm	Luzp1
Hic1	3.51078e-18	0.837122	0.145	0.085	5.37466e-14	CD4 Trm	Hic1
Dusp6	3.79361e-18	0.775758	0.169	0.105	5.80764e-14	CD4 Trm	Dusp6
Ppp4c	3.82957e-18	0.361597	0.433	0.347	5.86269e-14	CD4 Trm	Ppp4c
Ccnh	4.325e-18	0.716154	0.166	0.102	6.62115e-14	CD4 Trm	Ccnh
Ngly1	4.98166e-18	0.689469	0.161	0.098	7.62643e-14	CD4 Trm	Ngly1
Orai2	5.13054e-18	0.935995	0.117	0.062	7.85435e-14	CD4 Trm	Orai2
Mri1	6.87413e-18	0.592911	0.187	0.119	1.05236e-13	CD4 Trm	Mri1
Dnmt1	7.74928e-18	0.721909	0.157	0.095	1.18634e-13	CD4 Trm	Dnmt1
Rpl27a	7.93042e-18	0.11779	0.996	0.996	1.21407e-13	CD4 Trm	Rpl27a
Rin3	1.0062e-17	0.839965	0.141	0.083	1.5404e-13	CD4 Trm	Rin3
Hexim1	1.18879e-17	0.338194	0.504	0.42	1.81992e-13	CD4 Trm	Hexim1
Mxd4	1.19938e-17	0.370264	0.37	0.285	1.83614e-13	CD4 Trm	Mxd4
Rack1	1.4741e-17	0.154958	0.957	0.935	2.25669e-13	CD4 Trm	Rack1
Pnrc2	1.50417e-17	0.587337	0.231	0.16	2.30274e-13	CD4 Trm	Pnrc2
Gnpda1	1.62368e-17	1.20023	0.084	0.039	2.48569e-13	CD4 Trm	Gnpda1
Spn	2.01268e-17	0.470722	0.296	0.218	3.08121e-13	CD4 Trm	Spn
Desi1	2.21832e-17	0.749058	0.159	0.098	3.39603e-13	CD4 Trm	Desi1
Ppil1	2.47145e-17	0.495288	0.259	0.183	3.78354e-13	CD4 Trm	Ppil1
Psma2	2.50293e-17	0.260989	0.602	0.517	3.83173e-13	CD4 Trm	Psma2
Utrn	2.72371e-17	0.429725	0.338	0.258	4.16972e-13	CD4 Trm	Utrn
Hip1	2.96993e-17	0.962772	0.111	0.059	4.54667e-13	CD4 Trm	Hip1
Acp5	3.25105e-17	0.549798	0.217	0.148	4.97703e-13	CD4 Trm	Acp5
Asb2	3.34148e-17	0.442666	0.429	0.354	5.11547e-13	CD4 Trm	Asb2
Ttc7b	3.54462e-17	1.38731	0.067	0.027	5.42646e-13	CD4 Trm	Ttc7b
Vps37b	3.96777e-17	0.254075	0.911	0.877	6.07427e-13	CD4 Trm	Vps37b
Dyrk2	4.07878e-17	0.910755	0.111	0.059	6.24421e-13	CD4 Trm	Dyrk2
Mtfr1l	4.36881e-17	0.929628	0.116	0.063	6.68822e-13	CD4 Trm	Mtfr1l
Smim20	4.94318e-17	0.76292	0.144	0.086	7.56752e-13	CD4 Trm	Smim20
Paip2	5.1892e-17	0.246775	0.595	0.507	7.94414e-13	CD4 Trm	Paip2
Igkc	5.29839e-17	1.31039	0.663	0.608	8.11131e-13	CD4 Trm	Igkc
Dleu2	5.70665e-17	0.949848	0.113	0.061	8.73631e-13	CD4 Trm	Dleu2
Ccdc12	5.80832e-17	0.35435	0.385	0.299	8.89196e-13	CD4 Trm	Ccdc12
Pym1	6.08806e-17	0.792947	0.138	0.082	9.3202e-13	CD4 Trm	Pym1
Mrpl4	6.14486e-17	0.526481	0.227	0.157	9.40716e-13	CD4 Trm	Mrpl4
Dusp5	6.2681e-17	0.236666	0.707	0.634	9.59583e-13	CD4 Trm	Dusp5
Itgb1bp1	7.05273e-17	0.778347	0.14	0.083	1.0797e-12	CD4 Trm	Itgb1bp1
Gid8	7.30497e-17	0.821025	0.137	0.081	1.11832e-12	CD4 Trm	Gid8
Tomm20	7.39552e-17	0.258097	0.603	0.524	1.13218e-12	CD4 Trm	Tomm20
Dda1	8.19695e-17	0.502625	0.238	0.166	1.25487e-12	CD4 Trm	Dda1
Zdhhc18	8.29628e-17	0.406922	0.365	0.286	1.27008e-12	CD4 Trm	Zdhhc18
Xylt2	8.45224e-17	1.49397	0.058	0.02	1.29395e-12	CD4 Trm	Xylt2
Rps27a	8.66282e-17	0.128876	0.991	0.988	1.32619e-12	CD4 Trm	Rps27a
Ostm1	8.79054e-17	0.758219	0.15	0.092	1.34574e-12	CD4 Trm	Ostm1
H2-M3	9.02504e-17	0.597866	0.212	0.145	1.38164e-12	CD4 Trm	H2-M3
Snhg3	9.39316e-17	0.763731	0.138	0.082	1.438e-12	CD4 Trm	Snhg3
Ndufa2	1.0269e-16	0.313347	0.456	0.367	1.57209e-12	CD4 Trm	Ndufa2
Lasp1	1.14664e-16	0.549068	0.196	0.13	1.75539e-12	CD4 Trm	Lasp1
Cd247	1.25161e-16	0.264884	0.644	0.566	1.9161e-12	CD4 Trm	Cd247
Zfas1	1.31274e-16	0.343272	0.418	0.336	2.00967e-12	CD4 Trm	Zfas1
Tbc1d22b	1.3161e-16	0.872104	0.119	0.066	2.01481e-12	CD4 Trm	Tbc1d22b
Atp8b2	1.38036e-16	1.05343	0.082	0.038	2.11319e-12	CD4 Trm	Atp8b2
Depdc5	1.39491e-16	0.957656	0.11	0.059	2.13546e-12	CD4 Trm	Depdc5
Higd2a	1.40198e-16	0.429301	0.294	0.216	2.14629e-12	CD4 Trm	Higd2a
Fgd3	1.51061e-16	0.818435	0.142	0.085	2.31259e-12	CD4 Trm	Fgd3
Grk2	1.55437e-16	0.406904	0.339	0.26	2.37959e-12	CD4 Trm	Grk2
Dok2	1.56959e-16	0.488546	0.266	0.193	2.40288e-12	CD4 Trm	Dok2
Esd	1.60785e-16	0.453925	0.29	0.215	2.46146e-12	CD4 Trm	Esd
Dock11	1.63297e-16	0.581185	0.192	0.127	2.49991e-12	CD4 Trm	Dock11
Mrps30	1.65132e-16	0.682017	0.146	0.088	2.52801e-12	CD4 Trm	Mrps30
Pou6f1	1.79333e-16	1.16049	0.078	0.035	2.74541e-12	CD4 Trm	Pou6f1
Mlx	1.8626e-16	0.665328	0.15	0.091	2.85145e-12	CD4 Trm	Mlx
Keap1	1.9992e-16	0.92971	0.118	0.066	3.06058e-12	CD4 Trm	Keap1
Morrbid	2.09244e-16	0.692883	0.149	0.09	3.20332e-12	CD4 Trm	Morrbid
Mrpl41	2.13314e-16	0.83182	0.135	0.08	3.26563e-12	CD4 Trm	Mrpl41
Ap2s1	2.34244e-16	0.45313	0.29	0.215	3.58605e-12	CD4 Trm	Ap2s1
Padi2	2.3992e-16	0.76772	0.118	0.065	3.67294e-12	CD4 Trm	Padi2
Uqcc2	2.59046e-16	0.783387	0.132	0.077	3.96573e-12	CD4 Trm	Uqcc2
Mef2a	3.26472e-16	0.670108	0.149	0.091	4.99797e-12	CD4 Trm	Mef2a
Pfdn5	3.26902e-16	0.239978	0.728	0.654	5.00455e-12	CD4 Trm	Pfdn5
Saraf	3.28106e-16	0.168043	0.744	0.663	5.02297e-12	CD4 Trm	Saraf
Rad21	3.47774e-16	0.383647	0.372	0.292	5.32407e-12	CD4 Trm	Rad21
1810041H14Rik	3.56731e-16	1.62924	0.045	0.013	5.46119e-12	CD4 Trm	1810041H14Rik
Il1rl2	3.59387e-16	2.59915	0.033	0.006	5.50186e-12	CD4 Trm	Il1rl2
Ptpn11	3.91135e-16	0.509846	0.22	0.152	5.98789e-12	CD4 Trm	Ptpn11
Gm37065	4.02743e-16	2.43769	0.035	0.007	6.16559e-12	CD4 Trm	Gm37065
Rpl24	4.04309e-16	0.184982	0.897	0.854	6.18956e-12	CD4 Trm	Rpl24
Rras2	4.23684e-16	0.943942	0.103	0.055	6.48618e-12	CD4 Trm	Rras2
Parp14	4.59466e-16	0.631399	0.181	0.119	7.03396e-12	CD4 Trm	Parp14
Arhgef6	4.72159e-16	0.48004	0.254	0.183	7.22828e-12	CD4 Trm	Arhgef6
Card11	4.86328e-16	0.607408	0.168	0.108	7.44519e-12	CD4 Trm	Card11
Usp24	5.0055e-16	0.785917	0.133	0.079	7.66292e-12	CD4 Trm	Usp24
Stard7	5.42442e-16	0.924962	0.101	0.053	8.30424e-12	CD4 Trm	Stard7
Pde4d	5.64819e-16	0.42355	0.368	0.294	8.64682e-12	CD4 Trm	Pde4d
Dnajc8	5.72989e-16	0.293483	0.499	0.413	8.77189e-12	CD4 Trm	Dnajc8
Jchain	5.8375e-16	1.19834	0.299	0.231	8.93663e-12	CD4 Trm	Jchain
Rmnd5b	6.18717e-16	0.825778	0.121	0.069	9.47194e-12	CD4 Trm	Rmnd5b
Gm12185	6.52798e-16	0.61078	0.212	0.148	9.99369e-12	CD4 Trm	Gm12185
Rnf113a2	6.67632e-16	0.687056	0.144	0.088	1.02208e-11	CD4 Trm	Rnf113a2
Inpp5b	6.82122e-16	0.736634	0.128	0.075	1.04426e-11	CD4 Trm	Inpp5b
Tmem14c	7.05187e-16	0.403978	0.304	0.229	1.07957e-11	CD4 Trm	Tmem14c
Ccl3	7.56951e-16	2.34267	0.042	0.011	1.15882e-11	CD4 Trm	Ccl3
Cox6a1	8.50746e-16	0.242166	0.653	0.574	1.30241e-11	CD4 Trm	Cox6a1
Ppp4r3b	8.61122e-16	0.450018	0.28	0.208	1.31829e-11	CD4 Trm	Ppp4r3b
4930453N24Rik	1.01549e-15	0.71439	0.158	0.101	1.55462e-11	CD4 Trm	4930453N24Rik
Atxn2l	1.12269e-15	0.40737	0.344	0.269	1.71872e-11	CD4 Trm	Atxn2l
D030056L22Rik	1.14478e-15	0.894137	0.111	0.062	1.75254e-11	CD4 Trm	D030056L22Rik
Ifih1	1.16816e-15	0.820996	0.145	0.09	1.78834e-11	CD4 Trm	Ifih1
Znrf1	1.21712e-15	0.437752	0.25	0.179	1.86329e-11	CD4 Trm	Znrf1
Art2b	1.3202e-15	0.464826	0.256	0.186	2.0211e-11	CD4 Trm	Art2b
Gpc1	1.43766e-15	2.40673	0.034	0.007	2.20091e-11	CD4 Trm	Gpc1
Ap3s1	1.51363e-15	0.454399	0.294	0.221	2.31722e-11	CD4 Trm	Ap3s1
Eml4	1.53194e-15	0.569424	0.188	0.126	2.34524e-11	CD4 Trm	Eml4
Vdac2	1.57169e-15	0.397606	0.346	0.27	2.4061e-11	CD4 Trm	Vdac2
Csk	1.69521e-15	0.334941	0.42	0.341	2.59519e-11	CD4 Trm	Csk
Prelid1	1.70484e-15	0.354278	0.45	0.377	2.60993e-11	CD4 Trm	Prelid1
Hdac7	1.79784e-15	0.541796	0.216	0.151	2.75231e-11	CD4 Trm	Hdac7
Dmac1	2.00116e-15	0.987373	0.085	0.042	3.06357e-11	CD4 Trm	Dmac1
BE692007	2.10568e-15	0.677982	0.145	0.09	3.22358e-11	CD4 Trm	BE692007
Rpl37	2.18506e-15	0.133405	0.987	0.981	3.3451e-11	CD4 Trm	Rpl37
Prmt9	2.2642e-15	1.18408	0.065	0.028	3.46627e-11	CD4 Trm	Prmt9
Myl12a	2.44553e-15	0.237177	0.72	0.658	3.74387e-11	CD4 Trm	Myl12a
Ap1s2	2.62708e-15	0.823015	0.112	0.063	4.0218e-11	CD4 Trm	Ap1s2
Cd200r4	2.76904e-15	1.37063	0.062	0.026	4.23912e-11	CD4 Trm	Cd200r4
Ing3	3.16113e-15	0.450574	0.244	0.176	4.83937e-11	CD4 Trm	Ing3
Smim4	3.20298e-15	0.795268	0.114	0.065	4.90344e-11	CD4 Trm	Smim4
2810001G20Rik	3.30377e-15	1.22775	0.066	0.028	5.05774e-11	CD4 Trm	2810001G20Rik
Gypc	3.36716e-15	0.820521	0.097	0.051	5.15478e-11	CD4 Trm	Gypc
Mvk	3.5675e-15	0.942209	0.09	0.046	5.46149e-11	CD4 Trm	Mvk
Polr1d	3.65146e-15	0.224255	0.693	0.624	5.59002e-11	CD4 Trm	Polr1d
Cox14	3.85037e-15	0.377197	0.4	0.326	5.89453e-11	CD4 Trm	Cox14
Tnfrsf26	4.07999e-15	2.26546	0.035	0.008	6.24605e-11	CD4 Trm	Tnfrsf26
Polr3c	4.09319e-15	0.728391	0.135	0.082	6.26627e-11	CD4 Trm	Polr3c
Tbkbp1	4.44491e-15	3.04192	0.027	0.003	6.80471e-11	CD4 Trm	Tbkbp1
Thap3	4.45082e-15	0.648864	0.152	0.096	6.81376e-11	CD4 Trm	Thap3
Mettl7a1	4.46799e-15	1.10808	0.071	0.032	6.84005e-11	CD4 Trm	Mettl7a1
Mrpl43	4.68421e-15	0.536686	0.209	0.145	7.17106e-11	CD4 Trm	Mrpl43
Zfp330	4.87948e-15	0.61919	0.172	0.113	7.47e-11	CD4 Trm	Zfp330
Ikbkb	4.9472e-15	0.526084	0.225	0.16	7.57367e-11	CD4 Trm	Ikbkb
Gcc2	5.42238e-15	0.75722	0.12	0.069	8.30112e-11	CD4 Trm	Gcc2
Sec61b	6.91072e-15	0.281202	0.538	0.464	1.05796e-10	CD4 Trm	Sec61b
Rpl11	7.05162e-15	0.105044	0.995	0.99	1.07953e-10	CD4 Trm	Rpl11
Mplkip	7.13408e-15	0.762058	0.113	0.064	1.09216e-10	CD4 Trm	Mplkip
Eif2s2	7.50614e-15	0.241258	0.576	0.498	1.14911e-10	CD4 Trm	Eif2s2
Tmem126a	8.4729e-15	0.632675	0.176	0.118	1.29712e-10	CD4 Trm	Tmem126a
Hdac1	1.0189e-14	0.476259	0.273	0.204	1.55984e-10	CD4 Trm	Hdac1
Atp5g3	1.03579e-14	0.272544	0.452	0.37	1.58569e-10	CD4 Trm	Atp5g3
BC031181	1.08971e-14	0.373582	0.311	0.238	1.66823e-10	CD4 Trm	BC031181
Dennd4c	1.19785e-14	0.902302	0.098	0.053	1.83379e-10	CD4 Trm	Dennd4c
Vrk3	1.20001e-14	0.597843	0.178	0.119	1.83709e-10	CD4 Trm	Vrk3
Srp72	1.22084e-14	0.364779	0.315	0.241	1.86898e-10	CD4 Trm	Srp72
Polr3k	1.34567e-14	0.826833	0.109	0.062	2.06008e-10	CD4 Trm	Polr3k
Vsir	1.3729e-14	0.3597	0.337	0.262	2.10178e-10	CD4 Trm	Vsir
Atp2a3	1.37515e-14	0.617405	0.162	0.105	2.10522e-10	CD4 Trm	Atp2a3
Gadd45gip1	1.39911e-14	0.578009	0.167	0.109	2.1419e-10	CD4 Trm	Gadd45gip1
Gm19585	1.43441e-14	0.555283	0.234	0.169	2.19593e-10	CD4 Trm	Gm19585
Trim56	1.4367e-14	0.859937	0.123	0.074	2.19945e-10	CD4 Trm	Trim56
Kidins220	1.58192e-14	0.753764	0.141	0.088	2.42177e-10	CD4 Trm	Kidins220
Tmem167	1.71975e-14	0.353177	0.332	0.259	2.63276e-10	CD4 Trm	Tmem167
Map4k4	1.73864e-14	0.416594	0.259	0.19	2.66168e-10	CD4 Trm	Map4k4
Mospd3	1.76739e-14	0.597159	0.158	0.102	2.7057e-10	CD4 Trm	Mospd3
Heph	1.82001e-14	0.352498	0.386	0.311	2.78625e-10	CD4 Trm	Heph
Chd1	1.85451e-14	0.364541	0.351	0.277	2.83906e-10	CD4 Trm	Chd1
Psmb2	2.08754e-14	0.29246	0.471	0.395	3.19581e-10	CD4 Trm	Psmb2
Tcrg-C4	2.20652e-14	1.90311	0.042	0.013	3.37796e-10	CD4 Trm	Tcrg-C4
Tnf	2.24758e-14	1.32003	0.075	0.036	3.44082e-10	CD4 Trm	Tnf
Hmgn1	2.2526e-14	0.65412	0.159	0.104	3.4485e-10	CD4 Trm	Hmgn1
Tap2	2.27446e-14	0.33293	0.404	0.331	3.48198e-10	CD4 Trm	Tap2
Lrmp	2.47596e-14	0.488202	0.226	0.162	3.79045e-10	CD4 Trm	Lrmp
Kras	2.58636e-14	0.356362	0.382	0.306	3.95946e-10	CD4 Trm	Kras
Dennd1c	2.59672e-14	0.372681	0.302	0.231	3.97532e-10	CD4 Trm	Dennd1c
Snrpc	2.61399e-14	0.339463	0.357	0.282	4.00176e-10	CD4 Trm	Snrpc
Zranb2	2.79626e-14	0.551272	0.183	0.123	4.28079e-10	CD4 Trm	Zranb2
Vps26b	2.84107e-14	0.564377	0.184	0.125	4.34939e-10	CD4 Trm	Vps26b
Psme2	2.91444e-14	0.180442	0.651	0.57	4.46172e-10	CD4 Trm	Psme2
Txn1	3.06487e-14	0.311045	0.49	0.412	4.69201e-10	CD4 Trm	Txn1
Arpc5l	3.22487e-14	0.474129	0.202	0.14	4.93695e-10	CD4 Trm	Arpc5l
Cdc42se1	3.27595e-14	0.440517	0.27	0.202	5.01515e-10	CD4 Trm	Cdc42se1
Wtap	3.36179e-14	0.394202	0.291	0.221	5.14656e-10	CD4 Trm	Wtap
Mob2	3.37688e-14	0.601251	0.169	0.112	5.16966e-10	CD4 Trm	Mob2
Rps3	3.51008e-14	0.101666	0.997	0.995	5.37358e-10	CD4 Trm	Rps3
Cdc37	3.62509e-14	0.292104	0.453	0.376	5.54965e-10	CD4 Trm	Cdc37
Chpt1	4.15936e-14	2.14143	0.031	0.006	6.36756e-10	CD4 Trm	Chpt1
Rpl7a	4.32268e-14	0.125636	0.966	0.957	6.6176e-10	CD4 Trm	Rpl7a
Ppp3cb	4.40756e-14	0.478872	0.239	0.174	6.74754e-10	CD4 Trm	Ppp3cb
1110038F14Rik	4.53086e-14	0.701918	0.13	0.08	6.93629e-10	CD4 Trm	1110038F14Rik
Rassf1	4.85061e-14	0.56645	0.166	0.11	7.42581e-10	CD4 Trm	Rassf1
Amz2	4.89642e-14	0.530232	0.191	0.132	7.49593e-10	CD4 Trm	Amz2
Zfp652	5.03968e-14	0.859142	0.114	0.067	7.71525e-10	CD4 Trm	Zfp652
Gapdh	5.27338e-14	0.170195	0.904	0.878	8.07302e-10	CD4 Trm	Gapdh
Mrps23	5.44175e-14	0.623078	0.157	0.102	8.33077e-10	CD4 Trm	Mrps23
Kif2a	5.45576e-14	0.516255	0.199	0.139	8.35223e-10	CD4 Trm	Kif2a
Rps4x	6.00079e-14	0.101898	0.995	0.99	9.18661e-10	CD4 Trm	Rps4x
Tex9	6.19499e-14	1.88335	0.04	0.012	9.4839e-10	CD4 Trm	Tex9
Rbm22	6.88535e-14	0.356642	0.313	0.241	1.05408e-09	CD4 Trm	Rbm22
Usp3	7.13319e-14	0.464164	0.238	0.174	1.09202e-09	CD4 Trm	Usp3
Mrps21	7.22602e-14	0.409048	0.269	0.202	1.10623e-09	CD4 Trm	Mrps21
Hmgn2	7.31226e-14	0.504973	0.25	0.186	1.11943e-09	CD4 Trm	Hmgn2
Olfr1033	7.34769e-14	0.546242	0.231	0.169	1.12486e-09	CD4 Trm	Olfr1033
Npat	8.26646e-14	1.02721	0.078	0.039	1.26551e-09	CD4 Trm	Npat
Tle4	8.48941e-14	0.626888	0.166	0.111	1.29964e-09	CD4 Trm	Tle4
Snapc5	8.77746e-14	0.61216	0.163	0.108	1.34374e-09	CD4 Trm	Snapc5
Hist1h1c	9.21358e-14	0.572444	0.192	0.133	1.41051e-09	CD4 Trm	Hist1h1c
Srp19	9.82346e-14	0.451681	0.248	0.183	1.50387e-09	CD4 Trm	Srp19
Selenon	1.07921e-13	2.09324	0.034	0.008	1.65217e-09	CD4 Trm	Selenon
Lamtor1	1.19295e-13	0.370187	0.294	0.225	1.82628e-09	CD4 Trm	Lamtor1
Syne1	1.20335e-13	0.732265	0.118	0.071	1.84221e-09	CD4 Trm	Syne1
Ctnnbip1	1.25995e-13	1.69279	0.04	0.012	1.92885e-09	CD4 Trm	Ctnnbip1
Chmp1b	1.33415e-13	0.411922	0.277	0.21	2.04245e-09	CD4 Trm	Chmp1b
Nfatc3	1.44109e-13	0.337008	0.336	0.265	2.20616e-09	CD4 Trm	Nfatc3
Tbc1d10b	1.4637e-13	0.933266	0.082	0.043	2.24079e-09	CD4 Trm	Tbc1d10b
Retreg3	1.50729e-13	0.892404	0.093	0.051	2.30752e-09	CD4 Trm	Retreg3
Ccnd2	1.53609e-13	0.266347	0.527	0.455	2.3516e-09	CD4 Trm	Ccnd2
Foxp1	1.56066e-13	0.386169	0.314	0.245	2.38921e-09	CD4 Trm	Foxp1
Pfdn1	1.56318e-13	0.586419	0.166	0.111	2.39307e-09	CD4 Trm	Pfdn1
Tomm5	1.56708e-13	0.503062	0.199	0.14	2.39904e-09	CD4 Trm	Tomm5
Nsa2	1.80294e-13	0.276546	0.512	0.439	2.76012e-09	CD4 Trm	Nsa2
Idh3a	1.81141e-13	0.618339	0.145	0.094	2.77309e-09	CD4 Trm	Idh3a
Aimp1	1.8835e-13	0.431638	0.243	0.179	2.88345e-09	CD4 Trm	Aimp1
Cox7a2	1.90503e-13	0.257679	0.506	0.429	2.9164e-09	CD4 Trm	Cox7a2
Znrf2	1.95666e-13	0.587947	0.163	0.109	2.99545e-09	CD4 Trm	Znrf2
Pdcd4	1.96388e-13	0.321044	0.451	0.38	3.0065e-09	CD4 Trm	Pdcd4
Sgk3	1.97273e-13	3.1144	0.023	0.003	3.02005e-09	CD4 Trm	Sgk3
Actr1b	1.97401e-13	0.524079	0.187	0.13	3.02201e-09	CD4 Trm	Actr1b
Arsb	2.00195e-13	1.14802	0.067	0.031	3.06478e-09	CD4 Trm	Arsb
Ube2v2	2.00705e-13	0.713076	0.137	0.088	3.07259e-09	CD4 Trm	Ube2v2
Prkd2	2.22415e-13	0.595913	0.157	0.104	3.40495e-09	CD4 Trm	Prkd2
Serpina3f	2.27922e-13	1.65445	0.039	0.012	3.48926e-09	CD4 Trm	Serpina3f
Bscl2	2.30147e-13	0.477182	0.234	0.172	3.52333e-09	CD4 Trm	Bscl2
Commd7	2.32253e-13	0.442515	0.267	0.203	3.55556e-09	CD4 Trm	Commd7
Npc2	2.36159e-13	0.258678	0.618	0.56	3.61536e-09	CD4 Trm	Npc2
Rbm3	2.37485e-13	0.173278	0.799	0.745	3.63566e-09	CD4 Trm	Rbm3
Malt1	2.44805e-13	0.263494	0.397	0.321	3.74772e-09	CD4 Trm	Malt1
Lsm4	2.50048e-13	0.368222	0.334	0.265	3.82799e-09	CD4 Trm	Lsm4
AI413582	2.66942e-13	0.420814	0.241	0.178	4.08661e-09	CD4 Trm	AI413582
Ssr2	2.74302e-13	0.484321	0.23	0.169	4.1993e-09	CD4 Trm	Ssr2
Zfp251	2.81768e-13	1.64879	0.043	0.014	4.31358e-09	CD4 Trm	Zfp251
Pltp	2.92174e-13	3.02752	0.022	0.002	4.4729e-09	CD4 Trm	Pltp
Inpp5d	2.95959e-13	0.339026	0.396	0.324	4.53083e-09	CD4 Trm	Inpp5d
Maea	3.24067e-13	0.576757	0.164	0.11	4.96114e-09	CD4 Trm	Maea
Nedd4	3.58883e-13	0.955088	0.095	0.053	5.49414e-09	CD4 Trm	Nedd4
Rmdn2	3.59966e-13	1.07543	0.071	0.035	5.51073e-09	CD4 Trm	Rmdn2
Nin	3.65677e-13	0.463463	0.209	0.149	5.59815e-09	CD4 Trm	Nin
Uggt1	3.66935e-13	0.785909	0.105	0.061	5.6174e-09	CD4 Trm	Uggt1
Agfg1	3.74683e-13	0.248596	0.486	0.408	5.73602e-09	CD4 Trm	Agfg1
Dynll1	4.01682e-13	0.273301	0.472	0.395	6.14935e-09	CD4 Trm	Dynll1
Yeats4	4.11668e-13	0.484955	0.22	0.16	6.30222e-09	CD4 Trm	Yeats4
Exosc4	4.16879e-13	1.12313	0.069	0.033	6.38201e-09	CD4 Trm	Exosc4
Irak2	4.20295e-13	0.521868	0.192	0.135	6.4343e-09	CD4 Trm	Irak2
9330111N05Rik	4.30257e-13	0.565408	0.172	0.118	6.58681e-09	CD4 Trm	9330111N05Rik
Srsf3	4.38929e-13	0.225981	0.653	0.583	6.71956e-09	CD4 Trm	Srsf3
Tap1	4.44034e-13	0.307763	0.4	0.329	6.79772e-09	CD4 Trm	Tap1
Selenoh	4.60778e-13	0.580527	0.158	0.105	7.05405e-09	CD4 Trm	Selenoh
Ndrg3	4.68469e-13	0.658557	0.125	0.078	7.17179e-09	CD4 Trm	Ndrg3
Eif1b	4.75067e-13	0.475917	0.187	0.13	7.2728e-09	CD4 Trm	Eif1b
Phf5a	4.79483e-13	0.500783	0.221	0.162	7.34041e-09	CD4 Trm	Phf5a
Itpa	4.8192e-13	0.685152	0.129	0.081	7.37771e-09	CD4 Trm	Itpa
Ramac	5.07406e-13	0.313684	0.394	0.323	7.76788e-09	CD4 Trm	Ramac
Hmgcs1	5.23433e-13	0.592649	0.156	0.104	8.01323e-09	CD4 Trm	Hmgcs1
Zfp683	5.37605e-13	4.35738	0.019	0.001	8.2302e-09	CD4 Trm	Zfp683
2025-09-09	5.46298e-13	0.275855	0.423	0.35	8.36327e-09	CD4 Trm	2025-09-09
Eif4ebp2	5.51123e-13	0.362427	0.35	0.283	8.43715e-09	CD4 Trm	Eif4ebp2
Slk	5.53016e-13	0.324315	0.409	0.34	8.46611e-09	CD4 Trm	Slk
Rbm17	5.7054e-13	0.387513	0.266	0.201	8.7344e-09	CD4 Trm	Rbm17
Ifit2	5.78916e-13	1.64689	0.046	0.017	8.86262e-09	CD4 Trm	Ifit2
Gm30211	5.8578e-13	1.33801	0.153	0.104	8.96771e-09	CD4 Trm	Gm30211
Tiprl	5.99854e-13	0.357478	0.296	0.228	9.18316e-09	CD4 Trm	Tiprl
Snhg1	6.01505e-13	0.402478	0.288	0.223	9.20844e-09	CD4 Trm	Snhg1
Xrn2	6.03658e-13	0.332859	0.372	0.302	9.24141e-09	CD4 Trm	Xrn2
Nosip	6.04347e-13	0.551034	0.166	0.112	9.25194e-09	CD4 Trm	Nosip
Cuta	6.16378e-13	0.454624	0.231	0.17	9.43613e-09	CD4 Trm	Cuta
Rps15	6.31297e-13	0.116177	0.985	0.974	9.66452e-09	CD4 Trm	Rps15
Abtb2	6.48986e-13	0.900977	0.084	0.045	9.93533e-09	CD4 Trm	Abtb2
Sumo1	6.57312e-13	0.26559	0.48	0.407	1.00628e-08	CD4 Trm	Sumo1
Hnrnpf	7.13791e-13	0.196639	0.723	0.658	1.09274e-08	CD4 Trm	Hnrnpf
Mfng	7.42404e-13	0.659141	0.14	0.091	1.13655e-08	CD4 Trm	Mfng
Borcs8	7.43197e-13	0.553913	0.181	0.126	1.13776e-08	CD4 Trm	Borcs8
Gm47015	7.48077e-13	1.03268	0.072	0.036	1.14523e-08	CD4 Trm	Gm47015
Zkscan14	7.50444e-13	0.941224	0.085	0.046	1.14885e-08	CD4 Trm	Zkscan14
Ppil4	7.55579e-13	0.437369	0.231	0.171	1.15672e-08	CD4 Trm	Ppil4
Mitd1	7.72538e-13	0.733051	0.105	0.061	1.18268e-08	CD4 Trm	Mitd1
Arhgdia	7.80037e-13	0.244537	0.467	0.39	1.19416e-08	CD4 Trm	Arhgdia
Gpr174	8.20324e-13	0.498452	0.19	0.133	1.25583e-08	CD4 Trm	Gpr174
Eya2	9.4309e-13	1.01934	0.061	0.028	1.44378e-08	CD4 Trm	Eya2
Rfxap	9.766e-13	0.603217	0.148	0.097	1.49508e-08	CD4 Trm	Rfxap
Wdr1	1.00381e-12	0.360679	0.375	0.309	1.53673e-08	CD4 Trm	Wdr1
Mxd1	1.05545e-12	0.292528	0.492	0.422	1.61579e-08	CD4 Trm	Mxd1
Igha	1.0901e-12	1.20253	0.571	0.522	1.66883e-08	CD4 Trm	Igha
Rcc1l	1.11325e-12	1.12187	0.062	0.029	1.70428e-08	CD4 Trm	Rcc1l
Rbm5	1.1529e-12	0.39193	0.261	0.198	1.76498e-08	CD4 Trm	Rbm5
Ldb1	1.17375e-12	0.281198	0.379	0.306	1.79689e-08	CD4 Trm	Ldb1
Oas1a	1.19393e-12	0.873478	0.091	0.051	1.82778e-08	CD4 Trm	Oas1a
Zup1	1.19686e-12	0.477198	0.206	0.148	1.83228e-08	CD4 Trm	Zup1
Bcl11b	1.19922e-12	0.337901	0.374	0.306	1.83588e-08	CD4 Trm	Bcl11b
Atg101	1.20031e-12	0.501074	0.178	0.123	1.83755e-08	CD4 Trm	Atg101
Pmvk	1.2374e-12	0.995247	0.063	0.03	1.89433e-08	CD4 Trm	Pmvk
Cd68	1.27921e-12	1.63036	0.041	0.014	1.95835e-08	CD4 Trm	Cd68
Cacybp	1.37394e-12	0.436815	0.208	0.149	2.10337e-08	CD4 Trm	Cacybp
Cnot6l	1.41201e-12	0.23163	0.51	0.438	2.16165e-08	CD4 Trm	Cnot6l
Pdlim2	1.51444e-12	0.670745	0.137	0.089	2.31846e-08	CD4 Trm	Pdlim2
Uqcr10	1.57193e-12	0.246136	0.413	0.334	2.40647e-08	CD4 Trm	Uqcr10
Lgals3bp	1.57501e-12	0.561211	0.157	0.106	2.41118e-08	CD4 Trm	Lgals3bp
Abcg3	1.62502e-12	1.53976	0.042	0.015	2.48774e-08	CD4 Trm	Abcg3
Atp5k	1.6347e-12	0.415276	0.255	0.193	2.50256e-08	CD4 Trm	Atp5k
Cs	1.72587e-12	0.466427	0.224	0.166	2.64213e-08	CD4 Trm	Cs
Phtf1	1.80092e-12	0.571299	0.142	0.093	2.75703e-08	CD4 Trm	Phtf1
Btg1	1.8417e-12	0.118166	0.975	0.97	2.81946e-08	CD4 Trm	Btg1
Bub3	1.86647e-12	0.520224	0.181	0.128	2.85738e-08	CD4 Trm	Bub3
Gars	1.86758e-12	0.516341	0.153	0.102	2.85909e-08	CD4 Trm	Gars
Brd7	1.87908e-12	0.694192	0.134	0.087	2.87668e-08	CD4 Trm	Brd7
Rbm18	1.95374e-12	0.527053	0.161	0.109	2.99099e-08	CD4 Trm	Rbm18
Dhx8	1.97604e-12	0.610563	0.145	0.096	3.02512e-08	CD4 Trm	Dhx8
Tsr3	2.00538e-12	1.05831	0.068	0.034	3.07004e-08	CD4 Trm	Tsr3
Scrn3	2.0165e-12	1.96815	0.03	0.007	3.08706e-08	CD4 Trm	Scrn3
Ppip5k2	2.08146e-12	0.695417	0.112	0.068	3.1865e-08	CD4 Trm	Ppip5k2
Lsm1	2.09175e-12	0.559901	0.166	0.114	3.20225e-08	CD4 Trm	Lsm1
Ccdc25	2.15387e-12	0.742108	0.109	0.066	3.29736e-08	CD4 Trm	Ccdc25
Smdt1	2.23542e-12	0.275395	0.369	0.296	3.4222e-08	CD4 Trm	Smdt1
Naa60	2.32311e-12	0.547895	0.155	0.104	3.55644e-08	CD4 Trm	Naa60
Nptn	2.33787e-12	0.45924	0.228	0.169	3.57904e-08	CD4 Trm	Nptn
Rfx7	2.44454e-12	0.560119	0.159	0.108	3.74234e-08	CD4 Trm	Rfx7
Syf2	2.4647e-12	0.260585	0.472	0.401	3.77321e-08	CD4 Trm	Syf2
Commd6	2.49254e-12	0.524153	0.16	0.109	3.81583e-08	CD4 Trm	Commd6
Ago2	2.55749e-12	0.345882	0.364	0.297	3.91526e-08	CD4 Trm	Ago2
Ptpn12	2.63872e-12	0.897458	0.08	0.043	4.03961e-08	CD4 Trm	Ptpn12
Daxx	2.68489e-12	0.735708	0.116	0.072	4.1103e-08	CD4 Trm	Daxx
Nans	2.68646e-12	0.607831	0.141	0.093	4.11271e-08	CD4 Trm	Nans
Pdha1	2.85357e-12	0.41312	0.232	0.171	4.36853e-08	CD4 Trm	Pdha1
Spice1	2.87234e-12	1.5082	0.044	0.016	4.39726e-08	CD4 Trm	Spice1
Tma7	2.93042e-12	0.234812	0.557	0.488	4.48618e-08	CD4 Trm	Tma7
Card6	3.04652e-12	0.917133	0.066	0.032	4.66392e-08	CD4 Trm	Card6
Tlk1	3.10896e-12	0.342643	0.319	0.253	4.75951e-08	CD4 Trm	Tlk1
Cdkn2aipnl	3.23912e-12	0.585123	0.157	0.107	4.95876e-08	CD4 Trm	Cdkn2aipnl
Btbd19	3.51178e-12	1.04932	0.064	0.031	5.37618e-08	CD4 Trm	Btbd19
Frat2	3.53327e-12	0.379746	0.235	0.175	5.40909e-08	CD4 Trm	Frat2
Dynlrb1	3.53442e-12	0.242913	0.464	0.387	5.41085e-08	CD4 Trm	Dynlrb1
Ssu72	3.78303e-12	0.287113	0.365	0.295	5.79145e-08	CD4 Trm	Ssu72
Tmed5	3.83882e-12	0.301	0.387	0.319	5.87684e-08	CD4 Trm	Tmed5
Camk2g	4.07177e-12	0.588735	0.141	0.093	6.23348e-08	CD4 Trm	Camk2g
Zfand2a	4.086e-12	1.22126	0.052	0.022	6.25526e-08	CD4 Trm	Zfand2a
Runx3	4.30452e-12	0.222823	0.338	0.265	6.58979e-08	CD4 Trm	Runx3
Slc39a6	4.31297e-12	0.724425	0.101	0.059	6.60273e-08	CD4 Trm	Slc39a6
Csnk1g2	4.38352e-12	0.379332	0.279	0.217	6.71072e-08	CD4 Trm	Csnk1g2
Trir	4.50758e-12	0.303402	0.383	0.316	6.90065e-08	CD4 Trm	Trir
Map1lc3b	4.71534e-12	0.181243	0.71	0.658	7.21872e-08	CD4 Trm	Map1lc3b
Surf1	4.92181e-12	0.558982	0.154	0.104	7.53479e-08	CD4 Trm	Surf1
Qsox1	4.93102e-12	0.690229	0.105	0.063	7.54891e-08	CD4 Trm	Qsox1
Tnks2	5.47274e-12	0.279311	0.433	0.363	8.37822e-08	CD4 Trm	Tnks2
Tet3	5.54487e-12	0.660349	0.127	0.081	8.48865e-08	CD4 Trm	Tet3
Calm3	5.75438e-12	0.350985	0.295	0.231	8.80939e-08	CD4 Trm	Calm3
Dock10	5.80506e-12	0.26475	0.555	0.483	8.88696e-08	CD4 Trm	Dock10
Pgap1	5.92763e-12	1.11707	0.061	0.029	9.0746e-08	CD4 Trm	Pgap1
Mical2	5.94217e-12	3.42693	0.019	0.002	9.09686e-08	CD4 Trm	Mical2
Rpl35	6.01742e-12	0.143189	0.812	0.746	9.21206e-08	CD4 Trm	Rpl35
Trac	6.266e-12	0.128525	0.962	0.939	9.59262e-08	CD4 Trm	Trac
Srp68	6.35975e-12	0.749482	0.108	0.066	9.73615e-08	CD4 Trm	Srp68
Gdf11	6.43569e-12	1.14983	0.055	0.024	9.8524e-08	CD4 Trm	Gdf11
Parp10	6.45065e-12	0.703067	0.107	0.065	9.8753e-08	CD4 Trm	Parp10
Dcaf5	6.66569e-12	0.61335	0.138	0.091	1.02045e-07	CD4 Trm	Dcaf5
Nono	6.75675e-12	0.285743	0.406	0.338	1.03439e-07	CD4 Trm	Nono
Sf3b4	6.78854e-12	0.375797	0.279	0.217	1.03926e-07	CD4 Trm	Sf3b4
Ak2	7.12483e-12	0.339826	0.272	0.208	1.09074e-07	CD4 Trm	Ak2
Dock2	7.1404e-12	0.272919	0.455	0.384	1.09312e-07	CD4 Trm	Dock2
Atad2	7.18346e-12	0.592609	0.15	0.101	1.09972e-07	CD4 Trm	Atad2
A930001A20Rik	7.19286e-12	2.87053	0.02	0.002	1.10116e-07	CD4 Trm	A930001A20Rik
Frmd8	7.44141e-12	0.512575	0.174	0.122	1.1392e-07	CD4 Trm	Frmd8
Ufc1	7.6354e-12	0.424883	0.246	0.187	1.1689e-07	CD4 Trm	Ufc1
Nmrk1	7.64841e-12	0.846896	0.078	0.042	1.1709e-07	CD4 Trm	Nmrk1
Stard4	7.74603e-12	0.459934	0.173	0.12	1.18584e-07	CD4 Trm	Stard4
Rit1	7.93926e-12	0.841855	0.083	0.046	1.21542e-07	CD4 Trm	Rit1
Cyb5r4	8.30005e-12	0.432919	0.196	0.141	1.27065e-07	CD4 Trm	Cyb5r4
Chmp1a	8.31904e-12	0.511523	0.177	0.125	1.27356e-07	CD4 Trm	Chmp1a
Zfp874b	8.52315e-12	0.797923	0.082	0.045	1.30481e-07	CD4 Trm	Zfp874b
Ptp4a3	8.73889e-12	0.663471	0.141	0.095	1.33784e-07	CD4 Trm	Ptp4a3
Cdk5rap3	8.84884e-12	0.705696	0.113	0.07	1.35467e-07	CD4 Trm	Cdk5rap3
Atg2a	8.90059e-12	0.634535	0.147	0.1	1.36259e-07	CD4 Trm	Atg2a
Vps13a	9.03295e-12	0.58668	0.134	0.088	1.38285e-07	CD4 Trm	Vps13a
Sap30	9.25978e-12	0.909656	0.075	0.04	1.41758e-07	CD4 Trm	Sap30
Irf2bpl	9.80962e-12	0.557795	0.149	0.1	1.50175e-07	CD4 Trm	Irf2bpl
Timm10b	9.92991e-12	0.520035	0.188	0.135	1.52017e-07	CD4 Trm	Timm10b
Bfar	1.02348e-11	0.84761	0.082	0.045	1.56685e-07	CD4 Trm	Bfar
Rbck1	1.04865e-11	0.414006	0.229	0.17	1.60539e-07	CD4 Trm	Rbck1
Ndufa9	1.07648e-11	0.527291	0.174	0.122	1.64798e-07	CD4 Trm	Ndufa9
Fcrl1	1.09013e-11	0.989648	0.066	0.033	1.66888e-07	CD4 Trm	Fcrl1
Gm7030	1.10018e-11	0.600033	0.131	0.085	1.68427e-07	CD4 Trm	Gm7030
Trib2	1.12711e-11	0.501689	0.149	0.1	1.7255e-07	CD4 Trm	Trib2
Pomp	1.17755e-11	0.278966	0.372	0.305	1.80271e-07	CD4 Trm	Pomp
Mbd2	1.20905e-11	0.270125	0.464	0.397	1.85093e-07	CD4 Trm	Mbd2
Kif21b	1.26426e-11	0.457971	0.212	0.156	1.93545e-07	CD4 Trm	Kif21b
Hnrnpa2b1	1.26793e-11	0.125991	0.946	0.929	1.94108e-07	CD4 Trm	Hnrnpa2b1
Eif2b2	1.3014e-11	0.638748	0.122	0.078	1.99231e-07	CD4 Trm	Eif2b2
Gm33104	1.3151e-11	0.659252	0.118	0.075	2.01329e-07	CD4 Trm	Gm33104
Gnai2	1.36199e-11	0.168995	0.854	0.814	2.08507e-07	CD4 Trm	Gnai2
Rtf1	1.40659e-11	0.391706	0.266	0.205	2.15335e-07	CD4 Trm	Rtf1
Mff	1.41416e-11	0.375297	0.241	0.182	2.16494e-07	CD4 Trm	Mff
Vcpip1	1.45112e-11	0.495423	0.182	0.131	2.22153e-07	CD4 Trm	Vcpip1
Pdcd10	1.45913e-11	0.291453	0.385	0.317	2.23378e-07	CD4 Trm	Pdcd10
Mrpl20	1.50439e-11	0.392516	0.214	0.157	2.30307e-07	CD4 Trm	Mrpl20
Dnajc7	1.59196e-11	0.321975	0.318	0.254	2.43712e-07	CD4 Trm	Dnajc7
Cyfip2	1.60719e-11	0.261302	0.381	0.31	2.46045e-07	CD4 Trm	Cyfip2
Kxd1	1.62492e-11	0.432168	0.241	0.184	2.48759e-07	CD4 Trm	Kxd1
Ube2d1	1.63843e-11	0.740001	0.105	0.064	2.50827e-07	CD4 Trm	Ube2d1
Zfp654	1.66423e-11	0.646533	0.126	0.082	2.54776e-07	CD4 Trm	Zfp654
Ggct	1.73801e-11	0.910619	0.068	0.035	2.66072e-07	CD4 Trm	Ggct
Agpat3	1.74283e-11	0.428064	0.219	0.163	2.6681e-07	CD4 Trm	Agpat3
Golm1	1.76839e-11	0.782856	0.099	0.06	2.70722e-07	CD4 Trm	Golm1
Carhsp1	1.77866e-11	0.674102	0.107	0.065	2.72295e-07	CD4 Trm	Carhsp1
Trerf1	1.78052e-11	0.754155	0.103	0.063	2.7258e-07	CD4 Trm	Trerf1
Mocs2	1.78611e-11	0.66846	0.103	0.063	2.73436e-07	CD4 Trm	Mocs2
Tacc1	1.85413e-11	0.365989	0.262	0.201	2.83848e-07	CD4 Trm	Tacc1
Aopep	1.86214e-11	0.254184	0.365	0.294	2.85076e-07	CD4 Trm	Aopep
Slc25a40	1.92691e-11	0.92503	0.086	0.049	2.94991e-07	CD4 Trm	Slc25a40
Fancf	2.07151e-11	0.911961	0.068	0.035	3.17128e-07	CD4 Trm	Fancf
Vav1	2.28085e-11	0.52093	0.16	0.111	3.49175e-07	CD4 Trm	Vav1
Ndufa8	2.36763e-11	0.368161	0.237	0.179	3.6246e-07	CD4 Trm	Ndufa8
Mgat4a	2.47984e-11	1.07513	0.055	0.026	3.79639e-07	CD4 Trm	Mgat4a
Raly	2.56071e-11	0.232966	0.476	0.404	3.9202e-07	CD4 Trm	Raly
Txk	2.59106e-11	0.754675	0.158	0.111	3.96665e-07	CD4 Trm	Txk
Parp9	2.59598e-11	0.495486	0.151	0.103	3.97418e-07	CD4 Trm	Parp9
Nsmce1	2.62108e-11	0.413717	0.201	0.147	4.01262e-07	CD4 Trm	Nsmce1
Mcts1	2.65108e-11	0.611034	0.148	0.101	4.05854e-07	CD4 Trm	Mcts1
Mta2	2.66714e-11	0.423288	0.255	0.197	4.08313e-07	CD4 Trm	Mta2
Trbv1	2.70317e-11	1.32629	0.038	0.014	4.13828e-07	CD4 Trm	Trbv1
Atp6v1a	2.73148e-11	0.489332	0.172	0.121	4.18163e-07	CD4 Trm	Atp6v1a
Hspa14	2.85237e-11	0.426824	0.187	0.134	4.3667e-07	CD4 Trm	Hspa14
Hnrnpdl	2.89496e-11	0.222166	0.584	0.522	4.4319e-07	CD4 Trm	Hnrnpdl
4833420G17Rik	2.95807e-11	0.366851	0.228	0.171	4.52851e-07	CD4 Trm	4833420G17Rik
Gm12840	2.98638e-11	0.507753	0.178	0.128	4.57184e-07	CD4 Trm	Gm12840
Bach2it1	3.06716e-11	2.58739	0.022	0.004	4.69551e-07	CD4 Trm	Bach2it1
Hp1bp3	3.32025e-11	0.253109	0.403	0.333	5.08297e-07	CD4 Trm	Hp1bp3
Prkcb	3.45446e-11	0.39631	0.219	0.163	5.28844e-07	CD4 Trm	Prkcb
Tmem50a	3.56395e-11	0.198699	0.565	0.494	5.45605e-07	CD4 Trm	Tmem50a
Kcnk5	3.64035e-11	1.64851	0.034	0.011	5.57301e-07	CD4 Trm	Kcnk5
Dgkd	3.65398e-11	0.529754	0.135	0.09	5.59388e-07	CD4 Trm	Dgkd
Acat1	3.87738e-11	0.519513	0.133	0.088	5.93589e-07	CD4 Trm	Acat1
Ndufb3	3.98878e-11	0.374529	0.272	0.212	6.10643e-07	CD4 Trm	Ndufb3
P2ry10	3.99831e-11	0.169267	0.65	0.579	6.12101e-07	CD4 Trm	P2ry10
Ssbp2	4.04014e-11	0.830375	0.076	0.042	6.18504e-07	CD4 Trm	Ssbp2
Isca1	4.04685e-11	0.519041	0.171	0.121	6.19532e-07	CD4 Trm	Isca1
Satb1	4.0712e-11	0.493364	0.266	0.21	6.2326e-07	CD4 Trm	Satb1
Copb1	4.10526e-11	0.313309	0.346	0.282	6.28474e-07	CD4 Trm	Copb1
Arrdc3	4.164e-11	0.936486	0.073	0.039	6.37467e-07	CD4 Trm	Arrdc3
Gps2	4.18644e-11	0.387459	0.241	0.184	6.40902e-07	CD4 Trm	Gps2
Cmas	4.20456e-11	0.26217	0.309	0.245	6.43676e-07	CD4 Trm	Cmas
Tnfsf14	4.267e-11	1.9065	0.03	0.009	6.53234e-07	CD4 Trm	Tnfsf14
Ifngas1	4.33405e-11	3.77242	0.017	0.001	6.635e-07	CD4 Trm	Ifngas1
Hist1h4d	4.53436e-11	1.06286	0.06	0.029	6.94166e-07	CD4 Trm	Hist1h4d
Ankrd11	4.68667e-11	0.21618	0.557	0.49	7.17482e-07	CD4 Trm	Ankrd11
Cd6	4.69537e-11	0.275667	0.466	0.4	7.18814e-07	CD4 Trm	Cd6
Eif4enif1	4.93262e-11	0.609032	0.115	0.073	7.55136e-07	CD4 Trm	Eif4enif1
Ccnq	5.10124e-11	0.741359	0.095	0.057	7.80949e-07	CD4 Trm	Ccnq
Ube2j2	5.21596e-11	0.271636	0.389	0.323	7.98511e-07	CD4 Trm	Ube2j2
Dctn4	5.26555e-11	0.423724	0.204	0.15	8.06104e-07	CD4 Trm	Dctn4
Ugp2	5.36676e-11	0.596815	0.17	0.121	8.21597e-07	CD4 Trm	Ugp2
Hdac5	5.36827e-11	1.24154	0.046	0.019	8.21828e-07	CD4 Trm	Hdac5
Uchl3	5.43639e-11	0.541432	0.15	0.104	8.32257e-07	CD4 Trm	Uchl3
Dpy19l1	5.60848e-11	1.2517	0.045	0.018	8.58603e-07	CD4 Trm	Dpy19l1
Zbtb11	5.7665e-11	0.575767	0.144	0.098	8.82794e-07	CD4 Trm	Zbtb11
Mindy2	5.79568e-11	0.553012	0.142	0.096	8.87261e-07	CD4 Trm	Mindy2
Atf4	5.83789e-11	0.236603	0.58	0.516	8.93722e-07	CD4 Trm	Atf4
Senp2	5.93375e-11	0.428783	0.206	0.152	9.08398e-07	CD4 Trm	Senp2
Trim30a	6.00578e-11	0.350293	0.285	0.226	9.19426e-07	CD4 Trm	Trim30a
Usf1	6.19675e-11	0.892569	0.068	0.036	9.4866e-07	CD4 Trm	Usf1
Psen1	6.31948e-11	0.534747	0.165	0.117	9.67449e-07	CD4 Trm	Psen1
Snhg6	6.4903e-11	0.383891	0.258	0.202	9.93601e-07	CD4 Trm	Snhg6
Tcrg-C2	6.63573e-11	1.24125	0.048	0.021	1.01586e-06	CD4 Trm	Tcrg-C2
Crim1	6.65214e-11	0.710948	0.09	0.053	1.01838e-06	CD4 Trm	Crim1
1700025G04Rik	6.72947e-11	2.32981	0.023	0.004	1.03021e-06	CD4 Trm	1700025G04Rik
Aph1a	6.83623e-11	0.425885	0.188	0.136	1.04656e-06	CD4 Trm	Aph1a
Rnf213	6.84248e-11	0.537979	0.16	0.112	1.04752e-06	CD4 Trm	Rnf213
Fnbp4	7.05134e-11	0.325428	0.305	0.244	1.07949e-06	CD4 Trm	Fnbp4
Eif4e2	7.0726e-11	0.309654	0.316	0.253	1.08274e-06	CD4 Trm	Eif4e2
Plekha2	7.08216e-11	0.525208	0.164	0.116	1.08421e-06	CD4 Trm	Plekha2
Gpd2	7.37971e-11	1.16438	0.051	0.023	1.12976e-06	CD4 Trm	Gpd2
Als2cl	7.47764e-11	1.49214	0.036	0.013	1.14475e-06	CD4 Trm	Als2cl
Lamtor2	7.52176e-11	0.341111	0.247	0.189	1.15151e-06	CD4 Trm	Lamtor2
Dock5	7.58649e-11	1.95613	0.03	0.009	1.16142e-06	CD4 Trm	Dock5
Lmnb1	7.9658e-11	0.257629	0.438	0.371	1.21948e-06	CD4 Trm	Lmnb1
Shld3	8.01459e-11	0.790972	0.085	0.049	1.22695e-06	CD4 Trm	Shld3
Msn	8.02427e-11	0.19815	0.626	0.559	1.22844e-06	CD4 Trm	Msn
Pik3cg	8.08528e-11	0.792115	0.083	0.048	1.23778e-06	CD4 Trm	Pik3cg
Tpp2	8.13112e-11	0.321383	0.332	0.27	1.24479e-06	CD4 Trm	Tpp2
Xdh	8.47765e-11	0.931805	0.07	0.038	1.29784e-06	CD4 Trm	Xdh
Ndufb10	8.65177e-11	0.405106	0.215	0.161	1.3245e-06	CD4 Trm	Ndufb10
Racgap1	8.69017e-11	0.76954	0.087	0.051	1.33038e-06	CD4 Trm	Racgap1
Znhit2	8.69058e-11	0.914686	0.062	0.032	1.33044e-06	CD4 Trm	Znhit2
Snrpb2	8.83594e-11	0.307616	0.318	0.255	1.35269e-06	CD4 Trm	Snrpb2
Prdm10	9.21747e-11	0.885722	0.071	0.038	1.4111e-06	CD4 Trm	Prdm10
Entpd1	9.23043e-11	0.841472	0.087	0.051	1.41309e-06	CD4 Trm	Entpd1
Dclre1c	9.47353e-11	1.05134	0.067	0.036	1.4503e-06	CD4 Trm	Dclre1c
Gatd3a	9.5209e-11	0.622397	0.115	0.074	1.45756e-06	CD4 Trm	Gatd3a
Ap3m2	9.69353e-11	1.00432	0.058	0.028	1.48398e-06	CD4 Trm	Ap3m2
Laptm5	9.69487e-11	0.12937	0.929	0.922	1.48419e-06	CD4 Trm	Laptm5
Sos2	1.02938e-10	0.71378	0.102	0.063	1.57588e-06	CD4 Trm	Sos2
Hsd11b1	1.05592e-10	0.651899	0.111	0.071	1.61651e-06	CD4 Trm	Hsd11b1
Cnot8	1.06736e-10	0.566578	0.135	0.091	1.63402e-06	CD4 Trm	Cnot8
Ube2i	1.08472e-10	0.2196	0.55	0.487	1.6606e-06	CD4 Trm	Ube2i
Atp6v0d1	1.10893e-10	0.416792	0.234	0.179	1.69766e-06	CD4 Trm	Atp6v0d1
Phf11c	1.11994e-10	0.854036	0.077	0.044	1.71452e-06	CD4 Trm	Phf11c
Zmym1	1.1584e-10	0.892528	0.069	0.037	1.7734e-06	CD4 Trm	Zmym1
Rabggtb	1.16765e-10	0.499568	0.154	0.108	1.78756e-06	CD4 Trm	Rabggtb
Txn2	1.195e-10	0.380916	0.262	0.205	1.82942e-06	CD4 Trm	Txn2
Nub1	1.22197e-10	0.330486	0.331	0.272	1.87072e-06	CD4 Trm	Nub1
Pmepa1	1.22832e-10	0.397822	0.256	0.201	1.88044e-06	CD4 Trm	Pmepa1
Ubap2	1.25831e-10	0.74336	0.101	0.063	1.92634e-06	CD4 Trm	Ubap2
Mrpl40	1.32276e-10	0.580315	0.125	0.082	2.02501e-06	CD4 Trm	Mrpl40
Oard1	1.35512e-10	0.681181	0.101	0.063	2.07456e-06	CD4 Trm	Oard1
Sema7a	1.36108e-10	2.72903	0.02	0.003	2.08368e-06	CD4 Trm	Sema7a
Prr5	1.4524e-10	1.5765	0.036	0.013	2.22349e-06	CD4 Trm	Prr5
Cbx1	1.45993e-10	0.428049	0.206	0.153	2.23501e-06	CD4 Trm	Cbx1
Trpc4ap	1.47113e-10	0.354856	0.283	0.227	2.25216e-06	CD4 Trm	Trpc4ap
Dock9	1.48446e-10	1.14964	0.049	0.022	2.27255e-06	CD4 Trm	Dock9
Cd53	1.49918e-10	0.152945	0.825	0.768	2.29509e-06	CD4 Trm	Cd53
Insig1	1.51074e-10	0.321295	0.275	0.215	2.3128e-06	CD4 Trm	Insig1
Ctdsp2	1.51276e-10	0.404595	0.209	0.156	2.31589e-06	CD4 Trm	Ctdsp2
Pak6	1.5842e-10	4.05462	0.015	0.001	2.42526e-06	CD4 Trm	Pak6
Dnttip1	1.61324e-10	0.481443	0.184	0.135	2.46971e-06	CD4 Trm	Dnttip1
Shld1	1.62125e-10	0.921957	0.077	0.044	2.48198e-06	CD4 Trm	Shld1
Mapk1ip1l	1.684e-10	0.440844	0.193	0.142	2.57803e-06	CD4 Trm	Mapk1ip1l
Gm20400	1.68854e-10	0.479115	0.17	0.122	2.58498e-06	CD4 Trm	Gm20400
Fbxo8	1.71454e-10	0.503126	0.13	0.087	2.62479e-06	CD4 Trm	Fbxo8
Azi2	1.73874e-10	0.346757	0.286	0.227	2.66184e-06	CD4 Trm	Azi2
Itch	1.74194e-10	0.516872	0.151	0.105	2.66673e-06	CD4 Trm	Itch
Herc3	1.78251e-10	0.767152	0.095	0.058	2.72884e-06	CD4 Trm	Herc3
Atg3	1.80867e-10	0.387258	0.231	0.177	2.76889e-06	CD4 Trm	Atg3
H2-Q4	1.84077e-10	0.210648	0.713	0.666	2.81804e-06	CD4 Trm	H2-Q4
Pxn	1.84502e-10	0.488234	0.173	0.124	2.82454e-06	CD4 Trm	Pxn
Pbrm1	1.93055e-10	0.342537	0.243	0.186	2.95548e-06	CD4 Trm	Pbrm1
Mcm2	1.93818e-10	0.804412	0.102	0.064	2.96716e-06	CD4 Trm	Mcm2
Atf1	1.9738e-10	0.415706	0.201	0.149	3.02169e-06	CD4 Trm	Atf1
Plcg1	1.99834e-10	0.538465	0.14	0.097	3.05926e-06	CD4 Trm	Plcg1
Nt5c3	2.00047e-10	0.490865	0.167	0.119	3.06251e-06	CD4 Trm	Nt5c3
Sft2d1	2.15827e-10	0.402712	0.227	0.173	3.3041e-06	CD4 Trm	Sft2d1
Sra1	2.16206e-10	0.324369	0.239	0.183	3.3099e-06	CD4 Trm	Sra1
Top2b	2.1761e-10	0.280256	0.343	0.28	3.3314e-06	CD4 Trm	Top2b
Hes6	2.18581e-10	0.693545	0.096	0.059	3.34626e-06	CD4 Trm	Hes6
Psmg2	2.18769e-10	0.667494	0.098	0.061	3.34914e-06	CD4 Trm	Psmg2
Phb2	2.21471e-10	0.310226	0.311	0.251	3.3905e-06	CD4 Trm	Phb2
Nbn	2.33531e-10	0.763778	0.073	0.041	3.57513e-06	CD4 Trm	Nbn
Trim36	2.40592e-10	1.32446	0.041	0.016	3.68322e-06	CD4 Trm	Trim36
Npm3	2.48318e-10	0.400625	0.211	0.159	3.80151e-06	CD4 Trm	Npm3
Zadh2	2.57629e-10	1.19441	0.047	0.021	3.94404e-06	CD4 Trm	Zadh2
Pop5	2.64332e-10	0.388046	0.213	0.16	4.04665e-06	CD4 Trm	Pop5
Ccng2	2.68314e-10	0.473716	0.162	0.115	4.10762e-06	CD4 Trm	Ccng2
Lgals9	2.72231e-10	0.294169	0.336	0.275	4.16758e-06	CD4 Trm	Lgals9
Snrnp27	2.75135e-10	0.582689	0.14	0.096	4.21205e-06	CD4 Trm	Snrnp27
Carnmt1	2.82754e-10	0.427598	0.167	0.119	4.32867e-06	CD4 Trm	Carnmt1
Galnt9	2.84354e-10	1.23292	0.04	0.016	4.35318e-06	CD4 Trm	Galnt9
Grina	2.87029e-10	0.361319	0.232	0.177	4.39413e-06	CD4 Trm	Grina
Lias	2.8716e-10	0.729451	0.089	0.053	4.39614e-06	CD4 Trm	Lias
Ndufv3	2.93852e-10	0.284631	0.369	0.306	4.49857e-06	CD4 Trm	Ndufv3
Gfi1	2.99158e-10	0.804304	0.063	0.033	4.57981e-06	CD4 Trm	Gfi1
Polr2m	3.00551e-10	0.322448	0.289	0.23	4.60113e-06	CD4 Trm	Polr2m
Ilk	3.02313e-10	0.472397	0.184	0.135	4.62812e-06	CD4 Trm	Ilk
Atp5e	3.07803e-10	0.197836	0.61	0.547	4.71216e-06	CD4 Trm	Atp5e
Inpp4a	3.14517e-10	0.706314	0.086	0.051	4.81495e-06	CD4 Trm	Inpp4a
Samd3	3.20513e-10	2.90289	0.019	0.003	4.90674e-06	CD4 Trm	Samd3
2510002D24Rik	3.27182e-10	0.527283	0.123	0.082	5.00883e-06	CD4 Trm	2510002D24Rik
Kdm5a	3.32776e-10	0.307444	0.323	0.264	5.09447e-06	CD4 Trm	Kdm5a
Clic1	3.36524e-10	0.199972	0.648	0.592	5.15184e-06	CD4 Trm	Clic1
Pcbp1	3.47674e-10	0.201809	0.543	0.476	5.32255e-06	CD4 Trm	Pcbp1
Ccdc115	3.63759e-10	0.693312	0.086	0.051	5.56878e-06	CD4 Trm	Ccdc115
Inpp4b	3.64179e-10	0.216208	0.531	0.462	5.57522e-06	CD4 Trm	Inpp4b
Cbx8	3.80395e-10	1.10169	0.05	0.023	5.82347e-06	CD4 Trm	Cbx8
Mrpl27	3.87516e-10	0.623115	0.099	0.062	5.93249e-06	CD4 Trm	Mrpl27
Ttc1	3.89688e-10	0.501568	0.15	0.105	5.96573e-06	CD4 Trm	Ttc1
Sult2b1	3.94584e-10	1.25611	0.039	0.015	6.04069e-06	CD4 Trm	Sult2b1
Ngdn	4.04841e-10	0.344128	0.253	0.197	6.19771e-06	CD4 Trm	Ngdn
Igf2bp2	4.07493e-10	3.63224	0.015	0.001	6.23831e-06	CD4 Trm	Igf2bp2
Atp5b	4.17017e-10	0.161542	0.695	0.64	6.38412e-06	CD4 Trm	Atp5b
Dnajb11	4.19164e-10	0.340553	0.272	0.216	6.41699e-06	CD4 Trm	Dnajb11
Smim11	4.24421e-10	0.394949	0.215	0.163	6.49746e-06	CD4 Trm	Smim11
Eif2a	4.42631e-10	0.525468	0.141	0.098	6.77624e-06	CD4 Trm	Eif2a
H2-T23	4.45347e-10	0.149847	0.704	0.64	6.81782e-06	CD4 Trm	H2-T23
Pdlim5	4.4824e-10	0.724703	0.09	0.054	6.86211e-06	CD4 Trm	Pdlim5
Zfp740	4.48944e-10	0.521371	0.156	0.111	6.87288e-06	CD4 Trm	Zfp740
Ppig	4.54151e-10	0.340302	0.312	0.255	6.9526e-06	CD4 Trm	Ppig
Taf15	4.6794e-10	0.378154	0.245	0.191	7.1637e-06	CD4 Trm	Taf15
Spsb1	4.6806e-10	1.23185	0.043	0.019	7.16553e-06	CD4 Trm	Spsb1
Pkn2	4.77979e-10	0.313728	0.242	0.186	7.31738e-06	CD4 Trm	Pkn2
Ggt5	4.94136e-10	2.62042	0.019	0.003	7.56472e-06	CD4 Trm	Ggt5
Sdhd	5.02876e-10	0.446593	0.187	0.138	7.69853e-06	CD4 Trm	Sdhd
Fbxo32	5.12018e-10	0.480034	0.12	0.079	7.83848e-06	CD4 Trm	Fbxo32
Slc38a2	5.21157e-10	0.208417	0.519	0.453	7.97839e-06	CD4 Trm	Slc38a2
Agfg2	5.22836e-10	0.880764	0.066	0.036	8.0041e-06	CD4 Trm	Agfg2
Mien1	5.35619e-10	0.325334	0.293	0.236	8.19979e-06	CD4 Trm	Mien1
Gimap1os	5.42303e-10	0.869284	0.069	0.038	8.30211e-06	CD4 Trm	Gimap1os
Ensa	5.48473e-10	0.363782	0.22	0.167	8.39657e-06	CD4 Trm	Ensa
Magoh	5.57434e-10	0.271831	0.367	0.305	8.53376e-06	CD4 Trm	Magoh
Stard3nl	5.80126e-10	0.533152	0.153	0.109	8.88115e-06	CD4 Trm	Stard3nl
Tars	5.81117e-10	0.509289	0.133	0.091	8.89632e-06	CD4 Trm	Tars
Cmpk1	5.83344e-10	0.317177	0.272	0.216	8.93041e-06	CD4 Trm	Cmpk1
Ptk2b	5.96546e-10	0.225825	0.451	0.386	9.13252e-06	CD4 Trm	Ptk2b
Zbtb16	5.97262e-10	1.70241	0.035	0.013	9.14349e-06	CD4 Trm	Zbtb16
Lypla2	5.9731e-10	0.341874	0.282	0.226	9.14421e-06	CD4 Trm	Lypla2
Wdr82	5.9748e-10	0.584508	0.12	0.08	9.14682e-06	CD4 Trm	Wdr82
Tpr	5.99716e-10	0.200857	0.611	0.543	9.18106e-06	CD4 Trm	Tpr
Cdyl2	6.00105e-10	1.24487	0.038	0.015	9.18701e-06	CD4 Trm	Cdyl2
Gpbp1l1	6.34116e-10	0.379746	0.239	0.187	9.70768e-06	CD4 Trm	Gpbp1l1
Naca	6.41444e-10	0.143298	0.853	0.801	9.81986e-06	CD4 Trm	Naca
Brd9	6.42513e-10	0.566428	0.118	0.079	9.83624e-06	CD4 Trm	Brd9
Rchy1	6.44585e-10	0.420854	0.184	0.136	9.86795e-06	CD4 Trm	Rchy1
Ccnk	6.51003e-10	0.337597	0.22	0.167	9.96621e-06	CD4 Trm	Ccnk
Ttc9c	6.63811e-10	0.636295	0.105	0.068	1.01623e-05	CD4 Trm	Ttc9c
Cops5	6.65369e-10	0.595544	0.137	0.095	1.01861e-05	CD4 Trm	Cops5
Psma4	6.76665e-10	0.29392	0.339	0.278	1.03591e-05	CD4 Trm	Psma4
Sbno1	7.03036e-10	0.366105	0.296	0.24	1.07628e-05	CD4 Trm	Sbno1
Sap30l	7.15547e-10	0.52366	0.13	0.089	1.09543e-05	CD4 Trm	Sap30l
Tef	7.4167e-10	0.897778	0.056	0.029	1.13542e-05	CD4 Trm	Tef
Mdp1	7.54782e-10	0.428007	0.173	0.126	1.1555e-05	CD4 Trm	Mdp1
Ube2f	7.61043e-10	0.47729	0.161	0.116	1.16508e-05	CD4 Trm	Ube2f
Hsdl2	7.6134e-10	0.828157	0.066	0.036	1.16553e-05	CD4 Trm	Hsdl2
Ahr	7.65209e-10	0.668134	0.137	0.096	1.17146e-05	CD4 Trm	Ahr
Ostc	7.92249e-10	0.263392	0.359	0.297	1.21285e-05	CD4 Trm	Ostc
1500011B03Rik	8.10656e-10	0.64713	0.109	0.071	1.24103e-05	CD4 Trm	1500011B03Rik
BC147527	8.12328e-10	2.16219	0.021	0.005	1.24359e-05	CD4 Trm	BC147527
Ppp2r5c	8.39042e-10	0.286839	0.395	0.334	1.28449e-05	CD4 Trm	Ppp2r5c
Ten1	8.61308e-10	0.517843	0.129	0.088	1.31858e-05	CD4 Trm	Ten1
Suds3	8.61442e-10	0.343694	0.239	0.185	1.31878e-05	CD4 Trm	Suds3
Pkp4	8.77035e-10	0.804007	0.079	0.047	1.34265e-05	CD4 Trm	Pkp4
Gm36723	8.91557e-10	0.807966	0.067	0.037	1.36489e-05	CD4 Trm	Gm36723
2210016L21Rik	8.91971e-10	0.633022	0.118	0.079	1.36552e-05	CD4 Trm	2210016L21Rik
Stim2	9.07475e-10	0.545186	0.122	0.082	1.38925e-05	CD4 Trm	Stim2
Rragc	9.15901e-10	0.57262	0.135	0.094	1.40215e-05	CD4 Trm	Rragc
Rars	9.18215e-10	0.551107	0.119	0.08	1.4057e-05	CD4 Trm	Rars
E2f4	9.27992e-10	0.374104	0.224	0.172	1.42066e-05	CD4 Trm	E2f4
Sgpp1	9.30834e-10	0.639796	0.097	0.061	1.42501e-05	CD4 Trm	Sgpp1
C1d	9.41778e-10	0.478318	0.153	0.109	1.44177e-05	CD4 Trm	C1d
Tmem106b	9.6969e-10	0.59843	0.123	0.084	1.4845e-05	CD4 Trm	Tmem106b
Cox7b	9.80691e-10	0.221449	0.47	0.404	1.50134e-05	CD4 Trm	Cox7b
Tcf3	9.88601e-10	0.571623	0.137	0.095	1.51345e-05	CD4 Trm	Tcf3
Stk16	1.00569e-09	0.703644	0.087	0.053	1.53961e-05	CD4 Trm	Stk16
5033430I15Rik	1.0406e-09	0.961407	0.055	0.028	1.59305e-05	CD4 Trm	5033430I15Rik
Crnkl1	1.09238e-09	0.432376	0.175	0.128	1.67232e-05	CD4 Trm	Crnkl1
Mcrip1	1.12139e-09	0.405552	0.174	0.127	1.71674e-05	CD4 Trm	Mcrip1
Iqgap1	1.13011e-09	0.243778	0.457	0.397	1.73009e-05	CD4 Trm	Iqgap1
Dlst	1.22501e-09	0.587877	0.126	0.086	1.87536e-05	CD4 Trm	Dlst
Pdrg1	1.24295e-09	0.610202	0.113	0.075	1.90284e-05	CD4 Trm	Pdrg1
Sgsh	1.2432e-09	1.17575	0.038	0.016	1.90321e-05	CD4 Trm	Sgsh
Pin1	1.28191e-09	0.443548	0.159	0.115	1.96247e-05	CD4 Trm	Pin1
Rasa1	1.28198e-09	0.449293	0.163	0.118	1.96259e-05	CD4 Trm	Rasa1
Ehd1	1.28623e-09	0.340253	0.317	0.262	1.96908e-05	CD4 Trm	Ehd1
Commd2	1.30525e-09	0.582465	0.12	0.081	1.99821e-05	CD4 Trm	Commd2
Fam122a	1.31321e-09	0.71869	0.077	0.045	2.0104e-05	CD4 Trm	Fam122a
Tbcel	1.34602e-09	0.571336	0.117	0.078	2.06062e-05	CD4 Trm	Tbcel
Nup50	1.36308e-09	0.42634	0.179	0.132	2.08674e-05	CD4 Trm	Nup50
Hdgf	1.36877e-09	0.363367	0.276	0.221	2.09546e-05	CD4 Trm	Hdgf
Rbx1	1.38398e-09	0.25656	0.408	0.35	2.11873e-05	CD4 Trm	Rbx1
Usp1	1.40801e-09	0.384185	0.194	0.145	2.15553e-05	CD4 Trm	Usp1
Kmt5a	1.4695e-09	0.450361	0.152	0.108	2.24966e-05	CD4 Trm	Kmt5a
Ddx47	1.48123e-09	0.341705	0.227	0.175	2.26762e-05	CD4 Trm	Ddx47
Nup210	1.50007e-09	0.619754	0.125	0.086	2.29646e-05	CD4 Trm	Nup210
Myd88	1.50302e-09	0.600632	0.118	0.079	2.30097e-05	CD4 Trm	Myd88
Plekha5	1.5077e-09	0.55331	0.146	0.104	2.30813e-05	CD4 Trm	Plekha5
1810030O07Rik	1.53509e-09	0.467285	0.144	0.101	2.35008e-05	CD4 Trm	1810030O07Rik
Got2	1.54399e-09	0.35222	0.217	0.165	2.36369e-05	CD4 Trm	Got2
Psmb4	1.60432e-09	0.242565	0.41	0.349	2.45606e-05	CD4 Trm	Psmb4
Gm29094	1.6522e-09	0.724196	0.087	0.053	2.52935e-05	CD4 Trm	Gm29094
Rhno1	1.68459e-09	0.64068	0.083	0.05	2.57894e-05	CD4 Trm	Rhno1
Rnf144a	1.7015e-09	0.851702	0.054	0.028	2.60483e-05	CD4 Trm	Rnf144a
Sgms1	1.70995e-09	0.65277	0.104	0.067	2.61777e-05	CD4 Trm	Sgms1
Mydgf	1.74709e-09	0.462395	0.156	0.112	2.67462e-05	CD4 Trm	Mydgf
Zswim4	1.77514e-09	0.545353	0.129	0.089	2.71756e-05	CD4 Trm	Zswim4
Grpel1	1.81745e-09	0.468366	0.167	0.122	2.78233e-05	CD4 Trm	Grpel1
Acd	1.8974e-09	0.475415	0.167	0.122	2.90473e-05	CD4 Trm	Acd
Tbc1d15	2.0163e-09	0.292605	0.294	0.238	3.08676e-05	CD4 Trm	Tbc1d15
Sys1	2.08789e-09	0.282259	0.357	0.301	3.19635e-05	CD4 Trm	Sys1
Tcf20	2.1386e-09	0.474449	0.144	0.102	3.27399e-05	CD4 Trm	Tcf20
Cacng8	2.22666e-09	5.25594	0.012	0	3.40879e-05	CD4 Trm	Cacng8
Eif2b1	2.2466e-09	0.715478	0.088	0.054	3.43932e-05	CD4 Trm	Eif2b1
Esm1	2.26523e-09	3.6498	0.014	0.001	3.46784e-05	CD4 Trm	Esm1
Abcf1	2.26617e-09	0.296519	0.305	0.248	3.46929e-05	CD4 Trm	Abcf1
Irf7	2.27616e-09	0.514067	0.136	0.095	3.48457e-05	CD4 Trm	Irf7
Dera	2.36709e-09	0.486021	0.146	0.104	3.62377e-05	CD4 Trm	Dera
Mknk1	2.40656e-09	0.772422	0.074	0.043	3.6842e-05	CD4 Trm	Mknk1
Glipr2	2.41509e-09	0.637096	0.096	0.061	3.69726e-05	CD4 Trm	Glipr2
Churc1	2.46168e-09	0.379229	0.235	0.185	3.76859e-05	CD4 Trm	Churc1
Itm2a	2.47649e-09	0.795457	0.089	0.056	3.79126e-05	CD4 Trm	Itm2a
Esrra	2.51627e-09	1.01564	0.058	0.031	3.85216e-05	CD4 Trm	Esrra
Pxmp4	2.58296e-09	0.923603	0.066	0.037	3.95425e-05	CD4 Trm	Pxmp4
Gm10076	2.58956e-09	0.191239	0.48	0.415	3.96436e-05	CD4 Trm	Gm10076
Trim5	2.65856e-09	0.780035	0.077	0.046	4.07e-05	CD4 Trm	Trim5
Apobec2	2.67729e-09	1.96324	0.023	0.006	4.09867e-05	CD4 Trm	Apobec2
Acpp	2.6999e-09	0.872145	0.068	0.038	4.13328e-05	CD4 Trm	Acpp
1110059G10Rik	2.73134e-09	0.497715	0.141	0.1	4.18141e-05	CD4 Trm	1110059G10Rik
Zfp706	2.74306e-09	0.232941	0.357	0.295	4.19935e-05	CD4 Trm	Zfp706
Ech1	2.78789e-09	0.329451	0.243	0.191	4.26799e-05	CD4 Trm	Ech1
Atp5j	2.85949e-09	0.213285	0.529	0.47	4.37759e-05	CD4 Trm	Atp5j
Fam32a	2.86769e-09	0.323088	0.258	0.205	4.39015e-05	CD4 Trm	Fam32a
Nmi	2.90256e-09	0.298569	0.287	0.233	4.44352e-05	CD4 Trm	Nmi
Dnah7a	2.93787e-09	0.470361	0.159	0.116	4.49759e-05	CD4 Trm	Dnah7a
Agap2	2.95318e-09	0.61942	0.105	0.069	4.52103e-05	CD4 Trm	Agap2
Paxx	2.96546e-09	0.588577	0.105	0.068	4.53983e-05	CD4 Trm	Paxx
5830432E09Rik	2.99598e-09	2.40985	0.018	0.003	4.58654e-05	CD4 Trm	5830432E09Rik
Mrps26	3.04051e-09	0.493605	0.137	0.096	4.65472e-05	CD4 Trm	Mrps26
Tmem256	3.04669e-09	0.38786	0.168	0.123	4.66418e-05	CD4 Trm	Tmem256
1110008P14Rik	3.1193e-09	0.336024	0.226	0.174	4.77533e-05	CD4 Trm	1110008P14Rik
Atp6v0b	3.11977e-09	0.325874	0.223	0.172	4.77605e-05	CD4 Trm	Atp6v0b
Terf1	3.19188e-09	0.614039	0.108	0.071	4.88644e-05	CD4 Trm	Terf1
Pdcd5	3.20032e-09	0.345149	0.241	0.189	4.89937e-05	CD4 Trm	Pdcd5
Bud31	3.23292e-09	0.277165	0.302	0.246	4.94928e-05	CD4 Trm	Bud31
Irf2	3.23974e-09	0.311176	0.326	0.271	4.95972e-05	CD4 Trm	Irf2
Crebrf	3.24502e-09	0.364587	0.246	0.195	4.9678e-05	CD4 Trm	Crebrf
Dmac2	3.27151e-09	0.566389	0.104	0.068	5.00835e-05	CD4 Trm	Dmac2
1600014C10Rik	3.27551e-09	0.567289	0.136	0.096	5.01448e-05	CD4 Trm	1600014C10Rik
F8a	3.32786e-09	0.939646	0.052	0.026	5.09462e-05	CD4 Trm	F8a
Hnrnpm	3.33329e-09	0.233296	0.476	0.414	5.10293e-05	CD4 Trm	Hnrnpm
Cmc1	3.34404e-09	0.391275	0.216	0.167	5.11939e-05	CD4 Trm	Cmc1
Nap1l4	3.35092e-09	0.285998	0.326	0.27	5.12992e-05	CD4 Trm	Nap1l4
Htatip2	3.36004e-09	0.634863	0.09	0.056	5.14388e-05	CD4 Trm	Htatip2
Erp29	3.42975e-09	0.363605	0.227	0.177	5.2506e-05	CD4 Trm	Erp29
Acaa2	3.5049e-09	0.572361	0.113	0.076	5.36565e-05	CD4 Trm	Acaa2
Psmd3	3.52584e-09	0.473302	0.173	0.129	5.39771e-05	CD4 Trm	Psmd3
Akt2	3.64214e-09	0.452217	0.182	0.136	5.57575e-05	CD4 Trm	Akt2
Snrpa	3.79386e-09	0.471935	0.18	0.135	5.80802e-05	CD4 Trm	Snrpa
Fbxw2	3.91728e-09	0.412256	0.195	0.148	5.99696e-05	CD4 Trm	Fbxw2
Trip12	3.94623e-09	0.253423	0.362	0.302	6.04128e-05	CD4 Trm	Trip12
Ptcd2	4.06611e-09	0.813604	0.06	0.032	6.2248e-05	CD4 Trm	Ptcd2
Snx17	4.19696e-09	0.503614	0.164	0.121	6.42513e-05	CD4 Trm	Snx17
Ddx39	4.31132e-09	0.432154	0.164	0.12	6.6002e-05	CD4 Trm	Ddx39
Tex10	4.50477e-09	0.506672	0.128	0.089	6.89636e-05	CD4 Trm	Tex10
Ldlr	4.59281e-09	0.753212	0.079	0.048	7.03113e-05	CD4 Trm	Ldlr
Eif3m	4.61178e-09	0.18995	0.557	0.492	7.06017e-05	CD4 Trm	Eif3m
Lsm12	4.65365e-09	0.339846	0.255	0.204	7.12428e-05	CD4 Trm	Lsm12
Slc37a1	4.78376e-09	0.961115	0.053	0.028	7.32346e-05	CD4 Trm	Slc37a1
Polb	4.81103e-09	0.538674	0.12	0.082	7.36521e-05	CD4 Trm	Polb
Zswim1	4.89062e-09	1.82918	0.025	0.007	7.48706e-05	CD4 Trm	Zswim1
Gabpb2	5.1011e-09	0.501214	0.119	0.081	7.80927e-05	CD4 Trm	Gabpb2
Slc25a45	5.11335e-09	0.632104	0.097	0.062	7.82803e-05	CD4 Trm	Slc25a45
Ints14	5.25391e-09	0.656191	0.091	0.058	8.04322e-05	CD4 Trm	Ints14
Maco1	5.27448e-09	0.76984	0.073	0.043	8.0747e-05	CD4 Trm	Maco1
Mknk2	5.29398e-09	0.260933	0.378	0.321	8.10456e-05	CD4 Trm	Mknk2
Cntrl	5.46038e-09	0.303506	0.354	0.3	8.35929e-05	CD4 Trm	Cntrl
Syap1	5.50072e-09	0.422543	0.163	0.119	8.42105e-05	CD4 Trm	Syap1
Igtp	5.54912e-09	0.228463	0.349	0.29	8.49515e-05	CD4 Trm	Igtp
Arfgap2	5.66994e-09	0.509839	0.121	0.083	8.68011e-05	CD4 Trm	Arfgap2
Pdap1	5.70171e-09	0.339463	0.221	0.172	8.72875e-05	CD4 Trm	Pdap1
Ddi2	5.7414e-09	0.677785	0.104	0.069	8.78951e-05	CD4 Trm	Ddi2
Adcy7	5.82776e-09	0.471737	0.16	0.118	8.92172e-05	CD4 Trm	Adcy7
Mrps34	5.8775e-09	0.490498	0.134	0.094	8.99787e-05	CD4 Trm	Mrps34
Ppp1r12c	5.98342e-09	0.442187	0.177	0.133	9.16002e-05	CD4 Trm	Ppp1r12c
Asrgl1	5.99432e-09	0.641143	0.092	0.059	9.1767e-05	CD4 Trm	Asrgl1
Isg20l2	6.07413e-09	0.397918	0.179	0.134	9.29888e-05	CD4 Trm	Isg20l2
Sec24c	6.42131e-09	0.454598	0.156	0.114	9.83039e-05	CD4 Trm	Sec24c
Tes	6.53214e-09	0.221001	0.335	0.275	0.000100001	CD4 Trm	Tes
Katnb1	6.71258e-09	1.08166	0.043	0.02	0.000102763	CD4 Trm	Katnb1
Kdm4a	6.82251e-09	0.662252	0.097	0.063	0.000104446	CD4 Trm	Kdm4a
Plaa	6.83252e-09	0.37954	0.211	0.163	0.000104599	CD4 Trm	Plaa
Pdcd6	6.99055e-09	0.241026	0.322	0.265	0.000107018	CD4 Trm	Pdcd6
Il18rap	7.08047e-09	0.750101	0.147	0.108	0.000108395	CD4 Trm	Il18rap
Klre1	7.1706e-09	3.8961	0.014	0.001	0.000109775	CD4 Trm	Klre1
Asap2	7.19322e-09	1.40175	0.027	0.009	0.000110121	CD4 Trm	Asap2
Mlec	7.19546e-09	0.404449	0.211	0.164	0.000110155	CD4 Trm	Mlec
Ube2c	7.32122e-09	1.13727	0.047	0.023	0.00011208	CD4 Trm	Ube2c
Avl9	7.5928e-09	0.494094	0.148	0.107	0.000116238	CD4 Trm	Avl9
Rab9	7.71986e-09	0.566543	0.103	0.068	0.000118183	CD4 Trm	Rab9
Fam53c	7.7942e-09	0.572124	0.123	0.086	0.000119321	CD4 Trm	Fam53c
Asap1	7.81143e-09	0.476685	0.169	0.126	0.000119585	CD4 Trm	Asap1
Gm28053	8.22044e-09	0.519151	0.119	0.082	0.000125847	CD4 Trm	Gm28053
Tmem222	8.27722e-09	0.521109	0.105	0.069	0.000126716	CD4 Trm	Tmem222
Rab1b	8.51734e-09	0.396046	0.2	0.154	0.000130392	CD4 Trm	Rab1b
Atp8a2	8.67026e-09	0.920986	0.059	0.032	0.000132733	CD4 Trm	Atp8a2
Actn4	8.68313e-09	0.294798	0.284	0.23	0.00013293	CD4 Trm	Actn4
Rpf1	8.8661e-09	0.407888	0.159	0.117	0.000135731	CD4 Trm	Rpf1
Desi2	8.88367e-09	0.500014	0.14	0.1	0.000136	CD4 Trm	Desi2
Entr1	8.91972e-09	0.484661	0.137	0.097	0.000136552	CD4 Trm	Entr1
Git2	8.92383e-09	0.359014	0.212	0.164	0.000136615	CD4 Trm	Git2
Ptpa	8.92642e-09	0.418022	0.17	0.127	0.000136655	CD4 Trm	Ptpa
Tomm70a	9.12001e-09	0.34504	0.198	0.15	0.000139618	CD4 Trm	Tomm70a
Fdft1	9.13582e-09	0.571759	0.108	0.072	0.00013986	CD4 Trm	Fdft1
Snhg8	9.16832e-09	0.254791	0.34	0.282	0.000140358	CD4 Trm	Snhg8
Atox1	1.02498e-08	0.267983	0.349	0.294	0.000156915	CD4 Trm	Atox1
Parp8	1.03169e-08	0.829047	0.051	0.027	0.000157942	CD4 Trm	Parp8
Pglyrp2	1.05963e-08	0.408397	0.165	0.122	0.000162219	CD4 Trm	Pglyrp2
Gm11808	1.08184e-08	0.691155	0.073	0.044	0.000165618	CD4 Trm	Gm11808
Scd2	1.08473e-08	1.3201	0.035	0.014	0.000166061	CD4 Trm	Scd2
Ppp1r35	1.08494e-08	0.698609	0.074	0.045	0.000166093	CD4 Trm	Ppp1r35
Zcchc8	1.09745e-08	0.512089	0.136	0.097	0.000168008	CD4 Trm	Zcchc8
Bbip1	1.10278e-08	0.38153	0.189	0.144	0.000168825	CD4 Trm	Bbip1
Qars	1.10395e-08	0.448795	0.162	0.12	0.000169003	CD4 Trm	Qars
Slc46a3	1.12742e-08	1.06267	0.039	0.018	0.000172596	CD4 Trm	Slc46a3
Fkbp1a	1.14403e-08	0.266675	0.369	0.313	0.00017514	CD4 Trm	Fkbp1a
Ankrd54	1.21144e-08	0.901155	0.057	0.031	0.000185459	CD4 Trm	Ankrd54
Tmem126b	1.2244e-08	0.950218	0.05	0.026	0.000187443	CD4 Trm	Tmem126b
Srpk1	1.24713e-08	0.352707	0.258	0.208	0.000190923	CD4 Trm	Srpk1
Snrpd3	1.25307e-08	0.245981	0.333	0.274	0.000191832	CD4 Trm	Snrpd3
Bach2	1.26776e-08	0.797582	0.076	0.046	0.000194081	CD4 Trm	Bach2
Dvl2	1.27998e-08	1.05253	0.037	0.016	0.000195952	CD4 Trm	Dvl2
Thap11	1.28585e-08	0.686011	0.08	0.05	0.00019685	CD4 Trm	Thap11
Copa	1.29729e-08	0.282829	0.237	0.187	0.000198603	CD4 Trm	Copa
Rabif	1.33657e-08	0.612036	0.092	0.06	0.000204616	CD4 Trm	Rabif
Lnpep	1.37494e-08	0.274942	0.304	0.252	0.00021049	CD4 Trm	Lnpep
Vps36	1.41206e-08	0.327132	0.235	0.186	0.000216172	CD4 Trm	Vps36
AI847159	1.4206e-08	1.94564	0.021	0.005	0.000217479	CD4 Trm	AI847159
Ak3	1.45499e-08	0.567599	0.114	0.079	0.000222745	CD4 Trm	Ak3
Fbxl6	1.47619e-08	0.501079	0.147	0.107	0.00022599	CD4 Trm	Fbxl6
Nelfb	1.52126e-08	0.539135	0.111	0.076	0.000232889	CD4 Trm	Nelfb
Ormdl1	1.52335e-08	0.544977	0.101	0.067	0.00023321	CD4 Trm	Ormdl1
Stx5a	1.58608e-08	0.331158	0.231	0.183	0.000242813	CD4 Trm	Stx5a
Apobr	1.63277e-08	0.940545	0.05	0.026	0.000249961	CD4 Trm	Apobr
AI854703	1.64684e-08	1.6805	0.025	0.008	0.000252115	CD4 Trm	AI854703
Trim12c	1.65988e-08	0.543637	0.122	0.085	0.000254111	CD4 Trm	Trim12c
Taf9b	1.7215e-08	0.708697	0.062	0.035	0.000263545	CD4 Trm	Taf9b
Atpif1	1.74896e-08	0.317603	0.215	0.166	0.000267749	CD4 Trm	Atpif1
Gm15232	1.76225e-08	1.63107	0.023	0.007	0.000269783	CD4 Trm	Gm15232
Ndc80	1.79057e-08	1.00734	0.041	0.019	0.000274118	CD4 Trm	Ndc80
Scamp3	1.79227e-08	0.334125	0.241	0.193	0.000274378	CD4 Trm	Scamp3
Eif3e	1.8631e-08	0.177809	0.57	0.51	0.000285222	CD4 Trm	Eif3e
Ndufa13	1.88238e-08	0.24286	0.457	0.404	0.000288174	CD4 Trm	Ndufa13
Stag2	1.88848e-08	0.227927	0.329	0.272	0.000289107	CD4 Trm	Stag2
Jmjd6	1.91373e-08	0.556302	0.103	0.069	0.000292972	CD4 Trm	Jmjd6
Exoc6	1.9388e-08	0.555904	0.101	0.067	0.000296811	CD4 Trm	Exoc6
Lsm5	1.94389e-08	0.352678	0.218	0.17	0.00029759	CD4 Trm	Lsm5
Tle3	2.02566e-08	0.48708	0.137	0.098	0.000310108	CD4 Trm	Tle3
Acap1	2.0902e-08	0.223305	0.325	0.268	0.000319989	CD4 Trm	Acap1
Tufm	2.09429e-08	0.642855	0.089	0.058	0.000320614	CD4 Trm	Tufm
Incenp	2.09857e-08	0.701439	0.076	0.047	0.00032127	CD4 Trm	Incenp
C1galt1	2.10574e-08	0.494997	0.106	0.071	0.000322368	CD4 Trm	C1galt1
Atxn7l3b	2.16168e-08	0.354954	0.236	0.188	0.000330931	CD4 Trm	Atxn7l3b
H2-DMa	2.19768e-08	0.708292	0.087	0.056	0.000336442	CD4 Trm	H2-DMa
Sulf2	2.21814e-08	2.57491	0.017	0.003	0.000339574	CD4 Trm	Sulf2
Pitpna	2.23147e-08	0.236184	0.358	0.301	0.000341615	CD4 Trm	Pitpna
Nsdhl	2.49584e-08	0.636254	0.08	0.05	0.000382088	CD4 Trm	Nsdhl
Ywhab	2.49786e-08	0.235379	0.426	0.369	0.000382397	CD4 Trm	Ywhab
Chmp4b	2.50314e-08	0.198955	0.522	0.463	0.000383206	CD4 Trm	Chmp4b
Mad2l1bp	2.53008e-08	0.609802	0.088	0.057	0.00038733	CD4 Trm	Mad2l1bp
Akt1	2.53328e-08	0.398457	0.179	0.136	0.000387819	CD4 Trm	Akt1
Rexo4	2.63819e-08	0.527396	0.106	0.072	0.000403881	CD4 Trm	Rexo4
Cox10	2.65085e-08	0.691174	0.077	0.047	0.000405819	CD4 Trm	Cox10
Alkbh4	2.68019e-08	1.03546	0.038	0.017	0.00041031	CD4 Trm	Alkbh4
Csnk1a1	2.68806e-08	0.158708	0.596	0.538	0.000411515	CD4 Trm	Csnk1a1
Rrm2b	2.71373e-08	0.381697	0.182	0.139	0.000415445	CD4 Trm	Rrm2b
Zc3h13	2.74453e-08	0.320671	0.217	0.169	0.000420161	CD4 Trm	Zc3h13
Fkbp8	2.82918e-08	0.279393	0.335	0.282	0.00043312	CD4 Trm	Fkbp8
Sin3b	2.84653e-08	0.216664	0.422	0.366	0.000435775	CD4 Trm	Sin3b
Nudt3	2.87032e-08	0.55337	0.102	0.068	0.000439418	CD4 Trm	Nudt3
Krtcap2	2.93095e-08	0.201352	0.489	0.429	0.000448698	CD4 Trm	Krtcap2
Bnip3l	3.10156e-08	0.186265	0.496	0.434	0.000474819	CD4 Trm	Bnip3l
Sh3glb1	3.14362e-08	0.180624	0.45	0.393	0.000481257	CD4 Trm	Sh3glb1
Sp2	3.18027e-08	0.498795	0.133	0.096	0.000486867	CD4 Trm	Sp2
Recql	3.21072e-08	0.780035	0.058	0.033	0.000491529	CD4 Trm	Recql
Kcnab2	3.21317e-08	0.441272	0.148	0.108	0.000491905	CD4 Trm	Kcnab2
Sptssa	3.22808e-08	0.331742	0.232	0.186	0.000494187	CD4 Trm	Sptssa
Casp2	3.25164e-08	0.91125	0.051	0.028	0.000497794	CD4 Trm	Casp2
Cd9	3.30723e-08	0.833823	0.06	0.034	0.000506304	CD4 Trm	Cd9
Dguok	3.32761e-08	0.423404	0.164	0.122	0.000509425	CD4 Trm	Dguok
Ap1m1	3.34787e-08	0.471491	0.136	0.098	0.000512526	CD4 Trm	Ap1m1
Naa16	3.4411e-08	0.660993	0.069	0.041	0.000526798	CD4 Trm	Naa16
Ogfr	3.45824e-08	0.317369	0.228	0.181	0.000529421	CD4 Trm	Ogfr
Ino80b	3.53707e-08	0.665507	0.081	0.051	0.000541489	CD4 Trm	Ino80b
Pecam1	3.68916e-08	0.562639	0.109	0.075	0.000564774	CD4 Trm	Pecam1
Ifitm3	3.70451e-08	1.52188	0.03	0.012	0.000567123	CD4 Trm	Ifitm3
Puf60	3.7306e-08	0.254653	0.337	0.284	0.000571117	CD4 Trm	Puf60
Trav14d-3-dv8	3.85947e-08	1.95798	0.017	0.003	0.000590846	CD4 Trm	Trav14d-3-dv8
Spout1	3.90197e-08	1.02316	0.04	0.019	0.000597352	CD4 Trm	Spout1
Ssr1	3.90417e-08	0.450494	0.164	0.123	0.000597689	CD4 Trm	Ssr1
Chmp6	3.97115e-08	0.762864	0.068	0.041	0.000607944	CD4 Trm	Chmp6
Themis2	4.24089e-08	2.28602	0.016	0.003	0.000649237	CD4 Trm	Themis2
Pnisr	4.27592e-08	0.290911	0.267	0.217	0.000654601	CD4 Trm	Pnisr
Taf8	4.33293e-08	0.74525	0.069	0.041	0.000663329	CD4 Trm	Taf8
Leprotl1	4.36346e-08	0.156926	0.598	0.542	0.000668002	CD4 Trm	Leprotl1
Eif4a2	4.3822e-08	0.226886	0.531	0.483	0.000670871	CD4 Trm	Eif4a2
Tbrg1	4.43376e-08	0.249214	0.367	0.314	0.000678764	CD4 Trm	Tbrg1
Tatdn2	4.4624e-08	0.448543	0.177	0.136	0.000683149	CD4 Trm	Tatdn2
Edem1	4.48964e-08	0.239317	0.309	0.255	0.000687319	CD4 Trm	Edem1
Slc12a7	4.49306e-08	0.923293	0.05	0.027	0.000687843	CD4 Trm	Slc12a7
Rtcb	4.72699e-08	0.397937	0.168	0.127	0.000723655	CD4 Trm	Rtcb
Ndufb2	4.80572e-08	0.318992	0.2	0.156	0.000735707	CD4 Trm	Ndufb2
Nras	4.83064e-08	0.517461	0.125	0.089	0.000739523	CD4 Trm	Nras
Prpf38b	4.84607e-08	0.287517	0.304	0.253	0.000741885	CD4 Trm	Prpf38b
Nmt1	4.88258e-08	0.37739	0.172	0.13	0.000747475	CD4 Trm	Nmt1
Cnbd2	4.91048e-08	0.746793	0.061	0.035	0.000751745	CD4 Trm	Cnbd2
Zscan2	4.95694e-08	1.14223	0.036	0.016	0.000758859	CD4 Trm	Zscan2
Anapc5	5.10729e-08	0.390696	0.16	0.119	0.000781876	CD4 Trm	Anapc5
Ino80e	5.12754e-08	0.552995	0.11	0.076	0.000784974	CD4 Trm	Ino80e
Gm36738	5.12979e-08	0.691548	0.083	0.053	0.00078532	CD4 Trm	Gm36738
Dcp2	5.19896e-08	0.418909	0.16	0.12	0.000795909	CD4 Trm	Dcp2
Nxf1	5.20856e-08	0.3059	0.226	0.179	0.000797379	CD4 Trm	Nxf1
Mrps15	5.47354e-08	0.404558	0.161	0.12	0.000837944	CD4 Trm	Mrps15
Lypla1	5.51549e-08	0.345379	0.213	0.168	0.000844367	CD4 Trm	Lypla1
Eloa	5.55969e-08	0.378333	0.182	0.14	0.000851132	CD4 Trm	Eloa
Rnpc3	5.57808e-08	0.520314	0.123	0.088	0.000853948	CD4 Trm	Rnpc3
Mkrn2	5.95019e-08	0.540887	0.124	0.089	0.000910915	CD4 Trm	Mkrn2
Dhrs1	6.00641e-08	0.622995	0.091	0.06	0.000919521	CD4 Trm	Dhrs1
Cdc5l	6.0167e-08	0.26902	0.253	0.204	0.000921097	CD4 Trm	Cdc5l
Ppp1r8	6.03064e-08	0.538932	0.101	0.068	0.000923231	CD4 Trm	Ppp1r8
Ric1	6.05942e-08	0.342018	0.227	0.181	0.000927636	CD4 Trm	Ric1
Akr1a1	6.06734e-08	0.19005	0.385	0.327	0.000928849	CD4 Trm	Akr1a1
Actr10	6.22373e-08	0.302634	0.213	0.167	0.00095279	CD4 Trm	Actr10
Rsl1d1	6.25032e-08	0.244503	0.354	0.3	0.000956862	CD4 Trm	Rsl1d1
Atp5o.1	6.43694e-08	0.238458	0.363	0.309	0.000985431	CD4 Trm	Atp5o.1
Ndufs2	6.54428e-08	0.352869	0.204	0.16	0.00100186	CD4 Trm	Ndufs2
Ppif	6.61105e-08	0.634737	0.081	0.052	0.00101209	CD4 Trm	Ppif
LTO1	6.65346e-08	0.934011	0.048	0.025	0.00101858	CD4 Trm	LTO1
Slc44a2	6.80855e-08	0.415796	0.139	0.101	0.00104232	CD4 Trm	Slc44a2
Fkbp15	6.84511e-08	0.51806	0.109	0.076	0.00104792	CD4 Trm	Fkbp15
Alg10b	6.87423e-08	0.688191	0.063	0.037	0.00105238	CD4 Trm	Alg10b
Rp9	6.89774e-08	0.286423	0.295	0.246	0.00105598	CD4 Trm	Rp9
Gbp6	6.98717e-08	0.440549	0.135	0.098	0.00106967	CD4 Trm	Gbp6
Ifi35	7.06047e-08	0.435847	0.166	0.126	0.00108089	CD4 Trm	Ifi35
Mrpl36	7.33323e-08	0.352352	0.16	0.119	0.00112264	CD4 Trm	Mrpl36
Psmb5	7.45518e-08	0.293845	0.3	0.251	0.00114131	CD4 Trm	Psmb5
Vta1	7.68284e-08	0.402124	0.159	0.119	0.00117617	CD4 Trm	Vta1
Eif3i	7.79222e-08	0.20319	0.406	0.35	0.00119291	CD4 Trm	Eif3i
Tbc1d17	7.79845e-08	0.639277	0.069	0.042	0.00119386	CD4 Trm	Tbc1d17
Vapb	7.90292e-08	0.369158	0.172	0.131	0.00120986	CD4 Trm	Vapb
Tra2b	7.91241e-08	0.231635	0.483	0.43	0.00121131	CD4 Trm	Tra2b
Casp8	7.96082e-08	0.305382	0.253	0.206	0.00121872	CD4 Trm	Casp8
Pkn1	8.06195e-08	0.261678	0.285	0.235	0.0012342	CD4 Trm	Pkn1
St6galnac4	8.06221e-08	0.851176	0.054	0.03	0.00123424	CD4 Trm	St6galnac4
Slamf1	8.06238e-08	0.246808	0.289	0.238	0.00123427	CD4 Trm	Slamf1
Zfp120	8.15747e-08	0.637473	0.074	0.046	0.00124883	CD4 Trm	Zfp120
Mthfd2	8.21525e-08	0.284266	0.222	0.176	0.00125767	CD4 Trm	Mthfd2
Purb	8.42378e-08	0.222718	0.344	0.29	0.0012896	CD4 Trm	Purb
Tspyl4	8.44359e-08	1.36725	0.028	0.011	0.00129263	CD4 Trm	Tspyl4
Fbxo21	8.6539e-08	0.793217	0.063	0.037	0.00132483	CD4 Trm	Fbxo21
Tnrc6b	8.66817e-08	0.273702	0.331	0.28	0.00132701	CD4 Trm	Tnrc6b
Pmm2	8.73733e-08	0.362575	0.124	0.088	0.0013376	CD4 Trm	Pmm2
Ltn1	8.82228e-08	0.614023	0.084	0.055	0.0013506	CD4 Trm	Ltn1
Polr2i	8.83885e-08	0.5696	0.09	0.059	0.00135314	CD4 Trm	Polr2i
Ythdc2	8.85626e-08	0.67536	0.069	0.042	0.00135581	CD4 Trm	Ythdc2
Elof1	8.93402e-08	0.55215	0.116	0.082	0.00136771	CD4 Trm	Elof1
Zdhhc7	9.01031e-08	0.665385	0.095	0.064	0.00137939	CD4 Trm	Zdhhc7
Uba1	9.12677e-08	0.229359	0.384	0.333	0.00139722	CD4 Trm	Uba1
Lrch1	9.14874e-08	0.489631	0.121	0.086	0.00140058	CD4 Trm	Lrch1
Dse	9.22957e-08	2.28057	0.015	0.003	0.00141295	CD4 Trm	Dse
Ncoa1	9.26806e-08	0.412981	0.125	0.089	0.00141885	CD4 Trm	Ncoa1
Sem1	9.43524e-08	0.153943	0.646	0.592	0.00144444	CD4 Trm	Sem1
Tbl1xr1	9.5693e-08	0.457519	0.153	0.115	0.00146496	CD4 Trm	Tbl1xr1
Mrpl19	9.66253e-08	0.569929	0.099	0.067	0.00147924	CD4 Trm	Mrpl19
Use1	9.84373e-08	0.186533	0.441	0.382	0.00150698	CD4 Trm	Use1
Capns1	9.8553e-08	0.248458	0.335	0.286	0.00150875	CD4 Trm	Capns1
Rnf4	1.04255e-07	0.333167	0.241	0.196	0.00159604	CD4 Trm	Rnf4
Aspscr1	1.05916e-07	0.426032	0.122	0.087	0.00162147	CD4 Trm	Aspscr1
Sdhb	1.05954e-07	0.251648	0.329	0.278	0.00162205	CD4 Trm	Sdhb
Cramp1l	1.07394e-07	0.861884	0.054	0.031	0.0016441	CD4 Trm	Cramp1l
Uvrag	1.07432e-07	0.379412	0.168	0.128	0.00164467	CD4 Trm	Uvrag
Rps6kb1	1.07735e-07	0.354482	0.184	0.142	0.00164932	CD4 Trm	Rps6kb1
Hscb	1.07828e-07	0.442615	0.129	0.093	0.00165074	CD4 Trm	Hscb
Gabarapl1	1.07959e-07	0.45554	0.143	0.106	0.00165274	CD4 Trm	Gabarapl1
Haus4	1.08239e-07	0.553841	0.085	0.055	0.00165703	CD4 Trm	Haus4
Mrps33	1.10295e-07	0.353818	0.207	0.164	0.00168851	CD4 Trm	Mrps33
Uimc1	1.12645e-07	0.396432	0.161	0.122	0.00172448	CD4 Trm	Uimc1
Dram2	1.13388e-07	0.583881	0.092	0.061	0.00173585	CD4 Trm	Dram2
Dedd2	1.1826e-07	0.444618	0.131	0.095	0.00181044	CD4 Trm	Dedd2
Ykt6	1.18638e-07	0.441727	0.132	0.096	0.00181622	CD4 Trm	Ykt6
Chchd10	1.21822e-07	0.562196	0.094	0.063	0.00186498	CD4 Trm	Chchd10
Cyp51	1.22485e-07	0.265279	0.327	0.276	0.00187512	CD4 Trm	Cyp51
Supt5	1.22663e-07	0.24137	0.291	0.24	0.00187786	CD4 Trm	Supt5
Sft2d2	1.25068e-07	0.650614	0.08	0.052	0.00191466	CD4 Trm	Sft2d2
Trnt1	1.27594e-07	0.281723	0.221	0.175	0.00195333	CD4 Trm	Trnt1
Uqcrc2	1.2834e-07	0.221117	0.347	0.294	0.00196476	CD4 Trm	Uqcrc2
Srsf2	1.33076e-07	0.184913	0.537	0.481	0.00203726	CD4 Trm	Srsf2
Casp8ap2	1.34293e-07	0.479239	0.132	0.096	0.00205589	CD4 Trm	Casp8ap2
Cct2	1.34639e-07	0.185208	0.445	0.389	0.00206118	CD4 Trm	Cct2
Xpo1	1.37783e-07	0.481073	0.116	0.082	0.00210932	CD4 Trm	Xpo1
Uqcrc1	1.37812e-07	0.195043	0.311	0.257	0.00210977	CD4 Trm	Uqcrc1
Ccdc124	1.41346e-07	0.440522	0.133	0.097	0.00216386	CD4 Trm	Ccdc124
Lamtor5	1.44805e-07	0.279929	0.273	0.225	0.00221681	CD4 Trm	Lamtor5
Knstrn	1.46709e-07	1.39605	0.027	0.011	0.00224597	CD4 Trm	Knstrn
Wbp1	1.48313e-07	0.572124	0.093	0.063	0.00227053	CD4 Trm	Wbp1
Higd1a	1.50603e-07	0.36238	0.221	0.178	0.00230558	CD4 Trm	Higd1a
Usp45	1.51676e-07	0.531006	0.108	0.076	0.00232201	CD4 Trm	Usp45
Gm49602	1.51747e-07	1.18103	0.034	0.015	0.00232309	CD4 Trm	Gm49602
Ncbp3	1.51854e-07	0.461924	0.118	0.085	0.00232473	CD4 Trm	Ncbp3
Lcn4	1.52207e-07	3.63224	0.011	0.001	0.00233014	CD4 Trm	Lcn4
Dpm1	1.56517e-07	0.56916	0.089	0.059	0.00239611	CD4 Trm	Dpm1
Gltp	1.59167e-07	0.319301	0.248	0.202	0.00243668	CD4 Trm	Gltp
Trim8	1.59677e-07	0.638793	0.075	0.047	0.0024445	CD4 Trm	Trim8
Zfp87	1.6012e-07	0.679803	0.053	0.03	0.00245127	CD4 Trm	Zfp87
Rraga	1.61496e-07	0.361576	0.184	0.143	0.00247234	CD4 Trm	Rraga
Tapbp	1.67505e-07	0.250679	0.328	0.278	0.00256434	CD4 Trm	Tapbp
Vav3	1.70812e-07	0.461876	0.126	0.092	0.00261495	CD4 Trm	Vav3
Abcb4	1.70861e-07	2.51295	0.014	0.003	0.0026157	CD4 Trm	Abcb4
Rab10os	1.72096e-07	0.292034	0.228	0.183	0.00263462	CD4 Trm	Rab10os
Eid1	1.73148e-07	0.432338	0.145	0.108	0.00265072	CD4 Trm	Eid1
Ube2g2	1.79761e-07	0.694633	0.069	0.043	0.00275196	CD4 Trm	Ube2g2
Dusp11	1.81485e-07	0.219587	0.344	0.291	0.00277835	CD4 Trm	Dusp11
Clip1	1.84e-07	0.302256	0.212	0.168	0.00281686	CD4 Trm	Clip1
Luc7l3	1.86558e-07	0.457994	0.127	0.093	0.00285601	CD4 Trm	Luc7l3
Fermt3	1.88413e-07	0.179398	0.424	0.367	0.00288442	CD4 Trm	Fermt3
Cep57	1.89624e-07	0.286688	0.22	0.175	0.00290296	CD4 Trm	Cep57
Mtpn	1.98231e-07	0.295388	0.233	0.189	0.00303471	CD4 Trm	Mtpn
Ppp3r1	1.98513e-07	0.341169	0.187	0.146	0.00303903	CD4 Trm	Ppp3r1
Haus6	2.03812e-07	0.875516	0.051	0.029	0.00312015	CD4 Trm	Haus6
Med13l	2.10766e-07	0.328062	0.197	0.155	0.00322662	CD4 Trm	Med13l
Fntb	2.12709e-07	1.35336	0.024	0.009	0.00325636	CD4 Trm	Fntb
Usf2	2.16174e-07	0.336003	0.235	0.191	0.0033094	CD4 Trm	Usf2
Rex1bd	2.16225e-07	0.411075	0.145	0.108	0.00331019	CD4 Trm	Rex1bd
Coa6	2.18325e-07	0.568244	0.086	0.057	0.00334234	CD4 Trm	Coa6
Cln3	2.20545e-07	0.58244	0.074	0.047	0.00337632	CD4 Trm	Cln3
Arid1a	2.23173e-07	0.225837	0.347	0.295	0.00341655	CD4 Trm	Arid1a
Acadm	2.25411e-07	0.522064	0.086	0.057	0.00345082	CD4 Trm	Acadm
Ttc17	2.30129e-07	0.588531	0.078	0.051	0.00352304	CD4 Trm	Ttc17
Pdcl3	2.31273e-07	0.454505	0.125	0.091	0.00354056	CD4 Trm	Pdcl3
Mpzl3	2.39099e-07	0.750141	0.058	0.034	0.00366036	CD4 Trm	Mpzl3
Pcgf1	2.39227e-07	0.914775	0.046	0.024	0.00366232	CD4 Trm	Pcgf1
Ndufb6	2.397e-07	0.318893	0.224	0.181	0.00366957	CD4 Trm	Ndufb6
Polr2c	2.40292e-07	0.318737	0.216	0.172	0.00367863	CD4 Trm	Polr2c
Hmgcl	2.42646e-07	0.518181	0.098	0.067	0.00371467	CD4 Trm	Hmgcl
Cdk17	2.45294e-07	0.263461	0.311	0.264	0.0037552	CD4 Trm	Cdk17
Ska2	2.47946e-07	1.29469	0.027	0.011	0.00379581	CD4 Trm	Ska2
Sec22c	2.49291e-07	1.05706	0.035	0.016	0.00381639	CD4 Trm	Sec22c
Ndufb5	2.51534e-07	0.260431	0.314	0.265	0.00385074	CD4 Trm	Ndufb5
Mterf3	2.53858e-07	0.501405	0.123	0.089	0.00388631	CD4 Trm	Mterf3
Ripk1	2.54102e-07	0.465148	0.123	0.09	0.00389004	CD4 Trm	Ripk1
Gm4070	2.56421e-07	0.470113	0.09	0.06	0.00392554	CD4 Trm	Gm4070
Asxl2	2.57354e-07	0.200868	0.275	0.225	0.00393983	CD4 Trm	Asxl2
Ubl7	2.57621e-07	0.425619	0.144	0.108	0.00394392	CD4 Trm	Ubl7
Imp3	2.57774e-07	0.244325	0.3	0.252	0.00394627	CD4 Trm	Imp3
Ecsit	2.62257e-07	0.707503	0.059	0.035	0.0040149	CD4 Trm	Ecsit
Hikeshi	2.62724e-07	0.488761	0.118	0.085	0.00402204	CD4 Trm	Hikeshi
Hsbp1	2.65747e-07	0.290487	0.249	0.204	0.00406832	CD4 Trm	Hsbp1
Pole4	2.74258e-07	0.274187	0.271	0.224	0.00419861	CD4 Trm	Pole4
Ints13	2.74875e-07	0.516567	0.105	0.074	0.00420807	CD4 Trm	Ints13
Prkx	2.79536e-07	0.361011	0.15	0.112	0.00427942	CD4 Trm	Prkx
Prdx5	2.8485e-07	0.202305	0.322	0.27	0.00436077	CD4 Trm	Prdx5
Nde1	2.8517e-07	0.491845	0.095	0.065	0.00436566	CD4 Trm	Nde1
Tmem251	2.87948e-07	0.449486	0.108	0.076	0.0044082	CD4 Trm	Tmem251
2310061I04Rik	2.93106e-07	0.771003	0.059	0.035	0.00448717	CD4 Trm	2310061I04Rik
Eipr1	2.93809e-07	0.500926	0.096	0.066	0.00449793	CD4 Trm	Eipr1
Ikzf5	2.98404e-07	0.567434	0.103	0.072	0.00456826	CD4 Trm	Ikzf5
Hrh2	3.00935e-07	1.73178	0.016	0.004	0.00460701	CD4 Trm	Hrh2
Rnf126	3.0193e-07	0.4643	0.128	0.094	0.00462224	CD4 Trm	Rnf126
Rprd1b	3.04082e-07	0.545549	0.09	0.061	0.0046552	CD4 Trm	Rprd1b
Fis1	3.04572e-07	0.199235	0.392	0.341	0.00466269	CD4 Trm	Fis1
Vps51	3.10653e-07	0.552545	0.084	0.056	0.00475579	CD4 Trm	Vps51
Rtca	3.13639e-07	0.502401	0.079	0.052	0.00480151	CD4 Trm	Rtca
Bnip2	3.17102e-07	0.367326	0.163	0.125	0.00485451	CD4 Trm	Bnip2
Eif2d	3.1903e-07	0.505493	0.125	0.092	0.00488403	CD4 Trm	Eif2d
Krcc1	3.20877e-07	0.304929	0.215	0.172	0.0049123	CD4 Trm	Krcc1
Commd1	3.24277e-07	0.542237	0.094	0.064	0.00496436	CD4 Trm	Commd1
Gmnn	3.26382e-07	0.742528	0.058	0.034	0.00499658	CD4 Trm	Gmnn
Tmem97	3.28397e-07	0.804541	0.051	0.029	0.00502743	CD4 Trm	Tmem97
Vezf1	3.33302e-07	0.307774	0.213	0.17	0.00510251	CD4 Trm	Vezf1
Tmem242	3.35336e-07	0.520859	0.09	0.061	0.00513366	CD4 Trm	Tmem242
Gcfc2	3.48387e-07	1.037	0.028	0.012	0.00533346	CD4 Trm	Gcfc2
Itpr1	3.50874e-07	0.369702	0.174	0.135	0.00537153	CD4 Trm	Itpr1
Chst11	3.52405e-07	0.675561	0.072	0.046	0.00539496	CD4 Trm	Chst11
Kbtbd2	3.53967e-07	0.458704	0.128	0.095	0.00541887	CD4 Trm	Kbtbd2
Cops8	3.60929e-07	0.39065	0.167	0.129	0.00552546	CD4 Trm	Cops8
Coro1c	3.6261e-07	0.460926	0.119	0.086	0.0055512	CD4 Trm	Coro1c
Gm29719	3.64021e-07	1.567	0.021	0.007	0.0055728	CD4 Trm	Gm29719
Mto1	3.64457e-07	1.40124	0.025	0.01	0.00557947	CD4 Trm	Mto1
Adprm	3.66915e-07	0.560222	0.088	0.059	0.0056171	CD4 Trm	Adprm
Gdap2	3.67112e-07	0.59528	0.077	0.05	0.00562011	CD4 Trm	Gdap2
Mettl23	3.71488e-07	0.285825	0.3	0.254	0.00568712	CD4 Trm	Mettl23
Pam16	3.7948e-07	0.422458	0.127	0.093	0.00580946	CD4 Trm	Pam16
Nup153	3.81438e-07	0.281713	0.227	0.183	0.00583944	CD4 Trm	Nup153
Naa38	3.83451e-07	0.397624	0.166	0.128	0.00587025	CD4 Trm	Naa38
Sos1	3.88888e-07	0.526279	0.092	0.062	0.00595348	CD4 Trm	Sos1
Mtch1	3.91942e-07	0.396629	0.147	0.111	0.00600024	CD4 Trm	Mtch1
Sumo2	3.92374e-07	0.133299	0.7	0.653	0.00600685	CD4 Trm	Sumo2
Phkg2	3.9243e-07	0.459065	0.129	0.095	0.00600771	CD4 Trm	Phkg2
Txnrd1	3.93958e-07	0.300214	0.245	0.201	0.0060311	CD4 Trm	Txnrd1
Sec13	3.94648e-07	0.331439	0.22	0.178	0.00604167	CD4 Trm	Sec13
Tut7	3.97284e-07	0.21835	0.343	0.293	0.00608202	CD4 Trm	Tut7
Mtus1	4.00335e-07	2.27806	0.015	0.003	0.00612873	CD4 Trm	Mtus1
Arhgap18	4.02036e-07	0.362634	0.15	0.113	0.00615477	CD4 Trm	Arhgap18
Crlf3	4.15259e-07	0.192105	0.322	0.272	0.0063572	CD4 Trm	Crlf3
Nxn	4.16083e-07	1.21917	0.031	0.014	0.00636981	CD4 Trm	Nxn
Fopnl	4.18289e-07	0.555229	0.095	0.065	0.00640358	CD4 Trm	Fopnl
Cenpw	4.22754e-07	0.743797	0.059	0.035	0.00647194	CD4 Trm	Cenpw
Hectd3	4.24399e-07	0.699666	0.062	0.038	0.00649712	CD4 Trm	Hectd3
Mrtfa	4.24997e-07	0.404963	0.141	0.105	0.00650628	CD4 Trm	Mrtfa
Mob3a	4.28225e-07	0.384383	0.164	0.127	0.0065557	CD4 Trm	Mob3a
Spryd7	4.35891e-07	0.609268	0.1	0.07	0.00667306	CD4 Trm	Spryd7
Grcc10	4.36085e-07	0.291847	0.261	0.217	0.00667603	CD4 Trm	Grcc10
Ryr1	4.38771e-07	3.38677	0.01	0.001	0.00671715	CD4 Trm	Ryr1
Rbm10	4.41178e-07	0.472437	0.107	0.076	0.006754	CD4 Trm	Rbm10
Glyr1	4.4152e-07	0.290646	0.185	0.145	0.00675923	CD4 Trm	Glyr1
Cpsf2	4.50045e-07	0.428272	0.124	0.091	0.00688973	CD4 Trm	Cpsf2
Plaat3	4.52324e-07	0.138287	0.515	0.457	0.00692462	CD4 Trm	Plaat3
Cep192	4.54016e-07	0.558214	0.089	0.06	0.00695053	CD4 Trm	Cep192
Pgm2l1	4.66926e-07	0.46207	0.129	0.096	0.00714817	CD4 Trm	Pgm2l1
Jtb	4.83359e-07	0.356878	0.192	0.153	0.00739975	CD4 Trm	Jtb
Chtop	4.89636e-07	0.272545	0.215	0.172	0.00749583	CD4 Trm	Chtop
Aggf1	5.06851e-07	0.330663	0.206	0.165	0.00775938	CD4 Trm	Aggf1
Mrpl10	5.09829e-07	0.481816	0.122	0.089	0.00780498	CD4 Trm	Mrpl10
Spink13	5.11644e-07	2.46757	0.012	0.002	0.00783276	CD4 Trm	Spink13
Rapgef1	5.38666e-07	0.355478	0.159	0.121	0.00824643	CD4 Trm	Rapgef1
Cyren	5.44671e-07	0.943534	0.035	0.017	0.00833837	CD4 Trm	Cyren
Minpp1	5.50385e-07	0.542828	0.081	0.054	0.00842584	CD4 Trm	Minpp1
Golga7	5.52638e-07	0.360368	0.188	0.149	0.00846033	CD4 Trm	Golga7
Zfand2b	5.63752e-07	0.471414	0.117	0.085	0.00863047	CD4 Trm	Zfand2b
Prpf18	5.68091e-07	0.382575	0.148	0.111	0.0086969	CD4 Trm	Prpf18
Il17ra	5.7014e-07	0.421021	0.133	0.099	0.00872827	CD4 Trm	Il17ra
Coa3	5.7927e-07	0.423609	0.129	0.095	0.00886804	CD4 Trm	Coa3
Ndufb9	5.92199e-07	0.313019	0.303	0.26	0.00906598	CD4 Trm	Ndufb9
Ptpn1	6.04519e-07	0.179377	0.409	0.354	0.00925458	CD4 Trm	Ptpn1
Tm6sf1	6.05737e-07	2.44007	0.014	0.003	0.00927323	CD4 Trm	Tm6sf1
Pdpk1	6.05994e-07	0.369821	0.15	0.113	0.00927716	CD4 Trm	Pdpk1
Zfp512	6.06092e-07	0.938463	0.042	0.022	0.00927866	CD4 Trm	Zfp512
Smg7	6.12224e-07	0.36939	0.168	0.13	0.00937254	CD4 Trm	Smg7
Dbnl	6.12606e-07	0.243721	0.27	0.224	0.00937839	CD4 Trm	Dbnl
Ciao2a	6.40644e-07	0.273874	0.226	0.184	0.00980763	CD4 Trm	Ciao2a
Fchsd2	6.44543e-07	0.521879	0.096	0.067	0.00986732	CD4 Trm	Fchsd2
Gtf2h1	6.60952e-07	0.380728	0.143	0.108	0.0101185	CD4 Trm	Gtf2h1
Mrps36	6.6202e-07	0.447018	0.133	0.1	0.0101349	CD4 Trm	Mrps36
Il27ra	6.66783e-07	0.261304	0.263	0.217	0.0102078	CD4 Trm	Il27ra
Hk1	6.74145e-07	0.282548	0.231	0.188	0.0103205	CD4 Trm	Hk1
Zbtb2	6.75761e-07	0.709791	0.066	0.042	0.0103452	CD4 Trm	Zbtb2
Ift52	6.76151e-07	0.448622	0.104	0.074	0.0103512	CD4 Trm	Ift52
Ifitm10	6.79913e-07	2.56773	0.012	0.002	0.0104088	CD4 Trm	Ifitm10
Tab2	6.90156e-07	0.161967	0.412	0.357	0.0105656	CD4 Trm	Tab2
Nbeal2	6.95939e-07	0.711334	0.067	0.042	0.0106541	CD4 Trm	Nbeal2
Pigyl	6.97778e-07	0.564023	0.074	0.048	0.0106823	CD4 Trm	Pigyl
Dync1li2	7.04958e-07	0.63917	0.059	0.036	0.0107922	CD4 Trm	Dync1li2
Pde12	7.09244e-07	0.549509	0.077	0.051	0.0108578	CD4 Trm	Pde12
Rfc1	7.1304e-07	0.516435	0.097	0.067	0.0109159	CD4 Trm	Rfc1
Atp13a1	7.19394e-07	0.57553	0.075	0.049	0.0110132	CD4 Trm	Atp13a1
Cox6c	7.29495e-07	0.153158	0.637	0.583	0.0111678	CD4 Trm	Cox6c
Ppm1k	7.30103e-07	0.965067	0.044	0.024	0.0111771	CD4 Trm	Ppm1k
F2r	7.32559e-07	0.318224	0.166	0.129	0.0112147	CD4 Trm	F2r
Ly6c2	7.45621e-07	1.99885	0.023	0.009	0.0114147	CD4 Trm	Ly6c2
Zc3hav1	7.47039e-07	0.128122	0.642	0.581	0.0114364	CD4 Trm	Zc3hav1
Adh5	7.59101e-07	0.301775	0.204	0.163	0.0116211	CD4 Trm	Adh5
Nif3l1	7.66823e-07	0.596319	0.085	0.058	0.0117393	CD4 Trm	Nif3l1
Pgd	7.70466e-07	0.494694	0.108	0.077	0.0117951	CD4 Trm	Pgd
Lysmd3	8.20552e-07	0.403711	0.152	0.117	0.0125618	CD4 Trm	Lysmd3
Rgs19	8.34364e-07	0.377246	0.151	0.116	0.0127733	CD4 Trm	Rgs19
Dhx16	8.41722e-07	0.517708	0.096	0.067	0.0128859	CD4 Trm	Dhx16
Mcm7	8.46517e-07	0.678669	0.076	0.05	0.0129593	CD4 Trm	Mcm7
Tinf2	8.57785e-07	0.336659	0.205	0.165	0.0131318	CD4 Trm	Tinf2
Ndufc1	8.64258e-07	0.281864	0.184	0.145	0.0132309	CD4 Trm	Ndufc1
Rab5c	8.83447e-07	0.20738	0.305	0.256	0.0135247	CD4 Trm	Rab5c
1700123O20Rik	9.04077e-07	0.44985	0.132	0.099	0.0138405	CD4 Trm	1700123O20Rik
Scp2	9.05183e-07	0.181266	0.436	0.386	0.0138574	CD4 Trm	Scp2
Ifit3	9.08489e-07	1.57212	0.02	0.007	0.0139081	CD4 Trm	Ifit3
Zfp326	9.42046e-07	0.501	0.139	0.106	0.0144218	CD4 Trm	Zfp326
Agbl4	9.47856e-07	1.21255	0.028	0.012	0.0145107	CD4 Trm	Agbl4
Hspa4l	9.53635e-07	0.54987	0.123	0.092	0.0145992	CD4 Trm	Hspa4l
Gskip	9.77062e-07	0.514953	0.079	0.052	0.0149578	CD4 Trm	Gskip
Pdxk	9.83837e-07	0.750141	0.059	0.036	0.0150616	CD4 Trm	Pdxk
Itprip	9.85381e-07	0.69424	0.064	0.041	0.0150852	CD4 Trm	Itprip
Dolpp1	9.85507e-07	1.08054	0.029	0.013	0.0150871	CD4 Trm	Dolpp1
Slain2	9.88257e-07	0.351168	0.175	0.137	0.0151292	CD4 Trm	Slain2
Larp7	9.97296e-07	0.277378	0.214	0.172	0.0152676	CD4 Trm	Larp7
Gm15471	1.00857e-06	2.32132	0.012	0.002	0.0154402	CD4 Trm	Gm15471
Shkbp1	1.01343e-06	0.429597	0.112	0.081	0.0155146	CD4 Trm	Shkbp1
Ccdc71	1.02084e-06	0.696364	0.058	0.035	0.0156281	CD4 Trm	Ccdc71
Zfp68	1.02815e-06	0.404886	0.144	0.109	0.0157399	CD4 Trm	Zfp68
Cyb561d2	1.03051e-06	0.4648	0.101	0.072	0.0157761	CD4 Trm	Cyb561d2
Kdm6a	1.07444e-06	0.336903	0.194	0.155	0.0164485	CD4 Trm	Kdm6a
Snap29	1.08462e-06	0.62583	0.082	0.055	0.0166044	CD4 Trm	Snap29
Abr	1.10587e-06	0.408982	0.125	0.092	0.0169298	CD4 Trm	Abr
Akr1b3	1.11551e-06	0.227599	0.294	0.248	0.0170773	CD4 Trm	Akr1b3
Ip6k2	1.11654e-06	0.565519	0.085	0.058	0.0170931	CD4 Trm	Ip6k2
Dnaja2	1.12724e-06	0.217199	0.346	0.299	0.017257	CD4 Trm	Dnaja2
Ccni	1.13289e-06	0.185759	0.33	0.281	0.0173434	CD4 Trm	Ccni
Ifnar2	1.1348e-06	0.327028	0.182	0.144	0.0173726	CD4 Trm	Ifnar2
Clcc1	1.13631e-06	0.500096	0.075	0.05	0.0173958	CD4 Trm	Clcc1
Ust	1.14125e-06	1.44817	0.019	0.006	0.0174714	CD4 Trm	Ust
Rtf2	1.15306e-06	0.285524	0.22	0.179	0.0176522	CD4 Trm	Rtf2
Tbl2	1.16196e-06	1.39317	0.023	0.009	0.0177885	CD4 Trm	Tbl2
Nhlrc2	1.16455e-06	0.516719	0.084	0.057	0.0178282	CD4 Trm	Nhlrc2
Ubac1	1.17727e-06	0.556127	0.062	0.039	0.0180228	CD4 Trm	Ubac1
Vps45	1.19454e-06	0.756177	0.046	0.026	0.0182872	CD4 Trm	Vps45
Ptrhd1	1.19714e-06	0.583589	0.083	0.056	0.0183271	CD4 Trm	Ptrhd1
Riox2	1.21667e-06	0.566031	0.091	0.064	0.018626	CD4 Trm	Riox2
Rps6ka1	1.2177e-06	0.307402	0.22	0.179	0.0186418	CD4 Trm	Rps6ka1
Vdac1	1.21837e-06	0.343718	0.174	0.137	0.0186521	CD4 Trm	Vdac1
Rsu1	1.22342e-06	0.415219	0.133	0.1	0.0187293	CD4 Trm	Rsu1
Slc25a23	1.22435e-06	1.14807	0.023	0.009	0.0187436	CD4 Trm	Slc25a23
Apeh	1.23256e-06	0.519253	0.095	0.066	0.0188692	CD4 Trm	Apeh
Ugdh	1.24177e-06	0.547906	0.086	0.059	0.0190103	CD4 Trm	Ugdh
Gsk3a	1.24597e-06	0.288367	0.218	0.177	0.0190746	CD4 Trm	Gsk3a
Kbtbd7	1.24787e-06	1.32874	0.022	0.008	0.0191036	CD4 Trm	Kbtbd7
Eif4b	1.25447e-06	0.244325	0.31	0.264	0.0192047	CD4 Trm	Eif4b
Tomm7	1.2865e-06	0.18754	0.484	0.436	0.0196951	CD4 Trm	Tomm7
1810006J02Rik	1.28743e-06	1.07865	0.032	0.016	0.0197093	CD4 Trm	1810006J02Rik
Bloc1s4	1.31145e-06	0.359071	0.143	0.109	0.0200771	CD4 Trm	Bloc1s4
Suclg1	1.33382e-06	0.27202	0.187	0.148	0.0204195	CD4 Trm	Suclg1
Nfrkb	1.33737e-06	0.487855	0.11	0.08	0.0204738	CD4 Trm	Nfrkb
Pea15a	1.33786e-06	0.471859	0.115	0.084	0.0204813	CD4 Trm	Pea15a
Marcksl1	1.34158e-06	0.410966	0.121	0.09	0.0205382	CD4 Trm	Marcksl1
Rnf44	1.34412e-06	0.360979	0.146	0.111	0.0205772	CD4 Trm	Rnf44
Cdkn2d	1.35852e-06	0.622893	0.086	0.059	0.0207976	CD4 Trm	Cdkn2d
Zfp655	1.36505e-06	0.464335	0.119	0.088	0.0208975	CD4 Trm	Zfp655
Osgin2	1.36747e-06	0.851756	0.041	0.022	0.0209346	CD4 Trm	Osgin2
S100a11	1.38529e-06	0.202633	0.764	0.739	0.0212074	CD4 Trm	S100a11
Hells	1.38689e-06	0.669936	0.045	0.026	0.0212318	CD4 Trm	Hells
Tmed4	1.40726e-06	0.488728	0.09	0.062	0.0215438	CD4 Trm	Tmed4
Lrrc8d	1.42017e-06	0.477751	0.13	0.098	0.0217413	CD4 Trm	Lrrc8d
Fam168b	1.4357e-06	0.291568	0.221	0.181	0.0219791	CD4 Trm	Fam168b
Otud1	1.44354e-06	0.720723	0.059	0.037	0.0220991	CD4 Trm	Otud1
Dcaf15	1.44478e-06	0.344264	0.156	0.12	0.0221181	CD4 Trm	Dcaf15
Adi1	1.4462e-06	0.783862	0.056	0.034	0.0221398	CD4 Trm	Adi1
Ttf1	1.46562e-06	0.672706	0.059	0.037	0.0224372	CD4 Trm	Ttf1
Zfp51	1.48107e-06	0.750994	0.052	0.031	0.0226738	CD4 Trm	Zfp51
Hibch	1.49575e-06	0.818501	0.052	0.031	0.0228985	CD4 Trm	Hibch
Uba2	1.50994e-06	0.294954	0.196	0.157	0.0231157	CD4 Trm	Uba2
Ahcyl2	1.52072e-06	0.47357	0.092	0.064	0.0232807	CD4 Trm	Ahcyl2
Ctdp1	1.52248e-06	0.494652	0.084	0.057	0.0233077	CD4 Trm	Ctdp1
Myo9b	1.53922e-06	0.371338	0.141	0.107	0.0235639	CD4 Trm	Myo9b
B3gat3	1.54172e-06	0.44786	0.107	0.078	0.0236022	CD4 Trm	B3gat3
Ranbp10	1.58046e-06	0.594618	0.068	0.044	0.0241952	CD4 Trm	Ranbp10
Trbv20	1.59363e-06	1.16728	0.028	0.013	0.0243969	CD4 Trm	Trbv20
Kremen1	1.59431e-06	0.789667	0.041	0.022	0.0244072	CD4 Trm	Kremen1
Psmc3	1.60685e-06	0.188784	0.348	0.299	0.0245992	CD4 Trm	Psmc3
Rap1a	1.6148e-06	0.141648	0.466	0.41	0.024721	CD4 Trm	Rap1a
Pxk	1.61765e-06	0.346272	0.167	0.13	0.0247646	CD4 Trm	Pxk
Spry2	1.61959e-06	1.25661	0.026	0.011	0.0247943	CD4 Trm	Spry2
Arid2	1.63142e-06	0.527884	0.102	0.073	0.0249754	CD4 Trm	Arid2
Tmem258	1.63379e-06	0.20935	0.375	0.328	0.0250117	CD4 Trm	Tmem258
Cct5	1.63788e-06	0.157915	0.399	0.346	0.0250743	CD4 Trm	Cct5
Fundc2	1.65422e-06	0.296618	0.219	0.179	0.0253244	CD4 Trm	Fundc2
Pgp	1.65653e-06	0.617264	0.074	0.049	0.0253598	CD4 Trm	Pgp
Ola1	1.66378e-06	0.27449	0.219	0.179	0.0254708	CD4 Trm	Ola1
Cox20	1.66775e-06	0.288606	0.234	0.193	0.0255316	CD4 Trm	Cox20
Ecd	1.68041e-06	0.490741	0.085	0.058	0.0257253	CD4 Trm	Ecd
Sass6	1.69608e-06	1.29216	0.022	0.009	0.0259653	CD4 Trm	Sass6
Cnppd1	1.7049e-06	0.243481	0.263	0.22	0.0261004	CD4 Trm	Cnppd1
Pcna	1.70993e-06	0.152563	0.536	0.483	0.0261773	CD4 Trm	Pcna
Lzic	1.72346e-06	0.738763	0.053	0.032	0.0263844	CD4 Trm	Lzic
Pih1d1	1.73096e-06	0.574326	0.08	0.054	0.0264993	CD4 Trm	Pih1d1
Cbx5	1.73114e-06	0.573351	0.072	0.047	0.026502	CD4 Trm	Cbx5
Pknox1	1.75782e-06	0.490641	0.087	0.06	0.0269105	CD4 Trm	Pknox1
Mrpl34	1.7607e-06	0.372482	0.114	0.083	0.0269546	CD4 Trm	Mrpl34
Stard3	1.77275e-06	0.627753	0.072	0.048	0.027139	CD4 Trm	Stard3
Hadha	1.77445e-06	0.221985	0.277	0.233	0.027165	CD4 Trm	Hadha
Pcnt	1.7749e-06	0.401172	0.141	0.108	0.0271719	CD4 Trm	Pcnt
Dipk2a	1.81743e-06	0.63118	0.071	0.047	0.0278231	CD4 Trm	Dipk2a
Adgrg5	1.84232e-06	1.16913	0.028	0.012	0.0282041	CD4 Trm	Adgrg5
Pqbp1	1.84233e-06	0.262792	0.272	0.228	0.0282042	CD4 Trm	Pqbp1
2025-03-07	1.86565e-06	0.184944	0.391	0.342	0.0285612	CD4 Trm	2025-03-07
Tpm3	1.89443e-06	0.16369	0.57	0.526	0.0290018	CD4 Trm	Tpm3
Slc25a17	1.89473e-06	0.515889	0.105	0.076	0.0290064	CD4 Trm	Slc25a17
Tor2a	1.91266e-06	0.401635	0.129	0.097	0.0292809	CD4 Trm	Tor2a
Otud5	1.9231e-06	0.228787	0.288	0.243	0.0294408	CD4 Trm	Otud5
Orc2	1.95926e-06	0.666876	0.074	0.05	0.0299943	CD4 Trm	Orc2
Mterf2	1.96803e-06	1.38318	0.021	0.008	0.0301285	CD4 Trm	Mterf2
Akirin1	1.97709e-06	0.20155	0.282	0.237	0.0302673	CD4 Trm	Akirin1
Ssbp4	1.98505e-06	0.254438	0.213	0.172	0.0303892	CD4 Trm	Ssbp4
Bin1	2.00702e-06	0.277795	0.192	0.153	0.0307255	CD4 Trm	Bin1
Pfdn4	2.01364e-06	0.380105	0.122	0.09	0.0308268	CD4 Trm	Pfdn4
Zfp874a	2.07626e-06	0.746776	0.051	0.03	0.0317854	CD4 Trm	Zfp874a
Ndufs1	2.09943e-06	0.401992	0.117	0.086	0.0321402	CD4 Trm	Ndufs1
Cwc22	2.11241e-06	0.39209	0.122	0.091	0.0323389	CD4 Trm	Cwc22
Pura	2.12496e-06	0.358748	0.154	0.119	0.032531	CD4 Trm	Pura
Ppp2cb	2.13198e-06	0.3232	0.127	0.095	0.0326385	CD4 Trm	Ppp2cb
Ndufs8	2.13413e-06	0.299238	0.227	0.187	0.0326714	CD4 Trm	Ndufs8
Fbxl12	2.15081e-06	0.470527	0.133	0.101	0.0329268	CD4 Trm	Fbxl12
Ptcd3	2.15649e-06	0.596761	0.077	0.052	0.0330138	CD4 Trm	Ptcd3
Lrwd1	2.16992e-06	0.471663	0.095	0.067	0.0332193	CD4 Trm	Lrwd1
Orc5	2.20663e-06	0.854805	0.041	0.023	0.0337812	CD4 Trm	Orc5
Psmd8	2.21362e-06	0.193095	0.392	0.345	0.0338883	CD4 Trm	Psmd8
Naaa	2.22349e-06	1.08625	0.027	0.012	0.0340393	CD4 Trm	Naaa
A430093F15Rik	2.22687e-06	0.389104	0.211	0.174	0.0340911	CD4 Trm	A430093F15Rik
Nr2c2ap	2.24273e-06	0.604251	0.064	0.041	0.0343339	CD4 Trm	Nr2c2ap
Zc3h18	2.25633e-06	0.416829	0.129	0.097	0.0345422	CD4 Trm	Zc3h18
Gm15473	2.27681e-06	1.16621	0.026	0.012	0.0348556	CD4 Trm	Gm15473
Rxrb	2.28465e-06	0.394745	0.145	0.111	0.0349758	CD4 Trm	Rxrb
Dnajc9	2.28549e-06	0.289954	0.168	0.132	0.0349886	CD4 Trm	Dnajc9
Klhl21	2.32413e-06	0.760038	0.054	0.033	0.03558	CD4 Trm	Klhl21
Arl4d	2.34133e-06	1.5411	0.021	0.008	0.0358435	CD4 Trm	Arl4d
Nrarp	2.34402e-06	1.15595	0.024	0.01	0.0358846	CD4 Trm	Nrarp
Slc25a12	2.37817e-06	0.368032	0.119	0.088	0.0364075	CD4 Trm	Slc25a12
Armc8	2.38463e-06	0.54026	0.067	0.043	0.0365063	CD4 Trm	Armc8
Qpct	2.38837e-06	1.65835	0.017	0.005	0.0365636	CD4 Trm	Qpct
Appl2	2.49344e-06	0.68485	0.059	0.037	0.0381721	CD4 Trm	Appl2
Flcn	2.49749e-06	0.41691	0.121	0.09	0.038234	CD4 Trm	Flcn
Psmg4	2.52261e-06	0.374152	0.153	0.119	0.0386186	CD4 Trm	Psmg4
Denr	2.52318e-06	0.284321	0.243	0.203	0.0386274	CD4 Trm	Denr
Zfp729a	2.52711e-06	0.623014	0.056	0.035	0.0386875	CD4 Trm	Zfp729a
Lamtor3	2.54189e-06	0.419906	0.114	0.084	0.0389138	CD4 Trm	Lamtor3
Tox4	2.55743e-06	0.217404	0.3	0.255	0.0391516	CD4 Trm	Tox4
Clec2i	2.5589e-06	0.485595	0.077	0.052	0.0391741	CD4 Trm	Clec2i
Gmps	2.57144e-06	0.31825	0.177	0.141	0.0393662	CD4 Trm	Gmps
Cep95	2.59549e-06	0.441001	0.079	0.053	0.0397344	CD4 Trm	Cep95
Bin3	2.63237e-06	0.389174	0.133	0.101	0.040299	CD4 Trm	Bin3
Akip1	2.63522e-06	0.70785	0.055	0.034	0.0403425	CD4 Trm	Akip1
Mis18a	2.63747e-06	0.448035	0.101	0.072	0.040377	CD4 Trm	Mis18a
Arl6ip4	2.6527e-06	0.379455	0.138	0.106	0.0406102	CD4 Trm	Arl6ip4
Zbtb7b	2.66912e-06	0.541757	0.083	0.057	0.0408615	CD4 Trm	Zbtb7b
Slc25a37	2.69689e-06	0.693312	0.058	0.037	0.0412867	CD4 Trm	Slc25a37
Tmco4	2.74178e-06	0.701181	0.055	0.034	0.0419739	CD4 Trm	Tmco4
Vps4a	2.77932e-06	0.462073	0.097	0.069	0.0425486	CD4 Trm	Vps4a
Ewsr1	2.80396e-06	0.164257	0.429	0.377	0.0429258	CD4 Trm	Ewsr1
Cnot3	2.82194e-06	0.421037	0.14	0.108	0.0432011	CD4 Trm	Cnot3
Chordc1	2.82814e-06	0.339463	0.174	0.139	0.043296	CD4 Trm	Chordc1
Exosc7	2.84137e-06	0.525682	0.076	0.051	0.0434985	CD4 Trm	Exosc7
Borcs6	2.87182e-06	0.602497	0.062	0.04	0.0439647	CD4 Trm	Borcs6
Pex19	2.87523e-06	0.528772	0.08	0.054	0.0440169	CD4 Trm	Pex19
Ube2m	2.9019e-06	0.242501	0.237	0.196	0.0444251	CD4 Trm	Ube2m
Rbmx	2.90945e-06	0.439614	0.111	0.082	0.0445407	CD4 Trm	Rbmx
Rae1	2.91181e-06	0.348783	0.155	0.121	0.0445768	CD4 Trm	Rae1
2810013P06Rik	2.93078e-06	0.469014	0.085	0.059	0.0448673	CD4 Trm	2810013P06Rik
Gm49336	2.93447e-06	0.609877	0.062	0.04	0.0449238	CD4 Trm	Gm49336
Mrpl48	2.93573e-06	0.361272	0.11	0.081	0.0449431	CD4 Trm	Mrpl48
Kat6a	2.93692e-06	0.243953	0.256	0.213	0.0449613	CD4 Trm	Kat6a
Ik	2.97891e-06	0.218842	0.333	0.289	0.0456042	CD4 Trm	Ik
Gpi1	2.9804e-06	0.160711	0.476	0.424	0.045627	CD4 Trm	Gpi1
Epn1	2.98317e-06	0.382107	0.141	0.109	0.0456693	CD4 Trm	Epn1
Alyref	2.9925e-06	0.324282	0.192	0.155	0.0458123	CD4 Trm	Alyref
Prmt5	3.01131e-06	0.755221	0.051	0.031	0.0461001	CD4 Trm	Prmt5
Zfp942	3.03335e-06	0.491322	0.08	0.054	0.0464376	CD4 Trm	Zfp942
Ppp2r2d	3.15554e-06	0.348522	0.181	0.145	0.0483081	CD4 Trm	Ppp2r2d
Acot13	3.19161e-06	0.459257	0.093	0.066	0.0488604	CD4 Trm	Acot13
Ints7	3.20942e-06	0.57753	0.064	0.041	0.049133	CD4 Trm	Ints7
Wdr45	3.21128e-06	0.510867	0.086	0.06	0.0491615	CD4 Trm	Wdr45
Pja1	3.22327e-06	0.372253	0.149	0.116	0.049345	CD4 Trm	Pja1
5830428M24Rik	3.23885e-06	0.787776	0.046	0.027	0.0495835	CD4 Trm	5830428M24Rik
Psmd12	3.29266e-06	0.298119	0.211	0.173	0.0504073	CD4 Trm	Psmd12
Atp6v1e1	3.31918e-06	0.225282	0.32	0.276	0.0508133	CD4 Trm	Atp6v1e1
Mmut	3.34445e-06	0.966381	0.035	0.018	0.0512002	CD4 Trm	Mmut
Timm8b	3.35077e-06	0.309805	0.141	0.108	0.051297	CD4 Trm	Timm8b
Heatr6	3.39127e-06	0.544356	0.074	0.05	0.0519169	CD4 Trm	Heatr6
Fam129c	3.39377e-06	1.16593	0.021	0.008	0.0519553	CD4 Trm	Fam129c
Brd2	3.44007e-06	0.179806	0.499	0.452	0.0526641	CD4 Trm	Brd2
Cdk2	3.44974e-06	0.705334	0.048	0.029	0.052812	CD4 Trm	Cdk2
Msh3	3.45967e-06	0.768395	0.048	0.028	0.052964	CD4 Trm	Msh3
Vps53	3.47498e-06	0.400126	0.126	0.095	0.0531985	CD4 Trm	Vps53
Nrf1	3.48916e-06	0.430712	0.113	0.083	0.0534156	CD4 Trm	Nrf1
Birc5	3.55175e-06	1.31578	0.026	0.012	0.0543737	CD4 Trm	Birc5
Atp5j2	3.61708e-06	0.197048	0.437	0.39	0.0553738	CD4 Trm	Atp5j2
Cnot7	3.68547e-06	0.334347	0.164	0.13	0.0564209	CD4 Trm	Cnot7
Aars	3.74569e-06	0.329813	0.143	0.11	0.0573428	CD4 Trm	Aars
Tceanc2	3.78829e-06	0.635412	0.06	0.038	0.0579949	CD4 Trm	Tceanc2
Rad23a	3.8106e-06	0.352325	0.149	0.116	0.0583365	CD4 Trm	Rad23a
Map2k6	3.85725e-06	0.838125	0.035	0.018	0.0590507	CD4 Trm	Map2k6
Tbc1d4	3.93217e-06	0.20439	0.162	0.127	0.0601977	CD4 Trm	Tbc1d4
R3hdm4	3.95087e-06	0.343954	0.168	0.134	0.0604839	CD4 Trm	R3hdm4
Asna1	3.9823e-06	0.478116	0.097	0.07	0.060965	CD4 Trm	Asna1
Rps6kb2	4.02646e-06	0.6786	0.059	0.038	0.0616411	CD4 Trm	Rps6kb2
Slc37a3	4.14343e-06	0.538556	0.074	0.05	0.0634318	CD4 Trm	Slc37a3
Ndfip2	4.18962e-06	0.304374	0.2	0.163	0.0641389	CD4 Trm	Ndfip2
Becn1	4.23771e-06	0.253856	0.223	0.184	0.0648751	CD4 Trm	Becn1
Helz	4.25645e-06	0.303329	0.191	0.154	0.065162	CD4 Trm	Helz
Hspd1	4.28988e-06	0.125754	0.298	0.25	0.0656737	CD4 Trm	Hspd1
Marf1	4.30592e-06	0.423304	0.098	0.07	0.0659193	CD4 Trm	Marf1
[truncated: 5,839 more rows]
