# Supplementary material for: RORγt+ APCs require a distinct cis-regulatory element to instruct tolerance to dietary antigens
Source: Research Square preprint supplement (doi:10.21203/rs.3.rs-4865841/v1), 2025-08-01
Supplement: Supplementary file 8 [file fc256f2a1f306f8c67d357a7.xlsx]

## Sheet: Table 4. TFBS prediction
Matrix ID	Name	Score	Relative score	Sequence ID	Start	End	Strand	Predicted sequence
UN0540.1	UN0540.1.GCM1::ELF1	16.4712	0.905403	OCR369	127	142	+	cacgcacacggatgtg
MA1149.1	MA1149.1.RARA::RXRG	15.1739	0.909097	OCR369	71	88	+	tgggtcaggtatggggca
UN0599.1	UN0599.1.ZNF19	14.2426	0.857992	OCR369	79	102	+	gtatggggcaggaggtatgactgg
UN0619.1	UN0619.1.ZNF484	13.9613	0.820693	OCR369	308	325	+	agagtacagaggagaagg
MA1974.1	MA1974.1.ZNF211	13.4688	0.883624	OCR369	296	310	+	gtgatataccacaga
MA1731.1	MA1731.1.ZNF768	13.3294	0.87301	OCR369	261	278	+	ggtttccccctctctggt
UN0637.1	UN0637.1.ZNF585A	13.0247	0.883208	OCR369	305	317	+	cacagagtacaga
MA0002.2	MA0002.2.Runx1	12.9249	0.950095	OCR369	171	181	+	gcctgtggttg
UN0620.1	UN0620.1.ZNF485	12.6233	0.868789	OCR369	292	306	+	aagagtgatatacca
MA1981.1	MA1981.1.ZNF530	12.5932	0.848073	OCR369	185	202	+	gctaggccagggcctgag
UN0614.1	UN0614.1.ZNF433	12.55	0.882132	OCR369	104	118	-	gaccgcatggatgac
MA1599.1	MA1599.1.ZNF682	12.5491	0.847604	OCR369	208	223	-	taggccaagccacggt
MA1116.1	MA1116.1.RBPJ	12.0627	0.975653	OCR369	201	210	-	ggtgggaact
UN0646.1	UN0646.1.ZNF662	12.0335	0.845068	OCR369	185	202	+	gctaggccagggcctgag
MA1989.1	MA1989.1.Bcl11B	12.0304	0.884551	OCR369	170	183	-	ggcaaccacaggcc
MA0146.2	MA0146.2.Zfx	11.8528	0.899188	OCR369	187	200	+	taggccagggcctg
MA0002.2	MA0002.2.Runx1	11.7727	0.927631	OCR369	301	311	-	ctctgtggtat
UN0323.1	UN0323.1.ZNF425	11.7642	0.936331	OCR369	190	200	+	gccagggcctg
MA0472.1	MA0472.1.Egr2	11.539	0.884317	OCR369	125	139	+	cacacgcacacggat
MA0686.1	MA0686.1.SPDEF	11.4894	0.90838	OCR369	132	142	+	acacggatgtg
UN0333.1	UN0333.1.ZNF548	11.4658	0.92551	OCR369	20	29	-	gaccctgcca
MA0059.1	MA0059.1.MAX::MYC	11.3561	0.885636	OCR369	232	242	-	aagcaagtggt
MA1535.1	MA1535.1.NR2C1	11.3292	0.989586	OCR369	100	108	+	tggggtcat
MA0159.1	MA0159.1.RARA::RXRA	11.273	0.825359	OCR369	72	88	+	gggtcaggtatggggca
UN0664.1	UN0664.1.ZNF860	11.2275	0.855614	OCR369	330	344	-	cctttgctcctaccc
UN0596.1	UN0596.1.ZNF132	11.0702	0.856222	OCR369	155	169	+	gggaagaggtaggga
MA0035.4	MA0035.4.GATA1	11.0625	0.920951	OCR369	219	229	+	gcctaatctcc
MA0155.1	MA0155.1.INSM1	11.0452	0.875706	OCR369	96	107	+	tgactggggtca
MA0146.2	MA0146.2.Zfx	11.0433	0.885099	OCR369	187	200	-	caggccctggccta
UN0684.1	UN0684.1.Zfp985	11.0189	0.854939	OCR369	63	75	+	accagcaatgggt
MA0080.6	MA0080.6.Spi1	10.9743	0.812816	OCR369	149	165	+	ggagaagggaagaggta
MA0648.1	MA0648.1.GSC	10.9666	0.944328	OCR369	220	229	+	cctaatctcc
MA0047.2	MA0047.2.Foxa2	10.9004	0.896537	OCR369	117	128	-	tgtgtacactga
MA1110.2	MA1110.2.Nr1H4	10.899	0.96198	OCR369	248	257	-	ataggtcacc
UN0678.1	UN0678.1.Zfp456	10.863	0.838025	OCR369	19	34	+	atggcagggtcttact
UN0131.1	UN0131.1.MESP2	10.8257	0.896014	OCR369	250	261	-	caacataggtca
MA1996.1	MA1996.1.Nr1H2	10.8207	0.943121	OCR369	248	258	-	cataggtcacc
UN0650.1	UN0650.1.ZNF7	10.781	0.920873	OCR369	230	240	+	ctaccacttgc
MA1723.1	MA1723.1.PRDM9	10.7287	0.815071	OCR369	70	93	+	atgggtcaggtatggggcaggagg
UN0542.1	UN0542.1.GCM1::ELK3	10.7039	0.823376	OCR369	126	141	+	acacgcacacggatgt
UN0508.1	UN0508.1.ERF::TBX21	10.6437	0.8834	OCR369	49	60	-	taacccaggaac
MA0002.1	MA0002.1.RUNX1	10.6188	0.904478	OCR369	37	47	+	cactgtggtaa
MA1111.1	MA1111.1.NR2F2	10.6094	0.902935	OCR369	248	258	-	cataggtcacc
UN0317.1	UN0317.1.ZNF18	10.5619	0.882805	OCR369	200	212	-	acggtgggaactc
UN0222.1	UN0222.1.ZNF765	10.4988	0.81367	OCR369	49	65	-	ggtcctaacccaggaac
UN0332.1	UN0332.1.ZNF534	10.4968	0.868185	OCR369	81	93	-	cctcctgccccat
MA0869.2	MA0869.2.Sox11	10.4615	0.886746	OCR369	334	345	+	aggagcaaaggc
MA0891.1	MA0891.1.GSC2	10.4149	0.945028	OCR369	220	229	+	cctaatctcc
MA0669.1	MA0669.1.NEUROG2	10.3865	0.895587	OCR369	251	260	-	aacataggtc
MA0136.2	MA0136.2.ELF5	10.3706	0.907174	OCR369	132	142	+	acacggatgtg
MA0069.1	MA0069.1.PAX6	10.3515	0.824322	OCR369	287	300	-	atcactcttcagtg
UN0614.1	UN0614.1.ZNF433	10.3462	0.85374	OCR369	92	106	-	gaccccagtcatacc
MA1965.1	MA1965.1.SP5	10.3355	0.929537	OCR369	164	173	-	ggcctcccta
MA1989.1	MA1989.1.Bcl11B	10.3258	0.847678	OCR369	299	312	+	atataccacagagt
MA0258.2	MA0258.2.ESR2	10.3214	0.866121	OCR369	241	255	-	aggtcacccagaaaa
UN0610.1	UN0610.1.ZNF337	10.2786	0.924995	OCR369	144	155	-	cttctccaagag
UN0308.1	UN0308.1.ESR2	10.2691	0.901871	OCR369	247	258	-	cataggtcaccc
UN0681.1	UN0681.1.Zfp683	10.2278	0.807157	OCR369	228	245	+	ccctaccacttgcttttc
MA0081.2	MA0081.2.SPIB	10.2133	0.818429	OCR369	150	165	-	tacctcttcccttctc
MA0080.6	MA0080.6.Spi1	10.2094	0.801906	OCR369	231	247	-	cagaaaagcaagtggta
MA0852.2	MA0852.2.FOXK1	10.1781	0.861655	OCR369	119	132	+	agtgtacacacgca
UN0538.1	UN0538.1.FOXS1	10.143	0.869705	OCR369	119	130	+	agtgtacacacg
MA1468.1	MA1468.1.ATOH7	10.1335	0.917516	OCR369	251	260	-	aacataggtc
MA0528.2	MA0528.2.ZNF263	10.1218	0.866572	OCR369	82	93	+	tggggcaggagg
MA0071.1	MA0071.1.RORA	10.0727	0.881492	OCR369	250	259	-	acataggtca
MA1981.1	MA1981.1.ZNF530	10.0499	0.815969	OCR369	74	91	+	gtcaggtatggggcagga
MA1150.1	MA1150.1.RORB	10.0269	0.894758	OCR369	249	259	-	acataggtcac
MA0081.2	MA0081.2.SPIB	10.0122	0.815591	OCR369	231	246	+	taccacttgcttttct
MA1987.1	MA1987.1.ZNF701	10.0061	0.808055	OCR369	259	279	-	gaccagagagggggaaaccaa
MA0511.2	MA0511.2.RUNX2	9.96105	0.908479	OCR369	173	181	-	caaccacag
MA1536.1	MA1536.1.NR2C2	9.94405	0.994807	OCR369	101	108	+	ggggtcat
UN0196.1	UN0196.1.ZNF479	9.93383	0.851571	OCR369	100	112	-	atggatgacccca
MA0806.1	MA0806.1.TBX4	9.92099	0.924757	OCR369	355	362	+	aagtgtta
UN0662.1	UN0662.1.ZNF799	9.89582	0.805661	OCR369	209	224	-	ttaggccaagccacgg
MA0714.1	MA0714.1.PITX3	9.88954	0.932054	OCR369	220	228	+	cctaatctc
UN0650.1	UN0650.1.ZNF7	9.88682	0.896929	OCR369	353	363	-	gtaacacttgg
MA1615.1	MA1615.1.Plagl1	9.8709	0.853156	OCR369	97	109	+	gactggggtcatc
UN0610.1	UN0610.1.ZNF337	9.8564	0.917528	OCR369	50	61	-	ctaacccaggaa
MA1627.1	MA1627.1.Wt1	9.83461	0.835735	OCR369	79	92	-	ctcctgccccatac
MA1103.2	MA1103.2.FOXK2	9.80598	0.88948	OCR369	120	130	+	gtgtacacacg
MA0124.1	MA0124.1.NKX3-1	9.80297	0.936115	OCR369	30	36	+	ttactta
MA0047.3	MA0047.3.FOXA2	9.78831	0.891397	OCR369	120	130	+	gtgtacacacg
UN0593.1	UN0593.1.ZNF100	9.73177	0.835386	OCR369	132	146	+	acacggatgtggctc
MA0684.2	MA0684.2.RUNX3	9.72991	0.885	OCR369	171	182	-	gcaaccacaggc
MA0002.1	MA0002.1.RUNX1	9.71918	0.881175	OCR369	301	311	-	ctctgtggtat
MA1991.1	MA1991.1.Hnf1A	9.68212	0.847125	OCR369	333	346	-	agcctttgctccta
UN0514.1	UN0514.1.ETV2::FOXI1	9.67279	0.877686	OCR369	133	144	+	cacggatgtggc
UN0159.1	UN0159.1.ZNF100	9.6532	0.825816	OCR369	202	215	+	gttcccaccgtggc
MA1683.1	MA1683.1.FOXA3	9.65018	0.88778	OCR369	120	130	+	gtgtacacacg
MA1535.1	MA1535.1.NR2C1	9.64812	0.957213	OCR369	249	257	-	ataggtcac
MA1653.1	MA1653.1.ZNF148	9.61177	0.842308	OCR369	265	276	+	tccccctctctg
MA1731.1	MA1731.1.ZNF768	9.61176	0.820232	OCR369	259	276	+	ttggtttccccctctctg
MA0017.2	MA0017.2.NR2F1	9.61039	0.875804	OCR369	246	258	-	cataggtcaccca
MA0006.1	MA0006.1.Ahr::Arnt	9.60282	1	OCR369	127	132	-	tgcgtg
MA0695.1	MA0695.1.ZBTB7C	9.60172	0.857223	OCR369	171	182	-	gcaaccacaggc
MA0471.2	MA0471.2.E2F6	9.59605	0.859103	OCR369	201	213	-	cacggtgggaact
MA0136.3	MA0136.3.Elf5	9.58959	0.867236	OCR369	233	244	-	aaaagcaagtgg
MA2002.1	MA2002.1.Zfp335	9.58144	0.89086	OCR369	178	188	-	tagcaggcaac
MA0598.3	MA0598.3.EHF	9.56104	0.829331	OCR369	232	246	+	accacttgcttttct
MA1990.1	MA1990.1.Gli1	9.55734	0.829827	OCR369	244	257	-	ataggtcacccaga
UN0513.1	UN0513.1.ETV2::FOXI1	9.53628	0.800172	OCR369	113	129	+	gcggtcagtgtacacac
MA0807.1	MA0807.1.TBX5	9.53085	0.9141	OCR369	323	330	+	aggtgttg
MA0672.1	MA0672.1.NKX2-3	9.51562	0.919495	OCR369	352	361	-	aacacttggg
UN0550.1	UN0550.1.GCM1::TBX21	9.49694	0.819845	OCR369	323	338	+	aggtgttgggtaggag
MA0909.2	MA0909.2.HOXD13	9.46794	0.87404	OCR369	357	367	-	ggcagtaacac
MA1728.1	MA1728.1.ZNF549	9.45391	0.855777	OCR369	82	93	-	cctcctgcccca
MA0017.2	MA0017.2.NR2F1	9.43873	0.873238	OCR369	99	111	+	ctggggtcatcca
MA0146.2	MA0146.2.Zfx	9.43534	0.85711	OCR369	210	223	+	cgtggcttggccta
MA0160.1	MA0160.1.NR4A2	9.42687	0.922285	OCR369	249	256	-	taggtcac
MA0162.4	MA0162.4.EGR1	9.42013	0.824479	OCR369	126	139	+	acacgcacacggat
UN0530.1	UN0530.1.FLI1::FOXI1	9.41852	0.861502	OCR369	133	145	+	cacggatgtggct
MA0160.2	MA0160.2.NR4A2	9.4153	0.877857	OCR369	250	259	-	acataggtca
MA0640.2	MA0640.2.ELF3	9.40892	0.837996	OCR369	231	244	+	taccacttgctttt
MA1523.1	MA1523.1.MSANTD3	9.39496	0.887261	OCR369	116	125	-	gtacactgac
MA0768.2	MA0768.2.Lef1	9.36616	0.825096	OCR369	334	347	-	cagcctttgctcct
MA0480.2	MA0480.2.Foxo1	9.33327	0.887347	OCR369	120	130	+	gtgtacacacg
MA1122.1	MA1122.1.TFDP1	9.29241	0.870853	OCR369	201	211	-	cggtgggaact
MA0730.1	MA0730.1.RARA	9.28197	0.810358	OCR369	72	88	+	gggtcaggtatggggca
MA0682.1	MA0682.1.Pitx1	9.27939	0.925813	OCR369	221	228	+	ctaatctc
MA0511.2	MA0511.2.RUNX2	9.26005	0.895557	OCR369	111	119	-	tgaccgcat
MA0733.1	MA0733.1.EGR4	9.23907	0.812568	OCR369	126	141	+	acacgcacacggatgt
MA1567.2	MA1567.2.Tbx6	9.23887	0.853599	OCR369	201	212	-	acggtgggaact
MA0596.1	MA0596.1.SREBF2	9.22096	0.857726	OCR369	99	108	+	ctggggtcat
MA1421.1	MA1421.1.TCF7L1	9.20379	0.80774	OCR369	333	344	+	taggagcaaagg
MA1645.1	MA1645.1.NKX2-2	9.19959	0.855989	OCR369	283	296	+	gggccactgaagag
MA0502.2	MA0502.2.NFYB	9.18415	0.846516	OCR369	282	293	-	ttcagtggccct
MA1710.1	MA1710.1.ZNF257	9.18059	0.87537	OCR369	158	169	+	aagaggtaggga
MA1535.1	MA1535.1.NR2C1	9.16972	0.948	OCR369	70	78	+	atgggtcag
MA1567.1	MA1567.1.TBX6	9.1432	0.899661	OCR369	322	331	+	aaggtgttgg
MA0801.1	MA0801.1.MGA	9.13557	0.90835	OCR369	355	362	+	aagtgtta
MA0528.2	MA0528.2.ZNF263	9.13258	0.847022	OCR369	152	163	+	gaagggaagagg
MA0483.1	MA0483.1.Gfi1B	9.12774	0.878986	OCR369	171	181	-	caaccacaggc
MA1960.1	MA1960.1.MGA::EVX1	9.11401	0.851092	OCR369	355	366	+	aagtgttactgc
MA0806.1	MA0806.1.TBX4	9.10402	0.908284	OCR369	323	330	+	aggtgttg
UN0227.1	UN0227.1.ZNF780A	9.10122	0.866491	OCR369	83	92	-	ctcctgcccc
UN0516.1	UN0516.1.ETV2::FOXO6	9.09507	0.857022	OCR369	133	145	+	cacggatgtggct
MA0783.1	MA0783.1.PKNOX2	9.08833	0.83629	OCR369	96	107	+	tgactggggtca
MA1117.1	MA1117.1.RELB	9.08338	0.85988	OCR369	261	271	+	ggtttccccct
UN0649.1	UN0649.1.ZNF681	9.06391	0.811418	OCR369	338	351	+	gcaaaggctgtgga
MA0478.1	MA0478.1.FOSL2	9.06272	0.898451	OCR369	68	78	+	caatgggtcag
MA0002.2	MA0002.2.Runx1	9.06074	0.874758	OCR369	270	280	+	ctctctggtct
UN0537.1	UN0537.1.FOXP4	9.04087	0.876114	OCR369	120	130	+	gtgtacacacg
MA0626.1	MA0626.1.Npas2	9.01089	0.90155	OCR369	352	361	+	cccaagtgtt
MA1107.2	MA1107.2.KLF9	9.01055	0.801274	OCR369	121	136	+	tgtacacacgcacacg
UN0646.1	UN0646.1.ZNF662	9.00874	0.805765	OCR369	166	183	+	gggaggcctgtggttgcc
MA0807.1	MA0807.1.TBX5	9.00789	0.900586	OCR369	355	362	+	aagtgtta
UN0670.1	UN0670.1.Arid1A	8.98389	0.85154	OCR369	121	133	+	tgtacacacgcac
MA1536.1	MA1536.1.NR2C2	8.96659	0.976956	OCR369	249	256	-	taggtcac
MA0002.2	MA0002.2.Runx1	8.96399	0.872872	OCR369	37	47	+	cactgtggtaa
MA0065.2	MA0065.2.Pparg::Rxra	8.95918	0.816616	OCR369	81	95	+	atggggcaggaggta
MA0693.3	MA0693.3.Vdr	8.95824	0.884104	OCR369	307	317	+	cagagtacaga
MA1151.1	MA1151.1.RORC	8.94371	0.873968	OCR369	250	261	-	caacataggtca
MA0162.1	MA0162.1.Egr1	8.94269	0.832075	OCR369	128	138	-	tccgtgtgcgt
MA1631.1	MA1631.1.ASCL1	8.9416	0.856853	OCR369	83	95	-	tacctcctgcccc
MA0484.2	MA0484.2.HNF4G	8.93776	0.82961	OCR369	305	317	+	cacagagtacaga
MA2001.1	MA2001.1.Six4	8.92273	0.854044	OCR369	43	53	-	ggaaccttacc
MA0062.3	MA0062.3.GABPA	8.89009	0.817338	OCR369	232	245	+	accacttgcttttc
UN0143.1	UN0143.1.ZBTB20	8.87964	0.90052	OCR369	249	260	+	gtgacctatgtt
MA0014.1	MA0014.1.Pax5	8.86936	0.80238	OCR369	283	302	+	gggccactgaagagtgatat
MA1150.1	MA1150.1.RORB	8.85961	0.868881	OCR369	98	108	+	actggggtcat
UN0160.1	UN0160.1.ZNF101	8.84561	0.837881	OCR369	96	107	+	tgactggggtca
MA0481.3	MA0481.3.FOXP1	8.84535	0.873365	OCR369	120	130	+	gtgtacacacg
UN0605.1	UN0605.1.ZNF264	8.84148	0.915858	OCR369	341	349	+	aaggctgtg
MA1725.1	MA1725.1.ZNF189	8.83241	0.828439	OCR369	59	71	-	attgctggtccta
UN0323.1	UN0323.1.ZNF425	8.82129	0.870729	OCR369	279	289	+	cttagggccac
MA0162.4	MA0162.4.EGR1	8.81395	0.813879	OCR369	124	137	+	acacacgcacacgg
UN0616.1	UN0616.1.ZNF462	8.81144	0.873779	OCR369	180	190	-	cctagcaggca
MA1602.1	MA1602.1.ZSCAN29	8.80175	0.85556	OCR369	117	128	-	tgtgtacactga
UN0596.1	UN0596.1.ZNF132	8.7994	0.823487	OCR369	148	162	+	tggagaagggaagag
MA0037.4	MA0037.4.Gata3	8.79068	0.85094	OCR369	1	12	+	ggtcatatctcc
MA0114.4	MA0114.4.HNF4A	8.78505	0.82219	OCR369	305	317	+	cacagagtacaga
MA0665.1	MA0665.1.MSC	8.75707	0.828294	OCR369	320	329	-	aacaccttct
MA0682.2	MA0682.2.PITX1	8.75075	0.919842	OCR369	221	228	+	ctaatctc
MA1110.1	MA1110.1.NR1H4	8.72907	0.839963	OCR369	113	123	-	acactgaccgc
MA0769.1	MA0769.1.Tcf7	8.72889	0.819128	OCR369	333	344	+	taggagcaaagg
MA1724.1	MA1724.1.Rfx6	8.70078	0.822507	OCR369	47	59	-	aacccaggaacct
MA1628.1	MA1628.1.Zic1::Zic2	8.69948	0.885391	OCR369	180	190	-	cctagcaggca
MA0482.2	MA0482.2.GATA4	8.6811	0.845741	OCR369	218	229	+	ggcctaatctcc
MA0036.3	MA0036.3.GATA2	8.67543	0.881341	OCR369	2	12	+	gtcatatctcc
MA0461.2	MA0461.2.Atoh1	8.67056	0.886004	OCR369	251	260	+	gacctatgtt
UN0610.1	UN0610.1.ZNF337	8.65818	0.896335	OCR369	141	152	+	tggctcttggag
MA0805.1	MA0805.1.TBX1	8.65258	0.887685	OCR369	355	362	+	aagtgtta
MA0734.3	MA0734.3.Gli2	8.64789	0.833177	OCR369	244	256	-	taggtcacccaga
MA1558.1	MA1558.1.SNAI1	8.64343	0.901837	OCR369	232	241	-	agcaagtggt
MA0087.2	MA0087.2.Sox5	8.63498	0.823944	OCR369	63	75	+	accagcaatgggt
UN0196.1	UN0196.1.ZNF479	8.62226	0.827641	OCR369	91	103	+	aggtatgactggg
MA0669.1	MA0669.1.NEUROG2	8.61972	0.866266	OCR369	251	260	+	gacctatgtt
MA0150.1	MA0150.1.NFE2L2	8.58415	0.815067	OCR369	14	24	+	atgagatggca
MA1710.1	MA1710.1.ZNF257	8.57346	0.865819	OCR369	39	50	+	ctgtggtaaggt
MA1630.1	MA1630.1.Znf281	8.57041	0.836099	OCR369	80	90	+	tatggggcagg
MA2002.1	MA2002.1.Zfp335	8.56484	0.863365	OCR369	193	203	-	actcaggccct
UN0511.1	UN0511.1.ETV2::EOMES	8.56356	0.846519	OCR369	48	60	-	taacccaggaacc
UN0589.1	UN0589.1.ZFP69B	8.55667	0.85593	OCR369	83	91	+	ggggcagga
UN0547.1	UN0547.1.GCM1::HOXB13	8.53808	0.805199	OCR369	56	70	-	ttgctggtcctaacc
MA0528.2	MA0528.2.ZNF263	8.53116	0.835137	OCR369	328	339	+	ttgggtaggagc
UN0134.1	UN0134.1.RHOXF2	8.52049	0.922172	OCR369	221	228	+	ctaatctc
UN0556.1	UN0556.1.GLI4	8.50916	0.874566	OCR369	191	202	+	ccagggcctgag
MA0155.1	MA0155.1.INSM1	8.50839	0.822524	OCR369	78	89	+	ggtatggggcag
UN0237.1	UN0237.1.ZNF821	8.5076	0.80588	OCR369	121	135	+	tgtacacacgcacac
MA0528.2	MA0528.2.ZNF263	8.50044	0.83453	OCR369	163	174	+	gtagggaggcct
MA1554.1	MA1554.1.RFX7	8.48746	0.903124	OCR369	358	366	+	tgttactgc
UN0565.1	UN0565.1.HOXB2::TBX3	8.48469	0.827952	OCR369	355	366	+	aagtgttactgc
UN0685.1	UN0685.1.Zfpm1	8.47883	0.875753	OCR369	170	180	-	aaccacaggcc
MA0672.1	MA0672.1.NKX2-3	8.47048	0.901556	OCR369	232	241	+	accacttgct
MA0595.1	MA0595.1.SREBF1	8.45567	0.854556	OCR369	99	108	-	atgaccccag
MA1110.1	MA1110.1.NR1H4	8.45563	0.833297	OCR369	101	111	-	tggatgacccc
MA1730.1	MA1730.1.ZNF708	8.45454	0.807852	OCR369	134	148	+	acggatgtggctctt
UN0515.1	UN0515.1.ETV2::FOXI1	8.45408	0.817252	OCR369	346	359	+	tgtggacccaagtg
MA0002.1	MA0002.1.RUNX1	8.44507	0.848174	OCR369	171	181	+	gcctgtggttg
MA1657.1	MA1657.1.ZNF652	8.40614	0.823083	OCR369	353	364	+	ccaagtgttact
MA0037.3	MA0037.3.GATA3	8.39237	0.914183	OCR369	220	227	-	agattagg
UN0587.1	UN0587.1.ZBTB21	8.37979	0.892784	OCR369	110	119	-	tgaccgcatg
MA1534.1	MA1534.1.NR1I3	8.37915	0.904446	OCR369	249	257	+	gtgacctat
UN0651.1	UN0651.1.ZNF714	8.37845	0.845312	OCR369	62	73	+	gaccagcaatgg
MA0711.1	MA0711.1.OTX1	8.37688	0.922644	OCR369	221	228	+	ctaatctc
UN0312.1	UN0312.1.ZBTB42	8.37173	0.848636	OCR369	133	144	+	cacggatgtggc
MA1970.1	MA1970.1.TRPS1	8.37022	0.832985	OCR369	1	12	+	ggtcatatctcc
MA0079.2	MA0079.2.SP1	8.35934	0.841819	OCR369	83	92	-	ctcctgcccc
MA1649.1	MA1649.1.ZBTB12	8.32219	0.859836	OCR369	47	57	-	cccaggaacct
MA1536.1	MA1536.1.NR2C2	8.31664	0.965087	OCR369	71	78	+	tgggtcag
UN0685.1	UN0685.1.Zfpm1	8.30851	0.872187	OCR369	195	205	-	gaactcaggcc
MA1131.1	MA1131.1.FOSL2::JUN	8.30805	0.834862	OCR369	99	109	-	gatgaccccag
MA0511.2	MA0511.2.RUNX2	8.30639	0.877979	OCR369	301	309	+	ataccacag
MA1648.1	MA1648.1.TCF12	8.30193	0.865415	OCR369	84	94	-	acctcctgccc
MA1524.1	MA1524.1.MSGN1	8.28696	0.890813	OCR369	231	242	+	taccacttgctt
MA0157.3	MA0157.3.Foxo3	8.28469	0.854316	OCR369	120	131	+	gtgtacacacgc
MA0461.2	MA0461.2.Atoh1	8.27741	0.878527	OCR369	251	260	-	aacataggtc
MA0136.3	MA0136.3.Elf5	8.27443	0.842063	OCR369	152	163	+	gaagggaagagg
UN0650.1	UN0650.1.ZNF7	8.27306	0.853714	OCR369	321	331	-	ccaacaccttc
MA1531.1	MA1531.1.NR1D1	8.26884	0.853008	OCR369	47	61	+	aggttcctgggttag
MA0063.2	MA0063.2.NKX2-5	8.26483	0.869881	OCR369	285	295	+	gccactgaaga
MA1112.2	MA1112.2.NR4A1	8.25465	0.857364	OCR369	248	259	-	acataggtcacc
MA0849.1	MA0849.1.FOXO6	8.23405	0.914005	OCR369	122	128	+	gtacaca
MA0763.1	MA0763.1.ETV3	8.23307	0.84267	OCR369	133	142	+	cacggatgtg
MA0036.3	MA0036.3.GATA2	8.2198	0.87199	OCR369	219	229	+	gcctaatctcc
MA0626.1	MA0626.1.Npas2	8.21631	0.885198	OCR369	232	241	-	agcaagtggt
MA1952.1	MA1952.1.FOXJ2::ELF1	8.20659	0.820648	OCR369	240	253	-	gtcacccagaaaag
MA1606.1	MA1606.1.Foxf1	8.20392	0.859398	OCR369	120	130	+	gtgtacacacg
UN0253.1	UN0253.1.Lyl1	8.19949	0.800246	OCR369	230	245	-	gaaaagcaagtggtag
UN0601.1	UN0601.1.ZNF213	8.18006	0.821294	OCR369	192	206	-	ggaactcaggccctg
UN0642.1	UN0642.1.ZNF614	8.17889	0.801391	OCR369	213	224	-	ttaggccaagcc
MA0111.1	MA0111.1.Spz1	8.16676	0.829605	OCR369	329	339	+	tgggtaggagc
UN0536.1	UN0536.1.FOXO1::ELK1	8.14639	0.825515	OCR369	133	145	+	cacggatgtggct
MA0037.3	MA0037.3.GATA3	8.1384	0.908343	OCR369	3	10	-	agatatga
UN0653.1	UN0653.1.ZNF736	8.13808	0.856086	OCR369	188	198	-	ggccctggcct
MA0748.2	MA0748.2.YY2	8.138	0.839504	OCR369	17	27	+	agatggcaggg
MA0625.2	MA0625.2.NFATC3	8.12404	0.918085	OCR369	201	209	-	gtgggaact
MA0472.2	MA0472.2.EGR2	8.10934	0.843477	OCR369	128	138	+	acgcacacgga
MA0684.2	MA0684.2.RUNX3	8.03288	0.84721	OCR369	300	311	+	tataccacagag
MA1710.1	MA1710.1.ZNF257	8.02623	0.857211	OCR369	314	325	+	cagaggagaagg
MA1547.2	MA1547.2.PITX2	8.02506	0.898372	OCR369	221	228	+	ctaatctc
MA0471.2	MA0471.2.E2F6	8.02217	0.830077	OCR369	82	94	+	tggggcaggaggt
MA0161.2	MA0161.2.NFIC	8.01305	0.852898	OCR369	213	223	+	ggcttggccta
MA0124.2	MA0124.2.Nkx3-1	7.99163	0.871603	OCR369	232	240	+	accacttgc
MA0640.2	MA0640.2.ELF3	7.99142	0.811302	OCR369	85	98	-	tcatacctcctgcc
UN0670.1	UN0670.1.Arid1A	7.98443	0.832327	OCR369	127	139	+	cacgcacacggat
MA1480.1	MA1480.1.DPRX	7.97363	0.86005	OCR369	219	228	+	gcctaatctc
MA1567.1	MA1567.1.TBX6	7.97073	0.874451	OCR369	354	363	+	caagtgttac
MA0673.1	MA0673.1.NKX2-8	7.96329	0.914535	OCR369	352	360	-	acacttggg
MA0632.2	MA0632.2.TCFL5	7.92894	0.892595	OCR369	126	135	+	acacgcacac
MA1624.1	MA1624.1.Stat5a	7.92298	0.828043	OCR369	142	153	-	tctccaagagcc
UN0227.1	UN0227.1.ZNF780A	7.9158	0.845375	OCR369	19	28	-	accctgccat
MA0130.1	MA0130.1.ZNF354C	7.91578	0.956231	OCR369	347	352	-	gtccac
MA0623.2	MA0623.2.NEUROG1	7.91343	0.8834	OCR369	251	260	+	gacctatgtt
MA1563.2	MA1563.2.SOX18	7.89768	0.917852	OCR369	354	361	-	aacacttg
MA0482.1	MA0482.1.Gata4	7.89592	0.885312	OCR369	3	13	+	tcatatctcct
MA1501.1	MA1501.1.HOXB7	7.88855	0.876028	OCR369	29	38	-	tgtaagtaag
MA0623.2	MA0623.2.NEUROG1	7.88819	0.883033	OCR369	251	260	-	aacataggtc
MA0152.1	MA0152.1.NFATC2	7.88577	0.871874	OCR369	148	154	-	ttctcca
UN0160.1	UN0160.1.ZNF101	7.88076	0.820962	OCR369	36	47	+	acactgtggtaa
UN0607.1	UN0607.1.ZNF273	7.88018	0.859805	OCR369	21	32	-	taagaccctgcc
MA1524.1	MA1524.1.MSGN1	7.87516	0.883275	OCR369	231	242	-	aagcaagtggta
UN0614.1	UN0614.1.ZNF433	7.86952	0.821831	OCR369	350	364	+	gacccaagtgttact
MA1979.1	MA1979.1.ZNF416	7.86519	0.806078	OCR369	242	252	+	tttctgggtga
UN0653.1	UN0653.1.ZNF736	7.86254	0.849847	OCR369	169	179	-	accacaggcct
MA0712.2	MA0712.2.OTX2	7.84925	0.862006	OCR369	219	230	-	gggagattaggc
MA0820.1	MA0820.1.FIGLA	7.84581	0.87245	OCR369	320	329	-	aacaccttct
MA1982.1	MA1982.1.ZNF574	7.84079	0.804214	OCR369	266	280	-	agaccagagaggggg
MA0508.3	MA0508.3.PRDM1	7.83946	0.84642	OCR369	317	327	-	caccttctcct
UN0653.1	UN0653.1.ZNF736	7.82596	0.849019	OCR369	194	204	-	aactcaggccc
MA1508.1	MA1508.1.IKZF1	7.82463	0.819187	OCR369	48	59	-	aacccaggaacc
UN0238.1	UN0238.1.ZNF823	7.81518	0.818513	OCR369	266	277	-	ccagagaggggg
MA0511.2	MA0511.2.RUNX2	7.81491	0.868919	OCR369	39	47	-	ttaccacag
MA0482.1	MA0482.1.Gata4	7.80976	0.884073	OCR369	220	230	+	cctaatctccc
MA0259.1	MA0259.1.ARNT::HIF1A	7.80945	0.89888	OCR369	126	133	-	gtgcgtgt
UN0657.1	UN0657.1.ZNF778	7.79346	0.809316	OCR369	101	118	+	ggggtcatccatgcggtc
MA0079.2	MA0079.2.SP1	7.78181	0.827275	OCR369	149	158	-	tcccttctcc
MA0830.2	MA0830.2.TCF4	7.77023	0.828822	OCR369	83	95	-	tacctcctgcccc
MA0693.2	MA0693.2.VDR	7.75974	0.884754	OCR369	100	107	+	tggggtca
MA1565.1	MA1565.1.TBX18	7.73111	0.809539	OCR369	202	213	-	cacggtgggaac
MA0140.1	MA0140.1.Gata1::Tal1	7.72712	0.813443	OCR369	4	21	-	catctcataggagatatg
UN0674.1	UN0674.1.Hand1	7.72534	0.816111	OCR369	167	179	-	accacaggcctcc
MA0473.3	MA0473.3.ELF1	7.70535	0.801144	OCR369	232	245	-	gaaaagcaagtggt
MA1724.1	MA1724.1.Rfx6	7.70419	0.802942	OCR369	180	192	-	ggcctagcaggca
MA0140.1	MA0140.1.Gata1::Tal1	7.70375	0.81304	OCR369	221	238	-	aagtggtagggagattag
MA0887.1	MA0887.1.EVX1	7.69793	0.897764	OCR369	220	229	-	ggagattagg
UN0327.1	UN0327.1.ZNF468	7.69551	0.803172	OCR369	263	276	+	tttccccctctctg
MA0848.1	MA0848.1.FOXO4	7.68615	0.900608	OCR369	122	128	+	gtacaca
MA1118.1	MA1118.1.SIX1	7.68595	0.812905	OCR369	43	53	-	ggaaccttacc
UN0174.1	UN0174.1.ZNF284	7.68115	0.826638	OCR369	80	91	+	tatggggcagga
MA1116.1	MA1116.1.RBPJ	7.62208	0.882834	OCR369	40	49	+	tgtggtaagg
MA0671.1	MA0671.1.NFIX	7.62196	0.924946	OCR369	215	223	-	taggccaag
MA0719.1	MA0719.1.RHOXF1	7.62152	0.951187	OCR369	221	228	+	ctaatctc
MA1524.2	MA1524.2.Msgn1	7.59435	0.804618	OCR369	229	244	-	aaaagcaagtggtagg
MA0014.3	MA0014.3.PAX5	7.58855	0.819793	OCR369	245	256	+	ctgggtgaccta
MA0047.2	MA0047.2.Foxa2	7.58071	0.842991	OCR369	31	42	+	tacttacactgt
MA0802.1	MA0802.1.TBR1	7.55247	0.846394	OCR369	355	364	+	aagtgttact
MA0625.2	MA0625.2.NFATC3	7.54875	0.904683	OCR369	261	269	-	ggggaaacc
MA0516.3	MA0516.3.SP2	7.54625	0.85634	OCR369	83	91	+	ggggcagga
MA0888.1	MA0888.1.EVX2	7.54594	0.897364	OCR369	220	229	-	ggagattagg
MA0673.1	MA0673.1.NKX2-8	7.54159	0.90691	OCR369	233	241	+	ccacttgct
MA1580.1	MA1580.1.ZBTB32	7.5391	0.858437	OCR369	117	126	-	tgtacactga
MA1524.1	MA1524.1.MSGN1	7.53363	0.877023	OCR369	351	362	+	acccaagtgtta
MA0693.3	MA0693.3.Vdr	7.52542	0.849055	OCR369	198	208	+	ctgagttccca
MA1558.1	MA1558.1.SNAI1	7.5098	0.881433	OCR369	320	329	+	agaaggtgtt
MA1657.1	MA1657.1.ZNF652	7.50003	0.806096	OCR369	290	301	+	tgaagagtgata
MA0684.2	MA0684.2.RUNX3	7.48739	0.835063	OCR369	37	48	-	cttaccacagtg
MA1478.1	MA1478.1.DMRTA2	7.48604	0.834171	OCR369	355	366	+	aagtgttactgc
MA0489.2	MA0489.2.Jun	7.47936	0.839926	OCR369	68	79	-	cctgacccattg
MA0474.3	MA0474.3.Erg	7.47803	0.805423	OCR369	232	245	-	gaaaagcaagtggt
UN0121.1	UN0121.1.FEZF1	7.47315	0.833996	OCR369	337	347	+	agcaaaggctg
MA0688.1	MA0688.1.TBX2	7.47202	0.835589	OCR369	354	364	+	caagtgttact
MA1621.1	MA1621.1.Rbpjl	7.4659	0.828348	OCR369	318	331	-	ccaacaccttctcc
MA0775.1	MA0775.1.MEIS3	7.44485	0.893913	OCR369	19	26	+	atggcagg
MA0088.2	MA0088.2.ZNF143	7.4403	0.822798	OCR369	203	218	+	ttcccaccgtggcttg
MA1708.1	MA1708.1.ETV7	7.4397	0.853649	OCR369	132	142	+	acacggatgtg
UN0674.1	UN0674.1.Hand1	7.43755	0.809833	OCR369	75	87	-	gccccatacctga
MA0808.1	MA0808.1.TEAD3	7.43224	0.907452	OCR369	91	98	-	tcatacct
MA0761.2	MA0761.2.ETV1	7.42928	0.801591	OCR369	84	97	+	gggcaggaggtatg
UN0578.1	UN0578.1.POU2F1::ELK1	7.42652	0.827566	OCR369	237	249	-	cccagaaaagcaa
MA1971.1	MA1971.1.ZBED2	7.41617	0.824307	OCR369	258	271	-	agggggaaaccaac
MA1607.1	MA1607.1.Foxl2	7.39428	0.804441	OCR369	117	130	+	tcagtgtacacacg
MA1615.1	MA1615.1.Plagl1	7.39367	0.801957	OCR369	346	358	-	acttgggtccaca
MA0803.1	MA0803.1.TBX15	7.391	0.862139	OCR369	355	362	+	aagtgtta
MA2003.1	MA2003.1.NKX2-4	7.38374	0.868491	OCR369	288	297	-	actcttcagt
MA1147.1	MA1147.1.NR4A2::RXRA	7.37085	0.802486	OCR369	341	355	+	aaggctgtggaccca
UN0218.1	UN0218.1.ZNF750	7.36692	0.817189	OCR369	195	207	-	gggaactcaggcc
UN0616.1	UN0616.1.ZNF462	7.36196	0.842121	OCR369	85	95	+	ggcaggaggta
MA0597.2	MA0597.2.THAP1	7.3612	0.821269	OCR369	189	200	+	ggccagggcctg
MA1150.1	MA1150.1.RORB	7.35113	0.83544	OCR369	216	226	-	gattaggccaa
MA0522.3	MA0522.3.TCF3	7.34756	0.850606	OCR369	84	94	-	acctcctgccc
MA0098.2	MA0098.2.Ets1	7.34262	0.819962	OCR369	232	246	+	accacttgcttttct
MA0130.1	MA0130.1.ZNF354C	7.33082	0.930628	OCR369	175	180	-	aaccac
MA0071.1	MA0071.1.RORA	7.32449	0.805623	OCR369	68	77	+	caatgggtca
MA0807.1	MA0807.1.TBX5	7.32098	0.856995	OCR369	91	98	+	aggtatga
MA0002.2	MA0002.2.Runx1	7.316	0.840742	OCR369	136	146	+	ggatgtggctc
MA0615.1	MA0615.1.Gmeb1	7.31178	0.832644	OCR369	25	41	-	cagtgtaagtaagaccc
MA0750.2	MA0750.2.ZBTB7A	7.29664	0.809864	OCR369	132	144	+	acacggatgtggc
MA0079.2	MA0079.2.SP1	7.27113	0.814413	OCR369	266	275	+	ccccctctct
MA1151.1	MA1151.1.RORC	7.26842	0.840298	OCR369	66	77	+	agcaatgggtca
MA1565.1	MA1565.1.TBX18	7.26337	0.800147	OCR369	89	100	+	ggaggtatgact
MA0522.3	MA0522.3.TCF3	7.24142	0.848286	OCR369	319	329	-	aacaccttctc
MA1631.1	MA1631.1.ASCL1	7.2327	0.825337	OCR369	318	330	-	caacaccttctcc
MA0146.2	MA0146.2.Zfx	7.22701	0.818672	OCR369	181	194	+	gcctgctaggccag
MA1707.1	MA1707.1.DMRTA1	7.20572	0.835242	OCR369	355	366	+	aagtgttactgc
MA1994.1	MA1994.1.Nkx2-1	7.19652	0.821194	OCR369	349	361	-	aacacttgggtcc
MA0693.2	MA0693.2.VDR	7.19295	0.868593	OCR369	308	315	+	agagtaca
MA0492.1	MA0492.1.JUND	7.19153	0.871329	OCR369	98	112	-	atggatgaccccagt
UN0596.1	UN0596.1.ZNF132	7.1819	0.80017	OCR369	158	172	+	aagaggtagggaggc
MA0504.1	MA0504.1.NR2C2	7.17991	0.811155	OCR369	152	166	+	gaagggaagaggtag
MA1618.1	MA1618.1.Ptf1a	7.17928	0.825524	OCR369	132	144	+	acacggatgtggc
MA1558.1	MA1558.1.SNAI1	7.17214	0.875355	OCR369	74	83	+	gtcaggtatg
MA0515.1	MA0515.1.Sox6	7.16991	0.851174	OCR369	335	344	-	cctttgctcc
MA1523.1	MA1523.1.MSANTD3	7.1694	0.832228	OCR369	120	129	+	gtgtacacac
UN0227.1	UN0227.1.ZNF780A	7.16927	0.832077	OCR369	180	189	+	tgcctgctag
UN0556.1	UN0556.1.GLI4	7.16858	0.852662	OCR369	282	293	+	agggccactgaa
MA0766.2	MA0766.2.GATA5	7.161	0.896283	OCR369	219	228	-	gagattaggc
MA1648.1	MA1648.1.TCF12	7.14484	0.837932	OCR369	319	329	-	aacaccttctc
MA0148.4	MA0148.4.FOXA1	7.14224	0.815958	OCR369	120	131	+	gtgtacacacgc
MA0738.1	MA0738.1.HIC2	7.1405	0.887593	OCR369	202	210	+	gttcccacc
MA1655.1	MA1655.1.ZNF341	7.12603	0.809157	OCR369	236	247	-	cagaaaagcaag
MA0895.1	MA0895.1.HMBOX1	7.11629	0.857156	OCR369	29	38	+	cttacttaca
UN0150.1	UN0150.1.ZBTB45	7.10923	0.851428	OCR369	250	260	+	tgacctatgtt
MA0098.2	MA0098.2.Ets1	7.09787	0.816411	OCR369	83	97	-	catacctcctgcccc
UN0200.1	UN0200.1.ZNF524	7.09081	0.822197	OCR369	328	339	-	gctcctacccaa
MA1717.1	MA1717.1.ZNF784	7.08541	0.831183	OCR369	113	123	-	acactgaccgc
MA0678.1	MA0678.1.OLIG2	7.07401	0.853048	OCR369	251	260	-	aacataggtc
UN0218.1	UN0218.1.ZNF750	7.0699	0.810923	OCR369	170	182	-	gcaaccacaggcc
MA0147.3	MA0147.3.MYC	7.06912	0.81543	OCR369	231	242	+	taccacttgctt
MA1142.1	MA1142.1.FOSL1::JUND	7.05516	0.83702	OCR369	70	79	-	cctgacccat
MA0037.4	MA0037.4.Gata3	7.05186	0.811822	OCR369	218	229	+	ggcctaatctcc
MA0079.5	MA0079.5.SP1	7.05017	0.841396	OCR369	83	91	+	ggggcagga
MA1122.1	MA1122.1.TFDP1	7.04872	0.822203	OCR369	262	272	-	gagggggaaac
MA1523.1	MA1523.1.MSANTD3	7.04327	0.829109	OCR369	284	293	+	ggccactgaa
UN0682.1	UN0682.1.Zfp809	7.03156	0.839845	OCR369	95	105	-	accccagtcat
MA0719.1	MA0719.1.RHOXF1	7.02341	0.939659	OCR369	141	148	-	aagagcca
UN0308.1	UN0308.1.ESR2	7.01355	0.830847	OCR369	111	122	+	atgcggtcagtg
MA0092.1	MA0092.1.Hand1::Tcf3	7.0077	0.830049	OCR369	73	82	+	ggtcaggtat
MA0122.2	MA0122.2.NKX3-2	6.98475	0.854313	OCR369	232	240	+	accacttgc
MA0058.3	MA0058.3.MAX	6.96758	0.864301	OCR369	232	241	+	accacttgct
MA0801.1	MA0801.1.MGA	6.96424	0.868852	OCR369	323	330	+	aggtgttg
MA1150.1	MA1150.1.RORB	6.9622	0.826818	OCR369	68	78	+	caatgggtcag
MA0850.1	MA0850.1.FOXP3	6.95594	0.890695	OCR369	31	37	-	gtaagta
MA1984.1	MA1984.1.ZNF667	6.94732	0.801124	OCR369	332	343	+	gtaggagcaaag
MA0471.2	MA0471.2.E2F6	6.94229	0.810162	OCR369	149	161	+	ggagaagggaaga
MA1110.2	MA1110.2.Nr1H4	6.94046	0.881154	OCR369	112	121	+	tgcggtcagt
MA1628.1	MA1628.1.Zic1::Zic2	6.93928	0.854478	OCR369	85	95	+	ggcaggaggta
MA0845.1	MA0845.1.FOXB1	6.93784	0.833427	OCR369	30	40	-	agtgtaagtaa
MA0741.1	MA0741.1.KLF16	6.93701	0.824343	OCR369	125	135	+	cacacgcacac
MA0825.1	MA0825.1.MNT	6.93414	0.852178	OCR369	232	241	+	accacttgct
MA0471.2	MA0471.2.E2F6	6.92584	0.809859	OCR369	262	274	-	gagagggggaaac
MA0482.2	MA0482.2.GATA4	6.92332	0.809235	OCR369	237	248	+	ttgcttttctgg
MA0474.2	MA0474.2.ERG	6.91524	0.856015	OCR369	133	142	+	cacggatgtg
MA0764.3	MA0764.3.ETV4	6.91284	0.845782	OCR369	133	142	+	cacggatgtg
MA0482.2	MA0482.2.GATA4	6.91273	0.809015	OCR369	1	12	+	ggtcatatctcc
MA1579.1	MA1579.1.ZBTB26	6.91162	0.813365	OCR369	238	252	-	tcacccagaaaagca
MA0642.2	MA0642.2.EN2	6.91058	0.881149	OCR369	68	75	-	acccattg
MA0037.4	MA0037.4.Gata3	6.91009	0.808633	OCR369	237	248	+	ttgcttttctgg
UN0330.1	UN0330.1.ZNF513	6.90436	0.848406	OCR369	159	168	+	agaggtaggg
MA0740.2	MA0740.2.KLF14	6.9039	0.854152	OCR369	83	91	+	ggggcagga
MA1104.2	MA1104.2.GATA6	6.90339	0.803552	OCR369	217	229	+	tggcctaatctcc
MA0160.1	MA0160.1.NR4A2	6.88484	0.832967	OCR369	282	289	+	agggccac
UN0658.1	UN0658.1.ZNF783	6.881	0.818542	OCR369	166	176	+	gggaggcctgt
MA1632.1	MA1632.1.ATF2	6.87281	0.827392	OCR369	109	121	+	ccatgcggtcagt
MA0688.1	MA0688.1.TBX2	6.87236	0.824126	OCR369	322	332	+	aaggtgttggg
MA0472.1	MA0472.1.Egr2	6.87146	0.820531	OCR369	123	137	+	tacacacgcacacgg
UN0485.1	UN0485.1.ALX4::TBX21	6.86892	0.831621	OCR369	355	366	+	aagtgttactgc
MA0827.1	MA0827.1.OLIG3	6.86682	0.857806	OCR369	251	260	-	aacataggtc
MA0498.1	MA0498.1.Meis1	6.86623	0.816888	OCR369	112	126	+	tgcggtcagtgtaca
MA0693.2	MA0693.2.VDR	6.86294	0.859183	OCR369	348	355	-	tgggtcca
MA0103.3	MA0103.3.ZEB1	6.86289	0.86374	OCR369	73	83	-	catacctgacc
MA0616.1	MA0616.1.Hes2	6.86134	0.807461	OCR369	233	245	-	gaaaagcaagtgg
MA1621.1	MA1621.1.Rbpjl	6.85782	0.815845	OCR369	350	363	-	gtaacacttgggtc
MA0650.2	MA0650.2.HOXA13	6.85609	0.830614	OCR369	240	250	-	acccagaaaag
MA0862.1	MA0862.1.GMEB2	6.85407	0.846331	OCR369	30	37	-	gtaagtaa
MA0803.1	MA0803.1.TBX15	6.84765	0.852647	OCR369	323	330	+	aggtgttg
MA1483.2	MA1483.2.ELF2	6.84401	0.851001	OCR369	131	142	+	cacacggatgtg
UN0323.1	UN0323.1.ZNF425	6.83937	0.826549	OCR369	21	31	+	ggcagggtctt
MA0017.2	MA0017.2.NR2F1	6.83852	0.834365	OCR369	69	81	+	aatgggtcaggta
MA0104.3	MA0104.3.Mycn	6.83823	0.862608	OCR369	232	239	+	accacttg
MA0099.2	MA0099.2.FOS::JUN	6.83623	0.860281	OCR369	71	77	-	tgaccca
MA0098.3	MA0098.3.ETS1	6.83598	0.848114	OCR369	133	142	+	cacggatgtg
MA1581.1	MA1581.1.ZBTB6	6.8353	0.80162	OCR369	140	152	-	ctccaagagccac
MA0817.1	MA0817.1.BHLHE23	6.82922	0.848437	OCR369	250	261	-	caacataggtca
MA2001.1	MA2001.1.Six4	6.82648	0.80288	OCR369	73	83	-	catacctgacc
UN0588.1	UN0588.1.ZFP64	6.82379	0.833376	OCR369	191	199	-	aggccctgg
MA1132.1	MA1132.1.JUN::JUNB	6.82298	0.820718	OCR369	70	79	-	cctgacccat
MA0442.1	MA0442.1.SOX10	6.81243	0.906887	OCR369	36	41	-	cagtgt
MA0442.1	MA0442.1.SOX10	6.81243	0.906887	OCR369	118	123	+	cagtgt
MA0875.1	MA0875.1.BARX1	6.80724	0.903974	OCR369	221	228	-	gagattag
MA0100.2	MA0100.2.Myb	6.80518	0.859873	OCR369	359	368	+	gttactgcca
MA0668.1	MA0668.1.NEUROD2	6.79705	0.875841	OCR369	108	117	-	accgcatgga
MA0632.2	MA0632.2.TCFL5	6.79691	0.877427	OCR369	124	133	+	acacacgcac
MA0869.2	MA0869.2.Sox11	6.7963	0.820043	OCR369	309	320	+	gagtacagagga
MA1535.1	MA1535.1.NR2C1	6.79465	0.902262	OCR369	112	120	+	tgcggtcag
MA1102.2	MA1102.2.CTCFL	6.78458	0.811805	OCR369	78	89	+	ggtatggggcag
MA0146.2	MA0146.2.Zfx	6.78039	0.810898	OCR369	162	175	+	ggtagggaggcctg
MA0002.2	MA0002.2.Runx1	6.77014	0.8301	OCR369	97	107	+	gactggggtca
UN0605.1	UN0605.1.ZNF264	6.76376	0.873643	OCR369	134	142	+	acggatgtg
MA0693.2	MA0693.2.VDR	6.7474	0.855889	OCR369	199	206	+	tgagttcc
MA0147.2	MA0147.2.Myc	6.74358	0.873798	OCR369	233	242	+	ccacttgctt
MA0913.1	MA0913.1.Hoxd9	6.74101	0.841078	OCR369	28	37	-	gtaagtaaga
UN0312.1	UN0312.1.ZBTB42	6.7371	0.816633	OCR369	312	323	+	tacagaggagaa
MA1655.1	MA1655.1.ZNF341	6.73028	0.800484	OCR369	140	151	-	tccaagagccac
MA0031.1	MA0031.1.FOXD1	6.72136	0.805293	OCR369	122	129	+	gtacacac
MA1474.1	MA1474.1.CREB3L4	6.72083	0.800865	OCR369	134	145	-	agccacatccgt
MA0508.3	MA0508.3.PRDM1	6.70841	0.824691	OCR369	148	158	-	tcccttctcca
MA0079.2	MA0079.2.SP1	6.7054	0.800166	OCR369	267	276	+	cccctctctg
MA1512.1	MA1512.1.KLF11	6.69708	0.841919	OCR369	125	135	+	cacacgcacac
MA0143.3	MA0143.3.Sox2	6.69299	0.870982	OCR369	253	260	+	cctatgtt
MA0143.3	MA0143.3.Sox2	6.69299	0.870982	OCR369	337	344	-	cctttgct
MA0014.3	MA0014.3.PAX5	6.69209	0.800954	OCR369	101	112	-	atggatgacccc
MA1650.1	MA1650.1.ZBTB14	6.68651	0.804975	OCR369	126	137	+	acacgcacacgg
MA0676.1	MA0676.1.Nr2e1	6.67943	0.831012	OCR369	249	257	-	ataggtcac
MA0067.1	MA0067.1.Pax2	6.67738	0.906209	OCR369	294	301	-	tatcactc
UN0308.1	UN0308.1.ESR2	6.67297	0.823417	OCR369	69	80	+	aatgggtcaggt
MA0797.1	MA0797.1.TGIF2	6.67028	0.809168	OCR369	96	107	+	tgactggggtca
MA0813.1	MA0813.1.TFAP2B	6.6581	0.819104	OCR369	180	192	-	ggcctagcaggca
MA0018.2	MA0018.2.CREB1	6.65618	0.820101	OCR369	100	107	-	tgacccca
MA0101.1	MA0101.1.REL	6.64999	0.806427	OCR369	101	110	+	ggggtcatcc
MA0803.1	MA0803.1.TBX15	6.64072	0.849033	OCR369	91	98	+	aggtatga
MA0673.1	MA0673.1.NKX2-8	6.63718	0.890556	OCR369	289	297	-	actcttcag
MA1994.1	MA1994.1.Nkx2-1	6.62484	0.809602	OCR369	232	244	+	accacttgctttt
MA1961.1	MA1961.1.PATZ1	6.61831	0.823146	OCR369	266	277	-	ccagagaggggg
UN0659.1	UN0659.1.ZNF786	6.61685	0.835546	OCR369	169	179	-	accacaggcct
MA0816.1	MA0816.1.Ascl2	6.61569	0.812718	OCR369	320	329	-	aacaccttct
MA0140.2	MA0140.2.GATA1::TAL1	6.61292	0.807605	OCR369	173	190	-	cctagcaggcaaccacag
MA0593.1	MA0593.1.FOXP2	6.61089	0.834418	OCR369	120	130	+	gtgtacacacg
MA1928.1	MA1928.1.BNC2	6.60769	0.810746	OCR369	68	79	+	caatgggtcagg
MA1639.1	MA1639.1.MEIS1	6.60759	0.808353	OCR369	291	303	-	tatatcactcttc
MA0739.1	MA0739.1.Hic1	6.59405	0.851013	OCR369	17	25	-	ctgccatct
MA0079.5	MA0079.5.SP1	6.59358	0.833462	OCR369	84	92	+	gggcaggag
MA0079.5	MA0079.5.SP1	6.59358	0.833462	OCR369	330	338	+	gggtaggag
MA1710.1	MA1710.1.ZNF257	6.5921	0.83465	OCR369	81	92	+	atggggcaggag
MA0899.1	MA0899.1.HOXA10	6.57203	0.83221	OCR369	357	367	-	ggcagtaacac
MA1644.1	MA1644.1.NFYC	6.56546	0.80886	OCR369	94	104	-	ccccagtcata
MA0047.2	MA0047.2.Foxa2	6.55799	0.826494	OCR369	346	357	+	tgtggacccaag
MA0147.2	MA0147.2.Myc	6.5527	0.870996	OCR369	109	118	+	ccatgcggtc
MA0813.1	MA0813.1.TFAP2B	6.54954	0.817488	OCR369	180	192	+	tgcctgctaggcc
MA1142.1	MA1142.1.FOSL1::JUND	6.53974	0.823144	OCR369	69	78	+	aatgggtcag
MA0872.1	MA0872.1.TFAP2A	6.52709	0.810393	OCR369	204	216	-	agccacggtggga
MA0160.1	MA0160.1.NR4A2	6.52681	0.820388	OCR369	274	281	-	aagaccag
MA1108.2	MA1108.2.MXI1	6.5185	0.885838	OCR369	129	138	+	cgcacacgga
MA1620.1	MA1620.1.Ptf1A	6.51673	0.813763	OCR369	319	330	-	caacaccttctc
MA1650.1	MA1650.1.ZBTB14	6.51437	0.801846	OCR369	124	135	+	acacacgcacac
MA1151.1	MA1151.1.RORC	6.5132	0.82512	OCR369	217	228	-	gagattaggcca
MA1099.1	MA1099.1.Hes1	6.50534	0.846022	OCR369	129	138	+	cgcacacgga
MA0685.2	MA0685.2.SP4	6.49547	0.843391	OCR369	84	92	+	gggcaggag
MA0685.2	MA0685.2.SP4	6.49547	0.843391	OCR369	330	338	+	gggtaggag
MA1621.1	MA1621.1.Rbpjl	6.49542	0.808393	OCR369	72	85	-	cccatacctgaccc
MA0895.1	MA0895.1.HMBOX1	6.49027	0.844045	OCR369	258	267	+	gttggtttcc
MA0152.1	MA0152.1.NFATC2	6.48721	0.820291	OCR369	262	268	+	gtttccc
UN0609.1	UN0609.1.ZNF333	6.48692	0.859718	OCR369	165	173	+	agggaggcc
MA0846.1	MA0846.1.FOXC2	6.4855	0.834471	OCR369	255	266	-	gaaaccaacata
UN0317.1	UN0317.1.ZNF18	6.48386	0.808427	OCR369	120	132	-	tgcgtgtgtacac
MA0597.2	MA0597.2.THAP1	6.47986	0.804005	OCR369	150	161	+	gagaagggaaga
MA1624.1	MA1624.1.Stat5a	6.47897	0.800859	OCR369	241	252	-	tcacccagaaaa
MA0132.1	MA0132.1.Pdx1	6.47812	0.872768	OCR369	221	226	+	ctaatc
MA0663.1	MA0663.1.MLX	6.47141	0.805703	OCR369	232	241	-	agcaagtggt
MA0039.4	MA0039.4.KLF4	6.46869	0.804009	OCR369	341	352	-	gtccacagcctt
MA1996.1	MA1996.1.Nr1H2	6.46513	0.84577	OCR369	99	109	+	ctggggtcatc
MA1620.1	MA1620.1.Ptf1A	6.46292	0.812637	OCR369	351	362	-	taacacttgggt
MA1132.1	MA1132.1.JUN::JUNB	6.44891	0.812274	OCR369	248	257	+	ggtgacctat
MA1960.1	MA1960.1.MGA::EVX1	6.44112	0.809118	OCR369	25	36	+	gggtcttactta
UN0175.1	UN0175.1.ZNF296	6.43361	0.834589	OCR369	111	121	+	atgcggtcagt
MA0143.3	MA0143.3.Sox2	6.42593	0.866244	OCR369	66	73	-	ccattgct
MA0818.2	MA0818.2.BHLHE22	6.4243	0.86052	OCR369	251	260	-	aacataggtc
MA0664.1	MA0664.1.MLXIPL	6.42163	0.811821	OCR369	232	241	-	agcaagtggt
MA0152.1	MA0152.1.NFATC2	6.42094	0.817847	OCR369	155	161	-	tcttccc
MA0767.1	MA0767.1.GCM2	6.41232	0.82227	OCR369	255	264	+	tatgttggtt
MA0767.1	MA0767.1.GCM2	6.40787	0.822179	OCR369	110	119	+	catgcggtca
MA0136.3	MA0136.3.Elf5	6.3971	0.806132	OCR369	85	96	+	ggcaggaggtat
MA1996.1	MA1996.1.Nr1H2	6.39134	0.844121	OCR369	111	121	+	atgcggtcagt
MA1717.1	MA1717.1.ZNF784	6.37814	0.81881	OCR369	160	170	-	ctccctacctc
MA0827.1	MA0827.1.OLIG3	6.36334	0.849433	OCR369	251	260	+	gacctatgtt
UN0175.1	UN0175.1.ZNF296	6.35966	0.833083	OCR369	119	129	-	gtgtgtacact
UN0139.1	UN0139.1.YBX1	6.35555	0.877186	OCR369	137	145	-	agccacatc
MA0766.2	MA0766.2.GATA5	6.35416	0.883283	OCR369	2	11	-	gagatatgac
UN0659.1	UN0659.1.ZNF786	6.35101	0.830391	OCR369	49	59	-	aacccaggaac
MA1630.2	MA1630.2.ZNF281	6.34471	0.811437	OCR369	83	94	+	ggggcaggaggt
MA0160.1	MA0160.1.NR4A2	6.34173	0.813885	OCR369	216	223	-	taggccaa
MA0767.1	MA0767.1.GCM2	6.3417	0.820827	OCR369	125	134	-	tgtgcgtgtg
MA0805.1	MA0805.1.TBX1	6.33325	0.846972	OCR369	91	98	+	aggtatga
MA0077.1	MA0077.1.SOX9	6.32844	0.808673	OCR369	65	73	-	ccattgctg
MA1988.1	MA1988.1.Atf3	6.3246	0.826395	OCR369	69	79	-	cctgacccatt
MA1568.1	MA1568.1.TCF21	6.31891	0.829456	OCR369	250	261	-	caacataggtca
MA1570.1	MA1570.1.TFAP4	6.31762	0.858227	OCR369	251	260	-	aacataggtc
MA1111.1	MA1111.1.NR2F2	6.30416	0.809858	OCR369	69	79	+	aatgggtcagg
MA1522.1	MA1522.1.MAZ	6.29751	0.846341	OCR369	265	275	+	tccccctctct
MA0872.1	MA0872.1.TFAP2A	6.28234	0.806634	OCR369	204	216	+	tcccaccgtggct
MA0774.1	MA0774.1.MEIS2	6.28229	0.839025	OCR369	19	26	+	atggcagg
MA1578.1	MA1578.1.VEZF1	6.27518	0.83638	OCR369	266	275	+	ccccctctct
MA0146.2	MA0146.2.Zfx	6.26257	0.801885	OCR369	168	181	-	caaccacaggcctc
MA0042.2	MA0042.2.FOXI1	6.25875	0.866963	OCR369	122	128	+	gtacaca
MA0469.1	MA0469.1.E2F3	6.25354	0.817631	OCR369	203	217	+	ttcccaccgtggctt
MA0671.1	MA0671.1.NFIX	6.25234	0.892702	OCR369	187	195	+	taggccagg
MA0826.1	MA0826.1.OLIG1	6.24869	0.860573	OCR369	251	260	-	aacataggtc
MA2002.1	MA2002.1.Zfp335	6.24764	0.800694	OCR369	73	83	+	ggtcaggtatg
MA1108.2	MA1108.2.MXI1	6.24696	0.880764	OCR369	123	132	+	tacacacgca
MA1536.1	MA1536.1.NR2C2	6.24579	0.927269	OCR369	54	61	+	tgggttag
MA0164.1	MA0164.1.Nr2e3	6.23971	0.806196	OCR369	45	51	+	taaggtt
UN0131.1	UN0131.1.MESP2	6.22887	0.836658	OCR369	250	261	+	tgacctatgttg
MA1570.1	MA1570.1.TFAP4	6.2282	0.85652	OCR369	251	260	+	gacctatgtt
MA0671.1	MA0671.1.NFIX	6.22744	0.892116	OCR369	18	26	-	cctgccatc
MA0032.2	MA0032.2.FOXC1	6.22632	0.846954	OCR369	30	40	-	agtgtaagtaa
MA0164.1	MA0164.1.Nr2e3	6.22121	0.805536	OCR369	46	52	-	gaacctt
MA1648.1	MA1648.1.TCF12	6.21359	0.815813	OCR369	232	242	+	accacttgctt
UN0227.1	UN0227.1.ZNF780A	6.20873	0.814968	OCR369	160	169	-	tccctacctc
MA0722.1	MA0722.1.VAX1	6.17826	0.855491	OCR369	30	37	+	ttacttac
UN0602.1	UN0602.1.ZNF222	6.17484	0.800297	OCR369	126	136	+	acacgcacacg
MA0698.1	MA0698.1.ZBTB18	6.17379	0.830825	OCR369	131	143	+	cacacggatgtgg
MA0124.2	MA0124.2.Nkx3-1	6.16492	0.836605	OCR369	353	361	-	aacacttgg
MA0522.3	MA0522.3.TCF3	6.15832	0.824613	OCR369	232	242	+	accacttgctt
MA0845.1	MA0845.1.FOXB1	6.15742	0.821141	OCR369	119	129	+	agtgtacacac
MA1523.1	MA1523.1.MSANTD3	6.15723	0.8072	OCR369	198	207	-	gggaactcag
MA0493.1	MA0493.1.Klf1	6.1485	0.815554	OCR369	342	352	-	gtccacagcct
MA0876.1	MA0876.1.BSX	6.13964	0.893912	OCR369	221	228	-	gagattag
MA0623.1	MA0623.1.Neurog1	6.1295	0.845038	OCR369	251	260	+	gacctatgtt
MA0122.2	MA0122.2.NKX3-2	6.12624	0.83634	OCR369	353	361	-	aacacttgg
MA0442.2	MA0442.2.SOX10	6.12379	0.825099	OCR369	335	345	+	ggagcaaaggc
MA1986.1	MA1986.1.ZNF692	6.1186	0.84568	OCR369	346	355	-	tgggtccaca
UN0175.1	UN0175.1.ZNF296	6.11179	0.828037	OCR369	118	128	+	cagtgtacaca
MA0004.1	MA0004.1.Arnt	6.11163	0.830853	OCR369	234	239	+	cacttg
MA0004.1	MA0004.1.Arnt	6.11163	0.830853	OCR369	234	239	-	caagtg
MA0004.1	MA0004.1.Arnt	6.11163	0.830853	OCR369	354	359	+	caagtg
MA0004.1	MA0004.1.Arnt	6.11163	0.830853	OCR369	354	359	-	cacttg
UN0651.1	UN0651.1.ZNF714	6.09435	0.8088	OCR369	357	368	-	tggcagtaacac
MA1505.1	MA1505.1.HOXC8	6.0906	0.89818	OCR369	67	74	-	cccattgc
MA1936.1	MA1936.1.ERF::FOXO1	6.08813	0.804718	OCR369	240	253	-	gtcacccagaaaag
MA1468.1	MA1468.1.ATOH7	6.08307	0.843027	OCR369	170	179	-	accacaggcc
UN0245.1	UN0245.1.ZSCAN20	6.07642	0.817964	OCR369	241	253	-	gtcacccagaaaa
UN0653.1	UN0653.1.ZNF736	6.07615	0.809399	OCR369	49	59	-	aacccaggaac
MA0815.1	MA0815.1.TFAP2C	6.07447	0.820628	OCR369	180	192	-	ggcctagcaggca
MA1120.1	MA1120.1.SOX13	6.06853	0.816921	OCR369	65	75	+	cagcaatgggt
MA0678.1	MA0678.1.OLIG2	6.0677	0.836806	OCR369	251	260	+	gacctatgtt
UN0659.1	UN0659.1.ZNF786	6.06731	0.824891	OCR369	194	204	-	aactcaggccc
MA0867.2	MA0867.2.SOX4	6.05931	0.84912	OCR369	336	345	+	gagcaaaggc
MA1467.2	MA1467.2.Atoh1	6.05915	0.827582	OCR369	14	24	+	atgagatggca
MA1099.1	MA1099.1.Hes1	6.0557	0.830813	OCR369	123	132	+	tacacacgca
MA0067.1	MA0067.1.Pax2	6.05224	0.881661	OCR369	209	216	-	agccacgg
MA0594.2	MA0594.2.HOXA9	6.05114	0.864721	OCR369	2	11	+	gtcatatctc
MA0668.1	MA0668.1.NEUROD2	6.04877	0.863613	OCR369	251	260	+	gacctatgtt
MA0634.1	MA0634.1.ALX3	6.02833	0.8318	OCR369	29	38	+	cttacttaca
MA0145.2	MA0145.2.Tfcp2l1	6.02761	0.818915	OCR369	172	185	+	cctgtggttgcctg
MA1554.1	MA1554.1.RFX7	6.01884	0.848342	OCR369	177	185	+	ggttgcctg
UN0653.1	UN0653.1.ZNF736	6.01868	0.808098	OCR369	95	105	-	accccagtcat
MA0152.1	MA0152.1.NFATC2	6.01624	0.802921	OCR369	317	323	-	ttctcct
MA0819.2	MA0819.2.CLOCK	5.99958	0.842101	OCR369	353	362	-	taacacttgg
MA1536.1	MA1536.1.NR2C2	5.99228	0.922639	OCR369	113	120	+	gcggtcag
MA1638.1	MA1638.1.HAND2	5.98742	0.871043	OCR369	133	142	+	cacggatgtg
MA0623.1	MA0623.1.Neurog1	5.98723	0.841735	OCR369	108	117	+	tccatgcggt
MA0498.2	MA0498.2.MEIS1	5.98722	0.907537	OCR369	95	101	+	atgactg
MA1517.1	MA1517.1.KLF6	5.98639	0.829263	OCR369	124	134	+	acacacgcaca
MA0062.2	MA0062.2.Gabpa	5.9802	0.811941	OCR369	134	144	+	acggatgtggc
MA1151.1	MA1151.1.RORC	5.97684	0.81434	OCR369	241	252	+	ttttctgggtga
MA0442.2	MA0442.2.SOX10	5.97171	0.821836	OCR369	252	262	-	ccaacataggt
UN0143.1	UN0143.1.ZBTB20	5.96858	0.853987	OCR369	74	85	+	gtcaggtatggg
MA0095.2	MA0095.2.YY1	5.96822	0.811468	OCR369	15	26	+	tgagatggcagg
UN0682.1	UN0682.1.Zfp809	5.95926	0.816706	OCR369	341	351	-	tccacagcctt
MA0775.1	MA0775.1.MEIS3	5.93417	0.86046	OCR369	95	102	+	atgactgg
MA0738.1	MA0738.1.HIC2	5.93338	0.860718	OCR369	81	89	-	ctgccccat
MA1505.1	MA1505.1.HOXC8	5.92695	0.894927	OCR369	67	74	+	gcaatggg
MA0872.1	MA0872.1.TFAP2A	5.92149	0.801092	OCR369	180	192	+	tgcctgctaggcc
MA2003.1	MA2003.1.NKX2-4	5.92117	0.836611	OCR369	351	360	-	acacttgggt
MA0807.1	MA0807.1.TBX5	5.91722	0.820721	OCR369	231	238	-	aagtggta
MA1708.1	MA1708.1.ETV7	5.91393	0.827002	OCR369	152	162	+	gaagggaagag
MA0067.1	MA0067.1.Pax2	5.90832	0.876009	OCR369	93	100	-	agtcatac
MA1568.1	MA1568.1.TCF21	5.9058	0.822857	OCR369	107	118	-	gaccgcatggat
UN0308.1	UN0308.1.ESR2	5.90561	0.806676	OCR369	185	196	+	gctaggccaggg
MA0714.1	MA0714.1.PITX3	5.89433	0.837609	OCR369	54	62	-	cctaaccca
MA0508.3	MA0508.3.PRDM1	5.89097	0.808987	OCR369	31	41	+	tacttacactg
UN0682.1	UN0682.1.Zfp809	5.88497	0.815103	OCR369	211	221	-	ggccaagccac
UN0554.1	UN0554.1.GCM2::PITX1	5.88373	0.801885	OCR369	221	234	-	ggtagggagattag
MA0892.1	MA0892.1.GSX1	5.8747	0.853103	OCR369	29	38	+	cttacttaca
UN0225.1	UN0225.1.ZNF770	5.87181	0.809104	OCR369	165	176	-	acaggcctccct
MA0815.1	MA0815.1.TFAP2C	5.86985	0.817792	OCR369	180	192	+	tgcctgctaggcc
MA0872.1	MA0872.1.TFAP2A	5.86773	0.800266	OCR369	180	192	-	ggcctagcaggca
MA0467.2	MA0467.2.Crx	5.86186	0.841511	OCR369	220	229	-	ggagattagg
MA0714.1	MA0714.1.PITX3	5.86145	0.836832	OCR369	276	284	-	cctaagacc
MA1632.1	MA1632.1.ATF2	5.85928	0.811997	OCR369	97	109	+	gactggggtcatc
MA0850.1	MA0850.1.FOXP3	5.8551	0.862999	OCR369	176	182	-	gcaacca
MA0523.1	MA0523.1.TCF7L2	5.85139	0.823304	OCR369	333	346	+	taggagcaaaggct
MA0622.1	MA0622.1.Mlxip	5.85102	0.839202	OCR369	353	360	+	ccaagtgt
MA0442.1	MA0442.1.SOX10	5.84553	0.863962	OCR369	306	311	-	ctctgt
MA0442.1	MA0442.1.SOX10	5.84553	0.863962	OCR369	313	318	-	ctctgt
MA0033.2	MA0033.2.FOXL1	5.83687	0.882263	OCR369	122	128	+	gtacaca
MA1710.1	MA1710.1.ZNF257	5.8231	0.822552	OCR369	185	196	+	gctaggccaggg
UN0186.1	UN0186.1.ZNF396	5.81317	0.859393	OCR369	29	39	-	gtgtaagtaag
MA0835.2	MA0835.2.BATF3	5.80096	0.800868	OCR369	69	79	-	cctgacccatt
MA0124.2	MA0124.2.Nkx3-1	5.80021	0.829618	OCR369	285	293	+	gccactgaa
MA0604.1	MA0604.1.Atf1	5.79711	0.843668	OCR369	249	256	+	gtgaccta
MA2003.1	MA2003.1.NKX2-4	5.79701	0.833905	OCR369	233	242	+	ccacttgctt
MA1936.1	MA1936.1.ERF::FOXO1	5.79697	0.800392	OCR369	149	162	+	ggagaagggaagag
MA1511.2	MA1511.2.KLF10	5.79458	0.826457	OCR369	83	91	+	ggggcagga
UN0682.1	UN0682.1.Zfp809	5.79375	0.813135	OCR369	19	29	-	gaccctgccat
MA0620.1	MA0620.1.Mitf	5.78662	0.812309	OCR369	84	93	+	gggcaggagg
UN0609.1	UN0609.1.ZNF333	5.77662	0.847558	OCR369	104	112	-	atggatgac
UN0588.1	UN0588.1.ZFP64	5.77583	0.813892	OCR369	48	56	+	ggttcctgg
MA0047.2	MA0047.2.Foxa2	5.76841	0.813758	OCR369	306	317	-	tctgtactctgt
MA0099.3	MA0099.3.FOS::JUN	5.76465	0.809569	OCR369	70	79	+	atgggtcagg
MA0006.1	MA0006.1.Ahr::Arnt	5.75182	0.836607	OCR369	125	130	-	cgtgtg
MA0006.1	MA0006.1.Ahr::Arnt	5.75182	0.836607	OCR369	131	136	-	cgtgtg
MA0702.2	MA0702.2.LMX1A	5.74654	0.860653	OCR369	30	37	+	ttacttac
UN0227.1	UN0227.1.ZNF780A	5.74158	0.806646	OCR369	360	369	+	ttactgccag
MA0769.2	MA0769.2.TCF7	5.73967	0.810579	OCR369	335	345	-	gcctttgctcc
MA0002.2	MA0002.2.Runx1	5.73528	0.809924	OCR369	241	251	+	ttttctgggtg
MA0442.2	MA0442.2.SOX10	5.73352	0.816726	OCR369	310	320	+	agtacagagga
MA1515.1	MA1515.1.KLF2	5.72932	0.820249	OCR369	124	134	+	acacacgcaca
UN0323.1	UN0323.1.ZNF425	5.71475	0.801479	OCR369	192	202	-	ctcaggccctg
MA2003.1	MA2003.1.NKX2-4	5.70957	0.831999	OCR369	286	295	+	ccactgaaga
MA0825.1	MA0825.1.MNT	5.70791	0.825396	OCR369	232	241	-	agcaagtggt
MA0613.1	MA0613.1.FOXG1	5.6864	0.841638	OCR369	122	129	+	gtacacac
MA0047.3	MA0047.3.FOXA2	5.68634	0.809569	OCR369	117	127	-	gtgtacactga
MA1710.1	MA1710.1.ZNF257	5.66761	0.820106	OCR369	227	238	-	aagtggtaggga
UN0223.1	UN0223.1.ZNF766	5.65697	0.808613	OCR369	259	270	-	gggggaaaccaa
MA1568.1	MA1568.1.TCF21	5.6468	0.81872	OCR369	107	118	+	atccatgcggtc
MA0671.1	MA0671.1.NFIX	5.64259	0.878347	OCR369	18	26	+	gatggcagg
MA0849.1	MA0849.1.FOXO6	5.64198	0.869631	OCR369	346	352	-	gtccaca
MA0099.2	MA0099.2.FOS::JUN	5.63074	0.816279	OCR369	96	102	+	tgactgg
UN0659.1	UN0659.1.ZNF786	5.61325	0.816086	OCR369	188	198	-	ggccctggcct
MA0769.2	MA0769.2.TCF7	5.61193	0.807867	OCR369	10	20	+	tcctatgagat
MA0848.1	MA0848.1.FOXO4	5.60831	0.85953	OCR369	346	352	-	gtccaca
MA0692.1	MA0692.1.TFEB	5.60757	0.82874	OCR369	170	179	-	accacaggcc
MA0877.1	MA0877.1.Barhl1	5.60204	0.853123	OCR369	220	229	+	cctaatctcc
MA1515.1	MA1515.1.KLF2	5.59904	0.817689	OCR369	322	332	-	cccaacacctt
MA0158.1	MA0158.1.HOXA5	5.59899	0.850068	OCR369	65	72	+	cagcaatg
MA0807.1	MA0807.1.TBX5	5.59869	0.81249	OCR369	204	211	-	cggtggga
MA0027.1	MA0027.1.En1	5.59124	0.848055	OCR369	173	183	+	ctgtggttgcc
MA0685.2	MA0685.2.SP4	5.58691	0.828267	OCR369	267	275	-	agagagggg
MA1110.2	MA1110.2.Nr1H4	5.57256	0.853224	OCR369	100	109	+	tggggtcatc
MA1567.1	MA1567.1.TBX6	5.5723	0.822881	OCR369	123	132	-	tgcgtgtgta
MA0862.1	MA0862.1.GMEB2	5.56286	0.813026	OCR369	30	37	+	ttacttac
MA0047.3	MA0047.3.FOXA2	5.56249	0.807098	OCR369	29	39	-	gtgtaagtaag
MA0442.1	MA0442.1.SOX10	5.56096	0.851329	OCR369	37	42	+	cactgt
MA0893.2	MA0893.2.GSX2	5.55822	0.884244	OCR369	67	74	-	cccattgc
MA0033.2	MA0033.2.FOXL1	5.55817	0.877159	OCR369	257	263	-	accaaca
MA0605.1	MA0605.1.Atf3	5.55707	0.824851	OCR369	102	109	-	gatgaccc
UN0609.1	UN0609.1.ZNF333	5.54336	0.843565	OCR369	81	89	+	atggggcag
MA0493.2	MA0493.2.KLF1	5.53931	0.836468	OCR369	342	350	+	aggctgtgg
MA0622.1	MA0622.1.Mlxip	5.53901	0.832649	OCR369	233	240	-	gcaagtgg
MA0674.1	MA0674.1.NKX6-1	5.538	0.857212	OCR369	30	37	+	ttacttac
MA0850.1	MA0850.1.FOXP3	5.53539	0.854955	OCR369	122	128	+	gtacaca
MA0741.1	MA0741.1.KLF16	5.5277	0.801305	OCR369	167	177	-	cacaggcctcc
MA0913.1	MA0913.1.Hoxd9	5.52362	0.812937	OCR369	357	366	-	gcagtaacac
MA1530.1	MA1530.1.NKX6-3	5.52337	0.863488	OCR369	66	74	-	cccattgct
MA0817.1	MA0817.1.BHLHE23	5.51893	0.831111	OCR369	250	261	+	tgacctatgttg
MA0623.1	MA0623.1.Neurog1	5.50152	0.830456	OCR369	108	117	-	accgcatgga
MA0668.1	MA0668.1.NEUROD2	5.49843	0.85462	OCR369	251	260	-	aacataggtc
MA0646.1	MA0646.1.GCM1	5.49009	0.817709	OCR369	110	120	+	catgcggtcag
MA0739.1	MA0739.1.Hic1	5.47821	0.827898	OCR369	202	210	+	gttcccacc
MA0880.1	MA0880.1.Dlx3	5.47054	0.845687	OCR369	30	37	+	ttacttac
MA1524.1	MA1524.1.MSGN1	5.46513	0.839158	OCR369	351	362	-	taacacttgggt
MA0523.1	MA0523.1.TCF7L2	5.45416	0.817814	OCR369	308	321	+	agagtacagaggag
UN0227.1	UN0227.1.ZNF780A	5.45175	0.801484	OCR369	164	173	-	ggcctcccta
MA0882.1	MA0882.1.DLX6	5.45061	0.854499	OCR369	30	37	+	ttacttac
MA1566.2	MA1566.2.TBX3	5.44801	0.801842	OCR369	354	364	+	caagtgttact
MA0904.2	MA0904.2.HOXB5	5.44239	0.870049	OCR369	67	74	+	gcaatggg
MA0826.1	MA0826.1.OLIG1	5.4302	0.849917	OCR369	251	260	+	gacctatgtt
MA0145.2	MA0145.2.Tfcp2l1	5.42843	0.810195	OCR369	182	195	-	cctggcctagcagg
MA0122.2	MA0122.2.NKX3-2	5.42177	0.821591	OCR369	285	293	+	gccactgaa
MA0136.2	MA0136.2.ELF5	5.41477	0.814796	OCR369	261	271	-	agggggaaacc
MA0514.2	MA0514.2.Sox3	5.41181	0.812218	OCR369	65	75	+	cagcaatgggt
MA0499.1	MA0499.1.Myod1	5.41053	0.859766	OCR369	82	94	-	acctcctgcccca
MA1554.1	MA1554.1.RFX7	5.40937	0.834817	OCR369	257	265	+	tgttggttt
MA0738.1	MA0738.1.HIC2	5.40826	0.849028	OCR369	17	25	-	ctgccatct
MA1099.1	MA1099.1.Hes1	5.39647	0.808513	OCR369	125	134	+	cacacgcaca
MA0699.1	MA0699.1.LBX2	5.39308	0.82097	OCR369	29	38	+	cttacttaca
MA0039.2	MA0039.2.Klf4	5.38702	0.828034	OCR369	342	351	+	aggctgtgga
MA0075.2	MA0075.2.Prrx2	5.37403	0.831216	OCR369	30	37	+	ttacttac
UN0673.1	UN0673.1.Fosb	5.36468	0.808544	OCR369	69	79	-	cctgacccatt
MA1554.1	MA1554.1.RFX7	5.3628	0.833784	OCR369	41	49	-	ccttaccac
MA0682.1	MA0682.1.Pitx1	5.36125	0.828157	OCR369	54	61	-	ctaaccca
MA0881.1	MA0881.1.Dlx4	5.35589	0.850984	OCR369	30	37	+	ttacttac
UN0609.1	UN0609.1.ZNF333	5.34038	0.84009	OCR369	154	162	+	agggaagag
MA1468.1	MA1468.1.ATOH7	5.33717	0.829309	OCR369	251	260	+	gacctatgtt
MA1108.2	MA1108.2.MXI1	5.33668	0.863755	OCR369	108	117	-	accgcatgga
MA0130.1	MA0130.1.ZNF354C	5.33082	0.843091	OCR369	140	145	-	agccac
MA0130.1	MA0130.1.ZNF354C	5.33082	0.843091	OCR369	211	216	-	agccac
MA0723.2	MA0723.2.VAX2	5.30896	0.887471	OCR369	11	18	+	cctatgag
MA0904.2	MA0904.2.HOXB5	5.30709	0.867345	OCR369	67	74	-	cccattgc
MA0891.1	MA0891.1.GSC2	5.3013	0.819051	OCR369	275	284	-	cctaagacca
MA0721.1	MA0721.1.UNCX	5.29996	0.833947	OCR369	30	37	+	ttacttac
MA0006.1	MA0006.1.Ahr::Arnt	5.29689	0.817305	OCR369	133	138	-	tccgtg
MA0006.1	MA0006.1.Ahr::Arnt	5.29689	0.817305	OCR369	180	185	+	tgcctg
MA0006.1	MA0006.1.Ahr::Arnt	5.29689	0.817305	OCR369	246	251	+	tgggtg
MA1512.1	MA1512.1.KLF11	5.29028	0.821434	OCR369	321	331	-	ccaacaccttc
MA1708.1	MA1708.1.ETV7	5.28683	0.81605	OCR369	261	271	-	agggggaaacc
MA1574.1	MA1574.1.THRB	5.28518	0.816474	OCR369	47	61	+	aggttcctgggttag
MA0682.1	MA0682.1.Pitx1	5.28439	0.826241	OCR369	104	111	+	gtcatcca
MA0442.1	MA0442.1.SOX10	5.28076	0.838889	OCR369	132	137	-	ccgtgt
MA0488.1	MA0488.1.JUN	5.28038	0.845229	OCR369	99	111	-	tggatgaccccag
MA1559.1	MA1559.1.SNAI3	5.27424	0.82768	OCR369	232	241	-	agcaagtggt
MA0819.2	MA0819.2.CLOCK	5.2633	0.828075	OCR369	122	131	+	gtacacacgc
MA0850.1	MA0850.1.FOXP3	5.25884	0.847997	OCR369	238	244	-	aaaagca
MA0498.2	MA0498.2.MEIS1	5.24956	0.891915	OCR369	363	369	+	ctgccag
MA1099.2	MA1099.2.HES1	5.23459	0.853516	OCR369	123	132	-	tgcgtgtgta
MA0801.1	MA0801.1.MGA	5.21482	0.837028	OCR369	91	98	+	aggtatga
MA1548.1	MA1548.1.PLAGL2	5.20954	0.805384	OCR369	165	174	-	aggcctccct
MA1536.1	MA1536.1.NR2C2	5.20802	0.908317	OCR369	246	253	+	tgggtgac
MA1567.1	MA1567.1.TBX6	5.19923	0.81486	OCR369	203	212	-	acggtgggaa
MA1710.1	MA1710.1.ZNF257	5.19285	0.812637	OCR369	307	318	+	cagagtacagag
MA2003.1	MA2003.1.NKX2-4	5.1764	0.820377	OCR369	146	155	-	cttctccaag
UN0143.1	UN0143.1.ZBTB20	5.17491	0.841301	OCR369	117	128	+	tcagtgtacaca
MA0682.1	MA0682.1.Pitx1	5.17422	0.823495	OCR369	276	283	-	ctaagacc
UN0330.1	UN0330.1.ZNF513	5.17021	0.822309	OCR369	153	162	+	aagggaagag
MA1534.1	MA1534.1.NR1I3	5.16904	0.854411	OCR369	308	316	-	ctgtactct
MA0493.2	MA0493.2.KLF1	5.16804	0.829811	OCR369	267	275	-	agagagggg
MA1505.1	MA1505.1.HOXC8	5.16262	0.87973	OCR369	30	37	-	gtaagtaa
MA1468.1	MA1468.1.ATOH7	5.1606	0.826062	OCR369	85	94	-	acctcctgcc
MA1517.1	MA1517.1.KLF6	5.15622	0.814338	OCR369	322	332	-	cccaacacctt
MA0467.2	MA0467.2.Crx	5.14716	0.825469	OCR369	53	62	+	ctgggttagg
MA1563.2	MA1563.2.SOX18	5.13218	0.857364	OCR369	66	73	+	agcaatgg
MA1497.1	MA1497.1.HOXA6	5.12657	0.826605	OCR369	56	65	-	ggtcctaacc
UN0139.1	UN0139.1.YBX1	5.11931	0.856497	OCR369	89	97	-	catacctcc
MA0903.1	MA0903.1.HOXB3	5.11448	0.852917	OCR369	220	229	-	ggagattagg
MA0036.3	MA0036.3.GATA2	5.11195	0.808208	OCR369	238	248	+	tgcttttctgg
MA0671.1	MA0671.1.NFIX	5.10824	0.865767	OCR369	178	186	-	gcaggcaac
MA0605.1	MA0605.1.Atf3	5.10319	0.815449	OCR369	248	255	+	ggtgacct
MA0035.3	MA0035.3.Gata1	5.10295	0.837746	OCR369	2	12	+	gtcatatctcc
MA0594.2	MA0594.2.HOXA9	5.10237	0.842007	OCR369	90	99	-	gtcatacctc
MA0846.1	MA0846.1.FOXC2	5.10034	0.812809	OCR369	29	40	-	agtgtaagtaag
MA1548.1	MA1548.1.PLAGL2	5.09973	0.803237	OCR369	282	291	+	agggccactg
MA0645.1	MA0645.1.ETV6	5.09954	0.815313	OCR369	133	142	+	cacggatgtg
UN0659.1	UN0659.1.ZNF786	5.09826	0.806101	OCR369	95	105	-	accccagtcat
MA0145.2	MA0145.2.Tfcp2l1	5.09369	0.805324	OCR369	182	195	+	cctgctaggccagg
UN0610.1	UN0610.1.ZNF337	5.08696	0.833171	OCR369	240	251	+	cttttctgggtg
MA1542.1	MA1542.1.OSR1	5.08544	0.827321	OCR369	204	213	+	tcccaccgtg
MA1512.1	MA1512.1.KLF11	5.08206	0.818402	OCR369	123	133	+	tacacacgcac
MA1578.1	MA1578.1.VEZF1	5.07686	0.811707	OCR369	267	276	+	cccctctctg
MA0063.1	MA0063.1.Nkx2-5	5.0752	0.829214	OCR369	234	240	-	gcaagtg
MA1483.2	MA1483.2.ELF2	5.07326	0.828493	OCR369	47	58	-	acccaggaacct
MA1468.1	MA1468.1.ATOH7	5.07189	0.824431	OCR369	232	241	-	agcaagtggt
MA0914.1	MA0914.1.ISL2	5.0684	0.819354	OCR369	30	37	+	ttacttac
MA0635.1	MA0635.1.BARHL2	5.06164	0.860817	OCR369	220	229	+	cctaatctcc
MA0259.1	MA0259.1.ARNT::HIF1A	5.0571	0.816771	OCR369	136	143	+	ggatgtgg
MA0820.1	MA0820.1.FIGLA	5.05003	0.816768	OCR369	232	241	+	accacttgct
MA1100.2	MA1100.2.ASCL1	5.04978	0.82269	OCR369	85	94	-	acctcctgcc
MA1504.1	MA1504.1.HOXC4	5.02581	0.881825	OCR369	67	74	-	cccattgc
MA0027.1	MA0027.1.En1	5.02372	0.825295	OCR369	294	304	+	gagtgatatac
MA0623.1	MA0623.1.Neurog1	5.02046	0.819286	OCR369	251	260	-	aacataggtc
MA0475.2	MA0475.2.FLI1	5.01699	0.842527	OCR369	133	142	+	cacggatgtg
MA0136.2	MA0136.2.ELF5	5.01458	0.807336	OCR369	47	57	-	cccaggaacct
UN0124.1	UN0124.1.HOXB1	5.00593	0.864417	OCR369	67	74	-	cccattgc
UN0175.1	UN0175.1.ZNF296	4.99601	0.805323	OCR369	345	355	+	ctgtggaccca
MA0820.1	MA0820.1.FIGLA	4.99261	0.815624	OCR369	352	361	-	aacacttggg
MA1110.2	MA1110.2.Nr1H4	4.98798	0.841288	OCR369	70	79	+	atgggtcagg
MA1965.1	MA1965.1.SP5	4.9861	0.842147	OCR369	83	92	-	ctcctgcccc
MA1578.1	MA1578.1.VEZF1	4.98503	0.809816	OCR369	265	274	+	tccccctctc
MA0067.1	MA0067.1.Pax2	4.97804	0.839478	OCR369	358	365	+	tgttactg
UN0587.1	UN0587.1.ZBTB21	4.97257	0.827305	OCR369	87	96	-	atacctcctg
MA1535.1	MA1535.1.NR2C1	4.97205	0.867163	OCR369	245	253	+	ctgggtgac
MA2003.1	MA2003.1.NKX2-4	4.96846	0.815845	OCR369	154	163	-	cctcttccct
MA1964.1	MA1964.1.SMAD2	4.95833	0.82906	OCR369	95	104	-	ccccagtcat
MA0442.1	MA0442.1.SOX10	4.95582	0.824463	OCR369	254	259	+	ctatgt
MA0672.1	MA0672.1.NKX2-3	4.92919	0.84077	OCR369	142	151	+	ggctcttgga
UN0558.1	UN0558.1.HOXA3	4.92423	0.844403	OCR369	66	75	-	acccattgct
UN0587.1	UN0587.1.ZBTB21	4.92024	0.8263	OCR369	98	107	-	tgaccccagt
MA0027.1	MA0027.1.En1	4.91956	0.821117	OCR369	228	238	-	aagtggtaggg
MA0625.2	MA0625.2.NFATC3	4.91791	0.843393	OCR369	47	55	-	caggaacct
MA0130.1	MA0130.1.ZNF354C	4.91578	0.824925	OCR369	107	112	+	atccat
MA1495.1	MA1495.1.HOXA1	4.91442	0.876093	OCR369	67	74	+	gcaatggg
MA1515.1	MA1515.1.KLF2	4.91067	0.804164	OCR369	342	352	-	gtccacagcct
MA1570.1	MA1570.1.TFAP4	4.90042	0.831184	OCR369	2	11	+	gtcatatctc
MA1484.1	MA1484.1.ETS2	4.8985	0.85514	OCR369	132	141	+	acacggatgt
UN0610.1	UN0610.1.ZNF337	4.89825	0.829833	OCR369	7	18	+	atctcctatgag
MA0100.3	MA0100.3.MYB	4.89519	0.832239	OCR369	352	361	+	cccaagtgtt
MA0006.1	MA0006.1.Ahr::Arnt	4.89067	0.800069	OCR369	110	115	-	cgcatg
MA0067.1	MA0067.1.Pax2	4.8894	0.835997	OCR369	73	80	+	ggtcaggt
MA1710.1	MA1710.1.ZNF257	4.88333	0.807768	OCR369	334	345	+	aggagcaaaggc
MA1965.1	MA1965.1.SP5	4.87749	0.840373	OCR369	227	236	+	tccctaccac
MA1495.1	MA1495.1.HOXA1	4.87454	0.875331	OCR369	67	74	-	cccattgc
MA0717.1	MA0717.1.RAX2	4.87432	0.823551	OCR369	30	37	+	ttacttac
MA1965.1	MA1965.1.SP5	4.86967	0.840245	OCR369	160	169	-	tccctacctc
MA0104.3	MA0104.3.Mycn	4.86528	0.82471	OCR369	352	359	+	cccaagtg
MA0820.1	MA0820.1.FIGLA	4.86516	0.813086	OCR369	85	94	-	acctcctgcc
MA1518.1	MA1518.1.LHX1	4.85738	0.841778	OCR369	221	228	+	ctaatctc
MA1116.1	MA1116.1.RBPJ	4.85362	0.824966	OCR369	327	336	+	gttgggtagg
MA0625.2	MA0625.2.NFATC3	4.85254	0.84187	OCR369	262	270	-	gggggaaac
MA0259.1	MA0259.1.ARNT::HIF1A	4.84683	0.810498	OCR369	233	240	+	ccacttgc
MA1100.2	MA1100.2.ASCL1	4.84503	0.818542	OCR369	85	94	+	ggcaggaggt
MA1497.1	MA1497.1.HOXA6	4.84453	0.819642	OCR369	358	367	-	ggcagtaaca
MA1554.1	MA1554.1.RFX7	4.84232	0.822234	OCR369	261	269	+	ggtttcccc
MA0147.2	MA0147.2.Myc	4.82899	0.845696	OCR369	128	137	-	ccgtgtgcgt
MA0442.1	MA0442.1.SOX10	4.82019	0.818442	OCR369	151	156	-	ccttct
MA0442.1	MA0442.1.SOX10	4.82019	0.818442	OCR369	320	325	-	ccttct
MA0673.1	MA0673.1.NKX2-8	4.8163	0.857631	OCR369	143	151	+	gctcttgga
UN0139.1	UN0139.1.YBX1	4.81548	0.851412	OCR369	202	210	+	gttcccacc
MA0594.2	MA0594.2.HOXA9	4.8096	0.834998	OCR369	55	64	-	gtcctaaccc
MA1536.1	MA1536.1.NR2C2	4.7944	0.900763	OCR369	82	89	+	tggggcag
MA0725.1	MA0725.1.VSX1	4.79128	0.803652	OCR369	30	37	+	ttacttac
UN0124.1	UN0124.1.HOXB1	4.79057	0.86028	OCR369	30	37	-	gtaagtaa
UN0607.1	UN0607.1.ZNF273	4.78711	0.81231	OCR369	79	90	-	cctgccccatac
MA1500.1	MA1500.1.HOXB6	4.78287	0.864616	OCR369	30	37	-	gtaagtaa
MA1472.1	MA1472.1.BHLHA15	4.7753	0.816659	OCR369	133	142	+	cacggatgtg
UN0124.1	UN0124.1.HOXB1	4.77003	0.859886	OCR369	67	74	+	gcaatggg
MA0098.3	MA0098.3.ETS1	4.7699	0.813005	OCR369	86	95	+	gcaggaggta
MA0738.1	MA0738.1.HIC2	4.76391	0.834682	OCR369	327	335	-	ctacccaac
MA0103.3	MA0103.3.ZEB1	4.7592	0.824935	OCR369	319	329	-	aacaccttctc
MA0879.1	MA0879.1.Dlx1	4.74095	0.823927	OCR369	220	229	+	cctaatctcc
MA1108.2	MA1108.2.MXI1	4.73987	0.852603	OCR369	135	144	-	gccacatccg
MA1563.2	MA1563.2.SOX18	4.7333	0.848639	OCR369	292	299	+	aagagtga
MA0774.1	MA0774.1.MEIS2	4.73273	0.803879	OCR369	113	120	-	ctgaccgc
MA0614.1	MA0614.1.Foxj2	4.73196	0.822321	OCR369	256	263	-	accaacat
MA0063.1	MA0063.1.Nkx2-5	4.73061	0.81534	OCR369	287	293	-	ttcagtg
MA0524.2	MA0524.2.TFAP2C	4.72805	0.811008	OCR369	188	199	+	aggccagggcct
MA0130.1	MA0130.1.ZNF354C	4.72314	0.816493	OCR369	147	152	-	ctccaa
MA0699.1	MA0699.1.LBX2	4.7145	0.802322	OCR369	285	294	+	gccactgaag
MA0806.1	MA0806.1.TBX4	4.71197	0.819727	OCR369	91	98	+	aggtatga
MA1567.1	MA1567.1.TBX6	4.70246	0.804179	OCR369	90	99	+	gaggtatgac
MA1583.1	MA1583.1.ZFP57	4.70114	0.803239	OCR369	80	92	-	ctcctgccccata
MA0671.1	MA0671.1.NFIX	4.70059	0.85617	OCR369	146	154	-	ttctccaag
MA0157.2	MA0157.2.FOXO3	4.69821	0.801776	OCR369	260	267	-	ggaaacca
MA0100.3	MA0100.3.MYB	4.69546	0.827986	OCR369	284	293	+	ggccactgaa
MA0895.1	MA0895.1.HMBOX1	4.69496	0.806446	OCR369	53	62	+	ctgggttagg
MA1965.1	MA1965.1.SP5	4.68353	0.837205	OCR369	329	338	-	ctcctaccca
MA0035.3	MA0035.3.Gata1	4.68247	0.831985	OCR369	219	229	+	gcctaatctcc
UN0587.1	UN0587.1.ZBTB21	4.67768	0.821638	OCR369	38	47	-	ttaccacagt
MA0796.1	MA0796.1.TGIF1	4.67516	0.815562	OCR369	96	107	+	tgactggggtca
MA1518.1	MA1518.1.LHX1	4.67501	0.836333	OCR369	221	228	-	gagattag
MA0067.1	MA0067.1.Pax2	4.67473	0.827568	OCR369	1	8	+	ggtcatat
MA0442.1	MA0442.1.SOX10	4.6688	0.811721	OCR369	338	343	-	ctttgc
MA0825.1	MA0825.1.MNT	4.66488	0.802616	OCR369	352	361	+	cccaagtgtt
MA0607.1	MA0607.1.Bhlha15	4.66161	0.832934	OCR369	252	259	+	acctatgt
MA0607.1	MA0607.1.Bhlha15	4.66161	0.832934	OCR369	252	259	-	acataggt
MA0482.1	MA0482.1.Gata4	4.66153	0.83881	OCR369	39	49	-	ccttaccacag
MA1500.1	MA1500.1.HOXB6	4.65518	0.861941	OCR369	67	74	+	gcaatggg
UN0139.1	UN0139.1.YBX1	4.65217	0.848679	OCR369	92	100	-	agtcatacc
MA0888.1	MA0888.1.EVX2	4.63632	0.834614	OCR369	29	38	-	tgtaagtaag
MA0113.2	MA0113.2.NR3C1	4.63611	0.80626	OCR369	301	315	+	ataccacagagtaca
MA0130.1	MA0130.1.ZNF354C	4.63567	0.812665	OCR369	316	321	-	ctcctc
MA0724.1	MA0724.1.VENTX	4.63147	0.843016	OCR369	221	229	-	ggagattag
MA0850.1	MA0850.1.FOXP3	4.63109	0.832203	OCR369	260	266	-	gaaacca
MA0848.1	MA0848.1.FOXO4	4.62511	0.840092	OCR369	31	37	-	gtaagta
MA0662.1	MA0662.1.MIXL1	4.61094	0.82522	OCR369	29	38	+	cttacttaca
MA0104.3	MA0104.3.Mycn	4.61084	0.819822	OCR369	234	241	-	agcaagtg
MA0632.1	MA0632.1.Tcfl5	4.5999	0.830439	OCR369	129	138	+	cgcacacgga
MA0632.1	MA0632.1.Tcfl5	4.5999	0.830439	OCR369	129	138	-	tccgtgtgcg
MA2003.1	MA2003.1.NKX2-4	4.59547	0.807715	OCR369	143	152	+	gctcttggag
MA0058.3	MA0058.3.MAX	4.57712	0.820663	OCR369	232	241	-	agcaagtggt
MA0674.1	MA0674.1.NKX6-1	4.57578	0.836307	OCR369	30	37	-	gtaagtaa
MA1517.1	MA1517.1.KLF6	4.5749	0.803887	OCR369	122	132	+	gtacacacgca
MA0063.1	MA0063.1.Nkx2-5	4.56597	0.808712	OCR369	31	37	-	gtaagta
MA0646.1	MA0646.1.GCM1	4.5647	0.804023	OCR369	61	71	-	attgctggtcc
UN0605.1	UN0605.1.ZNF264	4.55865	0.828839	OCR369	84	92	+	gggcaggag
UN0605.1	UN0605.1.ZNF264	4.55865	0.828839	OCR369	330	338	+	gggtaggag
MA0461.2	MA0461.2.Atoh1	4.55545	0.807744	OCR369	2	11	-	gagatatgac
MA0706.1	MA0706.1.MEOX2	4.54737	0.804983	OCR369	29	38	-	tgtaagtaag
UN0143.1	UN0143.1.ZBTB20	4.53752	0.831112	OCR369	31	42	-	acagtgtaagta
UN0587.1	UN0587.1.ZBTB21	4.52309	0.818668	OCR369	157	166	-	ctacctcttc
MA0738.1	MA0738.1.HIC2	4.52167	0.829289	OCR369	122	130	+	gtacacacg
MA0259.1	MA0259.1.ARNT::HIF1A	4.51712	0.800662	OCR369	132	139	-	atccgtgt
MA0607.2	MA0607.2.BHLHA15	4.51075	0.824719	OCR369	251	260	+	gacctatgtt
MA1467.1	MA1467.1.ATOH1	4.50847	0.812924	OCR369	251	260	-	aacataggtc
MA0643.1	MA0643.1.Esrrg	4.50699	0.822477	OCR369	249	258	-	cataggtcac
MA0819.2	MA0819.2.CLOCK	4.50236	0.813578	OCR369	233	242	-	aagcaagtgg
MA0723.2	MA0723.2.VAX2	4.50022	0.869369	OCR369	30	37	+	ttacttac
MA1559.1	MA1559.1.SNAI3	4.49763	0.815665	OCR369	320	329	+	agaaggtgtt
MA0058.3	MA0058.3.MAX	4.4966	0.819193	OCR369	352	361	-	aacacttggg
MA1468.1	MA1468.1.ATOH7	4.49589	0.813838	OCR369	108	117	-	accgcatgga
MA1100.2	MA1100.2.ASCL1	4.48752	0.8113	OCR369	232	241	-	agcaagtggt
UN0556.1	UN0556.1.GLI4	4.48582	0.808826	OCR369	159	170	+	agaggtagggag
MA0032.2	MA0032.2.FOXC1	4.48105	0.820756	OCR369	256	266	-	gaaaccaacat
MA1965.1	MA1965.1.SP5	4.48064	0.83389	OCR369	267	276	+	cccctctctg
UN0609.1	UN0609.1.ZNF333	4.47066	0.825201	OCR369	316	324	+	gaggagaag
MA0819.2	MA0819.2.CLOCK	4.45977	0.812767	OCR369	231	240	+	taccacttgc
MA0672.1	MA0672.1.NKX2-3	4.45408	0.832615	OCR369	285	294	+	gccactgaag
MA1498.2	MA1498.2.HOXA7	4.45293	0.833136	OCR369	221	228	-	gagattag
UN0605.1	UN0605.1.ZNF264	4.45268	0.826686	OCR369	267	275	-	agagagggg
MA0594.2	MA0594.2.HOXA9	4.45237	0.826446	OCR369	357	366	-	gcagtaacac
MA0067.1	MA0067.1.Pax2	4.44932	0.818716	OCR369	115	122	+	ggtcagtg
MA0626.1	MA0626.1.Npas2	4.44883	0.807667	OCR369	232	241	+	accacttgct
MA1496.1	MA1496.1.HOXA4	4.44877	0.863222	OCR369	67	74	-	cccattgc
MA1542.1	MA1542.1.OSR1	4.44671	0.816576	OCR369	284	293	+	ggccactgaa
MA1496.1	MA1496.1.HOXA4	4.4457	0.86316	OCR369	30	37	-	gtaagtaa
MA1525.2	MA1525.2.NFATC4	4.4335	0.821397	OCR369	261	270	-	gggggaaacc
MA0671.1	MA0671.1.NFIX	4.42819	0.849757	OCR369	139	147	-	agagccaca
MA0614.1	MA0614.1.Foxj2	4.42629	0.816172	OCR369	122	129	+	gtacacac
MA0685.2	MA0685.2.SP4	4.41793	0.808807	OCR369	154	162	+	agggaagag
UN0587.1	UN0587.1.ZBTB21	4.41173	0.816528	OCR369	43	52	-	gaaccttacc
MA0805.1	MA0805.1.TBX1	4.41044	0.81322	OCR369	292	299	+	aagagtga
UN0139.1	UN0139.1.YBX1	4.39829	0.844431	OCR369	18	26	-	cctgccatc
MA0673.1	MA0673.1.NKX2-8	4.39663	0.850042	OCR369	147	155	-	cttctccaa
MA0100.2	MA0100.2.Myb	4.39238	0.820128	OCR369	141	150	-	ccaagagcca
MA0645.1	MA0645.1.ETV6	4.39021	0.803165	OCR369	86	95	+	gcaggaggta
UN0610.1	UN0610.1.ZNF337	4.38662	0.820784	OCR369	183	194	-	ctggcctagcag
MA0716.1	MA0716.1.PRRX1	4.38148	0.813658	OCR369	30	37	+	ttacttac
MA0067.1	MA0067.1.Pax2	4.37857	0.815938	OCR369	284	291	+	ggccactg
UN0139.1	UN0139.1.YBX1	4.37796	0.84409	OCR369	1	9	+	ggtcatatc
MA0662.1	MA0662.1.MIXL1	4.37194	0.818999	OCR369	220	229	-	ggagattagg
MA1518.1	MA1518.1.LHX1	4.36837	0.827176	OCR369	11	18	+	cctatgag
MA0067.1	MA0067.1.Pax2	4.3593	0.815181	OCR369	247	254	-	ggtcaccc
MA1570.1	MA1570.1.TFAP4	4.35387	0.820755	OCR369	352	361	+	cccaagtgtt
MA0722.1	MA0722.1.VAX1	4.35037	0.803603	OCR369	67	74	-	cccattgc
MA1558.1	MA1558.1.SNAI1	4.34872	0.824536	OCR369	85	94	+	ggcaggaggt
MA1500.1	MA1500.1.HOXB6	4.32554	0.855034	OCR369	67	74	-	cccattgc
MA1519.1	MA1519.1.LHX5	4.31975	0.844773	OCR369	30	37	-	gtaagtaa
MA1498.2	MA1498.2.HOXA7	4.31936	0.829517	OCR369	67	74	-	cccattgc
MA0033.2	MA0033.2.FOXL1	4.31907	0.854468	OCR369	31	37	-	gtaagta
MA0158.1	MA0158.1.HOXA5	4.31841	0.804967	OCR369	240	247	-	cagaaaag
UN0605.1	UN0605.1.ZNF264	4.31702	0.82393	OCR369	194	202	+	gggcctgag
MA0632.1	MA0632.1.Tcfl5	4.29823	0.820885	OCR369	108	117	+	tccatgcggt
MA0632.1	MA0632.1.Tcfl5	4.29823	0.820885	OCR369	108	117	-	accgcatgga
MA0625.2	MA0625.2.NFATC3	4.2922	0.828816	OCR369	153	161	+	aagggaaga
MA1472.1	MA1472.1.BHLHA15	4.29175	0.806787	OCR369	251	260	+	gacctatgtt
MA1563.2	MA1563.2.SOX18	4.28773	0.838894	OCR369	117	124	-	tacactga
MA0623.1	MA0623.1.Neurog1	4.28373	0.80218	OCR369	129	138	-	tccgtgtgcg
MA0672.1	MA0672.1.NKX2-3	4.28345	0.829686	OCR369	289	298	-	cactcttcag
MA0158.1	MA0158.1.HOXA5	4.27839	0.803558	OCR369	76	83	+	caggtatg
MA1518.1	MA1518.1.LHX1	4.27746	0.824462	OCR369	16	23	-	gccatctc
MA0625.2	MA0625.2.NFATC3	4.27627	0.828445	OCR369	147	155	+	ttggagaag
MA0877.1	MA0877.1.Barhl1	4.27161	0.818062	OCR369	29	38	-	tgtaagtaag
MA0739.1	MA0739.1.Hic1	4.26943	0.802858	OCR369	214	222	-	aggccaagc
MA0879.2	MA0879.2.DLX1	4.26784	0.852806	OCR369	30	37	+	ttacttac
MA0498.2	MA0498.2.MEIS1	4.26479	0.871061	OCR369	19	25	-	ctgccat
MA0879.2	MA0879.2.DLX1	4.25778	0.852585	OCR369	221	228	-	gagattag
MA0671.1	MA0671.1.NFIX	4.25294	0.845631	OCR369	210	218	-	caagccacg
MA1497.1	MA1497.1.HOXA6	4.25011	0.804966	OCR369	1	10	+	ggtcatatct
MA1472.1	MA1472.1.BHLHA15	4.24635	0.80586	OCR369	320	329	+	agaaggtgtt
MA1570.1	MA1570.1.TFAP4	4.23847	0.818553	OCR369	108	117	-	accgcatgga
UN0580.1	UN0580.1.TCF15	4.22944	0.848443	OCR369	251	260	-	aacataggtc
UN0558.1	UN0558.1.HOXA3	4.22461	0.83105	OCR369	66	75	+	agcaatgggt
UN0587.1	UN0587.1.ZBTB21	4.22393	0.812919	OCR369	13	22	-	ccatctcata
MA0668.1	MA0668.1.NEUROD2	4.22326	0.833782	OCR369	108	117	+	tccatgcggt
UN0143.1	UN0143.1.ZBTB20	4.22072	0.826048	OCR369	298	309	-	ctgtggtatatc
MA0811.1	MA0811.1.TFAP2B	4.20997	0.80712	OCR369	188	199	-	aggccctggcct
MA0027.2	MA0027.2.EN1	4.20881	0.833035	OCR369	221	228	+	ctaatctc
MA0058.3	MA0058.3.MAX	4.20474	0.813865	OCR369	352	361	+	cccaagtgtt
MA0147.2	MA0147.2.Myc	4.19282	0.836359	OCR369	171	180	+	gcctgtggtt
MA0524.2	MA0524.2.TFAP2C	4.19248	0.802305	OCR369	188	199	-	aggccctggcct
MA0607.2	MA0607.2.BHLHA15	4.18948	0.820269	OCR369	251	260	-	aacataggtc
MA0739.1	MA0739.1.Hic1	4.18583	0.801126	OCR369	301	309	+	ataccacag
MA1513.1	MA1513.1.KLF15	4.17393	0.802292	OCR369	82	92	-	ctcctgcccca
MA0662.1	MA0662.1.MIXL1	4.16531	0.813622	OCR369	220	229	+	cctaatctcc
UN0139.1	UN0139.1.YBX1	4.16217	0.840479	OCR369	152	160	-	cttcccttc
UN0605.1	UN0605.1.ZNF264	4.16107	0.820761	OCR369	19	27	+	atggcaggg
MA1638.1	MA1638.1.HAND2	4.1599	0.839286	OCR369	14	23	+	atgagatggc
MA0806.1	MA0806.1.TBX4	4.14942	0.808384	OCR369	231	238	-	aagtggta
MA0819.2	MA0819.2.CLOCK	4.1459	0.806787	OCR369	107	116	+	atccatgcgg
MA1535.1	MA1535.1.NR2C1	4.14463	0.851229	OCR369	81	89	+	atggggcag
MA0037.3	MA0037.3.GATA3	4.14174	0.816438	OCR369	297	304	+	tgatatac
UN0605.1	UN0605.1.ZNF264	4.14161	0.820366	OCR369	316	324	+	gaggagaag
MA1116.1	MA1116.1.RBPJ	4.13855	0.810019	OCR369	262	271	-	agggggaaac
MA0625.2	MA0625.2.NFATC3	4.13787	0.82522	OCR369	154	162	+	agggaagag
MA1964.1	MA1964.1.SMAD2	4.13712	0.812076	OCR369	77	86	-	ccccatacct
UN0139.1	UN0139.1.YBX1	4.13292	0.83999	OCR369	324	332	-	cccaacacc
UN0243.1	UN0243.1.ZSCAN1	4.12679	0.805403	OCR369	122	138	+	gtacacacgcacacgga
MA0717.1	MA0717.1.RAX2	4.1118	0.801351	OCR369	221	228	-	gagattag
MA1986.1	MA1986.1.ZNF692	4.10992	0.811028	OCR369	348	357	+	tggacccaag
MA1570.1	MA1570.1.TFAP4	4.1047	0.816	OCR369	2	11	-	gagatatgac
UN0573.1	UN0573.1.MGA::DLX3	4.09549	0.808893	OCR369	323	334	+	aggtgttgggta
MA0887.1	MA0887.1.EVX1	4.09463	0.815767	OCR369	29	38	-	tgtaagtaag
MA1558.1	MA1558.1.SNAI1	4.09273	0.819928	OCR369	352	361	+	cccaagtgtt
MA0644.2	MA0644.2.ESX1	4.09073	0.848722	OCR369	30	37	+	ttacttac
MA1986.1	MA1986.1.ZNF692	4.08948	0.810675	OCR369	59	68	+	taggaccagc
MA0039.2	MA0039.2.Klf4	4.08379	0.805892	OCR369	135	144	+	cggatgtggc
MA0489.1	MA0489.1.JUN	4.07965	0.817432	OCR369	65	78	+	cagcaatgggtcag
MA0850.1	MA0850.1.FOXP3	4.07875	0.818306	OCR369	57	63	+	gttagga
MA1574.1	MA1574.1.THRB	4.06271	0.803287	OCR369	334	348	+	aggagcaaaggctgt
MA1497.1	MA1497.1.HOXA6	4.06268	0.800339	OCR369	29	38	+	cttacttaca
MA1516.1	MA1516.1.KLF3	4.04771	0.819298	OCR369	211	221	-	ggccaagccac
MA1481.1	MA1481.1.DRGX	4.04101	0.847053	OCR369	221	228	-	gagattag
MA0661.1	MA0661.1.MEOX1	4.03747	0.808797	OCR369	66	75	-	acccattgct
MA0710.1	MA0710.1.NOTO	4.02163	0.838848	OCR369	66	75	-	acccattgct
MA0738.1	MA0738.1.HIC2	4.01942	0.818107	OCR369	344	352	-	gtccacagc
UN0605.1	UN0605.1.ZNF264	4.01545	0.817802	OCR369	154	162	+	agggaagag
MA0909.3	MA0909.3.Hoxd13	4.01135	0.801905	OCR369	358	367	-	ggcagtaaca
MA0037.3	MA0037.3.GATA3	3.99388	0.813038	OCR369	239	246	-	agaaaagc
MA0811.1	MA0811.1.TFAP2B	3.9906	0.803641	OCR369	188	199	+	aggccagggcct
UN0605.1	UN0605.1.ZNF264	3.98597	0.817203	OCR369	211	219	+	gtggcttgg
MA0808.1	MA0808.1.TEAD3	3.9851	0.854088	OCR369	77	84	-	ccatacct
UN0580.1	UN0580.1.TCF15	3.97576	0.84435	OCR369	108	117	-	accgcatgga
MA1536.1	MA1536.1.NR2C2	3.96542	0.885624	OCR369	356	363	+	agtgttac
MA1507.1	MA1507.1.HOXD4	3.95436	0.848976	OCR369	67	74	-	cccattgc
MA0104.3	MA0104.3.Mycn	3.94348	0.807003	OCR369	137	144	-	gccacatc
UN0143.1	UN0143.1.ZBTB20	3.93928	0.821549	OCR369	108	119	-	tgaccgcatgga
MA1570.1	MA1570.1.TFAP4	3.93453	0.812753	OCR369	352	361	-	aacacttggg
UN0573.1	UN0573.1.MGA::DLX3	3.9294	0.806864	OCR369	355	366	+	aagtgttactgc
MA0803.1	MA0803.1.TBX15	3.92776	0.801643	OCR369	292	299	+	aagagtga
UN0610.1	UN0610.1.ZNF337	3.9257	0.812631	OCR369	270	281	-	aagaccagagag
UN0587.1	UN0587.1.ZBTB21	3.92188	0.807114	OCR369	73	82	-	atacctgacc
MA0519.1	MA0519.1.Stat5a::Stat5b	3.91388	0.841603	OCR369	144	154	-	ttctccaagag
UN0558.1	UN0558.1.HOXA3	3.91007	0.825047	OCR369	29	38	-	tgtaagtaag
UN0580.1	UN0580.1.TCF15	3.9095	0.843281	OCR369	123	132	+	tacacacgca
MA1116.1	MA1116.1.RBPJ	3.89754	0.804981	OCR369	152	161	+	gaagggaaga
MA0673.1	MA0673.1.NKX2-8	3.89158	0.84091	OCR369	155	163	-	cctcttccc
MA1501.1	MA1501.1.HOXB7	3.8742	0.800318	OCR369	56	65	-	ggtcctaacc
MA1554.1	MA1554.1.RFX7	3.87406	0.800747	OCR369	56	64	+	ggttaggac
UN0580.1	UN0580.1.TCF15	3.87362	0.842702	OCR369	251	260	+	gacctatgtt
MA0037.3	MA0037.3.GATA3	3.87094	0.810211	OCR369	42	49	+	tggtaagg
MA0672.1	MA0672.1.NKX2-3	3.84936	0.822235	OCR369	155	164	-	acctcttccc
MA0104.3	MA0104.3.Mycn	3.84491	0.80511	OCR369	110	117	-	accgcatg
MA0104.3	MA0104.3.Mycn	3.84491	0.80511	OCR369	172	179	-	accacagg
MA0493.2	MA0493.2.KLF1	3.84388	0.806068	OCR369	135	143	+	cggatgtgg
MA0819.2	MA0819.2.CLOCK	3.82287	0.800634	OCR369	109	118	-	gaccgcatgg
MA0878.3	MA0878.3.CDX1	3.82062	0.809925	OCR369	358	367	-	ggcagtaaca
MA0654.1	MA0654.1.ISX	3.81982	0.82197	OCR369	30	37	+	ttacttac
MA0027.2	MA0027.2.EN1	3.81309	0.824436	OCR369	30	37	+	ttacttac
MA1524.1	MA1524.1.MSGN1	3.81085	0.808875	OCR369	107	118	+	atccatgcggtc
MA1524.1	MA1524.1.MSGN1	3.80708	0.808806	OCR369	107	118	-	gaccgcatggat
MA0042.2	MA0042.2.FOXI1	3.80509	0.820085	OCR369	31	37	-	gtaagta
MA0028.2	MA0028.2.ELK1	3.79795	0.810312	OCR369	133	142	+	cacggatgtg
MA0035.3	MA0035.3.Gata1	3.79274	0.819794	OCR369	238	248	+	tgcttttctgg
MA0632.1	MA0632.1.Tcfl5	3.79102	0.80482	OCR369	123	132	+	tacacacgca
MA0632.1	MA0632.1.Tcfl5	3.79102	0.80482	OCR369	123	132	-	tgcgtgtgta
MA1964.1	MA1964.1.SMAD2	3.7896	0.804888	OCR369	241	250	-	acccagaaaa
UN0587.1	UN0587.1.ZBTB21	3.78724	0.804526	OCR369	197	206	-	ggaactcagg
MA0765.3	MA0765.3.ETV5	3.77672	0.8033	OCR369	133	142	+	cacggatgtg
MA0867.2	MA0867.2.SOX4	3.7714	0.808177	OCR369	65	74	+	cagcaatggg
MA1570.1	MA1570.1.TFAP4	3.73986	0.809038	OCR369	133	142	+	cacggatgtg
MA0103.3	MA0103.3.ZEB1	3.73876	0.806113	OCR369	84	94	-	acctcctgccc
MA1964.1	MA1964.1.SMAD2	3.73786	0.803818	OCR369	270	279	-	gaccagagag
UN0609.1	UN0609.1.ZNF333	3.73719	0.812645	OCR369	84	92	+	gggcaggag
UN0609.1	UN0609.1.ZNF333	3.73719	0.812645	OCR369	330	338	+	gggtaggag
MA0903.1	MA0903.1.HOXB3	3.73659	0.820829	OCR369	29	38	+	cttacttaca
UN0605.1	UN0605.1.ZNF264	3.73438	0.812091	OCR369	77	85	+	aggtatggg
MA0675.1	MA0675.1.NKX6-2	3.72641	0.803243	OCR369	67	74	-	cccattgc
MA0810.1	MA0810.1.TFAP2A	3.72589	0.810789	OCR369	188	199	-	aggccctggcct
MA0032.2	MA0032.2.FOXC1	3.70325	0.809081	OCR369	119	129	+	agtgtacacac
MA0719.1	MA0719.1.RHOXF1	3.68933	0.875396	OCR369	4	11	+	catatctc
MA0682.2	MA0682.2.PITX1	3.68538	0.823209	OCR369	276	283	-	ctaagacc
MA1518.1	MA1518.1.LHX1	3.67773	0.806554	OCR369	67	74	-	cccattgc
MA1570.1	MA1570.1.TFAP4	3.6711	0.807726	OCR369	14	23	+	atgagatggc
MA1542.1	MA1542.1.OSR1	3.66247	0.803383	OCR369	358	367	+	tgttactgcc
MA0738.1	MA0738.1.HIC2	3.65435	0.809979	OCR369	301	309	+	ataccacag
MA0599.1	MA0599.1.KLF5	3.64896	0.849673	OCR369	266	275	+	ccccctctct
UN0243.1	UN0243.1.ZSCAN1	3.64102	0.8009	OCR369	120	136	+	gtgtacacacgcacacg
MA0625.2	MA0625.2.NFATC3	3.63632	0.813536	OCR369	200	208	-	tgggaactc
MA1570.1	MA1570.1.TFAP4	3.61644	0.806683	OCR369	14	23	-	gccatctcat
MA1500.1	MA1500.1.HOXB6	3.58907	0.839603	OCR369	279	286	+	cttagggc
MA0498.2	MA0498.2.MEIS1	3.58457	0.856656	OCR369	19	25	+	atggcag
MA1500.1	MA1500.1.HOXB6	3.57576	0.839324	OCR369	57	64	+	gttaggac
MA1099.2	MA1099.2.HES1	3.57571	0.827183	OCR369	129	138	-	tccgtgtgcg
MA0893.2	MA0893.2.GSX2	3.55544	0.844762	OCR369	221	228	-	gagattag
MA1633.2	MA1633.2.BACH1	3.53337	0.818171	OCR369	70	78	-	ctgacccat
MA0674.1	MA0674.1.NKX6-1	3.53301	0.813651	OCR369	67	74	-	cccattgc
MA0682.2	MA0682.2.PITX1	3.49827	0.819639	OCR369	54	61	-	ctaaccca
MA1965.1	MA1965.1.SP5	3.49435	0.817778	OCR369	153	162	-	ctcttccctt
MA1525.2	MA1525.2.NFATC4	3.49204	0.805271	OCR369	201	210	-	ggtgggaact
MA0850.1	MA0850.1.FOXP3	3.48725	0.803424	OCR369	338	344	+	gcaaagg
UN0605.1	UN0605.1.ZNF264	3.46121	0.806541	OCR369	319	327	+	gagaaggtg
MA0879.2	MA0879.2.DLX1	3.45152	0.83487	OCR369	67	74	-	cccattgc
MA1524.1	MA1524.1.MSGN1	3.4407	0.802099	OCR369	65	76	+	cagcaatgggtc
MA0668.1	MA0668.1.NEUROD2	3.43578	0.820914	OCR369	2	11	-	gagatatgac
MA1532.2	MA1532.2.NR1D2	3.43147	0.820011	OCR369	46	60	+	aaggttcctgggtta
MA0723.2	MA0723.2.VAX2	3.42745	0.845357	OCR369	221	228	-	gagattag
MA1500.1	MA1500.1.HOXB6	3.41543	0.835965	OCR369	359	366	+	gttactgc
MA0671.1	MA0671.1.NFIX	3.4053	0.825675	OCR369	82	90	+	tggggcagg
MA0879.2	MA0879.2.DLX1	3.40333	0.833811	OCR369	221	228	+	ctaatctc
MA1498.2	MA1498.2.HOXA7	3.37573	0.803954	OCR369	359	366	-	gcagtaac
MA0654.1	MA0654.1.ISX	3.35024	0.811845	OCR369	30	37	-	gtaagtaa
MA0632.2	MA0632.2.TCFL5	3.34801	0.831212	OCR369	130	139	+	gcacacggat
MA0704.1	MA0704.1.Lhx4	3.34719	0.801338	OCR369	221	228	-	gagattag
MA0801.1	MA0801.1.MGA	3.34689	0.803049	OCR369	204	211	-	cggtggga
MA0499.1	MA0499.1.Myod1	3.34324	0.83319	OCR369	317	329	-	aacaccttctcct
UN0610.1	UN0610.1.ZNF337	3.34131	0.802295	OCR369	277	288	-	tggccctaagac
MA0705.1	MA0705.1.Lhx8	3.33968	0.840315	OCR369	67	74	-	cccattgc
MA0766.2	MA0766.2.GATA5	3.33867	0.834698	OCR369	238	247	-	cagaaaagca
MA0867.2	MA0867.2.SOX4	3.32984	0.800275	OCR369	311	320	+	gtacagagga
MA0132.2	MA0132.2.PDX1	3.31192	0.830752	OCR369	221	228	-	gagattag
MA0632.2	MA0632.2.TCFL5	3.30715	0.830665	OCR369	109	118	+	ccatgcggtc
MA0912.2	MA0912.2.HOXD3	3.30416	0.825375	OCR369	30	37	+	ttacttac
MA0701.2	MA0701.2.LHX9	3.28546	0.818268	OCR369	67	74	-	cccattgc
UN0139.1	UN0139.1.YBX1	3.26028	0.825386	OCR369	297	305	+	tgatatacc
MA0720.1	MA0720.1.Shox2	3.25077	0.809205	OCR369	30	37	+	ttacttac
MA0498.2	MA0498.2.MEIS1	3.24969	0.849564	OCR369	363	369	-	ctggcag
MA0033.2	MA0033.2.FOXL1	3.20944	0.834147	OCR369	176	182	-	gcaacca
MA0711.1	MA0711.1.OTX1	3.19356	0.821595	OCR369	276	283	-	ctaagacc
MA0888.1	MA0888.1.EVX2	3.15664	0.802703	OCR369	66	75	-	acccattgct
MA1108.2	MA1108.2.MXI1	3.15558	0.822999	OCR369	352	361	-	aacacttggg
MA0671.1	MA0671.1.NFIX	3.14636	0.819579	OCR369	282	290	+	agggccact
MA1507.1	MA1507.1.HOXD4	3.14527	0.832437	OCR369	30	37	-	gtaagtaa
MA0810.1	MA0810.1.TFAP2A	3.13988	0.801694	OCR369	188	199	+	aggccagggcct
UN0134.1	UN0134.1.RHOXF2	3.13541	0.825252	OCR369	54	61	-	ctaaccca
MA0890.1	MA0890.1.GBX2	3.12999	0.805437	OCR369	220	229	-	ggagattagg
UN0580.1	UN0580.1.TCF15	3.12924	0.830691	OCR369	352	361	-	aacacttggg
MA0671.1	MA0671.1.NFIX	3.12689	0.819121	OCR369	201	209	+	agttcccac
MA0599.1	MA0599.1.KLF5	3.12271	0.842978	OCR369	342	351	-	tccacagcct
MA1496.1	MA1496.1.HOXA4	3.12164	0.836317	OCR369	104	111	+	gtcatcca
MA1500.1	MA1500.1.HOXB6	3.12051	0.829786	OCR369	30	37	+	ttacttac
MA0708.2	MA0708.2.MSX2	3.10237	0.822484	OCR369	30	37	+	ttacttac
MA0599.1	MA0599.1.KLF5	3.10084	0.8427	OCR369	330	339	-	gctcctaccc
MA0668.1	MA0668.1.NEUROD2	3.09112	0.815282	OCR369	232	241	+	accacttgct
UN0139.1	UN0139.1.YBX1	3.08337	0.822425	OCR369	162	170	-	ctccctacc
UN0139.1	UN0139.1.YBX1	3.08337	0.822425	OCR369	226	234	+	ctccctacc
MA0818.2	MA0818.2.BHLHE22	3.06562	0.81254	OCR369	251	260	+	gacctatgtt
MA1110.2	MA1110.2.Nr1H4	3.06121	0.801948	OCR369	186	195	+	ctaggccagg
MA0158.2	MA0158.2.HOXA5	3.04211	0.826727	OCR369	30	37	-	gtaagtaa
MA0042.2	MA0042.2.FOXI1	3.04195	0.805505	OCR369	346	352	-	gtccaca
MA0910.2	MA0910.2.HOXD8	3.0291	0.818264	OCR369	30	37	-	gtaagtaa
MA0848.1	MA0848.1.FOXO4	3.02864	0.80853	OCR369	257	263	-	accaaca
MA0893.2	MA0893.2.GSX2	3.01894	0.834186	OCR369	30	37	-	gtaagtaa
MA1502.1	MA1502.1.HOXB8	3.00338	0.823543	OCR369	30	37	-	gtaagtaa
MA0623.2	MA0623.2.NEUROG1	2.98942	0.811814	OCR369	2	11	-	gagatatgac
MA0522.1	MA0522.1.Tcf3	2.98939	0.825011	OCR369	319	329	-	aacaccttctc
UN0134.1	UN0134.1.RHOXF2	2.98115	0.822476	OCR369	276	283	-	ctaagacc
MA0132.2	MA0132.2.PDX1	2.97783	0.824069	OCR369	30	37	-	gtaagtaa
MA0482.1	MA0482.1.Gata4	2.97435	0.814553	OCR369	239	249	+	gcttttctggg
MA1534.1	MA1534.1.NR1I3	2.9572	0.819935	OCR369	100	108	-	atgacccca
MA0519.1	MA0519.1.Stat5a::Stat5b	2.95396	0.829872	OCR369	8	18	+	tctcctatgag
MA0673.1	MA0673.1.NKX2-8	2.94942	0.823873	OCR369	74	82	-	atacctgac
MA0033.2	MA0033.2.FOXL1	2.94341	0.829275	OCR369	346	352	-	gtccaca
UN0139.1	UN0139.1.YBX1	2.91582	0.819621	OCR369	298	306	-	tggtatatc
MA1536.1	MA1536.1.NR2C2	2.88986	0.865982	OCR369	264	271	-	agggggaa
MA1499.1	MA1499.1.HOXB4	2.88923	0.828895	OCR369	30	37	-	gtaagtaa
MA0876.1	MA0876.1.BSX	2.87422	0.821977	OCR369	30	37	+	ttacttac
UN0139.1	UN0139.1.YBX1	2.86866	0.818832	OCR369	321	329	-	aacaccttc
MA0720.1	MA0720.1.Shox2	2.85051	0.800226	OCR369	11	18	+	cctatgag
MA1505.1	MA1505.1.HOXC8	2.83895	0.833531	OCR369	30	37	+	ttacttac
MA1563.2	MA1563.2.SOX18	2.83369	0.80709	OCR369	307	314	+	cagagtac
MA0035.3	MA0035.3.Gata1	2.83117	0.806619	OCR369	159	169	-	tccctacctct
MA0147.2	MA0147.2.Myc	2.82005	0.81621	OCR369	136	145	+	ggatgtggct
MA0668.1	MA0668.1.NEUROD2	2.81501	0.810769	OCR369	129	138	+	cgcacacgga
MA1108.2	MA1108.2.MXI1	2.79807	0.816319	OCR369	170	179	-	accacaggcc
UN0143.1	UN0143.1.ZBTB20	2.76708	0.802812	OCR369	104	115	+	gtcatccatgcg
MA0482.1	MA0482.1.Gata4	2.76638	0.811563	OCR369	158	168	-	ccctacctctt
MA0027.2	MA0027.2.EN1	2.75657	0.801479	OCR369	30	37	-	gtaagtaa
MA1577.1	MA1577.1.TLX2	2.7504	0.808313	OCR369	221	228	-	gagattag
MA0666.2	MA0666.2.MSX1	2.74595	0.810304	OCR369	30	37	-	gtaagtaa
MA0766.2	MA0766.2.GATA5	2.72695	0.824842	OCR369	41	50	+	gtggtaaggt
MA0668.1	MA0668.1.NEUROD2	2.72086	0.809231	OCR369	123	132	+	tacacacgca
MA0522.1	MA0522.1.Tcf3	2.71217	0.821324	OCR369	232	242	+	accacttgctt
MA0818.2	MA0818.2.BHLHE22	2.7109	0.807473	OCR369	108	117	-	accgcatgga
MA1684.1	MA1684.1.Foxn1	2.70109	0.844253	OCR369	167	172	+	ggaggc
MA1500.1	MA1500.1.HOXB6	2.68402	0.82064	OCR369	286	293	-	ttcagtgg
MA0147.2	MA0147.2.Myc	2.67196	0.814037	OCR369	351	360	-	acacttgggt
MA0519.1	MA0519.1.Stat5a::Stat5b	2.67048	0.826407	OCR369	312	322	-	tctcctctgta
MA0644.2	MA0644.2.ESX1	2.66951	0.822616	OCR369	221	228	+	ctaatctc
MA0673.1	MA0673.1.NKX2-8	2.6578	0.8186	OCR369	286	294	+	ccactgaag
MA1496.1	MA1496.1.HOXA4	2.64963	0.826749	OCR369	175	182	+	gtggttgc
MA1535.1	MA1535.1.NR2C1	2.63878	0.82223	OCR369	23	31	+	cagggtctt
MA1108.2	MA1108.2.MXI1	2.6292	0.813163	OCR369	232	241	+	accacttgct
MA1500.1	MA1500.1.HOXB6	2.6275	0.819456	OCR369	353	360	+	ccaagtgt
MA0499.1	MA0499.1.Myod1	2.62623	0.823973	OCR369	232	244	+	accacttgctttt
MA0808.1	MA0808.1.TEAD3	2.61859	0.832933	OCR369	299	306	+	atatacca
MA0488.1	MA0488.1.JUN	2.61081	0.816155	OCR369	96	108	+	tgactggggtcat
MA1547.2	MA1547.2.PITX2	2.59499	0.80185	OCR369	54	61	-	ctaaccca
MA0479.1	MA0479.1.FOXH1	2.59277	0.809101	OCR369	257	267	-	ggaaaccaaca
MA0479.1	MA0479.1.FOXH1	2.59179	0.809087	OCR369	346	356	-	ttgggtccaca
MA1505.1	MA1505.1.HOXC8	2.57076	0.828199	OCR369	11	18	+	cctatgag
MA1481.1	MA1481.1.DRGX	2.54145	0.817113	OCR369	30	37	+	ttacttac
UN0580.1	UN0580.1.TCF15	2.52301	0.82091	OCR369	129	138	+	cgcacacgga
MA0673.1	MA0673.1.NKX2-8	2.52008	0.81611	OCR369	30	38	+	ttacttaca
MA0132.2	MA0132.2.PDX1	2.51672	0.814845	OCR369	30	37	+	ttacttac
MA0158.2	MA0158.2.HOXA5	2.51374	0.816904	OCR369	30	37	+	ttacttac
MA0875.1	MA0875.1.BARX1	2.50508	0.808655	OCR369	30	37	+	ttacttac
MA0893.2	MA0893.2.GSX2	2.50388	0.824033	OCR369	67	74	+	gcaatggg
MA1505.1	MA1505.1.HOXC8	2.50235	0.826839	OCR369	11	18	-	ctcatagg
MA1638.1	MA1638.1.HAND2	2.49268	0.810314	OCR369	312	321	+	tacagaggag
UN0580.1	UN0580.1.TCF15	2.47898	0.820199	OCR369	108	117	+	tccatgcggt
MA1536.1	MA1536.1.NR2C2	2.47453	0.858397	OCR369	18	25	+	gatggcag
MA1577.1	MA1577.1.TLX2	2.46862	0.802437	OCR369	30	37	-	gtaagtaa
MA0723.2	MA0723.2.VAX2	2.46651	0.823847	OCR369	286	293	+	ccactgaa
MA1099.2	MA1099.2.HES1	2.45507	0.809393	OCR369	125	134	-	tgtgcgtgtg
MA1500.1	MA1500.1.HOXB6	2.45479	0.815837	OCR369	116	123	+	gtcagtgt
MA0666.2	MA0666.2.MSX1	2.44164	0.804379	OCR369	30	37	+	ttacttac
MA1535.1	MA1535.1.NR2C1	2.44154	0.818432	OCR369	281	289	+	tagggccac
MA1505.1	MA1505.1.HOXC8	2.43007	0.825402	OCR369	233	240	-	gcaagtgg
MA1481.1	MA1481.1.DRGX	2.42792	0.814847	OCR369	67	74	-	cccattgc
MA0476.1	MA0476.1.FOS	2.42432	0.821272	OCR369	69	79	-	cctgacccatt
MA0668.1	MA0668.1.NEUROD2	2.41301	0.8042	OCR369	170	179	-	accacaggcc
MA1534.1	MA1534.1.NR1I3	2.40065	0.811261	OCR369	34	42	+	ttacactgt
MA0701.2	MA0701.2.LHX9	2.37644	0.801462	OCR369	30	37	-	gtaagtaa
MA0708.2	MA0708.2.MSX2	2.3651	0.808366	OCR369	30	37	-	gtaagtaa
MA0612.2	MA0612.2.EMX1	2.36089	0.811439	OCR369	30	37	+	ttacttac
MA0818.2	MA0818.2.BHLHE22	2.34352	0.802225	OCR369	108	117	+	tccatgcggt
MA0893.2	MA0893.2.GSX2	2.33592	0.820722	OCR369	285	292	+	gccactga
MA0902.2	MA0902.2.HOXB2	2.25139	0.821395	OCR369	30	37	-	gtaagtaa
UN0580.1	UN0580.1.TCF15	2.23996	0.816343	OCR369	232	241	+	accacttgct
MA0668.1	MA0668.1.NEUROD2	2.22955	0.801202	OCR369	133	142	-	cacatccgtg
MA1534.1	MA1534.1.NR1I3	2.22133	0.808466	OCR369	70	78	-	ctgacccat
MA0668.1	MA0668.1.NEUROD2	2.19195	0.800588	OCR369	76	85	+	caggtatggg
MA1500.1	MA1500.1.HOXB6	2.18173	0.810116	OCR369	233	240	-	gcaagtgg
MA0711.1	MA0711.1.OTX1	2.17385	0.801715	OCR369	26	33	-	gtaagacc
MA0904.2	MA0904.2.HOXB5	2.17379	0.804712	OCR369	30	37	+	ttacttac
MA0612.2	MA0612.2.EMX1	2.17046	0.807954	OCR369	30	37	-	gtaagtaa
MA1504.1	MA1504.1.HOXC4	2.16626	0.826942	OCR369	30	37	-	gtaagtaa
MA1536.1	MA1536.1.NR2C2	2.1582	0.85262	OCR369	324	331	+	ggtgttgg
MA0886.1	MA0886.1.EMX2	2.15134	0.806644	OCR369	220	229	-	ggagattagg
MA1496.1	MA1496.1.HOXA4	2.15061	0.816632	OCR369	67	74	+	gcaatggg
MA0522.1	MA0522.1.Tcf3	2.14766	0.813815	OCR369	84	94	-	acctcctgccc
MA0723.2	MA0723.2.VAX2	2.14396	0.816627	OCR369	2	9	-	gatatgac
MA1495.1	MA1495.1.HOXA1	2.08635	0.822052	OCR369	30	37	+	ttacttac
MA0879.2	MA0879.2.DLX1	2.07982	0.804731	OCR369	16	23	-	gccatctc
MA1476.1	MA1476.1.DLX5	2.07634	0.81509	OCR369	30	37	-	gtaagtaa
MA0644.2	MA0644.2.ESX1	2.05837	0.811389	OCR369	67	74	-	cccattgc
MA0708.2	MA0708.2.MSX2	2.05679	0.802462	OCR369	221	228	-	gagattag
MA0900.2	MA0900.2.HOXA2	2.05222	0.830339	OCR369	67	74	-	cccattgc
MA0498.2	MA0498.2.MEIS1	2.03962	0.823938	OCR369	296	302	+	gtgatat
MA0904.2	MA0904.2.HOXB5	2.03003	0.801838	OCR369	30	37	-	gtaagtaa
MA0705.1	MA0705.1.Lhx8	2.02305	0.815445	OCR369	67	74	+	gcaatggg
MA0879.2	MA0879.2.DLX1	2.02016	0.80342	OCR369	11	18	+	cctatgag
MA0719.1	MA0719.1.RHOXF1	2.01773	0.843176	OCR369	101	108	-	atgacccc
MA0707.2	MA0707.2.MNX1	2.00495	0.838162	OCR369	221	228	-	gagattag
MA0639.1	MA0639.1.DBP	1.98068	0.806448	OCR369	295	306	+	agtgatatacca
MA0147.2	MA0147.2.Myc	1.93944	0.803285	OCR369	353	362	+	ccaagtgtta
MA0599.1	MA0599.1.KLF5	1.93024	0.827808	OCR369	83	92	-	ctcctgcccc
MA1519.1	MA1519.1.LHX5	1.9277	0.800458	OCR369	30	37	+	ttacttac
UN0124.1	UN0124.1.HOXB1	1.92054	0.805162	OCR369	104	111	+	gtcatcca
MA1505.1	MA1505.1.HOXC8	1.89184	0.814701	OCR369	116	123	+	gtcagtgt
MA0488.1	MA0488.1.JUN	1.88416	0.808241	OCR369	216	228	-	gagattaggccaa
MA1684.1	MA1684.1.Foxn1	1.87649	0.826797	OCR369	349	354	+	ggaccc
UN0134.1	UN0134.1.RHOXF2	1.85701	0.802243	OCR369	104	111	+	gtcatcca
MA0599.1	MA0599.1.KLF5	1.84962	0.826783	OCR369	203	212	+	ttcccaccgt
MA1495.1	MA1495.1.HOXA1	1.83776	0.817302	OCR369	30	37	-	gtaagtaa
UN0580.1	UN0580.1.TCF15	1.83366	0.809787	OCR369	170	179	-	accacaggcc
MA0492.1	MA0492.1.JUND	1.82178	0.816563	OCR369	292	306	+	aagagtgatatacca
MA1484.1	MA1484.1.ETS2	1.79585	0.814371	OCR369	109	118	-	gaccgcatgg
MA0464.1	MA0464.1.Bhlhe40	1.74469	0.806747	OCR369	123	133	+	tacacacgcac
UN0580.1	UN0580.1.TCF15	1.73414	0.808181	OCR369	352	361	+	cccaagtgtt
MA1536.1	MA1536.1.NR2C2	1.73259	0.844848	OCR369	265	272	-	gaggggga
MA0673.1	MA0673.1.NKX2-8	1.72596	0.80175	OCR369	316	324	-	cttctcctc
MA0500.1	MA0500.1.Myog	1.72222	0.817099	OCR369	85	95	+	ggcaggaggta
MA0719.1	MA0719.1.RHOXF1	1.68031	0.836672	OCR369	54	61	-	ctaaccca
MA0900.2	MA0900.2.HOXA2	1.66589	0.824135	OCR369	30	37	-	gtaagtaa
MA0705.1	MA0705.1.Lhx8	1.66158	0.808617	OCR369	30	37	+	ttacttac
MA0158.2	MA0158.2.HOXA5	1.64845	0.800817	OCR369	67	74	-	cccattgc
MA0705.1	MA0705.1.Lhx8	1.6432	0.80827	OCR369	30	37	-	gtaagtaa
MA0723.2	MA0723.2.VAX2	1.64183	0.805388	OCR369	2	9	+	gtcatatc
UN0580.1	UN0580.1.TCF15	1.63895	0.806645	OCR369	232	241	-	agcaagtggt
MA0719.1	MA0719.1.RHOXF1	1.63559	0.83581	OCR369	71	78	-	ctgaccca
MA1536.1	MA1536.1.NR2C2	1.63148	0.843002	OCR369	34	41	-	cagtgtaa
MA0705.1	MA0705.1.Lhx8	1.58947	0.807255	OCR369	221	228	+	ctaatctc
MA0719.1	MA0719.1.RHOXF1	1.58565	0.834848	OCR369	104	111	+	gtcatcca
MA0500.1	MA0500.1.Myog	1.58093	0.815206	OCR369	231	241	-	agcaagtggta
MA1536.1	MA1536.1.NR2C2	1.54164	0.841361	OCR369	118	125	+	cagtgtac
MA1684.1	MA1684.1.Foxn1	1.51275	0.819097	OCR369	48	53	-	ggaacc
MA1684.1	MA1684.1.Foxn1	1.51275	0.819097	OCR369	156	161	+	ggaaga
MA1684.1	MA1684.1.Foxn1	1.51275	0.819097	OCR369	262	267	-	ggaaac
MA0902.2	MA0902.2.HOXB2	1.46513	0.806606	OCR369	30	37	+	ttacttac
MA0670.1	MA0670.1.NFIA	1.45473	0.814364	OCR369	17	26	-	cctgccatct
MA0498.2	MA0498.2.MEIS1	1.4366	0.811168	OCR369	211	217	-	aagccac
MA1536.1	MA1536.1.NR2C2	1.4048	0.838862	OCR369	137	144	+	gatgtggc
MA1484.1	MA1484.1.ETS2	1.38685	0.808997	OCR369	85	94	+	ggcaggaggt
MA0599.1	MA0599.1.KLF5	1.38159	0.820829	OCR369	329	338	-	ctcctaccca
MA1505.1	MA1505.1.HOXC8	1.37791	0.804483	OCR369	353	360	+	ccaagtgt
MA0599.1	MA0599.1.KLF5	1.36356	0.820599	OCR369	316	325	-	ccttctcctc
MA1496.1	MA1496.1.HOXA4	1.3631	0.800667	OCR369	116	123	+	gtcagtgt
MA0498.2	MA0498.2.MEIS1	1.35951	0.809535	OCR369	179	185	+	ttgcctg
MA0144.2	MA0144.2.STAT3	1.35691	0.813993	OCR369	241	251	-	cacccagaaaa
UN0580.1	UN0580.1.TCF15	1.33633	0.801762	OCR369	133	142	+	cacggatgtg
MA1536.1	MA1536.1.NR2C2	1.28661	0.836703	OCR369	255	262	+	tatgttgg
MA0632.2	MA0632.2.TCFL5	1.21591	0.802643	OCR369	128	137	-	ccgtgtgcgt
MA0599.1	MA0599.1.KLF5	1.21176	0.818668	OCR369	84	93	-	cctcctgccc
MA0492.1	MA0492.1.JUND	1.17247	0.809941	OCR369	95	109	+	atgactggggtcatc
MA0670.1	MA0670.1.NFIA	1.17164	0.81	OCR369	214	223	-	taggccaagc
MA1684.1	MA1684.1.Foxn1	1.07894	0.809914	OCR369	25	30	-	agaccc
MA1684.1	MA1684.1.Foxn1	1.07894	0.809914	OCR369	126	131	+	acacgc
MA0476.1	MA0476.1.FOS	1.02979	0.802673	OCR369	69	79	+	aatgggtcagg
MA0498.2	MA0498.2.MEIS1	1.0119	0.802174	OCR369	188	194	+	aggccag
MA0500.1	MA0500.1.Myog	1.00348	0.807469	OCR369	320	330	+	agaaggtgttg
MA1536.1	MA1536.1.NR2C2	0.993011	0.831342	OCR369	205	212	-	acggtggg
MA1536.1	MA1536.1.NR2C2	0.903548	0.829708	OCR369	24	31	+	agggtctt
MA0599.1	MA0599.1.KLF5	0.871765	0.814343	OCR369	161	170	-	ctccctacct
MA1684.1	MA1684.1.Foxn1	0.81124	0.804247	OCR369	72	77	-	tgaccc
MA1684.1	MA1684.1.Foxn1	0.81124	0.804247	OCR369	102	107	-	tgaccc
MA0599.1	MA0599.1.KLF5	0.805286	0.813497	OCR369	226	235	+	ctccctacca
MA1536.1	MA1536.1.NR2C2	0.797676	0.827774	OCR369	282	289	+	agggccac
MA0599.1	MA0599.1.KLF5	0.766325	0.813002	OCR369	154	163	-	cctcttccct
MA0719.1	MA0719.1.RHOXF1	0.745371	0.818652	OCR369	334	341	-	ttgctcct
MA0144.2	MA0144.2.STAT3	0.735096	0.80646	OCR369	150	160	+	gagaagggaag
MA1684.1	MA1684.1.Foxn1	0.715198	0.802214	OCR369	151	156	+	agaagg
MA1684.1	MA1684.1.Foxn1	0.715198	0.802214	OCR369	239	244	-	aaaagc
MA1684.1	MA1684.1.Foxn1	0.715198	0.802214	OCR369	320	325	+	agaagg
MA1684.1	MA1684.1.Foxn1	0.715198	0.802214	OCR369	334	339	+	aggagc
MA0492.1	MA0492.1.JUND	0.68049	0.804923	OCR369	107	121	+	atccatgcggtcagt
MA0707.2	MA0707.2.MNX1	0.580878	0.812721	OCR369	30	37	-	gtaagtaa
MA0599.1	MA0599.1.KLF5	0.495272	0.809553	OCR369	54	63	-	tcctaaccca
MA0719.1	MA0719.1.RHOXF1	0.475703	0.813454	OCR369	60	67	-	ctggtcct
MA0900.2	MA0900.2.HOXA2	0.356223	0.803101	OCR369	30	37	+	ttacttac
MA0719.1	MA0719.1.RHOXF1	0.332789	0.810699	OCR369	217	224	-	ttaggcca
MA0599.1	MA0599.1.KLF5	0.317297	0.807289	OCR369	160	169	-	tccctacctc
MA0144.2	MA0144.2.STAT3	0.272289	0.800853	OCR369	325	335	+	gtgttgggtag
MA0719.1	MA0719.1.RHOXF1	0.161765	0.807403	OCR369	276	283	-	ctaagacc
MA1536.1	MA1536.1.NR2C2	0.0775939	0.814624	OCR369	230	237	-	agtggtag
MA0719.1	MA0719.1.RHOXF1	0.0631215	0.805501	OCR369	186	193	+	ctaggcca
MA0719.1	MA0719.1.RHOXF1	0.0631215	0.805501	OCR369	212	219	-	ccaagcca
MA1536.1	MA1536.1.NR2C2	0.0576466	0.81426	OCR369	216	223	-	taggccaa
MA0599.1	MA0599.1.KLF5	0.0319347	0.803659	OCR369	193	202	-	ctcaggccct
MA1536.1	MA1536.1.NR2C2	-0.226718	0.809067	OCR369	348	355	-	tgggtcca
MA0468.1	MA0468.1.DUX4	-0.30484	0.80238	OCR369	217	227	+	tggcctaatct
MA1536.1	MA1536.1.NR2C2	-0.39778	0.805943	OCR369	187	194	+	taggccag
MA1536.1	MA1536.1.NR2C2	-0.565185	0.802886	OCR369	301	308	-	tgtggtat
MA1536.1	MA1536.1.NR2C2	-0.581215	0.802593	OCR369	40	47	+	tgtggtaa
